# Supplementary material for: Polypharmacy during pregnancy and associated risk factors: a retrospective analysis of 577 medication exposures among 1.5 million pregnancies in the UK, 2000-2019
Source: Springer Nature journal article supplement (doi:10.1186/s12916-022-02722-5), 2023-01-16
Supplement: MOESM2 [file 23925810]

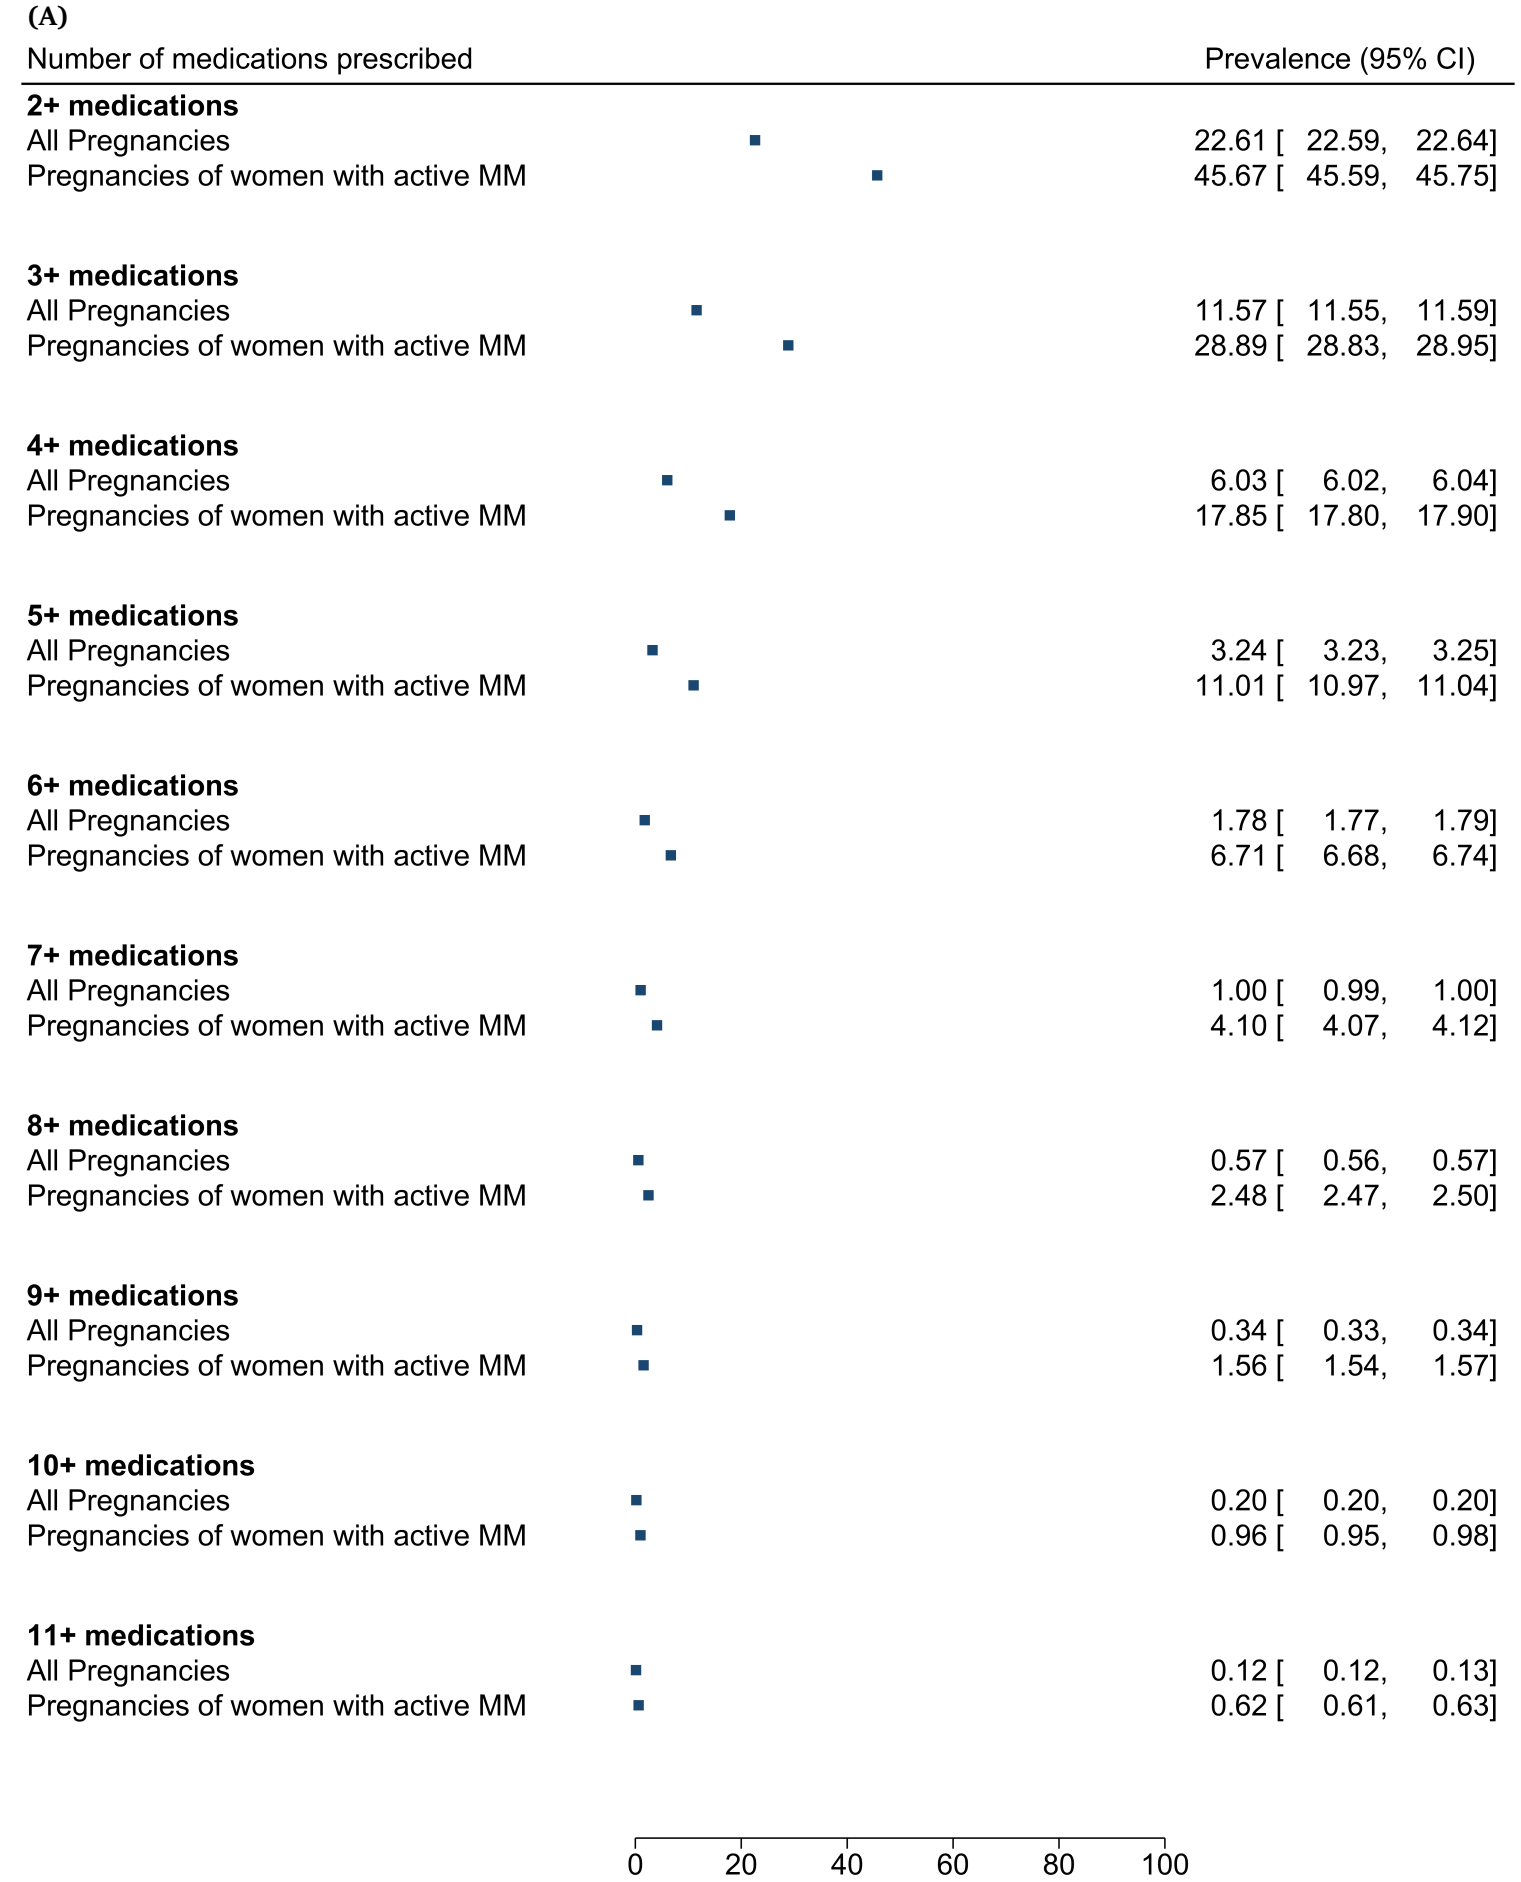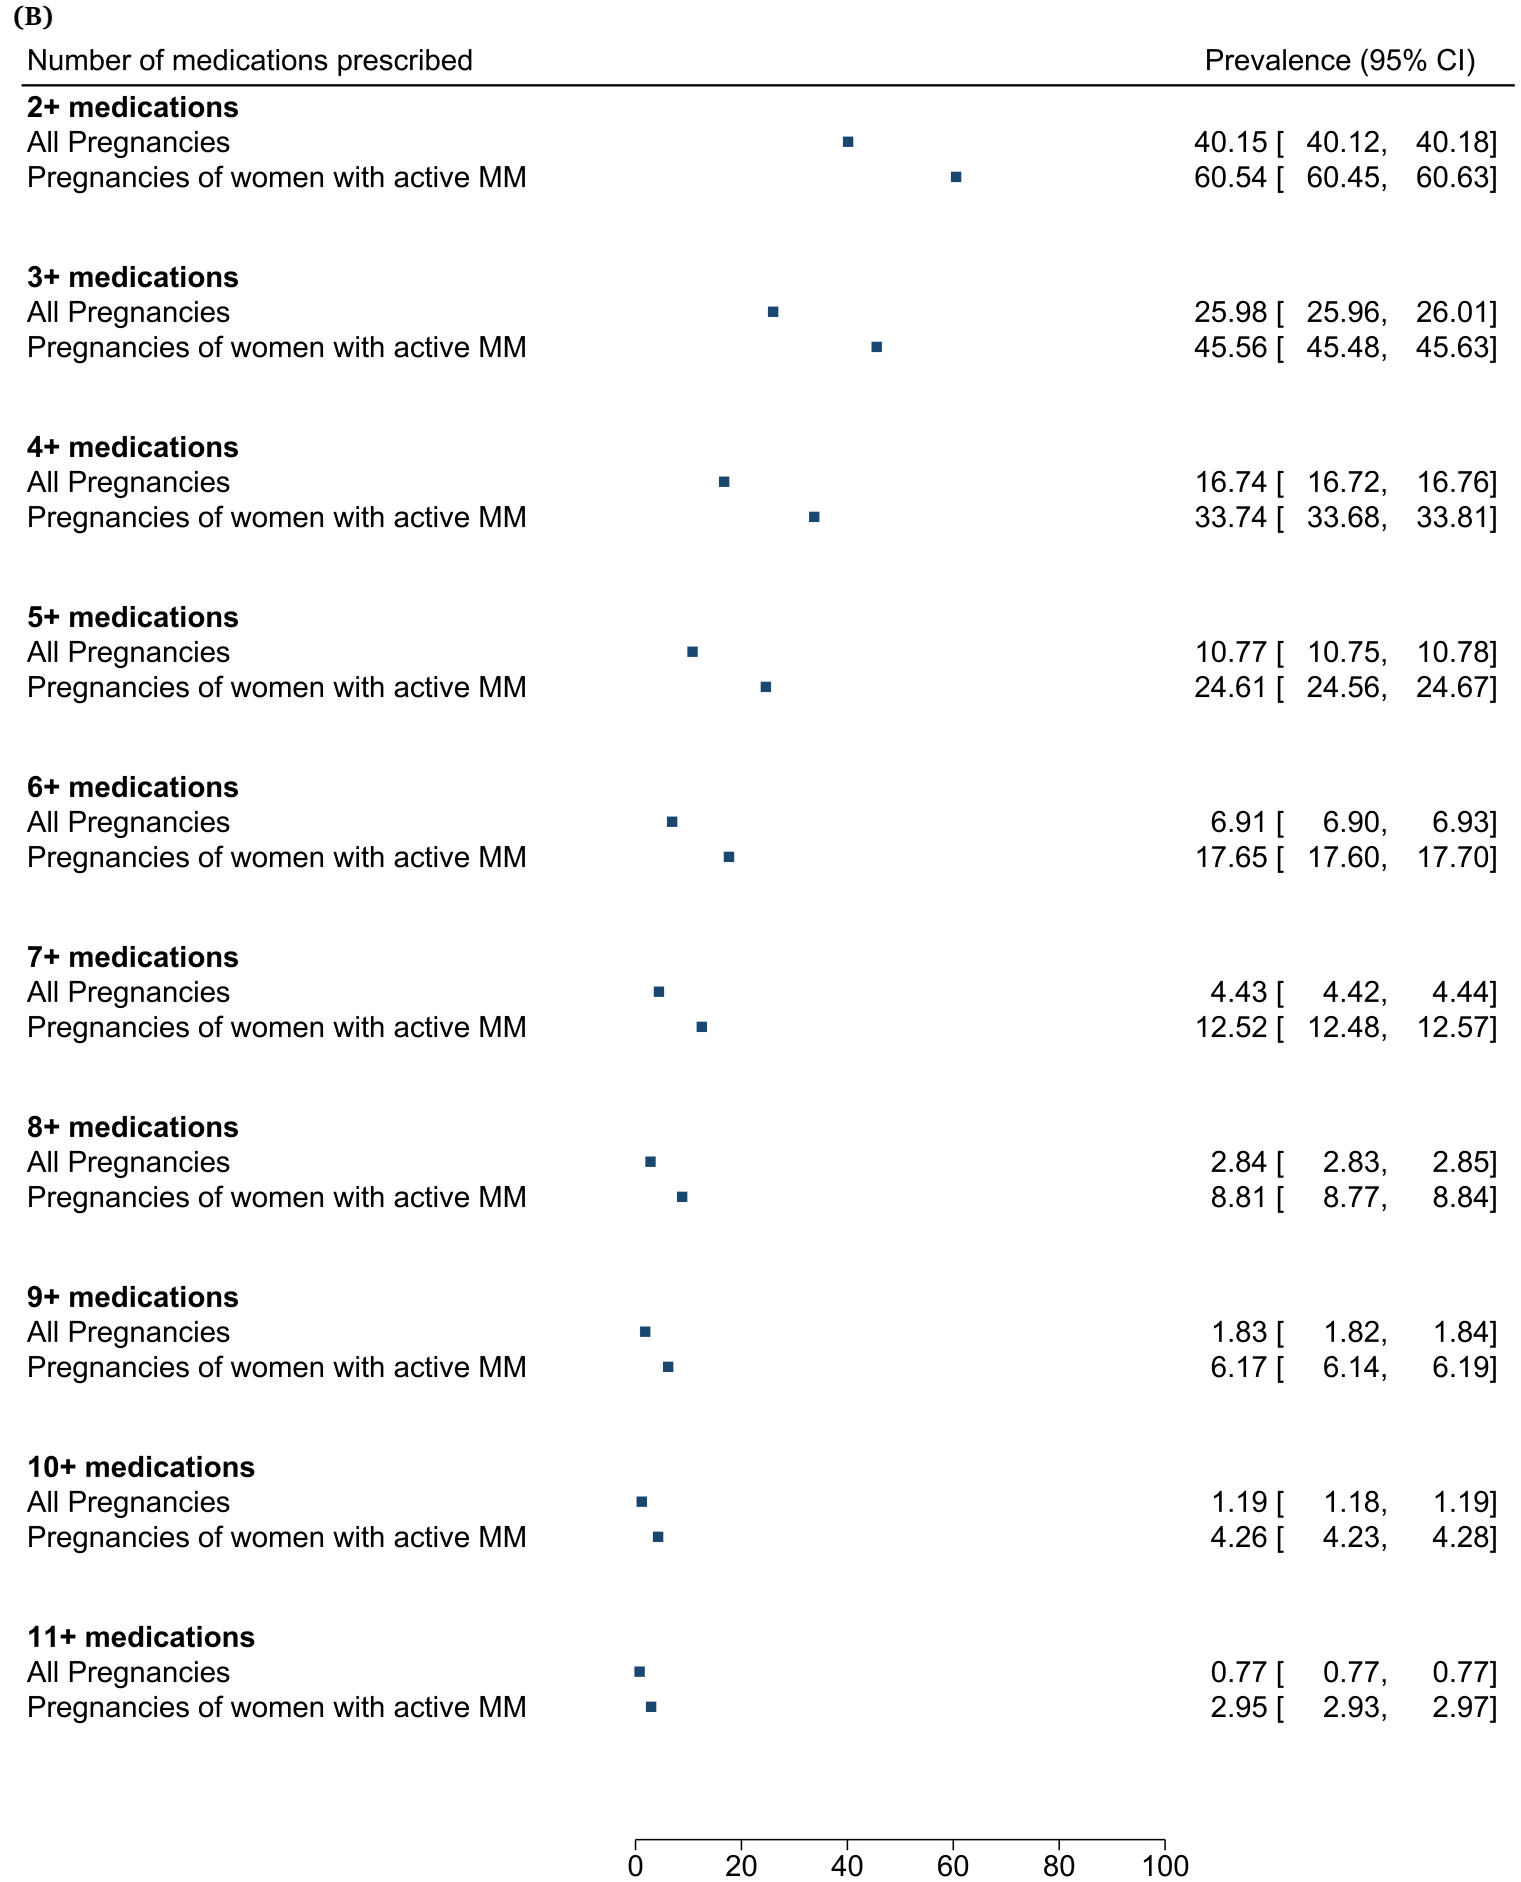

MM: MultiMorbidity

MM: MultiMorbidity
