# Supplementary material for: Polypharmacy during pregnancy and associated risk factors: a retrospective analysis of 577 medication exposures among 1.5 million pregnancies in the UK, 2000-2019
Source: Springer Nature journal article supplement (doi:10.1186/s12916-022-02722-5), 2023-01-16
Supplement: MOESM8 [file 23925810]

**Risk Factors**

**Adj. OR (95% CI)**

**Age (in years)**

|       |                    |
|-------|--------------------|
| 15-19 | 2.16 [ 2.12, 2.21] |
| 20-24 | 1.55 [ 1.53, 1.58] |
| 25-29 | 1.17 [ 1.16, 1.19] |
| 30-34 | Ref                |
| 35-39 | 0.98 [ 0.96, 1.00] |
| 40-44 | 1.13 [ 1.10, 1.17] |
| 45-49 | 1.86 [ 1.64, 2.10] |

**BMI (in kg/m<sup>2</sup>)**

|                           |                    |
|---------------------------|--------------------|
| Underweight (<18.5)       | 1.08 [ 1.05, 1.11] |
| Normal weight (18.5-24.9) | Ref                |
| Overweight (25-29.9)      | 1.16 [ 1.14, 1.18] |
| Obese (>30)               | 1.55 [ 1.53, 1.57] |
| Missing                   | 1.01 [ 1.00, 1.03] |

**Country**

|                  |                    |
|------------------|--------------------|
| England          | Ref                |
| Northern Ireland | 2.09 [ 2.05, 2.14] |
| Scotland         | 1.58 [ 1.56, 1.60] |
| Wales            | 1.40 [ 1.38, 1.42] |

**Ethnicity**

|                        |                    |
|------------------------|--------------------|
| White                  | Ref                |
| Black                  | 1.71 [ 1.66, 1.77] |
| South Asian            | 2.40 [ 2.33, 2.47] |
| Mixed race             | 1.39 [ 1.30, 1.49] |
| Other race             | 1.41 [ 1.35, 1.47] |
| Ethnicity data missing | 1.00 [ 0.99, 1.01] |

**Gravidity**

|    |                    |
|----|--------------------|
| 1  | Ref                |
| 2  | 1.02 [ 1.01, 1.04] |
| 3  | 1.08 [ 1.07, 1.10] |
| 4  | 1.13 [ 1.11, 1.15] |
| 5+ | 1.26 [ 1.24, 1.29] |

**IMD**

|                    |                    |
|--------------------|--------------------|
| 1 (most deprived)  | 1.56 [ 1.54, 1.59] |
| 2                  | 1.40 [ 1.38, 1.43] |
| 3                  | 1.25 [ 1.23, 1.28] |
| 4                  | 1.16 [ 1.14, 1.18] |
| 5 (least deprived) | Ref                |

**Number of morbidities**

|    |                     |
|----|---------------------|
| 0  | Ref                 |
| 1  | 1.70 [ 1.68, 1.73]  |
| 2  | 2.59 [ 2.55, 2.63]  |
| 3  | 3.60 [ 3.54, 3.66]  |
| 4  | 4.94 [ 4.83, 5.05]  |
| 5  | 6.57 [ 6.36, 6.78]  |
| 6+ | 9.78 [ 9.44, 10.13] |

**Smoking Status**

|                        |                    |
|------------------------|--------------------|
| Non-Smoker             | Ref                |
| Ex-Smoker              | 1.05 [ 1.04, 1.07] |
| Smoker                 | 1.19 [ 1.18, 1.20] |
| Smoking status missing | 0.70 [ 0.69, 0.72] |

0.10 1.00 10.00
