# Supplementary material for: Polypharmacy during pregnancy and associated risk factors: a retrospective analysis of 577 medication exposures among 1.5 million pregnancies in the UK, 2000-2019
Source: Springer Nature journal article supplement (doi:10.1186/s12916-022-02722-5), 2023-01-16
Supplement: MOESM9 [file 23925810]

## Risk Factors

Adj. OR (95% CI)

### Age (in years)

|       |                    |
|-------|--------------------|
| 15-19 | 1.83 [ 1.80, 1.87] |
| 20-24 | 1.34 [ 1.32, 1.36] |
| 25-29 | 1.10 [ 1.09, 1.12] |
| 30-34 | Ref                |
| 35-39 | 1.00 [ 0.99, 1.02] |
| 40-44 | 1.11 [ 1.08, 1.15] |
| 45-49 | 1.49 [ 1.30, 1.71] |

### BMI (in kg/m<sup>2</sup>)

|                           |                    |
|---------------------------|--------------------|
| Underweight (<18.5)       | 1.02 [ 1.00, 1.05] |
| Normal weight (18.5-24.9) | Ref                |
| Overweight (25-29.9)      | 1.13 [ 1.12, 1.15] |
| Obese (>30)               | 1.32 [ 1.30, 1.34] |
| Missing                   | 0.97 [ 0.96, 0.98] |

### Country

|                  |                    |
|------------------|--------------------|
| England          | Ref                |
| Northern Ireland | 2.10 [ 2.05, 2.15] |
| Scotland         | 1.34 [ 1.32, 1.36] |
| Wales            | 1.06 [ 1.05, 1.08] |

### Ethnicity

|                        |                    |
|------------------------|--------------------|
| White                  | Ref                |
| Black                  | 1.70 [ 1.65, 1.76] |
| South Asian            | 2.25 [ 2.18, 2.32] |
| Mixed race             | 1.24 [ 1.16, 1.32] |
| Other race             | 1.32 [ 1.27, 1.37] |
| Ethnicity data missing | 1.09 [ 1.08, 1.10] |

### Gravidity

|    |                    |
|----|--------------------|
| 1  | Ref                |
| 2  | 1.09 [ 1.08, 1.10] |
| 3  | 1.16 [ 1.15, 1.18] |
| 4  | 1.22 [ 1.20, 1.25] |
| 5+ | 1.33 [ 1.31, 1.35] |

### IMD

|                    |                    |
|--------------------|--------------------|
| 1 (most deprived)  | 1.33 [ 1.31, 1.35] |
| 2                  | 1.28 [ 1.26, 1.30] |
| 3                  | 1.18 [ 1.16, 1.20] |
| 4                  | 1.14 [ 1.13, 1.16] |
| 5 (least deprived) | Ref                |

### Number of morbidities

|    |                    |
|----|--------------------|
| 0  | Ref                |
| 1  | 1.61 [ 1.59, 1.63] |
| 2  | 2.34 [ 2.31, 2.37] |
| 3  | 3.18 [ 3.13, 3.24] |
| 4  | 4.16 [ 4.05, 4.27] |
| 5  | 5.64 [ 5.42, 5.87] |
| 6+ | 7.99 [ 7.58, 8.42] |

### Smoking Status

|                        |                    |
|------------------------|--------------------|
| Non-Smoker             | Ref                |
| Ex-Smoker              | 1.06 [ 1.05, 1.08] |
| Smoker                 | 1.13 [ 1.12, 1.15] |
| Smoking status missing | 0.69 [ 0.68, 0.71] |

0.10 1.00 10.00
