# Supplementary material for: Polypharmacy during pregnancy and associated risk factors: a retrospective analysis of 577 medication exposures among 1.5 million pregnancies in the UK, 2000-2019
Source: BMC Med. 2023 Jan 16;21:21. doi: 10.1186/s12916-022-02722-5 (PMC9843951; doi:10.1186/s12916-022-02722-5)
Supplement: Supplementary file 5 — Additional file 5: Table S2. Proportions of pregnancies with a prescribed medication – sensitivity analysis. [file 12916_2022_2722_MOESM5_ESM.xlsx]

## Sheet: Trimester1
Medication category (BNF chapter and section)	Description	All Pregnancies			Pregnancies of women with active multimorbidity
		Numerator	Denominator	Estimated prescription percentage	Numerator	Denominator	Estimated prescription percentage
05010103	Broad-Spectrum Penicillins	84813	1521317	5.57497	22740	273975	8.30003
06040103	Progestogen Products Doubling (In House Use)	70931	1521317	4.66247	13000	273975	4.74496
04030300	Selective Serotonin Re-Uptake Inhibitors (SSRI)	67528	1521317	4.43879	42523	273975	15.5208
04070100	Non-Opioid And Compound Analgesics	63522	1521317	4.17546	23389	273975	8.53691
07020250	Preparations For Vaginal And Vulval Candidiasis	55230	1521317	3.63041	14656	273975	5.34939
03010101	Selective Beta 2 Agonists	53552	1521317	3.52011	27069	273975	9.8801
09010101	Oral Iron	47500	1521317	3.12229	10704	273975	3.90693
13040000	Topical Corticosteroids	43956	1521317	2.88934	14762	273975	5.38808
01010201	Compound Alginate Preparations	40650	1521317	2.67203	11625	273975	4.24309
05010201	Cephalosporins	31723	1521317	2.08523	8035	273975	2.93275
04060000	Products Used Against Nausea And Vertigo	30680	1521317	2.01667	9141	273975	3.33644
01060400	Osmotic Laxatives	29914	1521317	1.96632	9504	273975	3.46893
10010100	Non-Steroidal Anti-Inflammatory Drugs	25991	1521317	1.70845	8268	273975	3.01779
06020100	Thyroid Hormones	24982	1521317	1.64213	14581	273975	5.32202
03020000	Corticosteroids (For Respiratory Conditions)	22468	1521317	1.47688	11041	273975	4.02993
01030500	Proton Pump Inhibitors	21416	1521317	1.40773	10188	273975	3.71859
04020101	First-Generation Antipsychotic Drugs	20545	1521317	1.35047	6209	273975	2.26627
12020101	Corticosteroids Used In Nasal Allergy	20166	1521317	1.32556	8673	273975	3.16562
03040101	Non-Sedating Antihistamines	20154	1521317	1.32477	8645	273975	3.1554
04065400	Products Used Against Nausea And Vertigo - Antihistamines	18915	1521317	1.24333	5291	273975	1.9312
13020102	Emollient Skin Preparations	18167	1521317	1.19416	6564	273975	2.39584
05010500	Macrolides	17849	1521317	1.17326	5525	273975	2.01661
05010800	Sulphonamides And Trimethoprim	17677	1521317	1.16195	4710	273975	1.71913
05010101	Benzylpenicillin And Phenoxymethylpenicillin	17586	1521317	1.15597	3789	273975	1.38297
05010102	Penicillinase-Resistant Penicillins	17120	1521317	1.12534	4708	273975	1.71841
05011300	Urinary-Tract Infections	16408	1521317	1.07854	4738	273975	1.72935
04065500	Products Used Against Nausea And Vertigo - Domperidone & Metoclopramide	14733	1521317	0.968437	4477	273975	1.63409
04010100	Hypnotics	14693	1521317	0.965808	7305	273975	2.6663
02090000	Antiplatelet Products	14635	1521317	0.961995	5189	273975	1.89397
04105100	Substance Dependence - Nicotine Dependence	13250	1521317	0.870956	3939	273975	1.43772
02040000	Beta-Adrenoceptor Blockers	12860	1521317	0.84532	6979	273975	2.54731
06040102	Progestogens And Progesterone Receptor Modulators	12529	1521317	0.823563	3870	273975	1.41254
05011100	Metronidazole And Tinidazole	12285	1521317	0.807524	3262	273975	1.19062
04030100	Tricyclic And Related Antidepressants	11628	1521317	0.764338	7184	273975	2.62214
04070200	Opioid Analgesics	11440	1521317	0.75198	6820	273975	2.48928
04030400	Other Antidepressants	10880	1521317	0.71517	8434	273975	3.07838
04010201	Benzodiazepines	10106	1521317	0.664293	6423	273975	2.34437
03040102	Sedating Antihistamines	9811	1521317	0.644902	3380	273975	1.23369
11030100	Antibacterials (In Eye Preparation)	9444	1521317	0.620778	2250	273975	0.821243
13020100	Emollients	8858	1521317	0.582259	3068	273975	1.11981
05010300	Tetracyclines	8660	1521317	0.569244	2766	273975	1.00958
11040200	Other Anti-Inflammatory Eye Preparations (For The Eye)	8646	1521317	0.568323	3111	273975	1.13551
01060100	Bulk-Forming Laxatives	8584	1521317	0.564248	2787	273975	1.01725
01070200	Compound Haemorrhoid Products With Corticosteroids	8297	1521317	0.545383	2202	273975	0.803723
09060400	Vitamin D	8088	1521317	0.531645	2764	273975	1.00885
01050200	Corticosteroids In Chronic Bowel Problems	7939	1521317	0.52185	4238	273975	1.54686
01040200	Antimotility Products	7581	1521317	0.498318	3373	273975	1.23113
01020200	Other Antispasmodics	7415	1521317	0.487407	3109	273975	1.13478
01030100	H2-Receptor Antagonists	7243	1521317	0.476101	2789	273975	1.01798
13100101	Antibacterial Preparations Only Used Topically	7230	1521317	0.475246	2098	273975	0.765763
06010202	Biguanides (Metformin)	6931	1521317	0.455592	4218	273975	1.53956
13060102	Topical Antibacterials For Acne	6691	1521317	0.439816	1690	273975	0.616845
13020101	Emollient Bath Additives And Shower Preparations	6469	1521317	0.425224	2847	273975	1.03915
03010000	Bronchodilators	5776	1521317	0.379671	2866	273975	1.04608
04070401	Acute Migraine	5720	1521317	0.37599	2914	273975	1.0636
05020100	Triazole Antifungals	5667	1521317	0.372506	1850	273975	0.675244
06010102	Intermediate- And Long-Acting Insulins	5422	1521317	0.356402	3860	273975	1.40889
06010101	Short-Acting Insulins	5354	1521317	0.351932	3894	273975	1.4213
09060700	Multivitamin And Multimineral Preparations	5193	1521317	0.341349	1545	273975	0.56392
01060200	Stimulant Laxatives	5108	1521317	0.335762	2049	273975	0.747878
12010151	Anti-Inflammatory Preparations	5028	1521317	0.330503	1523	273975	0.55589
09010200	Drugs Used In Megaloblastic Anaemias	4445	1521317	0.292181	1959	273975	0.715029
04020100	Antipsychotic Products	4185	1521317	0.275091	1026	273975	0.374487
04080100	Control Of Epilepsy	4096	1521317	0.26924	2360	273975	0.861392
13040200	Mild Topical Corticosteroids	4009	1521317	0.263522	1045	273975	0.381422
04020102	Second-Generation Antipsychotic Drugs	3850	1521317	0.25307	3357	273975	1.22529
12030100	Drugs For Oral Ulceration And Inflammation	3749	1521317	0.246431	1046	273975	0.381787
02080100	Parenteral Anticoagulants	3665	1521317	0.24091	1563	273975	0.57049
13090000	Shampoos And Other Preparations For Scalp And Hair Conditions	3610	1521317	0.237294	1391	273975	0.507711
13100200	Antifungal Preparations (Topical	3605	1521317	0.236966	947	273975	0.345652
13020103	Antimicrobial Emollients	3536	1521317	0.23243	1365	273975	0.498221
10030250	Topical Nsaids And Counter Irritants	3500	1521317	0.230064	1241	273975	0.452961
04065600	Products Used Against Nausea And Vertigo - 5 HT3 Antagonists	3484	1521317	0.229012	1179	273975	0.430331
05030201	Herpes Simplex And Varicella-Zoster Infection	3289	1521317	0.216194	1012	273975	0.369377
13060100	Topical Preparations For Acne	3221	1521317	0.211724	895	273975	0.326672
04020000	Products Used In Psychoses And Related Disorders	3137	1521317	0.206203	1759	273975	0.642029
13100300	Antiviral Preparations (Topical	3081	1521317	0.202522	984	273975	0.359157
01050100	Aminosalicylates	2944	1521317	0.193517	1539	273975	0.56173
13100400	Parasiticidal Preparations (Topical)	2910	1521317	0.191282	700	273975	0.255498
09020102	Oral Sodium And Water	2898	1521317	0.190493	654	273975	0.238708
01070000	Local Products For Anal Or Rectal Problems	2787	1521317	0.183197	747	273975	0.272653
02110000	Antifibrinolytic Products And Haemostatics	2682	1521317	0.176295	933	273975	0.340542
01010101	Aluminium- And Magnesium- Containing Antacids	2605	1521317	0.171233	659	273975	0.240533
07030100	Combined Hormonal Contraceptives	2531	1521317	0.166369	472	273975	0.172278
14040200	Vaccines And Antisera - Influenza Vaccines	2525	1521317	0.165975	739	273975	0.269733
05011200	Quinolones	2497	1521317	0.164134	807	273975	0.294552
02050200	Centrally Acting Antihypertensive Products	2407	1521317	0.158218	1342	273975	0.489826
07030201	Oral Progestogen-Only Contraceptives	2348	1521317	0.15434	444	273975	0.162059
06040101	Oestrogens And HRT	2331	1521317	0.153223	866	273975	0.316087
02060200	Calcium-Channel Blockers	2323	1521317	0.152697	1388	273975	0.506616
15020000	Local Anaesthesia	2215	1521317	0.145598	674	273975	0.246008
09050101	Calcium Supplements	2208	1521317	0.145137	845	273975	0.308422
11080100	Tear Deficiency	2179	1521317	0.143231	926	273975	0.337987
13060101	Benzoyl Peroxide And Azelaic Acid For Acne	2126	1521317	0.139747	526	273975	0.191988
07020251	Preparations For Other Vaginal Infections	2079	1521317	0.136658	610	273975	0.222648
13030000	Topical Local Anaesthetics And Antipruritics	2063	1521317	0.135606	624	273975	0.227758
02050501	Angiotensin-Converting Enzyme Inhibitors (ACE Inhibitors)	2053	1521317	0.134949	1460	273975	0.532895
12010100	Drugs Acting On The Ear - Otitis Externa	2038	1521317	0.133963	520	273975	0.189798
06040104	Selective Estrogen Receptor Modulators (Serms)	2025	1521317	0.133108	775	273975	0.282873
13090100	Shampoos And Other Scalp Preparations	2018	1521317	0.132648	901	273975	0.328862
71580200	Emollient Ointment	1960	1521317	0.128836	769	273975	0.280683
04050100	Anti-Obesity Products Acting On The Gastro-Intestinal Tract	1956	1521317	0.128573	907	273975	0.331052
09020100	Oral Preparations For Fluid And Electrolyte Imbalance	1904	1521317	0.125155	546	273975	0.199288
14040800	Vaccines And Antisera - Diphtheria Vaccines	1859	1521317	0.122197	370	273975	0.135049
12010300	Drugs Acting On The Ear - Removal Of Ear Wax	1858	1521317	0.122131	456	273975	0.166439
03030200	Leukotriene Receptor Antagonists	1759	1521317	0.115624	1255	273975	0.458071
01020100	Antimuscarinics	1755	1521317	0.115361	698	273975	0.254768
13050200	Preparations For Psoriasis	1689	1521317	0.111022	718	273975	0.262068
03090200	Demulcent And Expectorant Cough Preparations	1666	1521317	0.10951	420	273975	0.153299
01020000	Antispasmodics And Products Affecting Motility	1632	1521317	0.107275	753	273975	0.274843
04070300	Neuropathic Pain	1614	1521317	0.106092	1152	273975	0.420476
12020300	Nasal Preparations For Infection	1573	1521317	0.103397	494	273975	0.180308
03090100	Cough Suppressants	1563	1521317	0.10274	395	273975	0.144174
13040100	Topical Corticosteroids With Antimicrobials	1538	1521317	0.101097	495	273975	0.180673
01050300	Products Affecting The Immune Response In Chronic Bowel Problems	1523	1521317	0.100111	961	273975	0.350762
04070402	Prophylaxis Of Migraine	1501	1521317	0.0986645	943	273975	0.344192
06010400	Treatment Of Hypoglycaemia	1437	1521317	0.0944576	1058	273975	0.386167
11040100	Corticosteroids (In Eye Preparations)	1398	1521317	0.0918941	521	273975	0.190163
13070000	Preparations For Warts And Calluses	1395	1521317	0.0916969	315	273975	0.114974
01070100	Soothing Haemorrhoid Products	1364	1521317	0.0896592	371	273975	0.135414
06020200	Antithyroid Products	1361	1521317	0.089462	671	273975	0.244913
04030000	Antidepressants	1360	1521317	0.0893962	1100	273975	0.401496
09060200	Vitamin B Group	1322	1521317	0.0868984	689	273975	0.251483
13100102	Antibacterial Preparations Also Used Systemically (For Skin Conditions)	1263	1521317	0.0830202	457	273975	0.166804
02020100	Thiazides And Related Diuretics	1260	1521317	0.082823	774	273975	0.282508
02120400	Statins	1250	1521317	0.0821657	943	273975	0.344192
03100000	Systemic Nasal Decongestants	1111	1521317	0.0730288	324	273975	0.118259
04020300	Products Used For Mania And Hypomania	1110	1521317	0.0729631	725	273975	0.264623
07040250	Urinary Incontinence	1039	1521317	0.0682961	563	273975	0.205493
01010000	Indigestion And GORD (Gastro-Oesophageal Reflux Disease)	1001	1521317	0.0657983	300	273975	0.109499
13060103	Topical Retinoids And Related Preparations For Acne	946	1521317	0.062183	265	273975	0.0967242
07030202	Parenteral Progestogen-Only Contraceptives	937	1521317	0.0615914	168	273975	0.0613195
13040400	Potent Topical Corticosteroids	932	1521317	0.0612627	319	273975	0.116434
14040500	Vaccines And Antisera - Hepatitis A Vaccine	902	1521317	0.0592907	170	273975	0.0620495
05050100	Products For Threadworms	885	1521317	0.0581733	220	273975	0.0802993
14040000	Immunological Products And Vaccines - Vaccines And Antisera	795	1521317	0.0522574	148	273975	0.0540195
71580100	Emollient Cream	754	1521317	0.0495623	304	273975	0.110959
12020250	Sympathomimetics (Nasal Decongestants)	724	1521317	0.0475903	217	273975	0.0792043
07020100	Preparations For Vaginal And Vulval Changes	696	1521317	0.0457498	194	273975	0.0708094
04066000	Other Products For Meniere Disease	694	1521317	0.0456184	273	273975	0.0996441
02030203	Ventricular Arrhythmias	686	1521317	0.0450925	146	273975	0.0532895
06030200	Glucocorticoid Therapy	685	1521317	0.0450268	338	273975	0.123369
14041100	Vaccines And Antisera - Typhoid Vaccine	677	1521317	0.0445009	126	273975	0.0459896
05020000	Antifungals	669	1521317	0.0439751	213	273975	0.0777443
07030450	Intrauterine Contraceptive Devices	665	1521317	0.0437121	144	273975	0.0525595
10010300	Drugs That Suppress The Rheumatic Disease Process	658	1521317	0.043252	418	273975	0.152569
13050202	Topical Preparations For Psoriasis	617	1521317	0.040557	284	273975	0.103659
02020200	Loop Diuretics	602	1521317	0.039571	345	273975	0.125924
05020500	Other Antifungals	599	1521317	0.0393738	144	273975	0.0525595
02050502	Angiotensin-II Receptor Antagonists	563	1521317	0.0370074	398	273975	0.145269
02080200	Oral Anticoagulants	559	1521317	0.0367445	378	273975	0.137969
13050000	Preparations For Eczema And Psoriasis	540	1521317	0.0354956	267	273975	0.0974541
07020200	Vaginal And Vulval Infections	528	1521317	0.0347068	140	273975	0.0510996
12500200	Nasal Spray	519	1521317	0.0341152	211	273975	0.0770143
05040100	Antimalarials	508	1521317	0.0333921	85	273975	0.0310247
12030200	Oropharyngeal Anti-Infective Drugs	503	1521317	0.0330635	167	273975	0.0609545
14040600	Vaccines And Antisera - Hepatitis A Vaccine With Typhoid Vaccine	489	1521317	0.0321432	87	273975	0.0317547
04090100	Dopaminergic Drugs Used In Parkinson's Disease/Dystonias	473	1521317	0.0310915	225	273975	0.0821243
06070100	Bromocriptine And Other Dopaminergic Drugs	470	1521317	0.0308943	260	273975	0.0948992
01060300	Faecal Softeners	460	1521317	0.030237	234	273975	0.0854093
03010200	Antimuscarinic Bronchodilators	454	1521317	0.0298426	367	273975	0.133954
05030400	Influenza	433	1521317	0.0284622	124	273975	0.0452596
13060104	Other Topical Preparations For Acne	432	1521317	0.0283964	119	273975	0.0434346
03010300	Theophylline	414	1521317	0.0272133	299	273975	0.109134
13020200	Barrier Preparations	405	1521317	0.0266217	165	273975	0.0602245
01020300	Motility Stimulants	388	1521317	0.0255042	80	273975	0.0291997
06010151	Biphasic Insulins	382	1521317	0.0251098	232	273975	0.0846793
12020151	Cromoglicate In Nasal Allergy	369	1521317	0.0242553	106	273975	0.0386897
06010201	Sulphonylureas	357	1521317	0.0234665	268	273975	0.0978191
12020301	Nasal Staphylococci	351	1521317	0.0230721	114	273975	0.0416096
04040000	CNS Stimulants And Products Used For Attention Deficit Hyperactivity Disorder (ADHD)	345	1521317	0.0226777	209	273975	0.0762843
01070400	Anal Fissure Management	344	1521317	0.022612	100	273975	0.0364997
04010200	Anxiolytics	343	1521317	0.0225463	232	273975	0.0846793
07030550	Hormonal Methods	338	1521317	0.0222176	111	273975	0.0405146
04080200	Products Used In Status Epilepticus	335	1521317	0.0220204	150	273975	0.0547495
10020202	Other Muscle Relaxants	327	1521317	0.0214945	146	273975	0.0532895
12020200	Topical Nasal Decongestants	294	1521317	0.0193254	92	273975	0.0335797
13040300	Moderate Topical Corticosteroids	284	1521317	0.018668	107	273975	0.0390547
10020200	Skeletal Muscle Relaxants	279	1521317	0.0183394	200	273975	0.0729994
13050300	Drugs Affecting The Immune Response For Eczema And Psoriasis	279	1521317	0.0183394	163	273975	0.0594945
07030152	Combined Hormonal Contraceptives - Standard Strength (Oral)	270	1521317	0.0177478	34	273975	0.0124099
13070100	Anogenital Warts	252	1521317	0.0165646	76	273975	0.0277398
03010400	Compound Bronchodilator Products	251	1521317	0.0164989	185	273975	0.0675244
10030100	Enzymes (In Relief Of Soft-Tissue Inflammation)	246	1521317	0.0161702	70	273975	0.0255498
08020200	Corticosteroids And Other Immunosuppressants	229	1521317	0.0150527	181	273975	0.0660644
10030251	Rubefacients And Other Topical Antirheumatics - Capsaicin	229	1521317	0.0150527	116	273975	0.0423396
13090200	Hirsutism	228	1521317	0.014987	118	273975	0.0430696
12030300	Lozenges	227	1521317	0.0149213	63	273975	0.0229948
13130000	Topical Circulatory Preparations	225	1521317	0.0147898	60	273975	0.0218998
04105000	Substance Dependence - Alcohol Dependence	224	1521317	0.0147241	200	273975	0.0729994
12020150	Antihistamines In Nasal Allergy	210	1521317	0.0138038	77	273975	0.0281048
07030150	Combined Hormonal Contraceptives - Low Strength (Oral)	201	1521317	0.0132122	30	273975	0.0109499
05010105	Mecillinams	200	1521317	0.0131465	65	273975	0.0237248
02050400	Alpha-Adrenoceptor Blockers	188	1521317	0.0123577	136	273975	0.0496396
06060200	Bisphosphonates And Other Drugs Affecting Bone Metabolism	185	1521317	0.0121605	139	273975	0.0507346
06050200	Posterior Pituitary Hormones And Antagonists	184	1521317	0.0120948	98	273975	0.0357697
09060300	Vitamin C	180	1521317	0.0118319	54	273975	0.0197098
01010103	Antacid Preparations Containing Simeticone Or Local Anaesthetics	179	1521317	0.0117661	49	273975	0.0178848
04090200	Antimuscarinic Drugs Used In Parkinsonism/Dystonias	173	1521317	0.0113717	141	273975	0.0514646
07040350	Alkalinisation Of Urine	171	1521317	0.0112403	38	273975	0.0138699
06010500	Treatment Of Diabetic Nephropathy And Neuropathy	167	1521317	0.0109773	66	273975	0.0240898
06070200	Drugs Affecting Gonadotrophins	160	1521317	0.0105172	59	273975	0.0215348
05010600	Clindamycin	157	1521317	0.01032	72	273975	0.0262798
05040101	Treatment Of Malaria	156	1521317	0.0102543	107	273975	0.0390547
02060100	Nitrates	153	1521317	0.0100571	80	273975	0.0291997
12020100	Drugs Used In Nasal Allergy	150	1521317	0.00985988	45	273975	0.0164249
10010202	Local Corticosteroid Injections	141	1521317	0.00926829	59	273975	0.0215348
11065000	Beta-Blockers (In Glaucoma)	137	1521317	0.00900536	66	273975	0.0240898
13500200	Emollient Cream	135	1521317	0.00887389	60	273975	0.0218998
06070250	Gonadorelin Analogues	133	1521317	0.00874243	62	273975	0.0226298
01090200	Bile Acid Sequestrants	132	1521317	0.00867669	83	273975	0.0302947
02020300	Potassium-Sparing Diuretics And Aldosterone Antagonists	131	1521317	0.00861096	92	273975	0.0335797
13020000	Emollient And Barrier Preparations	131	1521317	0.00861096	60	273975	0.0218998
06030100	Replacement Corticosteroids For Endocrine Conditions	128	1521317	0.00841376	63	273975	0.0229948
01010100	Antacids And Simeticone	127	1521317	0.00834803	33	273975	0.0120449
03070000	Mucolytics	127	1521317	0.00834803	80	273975	0.0291997
01020400	Compounds Preparations	125	1521317	0.00821656	37	273975	0.0135049
11065100	Prostaglandin Analogues (In Glaucoma)	124	1521317	0.00815083	59	273975	0.0215348
12010152	Anti-Infective Preparations	124	1521317	0.00815083	42	273975	0.0153299
71860000	Emollient And Barrier Preparations	122	1521317	0.00801937	56	273975	0.0204398
13500000	Miscellaneous Skin Preparations	119	1521317	0.00782217	48	273975	0.0175198
14040400	Vaccines And Antisera - Hepatitis B Vaccine	118	1521317	0.00775644	30	273975	0.0109499
03080000	Aromatic Inhalations	117	1521317	0.0076907	32	273975	0.0116799
01090401	Pancreatin	114	1521317	0.00749351	85	273975	0.0310247
05020300	Polyene Antifungals	113	1521317	0.00742777	34	273975	0.0124099
13000000	Skin	112	1521317	0.00736204	32	273975	0.0116799
71560000	Oral Film Forming Agent	107	1521317	0.00703338	31	273975	0.0113149
12020251	Antimuscarinic (Nasal Decongestants)	104	1521317	0.00683618	35	273975	0.0127749
01090100	Products Affecting Bile Composition And Flow	102	1521317	0.00670472	57	273975	0.0208048
07030300	Spermicidal Contraceptives	101	1521317	0.00663898	26	273975	0.00948992
13040500	Very Potent Topical Corticosteroids	100	1521317	0.00657325	39	273975	0.0142349
06010204	Dipeptidyl Peptidase 4 Inhibitors (DPP 4 Inhibitors	99	1521317	0.00650752	75	273975	0.0273748
71520100	Vaginal Moisturiser	95	1521317	0.00624459	42	273975	0.0153299
09060750	-	94	1521317	0.00617886	27	273975	0.00985491
09040153	Nutritional Supplements For Metabolic Disease	92	1521317	0.00604739	27	273975	0.00985491
14040100	Vaccines And Antisera - Human Papilloma Virus	92	1521317	0.00604739	11	273975	0.00401496
01010102	Aluminium-Magnesium Complexes	91	1521317	0.00598166	29	273975	0.0105849
07020000	Treatment Of Vaginal And Vulval Conditions	91	1521317	0.00598166	32	273975	0.0116799
05010900	Antituberculosis Drugs	90	1521317	0.00591593	28	273975	0.0102199
09020101	Oral Potassium	90	1521317	0.00591593	49	273975	0.0178848
11030300	Antivirals (In Eye Preparations)	88	1521317	0.00578446	32	273975	0.0116799
09060600	Vitamin K	87	1521317	0.00571873	30	273975	0.0109499
02020700	Carbonic Anhydrase Inhibitors	86	1521317	0.005653	61	273975	0.0222648
07010300	Myometrial Relaxants	86	1521317	0.005653	34	273975	0.0124099
02080201	Novel Oral Anticoagulants (Noacs)	85	1521317	0.00558726	64	273975	0.0233598
06010207	Thiazolidinedione (Glitazones)	84	1521317	0.00552153	70	273975	0.0255498
14040700	Vaccines And Antisera - Pneumococcal Vaccine	77	1521317	0.0050614	48	273975	0.0175198
50030000	Extemporaneous Item	77	1521317	0.0050614	26	273975	0.00948992
08030402	Prostate Cancer	75	1521317	0.00492994	41	273975	0.0149649
02030200	Products For Arrhythmias	74	1521317	0.00486421	33	273975	0.0120449
72214500	Silicone Topical Gel	74	1521317	0.00486421	24	273975	0.00875992
01060800	Other Products Used In Constipation	73	1521317	0.00479847	45	273975	0.0164249
02030201	Supraventricular & Ventricular Arrhythmias	70	1521317	0.00460128	34	273975	0.0124099
04105200	Substance Dependence - Opioid Dependence	69	1521317	0.00453554	50	273975	0.0182498
02100200	Fibrinolytic Products	66	1521317	0.00433835	23	273975	0.00839493
11065300	Carbonic Anhydrase Inhibitors And Systemic Drugs (In Glaucoma)	64	1521317	0.00420688	43	273975	0.0156949
13110700	Preparations For The Promotion Of Wound Healing	64	1521317	0.00420688	28	273975	0.0102199
11050100	Antimuscarinics	63	1521317	0.00414115	31	273975	0.0113149
06050100	Hypothalamic And Anterior Pituitary Hormones And Anti-Oestrogens	62	1521317	0.00407542	23	273975	0.00839493
10010451	Long-Term Control Of Gout	59	1521317	0.00387822	39	273975	0.0142349
02020400	Potassium-Sparing Diuretics With Other Diuretics	58	1521317	0.00381249	33	273975	0.0120449
04065900	Products Used Against Nausea And Vertigo - Hyoscine	57	1521317	0.00374675	23	273975	0.00839493
06010206	Glucagon-Like Peptide-1 Receptor Agonists ( GLP-1 Receptor Agonists	53	1521317	0.00348382	45	273975	0.0164249
06050152	Anterior Pituitary Hormones - Gonadotrophins	53	1521317	0.00348382	11	273975	0.00401496
01010104	Simeticone Alone	52	1521317	0.00341809	12	273975	0.00437996
71580300	Emollient Preparation Containing Urea	51	1521317	0.00335236	34	273975	0.0124099
14040300	Vaccines And Antisera - Meningococcal Vaccines	48	1521317	0.00315516	9	273975	0.00328497
01040100	Adsorbents And Bulk-Forming Products	46	1521317	0.0030237	14	273975	0.00510996
09060500	Vitamin E	46	1521317	0.0030237	28	273975	0.0102199
06010205	SGLT2 Inhibitors (Gliflozins)	44	1521317	0.00289223	39	273975	0.0142349
07020150	Oestrogens	44	1521317	0.00289223	16	273975	0.00583995
01060500	Bowel Cleansing Solutions	43	1521317	0.0028265	23	273975	0.00839493
04080102	Phenobarbital And Primidone	40	1521317	0.0026293	18	273975	0.00656994
10010450	Acute Attacks Of Gout	39	1521317	0.00256357	12	273975	0.00437996
71590900	Artificial Eye Lubricant	39	1521317	0.00256357	22	273975	0.00802993
09060100	Vitamin A	38	1521317	0.00249784	21	273975	0.00766493
71110100	Intrauterine Contraceptive Device	38	1521317	0.00249784	6	273975	0.00218998
10010500	Other Drugs For Rheumatic Diseases	37	1521317	0.0024321	15	273975	0.00547495
01010200	Compound Alginates And Proprietary Indigestion Preparations	36	1521317	0.00236637	17	273975	0.00620495
02120300	Fibrates	36	1521317	0.00236637	29	273975	0.0105849
06050153	Human Menopausal Gonadotrophins	36	1521317	0.00236637	11	273975	0.00401496
14050300	Anti-D (RHO) Immunoglobulin	36	1521317	0.00236637	12	273975	0.00437996
05010701	Polymyxins	35	1521317	0.00230064	24	273975	0.00875992
08020100	Antiproliferative Immunosuppressants	35	1521317	0.00230064	30	273975	0.0109499
13050100	Preparations For Eczema	35	1521317	0.00230064	11	273975	0.00401496
02120200	Ezetimibe	34	1521317	0.00223491	25	273975	0.00912492
06060000	Products Affecting Bone Metabolism	34	1521317	0.00223491	15	273975	0.00547495
09020103	Oral Bicarbonate	34	1521317	0.00223491	27	273975	0.00985491
02120600	Omega-3 Fatty Acid Compounds	33	1521317	0.00216917	20	273975	0.00729994
07040200	Drugs For Urinary Frequency	33	1521317	0.00216917	15	273975	0.00547495
01030300	Chelates And Complexes	32	1521317	0.00210344	22	273975	0.00802993
03040103	Antihistamines Used For Nausea And Vomiting	31	1521317	0.00203771	7	273975	0.00255498
13080150	Treatment Of Photodamage	31	1521317	0.00203771	3	273975	0.00109499
14050204	Disease-Specific Immunoglobulins - Varicella Zoster	31	1521317	0.00203771	7	273975	0.00255498
02060300	Other Anti-Angina Products	30	1521317	0.00197198	22	273975	0.00802993
09050300	Fluoride	30	1521317	0.00197198	23	273975	0.00839493
09050400	Zinc	30	1521317	0.00197198	20	273975	0.00729994
07040251	Nocturnal Enuresis	28	1521317	0.00184051	7	273975	0.00255498
01030800	Helicobacter Pylori Eradication	26	1521317	0.00170905	7	273975	0.00255498
03095000	Miscellaneous Cough & Cold Preparations	26	1521317	0.00170905	9	273975	0.00328497
10010302	Drugs Affecting The Immune Response In Rheumatic Disease	25	1521317	0.00164331	18	273975	0.00656994
02010100	Cardiac Glycosides	24	1521317	0.00157758	18	273975	0.00656994
04030201	Reversible Monoamine-Oxidase Inhibitors	24	1521317	0.00157758	24	273975	0.00875992
11065200	Sympathomimetics (In Glaucoma)	24	1521317	0.00157758	16	273975	0.00583995
02060400	Peripheral Vasodilators And Related Products	23	1521317	0.00151185	15	273975	0.00547495
05011000	Antileprotic Drugs	23	1521317	0.00151185	11	273975	0.00401496
08030401	Breast Cancer	22	1521317	0.00144612	13	273975	0.00474496
72045000	Zinc Paste Bandage	21	1521317	0.00138038	12	273975	0.00437996
07040300	Drugs Used In Urological Pain	19	1521317	0.00124892	6	273975	0.00218998
05010700	Other Antibacterials	18	1521317	0.00118319	7	273975	0.00255498
71590700	Eye Drop Sodium Hyaluronate And Dexpanthenol Preservative Free	18	1521317	0.00118319	10	273975	0.00364997
02050504	Angiotensin-II Receptor Antagonists With Diuretic	17	1521317	0.00111745	14	273975	0.00510996
09050201	Phosphate Supplements	17	1521317	0.00111745	6	273975	0.00218998
04090300	Drugs For Essential Tremor	16	1521317	0.00105172	13	273975	0.00474496
06050101	Anterior Pituitary Hormones - Growth Hormone	16	1521317	0.00105172	12	273975	0.00437996
13060300	Topical Preparations For Rosacea	15	1521317	0.000985988	11	273975	0.00401496
72045200	Zinc Paste And Ichthammol Bandage	15	1521317	0.000985988	9	273975	0.00328497
03030100	Cromoglicates And Similar	14	1521317	0.000920255	11	273975	0.00401496
04020200	Antipsychotic Depot Injections	14	1521317	0.000920255	11	273975	0.00401496
06040200	Male Sex Hormones And Antagonists	14	1521317	0.000920255	7	273975	0.00255498
09080150	Wilson's Disease	14	1521317	0.000920255	6	273975	0.00218998
09050103	Magnesium	13	1521317	0.000854523	6	273975	0.00218998
71140100	Dry Mouth Products	13	1521317	0.000854523	9	273975	0.00328497
01010202	Indigestion Preparations	12	1521317	0.00078879	6	273975	0.00218998
01030400	Prostaglandin Analogues	12	1521317	0.00078879	3	273975	0.00109499
03040300	Allergic Emergencies	12	1521317	0.00078879	3	273975	0.00109499
04030200	Monoamine-Oxidase Inhibitors (MAOI)	12	1521317	0.00078879	9	273975	0.00328497
08010000	Cytotoxic Drugs	12	1521317	0.00078879	8	273975	0.00291997
09050202	Phosphate-Binding Agents	12	1521317	0.00078879	9	273975	0.00328497
15025000	Other Local Anaesthetics	12	1521317	0.00078879	3	273975	0.00109499
06010209	Gliptins Plus Metformin	11	1521317	0.000723058	11	273975	0.00401496
06070000	Other Endocrine Drugs	11	1521317	0.000723058	1	273975	0.000364997
09010102	Parenteral Iron	11	1521317	0.000723058	5	273975	0.00182498
13110800	Soap Substitute	11	1521317	0.000723058	7	273975	0.00255498
02050100	Vasodilator Antihypertensive Products	10	1521317	0.000657325	6	273975	0.00218998
07040500	Drugs For Erectile Dysfunction	10	1521317	0.000657325	7	273975	0.00255498
11065400	Miotics	10	1521317	0.000657325	4	273975	0.00145999
13500100	Emollient Ointment	10	1521317	0.000657325	5	273975	0.00182498
01030600	Other Ulcer Healing Drugs	9	1521317	0.000591593	3	273975	0.00109499
05030150	Nucleoside Reverse Transcriptase Inhibitors	9	1521317	0.000591593	3	273975	0.00109499
13090300	Androgenetic Alopecia	9	1521317	0.000591593	2	273975	0.000729994
01050400	Food Allergy	8	1521317	0.00052586	7	273975	0.00255498
02070000	Sympathomimetics	8	1521317	0.00052586	5	273975	0.00182498
02120100	Bile Acid Sequestrants - Lipid-Regulating Products	8	1521317	0.00052586	4	273975	0.00145999
06010208	Meglitinides (Glinides)	8	1521317	0.00052586	6	273975	0.00218998
06010213	Glitazones Plus Metformin	8	1521317	0.00052586	5	273975	0.00182498
09050500	Selenium	8	1521317	0.00052586	4	273975	0.00145999
02060401	Other Preparations Used In Peripheral Vascular Disease	6	1521317	0.000394395	4	273975	0.00145999
03010102	Other Adrenoceptor Agonists	6	1521317	0.000394395	2	273975	0.000729994
05010400	Aminoglycosides	6	1521317	0.000394395	5	273975	0.00182498
11040000	Corticosteroids And Other Anti-Inflammatory Preparations (For The Eye)	6	1521317	0.000394395	2	273975	0.000729994
11070000	Local Anaesthetics (For The Eye)	6	1521317	0.000394395	1	273975	0.000364997
12010150	Astringent Preparations	6	1521317	0.000394395	3	273975	0.00109499
72214100	Soft Polymer Wound Contact Dressing Impregnated With Silver	6	1521317	0.000394395	2	273975	0.000729994
04050200	Centrally Acting Apetite Suppressants	5	1521317	0.000328663	3	273975	0.00109499
06010203	Other Antidiabetic Products	5	1521317	0.000328663	3	273975	0.00109499
10010303	Gold Salts	5	1521317	0.000328663	4	273975	0.00145999
14041000	Varicella-Zoster Vaccines	5	1521317	0.000328663	3	273975	0.00109499
72213700	Silver Impregnated Polyurethane Foam Film Dressing Without Adhesive Border	5	1521317	0.000328663	3	273975	0.00109499
72215400	Antimicrobial Dressings	5	1521317	0.000328663	1	273975	0.000364997
04090400	Other Dopaminergic Drugs	4	1521317	0.00026293	3	273975	0.00109499
08020402	Other Immunomodulating Drugs - Inteferon Alfa	4	1521317	0.00026293	3	273975	0.00109499
08030400	Hormone Antagonists (In Malignant Disease)	4	1521317	0.00026293	3	273975	0.00109499
11050000	Mydriatics And Cycloplegics	4	1521317	0.00026293	4	273975	0.00145999
12010200	Drugs Acting On The Ear - Otitis Media	4	1521317	0.00026293	1	273975	0.000364997
14050100	Normal Immunoglobulin	4	1521317	0.00026293	3	273975	0.00109499
71590800	Eye Drop Sodium Hyaluronate Preservative Free	4	1521317	0.00026293	1	273975	0.000364997
72213600	Silver Impregnated Polyurethane Foam Film Dressing With Adhesive Border	4	1521317	0.00026293	2	273975	0.000729994
07010200	Mifepristone	3	1521317	0.000197198	1	273975	0.000364997
08010500	Other Antineoplastic Drugs	3	1521317	0.000197198	2	273975	0.000729994
08015100	Chemotherapy-Induced Mucositis And Myelosuppression	3	1521317	0.000197198	0	273975	0
08030403	Somatostatin Analogues	3	1521317	0.000197198	0	273975	0
12030551	Systemic Treatment Of In Dry Mouth	3	1521317	0.000197198	2	273975	0.000729994
12500300	Nasal Ointment	3	1521317	0.000197198	0	273975	0
13050101	Topical Preparations For Eczema	3	1521317	0.000197198	1	273975	0.000364997
72213400	Silver Coated Barrier Sterile Dressing	3	1521317	0.000197198	3	273975	0.00109499
01060000	Laxatives	2	1521317	0.000131465	1	273975	0.000364997
05040400	Antigiardial Drugs	2	1521317	0.000131465	0	273975	0
07040151	Parasympathomimetics (In Urinary Retention)	2	1521317	0.000131465	1	273975	0.000364997
07040351	Other Preparation For Urinary Disorder	2	1521317	0.000131465	2	273975	0.000729994
08030200	Progestogens (In Malignant Disease)	2	1521317	0.000131465	0	273975	0
09010350	Erythropoietins	2	1521317	0.000131465	2	273975	0.000729994
09080100	Drugs Used In Metabolic Disorders	2	1521317	0.000131465	1	273975	0.000364997
09080158	Urea Cycle Disorders	2	1521317	0.000131465	0	273975	0
13060203	Oral Retinoids For Acne	2	1521317	0.000131465	1	273975	0.000364997
13100100	Antibacterial Preparations (For Skin Conditions)	2	1521317	0.000131465	0	273975	0
14050200	Disease-Specific Immunoglobulin	2	1521317	0.000131465	1	273975	0.000364997
15010401	Benzodiazepines (Peri-Operative)	2	1521317	0.000131465	2	273975	0.000729994
54010000	Therapy Of Acute Cyanide Poisoning	2	1521317	0.000131465	1	273975	0.000364997
01060600	Peripheral Opioid-Receptor Antagonists	1	1521317	6.57325e-05	0	273975	0
01070300	Rectal Sclerosants	1	1521317	6.57325e-05	0	273975	0
02020800	Diuretics With Potassium	1	1521317	6.57325e-05	0	273975	0
02050503	Renin Inhibitors	1	1521317	6.57325e-05	1	273975	0.000364997
04010300	Barbiturates	1	1521317	6.57325e-05	1	273975	0.000364997
04080400	Other Antiepileptic Drugs	1	1521317	6.57325e-05	1	273975	0.000364997
04090000	Products Used For Parkinsonism And Related Disorders	1	1521317	6.57325e-05	1	273975	0.000364997
04110000	Products For Dementia	1	1521317	6.57325e-05	1	273975	0.000364997
05010202	Carbapenems	1	1521317	6.57325e-05	1	273975	0.000364997
05020400	Echinocandin Antifungals	1	1521317	6.57325e-05	1	273975	0.000364997
07040150	Alpha-Blockers (In Urinary Retention)	1	1521317	6.57325e-05	0	273975	0
07040501	Phosphodiesterase Type-5 Inhibitors	1	1521317	6.57325e-05	1	273975	0.000364997
08010300	Antimetabolites	1	1521317	6.57325e-05	1	273975	0.000364997
08010600	Drugs For Cytotoxic-Induced Side Effects	1	1521317	6.57325e-05	1	273975	0.000364997
09010000	Anaemias And Some Other Blood Disorders	1	1521317	6.57325e-05	1	273975	0.000364997
09010300	Drugs Used In Hypoplastic	1	1521317	6.57325e-05	1	273975	0.000364997
09080155	Nephropathic Cystinosis	1	1521317	6.57325e-05	0	273975	0
10020100	Drugs Which Enhance Neuromuscular Transmission	1	1521317	6.57325e-05	0	273975	0
10030200	Rubefacients	1	1521317	6.57325e-05	1	273975	0.000364997
10030252	Rubefacients And Other Topical Antirheumatics - Poultices	1	1521317	6.57325e-05	1	273975	0.000364997
11080000	Miscellaneous Ophthalmic Preparations	1	1521317	6.57325e-05	0	273975	0
13050201	Oral Retinoids For Psoriasis	1	1521317	6.57325e-05	1	273975	0.000364997
72170800	Zinc Oxide Adhesive Tape	1	1521317	6.57325e-05	0	273975	0
72213901	Soft Polymer Wound Contact Dressing With Polyurethane Foam Film Backing With Antimicrobial Agents	1	1521317	6.57325e-05	0	273975	0
72215900	Soft Polymer Wound Contact Dressing With Polyurethane Foam Film Backing And Antimicrobial Agents	1	1521317	6.57325e-05	0	273975	0
00802400	-	0	1521317	0	0	273975	0
01010105	Sodium Citrate	0	1521317	0	0	273975	0
01030000	Antisecretion And Mucosal Protectant Products	0	1521317	0	0	273975	0
01030200	Selective Antimuscarinics	0	1521317	0	0	273975	0
01040000	Acute Diarrhoea	0	1521317	0	0	273975	0
01040300	Enkephalinase Inhibitors	0	1521317	0	0	273975	0
01050000	Chronic Bowel Problem Products	0	1521317	0	0	273975	0
01050301	Cytokine Modulators For Chronic Bowel Problems	0	1521317	0	0	273975	0
01055000	Inflammatory Bowel Disease	0	1521317	0	0	273975	0
01090150	Other Preparations For Biliary Disorders	0	1521317	0	0	273975	0
01100000	Other Anti-Diarrhoeal Products (Non-Acute)	0	1521317	0	0	273975	0
01500000	Gastro-Intestinal Lipase Inhibitor Products	0	1521317	0	0	273975	0
02020600	Mercurial Diuretics	0	1521317	0	0	273975	0
02025000	Other Diuretics	0	1521317	0	0	273975	0
02040100	Beta-Blockers With Diuretics	0	1521317	0	0	273975	0
02050000	Hypertension Or Heart Failure Products	0	1521317	0	0	273975	0
02050300	Adrenergic Neurone Blockers	0	1521317	0	0	273975	0
02065000	Other Products Used For Peripheral Vascular Disease	0	1521317	0	0	273975	0
02070100	Inotropic Sympathomimetics	0	1521317	0	0	273975	0
02070200	Vasoconstrictor Sympathomimetics	0	1521317	0	0	273975	0
02080000	Anticoagulants And Protamine	0	1521317	0	0	273975	0
02110100	Blood Related Products	0	1521317	0	0	273975	0
02120500	Nicotinic Acid Group	0	1521317	0	0	273975	0
02120700	Other Lipid-Regulating Products	0	1521317	0	0	273975	0
03030300	Phosphodiesterase Type 4 (PDE4) Inhibitors	0	1521317	0	0	273975	0
03040000	Antihistamines	0	1521317	0	0	273975	0
03040200	Allergen Immunotherapy	0	1521317	0	0	273975	0
03120000	Other Respiratory System Products	0	1521317	0	0	273975	0
03130000	Antifibrotics	0	1521317	0	0	273975	0
04010000	Hypnotics And Anxiolytics	0	1521317	0	0	273975	0
04065300	Products Used Against Nausea And Vertigo - Cytotoxic Chemotherapy	0	1521317	0	0	273975	0
04065700	Products Used Against Nausea And Vertigo - Neurokinin Receptor Antagonist	0	1521317	0	0	273975	0
04070000	Analgesics	0	1521317	0	0	273975	0
04070500	Other Non Opioid Analgesics	0	1521317	0	0	273975	0
04080101	Carbonic Anhydrase Inhibitors In Epilepsy	0	1521317	0	0	273975	0
04090101	Catechol-O-Methyltransferase Inhibitors	0	1521317	0	0	273975	0
04090102	Monoamine-Oxidase-B Inhibitors	0	1521317	0	0	273975	0
04130000	Other Nervous System Products	0	1521317	0	0	273975	0
05010104	Antipseudomonal Penicillins	0	1521317	0	0	273975	0
05010203	Other Beta-Lactam Antibiotics	0	1521317	0	0	273975	0
05020200	Imidazole Antifungals	0	1521317	0	0	273975	0
05030000	Antivirals	0	1521317	0	0	273975	0
05030100	HIV Infection	0	1521317	0	0	273975	0
05030151	Protease Inhibitors	0	1521317	0	0	273975	0
05030152	Non-Nucleoside Reverse Transcriptase Inhibitors	0	1521317	0	0	273975	0
05030153	Other Antiretrovirals	0	1521317	0	0	273975	0
05030202	Cytomegalovirus Infection	0	1521317	0	0	273975	0
05030300	Viral Hepatitis	0	1521317	0	0	273975	0
05030301	Chronic Hepatitis B	0	1521317	0	0	273975	0
05030302	Chronic Hepatitis C	0	1521317	0	0	273975	0
05030500	Respiratory Syncytial Virus	0	1521317	0	0	273975	0
05040000	Antiprotozoals	0	1521317	0	0	273975	0
05040200	Amoebicides	0	1521317	0	0	273975	0
05040300	Trichomonacides	0	1521317	0	0	273975	0
05040500	Leishmaniacides	0	1521317	0	0	273975	0
05040800	Drugs For Pneumocystis Pneumonia	0	1521317	0	0	273975	0
05050000	Anthelmintics	0	1521317	0	0	273975	0
05050200	Ascaricides	0	1521317	0	0	273975	0
05050300	Products For Tapeworm Infections	0	1521317	0	0	273975	0
05050400	Products For Hookworms	0	1521317	0	0	273975	0
05050500	Schistosomicides	0	1521317	0	0	273975	0
05050600	Filaricides	0	1521317	0	0	273975	0
05050700	Products For Cutaneous Larva Migrans	0	1521317	0	0	273975	0
06010100	Insulins	0	1521317	0	0	273975	0
06010210	Gliflozins Plus Metformin	0	1521317	0	0	273975	0
06010211	Gliflozins Plus Gliptins	0	1521317	0	0	273975	0
06020000	Thyroid And Antithyroid Products	0	1521317	0	0	273975	0
06040000	Sex Hormones	0	1521317	0	0	273975	0
06040201	Anti-Androgens	0	1521317	0	0	273975	0
06040300	Anabolic Steroids	0	1521317	0	0	273975	0
06050155	Growth Hormone Receptor Antagonists	0	1521317	0	0	273975	0
06050201	Posterior Pituitary Hormones	0	1521317	0	0	273975	0
06060100	Calcitonin And Parathyroid Hormone	0	1521317	0	0	273975	0
06070300	Trilostane	0	1521317	0	0	273975	0
06070400	Somatomedins	0	1521317	0	0	273975	0
06070500	Metyrapone	0	1521317	0	0	273975	0
07030101	Combined Hormonal Contraceptives - Standard Strength (Transdermal)	0	1521317	0	0	273975	0
07030500	Emergency Contraception	0	1521317	0	0	273975	0
07040000	Drugs For Genito-Urinary Disorders	0	1521317	0	0	273975	0
07040600	Drugs For Premature Ejaculation	0	1521317	0	0	273975	0
08010100	Alkylating Drugs	0	1521317	0	0	273975	0
08010200	Anthracyclines And Other Cytotoxic Antibiotics	0	1521317	0	0	273975	0
08010400	Vinca Alkaloids And Etoposide	0	1521317	0	0	273975	0
08010550	Platinum Compounds	0	1521317	0	0	273975	0
08010551	Protein Kinase Inhibitors	0	1521317	0	0	273975	0
08010552	Taxanes	0	1521317	0	0	273975	0
08010553	Topoisomerase I Inhibitors	0	1521317	0	0	273975	0
08010554	Tretinoin	0	1521317	0	0	273975	0
08020300	Drugs Affecting The Immune Response - Rituximab And Alemtuzumab	0	1521317	0	0	273975	0
08020400	Other Immunomodulating Drugs	0	1521317	0	0	273975	0
08020401	Other Immunomodulating Drugs - Interferon Gamma	0	1521317	0	0	273975	0
08020403	Other Immunomodulating Drugs - Interferon Beta	0	1521317	0	0	273975	0
08020404	Other Immunomodulating Drugs - Mifamurtide	0	1521317	0	0	273975	0
08020405	Lenalidomide And Thalidomide	0	1521317	0	0	273975	0
08020500	Anti-Lymphocyte Monoclonal Antibodies	0	1521317	0	0	273975	0
08030100	Oestrogens (In Malignant Disease)	0	1521317	0	0	273975	0
09010100	Iron-Deficiency Anaemias	0	1521317	0	0	273975	0
09010400	Drugs Used In Platelet Disorders	0	1521317	0	0	273975	0
09010401	Essential Thrombocythaemia	0	1521317	0	0	273975	0
09010402	Idiopathic Thrombocytopenic Purpura	0	1521317	0	0	273975	0
09010600	Drugs Used In Neutropenia	0	1521317	0	0	273975	0
09050000	Minerals	0	1521317	0	0	273975	0
09050102	Hypercalcaemia And Hypercalciuria	0	1521317	0	0	273975	0
09060000	Vitamins	0	1521317	0	0	273975	0
09070000	Bitters And Tonics	0	1521317	0	0	273975	0
09080151	Carnitine Deficiency	0	1521317	0	0	273975	0
09080152	Fabry's Disease	0	1521317	0	0	273975	0
09080153	Gaucher's Disease	0	1521317	0	0	273975	0
09080154	Mucopolysaccharidosis	0	1521317	0	0	273975	0
09080157	Tyrosinaemia Type 1	0	1521317	0	0	273975	0
09080159	Homocystinuria	0	1521317	0	0	273975	0
09080160	Other Metabolic Disorders	0	1521317	0	0	273975	0
09080161	Acute Porphyrias	0	1521317	0	0	273975	0
09100000	Trace Elements	0	1521317	0	0	273975	0
10010000	Drugs Used In Rheumatic Diseases And Gout	0	1521317	0	0	273975	0
10010301	Cytokine Modulators In Rheumatic Disease	0	1521317	0	0	273975	0
10010452	Hyperuricaemia Associated With Cytotoxic Drugs	0	1521317	0	0	273975	0
10020102	Acetylcholine-Release Enhancers	0	1521317	0	0	273975	0
10030000	Drugs For The Treatment Of Soft-Tissue Disorders And Topical Pain Relief	0	1521317	0	0	273975	0
10050000	Other Drugs For Disorders Of Musculoskeletal System	0	1521317	0	0	273975	0
11000000	Eye	0	1521317	0	0	273975	0
11010100	Antineovascularisation Agents	0	1521317	0	0	273975	0
11030000	Anti-Infective Eye Preparations	0	1521317	0	0	273975	0
11030200	Antifungals (In Eye Preperation)	0	1521317	0	0	273975	0
11050200	Sympathomimetics	0	1521317	0	0	273975	0
11060000	Treatment Of Glaucoma	0	1521317	0	0	273975	0
11080252	Subfoveal Choroidal Neovascularisation	0	1521317	0	0	273975	0
12010000	Drugs Acting On The Ear	0	1521317	0	0	273975	0
12500000	Miscellaneous Nasal Preparations	0	1521317	0	0	273975	0
12500100	Nasal Drops	0	1521317	0	0	273975	0
13050102	Oral Retinoid For Eczema	0	1521317	0	0	273975	0
13050203	Injection Preparations For Psoriasis	0	1521317	0	0	273975	0
13050350	Cytokine Modulators For Eczema And Psoriasis	0	1521317	0	0	273975	0
13100550	Collodion	0	1521317	0	0	273975	0
13500300	Skin Depigmentation	0	1521317	0	0	273975	0
14041200	Vaccines And Antisera - Bacillus Calmette Guerin Vaccine	0	1521317	0	0	273975	0
14050000	Immunoglobulins	0	1521317	0	0	273975	0
14050203	Disease-Specific Immunoglobulins - Tetanus	0	1521317	0	0	273975	0
15010403	Opioid Analgesics (In Anaesthesia)	0	1521317	0	0	273975	0
18010000	Miscellaneous Specials	0	1521317	0	0	273975	0
18020000	Other Therapeutic Products	0	1521317	0	0	273975	0
54070000	Therapy Of Poisoning By Heavy Metals	0	1521317	0	0	273975	0
57082900	-	0	1521317	0	0	273975	0
64050000	Surgical Preparations	0	1521317	0	0	273975	0
71210100	Inhalation Solution Sodium Chloride	0	1521317	0	0	273975	0
71380300	Nasal Spray Hypertonic	0	1521317	0	0	273975	0
71380600	Nasal Drops Glucose In Glycerol	0	1521317	0	0	273975	0
71450100	Synovial Fluid	0	1521317	0	0	273975	0
71520000	Vaginal Moisturiser	0	1521317	0	0	273975	0
71580400	Preparations For Treatment Of Radiation Induced Dermatitis	0	1521317	0	0	273975	0
71590200	Eye Drop Carmellose	0	1521317	0	0	273975	0
71590400	Eye Drop Hypromellose	0	1521317	0	0	273975	0
71590500	Eye Drop Hydroxypropyl Guar	0	1521317	0	0	273975	0
71590600	Eye Drop Sodium Hyaluronate	0	1521317	0	0	273975	0
71591000	Eye Gel - Carbomer	0	1521317	0	0	273975	0
71770000	Bladder Instillation	0	1521317	0	0	273975	0
72045100	Zinc Paste And Calamine Bandage	0	1521317	0	0	273975	0
72090000	Gauze Dressings (Impregnated)	0	1521317	0	0	273975	0
72170900	Zinc Oxide Adhesive Tape BP 1988	0	1521317	0	0	273975	0
72212100	Hydrocolloid Dressing Silver Impregnated Sterile	0	1521317	0	0	273975	0
72215600	Silver Paste	0	1521317	0	0	273975	0
72216400	Topical Haemoglobin	0	1521317	0	0	273975	0
72216500	Bioactive Soluble Beta-Glucan Gel	0	1521317	0	0	273975	0

## Sheet: AllTrimester
Medication category (BNF chapter and section)	Description	All Pregnancies			Pregnancies of women with active multimorbidity
		Numerator	Denominator	Estimated prescription percentage	Numerator	Denominator	Estimated prescription percentage
09010101	Oral Iron	259131	1521317	17.0333	48669	273975	17.764
05010103	Broad-Spectrum Penicillins	179606	1521317	11.806	43986	273975	16.0548
01010201	Compound Alginate Preparations	163857	1521317	10.7707	37370	273975	13.6399
07020250	Preparations For Vaginal And Vulval Candidiasis	158642	1521317	10.4279	36999	273975	13.5045
04070100	Non-Opioid And Compound Analgesics	121404	1521317	7.98019	37622	273975	13.7319
13040000	Topical Corticosteroids	83632	1521317	5.49734	24640	273975	8.99352
03010101	Selective Beta 2 Agonists	80064	1521317	5.26281	36546	273975	13.3392
06040103	Progestogen Products Doubling (In House Use)	76312	1521317	5.01618	13912	273975	5.07784
04030300	Selective Serotonin Re-Uptake Inhibitors (SSRI)	74217	1521317	4.87847	45551	273975	16.626
05010201	Cephalosporins	69838	1521317	4.59063	16893	273975	6.16589
01060400	Osmotic Laxatives	65082	1521317	4.278	18536	273975	6.76558
12020101	Corticosteroids Used In Nasal Allergy	39266	1521317	2.58105	14304	273975	5.22091
04060000	Products Used Against Nausea And Vertigo	38928	1521317	2.55884	11602	273975	4.23469
13020102	Emollient Skin Preparations	38229	1521317	2.51289	11680	273975	4.26316
03020000	Corticosteroids (For Respiratory Conditions)	35543	1521317	2.33633	16336	273975	5.96259
05010102	Penicillinase-Resistant Penicillins	31853	1521317	2.09378	8332	273975	3.04115
10010100	Non-Steroidal Anti-Inflammatory Drugs	31539	1521317	2.07314	9707	273975	3.54302
01030500	Proton Pump Inhibitors	30964	1521317	2.03534	13437	273975	4.90446
05010500	Macrolides	30882	1521317	2.02995	9227	273975	3.36783
05010101	Benzylpenicillin And Phenoxymethylpenicillin	28855	1521317	1.89671	6377	273975	2.32758
01070200	Compound Haemorrhoid Products With Corticosteroids	28844	1521317	1.89599	7255	273975	2.64805
03040101	Non-Sedating Antihistamines	27971	1521317	1.8386	11049	273975	4.03285
05011300	Urinary-Tract Infections	27870	1521317	1.83197	7723	273975	2.81887
06020100	Thyroid Hormones	26565	1521317	1.74618	15224	273975	5.55671
04020101	First-Generation Antipsychotic Drugs	26427	1521317	1.73711	8029	273975	2.93056
05010800	Sulphonamides And Trimethoprim	26272	1521317	1.72692	6883	273975	2.51227
02090000	Antiplatelet Products	24673	1521317	1.62182	8414	273975	3.07108
04065400	Products Used Against Nausea And Vertigo - Antihistamines	24151	1521317	1.58751	6847	273975	2.49913
03040102	Sedating Antihistamines	22523	1521317	1.48049	6736	273975	2.45862
01030100	H2-Receptor Antagonists	22164	1521317	1.4569	7298	273975	2.66375
13020100	Emollients	21224	1521317	1.39511	6021	273975	2.19765
04105100	Substance Dependence - Nicotine Dependence	19414	1521317	1.27613	5603	273975	2.04508
04065500	Products Used Against Nausea And Vertigo - Domperidone & Metoclopramide	19348	1521317	1.27179	5910	273975	2.15713
05011100	Metronidazole And Tinidazole	19153	1521317	1.25897	4882	273975	1.78191
11030100	Antibacterials (In Eye Preparation)	18693	1521317	1.22874	4242	273975	1.54832
11040200	Other Anti-Inflammatory Eye Preparations (For The Eye)	18600	1521317	1.22262	5794	273975	2.11479
01060100	Bulk-Forming Laxatives	17774	1521317	1.16833	5255	273975	1.91806
04010100	Hypnotics	17692	1521317	1.16294	8388	273975	3.06159
01040200	Antimotility Products	16918	1521317	1.11206	6450	273975	2.35423
02040000	Beta-Adrenoceptor Blockers	16077	1521317	1.05678	8074	273975	2.94698
04070200	Opioid Analgesics	15842	1521317	1.04133	8153	273975	2.97582
13100101	Antibacterial Preparations Only Used Topically	14936	1521317	0.981781	4061	273975	1.48225
01070000	Local Products For Anal Or Rectal Problems	14567	1521317	0.957526	3483	273975	1.27128
14040800	Vaccines And Antisera - Diphtheria Vaccines	13817	1521317	0.908226	2872	273975	1.04827
06040102	Progestogens And Progesterone Receptor Modulators	13666	1521317	0.898301	4206	273975	1.53518
04030100	Tricyclic And Related Antidepressants	13348	1521317	0.877398	7985	273975	2.9145
01050200	Corticosteroids In Chronic Bowel Problems	12763	1521317	0.838944	6511	273975	2.37649
04010201	Benzodiazepines	12411	1521317	0.815806	7428	273975	2.7112
13020101	Emollient Bath Additives And Shower Preparations	12374	1521317	0.813374	4593	273975	1.67643
06010202	Biguanides (Metformin)	11988	1521317	0.788001	5826	273975	2.12647
04030400	Other Antidepressants	11251	1521317	0.739557	8681	273975	3.16854
09060400	Vitamin D	11244	1521317	0.739096	3630	273975	1.32494
01010101	Aluminium- And Magnesium- Containing Antacids	11141	1521317	0.732326	2470	273975	0.901542
13040200	Mild Topical Corticosteroids	9358	1521317	0.615125	2339	273975	0.853728
05010300	Tetracyclines	9344	1521317	0.614205	2995	273975	1.09317
01060200	Stimulant Laxatives	9263	1521317	0.60888	3399	273975	1.24062
13060102	Topical Antibacterials For Acne	9175	1521317	0.603096	2258	273975	0.824163
12010151	Anti-Inflammatory Preparations	9036	1521317	0.593959	2540	273975	0.927092
06010101	Short-Acting Insulins	8954	1521317	0.588569	5410	273975	1.97463
03010000	Bronchodilators	8929	1521317	0.586926	4030	273975	1.47094
09010200	Drugs Used In Megaloblastic Anaemias	8768	1521317	0.576343	3243	273975	1.18368
01020200	Other Antispasmodics	8712	1521317	0.572662	3580	273975	1.30669
06010102	Intermediate- And Long-Acting Insulins	8597	1521317	0.565102	5202	273975	1.89871
13030000	Topical Local Anaesthetics And Antipruritics	7533	1521317	0.495163	1964	273975	0.716854
14040200	Vaccines And Antisera - Influenza Vaccines	7353	1521317	0.483331	1733	273975	0.632539
10030250	Topical Nsaids And Counter Irritants	7348	1521317	0.483003	2277	273975	0.831098
12030100	Drugs For Oral Ulceration And Inflammation	7235	1521317	0.475575	1970	273975	0.719044
13020103	Antimicrobial Emollients	7036	1521317	0.462494	2430	273975	0.886942
13100200	Antifungal Preparations (Topical	6992	1521317	0.459602	1781	273975	0.650059
05020100	Triazole Antifungals	6870	1521317	0.451582	2198	273975	0.802263
09060700	Multivitamin And Multimineral Preparations	6514	1521317	0.428182	1912	273975	0.697874
04070401	Acute Migraine	6470	1521317	0.425289	3202	273975	1.16872
02080100	Parenteral Anticoagulants	6299	1521317	0.414049	2534	273975	0.924902
13100300	Antiviral Preparations (Topical	6281	1521317	0.412866	1801	273975	0.657359
01070100	Soothing Haemorrhoid Products	6090	1521317	0.400311	1521	273975	0.55516
04020100	Antipsychotic Products	5801	1521317	0.381314	1382	273975	0.504426
03090200	Demulcent And Expectorant Cough Preparations	5609	1521317	0.368694	1295	273975	0.472671
09020102	Oral Sodium And Water	5542	1521317	0.36429	1239	273975	0.452231
13100400	Parasiticidal Preparations (Topical)	5488	1521317	0.36074	1300	273975	0.474496
05030201	Herpes Simplex And Varicella-Zoster Infection	5444	1521317	0.357848	1556	273975	0.567935
13090000	Shampoos And Other Preparations For Scalp And Hair Conditions	5315	1521317	0.349368	1967	273975	0.717949
04065600	Products Used Against Nausea And Vertigo - 5 HT3 Antagonists	4718	1521317	0.310126	1658	273975	0.605165
01010000	Indigestion And GORD (Gastro-Oesophageal Reflux Disease)	4494	1521317	0.295402	1149	273975	0.419381
04080100	Control Of Epilepsy	4474	1521317	0.294087	2545	273975	0.928917
12010300	Drugs Acting On The Ear - Removal Of Ear Wax	4276	1521317	0.281072	1050	273975	0.383247
13060100	Topical Preparations For Acne	4262	1521317	0.280152	1139	273975	0.415731
04020102	Second-Generation Antipsychotic Drugs	4173	1521317	0.274302	3596	273975	1.31253
71580200	Emollient Ointment	4078	1521317	0.268057	1477	273975	0.5391
03090100	Cough Suppressants	3989	1521317	0.262207	966	273975	0.352587
15020000	Local Anaesthesia	3932	1521317	0.25846	1120	273975	0.408796
07020251	Preparations For Other Vaginal Infections	3837	1521317	0.252216	1039	273975	0.379232
12020300	Nasal Preparations For Infection	3802	1521317	0.249915	1120	273975	0.408796
02050200	Centrally Acting Antihypertensive Products	3793	1521317	0.249323	1838	273975	0.670864
12010100	Drugs Acting On The Ear - Otitis Externa	3771	1521317	0.247877	974	273975	0.355507
09050101	Calcium Supplements	3643	1521317	0.239464	1216	273975	0.443836
11080100	Tear Deficiency	3589	1521317	0.235914	1369	273975	0.499681
09020100	Oral Preparations For Fluid And Electrolyte Imbalance	3564	1521317	0.234271	1023	273975	0.373392
01050100	Aminosalicylates	3450	1521317	0.226777	1785	273975	0.651519
04020000	Products Used In Psychoses And Related Disorders	3331	1521317	0.218955	1847	273975	0.674149
13060101	Benzoyl Peroxide And Azelaic Acid For Acne	3218	1521317	0.211527	802	273975	0.292727
13070000	Preparations For Warts And Calluses	3179	1521317	0.208964	678	273975	0.247468
05011200	Quinolones	3037	1521317	0.19963	970	273975	0.354047
13090100	Shampoos And Other Scalp Preparations	3011	1521317	0.197921	1230	273975	0.448946
02110000	Antifibrinolytic Products And Haemostatics	2941	1521317	0.193319	1026	273975	0.374487
13040100	Topical Corticosteroids With Antimicrobials	2848	1521317	0.187206	855	273975	0.312072
02060200	Calcium-Channel Blockers	2723	1521317	0.17899	1568	273975	0.572315
07030100	Combined Hormonal Contraceptives	2689	1521317	0.176755	499	273975	0.182133
07030201	Oral Progestogen-Only Contraceptives	2640	1521317	0.173534	488	273975	0.178118
11040100	Corticosteroids (In Eye Preparations)	2551	1521317	0.167684	881	273975	0.321562
06040101	Oestrogens And HRT	2464	1521317	0.161965	925	273975	0.337622
06010400	Treatment Of Hypoglycaemia	2438	1521317	0.160256	1560	273975	0.569395
05050100	Products For Threadworms	2325	1521317	0.152828	528	273975	0.192718
13100102	Antibacterial Preparations Also Used Systemically (For Skin Conditions)	2303	1521317	0.151382	766	273975	0.279588
13050200	Preparations For Psoriasis	2295	1521317	0.150856	938	273975	0.342367
02050501	Angiotensin-Converting Enzyme Inhibitors (ACE Inhibitors)	2135	1521317	0.140339	1509	273975	0.55078
07020100	Preparations For Vaginal And Vulval Changes	2134	1521317	0.140273	527	273975	0.192353
01020100	Antimuscarinics	2116	1521317	0.13909	830	273975	0.302947
06040104	Selective Estrogen Receptor Modulators (Serms)	2074	1521317	0.136329	794	273975	0.289807
04050100	Anti-Obesity Products Acting On The Gastro-Intestinal Tract	2058	1521317	0.135278	948	273975	0.346017
01020000	Antispasmodics And Products Affecting Motility	1914	1521317	0.125812	877	273975	0.320102
03030200	Leukotriene Receptor Antagonists	1900	1521317	0.124892	1336	273975	0.487636
09060200	Vitamin B Group	1775	1521317	0.116675	837	273975	0.305502
03100000	Systemic Nasal Decongestants	1725	1521317	0.113389	461	273975	0.168264
04070300	Neuropathic Pain	1699	1521317	0.11168	1206	273975	0.440186
09060300	Vitamin C	1682	1521317	0.110562	359	273975	0.131034
01050300	Products Affecting The Immune Response In Chronic Bowel Problems	1623	1521317	0.106684	1019	273975	0.371932
12020250	Sympathomimetics (Nasal Decongestants)	1615	1521317	0.106158	422	273975	0.154029
71580100	Emollient Cream	1608	1521317	0.105698	572	273975	0.208778
04070402	Prophylaxis Of Migraine	1604	1521317	0.105435	992	273975	0.362077
13040400	Potent Topical Corticosteroids	1562	1521317	0.102674	507	273975	0.185053
06020200	Antithyroid Products	1547	1521317	0.101688	745	273975	0.271923
07020200	Vaginal And Vulval Infections	1465	1521317	0.0962981	334	273975	0.121909
04030000	Antidepressants	1399	1521317	0.0919598	1127	273975	0.411351
02020100	Thiazides And Related Diuretics	1378	1521317	0.0905794	813	273975	0.296742
12500200	Nasal Spray	1338	1521317	0.0879501	497	273975	0.181403
02120400	Statins	1314	1521317	0.0863725	982	273975	0.358427
13020200	Barrier Preparations	1223	1521317	0.0803909	409	273975	0.149284
04020300	Products Used For Mania And Hypomania	1199	1521317	0.0788133	774	273975	0.282508
12030200	Oropharyngeal Anti-Infective Drugs	1186	1521317	0.0779588	377	273975	0.137604
05030400	Influenza	1156	1521317	0.0759868	311	273975	0.113514
02030203	Ventricular Arrhythmias	1119	1521317	0.0735547	229	273975	0.0835843
05020000	Antifungals	1116	1521317	0.0733575	310	273975	0.113149
07040250	Urinary Incontinence	1101	1521317	0.0723715	601	273975	0.219363
07030202	Parenteral Progestogen-Only Contraceptives	1075	1521317	0.0706625	196	273975	0.0715394
13130000	Topical Circulatory Preparations	1064	1521317	0.0699394	237	273975	0.0865042
14040500	Vaccines And Antisera - Hepatitis A Vaccine	1060	1521317	0.0696765	199	273975	0.0726344
13060103	Topical Retinoids And Related Preparations For Acne	1027	1521317	0.0675073	292	273975	0.106579
12020151	Cromoglicate In Nasal Allergy	1022	1521317	0.0671786	278	273975	0.101469
09060600	Vitamin K	969	1521317	0.0636948	285	273975	0.104024
06030200	Glucocorticoid Therapy	952	1521317	0.0625774	452	273975	0.164979
14040000	Immunological Products And Vaccines - Vaccines And Antisera	923	1521317	0.0606711	183	273975	0.0667944
12020200	Topical Nasal Decongestants	921	1521317	0.0605397	259	273975	0.0945342
01010103	Antacid Preparations Containing Simeticone Or Local Anaesthetics	843	1521317	0.0554125	163	273975	0.0594945
02020200	Loop Diuretics	808	1521317	0.0531119	418	273975	0.152569
07030450	Intrauterine Contraceptive Devices	795	1521317	0.0522574	171	273975	0.0624145
04066000	Other Products For Meniere Disease	794	1521317	0.0521916	305	273975	0.111324
14041100	Vaccines And Antisera - Typhoid Vaccine	784	1521317	0.0515343	146	273975	0.0532895
06010151	Biphasic Insulins	778	1521317	0.0511399	383	273975	0.139794
13050202	Topical Preparations For Psoriasis	759	1521317	0.049891	341	273975	0.124464
13050000	Preparations For Eczema And Psoriasis	741	1521317	0.0487078	356	273975	0.129939
12020301	Nasal Staphylococci	739	1521317	0.0485763	223	273975	0.0813943
01060300	Faecal Softeners	738	1521317	0.0485106	351	273975	0.128114
01090100	Products Affecting Bile Composition And Flow	726	1521317	0.0477218	211	273975	0.0770143
10010300	Drugs That Suppress The Rheumatic Disease Process	711	1521317	0.0467358	447	273975	0.163154
05020500	Other Antifungals	667	1521317	0.0438436	156	273975	0.0569395
01020300	Motility Stimulants	664	1521317	0.0436464	147	273975	0.0536545
05040100	Antimalarials	635	1521317	0.0417401	110	273975	0.0401496
02080200	Oral Anticoagulants	606	1521317	0.0398339	398	273975	0.145269
10030100	Enzymes (In Relief Of Soft-Tissue Inflammation)	605	1521317	0.0397682	175	273975	0.0638744
03010200	Antimuscarinic Bronchodilators	589	1521317	0.0387165	440	273975	0.160599
02050502	Angiotensin-II Receptor Antagonists	586	1521317	0.0385193	409	273975	0.149284
04090100	Dopaminergic Drugs Used In Parkinson's Disease/Dystonias	569	1521317	0.0374018	252	273975	0.0919792
13060104	Other Topical Preparations For Acne	560	1521317	0.0368102	149	273975	0.0543845
14040600	Vaccines And Antisera - Hepatitis A Vaccine With Typhoid Vaccine	542	1521317	0.035627	96	273975	0.0350397
01010100	Antacids And Simeticone	518	1521317	0.0340494	139	273975	0.0507346
06070100	Bromocriptine And Other Dopaminergic Drugs	511	1521317	0.0335893	277	273975	0.101104
01070400	Anal Fissure Management	499	1521317	0.0328005	149	273975	0.0543845
10030251	Rubefacients And Other Topical Antirheumatics - Capsaicin	499	1521317	0.0328005	227	273975	0.0828543
12020150	Antihistamines In Nasal Allergy	480	1521317	0.0315516	139	273975	0.0507346
03010300	Theophylline	464	1521317	0.0304999	332	273975	0.121179
12030300	Lozenges	464	1521317	0.0304999	124	273975	0.0452596
13040300	Moderate Topical Corticosteroids	461	1521317	0.0303027	161	273975	0.0587645
04080200	Products Used In Status Epilepticus	411	1521317	0.0270161	180	273975	0.0656994
03080000	Aromatic Inhalations	397	1521317	0.0260958	90	273975	0.0328497
05010105	Mecillinams	386	1521317	0.0253728	123	273975	0.0448946
06010201	Sulphonylureas	380	1521317	0.0249784	279	273975	0.101834
01010102	Aluminium-Magnesium Complexes	372	1521317	0.0244525	90	273975	0.0328497
04010200	Anxiolytics	368	1521317	0.0241896	246	273975	0.0897892
07030550	Hormonal Methods	361	1521317	0.0237294	119	273975	0.0434346
10020202	Other Muscle Relaxants	355	1521317	0.023335	154	273975	0.0562095
04040000	CNS Stimulants And Products Used For Attention Deficit Hyperactivity Disorder (ADHD)	347	1521317	0.0228092	211	273975	0.0770143
13050300	Drugs Affecting The Immune Response For Eczema And Psoriasis	343	1521317	0.0225463	189	273975	0.0689844
03010400	Compound Bronchodilator Products	313	1521317	0.0205743	223	273975	0.0813943
13070100	Anogenital Warts	310	1521317	0.0203771	93	273975	0.0339447
05010600	Clindamycin	307	1521317	0.0201799	124	273975	0.0452596
10020200	Skeletal Muscle Relaxants	298	1521317	0.0195883	213	273975	0.0777443
13020000	Emollient And Barrier Preparations	298	1521317	0.0195883	100	273975	0.0364997
07040350	Alkalinisation Of Urine	297	1521317	0.0195226	76	273975	0.0277398
12020100	Drugs Used In Nasal Allergy	293	1521317	0.0192596	70	273975	0.0255498
07030152	Combined Hormonal Contraceptives - Standard Strength (Oral)	291	1521317	0.0191282	40	273975	0.0145999
12010152	Anti-Infective Preparations	287	1521317	0.0188652	93	273975	0.0339447
71860000	Emollient And Barrier Preparations	285	1521317	0.0187338	108	273975	0.0394197
13500200	Emollient Cream	284	1521317	0.018668	114	273975	0.0416096
05020300	Polyene Antifungals	251	1521317	0.0164989	80	273975	0.0291997
71560000	Oral Film Forming Agent	251	1521317	0.0164989	77	273975	0.0281048
13090200	Hirsutism	248	1521317	0.0163017	130	273975	0.0474496
05040101	Treatment Of Malaria	246	1521317	0.0161702	141	273975	0.0514646
10010202	Local Corticosteroid Injections	244	1521317	0.0160387	102	273975	0.0372297
08020200	Corticosteroids And Other Immunosuppressants	243	1521317	0.015973	190	273975	0.0693494
04105000	Substance Dependence - Alcohol Dependence	232	1521317	0.0152499	205	273975	0.0748243
13500000	Miscellaneous Skin Preparations	230	1521317	0.0151185	80	273975	0.0291997
13000000	Skin	229	1521317	0.0150527	57	273975	0.0208048
01020400	Compounds Preparations	224	1521317	0.0147241	61	273975	0.0222648
07030150	Combined Hormonal Contraceptives - Low Strength (Oral)	213	1521317	0.014001	31	273975	0.0113149
02060100	Nitrates	207	1521317	0.0136066	94	273975	0.0343097
06010500	Treatment Of Diabetic Nephropathy And Neuropathy	207	1521317	0.0136066	83	273975	0.0302947
06060200	Bisphosphonates And Other Drugs Affecting Bone Metabolism	204	1521317	0.0134094	155	273975	0.0565745
02050400	Alpha-Adrenoceptor Blockers	201	1521317	0.0132122	144	273975	0.0525595
06050200	Posterior Pituitary Hormones And Antagonists	197	1521317	0.0129493	103	273975	0.0375947
04090200	Antimuscarinic Drugs Used In Parkinsonism/Dystonias	193	1521317	0.0126864	157	273975	0.0573045
09060750	-	190	1521317	0.0124892	53	273975	0.0193448
12020251	Antimuscarinic (Nasal Decongestants)	188	1521317	0.0123577	62	273975	0.0226298
07020000	Treatment Of Vaginal And Vulval Conditions	183	1521317	0.0120291	62	273975	0.0226298
06070200	Drugs Affecting Gonadotrophins	177	1521317	0.0116347	66	273975	0.0240898
01010200	Compound Alginates And Proprietary Indigestion Preparations	176	1521317	0.0115689	60	273975	0.0218998
50030000	Extemporaneous Item	172	1521317	0.011306	46	273975	0.0167899
03070000	Mucolytics	171	1521317	0.0112403	107	273975	0.0390547
01090200	Bile Acid Sequestrants	170	1521317	0.0111745	103	273975	0.0375947
11065000	Beta-Blockers (In Glaucoma)	159	1521317	0.0104515	81	273975	0.0295647
71520100	Vaginal Moisturiser	159	1521317	0.0104515	66	273975	0.0240898
11030300	Antivirals (In Eye Preparations)	153	1521317	0.0100571	44	273975	0.0160599
09020101	Oral Potassium	150	1521317	0.00985988	73	273975	0.0266448
13040500	Very Potent Topical Corticosteroids	148	1521317	0.00972841	46	273975	0.0167899
02020300	Potassium-Sparing Diuretics And Aldosterone Antagonists	147	1521317	0.00966268	100	273975	0.0364997
11065100	Prostaglandin Analogues (In Glaucoma)	141	1521317	0.00926829	66	273975	0.0240898
06030100	Replacement Corticosteroids For Endocrine Conditions	140	1521317	0.00920255	69	273975	0.0251848
06070250	Gonadorelin Analogues	140	1521317	0.00920255	63	273975	0.0229948
14040400	Vaccines And Antisera - Hepatitis B Vaccine	138	1521317	0.00907109	40	273975	0.0145999
01090401	Pancreatin	130	1521317	0.00854523	98	273975	0.0357697
13110700	Preparations For The Promotion Of Wound Healing	129	1521317	0.0084795	44	273975	0.0160599
72214500	Silicone Topical Gel	129	1521317	0.0084795	41	273975	0.0149649
05010900	Antituberculosis Drugs	128	1521317	0.00841376	34	273975	0.0124099
09040153	Nutritional Supplements For Metabolic Disease	121	1521317	0.00795363	36	273975	0.0131399
01010104	Simeticone Alone	112	1521317	0.00736204	29	273975	0.0105849
01040100	Adsorbents And Bulk-Forming Products	111	1521317	0.00729631	30	273975	0.0109499
07010300	Myometrial Relaxants	109	1521317	0.00716484	44	273975	0.0160599
07030300	Spermicidal Contraceptives	108	1521317	0.00709911	27	273975	0.00985491
71580300	Emollient Preparation Containing Urea	104	1521317	0.00683618	52	273975	0.0189798
02030201	Supraventricular & Ventricular Arrhythmias	103	1521317	0.00677045	48	273975	0.0175198
14040700	Vaccines And Antisera - Pneumococcal Vaccine	102	1521317	0.00670472	61	273975	0.0222648
06010204	Dipeptidyl Peptidase 4 Inhibitors (DPP 4 Inhibitors	100	1521317	0.00657325	75	273975	0.0273748
11050100	Antimuscarinics	98	1521317	0.00644179	45	273975	0.0164249
02020700	Carbonic Anhydrase Inhibitors	97	1521317	0.00637605	67	273975	0.0244548
02030200	Products For Arrhythmias	94	1521317	0.00617886	40	273975	0.0145999
08030402	Prostate Cancer	93	1521317	0.00611312	47	273975	0.0171549
14040100	Vaccines And Antisera - Human Papilloma Virus	93	1521317	0.00611312	11	273975	0.00401496
02080201	Novel Oral Anticoagulants (Noacs)	87	1521317	0.00571873	65	273975	0.0237248
06010207	Thiazolidinedione (Glitazones)	85	1521317	0.00558726	71	273975	0.0259148
14050300	Anti-D (RHO) Immunoglobulin	84	1521317	0.00552153	21	273975	0.00766493
01060800	Other Products Used In Constipation	78	1521317	0.00512714	49	273975	0.0178848
02020400	Potassium-Sparing Diuretics With Other Diuretics	75	1521317	0.00492994	39	273975	0.0142349
02100200	Fibrinolytic Products	75	1521317	0.00492994	26	273975	0.00948992
11065300	Carbonic Anhydrase Inhibitors And Systemic Drugs (In Glaucoma)	74	1521317	0.00486421	49	273975	0.0178848
04065900	Products Used Against Nausea And Vertigo - Hyoscine	72	1521317	0.00473274	26	273975	0.00948992
04105200	Substance Dependence - Opioid Dependence	72	1521317	0.00473274	52	273975	0.0189798
02120600	Omega-3 Fatty Acid Compounds	68	1521317	0.00446981	27	273975	0.00985491
14050204	Disease-Specific Immunoglobulins - Varicella Zoster	68	1521317	0.00446981	16	273975	0.00583995
09060500	Vitamin E	67	1521317	0.00440408	34	273975	0.0124099
72045000	Zinc Paste Bandage	63	1521317	0.00414115	28	273975	0.0102199
06050100	Hypothalamic And Anterior Pituitary Hormones And Anti-Oestrogens	62	1521317	0.00407542	23	273975	0.00839493
14040300	Vaccines And Antisera - Meningococcal Vaccines	62	1521317	0.00407542	11	273975	0.00401496
10010451	Long-Term Control Of Gout	61	1521317	0.00400968	40	273975	0.0145999
13050100	Preparations For Eczema	60	1521317	0.00394395	18	273975	0.00656994
71590900	Artificial Eye Lubricant	60	1521317	0.00394395	30	273975	0.0109499
01010202	Indigestion Preparations	57	1521317	0.00374675	18	273975	0.00656994
06050152	Anterior Pituitary Hormones - Gonadotrophins	56	1521317	0.00368102	11	273975	0.00401496
07020150	Oestrogens	56	1521317	0.00368102	20	273975	0.00729994
13080150	Treatment Of Photodamage	55	1521317	0.00361529	7	273975	0.00255498
01060500	Bowel Cleansing Solutions	54	1521317	0.00354956	29	273975	0.0105849
06060000	Products Affecting Bone Metabolism	54	1521317	0.00354956	22	273975	0.00802993
10010500	Other Drugs For Rheumatic Diseases	54	1521317	0.00354956	23	273975	0.00839493
06010206	Glucagon-Like Peptide-1 Receptor Agonists ( GLP-1 Receptor Agonists	53	1521317	0.00348382	45	273975	0.0164249
09060100	Vitamin A	53	1521317	0.00348382	26	273975	0.00948992
01030300	Chelates And Complexes	52	1521317	0.00341809	32	273975	0.0116799
71110100	Intrauterine Contraceptive Device	48	1521317	0.00315516	8	273975	0.00291997
01030800	Helicobacter Pylori Eradication	46	1521317	0.0030237	15	273975	0.00547495
06010205	SGLT2 Inhibitors (Gliflozins)	44	1521317	0.00289223	39	273975	0.0142349
02010100	Cardiac Glycosides	43	1521317	0.0028265	26	273975	0.00948992
09020103	Oral Bicarbonate	42	1521317	0.00276077	33	273975	0.0120449
09050400	Zinc	42	1521317	0.00276077	24	273975	0.00875992
03095000	Miscellaneous Cough & Cold Preparations	41	1521317	0.00269503	12	273975	0.00437996
04080102	Phenobarbital And Primidone	41	1521317	0.00269503	19	273975	0.00693494
10010450	Acute Attacks Of Gout	40	1521317	0.0026293	12	273975	0.00437996
05010701	Polymyxins	39	1521317	0.00256357	25	273975	0.00912492
06050153	Human Menopausal Gonadotrophins	39	1521317	0.00256357	12	273975	0.00437996
02120300	Fibrates	38	1521317	0.00249784	30	273975	0.0109499
09050300	Fluoride	37	1521317	0.0024321	27	273975	0.00985491
03030100	Cromoglicates And Similar	36	1521317	0.00236637	20	273975	0.00729994
08020100	Antiproliferative Immunosuppressants	35	1521317	0.00230064	30	273975	0.0109499
15025000	Other Local Anaesthetics	35	1521317	0.00230064	8	273975	0.00291997
02120200	Ezetimibe	34	1521317	0.00223491	25	273975	0.00912492
03040103	Antihistamines Used For Nausea And Vomiting	34	1521317	0.00223491	8	273975	0.00291997
07040200	Drugs For Urinary Frequency	34	1521317	0.00223491	15	273975	0.00547495
02060300	Other Anti-Angina Products	32	1521317	0.00210344	24	273975	0.00875992
09010102	Parenteral Iron	32	1521317	0.00210344	12	273975	0.00437996
72045200	Zinc Paste And Ichthammol Bandage	32	1521317	0.00210344	14	273975	0.00510996
07040251	Nocturnal Enuresis	30	1521317	0.00197198	8	273975	0.00291997
07040300	Drugs Used In Urological Pain	29	1521317	0.00190624	7	273975	0.00255498
11065200	Sympathomimetics (In Glaucoma)	27	1521317	0.00177478	18	273975	0.00656994
71590700	Eye Drop Sodium Hyaluronate And Dexpanthenol Preservative Free	26	1521317	0.00170905	14	273975	0.00510996
04030201	Reversible Monoamine-Oxidase Inhibitors	25	1521317	0.00164331	25	273975	0.00912492
10010302	Drugs Affecting The Immune Response In Rheumatic Disease	25	1521317	0.00164331	18	273975	0.00656994
02060400	Peripheral Vasodilators And Related Products	24	1521317	0.00157758	15	273975	0.00547495
05010700	Other Antibacterials	24	1521317	0.00157758	10	273975	0.00364997
05011000	Antileprotic Drugs	24	1521317	0.00157758	11	273975	0.00401496
08030401	Breast Cancer	24	1521317	0.00157758	14	273975	0.00510996
13500100	Emollient Ointment	24	1521317	0.00157758	15	273975	0.00547495
71140100	Dry Mouth Products	24	1521317	0.00157758	13	273975	0.00474496
01030400	Prostaglandin Analogues	21	1521317	0.00138038	6	273975	0.00218998
09050103	Magnesium	21	1521317	0.00138038	9	273975	0.00328497
09050201	Phosphate Supplements	20	1521317	0.00131465	7	273975	0.00255498
03040300	Allergic Emergencies	19	1521317	0.00124892	5	273975	0.00182498
04020200	Antipsychotic Depot Injections	19	1521317	0.00124892	16	273975	0.00583995
12500300	Nasal Ointment	19	1521317	0.00124892	8	273975	0.00291997
02050504	Angiotensin-II Receptor Antagonists With Diuretic	18	1521317	0.00118319	15	273975	0.00547495
06050101	Anterior Pituitary Hormones - Growth Hormone	18	1521317	0.00118319	13	273975	0.00474496
04090300	Drugs For Essential Tremor	16	1521317	0.00105172	13	273975	0.00474496
13060300	Topical Preparations For Rosacea	16	1521317	0.00105172	11	273975	0.00401496
06040200	Male Sex Hormones And Antagonists	15	1521317	0.000985988	8	273975	0.00291997
02050100	Vasodilator Antihypertensive Products	14	1521317	0.000920255	8	273975	0.00291997
06070000	Other Endocrine Drugs	14	1521317	0.000920255	2	273975	0.000729994
08010000	Cytotoxic Drugs	14	1521317	0.000920255	9	273975	0.00328497
09050202	Phosphate-Binding Agents	14	1521317	0.000920255	11	273975	0.00401496
09080150	Wilson's Disease	14	1521317	0.000920255	6	273975	0.00218998
11065400	Miotics	14	1521317	0.000920255	5	273975	0.00182498
13110800	Soap Substitute	14	1521317	0.000920255	8	273975	0.00291997
05030150	Nucleoside Reverse Transcriptase Inhibitors	13	1521317	0.000854523	3	273975	0.00109499
11040000	Corticosteroids And Other Anti-Inflammatory Preparations (For The Eye)	13	1521317	0.000854523	3	273975	0.00109499
04030200	Monoamine-Oxidase Inhibitors (MAOI)	12	1521317	0.00078879	9	273975	0.00328497
05010400	Aminoglycosides	12	1521317	0.00078879	6	273975	0.00218998
07040500	Drugs For Erectile Dysfunction	12	1521317	0.00078879	9	273975	0.00328497
12010150	Astringent Preparations	12	1521317	0.00078879	4	273975	0.00145999
06010209	Gliptins Plus Metformin	11	1521317	0.000723058	11	273975	0.00401496
72214100	Soft Polymer Wound Contact Dressing Impregnated With Silver	11	1521317	0.000723058	4	273975	0.00145999
13090300	Androgenetic Alopecia	10	1521317	0.000657325	2	273975	0.000729994
01030600	Other Ulcer Healing Drugs	9	1521317	0.000591593	3	273975	0.00109499
01050400	Food Allergy	9	1521317	0.000591593	8	273975	0.00291997
03010102	Other Adrenoceptor Agonists	9	1521317	0.000591593	4	273975	0.00145999
06010208	Meglitinides (Glinides)	9	1521317	0.000591593	7	273975	0.00255498
11070000	Local Anaesthetics (For The Eye)	9	1521317	0.000591593	2	273975	0.000729994
72213700	Silver Impregnated Polyurethane Foam Film Dressing Without Adhesive Border	9	1521317	0.000591593	4	273975	0.00145999
02060401	Other Preparations Used In Peripheral Vascular Disease	8	1521317	0.00052586	4	273975	0.00145999
02070000	Sympathomimetics	8	1521317	0.00052586	5	273975	0.00182498
02120100	Bile Acid Sequestrants - Lipid-Regulating Products	8	1521317	0.00052586	4	273975	0.00145999
06010213	Glitazones Plus Metformin	8	1521317	0.00052586	5	273975	0.00182498
09010300	Drugs Used In Hypoplastic	8	1521317	0.00052586	2	273975	0.000729994
09050500	Selenium	8	1521317	0.00052586	4	273975	0.00145999
11050000	Mydriatics And Cycloplegics	8	1521317	0.00052586	6	273975	0.00218998
12010200	Drugs Acting On The Ear - Otitis Media	8	1521317	0.00052586	3	273975	0.00109499
14041000	Varicella-Zoster Vaccines	8	1521317	0.00052586	3	273975	0.00109499
06010203	Other Antidiabetic Products	7	1521317	0.000460128	4	273975	0.00145999
10010303	Gold Salts	6	1521317	0.000394395	5	273975	0.00182498
72213600	Silver Impregnated Polyurethane Foam Film Dressing With Adhesive Border	6	1521317	0.000394395	2	273975	0.000729994
04050200	Centrally Acting Apetite Suppressants	5	1521317	0.000328663	3	273975	0.00109499
04090400	Other Dopaminergic Drugs	5	1521317	0.000328663	3	273975	0.00109499
08030400	Hormone Antagonists (In Malignant Disease)	5	1521317	0.000328663	4	273975	0.00145999
10030200	Rubefacients	5	1521317	0.000328663	1	273975	0.000364997
13050101	Topical Preparations For Eczema	5	1521317	0.000328663	1	273975	0.000364997
14050100	Normal Immunoglobulin	5	1521317	0.000328663	3	273975	0.00109499
54010000	Therapy Of Acute Cyanide Poisoning	5	1521317	0.000328663	3	273975	0.00109499
71590800	Eye Drop Sodium Hyaluronate Preservative Free	5	1521317	0.000328663	1	273975	0.000364997
72213400	Silver Coated Barrier Sterile Dressing	5	1521317	0.000328663	4	273975	0.00145999
72215400	Antimicrobial Dressings	5	1521317	0.000328663	1	273975	0.000364997
08020402	Other Immunomodulating Drugs - Inteferon Alfa	4	1521317	0.00026293	3	273975	0.00109499
09010000	Anaemias And Some Other Blood Disorders	4	1521317	0.00026293	1	273975	0.000364997
09010350	Erythropoietins	4	1521317	0.00026293	4	273975	0.00145999
13100100	Antibacterial Preparations (For Skin Conditions)	4	1521317	0.00026293	0	273975	0
01060000	Laxatives	3	1521317	0.000197198	1	273975	0.000364997
05040400	Antigiardial Drugs	3	1521317	0.000197198	0	273975	0
07010200	Mifepristone	3	1521317	0.000197198	1	273975	0.000364997
08010500	Other Antineoplastic Drugs	3	1521317	0.000197198	2	273975	0.000729994
08015100	Chemotherapy-Induced Mucositis And Myelosuppression	3	1521317	0.000197198	0	273975	0
08030403	Somatostatin Analogues	3	1521317	0.000197198	0	273975	0
12030551	Systemic Treatment Of In Dry Mouth	3	1521317	0.000197198	2	273975	0.000729994
15010401	Benzodiazepines (Peri-Operative)	3	1521317	0.000197198	3	273975	0.00109499
72170800	Zinc Oxide Adhesive Tape	3	1521317	0.000197198	0	273975	0
04110000	Products For Dementia	2	1521317	0.000131465	2	273975	0.000729994
05010202	Carbapenems	2	1521317	0.000131465	2	273975	0.000729994
07040150	Alpha-Blockers (In Urinary Retention)	2	1521317	0.000131465	0	273975	0
07040151	Parasympathomimetics (In Urinary Retention)	2	1521317	0.000131465	1	273975	0.000364997
07040351	Other Preparation For Urinary Disorder	2	1521317	0.000131465	2	273975	0.000729994
08030200	Progestogens (In Malignant Disease)	2	1521317	0.000131465	0	273975	0
09080100	Drugs Used In Metabolic Disorders	2	1521317	0.000131465	1	273975	0.000364997
09080158	Urea Cycle Disorders	2	1521317	0.000131465	0	273975	0
10030252	Rubefacients And Other Topical Antirheumatics - Poultices	2	1521317	0.000131465	1	273975	0.000364997
11080000	Miscellaneous Ophthalmic Preparations	2	1521317	0.000131465	1	273975	0.000364997
13060203	Oral Retinoids For Acne	2	1521317	0.000131465	1	273975	0.000364997
14050200	Disease-Specific Immunoglobulin	2	1521317	0.000131465	1	273975	0.000364997
01060600	Peripheral Opioid-Receptor Antagonists	1	1521317	6.57325e-05	0	273975	0
01070300	Rectal Sclerosants	1	1521317	6.57325e-05	0	273975	0
02020800	Diuretics With Potassium	1	1521317	6.57325e-05	0	273975	0
02050503	Renin Inhibitors	1	1521317	6.57325e-05	1	273975	0.000364997
04010300	Barbiturates	1	1521317	6.57325e-05	1	273975	0.000364997
04080400	Other Antiepileptic Drugs	1	1521317	6.57325e-05	1	273975	0.000364997
04090000	Products Used For Parkinsonism And Related Disorders	1	1521317	6.57325e-05	1	273975	0.000364997
05020400	Echinocandin Antifungals	1	1521317	6.57325e-05	1	273975	0.000364997
05030100	HIV Infection	1	1521317	6.57325e-05	0	273975	0
05030151	Protease Inhibitors	1	1521317	6.57325e-05	0	273975	0
05050000	Anthelmintics	1	1521317	6.57325e-05	0	273975	0
07040501	Phosphodiesterase Type-5 Inhibitors	1	1521317	6.57325e-05	1	273975	0.000364997
08010100	Alkylating Drugs	1	1521317	6.57325e-05	0	273975	0
08010300	Antimetabolites	1	1521317	6.57325e-05	1	273975	0.000364997
08010600	Drugs For Cytotoxic-Induced Side Effects	1	1521317	6.57325e-05	1	273975	0.000364997
08020400	Other Immunomodulating Drugs	1	1521317	6.57325e-05	1	273975	0.000364997
09010100	Iron-Deficiency Anaemias	1	1521317	6.57325e-05	0	273975	0
09080155	Nephropathic Cystinosis	1	1521317	6.57325e-05	0	273975	0
10020100	Drugs Which Enhance Neuromuscular Transmission	1	1521317	6.57325e-05	0	273975	0
13050201	Oral Retinoids For Psoriasis	1	1521317	6.57325e-05	1	273975	0.000364997
72213901	Soft Polymer Wound Contact Dressing With Polyurethane Foam Film Backing With Antimicrobial Agents	1	1521317	6.57325e-05	0	273975	0
72215900	Soft Polymer Wound Contact Dressing With Polyurethane Foam Film Backing And Antimicrobial Agents	1	1521317	6.57325e-05	0	273975	0
00802400	-	0	1521317	0	0	273975	0
01010105	Sodium Citrate	0	1521317	0	0	273975	0
01030000	Antisecretion And Mucosal Protectant Products	0	1521317	0	0	273975	0
01030200	Selective Antimuscarinics	0	1521317	0	0	273975	0
01040000	Acute Diarrhoea	0	1521317	0	0	273975	0
01040300	Enkephalinase Inhibitors	0	1521317	0	0	273975	0
01050000	Chronic Bowel Problem Products	0	1521317	0	0	273975	0
01050301	Cytokine Modulators For Chronic Bowel Problems	0	1521317	0	0	273975	0
01055000	Inflammatory Bowel Disease	0	1521317	0	0	273975	0
01090150	Other Preparations For Biliary Disorders	0	1521317	0	0	273975	0
01100000	Other Anti-Diarrhoeal Products (Non-Acute)	0	1521317	0	0	273975	0
01500000	Gastro-Intestinal Lipase Inhibitor Products	0	1521317	0	0	273975	0
02020600	Mercurial Diuretics	0	1521317	0	0	273975	0
02025000	Other Diuretics	0	1521317	0	0	273975	0
02040100	Beta-Blockers With Diuretics	0	1521317	0	0	273975	0
02050000	Hypertension Or Heart Failure Products	0	1521317	0	0	273975	0
02050300	Adrenergic Neurone Blockers	0	1521317	0	0	273975	0
02065000	Other Products Used For Peripheral Vascular Disease	0	1521317	0	0	273975	0
02070100	Inotropic Sympathomimetics	0	1521317	0	0	273975	0
02070200	Vasoconstrictor Sympathomimetics	0	1521317	0	0	273975	0
02080000	Anticoagulants And Protamine	0	1521317	0	0	273975	0
02110100	Blood Related Products	0	1521317	0	0	273975	0
02120500	Nicotinic Acid Group	0	1521317	0	0	273975	0
02120700	Other Lipid-Regulating Products	0	1521317	0	0	273975	0
03030300	Phosphodiesterase Type 4 (PDE4) Inhibitors	0	1521317	0	0	273975	0
03040000	Antihistamines	0	1521317	0	0	273975	0
03040200	Allergen Immunotherapy	0	1521317	0	0	273975	0
03120000	Other Respiratory System Products	0	1521317	0	0	273975	0
03130000	Antifibrotics	0	1521317	0	0	273975	0
04010000	Hypnotics And Anxiolytics	0	1521317	0	0	273975	0
04065300	Products Used Against Nausea And Vertigo - Cytotoxic Chemotherapy	0	1521317	0	0	273975	0
04065700	Products Used Against Nausea And Vertigo - Neurokinin Receptor Antagonist	0	1521317	0	0	273975	0
04070000	Analgesics	0	1521317	0	0	273975	0
04070500	Other Non Opioid Analgesics	0	1521317	0	0	273975	0
04080101	Carbonic Anhydrase Inhibitors In Epilepsy	0	1521317	0	0	273975	0
04090101	Catechol-O-Methyltransferase Inhibitors	0	1521317	0	0	273975	0
04090102	Monoamine-Oxidase-B Inhibitors	0	1521317	0	0	273975	0
04130000	Other Nervous System Products	0	1521317	0	0	273975	0
05010104	Antipseudomonal Penicillins	0	1521317	0	0	273975	0
05010203	Other Beta-Lactam Antibiotics	0	1521317	0	0	273975	0
05020200	Imidazole Antifungals	0	1521317	0	0	273975	0
05030000	Antivirals	0	1521317	0	0	273975	0
05030152	Non-Nucleoside Reverse Transcriptase Inhibitors	0	1521317	0	0	273975	0
05030153	Other Antiretrovirals	0	1521317	0	0	273975	0
05030202	Cytomegalovirus Infection	0	1521317	0	0	273975	0
05030300	Viral Hepatitis	0	1521317	0	0	273975	0
05030301	Chronic Hepatitis B	0	1521317	0	0	273975	0
05030302	Chronic Hepatitis C	0	1521317	0	0	273975	0
05030500	Respiratory Syncytial Virus	0	1521317	0	0	273975	0
05040000	Antiprotozoals	0	1521317	0	0	273975	0
05040200	Amoebicides	0	1521317	0	0	273975	0
05040300	Trichomonacides	0	1521317	0	0	273975	0
05040500	Leishmaniacides	0	1521317	0	0	273975	0
05040800	Drugs For Pneumocystis Pneumonia	0	1521317	0	0	273975	0
05050200	Ascaricides	0	1521317	0	0	273975	0
05050300	Products For Tapeworm Infections	0	1521317	0	0	273975	0
05050400	Products For Hookworms	0	1521317	0	0	273975	0
05050500	Schistosomicides	0	1521317	0	0	273975	0
05050600	Filaricides	0	1521317	0	0	273975	0
05050700	Products For Cutaneous Larva Migrans	0	1521317	0	0	273975	0
06010100	Insulins	0	1521317	0	0	273975	0
06010210	Gliflozins Plus Metformin	0	1521317	0	0	273975	0
06010211	Gliflozins Plus Gliptins	0	1521317	0	0	273975	0
06020000	Thyroid And Antithyroid Products	0	1521317	0	0	273975	0
06040000	Sex Hormones	0	1521317	0	0	273975	0
06040201	Anti-Androgens	0	1521317	0	0	273975	0
06040300	Anabolic Steroids	0	1521317	0	0	273975	0
06050155	Growth Hormone Receptor Antagonists	0	1521317	0	0	273975	0
06050201	Posterior Pituitary Hormones	0	1521317	0	0	273975	0
06060100	Calcitonin And Parathyroid Hormone	0	1521317	0	0	273975	0
06070300	Trilostane	0	1521317	0	0	273975	0
06070400	Somatomedins	0	1521317	0	0	273975	0
06070500	Metyrapone	0	1521317	0	0	273975	0
07030101	Combined Hormonal Contraceptives - Standard Strength (Transdermal)	0	1521317	0	0	273975	0
07030500	Emergency Contraception	0	1521317	0	0	273975	0
07040000	Drugs For Genito-Urinary Disorders	0	1521317	0	0	273975	0
07040600	Drugs For Premature Ejaculation	0	1521317	0	0	273975	0
08010200	Anthracyclines And Other Cytotoxic Antibiotics	0	1521317	0	0	273975	0
08010400	Vinca Alkaloids And Etoposide	0	1521317	0	0	273975	0
08010550	Platinum Compounds	0	1521317	0	0	273975	0
08010551	Protein Kinase Inhibitors	0	1521317	0	0	273975	0
08010552	Taxanes	0	1521317	0	0	273975	0
08010553	Topoisomerase I Inhibitors	0	1521317	0	0	273975	0
08010554	Tretinoin	0	1521317	0	0	273975	0
08020300	Drugs Affecting The Immune Response - Rituximab And Alemtuzumab	0	1521317	0	0	273975	0
08020401	Other Immunomodulating Drugs - Interferon Gamma	0	1521317	0	0	273975	0
08020403	Other Immunomodulating Drugs - Interferon Beta	0	1521317	0	0	273975	0
08020404	Other Immunomodulating Drugs - Mifamurtide	0	1521317	0	0	273975	0
08020405	Lenalidomide And Thalidomide	0	1521317	0	0	273975	0
08020500	Anti-Lymphocyte Monoclonal Antibodies	0	1521317	0	0	273975	0
08030100	Oestrogens (In Malignant Disease)	0	1521317	0	0	273975	0
09010400	Drugs Used In Platelet Disorders	0	1521317	0	0	273975	0
09010401	Essential Thrombocythaemia	0	1521317	0	0	273975	0
09010402	Idiopathic Thrombocytopenic Purpura	0	1521317	0	0	273975	0
09010600	Drugs Used In Neutropenia	0	1521317	0	0	273975	0
09050000	Minerals	0	1521317	0	0	273975	0
09050102	Hypercalcaemia And Hypercalciuria	0	1521317	0	0	273975	0
09060000	Vitamins	0	1521317	0	0	273975	0
09070000	Bitters And Tonics	0	1521317	0	0	273975	0
09080151	Carnitine Deficiency	0	1521317	0	0	273975	0
09080152	Fabry's Disease	0	1521317	0	0	273975	0
09080153	Gaucher's Disease	0	1521317	0	0	273975	0
09080154	Mucopolysaccharidosis	0	1521317	0	0	273975	0
09080157	Tyrosinaemia Type 1	0	1521317	0	0	273975	0
09080159	Homocystinuria	0	1521317	0	0	273975	0
09080160	Other Metabolic Disorders	0	1521317	0	0	273975	0
09080161	Acute Porphyrias	0	1521317	0	0	273975	0
09100000	Trace Elements	0	1521317	0	0	273975	0
10010000	Drugs Used In Rheumatic Diseases And Gout	0	1521317	0	0	273975	0
10010301	Cytokine Modulators In Rheumatic Disease	0	1521317	0	0	273975	0
10010452	Hyperuricaemia Associated With Cytotoxic Drugs	0	1521317	0	0	273975	0
10020102	Acetylcholine-Release Enhancers	0	1521317	0	0	273975	0
10030000	Drugs For The Treatment Of Soft-Tissue Disorders And Topical Pain Relief	0	1521317	0	0	273975	0
10050000	Other Drugs For Disorders Of Musculoskeletal System	0	1521317	0	0	273975	0
11000000	Eye	0	1521317	0	0	273975	0
11010100	Antineovascularisation Agents	0	1521317	0	0	273975	0
11030000	Anti-Infective Eye Preparations	0	1521317	0	0	273975	0
11030200	Antifungals (In Eye Preperation)	0	1521317	0	0	273975	0
11050200	Sympathomimetics	0	1521317	0	0	273975	0
11060000	Treatment Of Glaucoma	0	1521317	0	0	273975	0
11080252	Subfoveal Choroidal Neovascularisation	0	1521317	0	0	273975	0
12010000	Drugs Acting On The Ear	0	1521317	0	0	273975	0
12500000	Miscellaneous Nasal Preparations	0	1521317	0	0	273975	0
12500100	Nasal Drops	0	1521317	0	0	273975	0
13050102	Oral Retinoid For Eczema	0	1521317	0	0	273975	0
13050203	Injection Preparations For Psoriasis	0	1521317	0	0	273975	0
13050350	Cytokine Modulators For Eczema And Psoriasis	0	1521317	0	0	273975	0
13100550	Collodion	0	1521317	0	0	273975	0
13500300	Skin Depigmentation	0	1521317	0	0	273975	0
14041200	Vaccines And Antisera - Bacillus Calmette Guerin Vaccine	0	1521317	0	0	273975	0
14050000	Immunoglobulins	0	1521317	0	0	273975	0
14050203	Disease-Specific Immunoglobulins - Tetanus	0	1521317	0	0	273975	0
15010403	Opioid Analgesics (In Anaesthesia)	0	1521317	0	0	273975	0
18010000	Miscellaneous Specials	0	1521317	0	0	273975	0
18020000	Other Therapeutic Products	0	1521317	0	0	273975	0
54070000	Therapy Of Poisoning By Heavy Metals	0	1521317	0	0	273975	0
57082900	-	0	1521317	0	0	273975	0
64050000	Surgical Preparations	0	1521317	0	0	273975	0
71210100	Inhalation Solution Sodium Chloride	0	1521317	0	0	273975	0
71380300	Nasal Spray Hypertonic	0	1521317	0	0	273975	0
71380600	Nasal Drops Glucose In Glycerol	0	1521317	0	0	273975	0
71450100	Synovial Fluid	0	1521317	0	0	273975	0
71520000	Vaginal Moisturiser	0	1521317	0	0	273975	0
71580400	Preparations For Treatment Of Radiation Induced Dermatitis	0	1521317	0	0	273975	0
71590200	Eye Drop Carmellose	0	1521317	0	0	273975	0
71590400	Eye Drop Hypromellose	0	1521317	0	0	273975	0
71590500	Eye Drop Hydroxypropyl Guar	0	1521317	0	0	273975	0
71590600	Eye Drop Sodium Hyaluronate	0	1521317	0	0	273975	0
71591000	Eye Gel - Carbomer	0	1521317	0	0	273975	0
71770000	Bladder Instillation	0	1521317	0	0	273975	0
72045100	Zinc Paste And Calamine Bandage	0	1521317	0	0	273975	0
72090000	Gauze Dressings (Impregnated)	0	1521317	0	0	273975	0
72170900	Zinc Oxide Adhesive Tape BP 1988	0	1521317	0	0	273975	0
72212100	Hydrocolloid Dressing Silver Impregnated Sterile	0	1521317	0	0	273975	0
72215600	Silver Paste	0	1521317	0	0	273975	0
72216400	Topical Haemoglobin	0	1521317	0	0	273975	0
72216500	Bioactive Soluble Beta-Glucan Gel	0	1521317	0	0	273975	0
