# Supplementary material for: Polypharmacy during pregnancy and associated risk factors: a retrospective analysis of 577 medication exposures among 1.5 million pregnancies in the UK, 2000-2019
Source: BMC Med. 2023 Jan 16;21:21. doi: 10.1186/s12916-022-02722-5 (PMC9843951; doi:10.1186/s12916-022-02722-5)
Supplement: Supplementary file 6 — Additional file 6: Table S3. Proportions of pregnancies with prescribed medication pairs – primary analysis. [file 12916_2022_2722_MOESM6_ESM.xlsx]

## Sheet: Trimester1
Medications prescribed in pairs				All Pregnancies			Pregnancies of women with active multimorbidity
(BNF chapter and section)		Description		Numerator	Denominator	Estimated prescription percentage	Numerator	Denominator	Estimated prescription percentage
Drug 1	Drug 2	Drug1	Drug 2
03010101	03020000	Selective Beta 2 Agonists	Corticosteroids (For Respiratory Conditions)	9721	812354	1.20%	4790	139471	3.43%
05010103	07020250	Broad-Spectrum Penicillins	Preparations For Vaginal And Vulval Candidiasis	6105	812354	0.75%	2020	139471	1.45%
04070100	05010103	Non-Opioid And Compound Analgesics	Broad-Spectrum Penicillins	6089	812354	0.75%	2321	139471	1.66%
03010101	05010103	Selective Beta 2 Agonists	Broad-Spectrum Penicillins	5785	812354	0.71%	2946	139471	2.11%
13020102	13040000	Emollient Skin Preparations	Topical Corticosteroids	5093	812354	0.63%	1992	139471	1.43%
04070100	10010100	Non-Opioid And Compound Analgesics	Non-Steroidal Anti-Inflammatory Drugs	4154	812354	0.51%	1567	139471	1.12%
04030300	04070100	Selective Serotonin Re-Uptake Inhibitors (SSRI)	Non-Opioid And Compound Analgesics	4136	812354	0.51%	3074	139471	2.20%
01010201	04070100	Compound Alginate Preparations	Non-Opioid And Compound Analgesics	3667	812354	0.45%	1558	139471	1.12%
04030300	05010103	Selective Serotonin Re-Uptake Inhibitors (SSRI)	Broad-Spectrum Penicillins	3595	812354	0.44%	2464	139471	1.77%
04070100	07020250	Non-Opioid And Compound Analgesics	Preparations For Vaginal And Vulval Candidiasis	3315	812354	0.41%	1426	139471	1.02%
05010103	05010201	Broad-Spectrum Penicillins	Cephalosporins	3314	812354	0.41%	1021	139471	0.73%
03010101	04070100	Selective Beta 2 Agonists	Non-Opioid And Compound Analgesics	3212	812354	0.40%	2103	139471	1.51%
01010201	05010103	Compound Alginate Preparations	Broad-Spectrum Penicillins	3131	812354	0.39%	1169	139471	0.84%
11040200	12020101	Other Anti-Inflammatory Eye Preparations (For The Eye)	Corticosteroids Used In Nasal Allergy	3015	812354	0.37%	1143	139471	0.82%
03010101	04030300	Selective Beta 2 Agonists	Selective Serotonin Re-Uptake Inhibitors (SSRI)	2933	812354	0.36%	2573	139471	1.84%
05010201	07020250	Cephalosporins	Preparations For Vaginal And Vulval Candidiasis	2877	812354	0.35%	881	139471	0.63%
04060000	04065400	Products Used Against Nausea And Vertigo	Products Used Against Nausea And Vertigo - Antihistamines	2836	812354	0.35%	886	139471	0.64%
04020101	04060000	First-Generation Antipsychotic Drugs	Products Used Against Nausea And Vertigo	2818	812354	0.35%	885	139471	0.63%
03010101	13040000	Selective Beta 2 Agonists	Topical Corticosteroids	2781	812354	0.34%	1920	139471	1.38%
05010103	13040000	Broad-Spectrum Penicillins	Topical Corticosteroids	2712	812354	0.33%	1143	139471	0.82%
03040101	12020101	Non-Sedating Antihistamines	Corticosteroids Used In Nasal Allergy	2668	812354	0.33%	1408	139471	1.01%
05010103	09010101	Broad-Spectrum Penicillins	Oral Iron	2651	812354	0.33%	773	139471	0.55%
04060000	05010103	Products Used Against Nausea And Vertigo	Broad-Spectrum Penicillins	2636	812354	0.32%	939	139471	0.67%
01030500	04070100	Proton Pump Inhibitors	Non-Opioid And Compound Analgesics	2611	812354	0.32%	1498	139471	1.07%
01060400	04070100	Osmotic Laxatives	Non-Opioid And Compound Analgesics	2599	812354	0.32%	1154	139471	0.83%
03010101	12020101	Selective Beta 2 Agonists	Corticosteroids Used In Nasal Allergy	2575	812354	0.32%	1850	139471	1.33%
07020250	13040000	Preparations For Vaginal And Vulval Candidiasis	Topical Corticosteroids	2572	812354	0.32%	1017	139471	0.73%
03010101	03040101	Selective Beta 2 Agonists	Non-Sedating Antihistamines	2559	812354	0.32%	1799	139471	1.29%
06010101	06010102	Short-Acting Insulins	Intermediate- And Long-Acting Insulins	2489	812354	0.31%	1804	139471	1.29%
01010201	07020250	Compound Alginate Preparations	Preparations For Vaginal And Vulval Candidiasis	2484	812354	0.31%	945	139471	0.68%
01060400	05010103	Osmotic Laxatives	Broad-Spectrum Penicillins	2468	812354	0.30%	922	139471	0.66%
01010201	01030500	Compound Alginate Preparations	Proton Pump Inhibitors	2449	812354	0.30%	1151	139471	0.83%
04030300	07020250	Selective Serotonin Re-Uptake Inhibitors (SSRI)	Preparations For Vaginal And Vulval Candidiasis	2421	812354	0.30%	1680	139471	1.20%
04070100	09010101	Non-Opioid And Compound Analgesics	Oral Iron	2373	812354	0.29%	822	139471	0.59%
03020000	05010103	Corticosteroids (For Respiratory Conditions)	Broad-Spectrum Penicillins	2369	812354	0.29%	1214	139471	0.87%
01010201	01060400	Compound Alginate Preparations	Osmotic Laxatives	2353	812354	0.29%	900	139471	0.65%
04060000	04065500	Products Used Against Nausea And Vertigo	Products Used Against Nausea And Vertigo - Domperidone & Metoclopramide	2351	812354	0.29%	768	139471	0.55%
04030300	04060000	Selective Serotonin Re-Uptake Inhibitors (SSRI)	Products Used Against Nausea And Vertigo	2288	812354	0.28%	1640	139471	1.18%
04060000	04070100	Products Used Against Nausea And Vertigo	Non-Opioid And Compound Analgesics	2224	812354	0.27%	1015	139471	0.73%
03010101	07020250	Selective Beta 2 Agonists	Preparations For Vaginal And Vulval Candidiasis	2219	812354	0.27%	1321	139471	0.95%
04070100	05010201	Non-Opioid And Compound Analgesics	Cephalosporins	2207	812354	0.27%	832	139471	0.60%
01050200	03010101	Corticosteroids In Chronic Bowel Problems	Selective Beta 2 Agonists	2202	812354	0.27%	1319	139471	0.95%
04070100	04070200	Non-Opioid And Compound Analgesics	Opioid Analgesics	2153	812354	0.27%	1325	139471	0.95%
01010201	09010101	Compound Alginate Preparations	Oral Iron	2151	812354	0.26%	638	139471	0.46%
04070100	13040000	Non-Opioid And Compound Analgesics	Topical Corticosteroids	2147	812354	0.26%	1062	139471	0.76%
05010103	12020101	Broad-Spectrum Penicillins	Corticosteroids Used In Nasal Allergy	2123	812354	0.26%	957	139471	0.69%
13020100	13040000	Emollients	Topical Corticosteroids	2076	812354	0.26%	829	139471	0.59%
01010201	04060000	Compound Alginate Preparations	Products Used Against Nausea And Vertigo	2070	812354	0.25%	706	139471	0.51%
04010100	04030300	Hypnotics	Selective Serotonin Re-Uptake Inhibitors (SSRI)	2054	812354	0.25%	1472	139471	1.06%
01060400	07020250	Osmotic Laxatives	Preparations For Vaginal And Vulval Candidiasis	2020	812354	0.25%	768	139471	0.55%
07020250	09010101	Preparations For Vaginal And Vulval Candidiasis	Oral Iron	1990	812354	0.24%	580	139471	0.42%
05010103	06040103	Broad-Spectrum Penicillins	Progestogen Products Doubling (In House Use)	1934	812354	0.24%	504	139471	0.36%
13020101	13040000	Emollient Bath Additives And Shower Preparations	Topical Corticosteroids	1932	812354	0.24%	911	139471	0.65%
04030300	06040103	Selective Serotonin Re-Uptake Inhibitors (SSRI)	Progestogen Products Doubling (In House Use)	1924	812354	0.24%	1074	139471	0.77%
01010201	03010101	Compound Alginate Preparations	Selective Beta 2 Agonists	1892	812354	0.23%	1171	139471	0.84%
04030300	13040000	Selective Serotonin Re-Uptake Inhibitors (SSRI)	Topical Corticosteroids	1851	812354	0.23%	1341	139471	0.96%
03040101	13040000	Non-Sedating Antihistamines	Topical Corticosteroids	1817	812354	0.22%	910	139471	0.65%
01010201	04030300	Compound Alginate Preparations	Selective Serotonin Re-Uptake Inhibitors (SSRI)	1812	812354	0.22%	1317	139471	0.94%
04020101	04065400	First-Generation Antipsychotic Drugs	Products Used Against Nausea And Vertigo - Antihistamines	1807	812354	0.22%	573	139471	0.41%
01030500	04030300	Proton Pump Inhibitors	Selective Serotonin Re-Uptake Inhibitors (SSRI)	1801	812354	0.22%	1484	139471	1.06%
13020101	13020102	Emollient Bath Additives And Shower Preparations	Emollient Skin Preparations	1761	812354	0.22%	761	139471	0.55%
03040101	11040200	Non-Sedating Antihistamines	Other Anti-Inflammatory Eye Preparations (For The Eye)	1757	812354	0.22%	806	139471	0.58%
05010103	10010100	Broad-Spectrum Penicillins	Non-Steroidal Anti-Inflammatory Drugs	1727	812354	0.21%	621	139471	0.45%
04065400	05010103	Products Used Against Nausea And Vertigo - Antihistamines	Broad-Spectrum Penicillins	1706	812354	0.21%	592	139471	0.42%
04030100	04070100	Tricyclic And Related Antidepressants	Non-Opioid And Compound Analgesics	1679	812354	0.21%	1114	139471	0.80%
04020101	05010103	First-Generation Antipsychotic Drugs	Broad-Spectrum Penicillins	1671	812354	0.21%	621	139471	0.45%
05010103	05011300	Broad-Spectrum Penicillins	Urinary-Tract Infections	1663	812354	0.20%	542	139471	0.39%
01060200	01060400	Stimulant Laxatives	Osmotic Laxatives	1640	812354	0.20%	651	139471	0.47%
04070100	06040103	Non-Opioid And Compound Analgesics	Progestogen Products Doubling (In House Use)	1602	812354	0.20%	583	139471	0.42%
01030500	05010103	Proton Pump Inhibitors	Broad-Spectrum Penicillins	1596	812354	0.20%	818	139471	0.59%
01060400	04030300	Osmotic Laxatives	Selective Serotonin Re-Uptake Inhibitors (SSRI)	1572	812354	0.19%	1173	139471	0.84%
01050200	05010103	Corticosteroids In Chronic Bowel Problems	Broad-Spectrum Penicillins	1572	812354	0.19%	880	139471	0.63%
01060400	04060000	Osmotic Laxatives	Products Used Against Nausea And Vertigo	1539	812354	0.19%	616	139471	0.44%
04020101	04070100	First-Generation Antipsychotic Drugs	Non-Opioid And Compound Analgesics	1522	812354	0.19%	679	139471	0.49%
04065400	04065500	Products Used Against Nausea And Vertigo - Antihistamines	Products Used Against Nausea And Vertigo - Domperidone & Metoclopramide	1499	812354	0.18%	456	139471	0.33%
04060000	04065600	Products Used Against Nausea And Vertigo	Products Used Against Nausea And Vertigo - 5 HT3 Antagonists	1499	812354	0.18%	480	139471	0.34%
04020101	04065500	First-Generation Antipsychotic Drugs	Products Used Against Nausea And Vertigo - Domperidone & Metoclopramide	1490	812354	0.18%	485	139471	0.35%
04030300	09010101	Selective Serotonin Re-Uptake Inhibitors (SSRI)	Oral Iron	1482	812354	0.18%	985	139471	0.71%
03010101	13020102	Selective Beta 2 Agonists	Emollient Skin Preparations	1476	812354	0.18%	1028	139471	0.74%
01010201	13040000	Compound Alginate Preparations	Topical Corticosteroids	1476	812354	0.18%	649	139471	0.47%
05010103	05010500	Broad-Spectrum Penicillins	Macrolides	1473	812354	0.18%	529	139471	0.38%
05010103	05010800	Broad-Spectrum Penicillins	Sulphonamides And Trimethoprim	1459	812354	0.18%	488	139471	0.35%
04060000	07020250	Products Used Against Nausea And Vertigo	Preparations For Vaginal And Vulval Candidiasis	1444	812354	0.18%	544	139471	0.39%
04010201	04030300	Benzodiazepines	Selective Serotonin Re-Uptake Inhibitors (SSRI)	1438	812354	0.18%	1123	139471	0.81%
04065400	04070100	Products Used Against Nausea And Vertigo - Antihistamines	Non-Opioid And Compound Analgesics	1426	812354	0.18%	605	139471	0.43%
01010201	04020101	Compound Alginate Preparations	First-Generation Antipsychotic Drugs	1424	812354	0.18%	471	139471	0.34%
01060400	09010101	Osmotic Laxatives	Oral Iron	1420	812354	0.17%	473	139471	0.34%
04020101	04030300	First-Generation Antipsychotic Drugs	Selective Serotonin Re-Uptake Inhibitors (SSRI)	1380	812354	0.17%	1006	139471	0.72%
01010201	05010201	Compound Alginate Preparations	Cephalosporins	1376	812354	0.17%	493	139471	0.35%
02040000	04030300	Beta-Adrenoceptor Blockers	Selective Serotonin Re-Uptake Inhibitors (SSRI)	1370	812354	0.17%	1067	139471	0.77%
03010101	04060000	Selective Beta 2 Agonists	Products Used Against Nausea And Vertigo	1368	812354	0.17%	869	139471	0.62%
04010201	04070100	Benzodiazepines	Non-Opioid And Compound Analgesics	1367	812354	0.17%	826	139471	0.59%
03010000	03020000	Bronchodilators	Corticosteroids (For Respiratory Conditions)	1354	812354	0.17%	656	139471	0.47%
03010101	05010500	Selective Beta 2 Agonists	Macrolides	1347	812354	0.17%	788	139471	0.56%
04060000	05010201	Products Used Against Nausea And Vertigo	Cephalosporins	1340	812354	0.16%	437	139471	0.31%
01010201	04065400	Compound Alginate Preparations	Products Used Against Nausea And Vertigo - Antihistamines	1332	812354	0.16%	438	139471	0.31%
03010101	05010201	Selective Beta 2 Agonists	Cephalosporins	1326	812354	0.16%	747	139471	0.54%
03040101	04070100	Non-Sedating Antihistamines	Non-Opioid And Compound Analgesics	1324	812354	0.16%	797	139471	0.57%
04030300	05010201	Selective Serotonin Re-Uptake Inhibitors (SSRI)	Cephalosporins	1324	812354	0.16%	896	139471	0.64%
03040101	05010103	Non-Sedating Antihistamines	Broad-Spectrum Penicillins	1323	812354	0.16%	681	139471	0.49%
01030500	03010101	Proton Pump Inhibitors	Selective Beta 2 Agonists	1317	812354	0.16%	995	139471	0.71%
04070100	05010101	Non-Opioid And Compound Analgesics	Benzylpenicillin And Phenoxymethylpenicillin	1305	812354	0.16%	397	139471	0.28%
01060100	01060400	Bulk-Forming Laxatives	Osmotic Laxatives	1304	812354	0.16%	473	139471	0.34%
03020000	04070100	Corticosteroids (For Respiratory Conditions)	Non-Opioid And Compound Analgesics	1298	812354	0.16%	835	139471	0.60%
01060400	03010101	Osmotic Laxatives	Selective Beta 2 Agonists	1293	812354	0.16%	848	139471	0.61%
06040103	07020250	Progestogen Products Doubling (In House Use)	Preparations For Vaginal And Vulval Candidiasis	1281	812354	0.16%	319	139471	0.23%
04030300	10010100	Selective Serotonin Re-Uptake Inhibitors (SSRI)	Non-Steroidal Anti-Inflammatory Drugs	1276	812354	0.16%	899	139471	0.64%
03040101	04030300	Non-Sedating Antihistamines	Selective Serotonin Re-Uptake Inhibitors (SSRI)	1265	812354	0.16%	1035	139471	0.74%
04070100	12020101	Non-Opioid And Compound Analgesics	Corticosteroids Used In Nasal Allergy	1257	812354	0.15%	712	139471	0.51%
06040101	06040102	Oestrogens And HRT	Progestogens And Progesterone Receptor Modulators	1256	812354	0.15%	398	139471	0.29%
05011300	07020250	Urinary-Tract Infections	Preparations For Vaginal And Vulval Candidiasis	1251	812354	0.15%	441	139471	0.32%
03010101	09010101	Selective Beta 2 Agonists	Oral Iron	1249	812354	0.15%	711	139471	0.51%
01060400	13040000	Osmotic Laxatives	Topical Corticosteroids	1238	812354	0.15%	574	139471	0.41%
04070100	05010500	Non-Opioid And Compound Analgesics	Macrolides	1233	812354	0.15%	550	139471	0.39%
01030500	04060000	Proton Pump Inhibitors	Products Used Against Nausea And Vertigo	1210	812354	0.15%	629	139471	0.45%
04010100	04070100	Hypnotics	Non-Opioid And Compound Analgesics	1204	812354	0.15%	779	139471	0.56%
04030300	04065400	Selective Serotonin Re-Uptake Inhibitors (SSRI)	Products Used Against Nausea And Vertigo - Antihistamines	1201	812354	0.15%	850	139471	0.61%
05010101	05010103	Benzylpenicillin And Phenoxymethylpenicillin	Broad-Spectrum Penicillins	1178	812354	0.15%	389	139471	0.28%
04065500	05010103	Products Used Against Nausea And Vertigo - Domperidone & Metoclopramide	Broad-Spectrum Penicillins	1171	812354	0.14%	446	139471	0.32%
03010101	06040103	Selective Beta 2 Agonists	Progestogen Products Doubling (In House Use)	1171	812354	0.14%	578	139471	0.41%
05010102	13040000	Penicillinase-Resistant Penicillins	Topical Corticosteroids	1170	812354	0.14%	432	139471	0.31%
09010101	13040000	Oral Iron	Topical Corticosteroids	1157	812354	0.14%	434	139471	0.31%
01060400	05010201	Osmotic Laxatives	Cephalosporins	1152	812354	0.14%	431	139471	0.31%
05010102	05010103	Penicillinase-Resistant Penicillins	Broad-Spectrum Penicillins	1150	812354	0.14%	445	139471	0.32%
04065500	04070100	Products Used Against Nausea And Vertigo - Domperidone & Metoclopramide	Non-Opioid And Compound Analgesics	1145	812354	0.14%	493	139471	0.35%
03020000	13040000	Corticosteroids (For Respiratory Conditions)	Topical Corticosteroids	1144	812354	0.14%	761	139471	0.55%
01010201	01030100	Compound Alginate Preparations	H2-Receptor Antagonists	1141	812354	0.14%	460	139471	0.33%
01040200	04070100	Antimotility Products	Non-Opioid And Compound Analgesics	1122	812354	0.14%	564	139471	0.40%
03020000	04030300	Corticosteroids (For Respiratory Conditions)	Selective Serotonin Re-Uptake Inhibitors (SSRI)	1121	812354	0.14%	983	139471	0.70%
04030300	06020100	Selective Serotonin Re-Uptake Inhibitors (SSRI)	Thyroid Hormones	1119	812354	0.14%	1051	139471	0.75%
03020000	12020101	Corticosteroids (For Respiratory Conditions)	Corticosteroids Used In Nasal Allergy	1119	812354	0.14%	777	139471	0.56%
05010103	06020100	Broad-Spectrum Penicillins	Thyroid Hormones	1116	812354	0.14%	744	139471	0.53%
03040102	13040000	Sedating Antihistamines	Topical Corticosteroids	1109	812354	0.14%	458	139471	0.33%
04030100	04030300	Tricyclic And Related Antidepressants	Selective Serotonin Re-Uptake Inhibitors (SSRI)	1100	812354	0.14%	840	139471	0.60%
05010103	13020102	Broad-Spectrum Penicillins	Emollient Skin Preparations	1097	812354	0.14%	486	139471	0.35%
01010201	04065500	Compound Alginate Preparations	Products Used Against Nausea And Vertigo - Domperidone & Metoclopramide	1087	812354	0.13%	384	139471	0.28%
03010000	03010101	Bronchodilators	Selective Beta 2 Agonists	1073	812354	0.13%	616	139471	0.44%
04030300	04070200	Selective Serotonin Re-Uptake Inhibitors (SSRI)	Opioid Analgesics	1071	812354	0.13%	908	139471	0.65%
05010201	09010101	Cephalosporins	Oral Iron	1070	812354	0.13%	332	139471	0.24%
04060000	09010101	Products Used Against Nausea And Vertigo	Oral Iron	1064	812354	0.13%	346	139471	0.25%
05011100	07020250	Metronidazole And Tinidazole	Preparations For Vaginal And Vulval Candidiasis	1058	812354	0.13%	313	139471	0.22%
05010201	13040000	Cephalosporins	Topical Corticosteroids	1052	812354	0.13%	417	139471	0.30%
04105100	05010103	Substance Dependence - Nicotine Dependence	Broad-Spectrum Penicillins	1045	812354	0.13%	382	139471	0.27%
07020250	12020101	Preparations For Vaginal And Vulval Candidiasis	Corticosteroids Used In Nasal Allergy	1045	812354	0.13%	515	139471	0.37%
05010800	07020250	Sulphonamides And Trimethoprim	Preparations For Vaginal And Vulval Candidiasis	1041	812354	0.13%	375	139471	0.27%
04070100	05010102	Non-Opioid And Compound Analgesics	Penicillinase-Resistant Penicillins	1035	812354	0.13%	430	139471	0.31%
04060000	05011300	Products Used Against Nausea And Vertigo	Urinary-Tract Infections	1029	812354	0.13%	381	139471	0.27%
05010101	07020250	Benzylpenicillin And Phenoxymethylpenicillin	Preparations For Vaginal And Vulval Candidiasis	1029	812354	0.13%	316	139471	0.23%
05020100	07020250	Triazole Antifungals	Preparations For Vaginal And Vulval Candidiasis	1014	812354	0.12%	350	139471	0.25%
03010101	11040200	Selective Beta 2 Agonists	Other Anti-Inflammatory Eye Preparations (For The Eye)	1011	812354	0.12%	646	139471	0.46%
05010201	05010800	Cephalosporins	Sulphonamides And Trimethoprim	1010	812354	0.12%	299	139471	0.21%
04020101	07020250	First-Generation Antipsychotic Drugs	Preparations For Vaginal And Vulval Candidiasis	1007	812354	0.12%	384	139471	0.28%
06040103	13040000	Progestogen Products Doubling (In House Use)	Topical Corticosteroids	998	812354	0.12%	309	139471	0.22%
04070100	05011300	Non-Opioid And Compound Analgesics	Urinary-Tract Infections	996	812354	0.12%	475	139471	0.34%
13020103	13040000	Antimicrobial Emollients	Topical Corticosteroids	996	812354	0.12%	418	139471	0.30%
05010500	07020250	Macrolides	Preparations For Vaginal And Vulval Candidiasis	988	812354	0.12%	376	139471	0.27%
01060400	01070200	Osmotic Laxatives	Compound Haemorrhoid Products With Corticosteroids	987	812354	0.12%	321	139471	0.23%
04070100	06020100	Non-Opioid And Compound Analgesics	Thyroid Hormones	986	812354	0.12%	733	139471	0.53%
04030400	04070100	Other Antidepressants	Non-Opioid And Compound Analgesics	984	812354	0.12%	816	139471	0.59%
04070100	13020102	Non-Opioid And Compound Analgesics	Emollient Skin Preparations	983	812354	0.12%	505	139471	0.36%
04010100	05010103	Hypnotics	Broad-Spectrum Penicillins	973	812354	0.12%	513	139471	0.37%
01030500	01060400	Proton Pump Inhibitors	Osmotic Laxatives	972	812354	0.12%	587	139471	0.42%
12020101	13040000	Corticosteroids Used In Nasal Allergy	Topical Corticosteroids	972	812354	0.12%	557	139471	0.40%
03020000	07020250	Corticosteroids (For Respiratory Conditions)	Preparations For Vaginal And Vulval Candidiasis	971	812354	0.12%	557	139471	0.40%
02090000	05010103	Antiplatelet Products	Broad-Spectrum Penicillins	969	812354	0.12%	417	139471	0.30%
05010201	05011300	Cephalosporins	Urinary-Tract Infections	966	812354	0.12%	296	139471	0.21%
04065400	07020250	Products Used Against Nausea And Vertigo - Antihistamines	Preparations For Vaginal And Vulval Candidiasis	965	812354	0.12%	381	139471	0.27%
01010201	12020101	Compound Alginate Preparations	Corticosteroids Used In Nasal Allergy	957	812354	0.12%	524	139471	0.38%
03020000	03040101	Corticosteroids (For Respiratory Conditions)	Non-Sedating Antihistamines	956	812354	0.12%	639	139471	0.46%
04030300	12020101	Selective Serotonin Re-Uptake Inhibitors (SSRI)	Corticosteroids Used In Nasal Allergy	956	812354	0.12%	783	139471	0.56%
04070100	05010800	Non-Opioid And Compound Analgesics	Sulphonamides And Trimethoprim	955	812354	0.12%	403	139471	0.29%
01030500	07020250	Proton Pump Inhibitors	Preparations For Vaginal And Vulval Candidiasis	955	812354	0.12%	539	139471	0.39%
04010100	04060000	Hypnotics	Products Used Against Nausea And Vertigo	950	812354	0.12%	401	139471	0.29%
07020250	10010100	Preparations For Vaginal And Vulval Candidiasis	Non-Steroidal Anti-Inflammatory Drugs	948	812354	0.12%	361	139471	0.26%
03040101	13020102	Non-Sedating Antihistamines	Emollient Skin Preparations	948	812354	0.12%	484	139471	0.35%
07020250	13020102	Preparations For Vaginal And Vulval Candidiasis	Emollient Skin Preparations	942	812354	0.12%	384	139471	0.28%
04060000	13040000	Products Used Against Nausea And Vertigo	Topical Corticosteroids	935	812354	0.12%	420	139471	0.30%
04070100	04105100	Non-Opioid And Compound Analgesics	Substance Dependence - Nicotine Dependence	933	812354	0.11%	405	139471	0.29%
02090000	04070100	Antiplatelet Products	Non-Opioid And Compound Analgesics	928	812354	0.11%	526	139471	0.38%
05010103	05011100	Broad-Spectrum Penicillins	Metronidazole And Tinidazole	927	812354	0.11%	283	139471	0.20%
05010102	07020250	Penicillinase-Resistant Penicillins	Preparations For Vaginal And Vulval Candidiasis	919	812354	0.11%	311	139471	0.22%
04030300	04030400	Selective Serotonin Re-Uptake Inhibitors (SSRI)	Other Antidepressants	914	812354	0.11%	700	139471	0.50%
01060400	04020101	Osmotic Laxatives	First-Generation Antipsychotic Drugs	912	812354	0.11%	342	139471	0.25%
01030100	04060000	H2-Receptor Antagonists	Products Used Against Nausea And Vertigo	908	812354	0.11%	340	139471	0.24%
01050200	03020000	Corticosteroids In Chronic Bowel Problems	Corticosteroids (For Respiratory Conditions)	900	812354	0.11%	467	139471	0.33%
03010101	06020100	Selective Beta 2 Agonists	Thyroid Hormones	888	812354	0.11%	802	139471	0.58%
04070200	10010100	Opioid Analgesics	Non-Steroidal Anti-Inflammatory Drugs	884	812354	0.11%	499	139471	0.36%
05010103	11030100	Broad-Spectrum Penicillins	Antibacterials (In Eye Preparation)	875	812354	0.11%	265	139471	0.19%
03010101	03030200	Selective Beta 2 Agonists	Leukotriene Receptor Antagonists	873	812354	0.11%	629	139471	0.45%
03010101	03040102	Selective Beta 2 Agonists	Sedating Antihistamines	873	812354	0.11%	568	139471	0.41%
04030300	04065500	Selective Serotonin Re-Uptake Inhibitors (SSRI)	Products Used Against Nausea And Vertigo - Domperidone & Metoclopramide	873	812354	0.11%	623	139471	0.45%
03010101	04065400	Selective Beta 2 Agonists	Products Used Against Nausea And Vertigo - Antihistamines	871	812354	0.11%	533	139471	0.38%
02040000	04070100	Beta-Adrenoceptor Blockers	Non-Opioid And Compound Analgesics	871	812354	0.11%	616	139471	0.44%
03010101	04020101	Selective Beta 2 Agonists	First-Generation Antipsychotic Drugs	864	812354	0.11%	519	139471	0.37%
06020100	09010101	Thyroid Hormones	Oral Iron	861	812354	0.11%	513	139471	0.37%
01010201	10010100	Compound Alginate Preparations	Non-Steroidal Anti-Inflammatory Drugs	860	812354	0.11%	373	139471	0.27%
01060400	04065400	Osmotic Laxatives	Products Used Against Nausea And Vertigo - Antihistamines	857	812354	0.11%	319	139471	0.23%
04030300	05011300	Selective Serotonin Re-Uptake Inhibitors (SSRI)	Urinary-Tract Infections	854	812354	0.11%	628	139471	0.45%
06040103	10010100	Progestogen Products Doubling (In House Use)	Non-Steroidal Anti-Inflammatory Drugs	851	812354	0.10%	237	139471	0.17%
04070200	05010103	Opioid Analgesics	Broad-Spectrum Penicillins	843	812354	0.10%	517	139471	0.37%
03040101	07020250	Non-Sedating Antihistamines	Preparations For Vaginal And Vulval Candidiasis	837	812354	0.10%	420	139471	0.30%
03010101	10010100	Selective Beta 2 Agonists	Non-Steroidal Anti-Inflammatory Drugs	828	812354	0.10%	549	139471	0.39%
04020101	05010201	First-Generation Antipsychotic Drugs	Cephalosporins	822	812354	0.10%	263	139471	0.19%
01030500	10010100	Proton Pump Inhibitors	Non-Steroidal Anti-Inflammatory Drugs	821	812354	0.10%	469	139471	0.34%
01030500	09010101	Proton Pump Inhibitors	Oral Iron	819	812354	0.10%	431	139471	0.31%
04030300	04105100	Selective Serotonin Re-Uptake Inhibitors (SSRI)	Substance Dependence - Nicotine Dependence	813	812354	0.10%	560	139471	0.40%
01030500	04065500	Proton Pump Inhibitors	Products Used Against Nausea And Vertigo - Domperidone & Metoclopramide	809	812354	0.10%	406	139471	0.29%
01030100	01030500	H2-Receptor Antagonists	Proton Pump Inhibitors	806	812354	0.10%	421	139471	0.30%
06020100	07020250	Thyroid Hormones	Preparations For Vaginal And Vulval Candidiasis	806	812354	0.10%	536	139471	0.38%
01010201	03020000	Compound Alginate Preparations	Corticosteroids (For Respiratory Conditions)	801	812354	0.10%	497	139471	0.36%
04065400	05010201	Products Used Against Nausea And Vertigo - Antihistamines	Cephalosporins	798	812354	0.10%	280	139471	0.20%
02090000	04030300	Antiplatelet Products	Selective Serotonin Re-Uptake Inhibitors (SSRI)	794	812354	0.10%	590	139471	0.42%
04030300	13020102	Selective Serotonin Re-Uptake Inhibitors (SSRI)	Emollient Skin Preparations	791	812354	0.10%	591	139471	0.42%
10010100	13040000	Non-Steroidal Anti-Inflammatory Drugs	Topical Corticosteroids	774	812354	0.10%	345	139471	0.25%
01030500	04070200	Proton Pump Inhibitors	Opioid Analgesics	773	812354	0.10%	582	139471	0.42%
04030300	05010500	Selective Serotonin Re-Uptake Inhibitors (SSRI)	Macrolides	769	812354	0.09%	560	139471	0.40%
05010800	05011300	Sulphonamides And Trimethoprim	Urinary-Tract Infections	768	812354	0.09%	237	139471	0.17%
06010102	06010400	Intermediate- And Long-Acting Insulins	Treatment Of Hypoglycaemia	767	812354	0.09%	563	139471	0.40%
01010201	03040101	Compound Alginate Preparations	Non-Sedating Antihistamines	762	812354	0.09%	420	139471	0.30%
03040101	03040102	Non-Sedating Antihistamines	Sedating Antihistamines	759	812354	0.09%	360	139471	0.26%
03040102	05010103	Sedating Antihistamines	Broad-Spectrum Penicillins	758	812354	0.09%	310	139471	0.22%
06010101	06010400	Short-Acting Insulins	Treatment Of Hypoglycaemia	758	812354	0.09%	569	139471	0.41%
01010201	13020102	Compound Alginate Preparations	Emollient Skin Preparations	751	812354	0.09%	327	139471	0.23%
04030100	04070200	Tricyclic And Related Antidepressants	Opioid Analgesics	745	812354	0.09%	571	139471	0.41%
04070100	04070401	Non-Opioid And Compound Analgesics	Acute Migraine	743	812354	0.09%	433	139471	0.31%
04030300	05010102	Selective Serotonin Re-Uptake Inhibitors (SSRI)	Penicillinase-Resistant Penicillins	740	812354	0.09%	505	139471	0.36%
05010201	06040103	Cephalosporins	Progestogen Products Doubling (In House Use)	739	812354	0.09%	192	139471	0.14%
04020102	04030300	Second-Generation Antipsychotic Drugs	Selective Serotonin Re-Uptake Inhibitors (SSRI)	738	812354	0.09%	682	139471	0.49%
03010101	04070200	Selective Beta 2 Agonists	Opioid Analgesics	737	812354	0.09%	614	139471	0.44%
04030100	05010103	Tricyclic And Related Antidepressants	Broad-Spectrum Penicillins	736	812354	0.09%	511	139471	0.37%
04070100	10030250	Non-Opioid And Compound Analgesics	Topical Nsaids And Counter Irritants	734	812354	0.09%	327	139471	0.23%
01030100	04070100	H2-Receptor Antagonists	Non-Opioid And Compound Analgesics	732	812354	0.09%	383	139471	0.27%
01060400	10010100	Osmotic Laxatives	Non-Steroidal Anti-Inflammatory Drugs	728	812354	0.09%	340	139471	0.24%
04010100	04010201	Hypnotics	Benzodiazepines	721	812354	0.09%	596	139471	0.43%
03040102	04070100	Sedating Antihistamines	Non-Opioid And Compound Analgesics	716	812354	0.09%	373	139471	0.27%
01020200	04070100	Other Antispasmodics	Non-Opioid And Compound Analgesics	714	812354	0.09%	406	139471	0.29%
01010201	06020100	Compound Alginate Preparations	Thyroid Hormones	710	812354	0.09%	489	139471	0.35%
01030500	13040000	Proton Pump Inhibitors	Topical Corticosteroids	702	812354	0.09%	420	139471	0.30%
06040103	09010101	Progestogen Products Doubling (In House Use)	Oral Iron	700	812354	0.09%	146	139471	0.10%
13020100	13020102	Emollients	Emollient Skin Preparations	699	812354	0.09%	323	139471	0.23%
05010500	13040000	Macrolides	Topical Corticosteroids	699	812354	0.09%	326	139471	0.23%
03010101	04105100	Selective Beta 2 Agonists	Substance Dependence - Nicotine Dependence	697	812354	0.09%	402	139471	0.29%
04105100	07020250	Substance Dependence - Nicotine Dependence	Preparations For Vaginal And Vulval Candidiasis	695	812354	0.09%	271	139471	0.19%
04065500	07020250	Products Used Against Nausea And Vertigo - Domperidone & Metoclopramide	Preparations For Vaginal And Vulval Candidiasis	694	812354	0.09%	274	139471	0.20%
01060400	04065500	Osmotic Laxatives	Products Used Against Nausea And Vertigo - Domperidone & Metoclopramide	691	812354	0.09%	287	139471	0.21%
04030300	05010800	Selective Serotonin Re-Uptake Inhibitors (SSRI)	Sulphonamides And Trimethoprim	689	812354	0.08%	457	139471	0.33%
13020100	13020101	Emollients	Emollient Bath Additives And Shower Preparations	688	812354	0.08%	307	139471	0.22%
03010101	04010100	Selective Beta 2 Agonists	Hypnotics	687	812354	0.08%	537	139471	0.39%
09010101	09060400	Oral Iron	Vitamin D	687	812354	0.08%	226	139471	0.16%
09010101	10010100	Oral Iron	Non-Steroidal Anti-Inflammatory Drugs	686	812354	0.08%	241	139471	0.17%
06020100	13040000	Thyroid Hormones	Topical Corticosteroids	686	812354	0.08%	478	139471	0.34%
03010101	13020101	Selective Beta 2 Agonists	Emollient Bath Additives And Shower Preparations	683	812354	0.08%	526	139471	0.38%
01010201	01060100	Compound Alginate Preparations	Bulk-Forming Laxatives	681	812354	0.08%	274	139471	0.20%
04010100	04020101	Hypnotics	First-Generation Antipsychotic Drugs	681	812354	0.08%	332	139471	0.24%
04070100	13020100	Non-Opioid And Compound Analgesics	Emollients	680	812354	0.08%	303	139471	0.22%
05010103	12010151	Broad-Spectrum Penicillins	Anti-Inflammatory Preparations	677	812354	0.08%	225	139471	0.16%
04020101	09010101	First-Generation Antipsychotic Drugs	Oral Iron	675	812354	0.08%	209	139471	0.15%
03010101	05011300	Selective Beta 2 Agonists	Urinary-Tract Infections	674	812354	0.08%	405	139471	0.29%
04020101	13040000	First-Generation Antipsychotic Drugs	Topical Corticosteroids	673	812354	0.08%	308	139471	0.22%
01030500	04030100	Proton Pump Inhibitors	Tricyclic And Related Antidepressants	669	812354	0.08%	498	139471	0.36%
01060100	05010103	Bulk-Forming Laxatives	Broad-Spectrum Penicillins	669	812354	0.08%	286	139471	0.21%
01030500	04020101	Proton Pump Inhibitors	First-Generation Antipsychotic Drugs	668	812354	0.08%	325	139471	0.23%
13040000	13090000	Topical Corticosteroids	Shampoos And Other Preparations For Scalp And Hair Conditions	667	812354	0.08%	318	139471	0.23%
01040200	05010103	Antimotility Products	Broad-Spectrum Penicillins	666	812354	0.08%	317	139471	0.23%
01030500	03040101	Proton Pump Inhibitors	Non-Sedating Antihistamines	661	812354	0.08%	484	139471	0.35%
13040000	71580200	Topical Corticosteroids	Emollient Ointment	659	812354	0.08%	279	139471	0.20%
05010201	05010500	Cephalosporins	Macrolides	653	812354	0.08%	260	139471	0.19%
05010201	10010100	Cephalosporins	Non-Steroidal Anti-Inflammatory Drugs	653	812354	0.08%	242	139471	0.17%
03010101	04030100	Selective Beta 2 Agonists	Tricyclic And Related Antidepressants	651	812354	0.08%	565	139471	0.41%
01010201	04010100	Compound Alginate Preparations	Hypnotics	649	812354	0.08%	324	139471	0.23%
01060100	04070100	Bulk-Forming Laxatives	Non-Opioid And Compound Analgesics	645	812354	0.08%	321	139471	0.23%
04020101	04065600	First-Generation Antipsychotic Drugs	Products Used Against Nausea And Vertigo - 5 HT3 Antagonists	643	812354	0.08%	205	139471	0.15%
03040101	06040103	Non-Sedating Antihistamines	Progestogen Products Doubling (In House Use)	643	812354	0.08%	231	139471	0.17%
04010201	04070200	Benzodiazepines	Opioid Analgesics	642	812354	0.08%	511	139471	0.37%
04030300	05010101	Selective Serotonin Re-Uptake Inhibitors (SSRI)	Benzylpenicillin And Phenoxymethylpenicillin	640	812354	0.08%	430	139471	0.31%
03040102	04030300	Sedating Antihistamines	Selective Serotonin Re-Uptake Inhibitors (SSRI)	635	812354	0.08%	470	139471	0.34%
01030500	04065400	Proton Pump Inhibitors	Products Used Against Nausea And Vertigo - Antihistamines	633	812354	0.08%	289	139471	0.21%
04010201	05010103	Benzodiazepines	Broad-Spectrum Penicillins	632	812354	0.08%	436	139471	0.31%
01010201	05010500	Compound Alginate Preparations	Macrolides	631	812354	0.08%	277	139471	0.20%
04065400	09010101	Products Used Against Nausea And Vertigo - Antihistamines	Oral Iron	630	812354	0.08%	213	139471	0.15%
05010800	06040103	Sulphonamides And Trimethoprim	Progestogen Products Doubling (In House Use)	628	812354	0.08%	147	139471	0.11%
02090000	07020250	Antiplatelet Products	Preparations For Vaginal And Vulval Candidiasis	627	812354	0.08%	271	139471	0.19%
03010101	04065500	Selective Beta 2 Agonists	Products Used Against Nausea And Vertigo - Domperidone & Metoclopramide	624	812354	0.08%	385	139471	0.28%
03040102	13020102	Sedating Antihistamines	Emollient Skin Preparations	624	812354	0.08%	275	139471	0.20%
01060400	05011300	Osmotic Laxatives	Urinary-Tract Infections	622	812354	0.08%	264	139471	0.19%
04010100	04030400	Hypnotics	Other Antidepressants	621	812354	0.08%	534	139471	0.38%
04010100	07020250	Hypnotics	Preparations For Vaginal And Vulval Candidiasis	621	812354	0.08%	320	139471	0.23%
01060400	12020101	Osmotic Laxatives	Corticosteroids Used In Nasal Allergy	621	812354	0.08%	358	139471	0.26%
02090000	04060000	Antiplatelet Products	Products Used Against Nausea And Vertigo	620	812354	0.08%	259	139471	0.19%
04030400	05010103	Other Antidepressants	Broad-Spectrum Penicillins	619	812354	0.08%	515	139471	0.37%
02090000	03010101	Antiplatelet Products	Selective Beta 2 Agonists	618	812354	0.08%	406	139471	0.29%
07020250	13020100	Preparations For Vaginal And Vulval Candidiasis	Emollients	618	812354	0.08%	254	139471	0.18%
03010101	05010102	Selective Beta 2 Agonists	Penicillinase-Resistant Penicillins	617	812354	0.08%	379	139471	0.27%
04065400	13040000	Products Used Against Nausea And Vertigo - Antihistamines	Topical Corticosteroids	616	812354	0.08%	262	139471	0.19%
04065400	04065600	Products Used Against Nausea And Vertigo - Antihistamines	Products Used Against Nausea And Vertigo - 5 HT3 Antagonists	613	812354	0.08%	208	139471	0.15%
03010101	05010101	Selective Beta 2 Agonists	Benzylpenicillin And Phenoxymethylpenicillin	612	812354	0.08%	307	139471	0.22%
01010201	06040103	Compound Alginate Preparations	Progestogen Products Doubling (In House Use)	607	812354	0.07%	200	139471	0.14%
01060100	07020250	Bulk-Forming Laxatives	Preparations For Vaginal And Vulval Candidiasis	607	812354	0.07%	230	139471	0.16%
02080100	02090000	Parenteral Anticoagulants	Antiplatelet Products	604	812354	0.07%	245	139471	0.18%
01060400	06020100	Osmotic Laxatives	Thyroid Hormones	604	812354	0.07%	402	139471	0.29%
01050200	04070100	Corticosteroids In Chronic Bowel Problems	Non-Opioid And Compound Analgesics	602	812354	0.07%	430	139471	0.31%
01060400	06040103	Osmotic Laxatives	Progestogen Products Doubling (In House Use)	602	812354	0.07%	210	139471	0.15%
02040000	05010103	Beta-Adrenoceptor Blockers	Broad-Spectrum Penicillins	601	812354	0.07%	392	139471	0.28%
09010101	12020101	Oral Iron	Corticosteroids Used In Nasal Allergy	601	812354	0.07%	277	139471	0.20%
01060400	13020102	Osmotic Laxatives	Emollient Skin Preparations	601	812354	0.07%	295	139471	0.21%
01030500	05010201	Proton Pump Inhibitors	Cephalosporins	599	812354	0.07%	328	139471	0.24%
03040102	12020101	Sedating Antihistamines	Corticosteroids Used In Nasal Allergy	599	812354	0.07%	285	139471	0.20%
03010101	13020100	Selective Beta 2 Agonists	Emollients	596	812354	0.07%	429	139471	0.31%
03040101	09010101	Non-Sedating Antihistamines	Oral Iron	595	812354	0.07%	293	139471	0.21%
04065400	05011300	Products Used Against Nausea And Vertigo - Antihistamines	Urinary-Tract Infections	592	812354	0.07%	198	139471	0.14%
01010201	02090000	Compound Alginate Preparations	Antiplatelet Products	591	812354	0.07%	293	139471	0.21%
05010103	13020100	Broad-Spectrum Penicillins	Emollients	589	812354	0.07%	251	139471	0.18%
02090000	06040102	Antiplatelet Products	Progestogens And Progesterone Receptor Modulators	588	812354	0.07%	204	139471	0.15%
03010000	05010103	Bronchodilators	Broad-Spectrum Penicillins	587	812354	0.07%	302	139471	0.22%
11040200	13040000	Other Anti-Inflammatory Eye Preparations (For The Eye)	Topical Corticosteroids	587	812354	0.07%	308	139471	0.22%
04065500	05010201	Products Used Against Nausea And Vertigo - Domperidone & Metoclopramide	Cephalosporins	586	812354	0.07%	204	139471	0.15%
04060000	12020101	Products Used Against Nausea And Vertigo	Corticosteroids Used In Nasal Allergy	584	812354	0.07%	314	139471	0.23%
04030100	10010100	Tricyclic And Related Antidepressants	Non-Steroidal Anti-Inflammatory Drugs	581	812354	0.07%	346	139471	0.25%
04070100	05011100	Non-Opioid And Compound Analgesics	Metronidazole And Tinidazole	578	812354	0.07%	244	139471	0.17%
03040102	07020250	Sedating Antihistamines	Preparations For Vaginal And Vulval Candidiasis	578	812354	0.07%	262	139471	0.19%
01030500	12020101	Proton Pump Inhibitors	Corticosteroids Used In Nasal Allergy	578	812354	0.07%	402	139471	0.29%
04010100	04065400	Hypnotics	Products Used Against Nausea And Vertigo - Antihistamines	576	812354	0.07%	241	139471	0.17%
01060400	03040101	Osmotic Laxatives	Non-Sedating Antihistamines	572	812354	0.07%	341	139471	0.24%
05010103	11040200	Broad-Spectrum Penicillins	Other Anti-Inflammatory Eye Preparations (For The Eye)	572	812354	0.07%	253	139471	0.18%
05010101	13040000	Benzylpenicillin And Phenoxymethylpenicillin	Topical Corticosteroids	563	812354	0.07%	216	139471	0.15%
06010102	06010202	Intermediate- And Long-Acting Insulins	Biguanides (Metformin)	559	812354	0.07%	407	139471	0.29%
05010103	05010300	Broad-Spectrum Penicillins	Tetracyclines	557	812354	0.07%	222	139471	0.16%
01060200	04070100	Stimulant Laxatives	Non-Opioid And Compound Analgesics	552	812354	0.07%	297	139471	0.21%
01030100	05010103	H2-Receptor Antagonists	Broad-Spectrum Penicillins	552	812354	0.07%	264	139471	0.19%
05010102	13100101	Penicillinase-Resistant Penicillins	Antibacterial Preparations Only Used Topically	552	812354	0.07%	160	139471	0.11%
04010100	04065500	Hypnotics	Products Used Against Nausea And Vertigo - Domperidone & Metoclopramide	551	812354	0.07%	223	139471	0.16%
04065500	04065600	Products Used Against Nausea And Vertigo - Domperidone & Metoclopramide	Products Used Against Nausea And Vertigo - 5 HT3 Antagonists	548	812354	0.07%	166	139471	0.12%
04010201	04030400	Benzodiazepines	Other Antidepressants	546	812354	0.07%	487	139471	0.35%
04060000	10010100	Products Used Against Nausea And Vertigo	Non-Steroidal Anti-Inflammatory Drugs	546	812354	0.07%	233	139471	0.17%
03020000	13020102	Corticosteroids (For Respiratory Conditions)	Emollient Skin Preparations	546	812354	0.07%	374	139471	0.27%
03020000	05010201	Corticosteroids (For Respiratory Conditions)	Cephalosporins	545	812354	0.07%	294	139471	0.21%
04070100	09060400	Non-Opioid And Compound Analgesics	Vitamin D	544	812354	0.07%	277	139471	0.20%
03010101	04030400	Selective Beta 2 Agonists	Other Antidepressants	543	812354	0.07%	503	139471	0.36%
01010201	05011300	Compound Alginate Preparations	Urinary-Tract Infections	543	812354	0.07%	216	139471	0.15%
04070100	11040200	Non-Opioid And Compound Analgesics	Other Anti-Inflammatory Eye Preparations (For The Eye)	542	812354	0.07%	268	139471	0.19%
03010101	04010201	Selective Beta 2 Agonists	Benzodiazepines	541	812354	0.07%	463	139471	0.33%
04030100	07020250	Tricyclic And Related Antidepressants	Preparations For Vaginal And Vulval Candidiasis	539	812354	0.07%	359	139471	0.26%
03020000	05010500	Corticosteroids (For Respiratory Conditions)	Macrolides	538	812354	0.07%	321	139471	0.23%
09010101	13020102	Oral Iron	Emollient Skin Preparations	538	812354	0.07%	200	139471	0.14%
04060000	06020100	Products Used Against Nausea And Vertigo	Thyroid Hormones	537	812354	0.07%	358	139471	0.26%
01060400	04065600	Osmotic Laxatives	Products Used Against Nausea And Vertigo - 5 HT3 Antagonists	536	812354	0.07%	199	139471	0.14%
02090000	09010101	Antiplatelet Products	Oral Iron	534	812354	0.07%	225	139471	0.16%
05010201	12020101	Cephalosporins	Corticosteroids Used In Nasal Allergy	532	812354	0.07%	278	139471	0.20%
05010103	13100101	Broad-Spectrum Penicillins	Antibacterial Preparations Only Used Topically	532	812354	0.07%	206	139471	0.15%
04010201	10010100	Benzodiazepines	Non-Steroidal Anti-Inflammatory Drugs	531	812354	0.07%	291	139471	0.21%
01020200	04030300	Other Antispasmodics	Selective Serotonin Re-Uptake Inhibitors (SSRI)	530	812354	0.07%	405	139471	0.29%
01040200	04030300	Antimotility Products	Selective Serotonin Re-Uptake Inhibitors (SSRI)	529	812354	0.07%	418	139471	0.30%
03010101	05010800	Selective Beta 2 Agonists	Sulphonamides And Trimethoprim	528	812354	0.06%	319	139471	0.23%
02090000	06020100	Antiplatelet Products	Thyroid Hormones	528	812354	0.06%	377	139471	0.27%
05011300	13040000	Urinary-Tract Infections	Topical Corticosteroids	527	812354	0.06%	217	139471	0.16%
01060400	03020000	Osmotic Laxatives	Corticosteroids (For Respiratory Conditions)	526	812354	0.06%	345	139471	0.25%
03040101	04060000	Non-Sedating Antihistamines	Products Used Against Nausea And Vertigo	525	812354	0.06%	313	139471	0.22%
01020200	05010103	Other Antispasmodics	Broad-Spectrum Penicillins	523	812354	0.06%	260	139471	0.19%
04065500	09010101	Products Used Against Nausea And Vertigo - Domperidone & Metoclopramide	Oral Iron	523	812354	0.06%	164	139471	0.12%
01020200	01060400	Other Antispasmodics	Osmotic Laxatives	522	812354	0.06%	263	139471	0.19%
01030500	06020100	Proton Pump Inhibitors	Thyroid Hormones	522	812354	0.06%	411	139471	0.29%
04060000	06040103	Products Used Against Nausea And Vertigo	Progestogen Products Doubling (In House Use)	522	812354	0.06%	186	139471	0.13%
03020000	09010101	Corticosteroids (For Respiratory Conditions)	Oral Iron	522	812354	0.06%	294	139471	0.21%
01060400	04070200	Osmotic Laxatives	Opioid Analgesics	519	812354	0.06%	356	139471	0.26%
01030500	06040103	Proton Pump Inhibitors	Progestogen Products Doubling (In House Use)	519	812354	0.06%	232	139471	0.17%
03040102	04060000	Sedating Antihistamines	Products Used Against Nausea And Vertigo	518	812354	0.06%	204	139471	0.15%
05010103	09060400	Broad-Spectrum Penicillins	Vitamin D	518	812354	0.06%	217	139471	0.16%
01010201	03040102	Compound Alginate Preparations	Sedating Antihistamines	517	812354	0.06%	212	139471	0.15%
01060400	04105100	Osmotic Laxatives	Substance Dependence - Nicotine Dependence	516	812354	0.06%	220	139471	0.16%
04010100	04070200	Hypnotics	Opioid Analgesics	515	812354	0.06%	410	139471	0.29%
06010101	06010202	Short-Acting Insulins	Biguanides (Metformin)	509	812354	0.06%	379	139471	0.27%
04060000	04070200	Products Used Against Nausea And Vertigo	Opioid Analgesics	507	812354	0.06%	365	139471	0.26%
02040000	02090000	Beta-Adrenoceptor Blockers	Antiplatelet Products	505	812354	0.06%	316	139471	0.23%
01060400	04010100	Osmotic Laxatives	Hypnotics	504	812354	0.06%	298	139471	0.21%
01060400	02090000	Osmotic Laxatives	Antiplatelet Products	501	812354	0.06%	228	139471	0.16%
01010201	04030100	Compound Alginate Preparations	Tricyclic And Related Antidepressants	501	812354	0.06%	343	139471	0.25%
01030100	04030300	H2-Receptor Antagonists	Selective Serotonin Re-Uptake Inhibitors (SSRI)	501	812354	0.06%	383	139471	0.27%
01010201	05010101	Compound Alginate Preparations	Benzylpenicillin And Phenoxymethylpenicillin	501	812354	0.06%	177	139471	0.13%
04020101	05011300	First-Generation Antipsychotic Drugs	Urinary-Tract Infections	499	812354	0.06%	196	139471	0.14%
01030500	02090000	Proton Pump Inhibitors	Antiplatelet Products	498	812354	0.06%	344	139471	0.25%
13020102	13020103	Emollient Skin Preparations	Antimicrobial Emollients	496	812354	0.06%	235	139471	0.17%
03020000	04060000	Corticosteroids (For Respiratory Conditions)	Products Used Against Nausea And Vertigo	495	812354	0.06%	318	139471	0.23%
02080100	06040102	Parenteral Anticoagulants	Progestogens And Progesterone Receptor Modulators	495	812354	0.06%	180	139471	0.13%
04070100	05010300	Non-Opioid And Compound Analgesics	Tetracyclines	494	812354	0.06%	234	139471	0.17%
03020000	06040103	Corticosteroids (For Respiratory Conditions)	Progestogen Products Doubling (In House Use)	493	812354	0.06%	235	139471	0.17%
04070100	12030100	Non-Opioid And Compound Analgesics	Drugs For Oral Ulceration And Inflammation	493	812354	0.06%	179	139471	0.13%
05010101	06040103	Benzylpenicillin And Phenoxymethylpenicillin	Progestogen Products Doubling (In House Use)	492	812354	0.06%	110	139471	0.08%
04070100	11030100	Non-Opioid And Compound Analgesics	Antibacterials (In Eye Preparation)	491	812354	0.06%	186	139471	0.13%
01010201	13020100	Compound Alginate Preparations	Emollients	489	812354	0.06%	219	139471	0.16%
02090000	13040000	Antiplatelet Products	Topical Corticosteroids	488	812354	0.06%	247	139471	0.18%
05010500	06040103	Macrolides	Progestogen Products Doubling (In House Use)	487	812354	0.06%	135	139471	0.10%
04070200	07020250	Opioid Analgesics	Preparations For Vaginal And Vulval Candidiasis	487	812354	0.06%	328	139471	0.24%
03040101	06020100	Non-Sedating Antihistamines	Thyroid Hormones	486	812354	0.06%	383	139471	0.27%
13040000	13100101	Topical Corticosteroids	Antibacterial Preparations Only Used Topically	486	812354	0.06%	205	139471	0.15%
01010201	04105100	Compound Alginate Preparations	Substance Dependence - Nicotine Dependence	484	812354	0.06%	215	139471	0.15%
05010103	06040102	Broad-Spectrum Penicillins	Progestogens And Progesterone Receptor Modulators	484	812354	0.06%	206	139471	0.15%
03040101	10010100	Non-Sedating Antihistamines	Non-Steroidal Anti-Inflammatory Drugs	481	812354	0.06%	267	139471	0.19%
03040101	13020101	Non-Sedating Antihistamines	Emollient Bath Additives And Shower Preparations	479	812354	0.06%	297	139471	0.21%
01030100	04020101	H2-Receptor Antagonists	First-Generation Antipsychotic Drugs	478	812354	0.06%	169	139471	0.12%
01060400	04030100	Osmotic Laxatives	Tricyclic And Related Antidepressants	478	812354	0.06%	333	139471	0.24%
04105100	13040000	Substance Dependence - Nicotine Dependence	Topical Corticosteroids	478	812354	0.06%	208	139471	0.15%
01030500	04010100	Proton Pump Inhibitors	Hypnotics	476	812354	0.06%	350	139471	0.25%
01030500	05010500	Proton Pump Inhibitors	Macrolides	476	812354	0.06%	231	139471	0.17%
07020250	13040200	Preparations For Vaginal And Vulval Candidiasis	Mild Topical Corticosteroids	476	812354	0.06%	161	139471	0.12%
01050200	03040101	Corticosteroids In Chronic Bowel Problems	Non-Sedating Antihistamines	474	812354	0.06%	304	139471	0.22%
01010201	04070200	Compound Alginate Preparations	Opioid Analgesics	474	812354	0.06%	328	139471	0.24%
01050200	05010500	Corticosteroids In Chronic Bowel Problems	Macrolides	473	812354	0.06%	274	139471	0.20%
04060000	13020102	Products Used Against Nausea And Vertigo	Emollient Skin Preparations	473	812354	0.06%	218	139471	0.16%
01070200	07020250	Compound Haemorrhoid Products With Corticosteroids	Preparations For Vaginal And Vulval Candidiasis	472	812354	0.06%	165	139471	0.12%
04060000	05010800	Products Used Against Nausea And Vertigo	Sulphonamides And Trimethoprim	471	812354	0.06%	159	139471	0.11%
12020101	13020102	Corticosteroids Used In Nasal Allergy	Emollient Skin Preparations	471	812354	0.06%	294	139471	0.21%
05011300	09010101	Urinary-Tract Infections	Oral Iron	469	812354	0.06%	142	139471	0.10%
04030400	04060000	Other Antidepressants	Products Used Against Nausea And Vertigo	467	812354	0.06%	380	139471	0.27%
07020250	11040200	Preparations For Vaginal And Vulval Candidiasis	Other Anti-Inflammatory Eye Preparations (For The Eye)	467	812354	0.06%	204	139471	0.15%
05010102	06040103	Penicillinase-Resistant Penicillins	Progestogen Products Doubling (In House Use)	465	812354	0.06%	113	139471	0.08%
01020200	01030500	Other Antispasmodics	Proton Pump Inhibitors	463	812354	0.06%	288	139471	0.21%
06020100	12020101	Thyroid Hormones	Corticosteroids Used In Nasal Allergy	461	812354	0.06%	382	139471	0.27%
04020102	04030400	Second-Generation Antipsychotic Drugs	Other Antidepressants	459	812354	0.06%	436	139471	0.31%
01030500	02040000	Proton Pump Inhibitors	Beta-Adrenoceptor Blockers	457	812354	0.06%	360	139471	0.26%
05010102	13020102	Penicillinase-Resistant Penicillins	Emollient Skin Preparations	457	812354	0.06%	205	139471	0.15%
04010100	13040000	Hypnotics	Topical Corticosteroids	456	812354	0.06%	289	139471	0.21%
04070100	13100101	Non-Opioid And Compound Analgesics	Antibacterial Preparations Only Used Topically	456	812354	0.06%	195	139471	0.14%
01030100	04065500	H2-Receptor Antagonists	Products Used Against Nausea And Vertigo - Domperidone & Metoclopramide	454	812354	0.06%	192	139471	0.14%
05010101	10010100	Benzylpenicillin And Phenoxymethylpenicillin	Non-Steroidal Anti-Inflammatory Drugs	453	812354	0.06%	143	139471	0.10%
05010500	12020101	Macrolides	Corticosteroids Used In Nasal Allergy	450	812354	0.06%	241	139471	0.17%
01060400	05010500	Osmotic Laxatives	Macrolides	448	812354	0.06%	205	139471	0.15%
07020250	13100101	Preparations For Vaginal And Vulval Candidiasis	Antibacterial Preparations Only Used Topically	448	812354	0.06%	152	139471	0.11%
01030500	04030400	Proton Pump Inhibitors	Other Antidepressants	445	812354	0.05%	402	139471	0.29%
03040101	13020100	Non-Sedating Antihistamines	Emollients	443	812354	0.05%	225	139471	0.16%
01010201	11040200	Compound Alginate Preparations	Other Anti-Inflammatory Eye Preparations (For The Eye)	439	812354	0.05%	208	139471	0.15%
07020250	11030100	Preparations For Vaginal And Vulval Candidiasis	Antibacterials (In Eye Preparation)	437	812354	0.05%	140	139471	0.10%
01070200	05010103	Compound Haemorrhoid Products With Corticosteroids	Broad-Spectrum Penicillins	436	812354	0.05%	159	139471	0.11%
04105100	06040103	Substance Dependence - Nicotine Dependence	Progestogen Products Doubling (In House Use)	436	812354	0.05%	116	139471	0.08%
01060400	01070000	Osmotic Laxatives	Local Products For Anal Or Rectal Problems	435	812354	0.05%	127	139471	0.09%
04060000	09020100	Products Used Against Nausea And Vertigo	Oral Preparations For Fluid And Electrolyte Imbalance	435	812354	0.05%	115	139471	0.08%
01010201	05010800	Compound Alginate Preparations	Sulphonamides And Trimethoprim	434	812354	0.05%	170	139471	0.12%
05010103	05020100	Broad-Spectrum Penicillins	Triazole Antifungals	434	812354	0.05%	171	139471	0.12%
04065500	13040000	Products Used Against Nausea And Vertigo - Domperidone & Metoclopramide	Topical Corticosteroids	434	812354	0.05%	191	139471	0.14%
05010800	13040000	Sulphonamides And Trimethoprim	Topical Corticosteroids	434	812354	0.05%	172	139471	0.12%
04010100	04030100	Hypnotics	Tricyclic And Related Antidepressants	433	812354	0.05%	336	139471	0.24%
01050200	13040000	Corticosteroids In Chronic Bowel Problems	Topical Corticosteroids	432	812354	0.05%	287	139471	0.21%
01010201	05010102	Compound Alginate Preparations	Penicillinase-Resistant Penicillins	431	812354	0.05%	179	139471	0.13%
04020101	10010100	First-Generation Antipsychotic Drugs	Non-Steroidal Anti-Inflammatory Drugs	427	812354	0.05%	184	139471	0.13%
02040000	04060000	Beta-Adrenoceptor Blockers	Products Used Against Nausea And Vertigo	426	812354	0.05%	271	139471	0.19%
04030400	04070200	Other Antidepressants	Opioid Analgesics	426	812354	0.05%	382	139471	0.27%
01060400	05010800	Osmotic Laxatives	Sulphonamides And Trimethoprim	425	812354	0.05%	168	139471	0.12%
03040102	11040200	Sedating Antihistamines	Other Anti-Inflammatory Eye Preparations (For The Eye)	425	812354	0.05%	153	139471	0.11%
03040101	05010201	Non-Sedating Antihistamines	Cephalosporins	424	812354	0.05%	216	139471	0.15%
01050200	04030300	Corticosteroids In Chronic Bowel Problems	Selective Serotonin Re-Uptake Inhibitors (SSRI)	423	812354	0.05%	368	139471	0.26%
04030400	07020250	Other Antidepressants	Preparations For Vaginal And Vulval Candidiasis	423	812354	0.05%	347	139471	0.25%
05010102	10010100	Penicillinase-Resistant Penicillins	Non-Steroidal Anti-Inflammatory Drugs	423	812354	0.05%	155	139471	0.11%
01060200	05010103	Stimulant Laxatives	Broad-Spectrum Penicillins	422	812354	0.05%	199	139471	0.14%
04020101	06040103	First-Generation Antipsychotic Drugs	Progestogen Products Doubling (In House Use)	422	812354	0.05%	143	139471	0.10%
03020000	11040200	Corticosteroids (For Respiratory Conditions)	Other Anti-Inflammatory Eye Preparations (For The Eye)	422	812354	0.05%	262	139471	0.19%
01030100	01060400	H2-Receptor Antagonists	Osmotic Laxatives	420	812354	0.05%	197	139471	0.14%
01030500	03020000	Proton Pump Inhibitors	Corticosteroids (For Respiratory Conditions)	420	812354	0.05%	319	139471	0.23%
01030500	05011300	Proton Pump Inhibitors	Urinary-Tract Infections	418	812354	0.05%	234	139471	0.17%
04060000	09060400	Products Used Against Nausea And Vertigo	Vitamin D	418	812354	0.05%	159	139471	0.11%
05010500	09010101	Macrolides	Oral Iron	417	812354	0.05%	138	139471	0.10%
04105100	05010201	Substance Dependence - Nicotine Dependence	Cephalosporins	416	812354	0.05%	132	139471	0.09%
05010102	09010101	Penicillinase-Resistant Penicillins	Oral Iron	416	812354	0.05%	139	139471	0.10%
01030500	04010201	Proton Pump Inhibitors	Benzodiazepines	414	812354	0.05%	343	139471	0.25%
04030300	05011100	Selective Serotonin Re-Uptake Inhibitors (SSRI)	Metronidazole And Tinidazole	414	812354	0.05%	267	139471	0.19%
01020200	07020250	Other Antispasmodics	Preparations For Vaginal And Vulval Candidiasis	413	812354	0.05%	201	139471	0.14%
05010201	13020102	Cephalosporins	Emollient Skin Preparations	413	812354	0.05%	189	139471	0.14%
05010201	05011100	Cephalosporins	Metronidazole And Tinidazole	412	812354	0.05%	126	139471	0.09%
11030100	13040000	Antibacterials (In Eye Preparation)	Topical Corticosteroids	412	812354	0.05%	158	139471	0.11%
01010201	01060200	Compound Alginate Preparations	Stimulant Laxatives	411	812354	0.05%	182	139471	0.13%
04010100	05010201	Hypnotics	Cephalosporins	411	812354	0.05%	194	139471	0.14%
05010101	12030100	Benzylpenicillin And Phenoxymethylpenicillin	Drugs For Oral Ulceration And Inflammation	411	812354	0.05%	113	139471	0.08%
05010103	12030100	Broad-Spectrum Penicillins	Drugs For Oral Ulceration And Inflammation	411	812354	0.05%	148	139471	0.11%
01010201	02040000	Compound Alginate Preparations	Beta-Adrenoceptor Blockers	410	812354	0.05%	277	139471	0.20%
01020200	03010101	Other Antispasmodics	Selective Beta 2 Agonists	410	812354	0.05%	307	139471	0.22%
05010103	13020101	Broad-Spectrum Penicillins	Emollient Bath Additives And Shower Preparations	410	812354	0.05%	232	139471	0.17%
01010201	01020200	Compound Alginate Preparations	Other Antispasmodics	409	812354	0.05%	225	139471	0.16%
04030300	05010300	Selective Serotonin Re-Uptake Inhibitors (SSRI)	Tetracyclines	409	812354	0.05%	298	139471	0.21%
09010101	09050101	Oral Iron	Calcium Supplements	409	812354	0.05%	131	139471	0.09%
04070100	09060700	Non-Opioid And Compound Analgesics	Multivitamin And Multimineral Preparations	409	812354	0.05%	185	139471	0.13%
04060000	05010500	Products Used Against Nausea And Vertigo	Macrolides	408	812354	0.05%	171	139471	0.12%
04010100	10010100	Hypnotics	Non-Steroidal Anti-Inflammatory Drugs	408	812354	0.05%	260	139471	0.19%
04070100	12010151	Non-Opioid And Compound Analgesics	Anti-Inflammatory Preparations	407	812354	0.05%	164	139471	0.12%
06040103	12020101	Progestogen Products Doubling (In House Use)	Corticosteroids Used In Nasal Allergy	407	812354	0.05%	183	139471	0.13%
01040200	03010101	Antimotility Products	Selective Beta 2 Agonists	406	812354	0.05%	306	139471	0.22%
04030100	04060000	Tricyclic And Related Antidepressants	Products Used Against Nausea And Vertigo	406	812354	0.05%	299	139471	0.21%
05010103	09060700	Broad-Spectrum Penicillins	Multivitamin And Multimineral Preparations	405	812354	0.05%	160	139471	0.11%
05010500	10010100	Macrolides	Non-Steroidal Anti-Inflammatory Drugs	405	812354	0.05%	175	139471	0.13%
05010201	06020100	Cephalosporins	Thyroid Hormones	403	812354	0.05%	261	139471	0.19%
05010101	09010101	Benzylpenicillin And Phenoxymethylpenicillin	Oral Iron	402	812354	0.05%	90	139471	0.06%
01060100	04030300	Bulk-Forming Laxatives	Selective Serotonin Re-Uptake Inhibitors (SSRI)	401	812354	0.05%	292	139471	0.21%
03010101	05010300	Selective Beta 2 Agonists	Tetracyclines	401	812354	0.05%	247	139471	0.18%
01060400	05010101	Osmotic Laxatives	Benzylpenicillin And Phenoxymethylpenicillin	399	812354	0.05%	142	139471	0.10%
05010101	05010201	Benzylpenicillin And Phenoxymethylpenicillin	Cephalosporins	399	812354	0.05%	125	139471	0.09%
04010201	07020250	Benzodiazepines	Preparations For Vaginal And Vulval Candidiasis	399	812354	0.05%	294	139471	0.21%
01060100	01060200	Bulk-Forming Laxatives	Stimulant Laxatives	398	812354	0.05%	165	139471	0.12%
01030100	03010101	H2-Receptor Antagonists	Selective Beta 2 Agonists	398	812354	0.05%	290	139471	0.21%
04020100	04020101	Antipsychotic Products	First-Generation Antipsychotic Drugs	398	812354	0.05%	115	139471	0.08%
05010800	10010100	Sulphonamides And Trimethoprim	Non-Steroidal Anti-Inflammatory Drugs	396	812354	0.05%	156	139471	0.11%
01030100	04065400	H2-Receptor Antagonists	Products Used Against Nausea And Vertigo - Antihistamines	394	812354	0.05%	146	139471	0.10%
01010201	09060400	Compound Alginate Preparations	Vitamin D	394	812354	0.05%	148	139471	0.11%
13040000	13050200	Topical Corticosteroids	Preparations For Psoriasis	394	812354	0.05%	201	139471	0.14%
01070200	04070100	Compound Haemorrhoid Products With Corticosteroids	Non-Opioid And Compound Analgesics	393	812354	0.05%	178	139471	0.13%
02040000	04030400	Beta-Adrenoceptor Blockers	Other Antidepressants	392	812354	0.05%	341	139471	0.24%
01040200	07020250	Antimotility Products	Preparations For Vaginal And Vulval Candidiasis	392	812354	0.05%	206	139471	0.15%
01060400	03040102	Osmotic Laxatives	Sedating Antihistamines	390	812354	0.05%	169	139471	0.12%
04010201	04030100	Benzodiazepines	Tricyclic And Related Antidepressants	390	812354	0.05%	313	139471	0.22%
03040101	05010102	Non-Sedating Antihistamines	Penicillinase-Resistant Penicillins	389	812354	0.05%	170	139471	0.12%
05011300	06040103	Urinary-Tract Infections	Progestogen Products Doubling (In House Use)	389	812354	0.05%	123	139471	0.09%
02040000	07020250	Beta-Adrenoceptor Blockers	Preparations For Vaginal And Vulval Candidiasis	388	812354	0.05%	250	139471	0.18%
04030300	13020100	Selective Serotonin Re-Uptake Inhibitors (SSRI)	Emollients	388	812354	0.05%	300	139471	0.22%
01030500	01050200	Proton Pump Inhibitors	Corticosteroids In Chronic Bowel Problems	385	812354	0.05%	287	139471	0.21%
04065400	06040103	Products Used Against Nausea And Vertigo - Antihistamines	Progestogen Products Doubling (In House Use)	385	812354	0.05%	139	139471	0.10%
13040000	13090100	Topical Corticosteroids	Shampoos And Other Scalp Preparations	385	812354	0.05%	195	139471	0.14%
05010800	09010101	Sulphonamides And Trimethoprim	Oral Iron	383	812354	0.05%	137	139471	0.10%
04020100	05010103	Antipsychotic Products	Broad-Spectrum Penicillins	382	812354	0.05%	112	139471	0.08%
01050200	07020250	Corticosteroids In Chronic Bowel Problems	Preparations For Vaginal And Vulval Candidiasis	380	812354	0.05%	245	139471	0.18%
09010101	09010200	Oral Iron	Drugs Used In Megaloblastic Anaemias	380	812354	0.05%	170	139471	0.12%
03010101	11030100	Selective Beta 2 Agonists	Antibacterials (In Eye Preparation)	379	812354	0.05%	205	139471	0.15%
04065500	05011300	Products Used Against Nausea And Vertigo - Domperidone & Metoclopramide	Urinary-Tract Infections	378	812354	0.05%	153	139471	0.11%
04070200	13040000	Opioid Analgesics	Topical Corticosteroids	378	812354	0.05%	271	139471	0.19%
04030300	11040200	Selective Serotonin Re-Uptake Inhibitors (SSRI)	Other Anti-Inflammatory Eye Preparations (For The Eye)	376	812354	0.05%	306	139471	0.22%
10010100	12020101	Non-Steroidal Anti-Inflammatory Drugs	Corticosteroids Used In Nasal Allergy	376	812354	0.05%	204	139471	0.15%
04060000	05010102	Products Used Against Nausea And Vertigo	Penicillinase-Resistant Penicillins	375	812354	0.05%	155	139471	0.11%
02090000	09060400	Antiplatelet Products	Vitamin D	375	812354	0.05%	177	139471	0.13%
01010201	01070200	Compound Alginate Preparations	Compound Haemorrhoid Products With Corticosteroids	374	812354	0.05%	144	139471	0.10%
06020100	06040102	Thyroid Hormones	Progestogens And Progesterone Receptor Modulators	374	812354	0.05%	239	139471	0.17%
04065400	10010100	Products Used Against Nausea And Vertigo - Antihistamines	Non-Steroidal Anti-Inflammatory Drugs	374	812354	0.05%	177	139471	0.13%
05010103	06010202	Broad-Spectrum Penicillins	Biguanides (Metformin)	372	812354	0.05%	253	139471	0.18%
04030100	13040000	Tricyclic And Related Antidepressants	Topical Corticosteroids	372	812354	0.05%	278	139471	0.20%
04070100	04070300	Non-Opioid And Compound Analgesics	Neuropathic Pain	369	812354	0.05%	267	139471	0.19%
01060400	05010102	Osmotic Laxatives	Penicillinase-Resistant Penicillins	369	812354	0.05%	138	139471	0.10%
04065400	12020101	Products Used Against Nausea And Vertigo - Antihistamines	Corticosteroids Used In Nasal Allergy	369	812354	0.05%	184	139471	0.13%
04070100	06010202	Non-Opioid And Compound Analgesics	Biguanides (Metformin)	368	812354	0.05%	279	139471	0.20%
01030100	07020250	H2-Receptor Antagonists	Preparations For Vaginal And Vulval Candidiasis	368	812354	0.05%	184	139471	0.13%
13020101	13020103	Emollient Bath Additives And Shower Preparations	Antimicrobial Emollients	368	812354	0.05%	181	139471	0.13%
01060100	03010101	Bulk-Forming Laxatives	Selective Beta 2 Agonists	367	812354	0.05%	238	139471	0.17%
04030300	04070401	Selective Serotonin Re-Uptake Inhibitors (SSRI)	Acute Migraine	366	812354	0.05%	318	139471	0.23%
07020250	13020101	Preparations For Vaginal And Vulval Candidiasis	Emollient Bath Additives And Shower Preparations	366	812354	0.05%	191	139471	0.14%
01010201	04030400	Compound Alginate Preparations	Other Antidepressants	365	812354	0.04%	312	139471	0.22%
03010101	09060400	Selective Beta 2 Agonists	Vitamin D	365	812354	0.04%	267	139471	0.19%
06040103	13020102	Progestogen Products Doubling (In House Use)	Emollient Skin Preparations	365	812354	0.04%	153	139471	0.11%
06020100	13020102	Thyroid Hormones	Emollient Skin Preparations	365	812354	0.04%	245	139471	0.18%
04020100	04070100	Antipsychotic Products	Non-Opioid And Compound Analgesics	364	812354	0.04%	146	139471	0.10%
06010101	06020100	Short-Acting Insulins	Thyroid Hormones	363	812354	0.04%	345	139471	0.25%
04020101	12020101	First-Generation Antipsychotic Drugs	Corticosteroids Used In Nasal Allergy	363	812354	0.04%	201	139471	0.14%
04070100	13020101	Non-Opioid And Compound Analgesics	Emollient Bath Additives And Shower Preparations	363	812354	0.04%	210	139471	0.15%
05010103	13060102	Broad-Spectrum Penicillins	Topical Antibacterials For Acne	363	812354	0.04%	119	139471	0.09%
04010201	04060000	Benzodiazepines	Products Used Against Nausea And Vertigo	362	812354	0.04%	255	139471	0.18%
05010500	05011100	Macrolides	Metronidazole And Tinidazole	362	812354	0.04%	122	139471	0.09%
01050200	06040102	Corticosteroids In Chronic Bowel Problems	Progestogens And Progesterone Receptor Modulators	361	812354	0.04%	149	139471	0.11%
01050200	12020101	Corticosteroids In Chronic Bowel Problems	Corticosteroids Used In Nasal Allergy	361	812354	0.04%	269	139471	0.19%
03020000	06020100	Corticosteroids (For Respiratory Conditions)	Thyroid Hormones	360	812354	0.04%	329	139471	0.24%
01060100	09010101	Bulk-Forming Laxatives	Oral Iron	360	812354	0.04%	114	139471	0.08%
06020100	09060400	Thyroid Hormones	Vitamin D	360	812354	0.04%	232	139471	0.17%
02090000	04020101	Antiplatelet Products	First-Generation Antipsychotic Drugs	358	812354	0.04%	131	139471	0.09%
09010101	13020100	Oral Iron	Emollients	358	812354	0.04%	136	139471	0.10%
01010201	04010201	Compound Alginate Preparations	Benzodiazepines	357	812354	0.04%	267	139471	0.19%
04020101	04030400	First-Generation Antipsychotic Drugs	Other Antidepressants	356	812354	0.04%	306	139471	0.22%
05011100	06040103	Metronidazole And Tinidazole	Progestogen Products Doubling (In House Use)	355	812354	0.04%	89	139471	0.06%
01050100	01050200	Aminosalicylates	Corticosteroids In Chronic Bowel Problems	353	812354	0.04%	192	139471	0.14%
04070401	05010103	Acute Migraine	Broad-Spectrum Penicillins	353	812354	0.04%	204	139471	0.15%
01030500	05010800	Proton Pump Inhibitors	Sulphonamides And Trimethoprim	353	812354	0.04%	181	139471	0.13%
05010300	07020250	Tetracyclines	Preparations For Vaginal And Vulval Candidiasis	353	812354	0.04%	134	139471	0.10%
04010100	09010101	Hypnotics	Oral Iron	352	812354	0.04%	179	139471	0.13%
04030300	09060400	Selective Serotonin Re-Uptake Inhibitors (SSRI)	Vitamin D	352	812354	0.04%	265	139471	0.19%
01010201	04020100	Compound Alginate Preparations	Antipsychotic Products	350	812354	0.04%	112	139471	0.08%
05010300	05011100	Tetracyclines	Metronidazole And Tinidazole	350	812354	0.04%	92	139471	0.07%
04060000	05010101	Products Used Against Nausea And Vertigo	Benzylpenicillin And Phenoxymethylpenicillin	348	812354	0.04%	116	139471	0.08%
02090000	06010101	Antiplatelet Products	Short-Acting Insulins	346	812354	0.04%	287	139471	0.21%
05010102	05010201	Penicillinase-Resistant Penicillins	Cephalosporins	345	812354	0.04%	110	139471	0.08%
07020250	13060102	Preparations For Vaginal And Vulval Candidiasis	Topical Antibacterials For Acne	345	812354	0.04%	112	139471	0.08%
01060200	04030300	Stimulant Laxatives	Selective Serotonin Re-Uptake Inhibitors (SSRI)	344	812354	0.04%	276	139471	0.20%
03040102	04065400	Sedating Antihistamines	Products Used Against Nausea And Vertigo - Antihistamines	344	812354	0.04%	115	139471	0.08%
07020250	09060400	Preparations For Vaginal And Vulval Candidiasis	Vitamin D	344	812354	0.04%	165	139471	0.12%
04065500	10010100	Products Used Against Nausea And Vertigo - Domperidone & Metoclopramide	Non-Steroidal Anti-Inflammatory Drugs	344	812354	0.04%	150	139471	0.11%
01060100	13040000	Bulk-Forming Laxatives	Topical Corticosteroids	344	812354	0.04%	158	139471	0.11%
03040101	04020101	Non-Sedating Antihistamines	First-Generation Antipsychotic Drugs	343	812354	0.04%	199	139471	0.14%
01060200	07020250	Stimulant Laxatives	Preparations For Vaginal And Vulval Candidiasis	343	812354	0.04%	161	139471	0.12%
03020000	10010100	Corticosteroids (For Respiratory Conditions)	Non-Steroidal Anti-Inflammatory Drugs	343	812354	0.04%	208	139471	0.15%
01060400	04030400	Osmotic Laxatives	Other Antidepressants	342	812354	0.04%	297	139471	0.21%
04065400	09020100	Products Used Against Nausea And Vertigo - Antihistamines	Oral Preparations For Fluid And Electrolyte Imbalance	342	812354	0.04%	99	139471	0.07%
04030300	13100101	Selective Serotonin Re-Uptake Inhibitors (SSRI)	Antibacterial Preparations Only Used Topically	342	812354	0.04%	238	139471	0.17%
03040102	04020101	Sedating Antihistamines	First-Generation Antipsychotic Drugs	341	812354	0.04%	118	139471	0.08%
04030300	13020101	Selective Serotonin Re-Uptake Inhibitors (SSRI)	Emollient Bath Additives And Shower Preparations	341	812354	0.04%	268	139471	0.19%
04030100	04030400	Tricyclic And Related Antidepressants	Other Antidepressants	340	812354	0.04%	292	139471	0.21%
06010102	06020100	Intermediate- And Long-Acting Insulins	Thyroid Hormones	340	812354	0.04%	326	139471	0.23%
04060000	09060700	Products Used Against Nausea And Vertigo	Multivitamin And Multimineral Preparations	340	812354	0.04%	121	139471	0.09%
01030500	13020102	Proton Pump Inhibitors	Emollient Skin Preparations	340	812354	0.04%	215	139471	0.15%
02090000	05011300	Antiplatelet Products	Urinary-Tract Infections	338	812354	0.04%	146	139471	0.10%
06020100	10010100	Thyroid Hormones	Non-Steroidal Anti-Inflammatory Drugs	338	812354	0.04%	244	139471	0.17%
05010103	06010102	Broad-Spectrum Penicillins	Intermediate- And Long-Acting Insulins	337	812354	0.04%	275	139471	0.20%
06040102	07020250	Progestogens And Progesterone Receptor Modulators	Preparations For Vaginal And Vulval Candidiasis	337	812354	0.04%	119	139471	0.09%
03010000	04070100	Bronchodilators	Non-Opioid And Compound Analgesics	336	812354	0.04%	233	139471	0.17%
03090200	05010103	Demulcent And Expectorant Cough Preparations	Broad-Spectrum Penicillins	335	812354	0.04%	93	139471	0.07%
03010101	06040102	Selective Beta 2 Agonists	Progestogens And Progesterone Receptor Modulators	334	812354	0.04%	208	139471	0.15%
03020000	04065400	Corticosteroids (For Respiratory Conditions)	Products Used Against Nausea And Vertigo - Antihistamines	333	812354	0.04%	204	139471	0.15%
04030300	09060700	Selective Serotonin Re-Uptake Inhibitors (SSRI)	Multivitamin And Multimineral Preparations	333	812354	0.04%	249	139471	0.18%
04030300	11030100	Selective Serotonin Re-Uptake Inhibitors (SSRI)	Antibacterials (In Eye Preparation)	333	812354	0.04%	242	139471	0.17%
02090000	05010201	Antiplatelet Products	Cephalosporins	332	812354	0.04%	150	139471	0.11%
05010103	06010101	Broad-Spectrum Penicillins	Short-Acting Insulins	331	812354	0.04%	276	139471	0.20%
02090000	06010102	Antiplatelet Products	Intermediate- And Long-Acting Insulins	330	812354	0.04%	262	139471	0.19%
03040102	09010101	Sedating Antihistamines	Oral Iron	330	812354	0.04%	119	139471	0.09%
01030500	09060400	Proton Pump Inhibitors	Vitamin D	330	812354	0.04%	209	139471	0.15%
01040200	01060400	Antimotility Products	Osmotic Laxatives	329	812354	0.04%	151	139471	0.11%
04010100	04020102	Hypnotics	Second-Generation Antipsychotic Drugs	329	812354	0.04%	304	139471	0.22%
02090000	06010202	Antiplatelet Products	Biguanides (Metformin)	329	812354	0.04%	228	139471	0.16%
04030400	13040000	Other Antidepressants	Topical Corticosteroids	329	812354	0.04%	276	139471	0.20%
01060400	04010201	Osmotic Laxatives	Benzodiazepines	326	812354	0.04%	247	139471	0.18%
03040101	05010500	Non-Sedating Antihistamines	Macrolides	326	812354	0.04%	185	139471	0.13%
04065500	06040103	Products Used Against Nausea And Vertigo - Domperidone & Metoclopramide	Progestogen Products Doubling (In House Use)	326	812354	0.04%	106	139471	0.08%
04030100	06040103	Tricyclic And Related Antidepressants	Progestogen Products Doubling (In House Use)	326	812354	0.04%	201	139471	0.14%
01040200	10010100	Antimotility Products	Non-Steroidal Anti-Inflammatory Drugs	326	812354	0.04%	167	139471	0.12%
03010101	13100101	Selective Beta 2 Agonists	Antibacterial Preparations Only Used Topically	326	812354	0.04%	187	139471	0.13%
03030200	03040101	Leukotriene Receptor Antagonists	Non-Sedating Antihistamines	325	812354	0.04%	251	139471	0.18%
01040200	04060000	Antimotility Products	Products Used Against Nausea And Vertigo	324	812354	0.04%	162	139471	0.12%
04010100	06040103	Hypnotics	Progestogen Products Doubling (In House Use)	323	812354	0.04%	157	139471	0.11%
06010102	07020250	Intermediate- And Long-Acting Insulins	Preparations For Vaginal And Vulval Candidiasis	323	812354	0.04%	245	139471	0.18%
06010202	06020100	Biguanides (Metformin)	Thyroid Hormones	322	812354	0.04%	283	139471	0.20%
04030400	06040103	Other Antidepressants	Progestogen Products Doubling (In House Use)	322	812354	0.04%	234	139471	0.17%
04020101	04030100	First-Generation Antipsychotic Drugs	Tricyclic And Related Antidepressants	321	812354	0.04%	233	139471	0.17%
04020100	04060000	Antipsychotic Products	Products Used Against Nausea And Vertigo	321	812354	0.04%	76	139471	0.05%
03040101	04065400	Non-Sedating Antihistamines	Products Used Against Nausea And Vertigo - Antihistamines	321	812354	0.04%	170	139471	0.12%
09010101	09060700	Oral Iron	Multivitamin And Multimineral Preparations	321	812354	0.04%	98	139471	0.07%
01060200	04060000	Stimulant Laxatives	Products Used Against Nausea And Vertigo	320	812354	0.04%	164	139471	0.12%
04070100	13060102	Non-Opioid And Compound Analgesics	Topical Antibacterials For Acne	320	812354	0.04%	130	139471	0.09%
01070200	13040000	Compound Haemorrhoid Products With Corticosteroids	Topical Corticosteroids	319	812354	0.04%	132	139471	0.09%
04020101	05010500	First-Generation Antipsychotic Drugs	Macrolides	317	812354	0.04%	127	139471	0.09%
01030500	01040200	Proton Pump Inhibitors	Antimotility Products	316	812354	0.04%	211	139471	0.15%
06020100	06040103	Thyroid Hormones	Progestogen Products Doubling (In House Use)	316	812354	0.04%	190	139471	0.14%
04030300	13060102	Selective Serotonin Re-Uptake Inhibitors (SSRI)	Topical Antibacterials For Acne	316	812354	0.04%	207	139471	0.15%
03020000	03040102	Corticosteroids (For Respiratory Conditions)	Sedating Antihistamines	315	812354	0.04%	200	139471	0.14%
05010101	05010500	Benzylpenicillin And Phenoxymethylpenicillin	Macrolides	315	812354	0.04%	89	139471	0.06%
04070100	06040102	Non-Opioid And Compound Analgesics	Progestogens And Progesterone Receptor Modulators	315	812354	0.04%	166	139471	0.12%
04030400	10010100	Other Antidepressants	Non-Steroidal Anti-Inflammatory Drugs	315	812354	0.04%	266	139471	0.19%
03040102	04065500	Sedating Antihistamines	Products Used Against Nausea And Vertigo - Domperidone & Metoclopramide	314	812354	0.04%	106	139471	0.08%
04070100	05020100	Non-Opioid And Compound Analgesics	Triazole Antifungals	314	812354	0.04%	157	139471	0.11%
04020101	06020100	First-Generation Antipsychotic Drugs	Thyroid Hormones	314	812354	0.04%	207	139471	0.15%
13040000	13040200	Topical Corticosteroids	Mild Topical Corticosteroids	314	812354	0.04%	139	139471	0.10%
04030100	05010201	Tricyclic And Related Antidepressants	Cephalosporins	313	812354	0.04%	216	139471	0.15%
04070200	05010201	Opioid Analgesics	Cephalosporins	313	812354	0.04%	193	139471	0.14%
02040000	04030100	Beta-Adrenoceptor Blockers	Tricyclic And Related Antidepressants	312	812354	0.04%	248	139471	0.18%
03090200	04070100	Demulcent And Expectorant Cough Preparations	Non-Opioid And Compound Analgesics	312	812354	0.04%	88	139471	0.06%
04020101	05010800	First-Generation Antipsychotic Drugs	Sulphonamides And Trimethoprim	312	812354	0.04%	121	139471	0.09%
03040102	13020101	Sedating Antihistamines	Emollient Bath Additives And Shower Preparations	312	812354	0.04%	155	139471	0.11%
03020000	04020101	Corticosteroids (For Respiratory Conditions)	First-Generation Antipsychotic Drugs	310	812354	0.04%	185	139471	0.13%
05010101	05010102	Benzylpenicillin And Phenoxymethylpenicillin	Penicillinase-Resistant Penicillins	310	812354	0.04%	84	139471	0.06%
04065400	09020102	Products Used Against Nausea And Vertigo - Antihistamines	Oral Sodium And Water	309	812354	0.04%	84	139471	0.06%
03040102	13020100	Sedating Antihistamines	Emollients	309	812354	0.04%	137	139471	0.10%
05011100	13040000	Metronidazole And Tinidazole	Topical Corticosteroids	308	812354	0.04%	119	139471	0.09%
04065400	05010800	Products Used Against Nausea And Vertigo - Antihistamines	Sulphonamides And Trimethoprim	307	812354	0.04%	101	139471	0.07%
04070200	06040103	Opioid Analgesics	Progestogen Products Doubling (In House Use)	307	812354	0.04%	172	139471	0.12%
09060400	13040000	Vitamin D	Topical Corticosteroids	307	812354	0.04%	142	139471	0.10%
05020100	13040000	Triazole Antifungals	Topical Corticosteroids	306	812354	0.04%	133	139471	0.10%
03010000	13040000	Bronchodilators	Topical Corticosteroids	306	812354	0.04%	203	139471	0.15%
04070200	09010101	Opioid Analgesics	Oral Iron	305	812354	0.04%	187	139471	0.13%
01060400	13020100	Osmotic Laxatives	Emollients	305	812354	0.04%	152	139471	0.11%
01010201	01040200	Compound Alginate Preparations	Antimotility Products	304	812354	0.04%	164	139471	0.12%
06010101	07020250	Short-Acting Insulins	Preparations For Vaginal And Vulval Candidiasis	303	812354	0.04%	240	139471	0.17%
03020000	13020100	Corticosteroids (For Respiratory Conditions)	Emollients	303	812354	0.04%	203	139471	0.15%
02040000	04010100	Beta-Adrenoceptor Blockers	Hypnotics	302	812354	0.04%	215	139471	0.15%
01040200	04070200	Antimotility Products	Opioid Analgesics	302	812354	0.04%	201	139471	0.14%
05010102	05010500	Penicillinase-Resistant Penicillins	Macrolides	302	812354	0.04%	98	139471	0.07%
04030300	06010202	Selective Serotonin Re-Uptake Inhibitors (SSRI)	Biguanides (Metformin)	301	812354	0.04%	278	139471	0.20%
04070100	09010200	Non-Opioid And Compound Analgesics	Drugs Used In Megaloblastic Anaemias	301	812354	0.04%	178	139471	0.13%
13040000	13100200	Topical Corticosteroids	Antifungal Preparations (Topical	301	812354	0.04%	99	139471	0.07%
04010201	04020101	Benzodiazepines	First-Generation Antipsychotic Drugs	300	812354	0.04%	222	139471	0.16%
01020200	01060100	Other Antispasmodics	Bulk-Forming Laxatives	299	812354	0.04%	141	139471	0.10%
04105100	09010101	Substance Dependence - Nicotine Dependence	Oral Iron	299	812354	0.04%	83	139471	0.06%
05010103	12010100	Broad-Spectrum Penicillins	Drugs Acting On The Ear - Otitis Externa	299	812354	0.04%	84	139471	0.06%
13020102	71580200	Emollient Skin Preparations	Emollient Ointment	299	812354	0.04%	121	139471	0.09%
01060100	05010201	Bulk-Forming Laxatives	Cephalosporins	298	812354	0.04%	102	139471	0.07%
04060000	09060200	Products Used Against Nausea And Vertigo	Vitamin B Group	298	812354	0.04%	88	139471	0.06%
10010100	13020102	Non-Steroidal Anti-Inflammatory Drugs	Emollient Skin Preparations	297	812354	0.04%	152	139471	0.11%
04020000	04080100	Products Used In Psychoses And Related Disorders	Control Of Epilepsy	296	812354	0.04%	168	139471	0.12%
03020000	04105100	Corticosteroids (For Respiratory Conditions)	Substance Dependence - Nicotine Dependence	295	812354	0.04%	176	139471	0.13%
04070100	06010102	Non-Opioid And Compound Analgesics	Intermediate- And Long-Acting Insulins	295	812354	0.04%	235	139471	0.17%
03040102	05010201	Sedating Antihistamines	Cephalosporins	293	812354	0.04%	127	139471	0.09%
09010101	11040200	Oral Iron	Other Anti-Inflammatory Eye Preparations (For The Eye)	293	812354	0.04%	118	139471	0.08%
03010101	13020103	Selective Beta 2 Agonists	Antimicrobial Emollients	293	812354	0.04%	220	139471	0.16%
04020101	04070200	First-Generation Antipsychotic Drugs	Opioid Analgesics	292	812354	0.04%	197	139471	0.14%
03040101	04070200	Non-Sedating Antihistamines	Opioid Analgesics	292	812354	0.04%	232	139471	0.17%
01050200	05010201	Corticosteroids In Chronic Bowel Problems	Cephalosporins	292	812354	0.04%	173	139471	0.12%
01060400	05011100	Osmotic Laxatives	Metronidazole And Tinidazole	292	812354	0.04%	117	139471	0.08%
03090100	05010103	Cough Suppressants	Broad-Spectrum Penicillins	291	812354	0.04%	79	139471	0.06%
04065400	05010500	Products Used Against Nausea And Vertigo - Antihistamines	Macrolides	291	812354	0.04%	113	139471	0.08%
04105100	10010100	Substance Dependence - Nicotine Dependence	Non-Steroidal Anti-Inflammatory Drugs	291	812354	0.04%	110	139471	0.08%
11040200	13020102	Other Anti-Inflammatory Eye Preparations (For The Eye)	Emollient Skin Preparations	291	812354	0.04%	170	139471	0.12%
06010202	07020250	Biguanides (Metformin)	Preparations For Vaginal And Vulval Candidiasis	290	812354	0.04%	212	139471	0.15%
02040000	09010101	Beta-Adrenoceptor Blockers	Oral Iron	290	812354	0.04%	172	139471	0.12%
04030100	04070401	Tricyclic And Related Antidepressants	Acute Migraine	289	812354	0.04%	207	139471	0.15%
01060400	02040000	Osmotic Laxatives	Beta-Adrenoceptor Blockers	288	812354	0.04%	195	139471	0.14%
01010201	06040102	Compound Alginate Preparations	Progestogens And Progesterone Receptor Modulators	288	812354	0.04%	128	139471	0.09%
05010103	09010200	Broad-Spectrum Penicillins	Drugs Used In Megaloblastic Anaemias	288	812354	0.04%	154	139471	0.11%
03010101	05011100	Selective Beta 2 Agonists	Metronidazole And Tinidazole	287	812354	0.04%	167	139471	0.12%
01030100	09010101	H2-Receptor Antagonists	Oral Iron	287	812354	0.04%	109	139471	0.08%
06040102	13040000	Progestogens And Progesterone Receptor Modulators	Topical Corticosteroids	287	812354	0.04%	141	139471	0.10%
01010201	01050200	Compound Alginate Preparations	Corticosteroids In Chronic Bowel Problems	286	812354	0.04%	189	139471	0.14%
01060100	01070200	Bulk-Forming Laxatives	Compound Haemorrhoid Products With Corticosteroids	286	812354	0.04%	87	139471	0.06%
03040101	04030100	Non-Sedating Antihistamines	Tricyclic And Related Antidepressants	286	812354	0.04%	236	139471	0.17%
02090000	04065400	Antiplatelet Products	Products Used Against Nausea And Vertigo - Antihistamines	286	812354	0.04%	104	139471	0.07%
04070100	04080100	Non-Opioid And Compound Analgesics	Control Of Epilepsy	286	812354	0.04%	222	139471	0.16%
04060000	04105100	Products Used Against Nausea And Vertigo	Substance Dependence - Nicotine Dependence	286	812354	0.04%	113	139471	0.08%
04065600	05010103	Products Used Against Nausea And Vertigo - 5 HT3 Antagonists	Broad-Spectrum Penicillins	286	812354	0.04%	123	139471	0.09%
05010300	06040103	Tetracyclines	Progestogen Products Doubling (In House Use)	286	812354	0.04%	84	139471	0.06%
01010201	09020102	Compound Alginate Preparations	Oral Sodium And Water	286	812354	0.04%	84	139471	0.06%
04060000	09020102	Products Used Against Nausea And Vertigo	Oral Sodium And Water	285	812354	0.04%	69	139471	0.05%
04020101	09020102	First-Generation Antipsychotic Drugs	Oral Sodium And Water	285	812354	0.04%	68	139471	0.05%
01060400	09060400	Osmotic Laxatives	Vitamin D	285	812354	0.04%	131	139471	0.09%
13020102	13090000	Emollient Skin Preparations	Shampoos And Other Preparations For Scalp And Hair Conditions	285	812354	0.04%	137	139471	0.10%
01030500	03040102	Proton Pump Inhibitors	Sedating Antihistamines	284	812354	0.03%	179	139471	0.13%
03020000	04030100	Corticosteroids (For Respiratory Conditions)	Tricyclic And Related Antidepressants	284	812354	0.03%	244	139471	0.17%
04020100	04065500	Antipsychotic Products	Products Used Against Nausea And Vertigo - Domperidone & Metoclopramide	284	812354	0.03%	79	139471	0.06%
04010201	13040000	Benzodiazepines	Topical Corticosteroids	284	812354	0.03%	219	139471	0.16%
05010103	13100300	Broad-Spectrum Penicillins	Antiviral Preparations (Topical	284	812354	0.03%	105	139471	0.08%
02040000	04010201	Beta-Adrenoceptor Blockers	Benzodiazepines	282	812354	0.03%	219	139471	0.16%
01070200	04030300	Compound Haemorrhoid Products With Corticosteroids	Selective Serotonin Re-Uptake Inhibitors (SSRI)	282	812354	0.03%	212	139471	0.15%
01030500	01060200	Proton Pump Inhibitors	Stimulant Laxatives	280	812354	0.03%	184	139471	0.13%
04030100	04065400	Tricyclic And Related Antidepressants	Products Used Against Nausea And Vertigo - Antihistamines	279	812354	0.03%	184	139471	0.13%
01060400	06040102	Osmotic Laxatives	Progestogens And Progesterone Receptor Modulators	279	812354	0.03%	125	139471	0.09%
02040000	02060200	Beta-Adrenoceptor Blockers	Calcium-Channel Blockers	278	812354	0.03%	175	139471	0.13%
04065400	13020102	Products Used Against Nausea And Vertigo - Antihistamines	Emollient Skin Preparations	278	812354	0.03%	118	139471	0.08%
04020101	13020102	First-Generation Antipsychotic Drugs	Emollient Skin Preparations	278	812354	0.03%	128	139471	0.09%
03040101	04010100	Non-Sedating Antihistamines	Hypnotics	277	812354	0.03%	193	139471	0.14%
04030300	04065600	Selective Serotonin Re-Uptake Inhibitors (SSRI)	Products Used Against Nausea And Vertigo - 5 HT3 Antagonists	277	812354	0.03%	204	139471	0.15%
04065400	06020100	Products Used Against Nausea And Vertigo - Antihistamines	Thyroid Hormones	277	812354	0.03%	179	139471	0.13%
06010202	06040102	Biguanides (Metformin)	Progestogens And Progesterone Receptor Modulators	277	812354	0.03%	153	139471	0.11%
02040000	06040103	Beta-Adrenoceptor Blockers	Progestogen Products Doubling (In House Use)	277	812354	0.03%	154	139471	0.11%
01050100	01050300	Aminosalicylates	Products Affecting The Immune Response In Chronic Bowel Problems	276	812354	0.03%	156	139471	0.11%
04065500	04070200	Products Used Against Nausea And Vertigo - Domperidone & Metoclopramide	Opioid Analgesics	276	812354	0.03%	182	139471	0.13%
02040000	04070401	Beta-Adrenoceptor Blockers	Acute Migraine	276	812354	0.03%	177	139471	0.13%
05011300	12020101	Urinary-Tract Infections	Corticosteroids Used In Nasal Allergy	276	812354	0.03%	142	139471	0.10%
02040000	13040000	Beta-Adrenoceptor Blockers	Topical Corticosteroids	276	812354	0.03%	186	139471	0.13%
05010500	05011300	Macrolides	Urinary-Tract Infections	275	812354	0.03%	100	139471	0.07%
01050200	09010101	Corticosteroids In Chronic Bowel Problems	Oral Iron	275	812354	0.03%	155	139471	0.11%
01010201	11030100	Compound Alginate Preparations	Antibacterials (In Eye Preparation)	275	812354	0.03%	91	139471	0.07%
01060100	04060000	Bulk-Forming Laxatives	Products Used Against Nausea And Vertigo	274	812354	0.03%	114	139471	0.08%
04020102	04070100	Second-Generation Antipsychotic Drugs	Non-Opioid And Compound Analgesics	274	812354	0.03%	254	139471	0.18%
01010201	05011100	Compound Alginate Preparations	Metronidazole And Tinidazole	274	812354	0.03%	104	139471	0.07%
04030100	09010101	Tricyclic And Related Antidepressants	Oral Iron	273	812354	0.03%	175	139471	0.13%
04030000	04070100	Antidepressants	Non-Opioid And Compound Analgesics	272	812354	0.03%	213	139471	0.15%
04070100	06010101	Non-Opioid And Compound Analgesics	Short-Acting Insulins	272	812354	0.03%	221	139471	0.16%
05010500	13020102	Macrolides	Emollient Skin Preparations	272	812354	0.03%	132	139471	0.09%
04070100	13100300	Non-Opioid And Compound Analgesics	Antiviral Preparations (Topical	272	812354	0.03%	127	139471	0.09%
03010101	04070401	Selective Beta 2 Agonists	Acute Migraine	271	812354	0.03%	212	139471	0.15%
03010000	12020101	Bronchodilators	Corticosteroids Used In Nasal Allergy	270	812354	0.03%	180	139471	0.13%
05010300	12020101	Tetracyclines	Corticosteroids Used In Nasal Allergy	270	812354	0.03%	133	139471	0.10%
05010300	05010500	Tetracyclines	Macrolides	269	812354	0.03%	110	139471	0.08%
02110000	10010100	Antifibrinolytic Products And Haemostatics	Non-Steroidal Anti-Inflammatory Drugs	269	812354	0.03%	109	139471	0.08%
04030300	05020100	Selective Serotonin Re-Uptake Inhibitors (SSRI)	Triazole Antifungals	268	812354	0.03%	187	139471	0.13%
03020000	13020101	Corticosteroids (For Respiratory Conditions)	Emollient Bath Additives And Shower Preparations	268	812354	0.03%	199	139471	0.14%
01030100	04065600	H2-Receptor Antagonists	Products Used Against Nausea And Vertigo - 5 HT3 Antagonists	267	812354	0.03%	103	139471	0.07%
03010101	06010202	Selective Beta 2 Agonists	Biguanides (Metformin)	267	812354	0.03%	243	139471	0.17%
01020200	05010201	Other Antispasmodics	Cephalosporins	266	812354	0.03%	126	139471	0.09%
04030300	06040102	Selective Serotonin Re-Uptake Inhibitors (SSRI)	Progestogens And Progesterone Receptor Modulators	266	812354	0.03%	208	139471	0.15%
07020250	13100200	Preparations For Vaginal And Vulval Candidiasis	Antifungal Preparations (Topical	265	812354	0.03%	85	139471	0.06%
04010201	04020102	Benzodiazepines	Second-Generation Antipsychotic Drugs	264	812354	0.03%	251	139471	0.18%
03020000	05010101	Corticosteroids (For Respiratory Conditions)	Benzylpenicillin And Phenoxymethylpenicillin	264	812354	0.03%	126	139471	0.09%
01040200	05010201	Antimotility Products	Cephalosporins	264	812354	0.03%	126	139471	0.09%
05011300	06020100	Urinary-Tract Infections	Thyroid Hormones	264	812354	0.03%	176	139471	0.13%
05010103	09020102	Broad-Spectrum Penicillins	Oral Sodium And Water	263	812354	0.03%	76	139471	0.05%
01050200	02080100	Corticosteroids In Chronic Bowel Problems	Parenteral Anticoagulants	262	812354	0.03%	121	139471	0.09%
03020000	04010100	Corticosteroids (For Respiratory Conditions)	Hypnotics	262	812354	0.03%	202	139471	0.14%
02040000	06020100	Beta-Adrenoceptor Blockers	Thyroid Hormones	262	812354	0.03%	227	139471	0.16%
01020200	13040000	Other Antispasmodics	Topical Corticosteroids	262	812354	0.03%	146	139471	0.10%
05010300	13040000	Tetracyclines	Topical Corticosteroids	262	812354	0.03%	140	139471	0.10%
02040000	02050501	Beta-Adrenoceptor Blockers	Angiotensin-Converting Enzyme Inhibitors (ACE Inhibitors)	261	812354	0.03%	192	139471	0.14%
04030300	06010102	Selective Serotonin Re-Uptake Inhibitors (SSRI)	Intermediate- And Long-Acting Insulins	261	812354	0.03%	247	139471	0.18%
01020200	06040103	Other Antispasmodics	Progestogen Products Doubling (In House Use)	261	812354	0.03%	101	139471	0.07%
05010201	11030100	Cephalosporins	Antibacterials (In Eye Preparation)	261	812354	0.03%	84	139471	0.06%
01060400	11040200	Osmotic Laxatives	Other Anti-Inflammatory Eye Preparations (For The Eye)	261	812354	0.03%	134	139471	0.10%
05010103	13040200	Broad-Spectrum Penicillins	Mild Topical Corticosteroids	261	812354	0.03%	84	139471	0.06%
01030500	05011100	Proton Pump Inhibitors	Metronidazole And Tinidazole	260	812354	0.03%	112	139471	0.08%
05011100	09010101	Metronidazole And Tinidazole	Oral Iron	259	812354	0.03%	85	139471	0.06%
05010103	13090000	Broad-Spectrum Penicillins	Shampoos And Other Preparations For Scalp And Hair Conditions	259	812354	0.03%	120	139471	0.09%
01060200	03010101	Stimulant Laxatives	Selective Beta 2 Agonists	258	812354	0.03%	192	139471	0.14%
01040200	04065400	Antimotility Products	Products Used Against Nausea And Vertigo - Antihistamines	258	812354	0.03%	125	139471	0.09%
04065400	04070200	Products Used Against Nausea And Vertigo - Antihistamines	Opioid Analgesics	258	812354	0.03%	170	139471	0.12%
04030300	09010200	Selective Serotonin Re-Uptake Inhibitors (SSRI)	Drugs Used In Megaloblastic Anaemias	258	812354	0.03%	201	139471	0.14%
02040000	10010100	Beta-Adrenoceptor Blockers	Non-Steroidal Anti-Inflammatory Drugs	258	812354	0.03%	172	139471	0.12%
12010151	13040000	Anti-Inflammatory Preparations	Topical Corticosteroids	258	812354	0.03%	111	139471	0.08%
01070000	07020250	Local Products For Anal Or Rectal Problems	Preparations For Vaginal And Vulval Candidiasis	257	812354	0.03%	91	139471	0.07%
02090000	13020102	Antiplatelet Products	Emollient Skin Preparations	257	812354	0.03%	135	139471	0.10%
01010201	13100101	Compound Alginate Preparations	Antibacterial Preparations Only Used Topically	257	812354	0.03%	105	139471	0.08%
04010201	06040103	Benzodiazepines	Progestogen Products Doubling (In House Use)	256	812354	0.03%	157	139471	0.11%
02040000	04020101	Beta-Adrenoceptor Blockers	First-Generation Antipsychotic Drugs	255	812354	0.03%	174	139471	0.12%
04020101	05010101	First-Generation Antipsychotic Drugs	Benzylpenicillin And Phenoxymethylpenicillin	255	812354	0.03%	76	139471	0.05%
03040101	05011300	Non-Sedating Antihistamines	Urinary-Tract Infections	255	812354	0.03%	140	139471	0.10%
04030300	12010151	Selective Serotonin Re-Uptake Inhibitors (SSRI)	Anti-Inflammatory Preparations	255	812354	0.03%	188	139471	0.13%
04030400	04065400	Other Antidepressants	Products Used Against Nausea And Vertigo - Antihistamines	254	812354	0.03%	217	139471	0.16%
03020000	04070200	Corticosteroids (For Respiratory Conditions)	Opioid Analgesics	254	812354	0.03%	201	139471	0.14%
01020000	04070100	Antispasmodics And Products Affecting Motility	Non-Opioid And Compound Analgesics	253	812354	0.03%	140	139471	0.10%
03020000	05010102	Corticosteroids (For Respiratory Conditions)	Penicillinase-Resistant Penicillins	253	812354	0.03%	138	139471	0.10%
05011300	10010100	Urinary-Tract Infections	Non-Steroidal Anti-Inflammatory Drugs	253	812354	0.03%	110	139471	0.08%
01010201	13020101	Compound Alginate Preparations	Emollient Bath Additives And Shower Preparations	253	812354	0.03%	129	139471	0.09%
01030100	13040000	H2-Receptor Antagonists	Topical Corticosteroids	253	812354	0.03%	133	139471	0.10%
04070200	04070300	Opioid Analgesics	Neuropathic Pain	252	812354	0.03%	197	139471	0.14%
09010101	11030100	Oral Iron	Antibacterials (In Eye Preparation)	252	812354	0.03%	69	139471	0.05%
04065500	12020101	Products Used Against Nausea And Vertigo - Domperidone & Metoclopramide	Corticosteroids Used In Nasal Allergy	252	812354	0.03%	133	139471	0.10%
13040000	13100400	Topical Corticosteroids	Parasiticidal Preparations (Topical)	252	812354	0.03%	59	139471	0.04%
04030300	06010101	Selective Serotonin Re-Uptake Inhibitors (SSRI)	Short-Acting Insulins	251	812354	0.03%	240	139471	0.17%
05010102	11030100	Penicillinase-Resistant Penicillins	Antibacterials (In Eye Preparation)	251	812354	0.03%	76	139471	0.05%
02040000	02050200	Beta-Adrenoceptor Blockers	Centrally Acting Antihypertensive Products	250	812354	0.03%	147	139471	0.11%
01040200	13040000	Antimotility Products	Topical Corticosteroids	250	812354	0.03%	144	139471	0.10%
03020000	04065500	Corticosteroids (For Respiratory Conditions)	Products Used Against Nausea And Vertigo - Domperidone & Metoclopramide	249	812354	0.03%	150	139471	0.11%
04030100	04065500	Tricyclic And Related Antidepressants	Products Used Against Nausea And Vertigo - Domperidone & Metoclopramide	249	812354	0.03%	179	139471	0.13%
04060000	06040102	Products Used Against Nausea And Vertigo	Progestogens And Progesterone Receptor Modulators	249	812354	0.03%	106	139471	0.08%
04065500	09020102	Products Used Against Nausea And Vertigo - Domperidone & Metoclopramide	Oral Sodium And Water	249	812354	0.03%	58	139471	0.04%
03010101	13060102	Selective Beta 2 Agonists	Topical Antibacterials For Acne	249	812354	0.03%	146	139471	0.10%
07020250	07020251	Preparations For Vaginal And Vulval Candidiasis	Preparations For Other Vaginal Infections	248	812354	0.03%	76	139471	0.05%
06040102	09010101	Progestogens And Progesterone Receptor Modulators	Oral Iron	248	812354	0.03%	83	139471	0.06%
04070100	09020102	Non-Opioid And Compound Analgesics	Oral Sodium And Water	248	812354	0.03%	90	139471	0.06%
13040000	13060102	Topical Corticosteroids	Topical Antibacterials For Acne	248	812354	0.03%	87	139471	0.06%
03010000	03040101	Bronchodilators	Non-Sedating Antihistamines	247	812354	0.03%	166	139471	0.12%
01030500	05010101	Proton Pump Inhibitors	Benzylpenicillin And Phenoxymethylpenicillin	247	812354	0.03%	142	139471	0.10%
01070200	09010101	Compound Haemorrhoid Products With Corticosteroids	Oral Iron	247	812354	0.03%	73	139471	0.05%
01010201	03010000	Compound Alginate Preparations	Bronchodilators	246	812354	0.03%	161	139471	0.12%
01020200	04060000	Other Antispasmodics	Products Used Against Nausea And Vertigo	246	812354	0.03%	148	139471	0.11%
01030100	05010201	H2-Receptor Antagonists	Cephalosporins	246	812354	0.03%	117	139471	0.08%
03030200	05010103	Leukotriene Receptor Antagonists	Broad-Spectrum Penicillins	245	812354	0.03%	189	139471	0.14%
03010000	07020250	Bronchodilators	Preparations For Vaginal And Vulval Candidiasis	245	812354	0.03%	135	139471	0.10%
05010101	12020101	Benzylpenicillin And Phenoxymethylpenicillin	Corticosteroids Used In Nasal Allergy	245	812354	0.03%	118	139471	0.08%
03010000	04030300	Bronchodilators	Selective Serotonin Re-Uptake Inhibitors (SSRI)	244	812354	0.03%	207	139471	0.15%
01010101	04070100	Aluminium- And Magnesium- Containing Antacids	Non-Opioid And Compound Analgesics	244	812354	0.03%	94	139471	0.07%
04030400	09010101	Other Antidepressants	Oral Iron	244	812354	0.03%	203	139471	0.15%
02090000	12020101	Antiplatelet Products	Corticosteroids Used In Nasal Allergy	244	812354	0.03%	161	139471	0.12%
04030300	04080100	Selective Serotonin Re-Uptake Inhibitors (SSRI)	Control Of Epilepsy	243	812354	0.03%	229	139471	0.16%
05010500	05010800	Macrolides	Sulphonamides And Trimethoprim	243	812354	0.03%	86	139471	0.06%
03010101	09060700	Selective Beta 2 Agonists	Multivitamin And Multimineral Preparations	243	812354	0.03%	139	139471	0.10%
05010103	10030250	Broad-Spectrum Penicillins	Topical Nsaids And Counter Irritants	243	812354	0.03%	108	139471	0.08%
04060000	04070401	Products Used Against Nausea And Vertigo	Acute Migraine	242	812354	0.03%	142	139471	0.10%
01030500	01060100	Proton Pump Inhibitors	Bulk-Forming Laxatives	241	812354	0.03%	132	139471	0.09%
01030100	03040101	H2-Receptor Antagonists	Non-Sedating Antihistamines	241	812354	0.03%	155	139471	0.11%
04065400	05010101	Products Used Against Nausea And Vertigo - Antihistamines	Benzylpenicillin And Phenoxymethylpenicillin	241	812354	0.03%	91	139471	0.07%
01040200	09010101	Antimotility Products	Oral Iron	241	812354	0.03%	114	139471	0.08%
04030100	12020101	Tricyclic And Related Antidepressants	Corticosteroids Used In Nasal Allergy	241	812354	0.03%	194	139471	0.14%
05010102	13020101	Penicillinase-Resistant Penicillins	Emollient Bath Additives And Shower Preparations	240	812354	0.03%	125	139471	0.09%
04010201	05010201	Benzodiazepines	Cephalosporins	239	812354	0.03%	158	139471	0.11%
10010100	10030250	Non-Steroidal Anti-Inflammatory Drugs	Topical Nsaids And Counter Irritants	239	812354	0.03%	100	139471	0.07%
13040000	13040100	Topical Corticosteroids	Topical Corticosteroids With Antimicrobials	239	812354	0.03%	93	139471	0.07%
01030500	05010102	Proton Pump Inhibitors	Penicillinase-Resistant Penicillins	238	812354	0.03%	136	139471	0.10%
03040102	06040103	Sedating Antihistamines	Progestogen Products Doubling (In House Use)	238	812354	0.03%	87	139471	0.06%
07020250	12010151	Preparations For Vaginal And Vulval Candidiasis	Anti-Inflammatory Preparations	237	812354	0.03%	83	139471	0.06%
12020101	13020100	Corticosteroids Used In Nasal Allergy	Emollients	237	812354	0.03%	153	139471	0.11%
02090000	03020000	Antiplatelet Products	Corticosteroids (For Respiratory Conditions)	236	812354	0.03%	154	139471	0.11%
04010100	12020101	Hypnotics	Corticosteroids Used In Nasal Allergy	236	812354	0.03%	168	139471	0.12%
01050200	02090000	Corticosteroids In Chronic Bowel Problems	Antiplatelet Products	235	812354	0.03%	153	139471	0.11%
02090000	03040101	Antiplatelet Products	Non-Sedating Antihistamines	235	812354	0.03%	152	139471	0.11%
02040000	04070200	Beta-Adrenoceptor Blockers	Opioid Analgesics	235	812354	0.03%	186	139471	0.13%
04030300	04070300	Selective Serotonin Re-Uptake Inhibitors (SSRI)	Neuropathic Pain	235	812354	0.03%	208	139471	0.15%
05011100	10010100	Metronidazole And Tinidazole	Non-Steroidal Anti-Inflammatory Drugs	235	812354	0.03%	100	139471	0.07%
03040102	10010100	Sedating Antihistamines	Non-Steroidal Anti-Inflammatory Drugs	235	812354	0.03%	112	139471	0.08%
05011300	13020102	Urinary-Tract Infections	Emollient Skin Preparations	235	812354	0.03%	98	139471	0.07%
02040000	05010201	Beta-Adrenoceptor Blockers	Cephalosporins	234	812354	0.03%	149	139471	0.11%
03040101	05010800	Non-Sedating Antihistamines	Sulphonamides And Trimethoprim	234	812354	0.03%	116	139471	0.08%
05010201	13020100	Cephalosporins	Emollients	234	812354	0.03%	97	139471	0.07%
03040101	04030400	Non-Sedating Antihistamines	Other Antidepressants	232	812354	0.03%	205	139471	0.15%
01030500	04105100	Proton Pump Inhibitors	Substance Dependence - Nicotine Dependence	232	812354	0.03%	136	139471	0.10%
04020100	05010201	Antipsychotic Products	Cephalosporins	232	812354	0.03%	61	139471	0.04%
06040103	11030100	Progestogen Products Doubling (In House Use)	Antibacterials (In Eye Preparation)	232	812354	0.03%	53	139471	0.04%
13040000	71580100	Topical Corticosteroids	Emollient Cream	232	812354	0.03%	99	139471	0.07%
04070100	04070402	Non-Opioid And Compound Analgesics	Prophylaxis Of Migraine	231	812354	0.03%	168	139471	0.12%
03040101	05010101	Non-Sedating Antihistamines	Benzylpenicillin And Phenoxymethylpenicillin	231	812354	0.03%	98	139471	0.07%
03040102	05010102	Sedating Antihistamines	Penicillinase-Resistant Penicillins	231	812354	0.03%	94	139471	0.07%
04065400	05010102	Products Used Against Nausea And Vertigo - Antihistamines	Penicillinase-Resistant Penicillins	231	812354	0.03%	96	139471	0.07%
04070401	07020250	Acute Migraine	Preparations For Vaginal And Vulval Candidiasis	231	812354	0.03%	139	139471	0.10%
05010102	13020100	Penicillinase-Resistant Penicillins	Emollients	231	812354	0.03%	104	139471	0.07%
04070100	13090000	Non-Opioid And Compound Analgesics	Shampoos And Other Preparations For Scalp And Hair Conditions	231	812354	0.03%	126	139471	0.09%
07020250	13100300	Preparations For Vaginal And Vulval Candidiasis	Antiviral Preparations (Topical	231	812354	0.03%	98	139471	0.07%
03020000	05011300	Corticosteroids (For Respiratory Conditions)	Urinary-Tract Infections	230	812354	0.03%	127	139471	0.09%
05010500	06020100	Macrolides	Thyroid Hormones	229	812354	0.03%	153	139471	0.11%
04030400	05010201	Other Antidepressants	Cephalosporins	228	812354	0.03%	197	139471	0.14%
03040102	04010100	Sedating Antihistamines	Hypnotics	227	812354	0.03%	133	139471	0.10%
01040200	04020101	Antimotility Products	First-Generation Antipsychotic Drugs	227	812354	0.03%	109	139471	0.08%
03010101	04020102	Selective Beta 2 Agonists	Second-Generation Antipsychotic Drugs	227	812354	0.03%	225	139471	0.16%
01030500	09060700	Proton Pump Inhibitors	Multivitamin And Multimineral Preparations	227	812354	0.03%	141	139471	0.10%
05010103	12010300	Broad-Spectrum Penicillins	Drugs Acting On The Ear - Removal Of Ear Wax	227	812354	0.03%	54	139471	0.04%
05010103	05011200	Broad-Spectrum Penicillins	Quinolones	226	812354	0.03%	85	139471	0.06%
01010201	09060700	Compound Alginate Preparations	Multivitamin And Multimineral Preparations	226	812354	0.03%	88	139471	0.06%
05010800	12020101	Sulphonamides And Trimethoprim	Corticosteroids Used In Nasal Allergy	226	812354	0.03%	117	139471	0.08%
02050200	02090000	Centrally Acting Antihypertensive Products	Antiplatelet Products	225	812354	0.03%	140	139471	0.10%
01050200	03030200	Corticosteroids In Chronic Bowel Problems	Leukotriene Receptor Antagonists	225	812354	0.03%	168	139471	0.12%
04010100	05011300	Hypnotics	Urinary-Tract Infections	225	812354	0.03%	129	139471	0.09%
04070401	10010100	Acute Migraine	Non-Steroidal Anti-Inflammatory Drugs	225	812354	0.03%	135	139471	0.10%
04105100	13020102	Substance Dependence - Nicotine Dependence	Emollient Skin Preparations	224	812354	0.03%	95	139471	0.07%
01010101	01010201	Aluminium- And Magnesium- Containing Antacids	Compound Alginate Preparations	223	812354	0.03%	67	139471	0.05%
03010101	03010200	Selective Beta 2 Agonists	Antimuscarinic Bronchodilators	223	812354	0.03%	179	139471	0.13%
01050200	04060000	Corticosteroids In Chronic Bowel Problems	Products Used Against Nausea And Vertigo	223	812354	0.03%	137	139471	0.10%
01020200	09010101	Other Antispasmodics	Oral Iron	223	812354	0.03%	121	139471	0.09%
01020200	10010100	Other Antispasmodics	Non-Steroidal Anti-Inflammatory Drugs	222	812354	0.03%	128	139471	0.09%
13030000	13040000	Topical Local Anaesthetics And Antipruritics	Topical Corticosteroids	222	812354	0.03%	76	139471	0.05%
07020250	13090000	Preparations For Vaginal And Vulval Candidiasis	Shampoos And Other Preparations For Scalp And Hair Conditions	222	812354	0.03%	91	139471	0.07%
01050200	01050300	Corticosteroids In Chronic Bowel Problems	Products Affecting The Immune Response In Chronic Bowel Problems	221	812354	0.03%	137	139471	0.10%
01040200	04030100	Antimotility Products	Tricyclic And Related Antidepressants	221	812354	0.03%	174	139471	0.12%
03020000	05010800	Corticosteroids (For Respiratory Conditions)	Sulphonamides And Trimethoprim	221	812354	0.03%	133	139471	0.10%
04010100	13020102	Hypnotics	Emollient Skin Preparations	221	812354	0.03%	142	139471	0.10%
02090000	04030100	Antiplatelet Products	Tricyclic And Related Antidepressants	220	812354	0.03%	159	139471	0.11%
04065500	05010800	Products Used Against Nausea And Vertigo - Domperidone & Metoclopramide	Sulphonamides And Trimethoprim	220	812354	0.03%	72	139471	0.05%
04030300	10030250	Selective Serotonin Re-Uptake Inhibitors (SSRI)	Topical Nsaids And Counter Irritants	220	812354	0.03%	170	139471	0.12%
10010100	13020100	Non-Steroidal Anti-Inflammatory Drugs	Emollients	220	812354	0.03%	99	139471	0.07%
01060400	13100101	Osmotic Laxatives	Antibacterial Preparations Only Used Topically	220	812354	0.03%	99	139471	0.07%
04020100	07020250	Antipsychotic Products	Preparations For Vaginal And Vulval Candidiasis	219	812354	0.03%	80	139471	0.06%
11030100	11040200	Antibacterials (In Eye Preparation)	Other Anti-Inflammatory Eye Preparations (For The Eye)	219	812354	0.03%	72	139471	0.05%
05010103	13020103	Broad-Spectrum Penicillins	Antimicrobial Emollients	219	812354	0.03%	109	139471	0.08%
01050200	01060400	Corticosteroids In Chronic Bowel Problems	Osmotic Laxatives	218	812354	0.03%	127	139471	0.09%
01070200	03010101	Compound Haemorrhoid Products With Corticosteroids	Selective Beta 2 Agonists	218	812354	0.03%	150	139471	0.11%
04065500	05010500	Products Used Against Nausea And Vertigo - Domperidone & Metoclopramide	Macrolides	218	812354	0.03%	102	139471	0.07%
04030100	06020100	Tricyclic And Related Antidepressants	Thyroid Hormones	218	812354	0.03%	196	139471	0.14%
04065500	06020100	Products Used Against Nausea And Vertigo - Domperidone & Metoclopramide	Thyroid Hormones	218	812354	0.03%	166	139471	0.12%
05010103	13100200	Broad-Spectrum Penicillins	Antifungal Preparations (Topical	218	812354	0.03%	84	139471	0.06%
01010101	05010103	Aluminium- And Magnesium- Containing Antacids	Broad-Spectrum Penicillins	217	812354	0.03%	68	139471	0.05%
02090000	10010100	Antiplatelet Products	Non-Steroidal Anti-Inflammatory Drugs	217	812354	0.03%	132	139471	0.09%
05010201	11040200	Cephalosporins	Other Anti-Inflammatory Eye Preparations (For The Eye)	217	812354	0.03%	102	139471	0.07%
06040103	13020100	Progestogen Products Doubling (In House Use)	Emollients	217	812354	0.03%	76	139471	0.05%
07020250	09060700	Preparations For Vaginal And Vulval Candidiasis	Multivitamin And Multimineral Preparations	216	812354	0.03%	84	139471	0.06%
01060100	10010100	Bulk-Forming Laxatives	Non-Steroidal Anti-Inflammatory Drugs	216	812354	0.03%	81	139471	0.06%
01010201	10030250	Compound Alginate Preparations	Topical Nsaids And Counter Irritants	216	812354	0.03%	99	139471	0.07%
06040103	11040200	Progestogen Products Doubling (In House Use)	Other Anti-Inflammatory Eye Preparations (For The Eye)	216	812354	0.03%	77	139471	0.06%
01010201	04065600	Compound Alginate Preparations	Products Used Against Nausea And Vertigo - 5 HT3 Antagonists	215	812354	0.03%	76	139471	0.05%
01060200	09010101	Stimulant Laxatives	Oral Iron	215	812354	0.03%	90	139471	0.06%
03010101	12010151	Selective Beta 2 Agonists	Anti-Inflammatory Preparations	215	812354	0.03%	144	139471	0.10%
01060400	13020101	Osmotic Laxatives	Emollient Bath Additives And Shower Preparations	215	812354	0.03%	117	139471	0.08%
03040102	13030000	Sedating Antihistamines	Topical Local Anaesthetics And Antipruritics	215	812354	0.03%	74	139471	0.05%
13020102	13090100	Emollient Skin Preparations	Shampoos And Other Scalp Preparations	215	812354	0.03%	112	139471	0.08%
05010500	13100101	Macrolides	Antibacterial Preparations Only Used Topically	215	812354	0.03%	79	139471	0.06%
01020100	04070100	Antimuscarinics	Non-Opioid And Compound Analgesics	214	812354	0.03%	113	139471	0.08%
04065600	04070100	Products Used Against Nausea And Vertigo - 5 HT3 Antagonists	Non-Opioid And Compound Analgesics	214	812354	0.03%	112	139471	0.08%
04030100	05010500	Tricyclic And Related Antidepressants	Macrolides	214	812354	0.03%	161	139471	0.12%
04070200	12020101	Opioid Analgesics	Corticosteroids Used In Nasal Allergy	214	812354	0.03%	166	139471	0.12%
13020102	13100101	Emollient Skin Preparations	Antibacterial Preparations Only Used Topically	214	812354	0.03%	92	139471	0.07%
01050200	03010000	Corticosteroids In Chronic Bowel Problems	Bronchodilators	213	812354	0.03%	112	139471	0.08%
03020000	04010201	Corticosteroids (For Respiratory Conditions)	Benzodiazepines	213	812354	0.03%	186	139471	0.13%
01060100	04020101	Bulk-Forming Laxatives	First-Generation Antipsychotic Drugs	213	812354	0.03%	87	139471	0.06%
04010100	05010500	Hypnotics	Macrolides	213	812354	0.03%	138	139471	0.10%
03040101	11030100	Non-Sedating Antihistamines	Antibacterials (In Eye Preparation)	213	812354	0.03%	98	139471	0.07%
01050200	13020102	Corticosteroids In Chronic Bowel Problems	Emollient Skin Preparations	213	812354	0.03%	149	139471	0.11%
09060700	13040000	Multivitamin And Multimineral Preparations	Topical Corticosteroids	213	812354	0.03%	97	139471	0.07%
04030000	04030300	Antidepressants	Selective Serotonin Re-Uptake Inhibitors (SSRI)	212	812354	0.03%	188	139471	0.13%
03040101	04065500	Non-Sedating Antihistamines	Products Used Against Nausea And Vertigo - Domperidone & Metoclopramide	212	812354	0.03%	118	139471	0.08%
04070200	05010500	Opioid Analgesics	Macrolides	212	812354	0.03%	157	139471	0.11%
01060400	13060102	Osmotic Laxatives	Topical Antibacterials For Acne	212	812354	0.03%	92	139471	0.07%
01030100	02090000	H2-Receptor Antagonists	Antiplatelet Products	211	812354	0.03%	120	139471	0.09%
01040200	04065500	Antimotility Products	Products Used Against Nausea And Vertigo - Domperidone & Metoclopramide	211	812354	0.03%	108	139471	0.08%
04010201	09010101	Benzodiazepines	Oral Iron	211	812354	0.03%	151	139471	0.11%
03040101	13020103	Non-Sedating Antihistamines	Antimicrobial Emollients	211	812354	0.03%	121	139471	0.09%
04020100	04065400	Antipsychotic Products	Products Used Against Nausea And Vertigo - Antihistamines	210	812354	0.03%	57	139471	0.04%
01010201	04070401	Compound Alginate Preparations	Acute Migraine	210	812354	0.03%	136	139471	0.10%
03040101	05010300	Non-Sedating Antihistamines	Tetracyclines	210	812354	0.03%	115	139471	0.08%
01030500	04065600	Proton Pump Inhibitors	Products Used Against Nausea And Vertigo - 5 HT3 Antagonists	209	812354	0.03%	109	139471	0.08%
04020100	04030300	Antipsychotic Products	Selective Serotonin Re-Uptake Inhibitors (SSRI)	208	812354	0.03%	151	139471	0.11%
03040101	04105100	Non-Sedating Antihistamines	Substance Dependence - Nicotine Dependence	208	812354	0.03%	108	139471	0.08%
03040102	05011300	Sedating Antihistamines	Urinary-Tract Infections	208	812354	0.03%	80	139471	0.06%
01020200	03040101	Other Antispasmodics	Non-Sedating Antihistamines	207	812354	0.03%	134	139471	0.10%
07020250	13020103	Preparations For Vaginal And Vulval Candidiasis	Antimicrobial Emollients	207	812354	0.03%	94	139471	0.07%
13020101	71580200	Emollient Bath Additives And Shower Preparations	Emollient Ointment	207	812354	0.03%	95	139471	0.07%
04020101	05010102	First-Generation Antipsychotic Drugs	Penicillinase-Resistant Penicillins	206	812354	0.03%	86	139471	0.06%
03040102	05010500	Sedating Antihistamines	Macrolides	206	812354	0.03%	101	139471	0.07%
04105100	05010500	Substance Dependence - Nicotine Dependence	Macrolides	205	812354	0.03%	84	139471	0.06%
01040200	06040103	Antimotility Products	Progestogen Products Doubling (In House Use)	205	812354	0.03%	89	139471	0.06%
03010101	10030250	Selective Beta 2 Agonists	Topical Nsaids And Counter Irritants	205	812354	0.03%	135	139471	0.10%
05010102	12020101	Penicillinase-Resistant Penicillins	Corticosteroids Used In Nasal Allergy	205	812354	0.03%	116	139471	0.08%
05010201	13100101	Cephalosporins	Antibacterial Preparations Only Used Topically	205	812354	0.03%	80	139471	0.06%
03020000	04030400	Corticosteroids (For Respiratory Conditions)	Other Antidepressants	204	812354	0.03%	194	139471	0.14%
04070200	04105100	Opioid Analgesics	Substance Dependence - Nicotine Dependence	204	812354	0.03%	125	139471	0.09%
04080100	05010103	Control Of Epilepsy	Broad-Spectrum Penicillins	204	812354	0.03%	140	139471	0.10%
06010202	09010101	Biguanides (Metformin)	Oral Iron	204	812354	0.03%	138	139471	0.10%
05010101	13020102	Benzylpenicillin And Phenoxymethylpenicillin	Emollient Skin Preparations	204	812354	0.03%	90	139471	0.06%
01060200	13040000	Stimulant Laxatives	Topical Corticosteroids	204	812354	0.03%	118	139471	0.08%
01030500	04070401	Proton Pump Inhibitors	Acute Migraine	203	812354	0.02%	151	139471	0.11%
04105100	05010102	Substance Dependence - Nicotine Dependence	Penicillinase-Resistant Penicillins	203	812354	0.02%	73	139471	0.05%
02080100	05010103	Parenteral Anticoagulants	Broad-Spectrum Penicillins	203	812354	0.02%	108	139471	0.08%
01060200	04020101	Stimulant Laxatives	First-Generation Antipsychotic Drugs	202	812354	0.02%	95	139471	0.07%
04010100	06020100	Hypnotics	Thyroid Hormones	202	812354	0.02%	167	139471	0.12%
05010102	06020100	Penicillinase-Resistant Penicillins	Thyroid Hormones	202	812354	0.02%	132	139471	0.09%
06010202	13040000	Biguanides (Metformin)	Topical Corticosteroids	202	812354	0.02%	144	139471	0.10%
04020102	05010103	Second-Generation Antipsychotic Drugs	Broad-Spectrum Penicillins	201	812354	0.02%	184	139471	0.13%
05010101	06020100	Benzylpenicillin And Phenoxymethylpenicillin	Thyroid Hormones	201	812354	0.02%	122	139471	0.09%
05010300	10010100	Tetracyclines	Non-Steroidal Anti-Inflammatory Drugs	201	812354	0.02%	84	139471	0.06%
07020250	12030100	Preparations For Vaginal And Vulval Candidiasis	Drugs For Oral Ulceration And Inflammation	201	812354	0.02%	72	139471	0.05%
04070100	13100400	Non-Opioid And Compound Analgesics	Parasiticidal Preparations (Topical)	201	812354	0.02%	72	139471	0.05%
04050100	04070100	Anti-Obesity Products Acting On The Gastro-Intestinal Tract	Non-Opioid And Compound Analgesics	200	812354	0.02%	126	139471	0.09%
01030500	06010202	Proton Pump Inhibitors	Biguanides (Metformin)	200	812354	0.02%	166	139471	0.12%
01060400	11030100	Osmotic Laxatives	Antibacterials (In Eye Preparation)	200	812354	0.02%	78	139471	0.06%
12020101	13020101	Corticosteroids Used In Nasal Allergy	Emollient Bath Additives And Shower Preparations	200	812354	0.02%	146	139471	0.10%
01010201	13060102	Compound Alginate Preparations	Topical Antibacterials For Acne	199	812354	0.02%	79	139471	0.06%
04010201	04065400	Benzodiazepines	Products Used Against Nausea And Vertigo - Antihistamines	198	812354	0.02%	134	139471	0.10%
04030000	04070200	Antidepressants	Opioid Analgesics	198	812354	0.02%	164	139471	0.12%
04010100	04105100	Hypnotics	Substance Dependence - Nicotine Dependence	198	812354	0.02%	122	139471	0.09%
13020102	13050200	Emollient Skin Preparations	Preparations For Psoriasis	198	812354	0.02%	108	139471	0.08%
03010101	09010200	Selective Beta 2 Agonists	Drugs Used In Megaloblastic Anaemias	197	812354	0.02%	155	139471	0.11%
01050200	09060400	Corticosteroids In Chronic Bowel Problems	Vitamin D	197	812354	0.02%	148	139471	0.11%
04070100	11080100	Non-Opioid And Compound Analgesics	Tear Deficiency	197	812354	0.02%	115	139471	0.08%
04070100	13020103	Non-Opioid And Compound Analgesics	Antimicrobial Emollients	197	812354	0.02%	117	139471	0.08%
02040000	03010101	Beta-Adrenoceptor Blockers	Selective Beta 2 Agonists	196	812354	0.02%	156	139471	0.11%
01020200	04065500	Other Antispasmodics	Products Used Against Nausea And Vertigo - Domperidone & Metoclopramide	196	812354	0.02%	116	139471	0.08%
04065500	05010101	Products Used Against Nausea And Vertigo - Domperidone & Metoclopramide	Benzylpenicillin And Phenoxymethylpenicillin	196	812354	0.02%	70	139471	0.05%
04030100	05011300	Tricyclic And Related Antidepressants	Urinary-Tract Infections	196	812354	0.02%	142	139471	0.10%
01060100	06040103	Bulk-Forming Laxatives	Progestogen Products Doubling (In House Use)	196	812354	0.02%	64	139471	0.05%
04060000	11040200	Products Used Against Nausea And Vertigo	Other Anti-Inflammatory Eye Preparations (For The Eye)	196	812354	0.02%	106	139471	0.08%
01060200	05010201	Stimulant Laxatives	Cephalosporins	195	812354	0.02%	90	139471	0.06%
11030100	12020101	Antibacterials (In Eye Preparation)	Corticosteroids Used In Nasal Allergy	195	812354	0.02%	81	139471	0.06%
01010201	13090000	Compound Alginate Preparations	Shampoos And Other Preparations For Scalp And Hair Conditions	195	812354	0.02%	97	139471	0.07%
01060200	04070200	Stimulant Laxatives	Opioid Analgesics	194	812354	0.02%	146	139471	0.10%
05010800	06020100	Sulphonamides And Trimethoprim	Thyroid Hormones	194	812354	0.02%	141	139471	0.10%
01060100	12020101	Bulk-Forming Laxatives	Corticosteroids Used In Nasal Allergy	194	812354	0.02%	118	139471	0.08%
04070100	13040200	Non-Opioid And Compound Analgesics	Mild Topical Corticosteroids	194	812354	0.02%	80	139471	0.06%
01020200	04020101	Other Antispasmodics	First-Generation Antipsychotic Drugs	193	812354	0.02%	96	139471	0.07%
01040200	04010201	Antimotility Products	Benzodiazepines	192	812354	0.02%	126	139471	0.09%
01020200	04030100	Other Antispasmodics	Tricyclic And Related Antidepressants	192	812354	0.02%	140	139471	0.10%
05010101	05010800	Benzylpenicillin And Phenoxymethylpenicillin	Sulphonamides And Trimethoprim	192	812354	0.02%	60	139471	0.04%
05010102	05011100	Penicillinase-Resistant Penicillins	Metronidazole And Tinidazole	192	812354	0.02%	68	139471	0.05%
03010101	05020100	Selective Beta 2 Agonists	Triazole Antifungals	192	812354	0.02%	124	139471	0.09%
01050100	09010101	Aminosalicylates	Oral Iron	192	812354	0.02%	100	139471	0.07%
01060400	09060700	Osmotic Laxatives	Multivitamin And Multimineral Preparations	192	812354	0.02%	93	139471	0.07%
05010101	11030100	Benzylpenicillin And Phenoxymethylpenicillin	Antibacterials (In Eye Preparation)	192	812354	0.02%	62	139471	0.04%
02090000	04070200	Antiplatelet Products	Opioid Analgesics	191	812354	0.02%	147	139471	0.11%
02090000	05010101	Antiplatelet Products	Benzylpenicillin And Phenoxymethylpenicillin	191	812354	0.02%	75	139471	0.05%
05010201	09060400	Cephalosporins	Vitamin D	191	812354	0.02%	72	139471	0.05%
02050200	02060200	Centrally Acting Antihypertensive Products	Calcium-Channel Blockers	190	812354	0.02%	114	139471	0.08%
04060000	05011100	Products Used Against Nausea And Vertigo	Metronidazole And Tinidazole	190	812354	0.02%	68	139471	0.05%
05010201	05020100	Cephalosporins	Triazole Antifungals	190	812354	0.02%	75	139471	0.05%
05010500	11030100	Macrolides	Antibacterials (In Eye Preparation)	190	812354	0.02%	60	139471	0.04%
01030100	12020101	H2-Receptor Antagonists	Corticosteroids Used In Nasal Allergy	190	812354	0.02%	131	139471	0.09%
03030200	12020101	Leukotriene Receptor Antagonists	Corticosteroids Used In Nasal Allergy	190	812354	0.02%	163	139471	0.12%
01030500	04020102	Proton Pump Inhibitors	Second-Generation Antipsychotic Drugs	189	812354	0.02%	180	139471	0.13%
04070100	05011200	Non-Opioid And Compound Analgesics	Quinolones	189	812354	0.02%	82	139471	0.06%
01030100	10010100	H2-Receptor Antagonists	Non-Steroidal Anti-Inflammatory Drugs	189	812354	0.02%	97	139471	0.07%
01060200	10010100	Stimulant Laxatives	Non-Steroidal Anti-Inflammatory Drugs	189	812354	0.02%	98	139471	0.07%
03010101	12030100	Selective Beta 2 Agonists	Drugs For Oral Ulceration And Inflammation	189	812354	0.02%	104	139471	0.07%
03040101	13030000	Non-Sedating Antihistamines	Topical Local Anaesthetics And Antipruritics	189	812354	0.02%	67	139471	0.05%
01030100	04070200	H2-Receptor Antagonists	Opioid Analgesics	188	812354	0.02%	134	139471	0.10%
04070401	04070402	Acute Migraine	Prophylaxis Of Migraine	188	812354	0.02%	114	139471	0.08%
03100000	05010103	Systemic Nasal Decongestants	Broad-Spectrum Penicillins	188	812354	0.02%	62	139471	0.04%
05010201	06040102	Cephalosporins	Progestogens And Progesterone Receptor Modulators	188	812354	0.02%	78	139471	0.06%
04030300	13020103	Selective Serotonin Re-Uptake Inhibitors (SSRI)	Antimicrobial Emollients	188	812354	0.02%	144	139471	0.10%
01060400	01070100	Osmotic Laxatives	Soothing Haemorrhoid Products	187	812354	0.02%	53	139471	0.04%
03010101	03010300	Selective Beta 2 Agonists	Theophylline	187	812354	0.02%	148	139471	0.11%
01060100	04065400	Bulk-Forming Laxatives	Products Used Against Nausea And Vertigo - Antihistamines	187	812354	0.02%	78	139471	0.06%
01050100	04070100	Aminosalicylates	Non-Opioid And Compound Analgesics	187	812354	0.02%	121	139471	0.09%
05010103	05030201	Broad-Spectrum Penicillins	Herpes Simplex And Varicella-Zoster Infection	187	812354	0.02%	60	139471	0.04%
04070401	13040000	Acute Migraine	Topical Corticosteroids	187	812354	0.02%	114	139471	0.08%
05010500	13060102	Macrolides	Topical Antibacterials For Acne	187	812354	0.02%	57	139471	0.04%
04030300	13090000	Selective Serotonin Re-Uptake Inhibitors (SSRI)	Shampoos And Other Preparations For Scalp And Hair Conditions	187	812354	0.02%	144	139471	0.10%
01050200	03040102	Corticosteroids In Chronic Bowel Problems	Sedating Antihistamines	186	812354	0.02%	112	139471	0.08%
02080100	04070100	Parenteral Anticoagulants	Non-Opioid And Compound Analgesics	186	812354	0.02%	126	139471	0.09%
04030100	05010800	Tricyclic And Related Antidepressants	Sulphonamides And Trimethoprim	186	812354	0.02%	130	139471	0.09%
05011100	07020251	Metronidazole And Tinidazole	Preparations For Other Vaginal Infections	186	812354	0.02%	61	139471	0.04%
04020101	09020100	First-Generation Antipsychotic Drugs	Oral Preparations For Fluid And Electrolyte Imbalance	186	812354	0.02%	53	139471	0.04%
04070100	13030000	Non-Opioid And Compound Analgesics	Topical Local Anaesthetics And Antipruritics	186	812354	0.02%	77	139471	0.06%
04070100	13090100	Non-Opioid And Compound Analgesics	Shampoos And Other Scalp Preparations	186	812354	0.02%	100	139471	0.07%
09010101	13100101	Oral Iron	Antibacterial Preparations Only Used Topically	186	812354	0.02%	65	139471	0.05%
02040000	04065400	Beta-Adrenoceptor Blockers	Products Used Against Nausea And Vertigo - Antihistamines	185	812354	0.02%	113	139471	0.08%
04065400	04105100	Products Used Against Nausea And Vertigo - Antihistamines	Substance Dependence - Nicotine Dependence	185	812354	0.02%	72	139471	0.05%
04070200	05010102	Opioid Analgesics	Penicillinase-Resistant Penicillins	185	812354	0.02%	115	139471	0.08%
04105100	05011300	Substance Dependence - Nicotine Dependence	Urinary-Tract Infections	185	812354	0.02%	70	139471	0.05%
03040102	06020100	Sedating Antihistamines	Thyroid Hormones	185	812354	0.02%	133	139471	0.10%
02090000	06040103	Antiplatelet Products	Progestogen Products Doubling (In House Use)	185	812354	0.02%	61	139471	0.04%
04030300	12030100	Selective Serotonin Re-Uptake Inhibitors (SSRI)	Drugs For Oral Ulceration And Inflammation	185	812354	0.02%	140	139471	0.10%
03040101	04010201	Non-Sedating Antihistamines	Benzodiazepines	184	812354	0.02%	148	139471	0.11%
01010201	06010202	Compound Alginate Preparations	Biguanides (Metformin)	183	812354	0.02%	134	139471	0.10%
05020100	06040103	Triazole Antifungals	Progestogen Products Doubling (In House Use)	183	812354	0.02%	61	139471	0.04%
01050200	06040103	Corticosteroids In Chronic Bowel Problems	Progestogen Products Doubling (In House Use)	183	812354	0.02%	97	139471	0.07%
07020250	10030250	Preparations For Vaginal And Vulval Candidiasis	Topical Nsaids And Counter Irritants	183	812354	0.02%	74	139471	0.05%
04105100	05010101	Substance Dependence - Nicotine Dependence	Benzylpenicillin And Phenoxymethylpenicillin	182	812354	0.02%	56	139471	0.04%
01030500	09010200	Proton Pump Inhibitors	Drugs Used In Megaloblastic Anaemias	182	812354	0.02%	123	139471	0.09%
04060000	09010200	Products Used Against Nausea And Vertigo	Drugs Used In Megaloblastic Anaemias	182	812354	0.02%	88	139471	0.06%
02090000	09060700	Antiplatelet Products	Multivitamin And Multimineral Preparations	182	812354	0.02%	84	139471	0.06%
09010101	13020101	Oral Iron	Emollient Bath Additives And Shower Preparations	182	812354	0.02%	76	139471	0.05%
13040000	13100300	Topical Corticosteroids	Antiviral Preparations (Topical	182	812354	0.02%	90	139471	0.06%
04030400	04065500	Other Antidepressants	Products Used Against Nausea And Vertigo - Domperidone & Metoclopramide	181	812354	0.02%	142	139471	0.10%
04060000	05010300	Products Used Against Nausea And Vertigo	Tetracyclines	181	812354	0.02%	93	139471	0.07%
05010101	05011300	Benzylpenicillin And Phenoxymethylpenicillin	Urinary-Tract Infections	181	812354	0.02%	65	139471	0.05%
10010100	11040200	Non-Steroidal Anti-Inflammatory Drugs	Other Anti-Inflammatory Eye Preparations (For The Eye)	181	812354	0.02%	85	139471	0.06%
01030500	11040200	Proton Pump Inhibitors	Other Anti-Inflammatory Eye Preparations (For The Eye)	181	812354	0.02%	123	139471	0.09%
06040103	13100101	Progestogen Products Doubling (In House Use)	Antibacterial Preparations Only Used Topically	181	812354	0.02%	45	139471	0.03%
03010101	13100300	Selective Beta 2 Agonists	Antiviral Preparations (Topical	181	812354	0.02%	119	139471	0.09%
05010103	13100400	Broad-Spectrum Penicillins	Parasiticidal Preparations (Topical)	181	812354	0.02%	64	139471	0.05%
01060100	03040101	Bulk-Forming Laxatives	Non-Sedating Antihistamines	180	812354	0.02%	111	139471	0.08%
01060400	05010300	Osmotic Laxatives	Tetracyclines	180	812354	0.02%	87	139471	0.06%
01010201	05020100	Compound Alginate Preparations	Triazole Antifungals	180	812354	0.02%	84	139471	0.06%
10010100	11030100	Non-Steroidal Anti-Inflammatory Drugs	Antibacterials (In Eye Preparation)	180	812354	0.02%	60	139471	0.04%
06020100	11040200	Thyroid Hormones	Other Anti-Inflammatory Eye Preparations (For The Eye)	180	812354	0.02%	145	139471	0.10%
04060000	13020100	Products Used Against Nausea And Vertigo	Emollients	180	812354	0.02%	81	139471	0.06%
05010300	13060102	Tetracyclines	Topical Antibacterials For Acne	180	812354	0.02%	52	139471	0.04%
02040000	03040101	Beta-Adrenoceptor Blockers	Non-Sedating Antihistamines	179	812354	0.02%	128	139471	0.09%
05010201	05010300	Cephalosporins	Tetracyclines	179	812354	0.02%	77	139471	0.06%
03010101	14040200	Selective Beta 2 Agonists	Vaccines And Antisera - Influenza Vaccines	179	812354	0.02%	98	139471	0.07%
01020200	04065400	Other Antispasmodics	Products Used Against Nausea And Vertigo - Antihistamines	178	812354	0.02%	92	139471	0.07%
04020101	04105100	First-Generation Antipsychotic Drugs	Substance Dependence - Nicotine Dependence	178	812354	0.02%	76	139471	0.05%
04030100	05010102	Tricyclic And Related Antidepressants	Penicillinase-Resistant Penicillins	178	812354	0.02%	114	139471	0.08%
05010102	05011300	Penicillinase-Resistant Penicillins	Urinary-Tract Infections	178	812354	0.02%	59	139471	0.04%
04065600	05011300	Products Used Against Nausea And Vertigo - 5 HT3 Antagonists	Urinary-Tract Infections	178	812354	0.02%	77	139471	0.06%
06020100	09010200	Thyroid Hormones	Drugs Used In Megaloblastic Anaemias	178	812354	0.02%	132	139471	0.09%
09060400	09060700	Vitamin D	Multivitamin And Multimineral Preparations	178	812354	0.02%	64	139471	0.05%
03010101	11080100	Selective Beta 2 Agonists	Tear Deficiency	178	812354	0.02%	148	139471	0.11%
01010201	12030100	Compound Alginate Preparations	Drugs For Oral Ulceration And Inflammation	178	812354	0.02%	51	139471	0.04%
04030300	04050100	Selective Serotonin Re-Uptake Inhibitors (SSRI)	Anti-Obesity Products Acting On The Gastro-Intestinal Tract	177	812354	0.02%	141	139471	0.10%
02120400	06010202	Statins	Biguanides (Metformin)	177	812354	0.02%	146	139471	0.10%
04070100	05030201	Non-Opioid And Compound Analgesics	Herpes Simplex And Varicella-Zoster Infection	176	812354	0.02%	68	139471	0.05%
01010101	07020250	Aluminium- And Magnesium- Containing Antacids	Preparations For Vaginal And Vulval Candidiasis	176	812354	0.02%	62	139471	0.04%
09060400	12020101	Vitamin D	Corticosteroids Used In Nasal Allergy	176	812354	0.02%	97	139471	0.07%
04030300	13100300	Selective Serotonin Re-Uptake Inhibitors (SSRI)	Antiviral Preparations (Topical	176	812354	0.02%	132	139471	0.09%
04020000	04030300	Products Used In Psychoses And Related Disorders	Selective Serotonin Re-Uptake Inhibitors (SSRI)	175	812354	0.02%	160	139471	0.11%
04010100	05010800	Hypnotics	Sulphonamides And Trimethoprim	175	812354	0.02%	106	139471	0.08%
04030400	05011300	Other Antidepressants	Urinary-Tract Infections	175	812354	0.02%	146	139471	0.10%
05011300	09060400	Urinary-Tract Infections	Vitamin D	175	812354	0.02%	79	139471	0.06%
13020102	13040200	Emollient Skin Preparations	Mild Topical Corticosteroids	175	812354	0.02%	67	139471	0.05%
02090000	04065500	Antiplatelet Products	Products Used Against Nausea And Vertigo - Domperidone & Metoclopramide	174	812354	0.02%	85	139471	0.06%
02040000	04065500	Beta-Adrenoceptor Blockers	Products Used Against Nausea And Vertigo - Domperidone & Metoclopramide	174	812354	0.02%	118	139471	0.08%
01060400	04070401	Osmotic Laxatives	Acute Migraine	174	812354	0.02%	122	139471	0.09%
04105100	05010800	Substance Dependence - Nicotine Dependence	Sulphonamides And Trimethoprim	174	812354	0.02%	56	139471	0.04%
06010101	09010101	Short-Acting Insulins	Oral Iron	174	812354	0.02%	134	139471	0.10%
04065400	09060400	Products Used Against Nausea And Vertigo - Antihistamines	Vitamin D	174	812354	0.02%	66	139471	0.05%
04065500	13020102	Products Used Against Nausea And Vertigo - Domperidone & Metoclopramide	Emollient Skin Preparations	174	812354	0.02%	94	139471	0.07%
07020250	13060100	Preparations For Vaginal And Vulval Candidiasis	Topical Preparations For Acne	174	812354	0.02%	56	139471	0.04%
03010101	13090000	Selective Beta 2 Agonists	Shampoos And Other Preparations For Scalp And Hair Conditions	174	812354	0.02%	120	139471	0.09%
02090000	04010100	Antiplatelet Products	Hypnotics	173	812354	0.02%	98	139471	0.07%
01020200	04070200	Other Antispasmodics	Opioid Analgesics	173	812354	0.02%	130	139471	0.09%
04070200	05010800	Opioid Analgesics	Sulphonamides And Trimethoprim	173	812354	0.02%	96	139471	0.07%
05011100	05020100	Metronidazole And Tinidazole	Triazole Antifungals	173	812354	0.02%	53	139471	0.04%
03040101	09060400	Non-Sedating Antihistamines	Vitamin D	173	812354	0.02%	112	139471	0.08%
01030500	10030250	Proton Pump Inhibitors	Topical Nsaids And Counter Irritants	173	812354	0.02%	110	139471	0.08%
05010103	13060100	Broad-Spectrum Penicillins	Topical Preparations For Acne	173	812354	0.02%	76	139471	0.05%
01020000	01030500	Antispasmodics And Products Affecting Motility	Proton Pump Inhibitors	172	812354	0.02%	98	139471	0.07%
04010100	04065600	Hypnotics	Products Used Against Nausea And Vertigo - 5 HT3 Antagonists	172	812354	0.02%	79	139471	0.06%
04070200	06020100	Opioid Analgesics	Thyroid Hormones	172	812354	0.02%	150	139471	0.11%
04065500	09020100	Products Used Against Nausea And Vertigo - Domperidone & Metoclopramide	Oral Preparations For Fluid And Electrolyte Imbalance	172	812354	0.02%	53	139471	0.04%
11030100	13020102	Antibacterials (In Eye Preparation)	Emollient Skin Preparations	172	812354	0.02%	85	139471	0.06%
05010800	13020102	Sulphonamides And Trimethoprim	Emollient Skin Preparations	172	812354	0.02%	79	139471	0.06%
04060000	13100101	Products Used Against Nausea And Vertigo	Antibacterial Preparations Only Used Topically	172	812354	0.02%	61	139471	0.04%
04070100	13100200	Non-Opioid And Compound Analgesics	Antifungal Preparations (Topical	172	812354	0.02%	84	139471	0.06%
01030500	04070300	Proton Pump Inhibitors	Neuropathic Pain	171	812354	0.02%	131	139471	0.09%
02090000	05010500	Antiplatelet Products	Macrolides	171	812354	0.02%	96	139471	0.07%
02090000	05010102	Antiplatelet Products	Penicillinase-Resistant Penicillins	170	812354	0.02%	65	139471	0.05%
01070000	05010103	Local Products For Anal Or Rectal Problems	Broad-Spectrum Penicillins	170	812354	0.02%	63	139471	0.05%
01070200	05010201	Compound Haemorrhoid Products With Corticosteroids	Cephalosporins	170	812354	0.02%	60	139471	0.04%
05030201	07020250	Herpes Simplex And Varicella-Zoster Infection	Preparations For Vaginal And Vulval Candidiasis	170	812354	0.02%	63	139471	0.05%
01020200	12020101	Other Antispasmodics	Corticosteroids Used In Nasal Allergy	170	812354	0.02%	128	139471	0.09%
04030300	13100400	Selective Serotonin Re-Uptake Inhibitors (SSRI)	Parasiticidal Preparations (Topical)	170	812354	0.02%	120	139471	0.09%
01010201	01070000	Compound Alginate Preparations	Local Products For Anal Or Rectal Problems	169	812354	0.02%	69	139471	0.05%
04010201	04065500	Benzodiazepines	Products Used Against Nausea And Vertigo - Domperidone & Metoclopramide	169	812354	0.02%	114	139471	0.08%
03010101	04080100	Selective Beta 2 Agonists	Control Of Epilepsy	169	812354	0.02%	155	139471	0.11%
04065500	05010102	Products Used Against Nausea And Vertigo - Domperidone & Metoclopramide	Penicillinase-Resistant Penicillins	169	812354	0.02%	73	139471	0.05%
05010102	05010800	Penicillinase-Resistant Penicillins	Sulphonamides And Trimethoprim	169	812354	0.02%	64	139471	0.05%
02040000	05011300	Beta-Adrenoceptor Blockers	Urinary-Tract Infections	169	812354	0.02%	108	139471	0.08%
03010101	06010101	Selective Beta 2 Agonists	Short-Acting Insulins	169	812354	0.02%	159	139471	0.11%
01060100	06020100	Bulk-Forming Laxatives	Thyroid Hormones	169	812354	0.02%	113	139471	0.08%
05010103	11040100	Broad-Spectrum Penicillins	Corticosteroids (In Eye Preparations)	169	812354	0.02%	72	139471	0.05%
01010201	13040200	Compound Alginate Preparations	Mild Topical Corticosteroids	169	812354	0.02%	75	139471	0.05%
04030300	13040200	Selective Serotonin Re-Uptake Inhibitors (SSRI)	Mild Topical Corticosteroids	169	812354	0.02%	115	139471	0.08%
04030300	13060100	Selective Serotonin Re-Uptake Inhibitors (SSRI)	Topical Preparations For Acne	169	812354	0.02%	131	139471	0.09%
01030100	04010100	H2-Receptor Antagonists	Hypnotics	168	812354	0.02%	95	139471	0.07%
03090100	04070100	Cough Suppressants	Non-Opioid And Compound Analgesics	168	812354	0.02%	60	139471	0.04%
01030100	05011300	H2-Receptor Antagonists	Urinary-Tract Infections	168	812354	0.02%	79	139471	0.06%
01070200	06040103	Compound Haemorrhoid Products With Corticosteroids	Progestogen Products Doubling (In House Use)	168	812354	0.02%	44	139471	0.03%
07020250	09010200	Preparations For Vaginal And Vulval Candidiasis	Drugs Used In Megaloblastic Anaemias	168	812354	0.02%	86	139471	0.06%
04030400	13020102	Other Antidepressants	Emollient Skin Preparations	168	812354	0.02%	139	139471	0.10%
04030100	04070300	Tricyclic And Related Antidepressants	Neuropathic Pain	167	812354	0.02%	125	139471	0.09%
01030500	05010300	Proton Pump Inhibitors	Tetracyclines	167	812354	0.02%	100	139471	0.07%
05010103	09020100	Broad-Spectrum Penicillins	Oral Preparations For Fluid And Electrolyte Imbalance	167	812354	0.02%	64	139471	0.05%
04060000	11030100	Products Used Against Nausea And Vertigo	Antibacterials (In Eye Preparation)	167	812354	0.02%	56	139471	0.04%
01030500	13020100	Proton Pump Inhibitors	Emollients	167	812354	0.02%	110	139471	0.08%
13040000	13050000	Topical Corticosteroids	Preparations For Eczema And Psoriasis	167	812354	0.02%	89	139471	0.06%
01060100	03020000	Bulk-Forming Laxatives	Corticosteroids (For Respiratory Conditions)	166	812354	0.02%	115	139471	0.08%
01060200	04065400	Stimulant Laxatives	Products Used Against Nausea And Vertigo - Antihistamines	166	812354	0.02%	70	139471	0.05%
01060200	04065500	Stimulant Laxatives	Products Used Against Nausea And Vertigo - Domperidone & Metoclopramide	166	812354	0.02%	80	139471	0.06%
04020101	04070401	First-Generation Antipsychotic Drugs	Acute Migraine	166	812354	0.02%	91	139471	0.07%
04030100	04105100	Tricyclic And Related Antidepressants	Substance Dependence - Nicotine Dependence	166	812354	0.02%	110	139471	0.08%
04030400	05010800	Other Antidepressants	Sulphonamides And Trimethoprim	166	812354	0.02%	136	139471	0.10%
05011100	05011200	Metronidazole And Tinidazole	Quinolones	166	812354	0.02%	58	139471	0.04%
04020000	04070100	Products Used In Psychoses And Related Disorders	Non-Opioid And Compound Analgesics	165	812354	0.02%	118	139471	0.08%
04010100	05010102	Hypnotics	Penicillinase-Resistant Penicillins	165	812354	0.02%	98	139471	0.07%
01010201	05010300	Compound Alginate Preparations	Tetracyclines	165	812354	0.02%	93	139471	0.07%
05010800	05020100	Sulphonamides And Trimethoprim	Triazole Antifungals	165	812354	0.02%	66	139471	0.05%
02120400	06010102	Statins	Intermediate- And Long-Acting Insulins	165	812354	0.02%	140	139471	0.10%
06010102	09010101	Intermediate- And Long-Acting Insulins	Oral Iron	165	812354	0.02%	123	139471	0.09%
05010201	09060700	Cephalosporins	Multivitamin And Multimineral Preparations	165	812354	0.02%	62	139471	0.04%
05010102	12010151	Penicillinase-Resistant Penicillins	Anti-Inflammatory Preparations	165	812354	0.02%	63	139471	0.05%
01010201	12010151	Compound Alginate Preparations	Anti-Inflammatory Preparations	165	812354	0.02%	73	139471	0.05%
04105100	12020101	Substance Dependence - Nicotine Dependence	Corticosteroids Used In Nasal Allergy	165	812354	0.02%	85	139471	0.06%
04030100	13020102	Tricyclic And Related Antidepressants	Emollient Skin Preparations	165	812354	0.02%	134	139471	0.10%
01040200	04010100	Antimotility Products	Hypnotics	164	812354	0.02%	114	139471	0.08%
04030400	06020100	Other Antidepressants	Thyroid Hormones	164	812354	0.02%	159	139471	0.11%
04070100	09050101	Non-Opioid And Compound Analgesics	Calcium Supplements	164	812354	0.02%	85	139471	0.06%
05010500	12010151	Macrolides	Anti-Inflammatory Preparations	164	812354	0.02%	66	139471	0.05%
05010500	12030100	Macrolides	Drugs For Oral Ulceration And Inflammation	164	812354	0.02%	51	139471	0.04%
11040200	13020100	Other Anti-Inflammatory Eye Preparations (For The Eye)	Emollients	164	812354	0.02%	90	139471	0.06%
01060100	13020102	Bulk-Forming Laxatives	Emollient Skin Preparations	164	812354	0.02%	79	139471	0.06%
05010201	13060102	Cephalosporins	Topical Antibacterials For Acne	164	812354	0.02%	60	139471	0.04%
04060000	12030100	Products Used Against Nausea And Vertigo	Drugs For Oral Ulceration And Inflammation	163	812354	0.02%	65	139471	0.05%
06010102	13040000	Intermediate- And Long-Acting Insulins	Topical Corticosteroids	163	812354	0.02%	128	139471	0.09%
04070100	13060100	Non-Opioid And Compound Analgesics	Topical Preparations For Acne	163	812354	0.02%	83	139471	0.06%
02050200	02050501	Centrally Acting Antihypertensive Products	Angiotensin-Converting Enzyme Inhibitors (ACE Inhibitors)	162	812354	0.02%	118	139471	0.08%
01060400	04020100	Osmotic Laxatives	Antipsychotic Products	162	812354	0.02%	60	139471	0.04%
01050200	04065400	Corticosteroids In Chronic Bowel Problems	Products Used Against Nausea And Vertigo - Antihistamines	162	812354	0.02%	97	139471	0.07%
04070200	04070401	Opioid Analgesics	Acute Migraine	162	812354	0.02%	125	139471	0.09%
04070401	06040103	Acute Migraine	Progestogen Products Doubling (In House Use)	162	812354	0.02%	81	139471	0.06%
01050200	10010100	Corticosteroids In Chronic Bowel Problems	Non-Steroidal Anti-Inflammatory Drugs	162	812354	0.02%	113	139471	0.08%
04070100	12010300	Non-Opioid And Compound Analgesics	Drugs Acting On The Ear - Removal Of Ear Wax	162	812354	0.02%	50	139471	0.04%
05010103	12020250	Broad-Spectrum Penicillins	Sympathomimetics (Nasal Decongestants)	162	812354	0.02%	49	139471	0.04%
06040103	13060102	Progestogen Products Doubling (In House Use)	Topical Antibacterials For Acne	162	812354	0.02%	39	139471	0.03%
01010201	13100300	Compound Alginate Preparations	Antiviral Preparations (Topical	162	812354	0.02%	74	139471	0.05%
03010101	04020100	Selective Beta 2 Agonists	Antipsychotic Products	161	812354	0.02%	94	139471	0.07%
03010000	05010201	Bronchodilators	Cephalosporins	161	812354	0.02%	85	139471	0.06%
01040200	12020101	Antimotility Products	Corticosteroids Used In Nasal Allergy	161	812354	0.02%	102	139471	0.07%
05010102	13020103	Penicillinase-Resistant Penicillins	Antimicrobial Emollients	161	812354	0.02%	69	139471	0.05%
05010103	14040200	Broad-Spectrum Penicillins	Vaccines And Antisera - Influenza Vaccines	161	812354	0.02%	61	139471	0.04%
05010101	05011100	Benzylpenicillin And Phenoxymethylpenicillin	Metronidazole And Tinidazole	160	812354	0.02%	45	139471	0.03%
03010101	06010102	Selective Beta 2 Agonists	Intermediate- And Long-Acting Insulins	160	812354	0.02%	151	139471	0.11%
01050200	06020100	Corticosteroids In Chronic Bowel Problems	Thyroid Hormones	160	812354	0.02%	124	139471	0.09%
06010101	13040000	Short-Acting Insulins	Topical Corticosteroids	160	812354	0.02%	127	139471	0.09%
14040500	14041100	Vaccines And Antisera - Hepatitis A Vaccine	Vaccines And Antisera - Typhoid Vaccine	160	812354	0.02%	32	139471	0.02%
03020000	03030200	Corticosteroids (For Respiratory Conditions)	Leukotriene Receptor Antagonists	159	812354	0.02%	118	139471	0.08%
03030200	04070100	Leukotriene Receptor Antagonists	Non-Opioid And Compound Analgesics	159	812354	0.02%	133	139471	0.10%
01050200	04070200	Corticosteroids In Chronic Bowel Problems	Opioid Analgesics	159	812354	0.02%	139	139471	0.10%
02050200	05010103	Centrally Acting Antihypertensive Products	Broad-Spectrum Penicillins	159	812354	0.02%	109	139471	0.08%
04010201	05010500	Benzodiazepines	Macrolides	159	812354	0.02%	116	139471	0.08%
04070100	12010100	Non-Opioid And Compound Analgesics	Drugs Acting On The Ear - Otitis Externa	159	812354	0.02%	62	139471	0.04%
13040000	13050202	Topical Corticosteroids	Topical Preparations For Psoriasis	159	812354	0.02%	91	139471	0.07%
04060000	13060102	Products Used Against Nausea And Vertigo	Topical Antibacterials For Acne	159	812354	0.02%	70	139471	0.05%
01020200	01040200	Other Antispasmodics	Antimotility Products	158	812354	0.02%	97	139471	0.07%
01030100	01050200	H2-Receptor Antagonists	Corticosteroids In Chronic Bowel Problems	158	812354	0.02%	115	139471	0.08%
01040200	03020000	Antimotility Products	Corticosteroids (For Respiratory Conditions)	158	812354	0.02%	114	139471	0.08%
06040102	12020101	Progestogens And Progesterone Receptor Modulators	Corticosteroids Used In Nasal Allergy	158	812354	0.02%	89	139471	0.06%
04030400	12020101	Other Antidepressants	Corticosteroids Used In Nasal Allergy	158	812354	0.02%	133	139471	0.10%
01030500	03030200	Proton Pump Inhibitors	Leukotriene Receptor Antagonists	157	812354	0.02%	138	139471	0.10%
01050200	04020101	Corticosteroids In Chronic Bowel Problems	First-Generation Antipsychotic Drugs	157	812354	0.02%	93	139471	0.07%
04065400	05011100	Products Used Against Nausea And Vertigo - Antihistamines	Metronidazole And Tinidazole	157	812354	0.02%	57	139471	0.04%
04030300	05030201	Selective Serotonin Re-Uptake Inhibitors (SSRI)	Herpes Simplex And Varicella-Zoster Infection	157	812354	0.02%	113	139471	0.08%
04020100	09020102	Antipsychotic Products	Oral Sodium And Water	157	812354	0.02%	33	139471	0.02%
10010100	12030100	Non-Steroidal Anti-Inflammatory Drugs	Drugs For Oral Ulceration And Inflammation	157	812354	0.02%	53	139471	0.04%
02090000	04030400	Antiplatelet Products	Other Antidepressants	156	812354	0.02%	133	139471	0.10%
01070000	04070100	Local Products For Anal Or Rectal Problems	Non-Opioid And Compound Analgesics	156	812354	0.02%	68	139471	0.05%
05010103	07020251	Broad-Spectrum Penicillins	Preparations For Other Vaginal Infections	156	812354	0.02%	58	139471	0.04%
04020101	09060400	First-Generation Antipsychotic Drugs	Vitamin D	156	812354	0.02%	49	139471	0.04%
05010201	12030100	Cephalosporins	Drugs For Oral Ulceration And Inflammation	156	812354	0.02%	56	139471	0.04%
04070200	13020102	Opioid Analgesics	Emollient Skin Preparations	156	812354	0.02%	114	139471	0.08%
09060400	13020102	Vitamin D	Emollient Skin Preparations	156	812354	0.02%	82	139471	0.06%
12030100	13040000	Drugs For Oral Ulceration And Inflammation	Topical Corticosteroids	156	812354	0.02%	65	139471	0.05%
10010100	13100101	Non-Steroidal Anti-Inflammatory Drugs	Antibacterial Preparations Only Used Topically	156	812354	0.02%	75	139471	0.05%
04020101	09060200	First-Generation Antipsychotic Drugs	Vitamin B Group	155	812354	0.02%	50	139471	0.04%
05010201	12010151	Cephalosporins	Anti-Inflammatory Preparations	155	812354	0.02%	51	139471	0.04%
12010151	12020101	Anti-Inflammatory Preparations	Corticosteroids Used In Nasal Allergy	155	812354	0.02%	82	139471	0.06%
03010101	71580200	Selective Beta 2 Agonists	Emollient Ointment	155	812354	0.02%	118	139471	0.08%
01010101	01060400	Aluminium- And Magnesium- Containing Antacids	Osmotic Laxatives	154	812354	0.02%	41	139471	0.03%
01030100	02040000	H2-Receptor Antagonists	Beta-Adrenoceptor Blockers	154	812354	0.02%	117	139471	0.08%
04065400	04070401	Products Used Against Nausea And Vertigo - Antihistamines	Acute Migraine	154	812354	0.02%	90	139471	0.06%
04030400	04105100	Other Antidepressants	Substance Dependence - Nicotine Dependence	154	812354	0.02%	119	139471	0.09%
04010201	04105100	Benzodiazepines	Substance Dependence - Nicotine Dependence	154	812354	0.02%	114	139471	0.08%
05011200	07020250	Quinolones	Preparations For Vaginal And Vulval Candidiasis	154	812354	0.02%	59	139471	0.04%
03040102	13020103	Sedating Antihistamines	Antimicrobial Emollients	154	812354	0.02%	87	139471	0.06%
09010101	13060102	Oral Iron	Topical Antibacterials For Acne	154	812354	0.02%	55	139471	0.04%
01030100	03020000	H2-Receptor Antagonists	Corticosteroids (For Respiratory Conditions)	153	812354	0.02%	105	139471	0.08%
01070200	04060000	Compound Haemorrhoid Products With Corticosteroids	Products Used Against Nausea And Vertigo	153	812354	0.02%	57	139471	0.04%
01060100	04065500	Bulk-Forming Laxatives	Products Used Against Nausea And Vertigo - Domperidone & Metoclopramide	153	812354	0.02%	71	139471	0.05%
03040101	04070401	Non-Sedating Antihistamines	Acute Migraine	153	812354	0.02%	111	139471	0.08%
05010800	05011100	Sulphonamides And Trimethoprim	Metronidazole And Tinidazole	153	812354	0.02%	55	139471	0.04%
07020250	09020102	Preparations For Vaginal And Vulval Candidiasis	Oral Sodium And Water	153	812354	0.02%	50	139471	0.04%
03020000	11030100	Corticosteroids (For Respiratory Conditions)	Antibacterials (In Eye Preparation)	153	812354	0.02%	77	139471	0.06%
04030000	04030400	Antidepressants	Other Antidepressants	152	812354	0.02%	135	139471	0.10%
01040200	05011300	Antimotility Products	Urinary-Tract Infections	152	812354	0.02%	92	139471	0.07%
01060400	05020100	Osmotic Laxatives	Triazole Antifungals	152	812354	0.02%	71	139471	0.05%
09010101	10030250	Oral Iron	Topical Nsaids And Counter Irritants	152	812354	0.02%	50	139471	0.04%
03010000	13020102	Bronchodilators	Emollient Skin Preparations	152	812354	0.02%	111	139471	0.08%
03100000	04070100	Systemic Nasal Decongestants	Non-Opioid And Compound Analgesics	151	812354	0.02%	59	139471	0.04%
02110000	04070100	Antifibrinolytic Products And Haemostatics	Non-Opioid And Compound Analgesics	151	812354	0.02%	75	139471	0.05%
04065500	04070401	Products Used Against Nausea And Vertigo - Domperidone & Metoclopramide	Acute Migraine	151	812354	0.02%	81	139471	0.06%
02090000	04105100	Antiplatelet Products	Substance Dependence - Nicotine Dependence	151	812354	0.02%	62	139471	0.04%
02120400	06010101	Statins	Short-Acting Insulins	151	812354	0.02%	131	139471	0.09%
01060400	06010202	Osmotic Laxatives	Biguanides (Metformin)	151	812354	0.02%	110	139471	0.08%
01030100	06040103	H2-Receptor Antagonists	Progestogen Products Doubling (In House Use)	151	812354	0.02%	53	139471	0.04%
04065500	09060200	Products Used Against Nausea And Vertigo - Domperidone & Metoclopramide	Vitamin B Group	151	812354	0.02%	43	139471	0.03%
02040000	12020101	Beta-Adrenoceptor Blockers	Corticosteroids Used In Nasal Allergy	151	812354	0.02%	107	139471	0.08%
01060200	04030100	Stimulant Laxatives	Tricyclic And Related Antidepressants	150	812354	0.02%	120	139471	0.09%
04020102	04060000	Second-Generation Antipsychotic Drugs	Products Used Against Nausea And Vertigo	150	812354	0.02%	141	139471	0.10%
02050501	04070100	Angiotensin-Converting Enzyme Inhibitors (ACE Inhibitors)	Non-Opioid And Compound Analgesics	150	812354	0.02%	132	139471	0.09%
04030300	04070402	Selective Serotonin Re-Uptake Inhibitors (SSRI)	Prophylaxis Of Migraine	150	812354	0.02%	136	139471	0.10%
04070200	05011300	Opioid Analgesics	Urinary-Tract Infections	150	812354	0.02%	94	139471	0.07%
03010000	06040103	Bronchodilators	Progestogen Products Doubling (In House Use)	150	812354	0.02%	66	139471	0.05%
04070100	09020100	Non-Opioid And Compound Analgesics	Oral Preparations For Fluid And Electrolyte Imbalance	150	812354	0.02%	66	139471	0.05%
05010103	11080100	Broad-Spectrum Penicillins	Tear Deficiency	150	812354	0.02%	81	139471	0.06%
06020100	13020100	Thyroid Hormones	Emollients	150	812354	0.02%	102	139471	0.07%
09010200	13040000	Drugs Used In Megaloblastic Anaemias	Topical Corticosteroids	150	812354	0.02%	87	139471	0.06%
02020100	02040000	Thiazides And Related Diuretics	Beta-Adrenoceptor Blockers	149	812354	0.02%	91	139471	0.07%
02090000	05010800	Antiplatelet Products	Sulphonamides And Trimethoprim	149	812354	0.02%	73	139471	0.05%
04070100	15020000	Non-Opioid And Compound Analgesics	Local Anaesthesia	149	812354	0.02%	83	139471	0.06%
01020200	03020000	Other Antispasmodics	Corticosteroids (For Respiratory Conditions)	148	812354	0.02%	106	139471	0.08%
01020200	04030400	Other Antispasmodics	Other Antidepressants	148	812354	0.02%	140	139471	0.10%
01060200	04065600	Stimulant Laxatives	Products Used Against Nausea And Vertigo - 5 HT3 Antagonists	148	812354	0.02%	69	139471	0.05%
03040102	05010101	Sedating Antihistamines	Benzylpenicillin And Phenoxymethylpenicillin	148	812354	0.02%	53	139471	0.04%
04010100	05010101	Hypnotics	Benzylpenicillin And Phenoxymethylpenicillin	148	812354	0.02%	69	139471	0.05%
01060100	05010500	Bulk-Forming Laxatives	Macrolides	148	812354	0.02%	60	139471	0.04%
04020101	05011100	First-Generation Antipsychotic Drugs	Metronidazole And Tinidazole	148	812354	0.02%	50	139471	0.04%
04020102	07020250	Second-Generation Antipsychotic Drugs	Preparations For Vaginal And Vulval Candidiasis	148	812354	0.02%	132	139471	0.09%
01070200	10010100	Compound Haemorrhoid Products With Corticosteroids	Non-Steroidal Anti-Inflammatory Drugs	148	812354	0.02%	67	139471	0.05%
01060400	13090000	Osmotic Laxatives	Shampoos And Other Preparations For Scalp And Hair Conditions	148	812354	0.02%	79	139471	0.06%
02080100	03010101	Parenteral Anticoagulants	Selective Beta 2 Agonists	147	812354	0.02%	108	139471	0.08%
04020102	04030100	Second-Generation Antipsychotic Drugs	Tricyclic And Related Antidepressants	147	812354	0.02%	141	139471	0.10%
02050200	04070100	Centrally Acting Antihypertensive Products	Non-Opioid And Compound Analgesics	147	812354	0.02%	114	139471	0.08%
03020000	05010300	Corticosteroids (For Respiratory Conditions)	Tetracyclines	147	812354	0.02%	91	139471	0.07%
10030250	13040000	Topical Nsaids And Counter Irritants	Topical Corticosteroids	147	812354	0.02%	70	139471	0.05%
07020250	13100400	Preparations For Vaginal And Vulval Candidiasis	Parasiticidal Preparations (Topical)	147	812354	0.02%	40	139471	0.03%
01040200	03040101	Antimotility Products	Non-Sedating Antihistamines	146	812354	0.02%	108	139471	0.08%
04020101	04020102	First-Generation Antipsychotic Drugs	Second-Generation Antipsychotic Drugs	146	812354	0.02%	136	139471	0.10%
05010201	05011200	Cephalosporins	Quinolones	146	812354	0.02%	62	139471	0.04%
03040101	06010202	Non-Sedating Antihistamines	Biguanides (Metformin)	146	812354	0.02%	120	139471	0.09%
03020000	06040102	Corticosteroids (For Respiratory Conditions)	Progestogens And Progesterone Receptor Modulators	146	812354	0.02%	93	139471	0.07%
06040102	06040104	Progestogens And Progesterone Receptor Modulators	Selective Estrogen Receptor Modulators (Serms)	146	812354	0.02%	55	139471	0.04%
01060400	09010200	Osmotic Laxatives	Drugs Used In Megaloblastic Anaemias	146	812354	0.02%	81	139471	0.06%
05010103	09050101	Broad-Spectrum Penicillins	Calcium Supplements	146	812354	0.02%	61	139471	0.04%
03020000	09060400	Corticosteroids (For Respiratory Conditions)	Vitamin D	146	812354	0.02%	117	139471	0.08%
01020200	01060200	Other Antispasmodics	Stimulant Laxatives	145	812354	0.02%	87	139471	0.06%
01030100	03040102	H2-Receptor Antagonists	Sedating Antihistamines	145	812354	0.02%	69	139471	0.05%
03040102	04030100	Sedating Antihistamines	Tricyclic And Related Antidepressants	145	812354	0.02%	110	139471	0.08%
03030200	04030300	Leukotriene Receptor Antagonists	Selective Serotonin Re-Uptake Inhibitors (SSRI)	145	812354	0.02%	139	139471	0.10%
02080100	06020100	Parenteral Anticoagulants	Thyroid Hormones	145	812354	0.02%	105	139471	0.08%
05010300	09010101	Tetracyclines	Oral Iron	145	812354	0.02%	52	139471	0.04%
01030100	04030100	H2-Receptor Antagonists	Tricyclic And Related Antidepressants	144	812354	0.02%	110	139471	0.08%
04030400	05010102	Other Antidepressants	Penicillinase-Resistant Penicillins	144	812354	0.02%	124	139471	0.09%
01030500	06040102	Proton Pump Inhibitors	Progestogens And Progesterone Receptor Modulators	144	812354	0.02%	93	139471	0.07%
04065500	09060400	Products Used Against Nausea And Vertigo - Domperidone & Metoclopramide	Vitamin D	144	812354	0.02%	70	139471	0.05%
09010101	12030100	Oral Iron	Drugs For Oral Ulceration And Inflammation	144	812354	0.02%	40	139471	0.03%
06040103	13020101	Progestogen Products Doubling (In House Use)	Emollient Bath Additives And Shower Preparations	144	812354	0.02%	61	139471	0.04%
05010201	13040200	Cephalosporins	Mild Topical Corticosteroids	144	812354	0.02%	53	139471	0.04%
01010201	03090200	Compound Alginate Preparations	Demulcent And Expectorant Cough Preparations	143	812354	0.02%	49	139471	0.04%
03010101	04065600	Selective Beta 2 Agonists	Products Used Against Nausea And Vertigo - 5 HT3 Antagonists	143	812354	0.02%	96	139471	0.07%
01030100	06020100	H2-Receptor Antagonists	Thyroid Hormones	143	812354	0.02%	116	139471	0.08%
04065600	07020250	Products Used Against Nausea And Vertigo - 5 HT3 Antagonists	Preparations For Vaginal And Vulval Candidiasis	143	812354	0.02%	62	139471	0.04%
04030300	09060200	Selective Serotonin Re-Uptake Inhibitors (SSRI)	Vitamin B Group	143	812354	0.02%	120	139471	0.09%
05010500	13020100	Macrolides	Emollients	143	812354	0.02%	71	139471	0.05%
03040101	13060102	Non-Sedating Antihistamines	Topical Antibacterials For Acne	143	812354	0.02%	67	139471	0.05%
01010000	01010201	Indigestion And GORD (Gastro-Oesophageal Reflux Disease)	Compound Alginate Preparations	142	812354	0.02%	49	139471	0.04%
04020000	05010103	Products Used In Psychoses And Related Disorders	Broad-Spectrum Penicillins	142	812354	0.02%	102	139471	0.07%
05010103	13030000	Broad-Spectrum Penicillins	Topical Local Anaesthetics And Antipruritics	142	812354	0.02%	63	139471	0.05%
01060100	04105100	Bulk-Forming Laxatives	Substance Dependence - Nicotine Dependence	141	812354	0.02%	50	139471	0.04%
01010201	09010200	Compound Alginate Preparations	Drugs Used In Megaloblastic Anaemias	141	812354	0.02%	75	139471	0.05%
05010103	12020300	Broad-Spectrum Penicillins	Nasal Preparations For Infection	141	812354	0.02%	58	139471	0.04%
13020100	13020103	Emollients	Antimicrobial Emollients	141	812354	0.02%	75	139471	0.05%
13020102	13040100	Emollient Skin Preparations	Topical Corticosteroids With Antimicrobials	141	812354	0.02%	55	139471	0.04%
03040101	13100101	Non-Sedating Antihistamines	Antibacterial Preparations Only Used Topically	141	812354	0.02%	61	139471	0.04%
03020000	13100101	Corticosteroids (For Respiratory Conditions)	Antibacterial Preparations Only Used Topically	141	812354	0.02%	70	139471	0.05%
12020101	13100101	Corticosteroids Used In Nasal Allergy	Antibacterial Preparations Only Used Topically	141	812354	0.02%	76	139471	0.05%
01050200	04065500	Corticosteroids In Chronic Bowel Problems	Products Used Against Nausea And Vertigo - Domperidone & Metoclopramide	140	812354	0.02%	86	139471	0.06%
01050200	05010300	Corticosteroids In Chronic Bowel Problems	Tetracyclines	140	812354	0.02%	94	139471	0.07%
04010201	12020101	Benzodiazepines	Corticosteroids Used In Nasal Allergy	140	812354	0.02%	111	139471	0.08%
05010201	13020101	Cephalosporins	Emollient Bath Additives And Shower Preparations	140	812354	0.02%	68	139471	0.05%
03010101	13090100	Selective Beta 2 Agonists	Shampoos And Other Scalp Preparations	140	812354	0.02%	107	139471	0.08%
02060200	02090000	Calcium-Channel Blockers	Antiplatelet Products	139	812354	0.02%	105	139471	0.08%
01060100	04030100	Bulk-Forming Laxatives	Tricyclic And Related Antidepressants	139	812354	0.02%	96	139471	0.07%
04065600	05010201	Products Used Against Nausea And Vertigo - 5 HT3 Antagonists	Cephalosporins	139	812354	0.02%	55	139471	0.04%
01020200	05010800	Other Antispasmodics	Sulphonamides And Trimethoprim	139	812354	0.02%	66	139471	0.05%
06020100	09050101	Thyroid Hormones	Calcium Supplements	139	812354	0.02%	96	139471	0.07%
01030500	13020101	Proton Pump Inhibitors	Emollient Bath Additives And Shower Preparations	139	812354	0.02%	99	139471	0.07%
12020101	13060102	Corticosteroids Used In Nasal Allergy	Topical Antibacterials For Acne	139	812354	0.02%	64	139471	0.05%
01020100	01030500	Antimuscarinics	Proton Pump Inhibitors	138	812354	0.02%	76	139471	0.05%
02040000	05010500	Beta-Adrenoceptor Blockers	Macrolides	138	812354	0.02%	79	139471	0.06%
04105100	05011100	Substance Dependence - Nicotine Dependence	Metronidazole And Tinidazole	138	812354	0.02%	53	139471	0.04%
01020200	06020100	Other Antispasmodics	Thyroid Hormones	138	812354	0.02%	113	139471	0.08%
04070401	09010101	Acute Migraine	Oral Iron	138	812354	0.02%	70	139471	0.05%
01020200	01030100	Other Antispasmodics	H2-Receptor Antagonists	137	812354	0.02%	75	139471	0.05%
01060200	01070200	Stimulant Laxatives	Compound Haemorrhoid Products With Corticosteroids	137	812354	0.02%	59	139471	0.04%
02080100	04030300	Parenteral Anticoagulants	Selective Serotonin Re-Uptake Inhibitors (SSRI)	137	812354	0.02%	114	139471	0.08%
01040200	05010500	Antimotility Products	Macrolides	137	812354	0.02%	81	139471	0.06%
04060000	05020100	Products Used Against Nausea And Vertigo	Triazole Antifungals	137	812354	0.02%	64	139471	0.05%
02040000	06010202	Beta-Adrenoceptor Blockers	Biguanides (Metformin)	137	812354	0.02%	124	139471	0.09%
01010201	09020100	Compound Alginate Preparations	Oral Preparations For Fluid And Electrolyte Imbalance	137	812354	0.02%	38	139471	0.03%
06010202	10010100	Biguanides (Metformin)	Non-Steroidal Anti-Inflammatory Drugs	137	812354	0.02%	106	139471	0.08%
05010500	13020101	Macrolides	Emollient Bath Additives And Shower Preparations	137	812354	0.02%	82	139471	0.06%
13040000	13040400	Topical Corticosteroids	Potent Topical Corticosteroids	137	812354	0.02%	67	139471	0.05%
01030500	01070200	Proton Pump Inhibitors	Compound Haemorrhoid Products With Corticosteroids	136	812354	0.02%	79	139471	0.06%
01060200	04010100	Stimulant Laxatives	Hypnotics	136	812354	0.02%	83	139471	0.06%
01030100	05010500	H2-Receptor Antagonists	Macrolides	136	812354	0.02%	65	139471	0.05%
01020200	05011300	Other Antispasmodics	Urinary-Tract Infections	136	812354	0.02%	73	139471	0.05%
04105100	06020100	Substance Dependence - Nicotine Dependence	Thyroid Hormones	136	812354	0.02%	91	139471	0.07%
01060400	12010151	Osmotic Laxatives	Anti-Inflammatory Preparations	136	812354	0.02%	67	139471	0.05%
01010201	13020103	Compound Alginate Preparations	Antimicrobial Emollients	136	812354	0.02%	66	139471	0.05%
03040102	04070200	Sedating Antihistamines	Opioid Analgesics	135	812354	0.02%	96	139471	0.07%
04020101	11030100	First-Generation Antipsychotic Drugs	Antibacterials (In Eye Preparation)	135	812354	0.02%	59	139471	0.04%
04010100	13020100	Hypnotics	Emollients	135	812354	0.02%	96	139471	0.07%
04020101	13020100	First-Generation Antipsychotic Drugs	Emollients	135	812354	0.02%	54	139471	0.04%
01060200	03040101	Stimulant Laxatives	Non-Sedating Antihistamines	134	812354	0.02%	93	139471	0.07%
01070000	09010101	Local Products For Anal Or Rectal Problems	Oral Iron	134	812354	0.02%	39	139471	0.03%
02110000	09010101	Antifibrinolytic Products And Haemostatics	Oral Iron	134	812354	0.02%	50	139471	0.04%
06020100	11030100	Thyroid Hormones	Antibacterials (In Eye Preparation)	134	812354	0.02%	79	139471	0.06%
01060400	13020103	Osmotic Laxatives	Antimicrobial Emollients	134	812354	0.02%	65	139471	0.05%
01010101	01030500	Aluminium- And Magnesium- Containing Antacids	Proton Pump Inhibitors	133	812354	0.02%	54	139471	0.04%
03040102	04105100	Sedating Antihistamines	Substance Dependence - Nicotine Dependence	133	812354	0.02%	52	139471	0.04%
04030400	05010500	Other Antidepressants	Macrolides	133	812354	0.02%	115	139471	0.08%
03010000	05010500	Bronchodilators	Macrolides	133	812354	0.02%	81	139471	0.06%
04010201	05011300	Benzodiazepines	Urinary-Tract Infections	133	812354	0.02%	102	139471	0.07%
03010101	13060100	Selective Beta 2 Agonists	Topical Preparations For Acne	133	812354	0.02%	80	139471	0.06%
05010103	13090100	Broad-Spectrum Penicillins	Shampoos And Other Scalp Preparations	133	812354	0.02%	63	139471	0.05%
04010100	04020100	Hypnotics	Antipsychotic Products	132	812354	0.02%	56	139471	0.04%
01050200	04030100	Corticosteroids In Chronic Bowel Problems	Tricyclic And Related Antidepressants	132	812354	0.02%	107	139471	0.08%
02060200	04070100	Calcium-Channel Blockers	Non-Opioid And Compound Analgesics	132	812354	0.02%	105	139471	0.08%
04050100	05010103	Anti-Obesity Products Acting On The Gastro-Intestinal Tract	Broad-Spectrum Penicillins	132	812354	0.02%	74	139471	0.05%
06010201	06010202	Sulphonylureas	Biguanides (Metformin)	132	812354	0.02%	86	139471	0.06%
01010201	09050101	Compound Alginate Preparations	Calcium Supplements	132	812354	0.02%	58	139471	0.04%
04065400	11040200	Products Used Against Nausea And Vertigo - Antihistamines	Other Anti-Inflammatory Eye Preparations (For The Eye)	132	812354	0.02%	65	139471	0.05%
05030201	13040000	Herpes Simplex And Varicella-Zoster Infection	Topical Corticosteroids	132	812354	0.02%	59	139471	0.04%
13020101	13090000	Emollient Bath Additives And Shower Preparations	Shampoos And Other Preparations For Scalp And Hair Conditions	132	812354	0.02%	76	139471	0.05%
03040101	13100400	Non-Sedating Antihistamines	Parasiticidal Preparations (Topical)	132	812354	0.02%	32	139471	0.02%
01060400	04020102	Osmotic Laxatives	Second-Generation Antipsychotic Drugs	131	812354	0.02%	122	139471	0.09%
04030100	05010101	Tricyclic And Related Antidepressants	Benzylpenicillin And Phenoxymethylpenicillin	131	812354	0.02%	84	139471	0.06%
03010000	09010101	Bronchodilators	Oral Iron	131	812354	0.02%	64	139471	0.05%
05020100	09010101	Triazole Antifungals	Oral Iron	131	812354	0.02%	37	139471	0.03%
03010101	13100200	Selective Beta 2 Agonists	Antifungal Preparations (Topical	131	812354	0.02%	74	139471	0.05%
02050501	02090000	Angiotensin-Converting Enzyme Inhibitors (ACE Inhibitors)	Antiplatelet Products	130	812354	0.02%	103	139471	0.07%
05010102	05010300	Penicillinase-Resistant Penicillins	Tetracyclines	130	812354	0.02%	60	139471	0.04%
01020200	05010500	Other Antispasmodics	Macrolides	130	812354	0.02%	70	139471	0.05%
04065400	06040102	Products Used Against Nausea And Vertigo - Antihistamines	Progestogens And Progesterone Receptor Modulators	130	812354	0.02%	56	139471	0.04%
01060400	10030250	Osmotic Laxatives	Topical Nsaids And Counter Irritants	130	812354	0.02%	51	139471	0.04%
04065400	13020100	Products Used Against Nausea And Vertigo - Antihistamines	Emollients	130	812354	0.02%	65	139471	0.05%
10010100	13020101	Non-Steroidal Anti-Inflammatory Drugs	Emollient Bath Additives And Shower Preparations	130	812354	0.02%	75	139471	0.05%
03010101	13040200	Selective Beta 2 Agonists	Mild Topical Corticosteroids	130	812354	0.02%	80	139471	0.06%
03040101	13090000	Non-Sedating Antihistamines	Shampoos And Other Preparations For Scalp And Hair Conditions	130	812354	0.02%	72	139471	0.05%
05030201	13100300	Herpes Simplex And Varicella-Zoster Infection	Antiviral Preparations (Topical	130	812354	0.02%	44	139471	0.03%
01030500	01050100	Proton Pump Inhibitors	Aminosalicylates	129	812354	0.02%	96	139471	0.07%
01020200	04010100	Other Antispasmodics	Hypnotics	129	812354	0.02%	88	139471	0.06%
01030500	04030000	Proton Pump Inhibitors	Antidepressants	129	812354	0.02%	115	139471	0.08%
01020100	05010103	Antimuscarinics	Broad-Spectrum Penicillins	129	812354	0.02%	61	139471	0.04%
04065400	05010300	Products Used Against Nausea And Vertigo - Antihistamines	Tetracyclines	129	812354	0.02%	67	139471	0.05%
01010201	06010102	Compound Alginate Preparations	Intermediate- And Long-Acting Insulins	129	812354	0.02%	99	139471	0.07%
04030300	07020251	Selective Serotonin Re-Uptake Inhibitors (SSRI)	Preparations For Other Vaginal Infections	129	812354	0.02%	84	139471	0.06%
05010201	09020102	Cephalosporins	Oral Sodium And Water	129	812354	0.02%	32	139471	0.02%
04070100	10020202	Non-Opioid And Compound Analgesics	Other Muscle Relaxants	129	812354	0.02%	59	139471	0.04%
11080100	13040000	Tear Deficiency	Topical Corticosteroids	129	812354	0.02%	69	139471	0.05%
02090000	04070401	Antiplatelet Products	Acute Migraine	128	812354	0.02%	83	139471	0.06%
01040200	05010800	Antimotility Products	Sulphonamides And Trimethoprim	128	812354	0.02%	66	139471	0.05%
03040102	05010800	Sedating Antihistamines	Sulphonamides And Trimethoprim	128	812354	0.02%	53	139471	0.04%
06040102	06040103	Progestogens And Progesterone Receptor Modulators	Progestogen Products Doubling (In House Use)	128	812354	0.02%	42	139471	0.03%
06040102	10010100	Progestogens And Progesterone Receptor Modulators	Non-Steroidal Anti-Inflammatory Drugs	128	812354	0.02%	55	139471	0.04%
04070401	12020101	Acute Migraine	Corticosteroids Used In Nasal Allergy	128	812354	0.02%	96	139471	0.07%
13020102	13030000	Emollient Skin Preparations	Topical Local Anaesthetics And Antipruritics	128	812354	0.02%	40	139471	0.03%
13020100	13090000	Emollients	Shampoos And Other Preparations For Scalp And Hair Conditions	128	812354	0.02%	57	139471	0.04%
02090000	02120400	Antiplatelet Products	Statins	127	812354	0.02%	107	139471	0.08%
03010101	03090200	Selective Beta 2 Agonists	Demulcent And Expectorant Cough Preparations	127	812354	0.02%	58	139471	0.04%
01020000	05010103	Antispasmodics And Products Affecting Motility	Broad-Spectrum Penicillins	127	812354	0.02%	66	139471	0.05%
04065400	11030100	Products Used Against Nausea And Vertigo - Antihistamines	Antibacterials (In Eye Preparation)	127	812354	0.02%	47	139471	0.03%
05010500	11040200	Macrolides	Other Anti-Inflammatory Eye Preparations (For The Eye)	127	812354	0.02%	60	139471	0.04%
11040200	12020151	Other Anti-Inflammatory Eye Preparations (For The Eye)	Cromoglicate In Nasal Allergy	127	812354	0.02%	38	139471	0.03%
06040102	13020102	Progestogens And Progesterone Receptor Modulators	Emollient Skin Preparations	127	812354	0.02%	61	139471	0.04%
13020101	13050200	Emollient Bath Additives And Shower Preparations	Preparations For Psoriasis	127	812354	0.02%	55	139471	0.04%
07020250	13090100	Preparations For Vaginal And Vulval Candidiasis	Shampoos And Other Scalp Preparations	127	812354	0.02%	71	139471	0.05%
04030000	04030100	Antidepressants	Tricyclic And Related Antidepressants	126	812354	0.02%	106	139471	0.08%
02040000	05010102	Beta-Adrenoceptor Blockers	Penicillinase-Resistant Penicillins	126	812354	0.02%	79	139471	0.06%
01040200	05010102	Antimotility Products	Penicillinase-Resistant Penicillins	126	812354	0.02%	68	139471	0.05%
01050100	05010103	Aminosalicylates	Broad-Spectrum Penicillins	126	812354	0.02%	83	139471	0.06%
05011100	05011300	Metronidazole And Tinidazole	Urinary-Tract Infections	126	812354	0.02%	53	139471	0.04%
05010201	06010102	Cephalosporins	Intermediate- And Long-Acting Insulins	126	812354	0.02%	98	139471	0.07%
04020101	06040102	First-Generation Antipsychotic Drugs	Progestogens And Progesterone Receptor Modulators	126	812354	0.02%	53	139471	0.04%
03010101	09050101	Selective Beta 2 Agonists	Calcium Supplements	126	812354	0.02%	103	139471	0.07%
04070100	14040200	Non-Opioid And Compound Analgesics	Vaccines And Antisera - Influenza Vaccines	126	812354	0.02%	61	139471	0.04%
01060100	02090000	Bulk-Forming Laxatives	Antiplatelet Products	125	812354	0.02%	64	139471	0.05%
01060200	06040103	Stimulant Laxatives	Progestogen Products Doubling (In House Use)	125	812354	0.02%	59	139471	0.04%
09060400	10010100	Vitamin D	Non-Steroidal Anti-Inflammatory Drugs	125	812354	0.02%	74	139471	0.05%
12020101	12500200	Corticosteroids Used In Nasal Allergy	Nasal Spray	125	812354	0.02%	62	139471	0.04%
11040200	13020101	Other Anti-Inflammatory Eye Preparations (For The Eye)	Emollient Bath Additives And Shower Preparations	125	812354	0.02%	85	139471	0.06%
01030100	13020102	H2-Receptor Antagonists	Emollient Skin Preparations	125	812354	0.02%	71	139471	0.05%
07020250	13030000	Preparations For Vaginal And Vulval Candidiasis	Topical Local Anaesthetics And Antipruritics	125	812354	0.02%	47	139471	0.03%
01030500	13100101	Proton Pump Inhibitors	Antibacterial Preparations Only Used Topically	125	812354	0.02%	80	139471	0.06%
03040102	04030400	Sedating Antihistamines	Other Antidepressants	124	812354	0.02%	101	139471	0.07%
03010101	04070300	Selective Beta 2 Agonists	Neuropathic Pain	124	812354	0.02%	114	139471	0.08%
04020100	09010101	Antipsychotic Products	Oral Iron	124	812354	0.02%	32	139471	0.02%
05020100	10010100	Triazole Antifungals	Non-Steroidal Anti-Inflammatory Drugs	124	812354	0.02%	53	139471	0.04%
10010100	12010151	Non-Steroidal Anti-Inflammatory Drugs	Anti-Inflammatory Preparations	124	812354	0.02%	40	139471	0.03%
04060000	13020101	Products Used Against Nausea And Vertigo	Emollient Bath Additives And Shower Preparations	124	812354	0.02%	73	139471	0.05%
04010201	13020102	Benzodiazepines	Emollient Skin Preparations	124	812354	0.02%	96	139471	0.07%
09010101	13090000	Oral Iron	Shampoos And Other Preparations For Scalp And Hair Conditions	124	812354	0.02%	49	139471	0.04%
05010103	15020000	Broad-Spectrum Penicillins	Local Anaesthesia	124	812354	0.02%	39	139471	0.03%
02050501	02060200	Angiotensin-Converting Enzyme Inhibitors (ACE Inhibitors)	Calcium-Channel Blockers	123	812354	0.02%	84	139471	0.06%
01070000	04030300	Local Products For Anal Or Rectal Problems	Selective Serotonin Re-Uptake Inhibitors (SSRI)	123	812354	0.02%	87	139471	0.06%
01030100	04030400	H2-Receptor Antagonists	Other Antidepressants	123	812354	0.02%	111	139471	0.08%
02040000	04105100	Beta-Adrenoceptor Blockers	Substance Dependence - Nicotine Dependence	123	812354	0.02%	80	139471	0.06%
04070200	05010300	Opioid Analgesics	Tetracyclines	123	812354	0.02%	81	139471	0.06%
01060100	05011300	Bulk-Forming Laxatives	Urinary-Tract Infections	123	812354	0.02%	57	139471	0.04%
01030500	06010102	Proton Pump Inhibitors	Intermediate- And Long-Acting Insulins	123	812354	0.02%	112	139471	0.08%
01040200	06020100	Antimotility Products	Thyroid Hormones	123	812354	0.02%	98	139471	0.07%
01010101	09010101	Aluminium- And Magnesium- Containing Antacids	Oral Iron	123	812354	0.02%	22	139471	0.02%
04060000	12010151	Products Used Against Nausea And Vertigo	Anti-Inflammatory Preparations	123	812354	0.02%	53	139471	0.04%
10010100	13060102	Non-Steroidal Anti-Inflammatory Drugs	Topical Antibacterials For Acne	123	812354	0.02%	42	139471	0.03%
13020101	13090100	Emollient Bath Additives And Shower Preparations	Shampoos And Other Scalp Preparations	123	812354	0.02%	65	139471	0.05%
04030300	13090100	Selective Serotonin Re-Uptake Inhibitors (SSRI)	Shampoos And Other Scalp Preparations	123	812354	0.02%	103	139471	0.07%
03010101	04020000	Selective Beta 2 Agonists	Products Used In Psychoses And Related Disorders	122	812354	0.02%	109	139471	0.08%
01010101	04060000	Aluminium- And Magnesium- Containing Antacids	Products Used Against Nausea And Vertigo	122	812354	0.02%	26	139471	0.02%
02120400	04070100	Statins	Non-Opioid And Compound Analgesics	122	812354	0.02%	104	139471	0.07%
04065500	04105100	Products Used Against Nausea And Vertigo - Domperidone & Metoclopramide	Substance Dependence - Nicotine Dependence	122	812354	0.02%	51	139471	0.04%
04070200	05010101	Opioid Analgesics	Benzylpenicillin And Phenoxymethylpenicillin	122	812354	0.02%	68	139471	0.05%
01060200	05011300	Stimulant Laxatives	Urinary-Tract Infections	122	812354	0.02%	65	139471	0.05%
05011300	06040102	Urinary-Tract Infections	Progestogens And Progesterone Receptor Modulators	122	812354	0.02%	54	139471	0.04%
06010202	12020101	Biguanides (Metformin)	Corticosteroids Used In Nasal Allergy	122	812354	0.02%	103	139471	0.07%
06020100	13020101	Thyroid Hormones	Emollient Bath Additives And Shower Preparations	122	812354	0.02%	83	139471	0.06%
13020102	13060102	Emollient Skin Preparations	Topical Antibacterials For Acne	122	812354	0.02%	51	139471	0.04%
01010201	02080100	Compound Alginate Preparations	Parenteral Anticoagulants	121	812354	0.01%	73	139471	0.05%
01060200	04030400	Stimulant Laxatives	Other Antidepressants	121	812354	0.01%	104	139471	0.07%
01050200	05010102	Corticosteroids In Chronic Bowel Problems	Penicillinase-Resistant Penicillins	121	812354	0.01%	70	139471	0.05%
02110000	05010103	Antifibrinolytic Products And Haemostatics	Broad-Spectrum Penicillins	121	812354	0.01%	61	139471	0.04%
04070200	10030250	Opioid Analgesics	Topical Nsaids And Counter Irritants	121	812354	0.01%	83	139471	0.06%
01050200	11040200	Corticosteroids In Chronic Bowel Problems	Other Anti-Inflammatory Eye Preparations (For The Eye)	121	812354	0.01%	83	139471	0.06%
04030300	11080100	Selective Serotonin Re-Uptake Inhibitors (SSRI)	Tear Deficiency	121	812354	0.01%	97	139471	0.07%
02040000	13020102	Beta-Adrenoceptor Blockers	Emollient Skin Preparations	121	812354	0.01%	71	139471	0.05%
04065400	13100101	Products Used Against Nausea And Vertigo - Antihistamines	Antibacterial Preparations Only Used Topically	121	812354	0.01%	54	139471	0.04%
01060100	01070000	Bulk-Forming Laxatives	Local Products For Anal Or Rectal Problems	120	812354	0.01%	33	139471	0.02%
04020102	04070200	Second-Generation Antipsychotic Drugs	Opioid Analgesics	120	812354	0.01%	113	139471	0.08%
02040000	05010800	Beta-Adrenoceptor Blockers	Sulphonamides And Trimethoprim	120	812354	0.01%	79	139471	0.06%
01060100	05010800	Bulk-Forming Laxatives	Sulphonamides And Trimethoprim	120	812354	0.01%	49	139471	0.04%
05010103	06010400	Broad-Spectrum Penicillins	Treatment Of Hypoglycaemia	120	812354	0.01%	96	139471	0.07%
04030300	07040250	Selective Serotonin Re-Uptake Inhibitors (SSRI)	Urinary Incontinence	120	812354	0.01%	94	139471	0.07%
09050101	09060400	Calcium Supplements	Vitamin D	120	812354	0.01%	59	139471	0.04%
04080100	10010100	Control Of Epilepsy	Non-Steroidal Anti-Inflammatory Drugs	120	812354	0.01%	82	139471	0.06%
03040101	11080100	Non-Sedating Antihistamines	Tear Deficiency	120	812354	0.01%	82	139471	0.06%
04020101	13100101	First-Generation Antipsychotic Drugs	Antibacterial Preparations Only Used Topically	120	812354	0.01%	53	139471	0.04%
01020100	01020200	Antimuscarinics	Other Antispasmodics	119	812354	0.01%	61	139471	0.04%
02050501	04030300	Angiotensin-Converting Enzyme Inhibitors (ACE Inhibitors)	Selective Serotonin Re-Uptake Inhibitors (SSRI)	119	812354	0.01%	116	139471	0.08%
04065400	09060200	Products Used Against Nausea And Vertigo - Antihistamines	Vitamin B Group	119	812354	0.01%	42	139471	0.03%
09060700	10010100	Multivitamin And Multimineral Preparations	Non-Steroidal Anti-Inflammatory Drugs	119	812354	0.01%	62	139471	0.04%
01040200	13020102	Antimotility Products	Emollient Skin Preparations	119	812354	0.01%	76	139471	0.05%
13040000	13060100	Topical Corticosteroids	Topical Preparations For Acne	119	812354	0.01%	43	139471	0.03%
04065400	13060102	Products Used Against Nausea And Vertigo - Antihistamines	Topical Antibacterials For Acne	119	812354	0.01%	50	139471	0.04%
01020200	02040000	Other Antispasmodics	Beta-Adrenoceptor Blockers	118	812354	0.01%	98	139471	0.07%
02040000	05010101	Beta-Adrenoceptor Blockers	Benzylpenicillin And Phenoxymethylpenicillin	118	812354	0.01%	73	139471	0.05%
01030500	05020100	Proton Pump Inhibitors	Triazole Antifungals	118	812354	0.01%	72	139471	0.05%
01010201	06010101	Compound Alginate Preparations	Short-Acting Insulins	118	812354	0.01%	91	139471	0.07%
06010400	06020100	Treatment Of Hypoglycaemia	Thyroid Hormones	118	812354	0.01%	111	139471	0.08%
05010201	09010200	Cephalosporins	Drugs Used In Megaloblastic Anaemias	118	812354	0.01%	58	139471	0.04%
04030300	09020100	Selective Serotonin Re-Uptake Inhibitors (SSRI)	Oral Preparations For Fluid And Electrolyte Imbalance	118	812354	0.01%	93	139471	0.07%
02040000	09060400	Beta-Adrenoceptor Blockers	Vitamin D	118	812354	0.01%	84	139471	0.06%
05011100	13020102	Metronidazole And Tinidazole	Emollient Skin Preparations	118	812354	0.01%	58	139471	0.04%
04030300	13100200	Selective Serotonin Re-Uptake Inhibitors (SSRI)	Antifungal Preparations (Topical	118	812354	0.01%	79	139471	0.06%
04030300	14040200	Selective Serotonin Re-Uptake Inhibitors (SSRI)	Vaccines And Antisera - Influenza Vaccines	118	812354	0.01%	89	139471	0.06%
07020250	14040200	Preparations For Vaginal And Vulval Candidiasis	Vaccines And Antisera - Influenza Vaccines	118	812354	0.01%	45	139471	0.03%
01020000	04030300	Antispasmodics And Products Affecting Motility	Selective Serotonin Re-Uptake Inhibitors (SSRI)	117	812354	0.01%	95	139471	0.07%
02110000	04030300	Antifibrinolytic Products And Haemostatics	Selective Serotonin Re-Uptake Inhibitors (SSRI)	117	812354	0.01%	81	139471	0.06%
01040200	04030400	Antimotility Products	Other Antidepressants	117	812354	0.01%	101	139471	0.07%
02090000	04065600	Antiplatelet Products	Products Used Against Nausea And Vertigo - 5 HT3 Antagonists	117	812354	0.01%	53	139471	0.04%
03040101	05020100	Non-Sedating Antihistamines	Triazole Antifungals	117	812354	0.01%	62	139471	0.04%
03010101	05030201	Selective Beta 2 Agonists	Herpes Simplex And Varicella-Zoster Infection	117	812354	0.01%	71	139471	0.05%
01030500	06010101	Proton Pump Inhibitors	Short-Acting Insulins	117	812354	0.01%	106	139471	0.08%
06010202	09060400	Biguanides (Metformin)	Vitamin D	117	812354	0.01%	81	139471	0.06%
04070100	12020300	Non-Opioid And Compound Analgesics	Nasal Preparations For Infection	117	812354	0.01%	66	139471	0.05%
04105100	13020100	Substance Dependence - Nicotine Dependence	Emollients	117	812354	0.01%	59	139471	0.04%
03020000	13020103	Corticosteroids (For Respiratory Conditions)	Antimicrobial Emollients	117	812354	0.01%	82	139471	0.06%
04060000	13020103	Products Used Against Nausea And Vertigo	Antimicrobial Emollients	117	812354	0.01%	56	139471	0.04%
09010101	13040200	Oral Iron	Mild Topical Corticosteroids	117	812354	0.01%	39	139471	0.03%
04070100	13050200	Non-Opioid And Compound Analgesics	Preparations For Psoriasis	117	812354	0.01%	69	139471	0.05%
05010300	13060100	Tetracyclines	Topical Preparations For Acne	117	812354	0.01%	39	139471	0.03%
05010500	13060100	Macrolides	Topical Preparations For Acne	117	812354	0.01%	42	139471	0.03%
02050501	02120400	Angiotensin-Converting Enzyme Inhibitors (ACE Inhibitors)	Statins	116	812354	0.01%	97	139471	0.07%
01070200	04020101	Compound Haemorrhoid Products With Corticosteroids	First-Generation Antipsychotic Drugs	116	812354	0.01%	53	139471	0.04%
04010100	04070401	Hypnotics	Acute Migraine	116	812354	0.01%	88	139471	0.06%
04010201	05010102	Benzodiazepines	Penicillinase-Resistant Penicillins	116	812354	0.01%	91	139471	0.07%
01010101	05010201	Aluminium- And Magnesium- Containing Antacids	Cephalosporins	116	812354	0.01%	34	139471	0.02%
06010202	06010400	Biguanides (Metformin)	Treatment Of Hypoglycaemia	116	812354	0.01%	87	139471	0.06%
06010400	07020250	Treatment Of Hypoglycaemia	Preparations For Vaginal And Vulval Candidiasis	116	812354	0.01%	96	139471	0.07%
12010100	12010151	Drugs Acting On The Ear - Otitis Externa	Anti-Inflammatory Preparations	116	812354	0.01%	42	139471	0.03%
05020100	12020101	Triazole Antifungals	Corticosteroids Used In Nasal Allergy	116	812354	0.01%	54	139471	0.04%
03040101	13040200	Non-Sedating Antihistamines	Mild Topical Corticosteroids	116	812354	0.01%	58	139471	0.04%
04060000	13090000	Products Used Against Nausea And Vertigo	Shampoos And Other Preparations For Scalp And Hair Conditions	116	812354	0.01%	57	139471	0.04%
03010101	04050100	Selective Beta 2 Agonists	Anti-Obesity Products Acting On The Gastro-Intestinal Tract	115	812354	0.01%	89	139471	0.06%
05010102	05020100	Penicillinase-Resistant Penicillins	Triazole Antifungals	115	812354	0.01%	46	139471	0.03%
03040101	06040102	Non-Sedating Antihistamines	Progestogens And Progesterone Receptor Modulators	115	812354	0.01%	66	139471	0.05%
01010201	11080100	Compound Alginate Preparations	Tear Deficiency	115	812354	0.01%	63	139471	0.05%
09010101	12010151	Oral Iron	Anti-Inflammatory Preparations	115	812354	0.01%	43	139471	0.03%
01010201	13090100	Compound Alginate Preparations	Shampoos And Other Scalp Preparations	115	812354	0.01%	56	139471	0.04%
09010101	13100300	Oral Iron	Antiviral Preparations (Topical	115	812354	0.01%	48	139471	0.03%
02020100	02050200	Thiazides And Related Diuretics	Centrally Acting Antihypertensive Products	114	812354	0.01%	75	139471	0.05%
01060400	03010000	Osmotic Laxatives	Bronchodilators	114	812354	0.01%	85	139471	0.06%
01060100	03040102	Bulk-Forming Laxatives	Sedating Antihistamines	114	812354	0.01%	61	139471	0.04%
01020100	04030300	Antimuscarinics	Selective Serotonin Re-Uptake Inhibitors (SSRI)	114	812354	0.01%	88	139471	0.06%
04070200	05011100	Opioid Analgesics	Metronidazole And Tinidazole	114	812354	0.01%	75	139471	0.05%
04065500	05011100	Products Used Against Nausea And Vertigo - Domperidone & Metoclopramide	Metronidazole And Tinidazole	114	812354	0.01%	38	139471	0.03%
03020000	05011100	Corticosteroids (For Respiratory Conditions)	Metronidazole And Tinidazole	114	812354	0.01%	67	139471	0.05%
05010500	05020100	Macrolides	Triazole Antifungals	114	812354	0.01%	52	139471	0.04%
05010201	06010101	Cephalosporins	Short-Acting Insulins	114	812354	0.01%	89	139471	0.06%
04080100	09010101	Control Of Epilepsy	Oral Iron	114	812354	0.01%	75	139471	0.05%
04030400	09060400	Other Antidepressants	Vitamin D	114	812354	0.01%	99	139471	0.07%
04070200	09060400	Opioid Analgesics	Vitamin D	114	812354	0.01%	93	139471	0.07%
06010102	10010100	Intermediate- And Long-Acting Insulins	Non-Steroidal Anti-Inflammatory Drugs	114	812354	0.01%	92	139471	0.07%
01030500	11030100	Proton Pump Inhibitors	Antibacterials (In Eye Preparation)	114	812354	0.01%	62	139471	0.04%
04020101	11040200	First-Generation Antipsychotic Drugs	Other Anti-Inflammatory Eye Preparations (For The Eye)	114	812354	0.01%	67	139471	0.05%
11030100	11080100	Antibacterials (In Eye Preparation)	Tear Deficiency	114	812354	0.01%	37	139471	0.03%
09060700	13020102	Multivitamin And Multimineral Preparations	Emollient Skin Preparations	114	812354	0.01%	48	139471	0.03%
03030200	13040000	Leukotriene Receptor Antagonists	Topical Corticosteroids	114	812354	0.01%	100	139471	0.07%
04020100	13040000	Antipsychotic Products	Topical Corticosteroids	114	812354	0.01%	40	139471	0.03%
05010103	71580200	Broad-Spectrum Penicillins	Emollient Ointment	114	812354	0.01%	49	139471	0.04%
01020000	01060400	Antispasmodics And Products Affecting Motility	Osmotic Laxatives	113	812354	0.01%	60	139471	0.04%
01070000	01070200	Local Products For Anal Or Rectal Problems	Compound Haemorrhoid Products With Corticosteroids	113	812354	0.01%	39	139471	0.03%
01060200	03020000	Stimulant Laxatives	Corticosteroids (For Respiratory Conditions)	113	812354	0.01%	81	139471	0.06%
04070401	06020100	Acute Migraine	Thyroid Hormones	113	812354	0.01%	96	139471	0.07%
04080100	07020250	Control Of Epilepsy	Preparations For Vaginal And Vulval Candidiasis	113	812354	0.01%	71	139471	0.05%
01060400	09020102	Osmotic Laxatives	Oral Sodium And Water	113	812354	0.01%	38	139471	0.03%
03040101	09060700	Non-Sedating Antihistamines	Multivitamin And Multimineral Preparations	113	812354	0.01%	69	139471	0.05%
01030500	11080100	Proton Pump Inhibitors	Tear Deficiency	113	812354	0.01%	81	139471	0.06%
13020100	13040200	Emollients	Mild Topical Corticosteroids	113	812354	0.01%	36	139471	0.03%
01060400	13040200	Osmotic Laxatives	Mild Topical Corticosteroids	113	812354	0.01%	48	139471	0.03%
05010102	13060102	Penicillinase-Resistant Penicillins	Topical Antibacterials For Acne	113	812354	0.01%	38	139471	0.03%
13020100	13100101	Emollients	Antibacterial Preparations Only Used Topically	113	812354	0.01%	43	139471	0.03%
03040102	04010201	Sedating Antihistamines	Benzodiazepines	112	812354	0.01%	86	139471	0.06%
03040101	06010102	Non-Sedating Antihistamines	Intermediate- And Long-Acting Insulins	112	812354	0.01%	91	139471	0.07%
04065600	09010101	Products Used Against Nausea And Vertigo - 5 HT3 Antagonists	Oral Iron	112	812354	0.01%	50	139471	0.04%
04030300	09020102	Selective Serotonin Re-Uptake Inhibitors (SSRI)	Oral Sodium And Water	112	812354	0.01%	78	139471	0.06%
05010102	11040200	Penicillinase-Resistant Penicillins	Other Anti-Inflammatory Eye Preparations (For The Eye)	112	812354	0.01%	52	139471	0.04%
11080100	12020101	Tear Deficiency	Corticosteroids Used In Nasal Allergy	112	812354	0.01%	71	139471	0.05%
01010101	13040000	Aluminium- And Magnesium- Containing Antacids	Topical Corticosteroids	112	812354	0.01%	42	139471	0.03%
04080100	13040000	Control Of Epilepsy	Topical Corticosteroids	112	812354	0.01%	80	139471	0.06%
04070100	13060101	Non-Opioid And Compound Analgesics	Benzoyl Peroxide And Azelaic Acid For Acne	112	812354	0.01%	45	139471	0.03%
01030500	01050300	Proton Pump Inhibitors	Products Affecting The Immune Response In Chronic Bowel Problems	111	812354	0.01%	81	139471	0.06%
02090000	03040102	Antiplatelet Products	Sedating Antihistamines	111	812354	0.01%	53	139471	0.04%
03010101	04070402	Selective Beta 2 Agonists	Prophylaxis Of Migraine	111	812354	0.01%	99	139471	0.07%
04070401	05010201	Acute Migraine	Cephalosporins	111	812354	0.01%	61	139471	0.04%
04030100	05010300	Tricyclic And Related Antidepressants	Tetracyclines	111	812354	0.01%	83	139471	0.06%
05010103	06040104	Broad-Spectrum Penicillins	Selective Estrogen Receptor Modulators (Serms)	111	812354	0.01%	57	139471	0.04%
03090200	07020250	Demulcent And Expectorant Cough Preparations	Preparations For Vaginal And Vulval Candidiasis	111	812354	0.01%	32	139471	0.02%
02080100	09010101	Parenteral Anticoagulants	Oral Iron	111	812354	0.01%	59	139471	0.04%
03010101	09020102	Selective Beta 2 Agonists	Oral Sodium And Water	111	812354	0.01%	61	139471	0.04%
04070100	09060200	Non-Opioid And Compound Analgesics	Vitamin B Group	111	812354	0.01%	68	139471	0.05%
04060000	10030250	Products Used Against Nausea And Vertigo	Topical Nsaids And Counter Irritants	111	812354	0.01%	43	139471	0.03%
13020100	13090100	Emollients	Shampoos And Other Scalp Preparations	111	812354	0.01%	60	139471	0.04%
01030100	01060100	H2-Receptor Antagonists	Bulk-Forming Laxatives	110	812354	0.01%	47	139471	0.03%
02050200	03010101	Centrally Acting Antihypertensive Products	Selective Beta 2 Agonists	110	812354	0.01%	94	139471	0.07%
01010101	04020101	Aluminium- And Magnesium- Containing Antacids	First-Generation Antipsychotic Drugs	110	812354	0.01%	35	139471	0.03%
03010101	04030000	Selective Beta 2 Agonists	Antidepressants	110	812354	0.01%	102	139471	0.07%
04010201	05010800	Benzodiazepines	Sulphonamides And Trimethoprim	110	812354	0.01%	67	139471	0.05%
01070200	06020100	Compound Haemorrhoid Products With Corticosteroids	Thyroid Hormones	110	812354	0.01%	63	139471	0.05%
06010202	06040104	Biguanides (Metformin)	Selective Estrogen Receptor Modulators (Serms)	110	812354	0.01%	61	139471	0.04%
02080100	07020250	Parenteral Anticoagulants	Preparations For Vaginal And Vulval Candidiasis	110	812354	0.01%	61	139471	0.04%
05011300	11040200	Urinary-Tract Infections	Other Anti-Inflammatory Eye Preparations (For The Eye)	110	812354	0.01%	54	139471	0.04%
01030500	12030100	Proton Pump Inhibitors	Drugs For Oral Ulceration And Inflammation	110	812354	0.01%	68	139471	0.05%
01050200	13020101	Corticosteroids In Chronic Bowel Problems	Emollient Bath Additives And Shower Preparations	110	812354	0.01%	90	139471	0.06%
05010101	13100101	Benzylpenicillin And Phenoxymethylpenicillin	Antibacterial Preparations Only Used Topically	110	812354	0.01%	35	139471	0.03%
13020103	71580200	Antimicrobial Emollients	Emollient Ointment	110	812354	0.01%	60	139471	0.04%
01060100	04010100	Bulk-Forming Laxatives	Hypnotics	109	812354	0.01%	68	139471	0.05%
01060100	04070200	Bulk-Forming Laxatives	Opioid Analgesics	109	812354	0.01%	69	139471	0.05%
03020000	04070401	Corticosteroids (For Respiratory Conditions)	Acute Migraine	109	812354	0.01%	89	139471	0.06%
01010201	04080100	Compound Alginate Preparations	Control Of Epilepsy	109	812354	0.01%	79	139471	0.06%
01060100	05010101	Bulk-Forming Laxatives	Benzylpenicillin And Phenoxymethylpenicillin	109	812354	0.01%	50	139471	0.04%
04010100	05011100	Hypnotics	Metronidazole And Tinidazole	109	812354	0.01%	60	139471	0.04%
03040101	05011100	Non-Sedating Antihistamines	Metronidazole And Tinidazole	109	812354	0.01%	55	139471	0.04%
07020100	07020250	Preparations For Vaginal And Vulval Changes	Preparations For Vaginal And Vulval Candidiasis	109	812354	0.01%	31	139471	0.02%
05010103	12500200	Broad-Spectrum Penicillins	Nasal Spray	109	812354	0.01%	44	139471	0.03%
05010101	13020100	Benzylpenicillin And Phenoxymethylpenicillin	Emollients	109	812354	0.01%	39	139471	0.03%
07020250	13060101	Preparations For Vaginal And Vulval Candidiasis	Benzoyl Peroxide And Azelaic Acid For Acne	109	812354	0.01%	33	139471	0.02%
01010201	13100200	Compound Alginate Preparations	Antifungal Preparations (Topical	109	812354	0.01%	49	139471	0.04%
01050100	03010101	Aminosalicylates	Selective Beta 2 Agonists	108	812354	0.01%	96	139471	0.07%
01050200	04010100	Corticosteroids In Chronic Bowel Problems	Hypnotics	108	812354	0.01%	83	139471	0.06%
01030100	04010201	H2-Receptor Antagonists	Benzodiazepines	108	812354	0.01%	80	139471	0.06%
01010101	04030300	Aluminium- And Magnesium- Containing Antacids	Selective Serotonin Re-Uptake Inhibitors (SSRI)	108	812354	0.01%	75	139471	0.05%
04020101	05010300	First-Generation Antipsychotic Drugs	Tetracyclines	108	812354	0.01%	55	139471	0.04%
01050200	05011300	Corticosteroids In Chronic Bowel Problems	Urinary-Tract Infections	108	812354	0.01%	71	139471	0.05%
04010201	06020100	Benzodiazepines	Thyroid Hormones	108	812354	0.01%	90	139471	0.06%
01060400	09020100	Osmotic Laxatives	Oral Preparations For Fluid And Electrolyte Imbalance	108	812354	0.01%	33	139471	0.02%
06040103	09060400	Progestogen Products Doubling (In House Use)	Vitamin D	108	812354	0.01%	40	139471	0.03%
09010200	09060400	Drugs Used In Megaloblastic Anaemias	Vitamin D	108	812354	0.01%	64	139471	0.05%
05011300	09060700	Urinary-Tract Infections	Multivitamin And Multimineral Preparations	108	812354	0.01%	36	139471	0.03%
07020250	11080100	Preparations For Vaginal And Vulval Candidiasis	Tear Deficiency	108	812354	0.01%	52	139471	0.04%
01070200	12020101	Compound Haemorrhoid Products With Corticosteroids	Corticosteroids Used In Nasal Allergy	108	812354	0.01%	62	139471	0.04%
04030300	13030000	Selective Serotonin Re-Uptake Inhibitors (SSRI)	Topical Local Anaesthetics And Antipruritics	108	812354	0.01%	79	139471	0.06%
01030500	13090000	Proton Pump Inhibitors	Shampoos And Other Preparations For Scalp And Hair Conditions	108	812354	0.01%	66	139471	0.05%
13020102	13100200	Emollient Skin Preparations	Antifungal Preparations (Topical	108	812354	0.01%	33	139471	0.02%
02040000	04020102	Beta-Adrenoceptor Blockers	Second-Generation Antipsychotic Drugs	107	812354	0.01%	103	139471	0.07%
04070300	05010103	Neuropathic Pain	Broad-Spectrum Penicillins	107	812354	0.01%	83	139471	0.06%
05010201	06010202	Cephalosporins	Biguanides (Metformin)	107	812354	0.01%	70	139471	0.05%
01050200	06040101	Corticosteroids In Chronic Bowel Problems	Oestrogens And HRT	107	812354	0.01%	46	139471	0.03%
04105100	11030100	Substance Dependence - Nicotine Dependence	Antibacterials (In Eye Preparation)	107	812354	0.01%	44	139471	0.03%
03010000	11040200	Bronchodilators	Other Anti-Inflammatory Eye Preparations (For The Eye)	107	812354	0.01%	60	139471	0.04%
09010101	13100200	Oral Iron	Antifungal Preparations (Topical	107	812354	0.01%	39	139471	0.03%
03010101	03090100	Selective Beta 2 Agonists	Cough Suppressants	106	812354	0.01%	53	139471	0.04%
02090000	04010201	Antiplatelet Products	Benzodiazepines	106	812354	0.01%	81	139471	0.06%
02080100	04060000	Parenteral Anticoagulants	Products Used Against Nausea And Vertigo	106	812354	0.01%	50	139471	0.04%
04030400	05010300	Other Antidepressants	Tetracyclines	106	812354	0.01%	91	139471	0.07%
01030100	05010800	H2-Receptor Antagonists	Sulphonamides And Trimethoprim	106	812354	0.01%	40	139471	0.03%
05010800	05011200	Sulphonamides And Trimethoprim	Quinolones	106	812354	0.01%	32	139471	0.02%
06010102	06040103	Intermediate- And Long-Acting Insulins	Progestogen Products Doubling (In House Use)	106	812354	0.01%	77	139471	0.06%
04070100	07020251	Non-Opioid And Compound Analgesics	Preparations For Other Vaginal Infections	106	812354	0.01%	48	139471	0.03%
05010103	09060200	Broad-Spectrum Penicillins	Vitamin B Group	106	812354	0.01%	49	139471	0.04%
01020200	13020102	Other Antispasmodics	Emollient Skin Preparations	106	812354	0.01%	72	139471	0.05%
05010300	13020102	Tetracyclines	Emollient Skin Preparations	106	812354	0.01%	60	139471	0.04%
04020102	13040000	Second-Generation Antipsychotic Drugs	Topical Corticosteroids	106	812354	0.01%	96	139471	0.07%
01010101	01030100	Aluminium- And Magnesium- Containing Antacids	H2-Receptor Antagonists	105	812354	0.01%	34	139471	0.02%
01020100	01060400	Antimuscarinics	Osmotic Laxatives	105	812354	0.01%	48	139471	0.03%
01040200	02090000	Antimotility Products	Antiplatelet Products	105	812354	0.01%	64	139471	0.05%
01010101	03010101	Aluminium- And Magnesium- Containing Antacids	Selective Beta 2 Agonists	105	812354	0.01%	67	139471	0.05%
02060200	04030300	Calcium-Channel Blockers	Selective Serotonin Re-Uptake Inhibitors (SSRI)	105	812354	0.01%	94	139471	0.07%
01050300	04070100	Products Affecting The Immune Response In Chronic Bowel Problems	Non-Opioid And Compound Analgesics	105	812354	0.01%	78	139471	0.06%
04010100	05010300	Hypnotics	Tetracyclines	105	812354	0.01%	72	139471	0.05%
02050501	06010202	Angiotensin-Converting Enzyme Inhibitors (ACE Inhibitors)	Biguanides (Metformin)	105	812354	0.01%	92	139471	0.07%
04065400	13020101	Products Used Against Nausea And Vertigo - Antihistamines	Emollient Bath Additives And Shower Preparations	105	812354	0.01%	60	139471	0.04%
01060200	13020102	Stimulant Laxatives	Emollient Skin Preparations	105	812354	0.01%	65	139471	0.05%
01070200	13020102	Compound Haemorrhoid Products With Corticosteroids	Emollient Skin Preparations	105	812354	0.01%	43	139471	0.03%
04070100	13070000	Non-Opioid And Compound Analgesics	Preparations For Warts And Calluses	105	812354	0.01%	41	139471	0.03%
01030500	04080100	Proton Pump Inhibitors	Control Of Epilepsy	104	812354	0.01%	86	139471	0.06%
03010101	05011200	Selective Beta 2 Agonists	Quinolones	104	812354	0.01%	65	139471	0.05%
02040000	06010101	Beta-Adrenoceptor Blockers	Short-Acting Insulins	104	812354	0.01%	97	139471	0.07%
02040000	06010102	Beta-Adrenoceptor Blockers	Intermediate- And Long-Acting Insulins	104	812354	0.01%	98	139471	0.07%
06020100	09060700	Thyroid Hormones	Multivitamin And Multimineral Preparations	104	812354	0.01%	67	139471	0.05%
02040000	09060700	Beta-Adrenoceptor Blockers	Multivitamin And Multimineral Preparations	104	812354	0.01%	72	139471	0.05%
03040102	11030100	Sedating Antihistamines	Antibacterials (In Eye Preparation)	104	812354	0.01%	41	139471	0.03%
04020101	12010151	First-Generation Antipsychotic Drugs	Anti-Inflammatory Preparations	104	812354	0.01%	42	139471	0.03%
06040103	12010151	Progestogen Products Doubling (In House Use)	Anti-Inflammatory Preparations	104	812354	0.01%	29	139471	0.02%
01060200	12020101	Stimulant Laxatives	Corticosteroids Used In Nasal Allergy	104	812354	0.01%	75	139471	0.05%
01070000	13040000	Local Products For Anal Or Rectal Problems	Topical Corticosteroids	104	812354	0.01%	50	139471	0.04%
04060000	13060100	Products Used Against Nausea And Vertigo	Topical Preparations For Acne	104	812354	0.01%	36	139471	0.03%
04020101	13060102	First-Generation Antipsychotic Drugs	Topical Antibacterials For Acne	104	812354	0.01%	46	139471	0.03%
03040101	71580200	Non-Sedating Antihistamines	Emollient Ointment	104	812354	0.01%	53	139471	0.04%
01070000	01070100	Local Products For Anal Or Rectal Problems	Soothing Haemorrhoid Products	103	812354	0.01%	23	139471	0.02%
01070200	03020000	Compound Haemorrhoid Products With Corticosteroids	Corticosteroids (For Respiratory Conditions)	103	812354	0.01%	69	139471	0.05%
05010101	05020100	Benzylpenicillin And Phenoxymethylpenicillin	Triazole Antifungals	103	812354	0.01%	37	139471	0.03%
01060400	06010101	Osmotic Laxatives	Short-Acting Insulins	103	812354	0.01%	83	139471	0.06%
02050501	06010102	Angiotensin-Converting Enzyme Inhibitors (ACE Inhibitors)	Intermediate- And Long-Acting Insulins	103	812354	0.01%	89	139471	0.06%
06040103	12030100	Progestogen Products Doubling (In House Use)	Drugs For Oral Ulceration And Inflammation	103	812354	0.01%	30	139471	0.02%
01060400	12030100	Osmotic Laxatives	Drugs For Oral Ulceration And Inflammation	103	812354	0.01%	40	139471	0.03%
04065600	13040000	Products Used Against Nausea And Vertigo - 5 HT3 Antagonists	Topical Corticosteroids	103	812354	0.01%	43	139471	0.03%
05010103	13060101	Broad-Spectrum Penicillins	Benzoyl Peroxide And Azelaic Acid For Acne	103	812354	0.01%	27	139471	0.02%
12020101	13090000	Corticosteroids Used In Nasal Allergy	Shampoos And Other Preparations For Scalp And Hair Conditions	103	812354	0.01%	68	139471	0.05%
01060400	13100200	Osmotic Laxatives	Antifungal Preparations (Topical	103	812354	0.01%	41	139471	0.03%
07020250	71580200	Preparations For Vaginal And Vulval Candidiasis	Emollient Ointment	103	812354	0.01%	42	139471	0.03%
01060300	01060400	Faecal Softeners	Osmotic Laxatives	102	812354	0.01%	58	139471	0.04%
04030000	04060000	Antidepressants	Products Used Against Nausea And Vertigo	102	812354	0.01%	84	139471	0.06%
01070200	04065400	Compound Haemorrhoid Products With Corticosteroids	Products Used Against Nausea And Vertigo - Antihistamines	102	812354	0.01%	45	139471	0.03%
01010101	04065400	Aluminium- And Magnesium- Containing Antacids	Products Used Against Nausea And Vertigo - Antihistamines	102	812354	0.01%	30	139471	0.02%
01020200	04105100	Other Antispasmodics	Substance Dependence - Nicotine Dependence	102	812354	0.01%	51	139471	0.04%
01070200	05010500	Compound Haemorrhoid Products With Corticosteroids	Macrolides	102	812354	0.01%	40	139471	0.03%
04030300	05011200	Selective Serotonin Re-Uptake Inhibitors (SSRI)	Quinolones	102	812354	0.01%	69	139471	0.05%
02050501	06010101	Angiotensin-Converting Enzyme Inhibitors (ACE Inhibitors)	Short-Acting Insulins	102	812354	0.01%	91	139471	0.07%
04070100	07040250	Non-Opioid And Compound Analgesics	Urinary Incontinence	102	812354	0.01%	75	139471	0.05%
09010101	09020102	Oral Iron	Oral Sodium And Water	102	812354	0.01%	26	139471	0.02%
04065600	09060200	Products Used Against Nausea And Vertigo - 5 HT3 Antagonists	Vitamin B Group	102	812354	0.01%	36	139471	0.03%
04020100	10010100	Antipsychotic Products	Non-Steroidal Anti-Inflammatory Drugs	102	812354	0.01%	37	139471	0.03%
04010100	11040200	Hypnotics	Other Anti-Inflammatory Eye Preparations (For The Eye)	102	812354	0.01%	62	139471	0.04%
05010101	11040200	Benzylpenicillin And Phenoxymethylpenicillin	Other Anti-Inflammatory Eye Preparations (For The Eye)	102	812354	0.01%	39	139471	0.03%
06020100	11080100	Thyroid Hormones	Tear Deficiency	102	812354	0.01%	73	139471	0.05%
01060400	11080100	Osmotic Laxatives	Tear Deficiency	102	812354	0.01%	61	139471	0.04%
01030500	12010151	Proton Pump Inhibitors	Anti-Inflammatory Preparations	102	812354	0.01%	68	139471	0.05%
03040101	12010151	Non-Sedating Antihistamines	Anti-Inflammatory Preparations	102	812354	0.01%	56	139471	0.04%
05011100	12020101	Metronidazole And Tinidazole	Corticosteroids Used In Nasal Allergy	102	812354	0.01%	51	139471	0.04%
12020101	12030100	Corticosteroids Used In Nasal Allergy	Drugs For Oral Ulceration And Inflammation	102	812354	0.01%	54	139471	0.04%
05011300	13020100	Urinary-Tract Infections	Emollients	102	812354	0.01%	54	139471	0.04%
06010202	13020102	Biguanides (Metformin)	Emollient Skin Preparations	102	812354	0.01%	83	139471	0.06%
13020100	13050200	Emollients	Preparations For Psoriasis	102	812354	0.01%	55	139471	0.04%
13060101	13060102	Benzoyl Peroxide And Azelaic Acid For Acne	Topical Antibacterials For Acne	102	812354	0.01%	20	139471	0.01%
01060400	13100300	Osmotic Laxatives	Antiviral Preparations (Topical	102	812354	0.01%	40	139471	0.03%
07020250	15020000	Preparations For Vaginal And Vulval Candidiasis	Local Anaesthesia	102	812354	0.01%	37	139471	0.03%
01010201	04020102	Compound Alginate Preparations	Second-Generation Antipsychotic Drugs	101	812354	0.01%	90	139471	0.06%
01020000	04060000	Antispasmodics And Products Affecting Motility	Products Used Against Nausea And Vertigo	101	812354	0.01%	57	139471	0.04%
04030400	05010101	Other Antidepressants	Benzylpenicillin And Phenoxymethylpenicillin	101	812354	0.01%	79	139471	0.06%
02050501	05010103	Angiotensin-Converting Enzyme Inhibitors (ACE Inhibitors)	Broad-Spectrum Penicillins	101	812354	0.01%	89	139471	0.06%
01060200	05010500	Stimulant Laxatives	Macrolides	101	812354	0.01%	57	139471	0.04%
05010300	05010800	Tetracyclines	Sulphonamides And Trimethoprim	101	812354	0.01%	35	139471	0.03%
01030100	09060400	H2-Receptor Antagonists	Vitamin D	101	812354	0.01%	60	139471	0.04%
04070300	10010100	Neuropathic Pain	Non-Steroidal Anti-Inflammatory Drugs	101	812354	0.01%	75	139471	0.05%
04030100	10030250	Tricyclic And Related Antidepressants	Topical Nsaids And Counter Irritants	101	812354	0.01%	77	139471	0.06%
07020250	12020300	Preparations For Vaginal And Vulval Candidiasis	Nasal Preparations For Infection	101	812354	0.01%	38	139471	0.03%
09010101	13020103	Oral Iron	Antimicrobial Emollients	101	812354	0.01%	39	139471	0.03%
05010103	13040100	Broad-Spectrum Penicillins	Topical Corticosteroids With Antimicrobials	101	812354	0.01%	38	139471	0.03%
13060100	13060102	Topical Preparations For Acne	Topical Antibacterials For Acne	101	812354	0.01%	30	139471	0.02%
03020000	13060102	Corticosteroids (For Respiratory Conditions)	Topical Antibacterials For Acne	101	812354	0.01%	50	139471	0.04%
01030500	13060102	Proton Pump Inhibitors	Topical Antibacterials For Acne	101	812354	0.01%	52	139471	0.04%
06020100	13100101	Thyroid Hormones	Antibacterial Preparations Only Used Topically	101	812354	0.01%	68	139471	0.05%
03010101	13100400	Selective Beta 2 Agonists	Parasiticidal Preparations (Topical)	101	812354	0.01%	51	139471	0.04%
03040102	13100400	Sedating Antihistamines	Parasiticidal Preparations (Topical)	101	812354	0.01%	28	139471	0.02%
01060400	15020000	Osmotic Laxatives	Local Anaesthesia	101	812354	0.01%	36	139471	0.03%
01060200	04010201	Stimulant Laxatives	Benzodiazepines	100	812354	0.01%	75	139471	0.05%
04070402	05010103	Prophylaxis Of Migraine	Broad-Spectrum Penicillins	100	812354	0.01%	71	139471	0.05%
03020000	06010202	Corticosteroids (For Respiratory Conditions)	Biguanides (Metformin)	100	812354	0.01%	85	139471	0.06%
01060200	06020100	Stimulant Laxatives	Thyroid Hormones	100	812354	0.01%	75	139471	0.05%
04065500	06040102	Products Used Against Nausea And Vertigo - Domperidone & Metoclopramide	Progestogens And Progesterone Receptor Modulators	100	812354	0.01%	52	139471	0.04%
07020250	09050101	Preparations For Vaginal And Vulval Candidiasis	Calcium Supplements	100	812354	0.01%	42	139471	0.03%
04010100	09060400	Hypnotics	Vitamin D	100	812354	0.01%	58	139471	0.04%
05010800	11040200	Sulphonamides And Trimethoprim	Other Anti-Inflammatory Eye Preparations (For The Eye)	100	812354	0.01%	55	139471	0.04%
05010800	13020100	Sulphonamides And Trimethoprim	Emollients	100	812354	0.01%	41	139471	0.03%
13040000	13050300	Topical Corticosteroids	Drugs Affecting The Immune Response For Eczema And Psoriasis	100	812354	0.01%	73	139471	0.05%
06040103	13060100	Progestogen Products Doubling (In House Use)	Topical Preparations For Acne	100	812354	0.01%	29	139471	0.02%
04030300	13060101	Selective Serotonin Re-Uptake Inhibitors (SSRI)	Benzoyl Peroxide And Azelaic Acid For Acne	100	812354	0.01%	72	139471	0.05%
02020100	02060200	Thiazides And Related Diuretics	Calcium-Channel Blockers	99	812354	0.01%	70	139471	0.05%
02110000	03010101	Antifibrinolytic Products And Haemostatics	Selective Beta 2 Agonists	99	812354	0.01%	78	139471	0.06%
01020200	04010201	Other Antispasmodics	Benzodiazepines	99	812354	0.01%	76	139471	0.05%
01050100	04030300	Aminosalicylates	Selective Serotonin Re-Uptake Inhibitors (SSRI)	99	812354	0.01%	91	139471	0.07%
01010000	04070100	Indigestion And GORD (Gastro-Oesophageal Reflux Disease)	Non-Opioid And Compound Analgesics	99	812354	0.01%	37	139471	0.03%
01040200	05010101	Antimotility Products	Benzylpenicillin And Phenoxymethylpenicillin	99	812354	0.01%	37	139471	0.03%
06010101	06040103	Short-Acting Insulins	Progestogen Products Doubling (In House Use)	99	812354	0.01%	75	139471	0.05%
04020102	06040103	Second-Generation Antipsychotic Drugs	Progestogen Products Doubling (In House Use)	99	812354	0.01%	85	139471	0.06%
03010000	13020100	Bronchodilators	Emollients	99	812354	0.01%	65	139471	0.05%
01060400	13060100	Osmotic Laxatives	Topical Preparations For Acne	99	812354	0.01%	40	139471	0.03%
01050200	03010200	Corticosteroids In Chronic Bowel Problems	Antimuscarinic Bronchodilators	98	812354	0.01%	84	139471	0.06%
04010201	05010101	Benzodiazepines	Benzylpenicillin And Phenoxymethylpenicillin	98	812354	0.01%	66	139471	0.05%
01060100	05010102	Bulk-Forming Laxatives	Penicillinase-Resistant Penicillins	98	812354	0.01%	44	139471	0.03%
05010800	06010102	Sulphonamides And Trimethoprim	Intermediate- And Long-Acting Insulins	98	812354	0.01%	75	139471	0.05%
01030500	09050101	Proton Pump Inhibitors	Calcium Supplements	98	812354	0.01%	70	139471	0.05%
04065400	09060700	Products Used Against Nausea And Vertigo - Antihistamines	Multivitamin And Multimineral Preparations	98	812354	0.01%	36	139471	0.03%
11030100	12010151	Antibacterials (In Eye Preparation)	Anti-Inflammatory Preparations	98	812354	0.01%	29	139471	0.02%
04010100	13020101	Hypnotics	Emollient Bath Additives And Shower Preparations	98	812354	0.01%	67	139471	0.05%
05010102	13040200	Penicillinase-Resistant Penicillins	Mild Topical Corticosteroids	98	812354	0.01%	37	139471	0.03%
01010201	13060100	Compound Alginate Preparations	Topical Preparations For Acne	98	812354	0.01%	48	139471	0.03%
03010101	15020000	Selective Beta 2 Agonists	Local Anaesthesia	98	812354	0.01%	61	139471	0.04%
01030100	01060200	H2-Receptor Antagonists	Stimulant Laxatives	97	812354	0.01%	54	139471	0.04%
01010201	02050200	Compound Alginate Preparations	Centrally Acting Antihypertensive Products	97	812354	0.01%	70	139471	0.05%
01060400	02080100	Osmotic Laxatives	Parenteral Anticoagulants	97	812354	0.01%	70	139471	0.05%
03010101	03010400	Selective Beta 2 Agonists	Compound Bronchodilator Products	97	812354	0.01%	73	139471	0.05%
01050200	05010101	Corticosteroids In Chronic Bowel Problems	Benzylpenicillin And Phenoxymethylpenicillin	97	812354	0.01%	50	139471	0.04%
01060200	05010800	Stimulant Laxatives	Sulphonamides And Trimethoprim	97	812354	0.01%	50	139471	0.04%
03040102	13100101	Sedating Antihistamines	Antibacterial Preparations Only Used Topically	97	812354	0.01%	40	139471	0.03%
04030300	15020000	Selective Serotonin Re-Uptake Inhibitors (SSRI)	Local Anaesthesia	97	812354	0.01%	72	139471	0.05%
01030500	03010000	Proton Pump Inhibitors	Bronchodilators	96	812354	0.01%	72	139471	0.05%
03040102	04065600	Sedating Antihistamines	Products Used Against Nausea And Vertigo - 5 HT3 Antagonists	96	812354	0.01%	28	139471	0.02%
02090000	06010400	Antiplatelet Products	Treatment Of Hypoglycaemia	96	812354	0.01%	82	139471	0.06%
02080100	06040101	Parenteral Anticoagulants	Oestrogens And HRT	96	812354	0.01%	41	139471	0.03%
04030100	09060400	Tricyclic And Related Antidepressants	Vitamin D	96	812354	0.01%	70	139471	0.05%
06010101	10010100	Short-Acting Insulins	Non-Steroidal Anti-Inflammatory Drugs	96	812354	0.01%	78	139471	0.06%
11040200	11080100	Other Anti-Inflammatory Eye Preparations (For The Eye)	Tear Deficiency	96	812354	0.01%	43	139471	0.03%
07020250	12010100	Preparations For Vaginal And Vulval Candidiasis	Drugs Acting On The Ear - Otitis Externa	96	812354	0.01%	30	139471	0.02%
12020101	13020103	Corticosteroids Used In Nasal Allergy	Antimicrobial Emollients	96	812354	0.01%	70	139471	0.05%
01010201	13030000	Compound Alginate Preparations	Topical Local Anaesthetics And Antipruritics	96	812354	0.01%	39	139471	0.03%
13020101	13040200	Emollient Bath Additives And Shower Preparations	Mild Topical Corticosteroids	96	812354	0.01%	47	139471	0.03%
05010300	13060103	Tetracyclines	Topical Retinoids And Related Preparations For Acne	96	812354	0.01%	23	139471	0.02%
05011300	13100101	Urinary-Tract Infections	Antibacterial Preparations Only Used Topically	96	812354	0.01%	38	139471	0.03%
01020200	02090000	Other Antispasmodics	Antiplatelet Products	95	812354	0.01%	68	139471	0.05%
02060200	03010101	Calcium-Channel Blockers	Selective Beta 2 Agonists	95	812354	0.01%	84	139471	0.06%
01070200	03040101	Compound Haemorrhoid Products With Corticosteroids	Non-Sedating Antihistamines	95	812354	0.01%	50	139471	0.04%
01020200	03040102	Other Antispasmodics	Sedating Antihistamines	95	812354	0.01%	58	139471	0.04%
01050200	04010201	Corticosteroids In Chronic Bowel Problems	Benzodiazepines	95	812354	0.01%	83	139471	0.06%
04010201	04080100	Benzodiazepines	Control Of Epilepsy	95	812354	0.01%	85	139471	0.06%
01050200	04105100	Corticosteroids In Chronic Bowel Problems	Substance Dependence - Nicotine Dependence	95	812354	0.01%	57	139471	0.04%
03010000	04105100	Bronchodilators	Substance Dependence - Nicotine Dependence	95	812354	0.01%	52	139471	0.04%
01040200	04105100	Antimotility Products	Substance Dependence - Nicotine Dependence	95	812354	0.01%	53	139471	0.04%
01060400	06010102	Osmotic Laxatives	Intermediate- And Long-Acting Insulins	95	812354	0.01%	76	139471	0.05%
04020000	07020250	Products Used In Psychoses And Related Disorders	Preparations For Vaginal And Vulval Candidiasis	95	812354	0.01%	60	139471	0.04%
01070100	07020250	Soothing Haemorrhoid Products	Preparations For Vaginal And Vulval Candidiasis	95	812354	0.01%	39	139471	0.03%
01050200	09050101	Corticosteroids In Chronic Bowel Problems	Calcium Supplements	95	812354	0.01%	65	139471	0.05%
01050200	10010300	Corticosteroids In Chronic Bowel Problems	Drugs That Suppress The Rheumatic Disease Process	95	812354	0.01%	68	139471	0.05%
02090000	10010300	Antiplatelet Products	Drugs That Suppress The Rheumatic Disease Process	95	812354	0.01%	69	139471	0.05%
03040101	10030250	Non-Sedating Antihistamines	Topical Nsaids And Counter Irritants	95	812354	0.01%	59	139471	0.04%
05010300	13060101	Tetracyclines	Benzoyl Peroxide And Azelaic Acid For Acne	95	812354	0.01%	25	139471	0.02%
03040101	13090100	Non-Sedating Antihistamines	Shampoos And Other Scalp Preparations	95	812354	0.01%	61	139471	0.04%
04105100	13100101	Substance Dependence - Nicotine Dependence	Antibacterial Preparations Only Used Topically	95	812354	0.01%	30	139471	0.02%
01030500	02080100	Proton Pump Inhibitors	Parenteral Anticoagulants	94	812354	0.01%	65	139471	0.05%
04070200	04080100	Opioid Analgesics	Control Of Epilepsy	94	812354	0.01%	82	139471	0.06%
04020300	04080100	Products Used For Mania And Hypomania	Control Of Epilepsy	94	812354	0.01%	55	139471	0.04%
03040101	06010101	Non-Sedating Antihistamines	Short-Acting Insulins	94	812354	0.01%	76	139471	0.05%
05010500	06040102	Macrolides	Progestogens And Progesterone Receptor Modulators	94	812354	0.01%	40	139471	0.03%
05011300	09010200	Urinary-Tract Infections	Drugs Used In Megaloblastic Anaemias	94	812354	0.01%	43	139471	0.03%
07020250	09020100	Preparations For Vaginal And Vulval Candidiasis	Oral Preparations For Fluid And Electrolyte Imbalance	94	812354	0.01%	34	139471	0.02%
06040103	10030250	Progestogen Products Doubling (In House Use)	Topical Nsaids And Counter Irritants	94	812354	0.01%	39	139471	0.03%
02080100	13040000	Parenteral Anticoagulants	Topical Corticosteroids	94	812354	0.01%	51	139471	0.04%
06020100	13060102	Thyroid Hormones	Topical Antibacterials For Acne	94	812354	0.01%	56	139471	0.04%
05010201	13090000	Cephalosporins	Shampoos And Other Preparations For Scalp And Hair Conditions	94	812354	0.01%	44	139471	0.03%
06040103	13100300	Progestogen Products Doubling (In House Use)	Antiviral Preparations (Topical	94	812354	0.01%	28	139471	0.02%
13020102	13100400	Emollient Skin Preparations	Parasiticidal Preparations (Topical)	94	812354	0.01%	27	139471	0.02%
01010201	01020100	Compound Alginate Preparations	Antimuscarinics	93	812354	0.01%	45	139471	0.03%
04010201	04030000	Benzodiazepines	Antidepressants	93	812354	0.01%	85	139471	0.06%
04030000	05010103	Antidepressants	Broad-Spectrum Penicillins	93	812354	0.01%	73	139471	0.05%
01070100	05010103	Soothing Haemorrhoid Products	Broad-Spectrum Penicillins	93	812354	0.01%	43	139471	0.03%
04060000	06010202	Products Used Against Nausea And Vertigo	Biguanides (Metformin)	93	812354	0.01%	62	139471	0.04%
03040102	09060400	Sedating Antihistamines	Vitamin D	93	812354	0.01%	43	139471	0.03%
05010201	10030250	Cephalosporins	Topical Nsaids And Counter Irritants	93	812354	0.01%	35	139471	0.03%
05010800	11030100	Sulphonamides And Trimethoprim	Antibacterials (In Eye Preparation)	93	812354	0.01%	33	139471	0.02%
04070100	11040100	Non-Opioid And Compound Analgesics	Corticosteroids (In Eye Preparations)	93	812354	0.01%	59	139471	0.04%
04065500	11040200	Products Used Against Nausea And Vertigo - Domperidone & Metoclopramide	Other Anti-Inflammatory Eye Preparations (For The Eye)	93	812354	0.01%	55	139471	0.04%
05020100	13020102	Triazole Antifungals	Emollient Skin Preparations	93	812354	0.01%	45	139471	0.03%
12010151	13020102	Anti-Inflammatory Preparations	Emollient Skin Preparations	93	812354	0.01%	50	139471	0.04%
07020250	13040100	Preparations For Vaginal And Vulval Candidiasis	Topical Corticosteroids With Antimicrobials	93	812354	0.01%	38	139471	0.03%
06040103	13100400	Progestogen Products Doubling (In House Use)	Parasiticidal Preparations (Topical)	93	812354	0.01%	22	139471	0.02%
04070100	71580200	Non-Opioid And Compound Analgesics	Emollient Ointment	93	812354	0.01%	50	139471	0.04%
01020100	03010101	Antimuscarinics	Selective Beta 2 Agonists	92	812354	0.01%	70	139471	0.05%
01060200	04105100	Stimulant Laxatives	Substance Dependence - Nicotine Dependence	92	812354	0.01%	48	139471	0.03%
01030100	05010101	H2-Receptor Antagonists	Benzylpenicillin And Phenoxymethylpenicillin	92	812354	0.01%	38	139471	0.03%
04030100	05011100	Tricyclic And Related Antidepressants	Metronidazole And Tinidazole	92	812354	0.01%	67	139471	0.05%
01060400	05030201	Osmotic Laxatives	Herpes Simplex And Varicella-Zoster Infection	92	812354	0.01%	44	139471	0.03%
06040103	09010200	Progestogen Products Doubling (In House Use)	Drugs Used In Megaloblastic Anaemias	92	812354	0.01%	40	139471	0.03%
03010000	10010100	Bronchodilators	Non-Steroidal Anti-Inflammatory Drugs	92	812354	0.01%	56	139471	0.04%
04065500	13020100	Products Used Against Nausea And Vertigo - Domperidone & Metoclopramide	Emollients	92	812354	0.01%	41	139471	0.03%
11030100	13020100	Antibacterials (In Eye Preparation)	Emollients	92	812354	0.01%	43	139471	0.03%
03010101	13030000	Selective Beta 2 Agonists	Topical Local Anaesthetics And Antipruritics	92	812354	0.01%	53	139471	0.04%
01030500	02050501	Proton Pump Inhibitors	Angiotensin-Converting Enzyme Inhibitors (ACE Inhibitors)	91	812354	0.01%	80	139471	0.06%
01050200	03010300	Corticosteroids In Chronic Bowel Problems	Theophylline	91	812354	0.01%	67	139471	0.05%
04030400	04070300	Other Antidepressants	Neuropathic Pain	91	812354	0.01%	82	139471	0.06%
04030300	06010400	Selective Serotonin Re-Uptake Inhibitors (SSRI)	Treatment Of Hypoglycaemia	91	812354	0.01%	84	139471	0.06%
02090000	09050101	Antiplatelet Products	Calcium Supplements	91	812354	0.01%	43	139471	0.03%
01010201	09060200	Compound Alginate Preparations	Vitamin B Group	91	812354	0.01%	38	139471	0.03%
05011300	11030100	Urinary-Tract Infections	Antibacterials (In Eye Preparation)	91	812354	0.01%	30	139471	0.02%
09060700	12020101	Multivitamin And Multimineral Preparations	Corticosteroids Used In Nasal Allergy	91	812354	0.01%	46	139471	0.03%
05010500	13020103	Macrolides	Antimicrobial Emollients	91	812354	0.01%	46	139471	0.03%
04020000	13040000	Products Used In Psychoses And Related Disorders	Topical Corticosteroids	91	812354	0.01%	69	139471	0.05%
01020000	01020200	Antispasmodics And Products Affecting Motility	Other Antispasmodics	90	812354	0.01%	58	139471	0.04%
01040200	01050200	Antimotility Products	Corticosteroids In Chronic Bowel Problems	90	812354	0.01%	65	139471	0.05%
01040200	01060100	Antimotility Products	Bulk-Forming Laxatives	90	812354	0.01%	49	139471	0.04%
03010000	03030200	Bronchodilators	Leukotriene Receptor Antagonists	90	812354	0.01%	59	139471	0.04%
03010000	04010100	Bronchodilators	Hypnotics	90	812354	0.01%	65	139471	0.05%
01070200	05010101	Compound Haemorrhoid Products With Corticosteroids	Benzylpenicillin And Phenoxymethylpenicillin	90	812354	0.01%	34	139471	0.02%
06020100	06040101	Thyroid Hormones	Oestrogens And HRT	90	812354	0.01%	62	139471	0.04%
03030200	07020250	Leukotriene Receptor Antagonists	Preparations For Vaginal And Vulval Candidiasis	90	812354	0.01%	71	139471	0.05%
04030100	13020100	Tricyclic And Related Antidepressants	Emollients	90	812354	0.01%	70	139471	0.05%
01060100	13020100	Bulk-Forming Laxatives	Emollients	90	812354	0.01%	43	139471	0.03%
06040103	13020103	Progestogen Products Doubling (In House Use)	Antimicrobial Emollients	90	812354	0.01%	37	139471	0.03%
01050100	13040000	Aminosalicylates	Topical Corticosteroids	90	812354	0.01%	63	139471	0.05%
03020000	14040200	Corticosteroids (For Respiratory Conditions)	Vaccines And Antisera - Influenza Vaccines	90	812354	0.01%	41	139471	0.03%
13040000	15020000	Topical Corticosteroids	Local Anaesthesia	90	812354	0.01%	40	139471	0.03%
01030500	02120400	Proton Pump Inhibitors	Statins	89	812354	0.01%	84	139471	0.06%
02060200	05010103	Calcium-Channel Blockers	Broad-Spectrum Penicillins	89	812354	0.01%	65	139471	0.05%
05010800	06010101	Sulphonamides And Trimethoprim	Short-Acting Insulins	89	812354	0.01%	73	139471	0.05%
02050200	09010101	Centrally Acting Antihypertensive Products	Oral Iron	89	812354	0.01%	59	139471	0.04%
04010100	09020100	Hypnotics	Oral Preparations For Fluid And Electrolyte Imbalance	89	812354	0.01%	40	139471	0.03%
01060400	09060200	Osmotic Laxatives	Vitamin B Group	89	812354	0.01%	44	139471	0.03%
04070100	10010300	Non-Opioid And Compound Analgesics	Drugs That Suppress The Rheumatic Disease Process	89	812354	0.01%	65	139471	0.05%
04030300	12010100	Selective Serotonin Re-Uptake Inhibitors (SSRI)	Drugs Acting On The Ear - Otitis Externa	89	812354	0.01%	61	139471	0.04%
13050000	13090000	Preparations For Eczema And Psoriasis	Shampoos And Other Preparations For Scalp And Hair Conditions	89	812354	0.01%	39	139471	0.03%
01010201	13100400	Compound Alginate Preparations	Parasiticidal Preparations (Topical)	89	812354	0.01%	31	139471	0.02%
01030100	01040200	H2-Receptor Antagonists	Antimotility Products	88	812354	0.01%	54	139471	0.04%
01040200	02040000	Antimotility Products	Beta-Adrenoceptor Blockers	88	812354	0.01%	67	139471	0.05%
04020300	04030300	Products Used For Mania And Hypomania	Selective Serotonin Re-Uptake Inhibitors (SSRI)	88	812354	0.01%	79	139471	0.06%
01030500	04070402	Proton Pump Inhibitors	Prophylaxis Of Migraine	88	812354	0.01%	81	139471	0.06%
01020200	05010101	Other Antispasmodics	Benzylpenicillin And Phenoxymethylpenicillin	88	812354	0.01%	48	139471	0.03%
01070200	05010102	Compound Haemorrhoid Products With Corticosteroids	Penicillinase-Resistant Penicillins	88	812354	0.01%	31	139471	0.02%
03010200	05010103	Antimuscarinic Bronchodilators	Broad-Spectrum Penicillins	88	812354	0.01%	75	139471	0.05%
03040101	05030201	Non-Sedating Antihistamines	Herpes Simplex And Varicella-Zoster Infection	88	812354	0.01%	58	139471	0.04%
04060000	06010101	Products Used Against Nausea And Vertigo	Short-Acting Insulins	88	812354	0.01%	79	139471	0.06%
02050200	06010102	Centrally Acting Antihypertensive Products	Intermediate- And Long-Acting Insulins	88	812354	0.01%	80	139471	0.06%
01050300	09010101	Products Affecting The Immune Response In Chronic Bowel Problems	Oral Iron	88	812354	0.01%	62	139471	0.04%
03010101	09020100	Selective Beta 2 Agonists	Oral Preparations For Fluid And Electrolyte Imbalance	88	812354	0.01%	55	139471	0.04%
01030500	09060200	Proton Pump Inhibitors	Vitamin B Group	88	812354	0.01%	73	139471	0.05%
01050100	09060400	Aminosalicylates	Vitamin D	88	812354	0.01%	56	139471	0.04%
05010800	09060400	Sulphonamides And Trimethoprim	Vitamin D	88	812354	0.01%	47	139471	0.03%
04020101	09060700	First-Generation Antipsychotic Drugs	Multivitamin And Multimineral Preparations	88	812354	0.01%	44	139471	0.03%
03020000	09060700	Corticosteroids (For Respiratory Conditions)	Multivitamin And Multimineral Preparations	88	812354	0.01%	56	139471	0.04%
04020101	12030100	First-Generation Antipsychotic Drugs	Drugs For Oral Ulceration And Inflammation	88	812354	0.01%	34	139471	0.02%
02090000	13020100	Antiplatelet Products	Emollients	88	812354	0.01%	52	139471	0.04%
09060400	13020100	Vitamin D	Emollients	88	812354	0.01%	39	139471	0.03%
12010100	13040000	Drugs Acting On The Ear - Otitis Externa	Topical Corticosteroids	88	812354	0.01%	29	139471	0.02%
09020102	13040000	Oral Sodium And Water	Topical Corticosteroids	88	812354	0.01%	39	139471	0.03%
12010300	13040000	Drugs Acting On The Ear - Removal Of Ear Wax	Topical Corticosteroids	88	812354	0.01%	40	139471	0.03%
13020101	13100101	Emollient Bath Additives And Shower Preparations	Antibacterial Preparations Only Used Topically	88	812354	0.01%	46	139471	0.03%
13040000	14040200	Topical Corticosteroids	Vaccines And Antisera - Influenza Vaccines	88	812354	0.01%	52	139471	0.04%
13020100	71580200	Emollients	Emollient Ointment	88	812354	0.01%	47	139471	0.03%
01070000	03010101	Local Products For Anal Or Rectal Problems	Selective Beta 2 Agonists	87	812354	0.01%	62	139471	0.04%
03040101	04020102	Non-Sedating Antihistamines	Second-Generation Antipsychotic Drugs	87	812354	0.01%	85	139471	0.06%
01050200	04030400	Corticosteroids In Chronic Bowel Problems	Other Antidepressants	87	812354	0.01%	82	139471	0.06%
01010201	04050100	Compound Alginate Preparations	Anti-Obesity Products Acting On The Gastro-Intestinal Tract	87	812354	0.01%	50	139471	0.04%
04030400	04080100	Other Antidepressants	Control Of Epilepsy	87	812354	0.01%	81	139471	0.06%
02120400	05010103	Statins	Broad-Spectrum Penicillins	87	812354	0.01%	76	139471	0.05%
04060000	05030201	Products Used Against Nausea And Vertigo	Herpes Simplex And Varicella-Zoster Infection	87	812354	0.01%	30	139471	0.02%
07020200	07020250	Vaginal And Vulval Infections	Preparations For Vaginal And Vulval Candidiasis	87	812354	0.01%	31	139471	0.02%
04020000	09010101	Products Used In Psychoses And Related Disorders	Oral Iron	87	812354	0.01%	54	139471	0.04%
04020101	09010200	First-Generation Antipsychotic Drugs	Drugs Used In Megaloblastic Anaemias	87	812354	0.01%	39	139471	0.03%
06040103	09060700	Progestogen Products Doubling (In House Use)	Multivitamin And Multimineral Preparations	87	812354	0.01%	31	139471	0.02%
04030300	12010300	Selective Serotonin Re-Uptake Inhibitors (SSRI)	Drugs Acting On The Ear - Removal Of Ear Wax	87	812354	0.01%	58	139471	0.04%
04070100	12020250	Non-Opioid And Compound Analgesics	Sympathomimetics (Nasal Decongestants)	87	812354	0.01%	32	139471	0.02%
05011300	13020101	Urinary-Tract Infections	Emollient Bath Additives And Shower Preparations	87	812354	0.01%	48	139471	0.03%
06010102	13020102	Intermediate- And Long-Acting Insulins	Emollient Skin Preparations	87	812354	0.01%	74	139471	0.05%
10010100	13090000	Non-Steroidal Anti-Inflammatory Drugs	Shampoos And Other Preparations For Scalp And Hair Conditions	87	812354	0.01%	46	139471	0.03%
09010101	13100400	Oral Iron	Parasiticidal Preparations (Topical)	87	812354	0.01%	22	139471	0.02%
01060100	04010201	Bulk-Forming Laxatives	Benzodiazepines	86	812354	0.01%	62	139471	0.04%
04010200	04030300	Anxiolytics	Selective Serotonin Re-Uptake Inhibitors (SSRI)	86	812354	0.01%	65	139471	0.05%
04060000	04070300	Products Used Against Nausea And Vertigo	Neuropathic Pain	86	812354	0.01%	72	139471	0.05%
05010300	06020100	Tetracyclines	Thyroid Hormones	86	812354	0.01%	67	139471	0.05%
02090000	09010200	Antiplatelet Products	Drugs Used In Megaloblastic Anaemias	86	812354	0.01%	44	139471	0.03%
03040101	09010200	Non-Sedating Antihistamines	Drugs Used In Megaloblastic Anaemias	86	812354	0.01%	67	139471	0.05%
05010102	09060400	Penicillinase-Resistant Penicillins	Vitamin D	86	812354	0.01%	35	139471	0.03%
04105100	13020101	Substance Dependence - Nicotine Dependence	Emollient Bath Additives And Shower Preparations	86	812354	0.01%	38	139471	0.03%
04030300	13050200	Selective Serotonin Re-Uptake Inhibitors (SSRI)	Preparations For Psoriasis	86	812354	0.01%	67	139471	0.05%
04010100	13100101	Hypnotics	Antibacterial Preparations Only Used Topically	86	812354	0.01%	55	139471	0.04%
05010201	13100300	Cephalosporins	Antiviral Preparations (Topical	86	812354	0.01%	34	139471	0.02%
01010201	14040200	Compound Alginate Preparations	Vaccines And Antisera - Influenza Vaccines	86	812354	0.01%	36	139471	0.03%
04060000	14040200	Products Used Against Nausea And Vertigo	Vaccines And Antisera - Influenza Vaccines	86	812354	0.01%	25	139471	0.02%
14040500	14040800	Vaccines And Antisera - Hepatitis A Vaccine	Vaccines And Antisera - Diphtheria Vaccines	86	812354	0.01%	13	139471	0.01%
01010201	03030200	Compound Alginate Preparations	Leukotriene Receptor Antagonists	85	812354	0.01%	69	139471	0.05%
01060400	04080100	Osmotic Laxatives	Control Of Epilepsy	85	812354	0.01%	63	139471	0.05%
05010500	05011200	Macrolides	Quinolones	85	812354	0.01%	38	139471	0.03%
04070200	05020100	Opioid Analgesics	Triazole Antifungals	85	812354	0.01%	58	139471	0.04%
06010102	06010201	Intermediate- And Long-Acting Insulins	Sulphonylureas	85	812354	0.01%	58	139471	0.04%
05010102	06040102	Penicillinase-Resistant Penicillins	Progestogens And Progesterone Receptor Modulators	85	812354	0.01%	32	139471	0.02%
04010100	09020102	Hypnotics	Oral Sodium And Water	85	812354	0.01%	26	139471	0.02%
01030100	09060200	H2-Receptor Antagonists	Vitamin B Group	85	812354	0.01%	24	139471	0.02%
01020000	10010100	Antispasmodics And Products Affecting Motility	Non-Steroidal Anti-Inflammatory Drugs	85	812354	0.01%	45	139471	0.03%
04020101	13020101	First-Generation Antipsychotic Drugs	Emollient Bath Additives And Shower Preparations	85	812354	0.01%	47	139471	0.03%
02090000	13020101	Antiplatelet Products	Emollient Bath Additives And Shower Preparations	85	812354	0.01%	52	139471	0.04%
13040000	13060101	Topical Corticosteroids	Benzoyl Peroxide And Azelaic Acid For Acne	85	812354	0.01%	33	139471	0.02%
05010800	13060102	Sulphonamides And Trimethoprim	Topical Antibacterials For Acne	85	812354	0.01%	18	139471	0.01%
03040101	13100300	Non-Sedating Antihistamines	Antiviral Preparations (Topical	85	812354	0.01%	45	139471	0.03%
04030300	71580200	Selective Serotonin Re-Uptake Inhibitors (SSRI)	Emollient Ointment	85	812354	0.01%	64	139471	0.05%
01010201	01070100	Compound Alginate Preparations	Soothing Haemorrhoid Products	84	812354	0.01%	32	139471	0.02%
01040200	03040102	Antimotility Products	Sedating Antihistamines	84	812354	0.01%	52	139471	0.04%
03010000	03040102	Bronchodilators	Sedating Antihistamines	84	812354	0.01%	53	139471	0.04%
02040000	03040102	Beta-Adrenoceptor Blockers	Sedating Antihistamines	84	812354	0.01%	56	139471	0.04%
02120400	04030300	Statins	Selective Serotonin Re-Uptake Inhibitors (SSRI)	84	812354	0.01%	83	139471	0.06%
03030200	05010500	Leukotriene Receptor Antagonists	Macrolides	84	812354	0.01%	57	139471	0.04%
02050200	06010101	Centrally Acting Antihypertensive Products	Short-Acting Insulins	84	812354	0.01%	76	139471	0.05%
04060000	06010102	Products Used Against Nausea And Vertigo	Intermediate- And Long-Acting Insulins	84	812354	0.01%	73	139471	0.05%
04050100	06010202	Anti-Obesity Products Acting On The Gastro-Intestinal Tract	Biguanides (Metformin)	84	812354	0.01%	63	139471	0.05%
04070100	06010400	Non-Opioid And Compound Analgesics	Treatment Of Hypoglycaemia	84	812354	0.01%	68	139471	0.05%
04065600	09020100	Products Used Against Nausea And Vertigo - 5 HT3 Antagonists	Oral Preparations For Fluid And Electrolyte Imbalance	84	812354	0.01%	19	139471	0.01%
04010100	09060700	Hypnotics	Multivitamin And Multimineral Preparations	84	812354	0.01%	59	139471	0.04%
09010200	10010100	Drugs Used In Megaloblastic Anaemias	Non-Steroidal Anti-Inflammatory Drugs	84	812354	0.01%	44	139471	0.03%
09010101	11080100	Oral Iron	Tear Deficiency	84	812354	0.01%	40	139471	0.03%
06020100	12010151	Thyroid Hormones	Anti-Inflammatory Preparations	84	812354	0.01%	53	139471	0.04%
10030250	12020101	Topical Nsaids And Counter Irritants	Corticosteroids Used In Nasal Allergy	84	812354	0.01%	50	139471	0.04%
05010103	13050200	Broad-Spectrum Penicillins	Preparations For Psoriasis	84	812354	0.01%	43	139471	0.03%
05010500	13060101	Macrolides	Benzoyl Peroxide And Azelaic Acid For Acne	84	812354	0.01%	25	139471	0.02%
07020250	13070000	Preparations For Vaginal And Vulval Candidiasis	Preparations For Warts And Calluses	84	812354	0.01%	28	139471	0.02%
06040103	13090000	Progestogen Products Doubling (In House Use)	Shampoos And Other Preparations For Scalp And Hair Conditions	84	812354	0.01%	25	139471	0.02%
03020000	13090000	Corticosteroids (For Respiratory Conditions)	Shampoos And Other Preparations For Scalp And Hair Conditions	84	812354	0.01%	59	139471	0.04%
[truncated: 20,132 more rows]

## Sheet: AllTrimesters
Medications prescribed in pairs				All Pregnancies			Pregnancies of women with active multimorbidity
(BNF chapter and section)		Description		Numerator	Denominator	Estimated prescription percentage	Numerator	Denominator	Estimated prescription percentage
Drug 1	Drug 2	Drug1	Drug 2
01010201	09010101	Compound Alginate Preparations	Oral Iron	55695	774247	7.19%	12803	132391	9.67%
05010103	09010101	Broad-Spectrum Penicillins	Oral Iron	51713	774247	6.68%	12542	132391	9.47%
07020250	09010101	Preparations For Vaginal And Vulval Candidiasis	Oral Iron	49722	774247	6.42%	11724	132391	8.86%
05010103	07020250	Broad-Spectrum Penicillins	Preparations For Vaginal And Vulval Candidiasis	39844	774247	5.15%	11197	132391	8.46%
01010201	07020250	Compound Alginate Preparations	Preparations For Vaginal And Vulval Candidiasis	36474	774247	4.71%	9962	132391	7.52%
01010201	05010103	Compound Alginate Preparations	Broad-Spectrum Penicillins	36227	774247	4.68%	10312	132391	7.79%
04070100	09010101	Non-Opioid And Compound Analgesics	Oral Iron	35743	774247	4.62%	10149	132391	7.67%
04070100	05010103	Non-Opioid And Compound Analgesics	Broad-Spectrum Penicillins	30413	774247	3.93%	9797	132391	7.40%
01010201	04070100	Compound Alginate Preparations	Non-Opioid And Compound Analgesics	28938	774247	3.74%	9295	132391	7.02%
04070100	07020250	Non-Opioid And Compound Analgesics	Preparations For Vaginal And Vulval Candidiasis	24662	774247	3.19%	8213	132391	6.20%
01060400	09010101	Osmotic Laxatives	Oral Iron	23116	774247	2.99%	6414	132391	4.84%
09010101	13040000	Oral Iron	Topical Corticosteroids	22230	774247	2.87%	6384	132391	4.82%
05010201	09010101	Cephalosporins	Oral Iron	21621	774247	2.79%	5270	132391	3.98%
03010101	05010103	Selective Beta 2 Agonists	Broad-Spectrum Penicillins	20648	774247	2.67%	9375	132391	7.08%
03010101	03020000	Selective Beta 2 Agonists	Corticosteroids (For Respiratory Conditions)	20250	774247	2.62%	9239	132391	6.98%
05010201	07020250	Cephalosporins	Preparations For Vaginal And Vulval Candidiasis	19240	774247	2.48%	5376	132391	4.06%
05010103	05010201	Broad-Spectrum Penicillins	Cephalosporins	19048	774247	2.46%	5309	132391	4.01%
01010201	01060400	Compound Alginate Preparations	Osmotic Laxatives	18628	774247	2.41%	5773	132391	4.36%
07020250	13040000	Preparations For Vaginal And Vulval Candidiasis	Topical Corticosteroids	18054	774247	2.33%	5717	132391	4.32%
03010101	09010101	Selective Beta 2 Agonists	Oral Iron	17898	774247	2.31%	7845	132391	5.93%
01010201	13040000	Compound Alginate Preparations	Topical Corticosteroids	16565	774247	2.14%	5462	132391	4.13%
05010103	13040000	Broad-Spectrum Penicillins	Topical Corticosteroids	16139	774247	2.08%	5542	132391	4.19%
01010201	05010201	Compound Alginate Preparations	Cephalosporins	15373	774247	1.99%	4439	132391	3.35%
01060400	07020250	Osmotic Laxatives	Preparations For Vaginal And Vulval Candidiasis	15202	774247	1.96%	4938	132391	3.73%
01010201	03010101	Compound Alginate Preparations	Selective Beta 2 Agonists	14720	774247	1.90%	7078	132391	5.35%
01060400	05010103	Osmotic Laxatives	Broad-Spectrum Penicillins	14702	774247	1.90%	4911	132391	3.71%
13020102	13040000	Emollient Skin Preparations	Topical Corticosteroids	14531	774247	1.88%	4838	132391	3.65%
04030300	09010101	Selective Serotonin Re-Uptake Inhibitors (SSRI)	Oral Iron	13636	774247	1.76%	8272	132391	6.25%
03010101	07020250	Selective Beta 2 Agonists	Preparations For Vaginal And Vulval Candidiasis	13352	774247	1.72%	6579	132391	4.97%
01060400	04070100	Osmotic Laxatives	Non-Opioid And Compound Analgesics	13188	774247	1.70%	4768	132391	3.60%
04070100	05010201	Non-Opioid And Compound Analgesics	Cephalosporins	12997	774247	1.68%	4193	132391	3.17%
04060000	09010101	Products Used Against Nausea And Vertigo	Oral Iron	11449	774247	1.48%	3372	132391	2.55%
04070100	13040000	Non-Opioid And Compound Analgesics	Topical Corticosteroids	11440	774247	1.48%	4411	132391	3.33%
03010101	04070100	Selective Beta 2 Agonists	Non-Opioid And Compound Analgesics	11286	774247	1.46%	6105	132391	4.61%
09010101	13020102	Oral Iron	Emollient Skin Preparations	11032	774247	1.42%	3246	132391	2.45%
09010101	12020101	Oral Iron	Corticosteroids Used In Nasal Allergy	10659	774247	1.38%	3773	132391	2.85%
04030300	05010103	Selective Serotonin Re-Uptake Inhibitors (SSRI)	Broad-Spectrum Penicillins	10404	774247	1.34%	6762	132391	5.11%
05010103	12020101	Broad-Spectrum Penicillins	Corticosteroids Used In Nasal Allergy	10026	774247	1.29%	3923	132391	2.96%
04030300	07020250	Selective Serotonin Re-Uptake Inhibitors (SSRI)	Preparations For Vaginal And Vulval Candidiasis	9507	774247	1.23%	6157	132391	4.65%
01010201	04030300	Compound Alginate Preparations	Selective Serotonin Re-Uptake Inhibitors (SSRI)	9363	774247	1.21%	6100	132391	4.61%
03020000	05010103	Corticosteroids (For Respiratory Conditions)	Broad-Spectrum Penicillins	9238	774247	1.19%	4374	132391	3.30%
04030300	04070100	Selective Serotonin Re-Uptake Inhibitors (SSRI)	Non-Opioid And Compound Analgesics	9142	774247	1.18%	6142	132391	4.64%
01010201	12020101	Compound Alginate Preparations	Corticosteroids Used In Nasal Allergy	8926	774247	1.15%	3498	132391	2.64%
11040200	12020101	Other Anti-Inflammatory Eye Preparations (For The Eye)	Corticosteroids Used In Nasal Allergy	8863	774247	1.14%	2863	132391	2.16%
01070200	09010101	Compound Haemorrhoid Products With Corticosteroids	Oral Iron	8745	774247	1.13%	2340	132391	1.77%
03010101	13040000	Selective Beta 2 Agonists	Topical Corticosteroids	8634	774247	1.12%	4863	132391	3.67%
01010201	01030100	Compound Alginate Preparations	H2-Receptor Antagonists	8503	774247	1.10%	2901	132391	2.19%
04060000	05010103	Products Used Against Nausea And Vertigo	Broad-Spectrum Penicillins	8493	774247	1.10%	2964	132391	2.24%
01010201	13020102	Compound Alginate Preparations	Emollient Skin Preparations	8373	774247	1.08%	2780	132391	2.10%
03020000	09010101	Corticosteroids (For Respiratory Conditions)	Oral Iron	8177	774247	1.06%	3709	132391	2.80%
01010201	04060000	Compound Alginate Preparations	Products Used Against Nausea And Vertigo	8003	774247	1.03%	2657	132391	2.01%
07020250	13020102	Preparations For Vaginal And Vulval Candidiasis	Emollient Skin Preparations	7984	774247	1.03%	2742	132391	2.07%
01010201	01030500	Compound Alginate Preparations	Proton Pump Inhibitors	7874	774247	1.02%	3275	132391	2.47%
04070100	10010100	Non-Opioid And Compound Analgesics	Non-Steroidal Anti-Inflammatory Drugs	7825	774247	1.01%	2753	132391	2.08%
05010103	13020102	Broad-Spectrum Penicillins	Emollient Skin Preparations	7707	774247	1.00%	2747	132391	2.07%
05010102	09010101	Penicillinase-Resistant Penicillins	Oral Iron	7659	774247	0.99%	2055	132391	1.55%
05011300	09010101	Urinary-Tract Infections	Oral Iron	7610	774247	0.98%	2114	132391	1.60%
01010201	01070200	Compound Alginate Preparations	Compound Haemorrhoid Products With Corticosteroids	7580	774247	0.98%	2256	132391	1.70%
07020250	12020101	Preparations For Vaginal And Vulval Candidiasis	Corticosteroids Used In Nasal Allergy	7580	774247	0.98%	3084	132391	2.33%
01030500	09010101	Proton Pump Inhibitors	Oral Iron	7543	774247	0.97%	3190	132391	2.41%
06040103	09010101	Progestogen Products Doubling (In House Use)	Oral Iron	7527	774247	0.97%	1487	132391	1.12%
05010500	09010101	Macrolides	Oral Iron	7421	774247	0.96%	2217	132391	1.67%
04020101	09010101	First-Generation Antipsychotic Drugs	Oral Iron	7416	774247	0.96%	2221	132391	1.68%
05010101	09010101	Benzylpenicillin And Phenoxymethylpenicillin	Oral Iron	7403	774247	0.96%	1746	132391	1.32%
04060000	07020250	Products Used Against Nausea And Vertigo	Preparations For Vaginal And Vulval Candidiasis	7216	774247	0.93%	2495	132391	1.88%
01030100	09010101	H2-Receptor Antagonists	Oral Iron	7175	774247	0.93%	2413	132391	1.82%
03040102	09010101	Sedating Antihistamines	Oral Iron	7130	774247	0.92%	2082	132391	1.57%
01070200	07020250	Compound Haemorrhoid Products With Corticosteroids	Preparations For Vaginal And Vulval Candidiasis	7112	774247	0.92%	2089	132391	1.58%
13020100	13040000	Emollients	Topical Corticosteroids	7048	774247	0.91%	2229	132391	1.68%
03010101	12020101	Selective Beta 2 Agonists	Corticosteroids Used In Nasal Allergy	7044	774247	0.91%	4162	132391	3.14%
04065400	09010101	Products Used Against Nausea And Vertigo - Antihistamines	Oral Iron	7015	774247	0.91%	2029	132391	1.53%
01060400	01070200	Osmotic Laxatives	Compound Haemorrhoid Products With Corticosteroids	6982	774247	0.90%	2072	132391	1.57%
01060400	13040000	Osmotic Laxatives	Topical Corticosteroids	6974	774247	0.90%	2629	132391	1.99%
09010101	13020100	Oral Iron	Emollients	6953	774247	0.90%	1857	132391	1.40%
01010201	03020000	Compound Alginate Preparations	Corticosteroids (For Respiratory Conditions)	6942	774247	0.90%	3476	132391	2.63%
05010102	05010103	Penicillinase-Resistant Penicillins	Broad-Spectrum Penicillins	6934	774247	0.90%	2357	132391	1.78%
05010103	05011300	Broad-Spectrum Penicillins	Urinary-Tract Infections	6809	774247	0.88%	2064	132391	1.56%
04060000	04070100	Products Used Against Nausea And Vertigo	Non-Opioid And Compound Analgesics	6778	774247	0.88%	2661	132391	2.01%
05011300	07020250	Urinary-Tract Infections	Preparations For Vaginal And Vulval Candidiasis	6678	774247	0.86%	2128	132391	1.61%
01060400	05010201	Osmotic Laxatives	Cephalosporins	6637	774247	0.86%	2281	132391	1.72%
05010201	13040000	Cephalosporins	Topical Corticosteroids	6596	774247	0.85%	2295	132391	1.73%
05010102	07020250	Penicillinase-Resistant Penicillins	Preparations For Vaginal And Vulval Candidiasis	6583	774247	0.85%	1960	132391	1.48%
05010101	05010103	Benzylpenicillin And Phenoxymethylpenicillin	Broad-Spectrum Penicillins	6397	774247	0.83%	1866	132391	1.41%
03010101	05010201	Selective Beta 2 Agonists	Cephalosporins	6393	774247	0.83%	3152	132391	2.38%
02090000	09010101	Antiplatelet Products	Oral Iron	6391	774247	0.83%	2271	132391	1.72%
05010101	07020250	Benzylpenicillin And Phenoxymethylpenicillin	Preparations For Vaginal And Vulval Candidiasis	6293	774247	0.81%	1681	132391	1.27%
03020000	07020250	Corticosteroids (For Respiratory Conditions)	Preparations For Vaginal And Vulval Candidiasis	6252	774247	0.81%	3112	132391	2.35%
03040101	09010101	Non-Sedating Antihistamines	Oral Iron	6244	774247	0.81%	2364	132391	1.79%
05010500	07020250	Macrolides	Preparations For Vaginal And Vulval Candidiasis	6229	774247	0.80%	2074	132391	1.57%
04070100	12020101	Non-Opioid And Compound Analgesics	Corticosteroids Used In Nasal Allergy	6167	774247	0.80%	2744	132391	2.07%
09010101	10010100	Oral Iron	Non-Steroidal Anti-Inflammatory Drugs	6160	774247	0.80%	1847	132391	1.40%
01070200	05010103	Compound Haemorrhoid Products With Corticosteroids	Broad-Spectrum Penicillins	6123	774247	0.79%	1966	132391	1.48%
01030500	05010103	Proton Pump Inhibitors	Broad-Spectrum Penicillins	6108	774247	0.79%	2840	132391	2.15%
01030500	04070100	Proton Pump Inhibitors	Non-Opioid And Compound Analgesics	6062	774247	0.78%	3071	132391	2.32%
05010800	09010101	Sulphonamides And Trimethoprim	Oral Iron	6035	774247	0.78%	1545	132391	1.17%
01060100	09010101	Bulk-Forming Laxatives	Oral Iron	5950	774247	0.77%	1759	132391	1.33%
04070100	13020102	Non-Opioid And Compound Analgesics	Emollient Skin Preparations	5812	774247	0.75%	2258	132391	1.71%
05010103	05010500	Broad-Spectrum Penicillins	Macrolides	5772	774247	0.75%	1960	132391	1.48%
01010201	04020101	Compound Alginate Preparations	First-Generation Antipsychotic Drugs	5767	774247	0.74%	1941	132391	1.47%
01010201	05010500	Compound Alginate Preparations	Macrolides	5746	774247	0.74%	2046	132391	1.55%
05010103	06040103	Broad-Spectrum Penicillins	Progestogen Products Doubling (In House Use)	5681	774247	0.73%	1393	132391	1.05%
05010103	05010800	Broad-Spectrum Penicillins	Sulphonamides And Trimethoprim	5579	774247	0.72%	1708	132391	1.29%
01010201	01060100	Compound Alginate Preparations	Bulk-Forming Laxatives	5568	774247	0.72%	1816	132391	1.37%
01050200	03010101	Corticosteroids In Chronic Bowel Problems	Selective Beta 2 Agonists	5563	774247	0.72%	3071	132391	2.32%
01060400	03010101	Osmotic Laxatives	Selective Beta 2 Agonists	5557	774247	0.72%	3026	132391	2.29%
04020101	05010103	First-Generation Antipsychotic Drugs	Broad-Spectrum Penicillins	5557	774247	0.72%	1970	132391	1.49%
01010201	13020100	Compound Alginate Preparations	Emollients	5544	774247	0.72%	1707	132391	1.29%
01010201	03040102	Compound Alginate Preparations	Sedating Antihistamines	5531	774247	0.71%	1824	132391	1.38%
09010101	11040200	Oral Iron	Other Anti-Inflammatory Eye Preparations (For The Eye)	5500	774247	0.71%	1660	132391	1.25%
01030100	05010103	H2-Receptor Antagonists	Broad-Spectrum Penicillins	5499	774247	0.71%	2120	132391	1.60%
01010201	05010102	Compound Alginate Preparations	Penicillinase-Resistant Penicillins	5371	774247	0.69%	1651	132391	1.25%
01010201	04065400	Compound Alginate Preparations	Products Used Against Nausea And Vertigo - Antihistamines	5361	774247	0.69%	1726	132391	1.30%
04070100	05010500	Non-Opioid And Compound Analgesics	Macrolides	5359	774247	0.69%	2112	132391	1.60%
04065500	09010101	Products Used Against Nausea And Vertigo - Domperidone & Metoclopramide	Oral Iron	5352	774247	0.69%	1597	132391	1.21%
13020101	13040000	Emollient Bath Additives And Shower Preparations	Topical Corticosteroids	5257	774247	0.68%	2072	132391	1.57%
01010201	05010101	Compound Alginate Preparations	Benzylpenicillin And Phenoxymethylpenicillin	5253	774247	0.68%	1410	132391	1.07%
01030500	07020250	Proton Pump Inhibitors	Preparations For Vaginal And Vulval Candidiasis	5249	774247	0.68%	2485	132391	1.88%
05010800	07020250	Sulphonamides And Trimethoprim	Preparations For Vaginal And Vulval Candidiasis	5246	774247	0.68%	1633	132391	1.23%
05010103	10010100	Broad-Spectrum Penicillins	Non-Steroidal Anti-Inflammatory Drugs	5243	774247	0.68%	1808	132391	1.37%
06020100	09010101	Thyroid Hormones	Oral Iron	5239	774247	0.68%	3009	132391	2.27%
04065400	05010103	Products Used Against Nausea And Vertigo - Antihistamines	Broad-Spectrum Penicillins	5232	774247	0.68%	1783	132391	1.35%
03010101	04030300	Selective Beta 2 Agonists	Selective Serotonin Re-Uptake Inhibitors (SSRI)	5206	774247	0.67%	4245	132391	3.21%
01070000	09010101	Local Products For Anal Or Rectal Problems	Oral Iron	5151	774247	0.67%	1294	132391	0.98%
03040101	05010103	Non-Sedating Antihistamines	Broad-Spectrum Penicillins	5145	774247	0.66%	2299	132391	1.74%
03040102	05010103	Sedating Antihistamines	Broad-Spectrum Penicillins	5108	774247	0.66%	1789	132391	1.35%
03040102	13040000	Sedating Antihistamines	Topical Corticosteroids	5107	774247	0.66%	1706	132391	1.29%
06040103	07020250	Progestogen Products Doubling (In House Use)	Preparations For Vaginal And Vulval Candidiasis	5041	774247	0.65%	1202	132391	0.91%
09010101	11030100	Oral Iron	Antibacterials (In Eye Preparation)	5032	774247	0.65%	1119	132391	0.85%
07020250	13020100	Preparations For Vaginal And Vulval Candidiasis	Emollients	5017	774247	0.65%	1600	132391	1.21%
04105100	09010101	Substance Dependence - Nicotine Dependence	Oral Iron	5007	774247	0.65%	1375	132391	1.04%
01010201	03040101	Compound Alginate Preparations	Non-Sedating Antihistamines	4959	774247	0.64%	2136	132391	1.61%
03020000	04070100	Corticosteroids (For Respiratory Conditions)	Non-Opioid And Compound Analgesics	4924	774247	0.64%	2758	132391	2.08%
04070100	05010102	Non-Opioid And Compound Analgesics	Penicillinase-Resistant Penicillins	4902	774247	0.63%	1754	132391	1.32%
03040101	12020101	Non-Sedating Antihistamines	Corticosteroids Used In Nasal Allergy	4897	774247	0.63%	2387	132391	1.80%
01040200	04070100	Antimotility Products	Non-Opioid And Compound Analgesics	4892	774247	0.63%	2055	132391	1.55%
04020101	07020250	First-Generation Antipsychotic Drugs	Preparations For Vaginal And Vulval Candidiasis	4878	774247	0.63%	1702	132391	1.29%
06010101	06010102	Short-Acting Insulins	Intermediate- And Long-Acting Insulins	4876	774247	0.63%	2898	132391	2.19%
03040102	07020250	Sedating Antihistamines	Preparations For Vaginal And Vulval Candidiasis	4830	774247	0.62%	1708	132391	1.29%
13020101	13020102	Emollient Bath Additives And Shower Preparations	Emollient Skin Preparations	4811	774247	0.62%	1742	132391	1.32%
04070100	05010101	Non-Opioid And Compound Analgesics	Benzylpenicillin And Phenoxymethylpenicillin	4807	774247	0.62%	1482	132391	1.12%
01030100	04070100	H2-Receptor Antagonists	Non-Opioid And Compound Analgesics	4806	774247	0.62%	2017	132391	1.52%
04020101	04070100	First-Generation Antipsychotic Drugs	Non-Opioid And Compound Analgesics	4795	774247	0.62%	1850	132391	1.40%
01050200	05010103	Corticosteroids In Chronic Bowel Problems	Broad-Spectrum Penicillins	4769	774247	0.62%	2473	132391	1.87%
01030100	07020250	H2-Receptor Antagonists	Preparations For Vaginal And Vulval Candidiasis	4764	774247	0.62%	1842	132391	1.39%
03010101	13020102	Selective Beta 2 Agonists	Emollient Skin Preparations	4726	774247	0.61%	2743	132391	2.07%
03010101	03040101	Selective Beta 2 Agonists	Non-Sedating Antihistamines	4701	774247	0.61%	2953	132391	2.23%
05011100	07020250	Metronidazole And Tinidazole	Preparations For Vaginal And Vulval Candidiasis	4688	774247	0.61%	1249	132391	0.94%
01010201	01070000	Compound Alginate Preparations	Local Products For Anal Or Rectal Problems	4679	774247	0.60%	1252	132391	0.95%
01010201	05011300	Compound Alginate Preparations	Urinary-Tract Infections	4677	774247	0.60%	1518	132391	1.15%
12020101	13040000	Corticosteroids Used In Nasal Allergy	Topical Corticosteroids	4621	774247	0.60%	2161	132391	1.63%
01040200	09010101	Antimotility Products	Oral Iron	4619	774247	0.60%	1724	132391	1.30%
01060100	01060400	Bulk-Forming Laxatives	Osmotic Laxatives	4598	774247	0.59%	1545	132391	1.17%
04065400	07020250	Products Used Against Nausea And Vertigo - Antihistamines	Preparations For Vaginal And Vulval Candidiasis	4597	774247	0.59%	1544	132391	1.17%
01070200	04070100	Compound Haemorrhoid Products With Corticosteroids	Non-Opioid And Compound Analgesics	4590	774247	0.59%	1676	132391	1.27%
01010201	10010100	Compound Alginate Preparations	Non-Steroidal Anti-Inflammatory Drugs	4581	774247	0.59%	1598	132391	1.21%
03040101	13040000	Non-Sedating Antihistamines	Topical Corticosteroids	4554	774247	0.59%	2036	132391	1.54%
04030300	13040000	Selective Serotonin Re-Uptake Inhibitors (SSRI)	Topical Corticosteroids	4542	774247	0.59%	3101	132391	2.34%
05010102	13040000	Penicillinase-Resistant Penicillins	Topical Corticosteroids	4531	774247	0.59%	1625	132391	1.23%
01060400	04030300	Osmotic Laxatives	Selective Serotonin Re-Uptake Inhibitors (SSRI)	4508	774247	0.58%	3123	132391	2.36%
01010201	11040200	Compound Alginate Preparations	Other Anti-Inflammatory Eye Preparations (For The Eye)	4470	774247	0.58%	1554	132391	1.17%
02090000	05010103	Antiplatelet Products	Broad-Spectrum Penicillins	4466	774247	0.58%	1803	132391	1.36%
01010201	06040103	Compound Alginate Preparations	Progestogen Products Doubling (In House Use)	4448	774247	0.57%	1081	132391	0.82%
03040101	07020250	Non-Sedating Antihistamines	Preparations For Vaginal And Vulval Candidiasis	4425	774247	0.57%	1907	132391	1.44%
05010103	11030100	Broad-Spectrum Penicillins	Antibacterials (In Eye Preparation)	4404	774247	0.57%	1194	132391	0.90%
04065400	04070100	Products Used Against Nausea And Vertigo - Antihistamines	Non-Opioid And Compound Analgesics	4377	774247	0.57%	1642	132391	1.24%
01070000	07020250	Local Products For Anal Or Rectal Problems	Preparations For Vaginal And Vulval Candidiasis	4369	774247	0.56%	1196	132391	0.90%
04070100	05011300	Non-Opioid And Compound Analgesics	Urinary-Tract Infections	4356	774247	0.56%	1652	132391	1.25%
03010101	05010500	Selective Beta 2 Agonists	Macrolides	4351	774247	0.56%	2241	132391	1.69%
04070100	04070200	Non-Opioid And Compound Analgesics	Opioid Analgesics	4342	774247	0.56%	2366	132391	1.79%
05010103	13020100	Broad-Spectrum Penicillins	Emollients	4342	774247	0.56%	1456	132391	1.10%
01010201	04065500	Compound Alginate Preparations	Products Used Against Nausea And Vertigo - Domperidone & Metoclopramide	4306	774247	0.56%	1481	132391	1.12%
04030300	05010201	Selective Serotonin Re-Uptake Inhibitors (SSRI)	Cephalosporins	4296	774247	0.55%	2752	132391	2.08%
01060200	01060400	Stimulant Laxatives	Osmotic Laxatives	4286	774247	0.55%	1587	132391	1.20%
01010201	04105100	Compound Alginate Preparations	Substance Dependence - Nicotine Dependence	4278	774247	0.55%	1324	132391	1.00%
07020250	10010100	Preparations For Vaginal And Vulval Candidiasis	Non-Steroidal Anti-Inflammatory Drugs	4269	774247	0.55%	1483	132391	1.12%
04070100	06040103	Non-Opioid And Compound Analgesics	Progestogen Products Doubling (In House Use)	4268	774247	0.55%	1261	132391	0.95%
01060100	07020250	Bulk-Forming Laxatives	Preparations For Vaginal And Vulval Candidiasis	4246	774247	0.55%	1410	132391	1.07%
04105100	05010103	Substance Dependence - Nicotine Dependence	Broad-Spectrum Penicillins	4231	774247	0.55%	1449	132391	1.09%
04020101	04060000	First-Generation Antipsychotic Drugs	Products Used Against Nausea And Vertigo	4221	774247	0.55%	1404	132391	1.06%
01040200	05010103	Antimotility Products	Broad-Spectrum Penicillins	4209	774247	0.54%	1720	132391	1.30%
01060400	04060000	Osmotic Laxatives	Products Used Against Nausea And Vertigo	4201	774247	0.54%	1622	132391	1.23%
03040102	04070100	Sedating Antihistamines	Non-Opioid And Compound Analgesics	4177	774247	0.54%	1684	132391	1.27%
04060000	04065400	Products Used Against Nausea And Vertigo	Products Used Against Nausea And Vertigo - Antihistamines	4143	774247	0.54%	1364	132391	1.03%
04065500	05010103	Products Used Against Nausea And Vertigo - Domperidone & Metoclopramide	Broad-Spectrum Penicillins	4100	774247	0.53%	1466	132391	1.11%
09010101	13100101	Oral Iron	Antibacterial Preparations Only Used Topically	4090	774247	0.53%	1128	132391	0.85%
04060000	05010201	Products Used Against Nausea And Vertigo	Cephalosporins	4088	774247	0.53%	1412	132391	1.07%
03040101	04070100	Non-Sedating Antihistamines	Non-Opioid And Compound Analgesics	4081	774247	0.53%	2036	132391	1.54%
05011100	09010101	Metronidazole And Tinidazole	Oral Iron	4081	774247	0.53%	1019	132391	0.77%
03020000	13040000	Corticosteroids (For Respiratory Conditions)	Topical Corticosteroids	4060	774247	0.52%	2310	132391	1.74%
05010201	05011300	Cephalosporins	Urinary-Tract Infections	4021	774247	0.52%	1182	132391	0.89%
01010201	02090000	Compound Alginate Preparations	Antiplatelet Products	4009	774247	0.52%	1573	132391	1.19%
01060100	05010103	Bulk-Forming Laxatives	Broad-Spectrum Penicillins	4001	774247	0.52%	1408	132391	1.06%
09010101	09010200	Oral Iron	Drugs Used In Megaloblastic Anaemias	3978	774247	0.51%	1270	132391	0.96%
01010201	05010800	Compound Alginate Preparations	Sulphonamides And Trimethoprim	3946	774247	0.51%	1187	132391	0.90%
04105100	07020250	Substance Dependence - Nicotine Dependence	Preparations For Vaginal And Vulval Candidiasis	3910	774247	0.51%	1291	132391	0.98%
05010103	11040200	Broad-Spectrum Penicillins	Other Anti-Inflammatory Eye Preparations (For The Eye)	3910	774247	0.51%	1416	132391	1.07%
02090000	07020250	Antiplatelet Products	Preparations For Vaginal And Vulval Candidiasis	3872	774247	0.50%	1554	132391	1.17%
04070100	13020100	Non-Opioid And Compound Analgesics	Emollients	3846	774247	0.50%	1370	132391	1.03%
01010201	01040200	Compound Alginate Preparations	Antimotility Products	3798	774247	0.49%	1541	132391	1.16%
09010101	09060400	Oral Iron	Vitamin D	3795	774247	0.49%	1122	132391	0.85%
01010101	09010101	Aluminium- And Magnesium- Containing Antacids	Oral Iron	3748	774247	0.48%	855	132391	0.65%
07020250	11040200	Preparations For Vaginal And Vulval Candidiasis	Other Anti-Inflammatory Eye Preparations (For The Eye)	3741	774247	0.48%	1354	132391	1.02%
04070100	05010800	Non-Opioid And Compound Analgesics	Sulphonamides And Trimethoprim	3710	774247	0.48%	1376	132391	1.04%
01010201	11030100	Compound Alginate Preparations	Antibacterials (In Eye Preparation)	3680	774247	0.48%	967	132391	0.73%
01060400	01070000	Osmotic Laxatives	Local Products For Anal Or Rectal Problems	3652	774247	0.47%	1022	132391	0.77%
04010100	09010101	Hypnotics	Oral Iron	3638	774247	0.47%	1611	132391	1.22%
01060400	12020101	Osmotic Laxatives	Corticosteroids Used In Nasal Allergy	3636	774247	0.47%	1620	132391	1.22%
04030300	04060000	Selective Serotonin Re-Uptake Inhibitors (SSRI)	Products Used Against Nausea And Vertigo	3630	774247	0.47%	2479	132391	1.87%
01040200	07020250	Antimotility Products	Preparations For Vaginal And Vulval Candidiasis	3590	774247	0.46%	1523	132391	1.15%
07020250	11030100	Preparations For Vaginal And Vulval Candidiasis	Antibacterials (In Eye Preparation)	3586	774247	0.46%	1008	132391	0.76%
01060400	13020102	Osmotic Laxatives	Emollient Skin Preparations	3551	774247	0.46%	1345	132391	1.02%
04060000	04065500	Products Used Against Nausea And Vertigo	Products Used Against Nausea And Vertigo - Domperidone & Metoclopramide	3532	774247	0.46%	1210	132391	0.91%
04065500	04070100	Products Used Against Nausea And Vertigo - Domperidone & Metoclopramide	Non-Opioid And Compound Analgesics	3508	774247	0.45%	1363	132391	1.03%
04065500	07020250	Products Used Against Nausea And Vertigo - Domperidone & Metoclopramide	Preparations For Vaginal And Vulval Candidiasis	3484	774247	0.45%	1259	132391	0.95%
05010103	05011100	Broad-Spectrum Penicillins	Metronidazole And Tinidazole	3469	774247	0.45%	1013	132391	0.77%
01060100	04070100	Bulk-Forming Laxatives	Non-Opioid And Compound Analgesics	3463	774247	0.45%	1339	132391	1.01%
05010201	05010500	Cephalosporins	Macrolides	3459	774247	0.45%	1249	132391	0.94%
05010201	05010800	Cephalosporins	Sulphonamides And Trimethoprim	3456	774247	0.45%	1006	132391	0.76%
09010101	13020101	Oral Iron	Emollient Bath Additives And Shower Preparations	3456	774247	0.45%	1183	132391	0.89%
03010101	04060000	Selective Beta 2 Agonists	Products Used Against Nausea And Vertigo	3438	774247	0.44%	1916	132391	1.45%
02090000	04070100	Antiplatelet Products	Non-Opioid And Compound Analgesics	3432	774247	0.44%	1600	132391	1.21%
07020250	13100101	Preparations For Vaginal And Vulval Candidiasis	Antibacterial Preparations Only Used Topically	3427	774247	0.44%	1083	132391	0.82%
05010103	13100101	Broad-Spectrum Penicillins	Antibacterial Preparations Only Used Topically	3393	774247	0.44%	1103	132391	0.83%
05010103	06020100	Broad-Spectrum Penicillins	Thyroid Hormones	3385	774247	0.44%	2131	132391	1.61%
03020000	12020101	Corticosteroids (For Respiratory Conditions)	Corticosteroids Used In Nasal Allergy	3374	774247	0.44%	2068	132391	1.56%
01030500	01060400	Proton Pump Inhibitors	Osmotic Laxatives	3357	774247	0.43%	1694	132391	1.28%
04070200	09010101	Opioid Analgesics	Oral Iron	3325	774247	0.43%	1574	132391	1.19%
04070100	04105100	Non-Opioid And Compound Analgesics	Substance Dependence - Nicotine Dependence	3290	774247	0.42%	1264	132391	0.95%
01070200	13040000	Compound Haemorrhoid Products With Corticosteroids	Topical Corticosteroids	3286	774247	0.42%	1136	132391	0.86%
01070000	05010103	Local Products For Anal Or Rectal Problems	Broad-Spectrum Penicillins	3285	774247	0.42%	980	132391	0.74%
09010101	14040800	Oral Iron	Vaccines And Antisera - Diphtheria Vaccines	3275	774247	0.42%	749	132391	0.57%
03040101	11040200	Non-Sedating Antihistamines	Other Anti-Inflammatory Eye Preparations (For The Eye)	3251	774247	0.42%	1382	132391	1.04%
03010101	11040200	Selective Beta 2 Agonists	Other Anti-Inflammatory Eye Preparations (For The Eye)	3246	774247	0.42%	1707	132391	1.29%
01030500	03010101	Proton Pump Inhibitors	Selective Beta 2 Agonists	3238	774247	0.42%	2138	132391	1.61%
05010201	12020101	Cephalosporins	Corticosteroids Used In Nasal Allergy	3229	774247	0.42%	1367	132391	1.03%
04060000	13040000	Products Used Against Nausea And Vertigo	Topical Corticosteroids	3202	774247	0.41%	1284	132391	0.97%
01030100	04060000	H2-Receptor Antagonists	Products Used Against Nausea And Vertigo	3201	774247	0.41%	1188	132391	0.90%
05010500	13040000	Macrolides	Topical Corticosteroids	3186	774247	0.41%	1260	132391	0.95%
03010101	03040102	Selective Beta 2 Agonists	Sedating Antihistamines	3132	774247	0.40%	1718	132391	1.30%
03040102	13020102	Sedating Antihistamines	Emollient Skin Preparations	3113	774247	0.40%	1065	132391	0.80%
01010201	13100101	Compound Alginate Preparations	Antibacterial Preparations Only Used Topically	3113	774247	0.40%	995	132391	0.75%
01010101	01010201	Aluminium- And Magnesium- Containing Antacids	Compound Alginate Preparations	3087	774247	0.40%	821	132391	0.62%
01050200	09010101	Corticosteroids In Chronic Bowel Problems	Oral Iron	3086	774247	0.40%	1552	132391	1.17%
01030500	04030300	Proton Pump Inhibitors	Selective Serotonin Re-Uptake Inhibitors (SSRI)	3082	774247	0.40%	2370	132391	1.79%
05010201	13020102	Cephalosporins	Emollient Skin Preparations	3067	774247	0.40%	1113	132391	0.84%
04010100	05010103	Hypnotics	Broad-Spectrum Penicillins	3057	774247	0.39%	1494	132391	1.13%
01030100	01060400	H2-Receptor Antagonists	Osmotic Laxatives	3037	774247	0.39%	1233	132391	0.93%
06020100	07020250	Thyroid Hormones	Preparations For Vaginal And Vulval Candidiasis	3023	774247	0.39%	1847	132391	1.40%
01010201	04010100	Compound Alginate Preparations	Hypnotics	3015	774247	0.39%	1429	132391	1.08%
07020250	13040200	Preparations For Vaginal And Vulval Candidiasis	Mild Topical Corticosteroids	3007	774247	0.39%	854	132391	0.65%
01010201	06020100	Compound Alginate Preparations	Thyroid Hormones	3005	774247	0.39%	1884	132391	1.42%
03020000	05010201	Corticosteroids (For Respiratory Conditions)	Cephalosporins	3001	774247	0.39%	1506	132391	1.14%
01060200	09010101	Stimulant Laxatives	Oral Iron	2986	774247	0.39%	1066	132391	0.81%
04010100	04070100	Hypnotics	Non-Opioid And Compound Analgesics	2985	774247	0.39%	1627	132391	1.23%
04070200	05010103	Opioid Analgesics	Broad-Spectrum Penicillins	2962	774247	0.38%	1582	132391	1.19%
04030100	04070100	Tricyclic And Related Antidepressants	Non-Opioid And Compound Analgesics	2952	774247	0.38%	1844	132391	1.39%
02040000	09010101	Beta-Adrenoceptor Blockers	Oral Iron	2947	774247	0.38%	1532	132391	1.16%
04070100	11040200	Non-Opioid And Compound Analgesics	Other Anti-Inflammatory Eye Preparations (For The Eye)	2944	774247	0.38%	1186	132391	0.90%
01030500	04060000	Proton Pump Inhibitors	Products Used Against Nausea And Vertigo	2908	774247	0.38%	1385	132391	1.05%
13020100	13020102	Emollients	Emollient Skin Preparations	2898	774247	0.37%	1072	132391	0.81%
13020103	13040000	Antimicrobial Emollients	Topical Corticosteroids	2865	774247	0.37%	1071	132391	0.81%
03010000	03020000	Bronchodilators	Corticosteroids (For Respiratory Conditions)	2864	774247	0.37%	1282	132391	0.97%
09010101	13040200	Oral Iron	Mild Topical Corticosteroids	2837	774247	0.37%	708	132391	0.53%
01050200	03020000	Corticosteroids In Chronic Bowel Problems	Corticosteroids (For Respiratory Conditions)	2788	774247	0.36%	1395	132391	1.05%
04010100	07020250	Hypnotics	Preparations For Vaginal And Vulval Candidiasis	2773	774247	0.36%	1318	132391	1.00%
04070100	11030100	Non-Opioid And Compound Analgesics	Antibacterials (In Eye Preparation)	2751	774247	0.36%	895	132391	0.68%
01030100	01030500	H2-Receptor Antagonists	Proton Pump Inhibitors	2738	774247	0.35%	1296	132391	0.98%
09010101	13030000	Oral Iron	Topical Local Anaesthetics And Antipruritics	2735	774247	0.35%	713	132391	0.54%
01060400	04020101	Osmotic Laxatives	First-Generation Antipsychotic Drugs	2732	774247	0.35%	1037	132391	0.78%
01010201	05011100	Compound Alginate Preparations	Metronidazole And Tinidazole	2728	774247	0.35%	793	132391	0.60%
04020101	04065400	First-Generation Antipsychotic Drugs	Products Used Against Nausea And Vertigo - Antihistamines	2727	774247	0.35%	922	132391	0.70%
01030500	13040000	Proton Pump Inhibitors	Topical Corticosteroids	2723	774247	0.35%	1388	132391	1.05%
04010201	04070100	Benzodiazepines	Non-Opioid And Compound Analgesics	2704	774247	0.35%	1560	132391	1.18%
04010100	04030300	Hypnotics	Selective Serotonin Re-Uptake Inhibitors (SSRI)	2701	774247	0.35%	1874	132391	1.42%
04030100	09010101	Tricyclic And Related Antidepressants	Oral Iron	2689	774247	0.35%	1600	132391	1.21%
01060400	05011300	Osmotic Laxatives	Urinary-Tract Infections	2685	774247	0.35%	953	132391	0.72%
04020101	05010201	First-Generation Antipsychotic Drugs	Cephalosporins	2678	774247	0.35%	915	132391	0.69%
01010201	13020101	Compound Alginate Preparations	Emollient Bath Additives And Shower Preparations	2672	774247	0.35%	1055	132391	0.80%
04070100	10030250	Non-Opioid And Compound Analgesics	Topical Nsaids And Counter Irritants	2671	774247	0.34%	980	132391	0.74%
03040101	13020102	Non-Sedating Antihistamines	Emollient Skin Preparations	2659	774247	0.34%	1177	132391	0.89%
05010103	12010151	Broad-Spectrum Penicillins	Anti-Inflammatory Preparations	2654	774247	0.34%	817	132391	0.62%
07020250	13020101	Preparations For Vaginal And Vulval Candidiasis	Emollient Bath Additives And Shower Preparations	2648	774247	0.34%	1059	132391	0.80%
01070000	04070100	Local Products For Anal Or Rectal Problems	Non-Opioid And Compound Analgesics	2638	774247	0.34%	915	132391	0.69%
01010201	04070200	Compound Alginate Preparations	Opioid Analgesics	2631	774247	0.34%	1358	132391	1.03%
06040102	09010101	Progestogens And Progesterone Receptor Modulators	Oral Iron	2631	774247	0.34%	859	132391	0.65%
04030300	06040103	Selective Serotonin Re-Uptake Inhibitors (SSRI)	Progestogen Products Doubling (In House Use)	2596	774247	0.34%	1310	132391	0.99%
01010101	07020250	Aluminium- And Magnesium- Containing Antacids	Preparations For Vaginal And Vulval Candidiasis	2593	774247	0.33%	708	132391	0.53%
06010202	09010101	Biguanides (Metformin)	Oral Iron	2592	774247	0.33%	1217	132391	0.92%
01010101	05010103	Aluminium- And Magnesium- Containing Antacids	Broad-Spectrum Penicillins	2591	774247	0.33%	681	132391	0.51%
04070100	13100101	Non-Opioid And Compound Analgesics	Antibacterial Preparations Only Used Topically	2569	774247	0.33%	970	132391	0.73%
05010101	13040000	Benzylpenicillin And Phenoxymethylpenicillin	Topical Corticosteroids	2550	774247	0.33%	864	132391	0.65%
04070100	05011100	Non-Opioid And Compound Analgesics	Metronidazole And Tinidazole	2549	774247	0.33%	879	132391	0.66%
01030100	03010101	H2-Receptor Antagonists	Selective Beta 2 Agonists	2546	774247	0.33%	1446	132391	1.09%
06040103	13040000	Progestogen Products Doubling (In House Use)	Topical Corticosteroids	2543	774247	0.33%	729	132391	0.55%
11040200	13040000	Other Anti-Inflammatory Eye Preparations (For The Eye)	Topical Corticosteroids	2527	774247	0.33%	1081	132391	0.82%
01060400	05010500	Osmotic Laxatives	Macrolides	2495	774247	0.32%	965	132391	0.73%
03010101	05010102	Selective Beta 2 Agonists	Penicillinase-Resistant Penicillins	2494	774247	0.32%	1357	132391	1.02%
05011300	13040000	Urinary-Tract Infections	Topical Corticosteroids	2493	774247	0.32%	958	132391	0.72%
05010103	14040800	Broad-Spectrum Penicillins	Vaccines And Antisera - Diphtheria Vaccines	2491	774247	0.32%	690	132391	0.52%
05010103	13020101	Broad-Spectrum Penicillins	Emollient Bath Additives And Shower Preparations	2486	774247	0.32%	1036	132391	0.78%
01060400	03020000	Osmotic Laxatives	Corticosteroids (For Respiratory Conditions)	2476	774247	0.32%	1408	132391	1.06%
01070200	05010201	Compound Haemorrhoid Products With Corticosteroids	Cephalosporins	2470	774247	0.32%	821	132391	0.62%
04070200	07020250	Opioid Analgesics	Preparations For Vaginal And Vulval Candidiasis	2467	774247	0.32%	1320	132391	1.00%
03040102	12020101	Sedating Antihistamines	Corticosteroids Used In Nasal Allergy	2464	774247	0.32%	994	132391	0.75%
01030500	05010201	Proton Pump Inhibitors	Cephalosporins	2460	774247	0.32%	1200	132391	0.91%
01010201	01060200	Compound Alginate Preparations	Stimulant Laxatives	2455	774247	0.32%	962	132391	0.73%
01060400	04065400	Osmotic Laxatives	Products Used Against Nausea And Vertigo - Antihistamines	2449	774247	0.32%	928	132391	0.70%
04065400	05010201	Products Used Against Nausea And Vertigo - Antihistamines	Cephalosporins	2426	774247	0.31%	827	132391	0.62%
05010102	05010201	Penicillinase-Resistant Penicillins	Cephalosporins	2410	774247	0.31%	772	132391	0.58%
01030100	05010201	H2-Receptor Antagonists	Cephalosporins	2397	774247	0.31%	924	132391	0.70%
01030100	13040000	H2-Receptor Antagonists	Topical Corticosteroids	2374	774247	0.31%	1019	132391	0.77%
01010101	04070100	Aluminium- And Magnesium- Containing Antacids	Non-Opioid And Compound Analgesics	2366	774247	0.31%	733	132391	0.55%
01060400	05010102	Osmotic Laxatives	Penicillinase-Resistant Penicillins	2365	774247	0.31%	855	132391	0.65%
09010101	10030250	Oral Iron	Topical Nsaids And Counter Irritants	2365	774247	0.31%	693	132391	0.52%
03010000	05010103	Bronchodilators	Broad-Spectrum Penicillins	2361	774247	0.30%	1044	132391	0.79%
05010101	05010201	Benzylpenicillin And Phenoxymethylpenicillin	Cephalosporins	2361	774247	0.30%	691	132391	0.52%
01050200	07020250	Corticosteroids In Chronic Bowel Problems	Preparations For Vaginal And Vulval Candidiasis	2346	774247	0.30%	1311	132391	0.99%
04010201	09010101	Benzodiazepines	Oral Iron	2345	774247	0.30%	1358	132391	1.03%
01010201	01050200	Compound Alginate Preparations	Corticosteroids In Chronic Bowel Problems	2344	774247	0.30%	1301	132391	0.98%
05010201	06040103	Cephalosporins	Progestogen Products Doubling (In House Use)	2342	774247	0.30%	575	132391	0.43%
04060000	05011300	Products Used Against Nausea And Vertigo	Urinary-Tract Infections	2336	774247	0.30%	892	132391	0.67%
01010201	13040200	Compound Alginate Preparations	Mild Topical Corticosteroids	2316	774247	0.30%	711	132391	0.54%
12020101	13020102	Corticosteroids Used In Nasal Allergy	Emollient Skin Preparations	2314	774247	0.30%	1162	132391	0.88%
04030300	12020101	Selective Serotonin Re-Uptake Inhibitors (SSRI)	Corticosteroids Used In Nasal Allergy	2309	774247	0.30%	1744	132391	1.32%
03010101	05011300	Selective Beta 2 Agonists	Urinary-Tract Infections	2299	774247	0.30%	1247	132391	0.94%
04060000	04065600	Products Used Against Nausea And Vertigo	Products Used Against Nausea And Vertigo - 5 HT3 Antagonists	2298	774247	0.30%	801	132391	0.61%
03010000	03010101	Bronchodilators	Selective Beta 2 Agonists	2294	774247	0.30%	1233	132391	0.93%
09010101	12010151	Oral Iron	Anti-Inflammatory Preparations	2290	774247	0.30%	636	132391	0.48%
01060400	03040102	Osmotic Laxatives	Sedating Antihistamines	2288	774247	0.30%	875	132391	0.66%
10010100	13040000	Non-Steroidal Anti-Inflammatory Drugs	Topical Corticosteroids	2284	774247	0.29%	915	132391	0.69%
05010800	05011300	Sulphonamides And Trimethoprim	Urinary-Tract Infections	2282	774247	0.29%	713	132391	0.54%
03010101	13020100	Selective Beta 2 Agonists	Emollients	2275	774247	0.29%	1301	132391	0.98%
04020101	04030300	First-Generation Antipsychotic Drugs	Selective Serotonin Re-Uptake Inhibitors (SSRI)	2271	774247	0.29%	1595	132391	1.20%
05010201	10010100	Cephalosporins	Non-Steroidal Anti-Inflammatory Drugs	2267	774247	0.29%	798	132391	0.60%
13040000	13100101	Topical Corticosteroids	Antibacterial Preparations Only Used Topically	2262	774247	0.29%	802	132391	0.61%
05020100	07020250	Triazole Antifungals	Preparations For Vaginal And Vulval Candidiasis	2261	774247	0.29%	770	132391	0.58%
04020101	04065500	First-Generation Antipsychotic Drugs	Products Used Against Nausea And Vertigo - Domperidone & Metoclopramide	2254	774247	0.29%	785	132391	0.59%
02040000	05010103	Beta-Adrenoceptor Blockers	Broad-Spectrum Penicillins	2254	774247	0.29%	1243	132391	0.94%
03020000	04030300	Corticosteroids (For Respiratory Conditions)	Selective Serotonin Re-Uptake Inhibitors (SSRI)	2245	774247	0.29%	1844	132391	1.39%
04070100	06020100	Non-Opioid And Compound Analgesics	Thyroid Hormones	2244	774247	0.29%	1522	132391	1.15%
01070200	03010101	Compound Haemorrhoid Products With Corticosteroids	Selective Beta 2 Agonists	2234	774247	0.29%	1176	132391	0.89%
03090200	05010103	Demulcent And Expectorant Cough Preparations	Broad-Spectrum Penicillins	2234	774247	0.29%	569	132391	0.43%
09010101	12030100	Oral Iron	Drugs For Oral Ulceration And Inflammation	2228	774247	0.29%	616	132391	0.47%
03040102	05010201	Sedating Antihistamines	Cephalosporins	2225	774247	0.29%	773	132391	0.58%
07020250	14040800	Preparations For Vaginal And Vulval Candidiasis	Vaccines And Antisera - Diphtheria Vaccines	2223	774247	0.29%	593	132391	0.45%
01050200	04070100	Corticosteroids In Chronic Bowel Problems	Non-Opioid And Compound Analgesics	2221	774247	0.29%	1350	132391	1.02%
04020101	13040000	First-Generation Antipsychotic Drugs	Topical Corticosteroids	2219	774247	0.29%	896	132391	0.68%
04030100	05010103	Tricyclic And Related Antidepressants	Broad-Spectrum Penicillins	2216	774247	0.29%	1385	132391	1.05%
01060400	10010100	Osmotic Laxatives	Non-Steroidal Anti-Inflammatory Drugs	2210	774247	0.29%	884	132391	0.67%
01010201	02040000	Compound Alginate Preparations	Beta-Adrenoceptor Blockers	2204	774247	0.28%	1194	132391	0.90%
01060400	03040101	Osmotic Laxatives	Non-Sedating Antihistamines	2204	774247	0.28%	1091	132391	0.82%
04065400	04065500	Products Used Against Nausea And Vertigo - Antihistamines	Products Used Against Nausea And Vertigo - Domperidone & Metoclopramide	2203	774247	0.28%	727	132391	0.55%
03010101	05010101	Selective Beta 2 Agonists	Benzylpenicillin And Phenoxymethylpenicillin	2196	774247	0.28%	998	132391	0.75%
03010101	06040103	Selective Beta 2 Agonists	Progestogen Products Doubling (In House Use)	2196	774247	0.28%	993	132391	0.75%
01040200	01060400	Antimotility Products	Osmotic Laxatives	2192	774247	0.28%	953	132391	0.72%
13020100	13020101	Emollients	Emollient Bath Additives And Shower Preparations	2190	774247	0.28%	774	132391	0.58%
01060200	07020250	Stimulant Laxatives	Preparations For Vaginal And Vulval Candidiasis	2174	774247	0.28%	866	132391	0.65%
03010101	04065400	Selective Beta 2 Agonists	Products Used Against Nausea And Vertigo - Antihistamines	2170	774247	0.28%	1198	132391	0.90%
03090200	09010101	Demulcent And Expectorant Cough Preparations	Oral Iron	2157	774247	0.28%	491	132391	0.37%
03010101	04020101	Selective Beta 2 Agonists	First-Generation Antipsychotic Drugs	2156	774247	0.28%	1196	132391	0.90%
01060200	04070100	Stimulant Laxatives	Non-Opioid And Compound Analgesics	2145	774247	0.28%	996	132391	0.75%
01060400	02090000	Osmotic Laxatives	Antiplatelet Products	2143	774247	0.28%	925	132391	0.70%
04010201	05010103	Benzodiazepines	Broad-Spectrum Penicillins	2136	774247	0.28%	1300	132391	0.98%
04010201	04030300	Benzodiazepines	Selective Serotonin Re-Uptake Inhibitors (SSRI)	2135	774247	0.28%	1574	132391	1.19%
03010000	09010101	Bronchodilators	Oral Iron	2122	774247	0.27%	890	132391	0.67%
03020000	13020102	Corticosteroids (For Respiratory Conditions)	Emollient Skin Preparations	2122	774247	0.27%	1264	132391	0.95%
01060200	05010103	Stimulant Laxatives	Broad-Spectrum Penicillins	2117	774247	0.27%	881	132391	0.67%
01060400	13020100	Osmotic Laxatives	Emollients	2113	774247	0.27%	779	132391	0.59%
01010201	04030100	Compound Alginate Preparations	Tricyclic And Related Antidepressants	2111	774247	0.27%	1320	132391	1.00%
04030300	13020102	Selective Serotonin Re-Uptake Inhibitors (SSRI)	Emollient Skin Preparations	2109	774247	0.27%	1452	132391	1.10%
05010102	13020102	Penicillinase-Resistant Penicillins	Emollient Skin Preparations	2107	774247	0.27%	805	132391	0.61%
04030100	07020250	Tricyclic And Related Antidepressants	Preparations For Vaginal And Vulval Candidiasis	2105	774247	0.27%	1316	132391	0.99%
03020000	03040101	Corticosteroids (For Respiratory Conditions)	Non-Sedating Antihistamines	2097	774247	0.27%	1307	132391	0.99%
02090000	13040000	Antiplatelet Products	Topical Corticosteroids	2094	774247	0.27%	963	132391	0.73%
05010103	06010202	Broad-Spectrum Penicillins	Biguanides (Metformin)	2088	774247	0.27%	1066	132391	0.81%
04030300	05011300	Selective Serotonin Re-Uptake Inhibitors (SSRI)	Urinary-Tract Infections	2086	774247	0.27%	1383	132391	1.04%
02040000	04070100	Beta-Adrenoceptor Blockers	Non-Opioid And Compound Analgesics	2079	774247	0.27%	1252	132391	0.95%
05010103	13040200	Broad-Spectrum Penicillins	Mild Topical Corticosteroids	2072	774247	0.27%	625	132391	0.47%
02090000	03010101	Antiplatelet Products	Selective Beta 2 Agonists	2059	774247	0.27%	1247	132391	0.94%
01030100	04030300	H2-Receptor Antagonists	Selective Serotonin Re-Uptake Inhibitors (SSRI)	2027	774247	0.26%	1463	132391	1.11%
01070100	09010101	Soothing Haemorrhoid Products	Oral Iron	2027	774247	0.26%	505	132391	0.38%
11030100	13040000	Antibacterials (In Eye Preparation)	Topical Corticosteroids	2026	774247	0.26%	688	132391	0.52%
01060400	05010101	Osmotic Laxatives	Benzylpenicillin And Phenoxymethylpenicillin	2025	774247	0.26%	655	132391	0.49%
09010101	13060102	Oral Iron	Topical Antibacterials For Acne	2020	774247	0.26%	531	132391	0.40%
01060400	04065500	Osmotic Laxatives	Products Used Against Nausea And Vertigo - Domperidone & Metoclopramide	2008	774247	0.26%	829	132391	0.63%
04065400	13040000	Products Used Against Nausea And Vertigo - Antihistamines	Topical Corticosteroids	2005	774247	0.26%	782	132391	0.59%
01060100	01070200	Bulk-Forming Laxatives	Compound Haemorrhoid Products With Corticosteroids	2001	774247	0.26%	595	132391	0.45%
03020000	05010500	Corticosteroids (For Respiratory Conditions)	Macrolides	2001	774247	0.26%	1070	132391	0.81%
01010201	13030000	Compound Alginate Preparations	Topical Local Anaesthetics And Antipruritics	1998	774247	0.26%	613	132391	0.46%
01010201	03010000	Compound Alginate Preparations	Bronchodilators	1996	774247	0.26%	959	132391	0.72%
13040000	71580200	Topical Corticosteroids	Emollient Ointment	1992	774247	0.26%	750	132391	0.57%
04065500	05010201	Products Used Against Nausea And Vertigo - Domperidone & Metoclopramide	Cephalosporins	1990	774247	0.26%	688	132391	0.52%
04030300	04065400	Selective Serotonin Re-Uptake Inhibitors (SSRI)	Products Used Against Nausea And Vertigo - Antihistamines	1985	774247	0.26%	1332	132391	1.01%
05010800	13040000	Sulphonamides And Trimethoprim	Topical Corticosteroids	1984	774247	0.26%	685	132391	0.52%
04030300	05010102	Selective Serotonin Re-Uptake Inhibitors (SSRI)	Penicillinase-Resistant Penicillins	1981	774247	0.26%	1296	132391	0.98%
09010101	13020103	Oral Iron	Antimicrobial Emollients	1977	774247	0.26%	669	132391	0.51%
01010201	01070100	Compound Alginate Preparations	Soothing Haemorrhoid Products	1976	774247	0.26%	558	132391	0.42%
05010201	13020100	Cephalosporins	Emollients	1970	774247	0.25%	654	132391	0.49%
03040101	04030300	Non-Sedating Antihistamines	Selective Serotonin Re-Uptake Inhibitors (SSRI)	1967	774247	0.25%	1525	132391	1.15%
01060100	13040000	Bulk-Forming Laxatives	Topical Corticosteroids	1957	774247	0.25%	784	132391	0.59%
05010103	12030100	Broad-Spectrum Penicillins	Drugs For Oral Ulceration And Inflammation	1949	774247	0.25%	643	132391	0.49%
06010101	06010202	Short-Acting Insulins	Biguanides (Metformin)	1941	774247	0.25%	1062	132391	0.80%
04030300	10010100	Selective Serotonin Re-Uptake Inhibitors (SSRI)	Non-Steroidal Anti-Inflammatory Drugs	1941	774247	0.25%	1269	132391	0.96%
01020200	09010101	Other Antispasmodics	Oral Iron	1930	774247	0.25%	834	132391	0.63%
04030300	05010500	Selective Serotonin Re-Uptake Inhibitors (SSRI)	Macrolides	1926	774247	0.25%	1342	132391	1.01%
09010101	09020102	Oral Iron	Oral Sodium And Water	1924	774247	0.25%	433	132391	0.33%
04070100	13020101	Non-Opioid And Compound Analgesics	Emollient Bath Additives And Shower Preparations	1918	774247	0.25%	862	132391	0.65%
04030400	09010101	Other Antidepressants	Oral Iron	1915	774247	0.25%	1457	132391	1.10%
03040102	13020100	Sedating Antihistamines	Emollients	1910	774247	0.25%	645	132391	0.49%
06010102	06010202	Intermediate- And Long-Acting Insulins	Biguanides (Metformin)	1903	774247	0.25%	1035	132391	0.78%
01060400	05010800	Osmotic Laxatives	Sulphonamides And Trimethoprim	1900	774247	0.25%	699	132391	0.53%
03040101	03040102	Non-Sedating Antihistamines	Sedating Antihistamines	1886	774247	0.24%	822	132391	0.62%
01010201	09060400	Compound Alginate Preparations	Vitamin D	1883	774247	0.24%	657	132391	0.50%
05010103	09060400	Broad-Spectrum Penicillins	Vitamin D	1883	774247	0.24%	691	132391	0.52%
03010101	10010100	Selective Beta 2 Agonists	Non-Steroidal Anti-Inflammatory Drugs	1881	774247	0.24%	1068	132391	0.81%
04070100	12030100	Non-Opioid And Compound Analgesics	Drugs For Oral Ulceration And Inflammation	1881	774247	0.24%	623	132391	0.47%
09010101	14040200	Oral Iron	Vaccines And Antisera - Influenza Vaccines	1879	774247	0.24%	464	132391	0.35%
09010101	13100300	Oral Iron	Antiviral Preparations (Topical	1875	774247	0.24%	550	132391	0.42%
01060400	06040103	Osmotic Laxatives	Progestogen Products Doubling (In House Use)	1872	774247	0.24%	580	132391	0.44%
04105100	05010201	Substance Dependence - Nicotine Dependence	Cephalosporins	1871	774247	0.24%	617	132391	0.47%
01010201	04010201	Compound Alginate Preparations	Benzodiazepines	1869	774247	0.24%	1155	132391	0.87%
03010101	13020101	Selective Beta 2 Agonists	Emollient Bath Additives And Shower Preparations	1868	774247	0.24%	1209	132391	0.91%
03040101	05010201	Non-Sedating Antihistamines	Cephalosporins	1864	774247	0.24%	848	132391	0.64%
05010500	12020101	Macrolides	Corticosteroids Used In Nasal Allergy	1860	774247	0.24%	893	132391	0.67%
05010102	13100101	Penicillinase-Resistant Penicillins	Antibacterial Preparations Only Used Topically	1854	774247	0.24%	523	132391	0.40%
01040200	03010101	Antimotility Products	Selective Beta 2 Agonists	1846	774247	0.24%	1147	132391	0.87%
09010101	09060700	Oral Iron	Multivitamin And Multimineral Preparations	1846	774247	0.24%	540	132391	0.41%
03010101	04105100	Selective Beta 2 Agonists	Substance Dependence - Nicotine Dependence	1843	774247	0.24%	985	132391	0.74%
01010201	14040800	Compound Alginate Preparations	Vaccines And Antisera - Diphtheria Vaccines	1840	774247	0.24%	512	132391	0.39%
01060100	05010201	Bulk-Forming Laxatives	Cephalosporins	1831	774247	0.24%	662	132391	0.50%
01030100	04020101	H2-Receptor Antagonists	First-Generation Antipsychotic Drugs	1830	774247	0.24%	709	132391	0.54%
07020250	13030000	Preparations For Vaginal And Vulval Candidiasis	Topical Local Anaesthetics And Antipruritics	1819	774247	0.23%	567	132391	0.43%
02040000	07020250	Beta-Adrenoceptor Blockers	Preparations For Vaginal And Vulval Candidiasis	1815	774247	0.23%	1021	132391	0.77%
04060000	12020101	Products Used Against Nausea And Vertigo	Corticosteroids Used In Nasal Allergy	1802	774247	0.23%	839	132391	0.63%
06010202	07020250	Biguanides (Metformin)	Preparations For Vaginal And Vulval Candidiasis	1801	774247	0.23%	960	132391	0.73%
05010103	09010200	Broad-Spectrum Penicillins	Drugs Used In Megaloblastic Anaemias	1801	774247	0.23%	754	132391	0.57%
05010103	13030000	Broad-Spectrum Penicillins	Topical Local Anaesthetics And Antipruritics	1797	774247	0.23%	554	132391	0.42%
13030000	13040000	Topical Local Anaesthetics And Antipruritics	Topical Corticosteroids	1790	774247	0.23%	520	132391	0.39%
02090000	04030300	Antiplatelet Products	Selective Serotonin Re-Uptake Inhibitors (SSRI)	1789	774247	0.23%	1290	132391	0.97%
03090200	04070100	Demulcent And Expectorant Cough Preparations	Non-Opioid And Compound Analgesics	1786	774247	0.23%	517	132391	0.39%
01010000	01010201	Indigestion And GORD (Gastro-Oesophageal Reflux Disease)	Compound Alginate Preparations	1782	774247	0.23%	477	132391	0.36%
01010201	10030250	Compound Alginate Preparations	Topical Nsaids And Counter Irritants	1779	774247	0.23%	628	132391	0.47%
06010101	09010101	Short-Acting Insulins	Oral Iron	1777	774247	0.23%	1037	132391	0.78%
01040200	05010201	Antimotility Products	Cephalosporins	1775	774247	0.23%	724	132391	0.55%
03010101	05010800	Selective Beta 2 Agonists	Sulphonamides And Trimethoprim	1773	774247	0.23%	930	132391	0.70%
01010201	13100300	Compound Alginate Preparations	Antiviral Preparations (Topical	1766	774247	0.23%	576	132391	0.44%
07020250	13100200	Preparations For Vaginal And Vulval Candidiasis	Antifungal Preparations (Topical	1765	774247	0.23%	476	132391	0.36%
09010101	13100200	Oral Iron	Antifungal Preparations (Topical	1762	774247	0.23%	454	132391	0.34%
02040000	04030300	Beta-Adrenoceptor Blockers	Selective Serotonin Re-Uptake Inhibitors (SSRI)	1755	774247	0.23%	1323	132391	1.00%
07020250	12010151	Preparations For Vaginal And Vulval Candidiasis	Anti-Inflammatory Preparations	1755	774247	0.23%	583	132391	0.44%
01060400	04105100	Osmotic Laxatives	Substance Dependence - Nicotine Dependence	1754	774247	0.23%	670	132391	0.51%
05010103	10030250	Broad-Spectrum Penicillins	Topical Nsaids And Counter Irritants	1751	774247	0.23%	626	132391	0.47%
01010201	03090200	Compound Alginate Preparations	Demulcent And Expectorant Cough Preparations	1750	774247	0.23%	475	132391	0.36%
01030500	12020101	Proton Pump Inhibitors	Corticosteroids Used In Nasal Allergy	1747	774247	0.23%	1015	132391	0.77%
01010201	06040102	Compound Alginate Preparations	Progestogens And Progesterone Receptor Modulators	1744	774247	0.23%	612	132391	0.46%
05010201	05011100	Cephalosporins	Metronidazole And Tinidazole	1743	774247	0.23%	503	132391	0.38%
01070100	07020250	Soothing Haemorrhoid Products	Preparations For Vaginal And Vulval Candidiasis	1741	774247	0.22%	522	132391	0.39%
01010201	01020200	Compound Alginate Preparations	Other Antispasmodics	1737	774247	0.22%	799	132391	0.60%
04010201	07020250	Benzodiazepines	Preparations For Vaginal And Vulval Candidiasis	1735	774247	0.22%	1106	132391	0.84%
04020100	09010101	Antipsychotic Products	Oral Iron	1735	774247	0.22%	420	132391	0.32%
01070200	04030300	Compound Haemorrhoid Products With Corticosteroids	Selective Serotonin Re-Uptake Inhibitors (SSRI)	1730	774247	0.22%	1190	132391	0.90%
01010201	12030100	Compound Alginate Preparations	Drugs For Oral Ulceration And Inflammation	1729	774247	0.22%	545	132391	0.41%
04030400	04070100	Other Antidepressants	Non-Opioid And Compound Analgesics	1728	774247	0.22%	1377	132391	1.04%
01010201	12010151	Compound Alginate Preparations	Anti-Inflammatory Preparations	1728	774247	0.22%	563	132391	0.43%
04060000	13020102	Products Used Against Nausea And Vertigo	Emollient Skin Preparations	1719	774247	0.22%	700	132391	0.53%
07020250	09060400	Preparations For Vaginal And Vulval Candidiasis	Vitamin D	1713	774247	0.22%	664	132391	0.50%
03040102	11040200	Sedating Antihistamines	Other Anti-Inflammatory Eye Preparations (For The Eye)	1709	774247	0.22%	577	132391	0.44%
02090000	05010201	Antiplatelet Products	Cephalosporins	1705	774247	0.22%	712	132391	0.54%
05010103	06010101	Broad-Spectrum Penicillins	Short-Acting Insulins	1700	774247	0.22%	1098	132391	0.83%
04070100	12010151	Non-Opioid And Compound Analgesics	Anti-Inflammatory Preparations	1693	774247	0.22%	624	132391	0.47%
01070000	13040000	Local Products For Anal Or Rectal Problems	Topical Corticosteroids	1688	774247	0.22%	567	132391	0.43%
06020100	13040000	Thyroid Hormones	Topical Corticosteroids	1688	774247	0.22%	1082	132391	0.82%
07020250	13060102	Preparations For Vaginal And Vulval Candidiasis	Topical Antibacterials For Acne	1687	774247	0.22%	469	132391	0.35%
03040102	04030300	Sedating Antihistamines	Selective Serotonin Re-Uptake Inhibitors (SSRI)	1682	774247	0.22%	1174	132391	0.89%
01040200	13040000	Antimotility Products	Topical Corticosteroids	1679	774247	0.22%	804	132391	0.61%
09010101	13100400	Oral Iron	Parasiticidal Preparations (Topical)	1679	774247	0.22%	399	132391	0.30%
04030100	04030300	Tricyclic And Related Antidepressants	Selective Serotonin Re-Uptake Inhibitors (SSRI)	1675	774247	0.22%	1176	132391	0.89%
07020250	13100300	Preparations For Vaginal And Vulval Candidiasis	Antiviral Preparations (Topical	1674	774247	0.22%	545	132391	0.41%
01010201	06010202	Compound Alginate Preparations	Biguanides (Metformin)	1673	774247	0.22%	864	132391	0.65%
01060400	11040200	Osmotic Laxatives	Other Anti-Inflammatory Eye Preparations (For The Eye)	1658	774247	0.21%	701	132391	0.53%
04070100	09060400	Non-Opioid And Compound Analgesics	Vitamin D	1656	774247	0.21%	679	132391	0.51%
04030300	04070200	Selective Serotonin Re-Uptake Inhibitors (SSRI)	Opioid Analgesics	1654	774247	0.21%	1317	132391	0.99%
03010101	04065500	Selective Beta 2 Agonists	Products Used Against Nausea And Vertigo - Domperidone & Metoclopramide	1649	774247	0.21%	948	132391	0.72%
01060400	04070200	Osmotic Laxatives	Opioid Analgesics	1649	774247	0.21%	951	132391	0.72%
01020200	04070100	Other Antispasmodics	Non-Opioid And Compound Analgesics	1647	774247	0.21%	826	132391	0.62%
03010101	11030100	Selective Beta 2 Agonists	Antibacterials (In Eye Preparation)	1635	774247	0.21%	775	132391	0.59%
05010103	06010102	Broad-Spectrum Penicillins	Intermediate- And Long-Acting Insulins	1634	774247	0.21%	1049	132391	0.79%
04105100	13040000	Substance Dependence - Nicotine Dependence	Topical Corticosteroids	1633	774247	0.21%	619	132391	0.47%
13040000	13040200	Topical Corticosteroids	Mild Topical Corticosteroids	1631	774247	0.21%	549	132391	0.41%
01010201	09020102	Compound Alginate Preparations	Oral Sodium And Water	1629	774247	0.21%	425	132391	0.32%
02080100	09010101	Parenteral Anticoagulants	Oral Iron	1627	774247	0.21%	654	132391	0.49%
01030500	04020101	Proton Pump Inhibitors	First-Generation Antipsychotic Drugs	1620	774247	0.21%	760	132391	0.57%
01030100	04065500	H2-Receptor Antagonists	Products Used Against Nausea And Vertigo - Domperidone & Metoclopramide	1620	774247	0.21%	658	132391	0.50%
01030500	02090000	Proton Pump Inhibitors	Antiplatelet Products	1617	774247	0.21%	928	132391	0.70%
05010201	11030100	Cephalosporins	Antibacterials (In Eye Preparation)	1617	774247	0.21%	457	132391	0.35%
01010201	13060102	Compound Alginate Preparations	Topical Antibacterials For Acne	1615	774247	0.21%	448	132391	0.34%
05010103	06040102	Broad-Spectrum Penicillins	Progestogens And Progesterone Receptor Modulators	1614	774247	0.21%	608	132391	0.46%
03010000	07020250	Bronchodilators	Preparations For Vaginal And Vulval Candidiasis	1610	774247	0.21%	789	132391	0.60%
06010102	09010101	Intermediate- And Long-Acting Insulins	Oral Iron	1608	774247	0.21%	939	132391	0.71%
04070100	13030000	Non-Opioid And Compound Analgesics	Topical Local Anaesthetics And Antipruritics	1607	774247	0.21%	530	132391	0.40%
01040200	04030300	Antimotility Products	Selective Serotonin Re-Uptake Inhibitors (SSRI)	1602	774247	0.21%	1172	132391	0.89%
01050200	13040000	Corticosteroids In Chronic Bowel Problems	Topical Corticosteroids	1601	774247	0.21%	968	132391	0.73%
01030500	04065500	Proton Pump Inhibitors	Products Used Against Nausea And Vertigo - Domperidone & Metoclopramide	1595	774247	0.21%	771	132391	0.58%
07020250	10030250	Preparations For Vaginal And Vulval Candidiasis	Topical Nsaids And Counter Irritants	1595	774247	0.21%	572	132391	0.43%
07020250	12030100	Preparations For Vaginal And Vulval Candidiasis	Drugs For Oral Ulceration And Inflammation	1594	774247	0.21%	533	132391	0.40%
01070000	01070200	Local Products For Anal Or Rectal Problems	Compound Haemorrhoid Products With Corticosteroids	1590	774247	0.21%	469	132391	0.35%
06010101	06010400	Short-Acting Insulins	Treatment Of Hypoglycaemia	1587	774247	0.20%	1027	132391	0.78%
04030300	04105100	Selective Serotonin Re-Uptake Inhibitors (SSRI)	Substance Dependence - Nicotine Dependence	1584	774247	0.20%	1046	132391	0.79%
07020250	09010200	Preparations For Vaginal And Vulval Candidiasis	Drugs Used In Megaloblastic Anaemias	1582	774247	0.20%	642	132391	0.48%
07020250	13020103	Preparations For Vaginal And Vulval Candidiasis	Antimicrobial Emollients	1581	774247	0.20%	590	132391	0.45%
04030300	04065500	Selective Serotonin Re-Uptake Inhibitors (SSRI)	Products Used Against Nausea And Vertigo - Domperidone & Metoclopramide	1578	774247	0.20%	1063	132391	0.80%
06040103	10010100	Progestogen Products Doubling (In House Use)	Non-Steroidal Anti-Inflammatory Drugs	1577	774247	0.20%	426	132391	0.32%
04030400	05010103	Other Antidepressants	Broad-Spectrum Penicillins	1575	774247	0.20%	1248	132391	0.94%
01030100	04065400	H2-Receptor Antagonists	Products Used Against Nausea And Vertigo - Antihistamines	1556	774247	0.20%	570	132391	0.43%
01060400	01070100	Osmotic Laxatives	Soothing Haemorrhoid Products	1555	774247	0.20%	455	132391	0.34%
02090000	04060000	Antiplatelet Products	Products Used Against Nausea And Vertigo	1548	774247	0.20%	636	132391	0.48%
03010101	04070200	Selective Beta 2 Agonists	Opioid Analgesics	1548	774247	0.20%	1122	132391	0.85%
01020200	05010103	Other Antispasmodics	Broad-Spectrum Penicillins	1547	774247	0.20%	705	132391	0.53%
03010101	06020100	Selective Beta 2 Agonists	Thyroid Hormones	1543	774247	0.20%	1293	132391	0.98%
09010101	09060300	Oral Iron	Vitamin C	1541	774247	0.20%	321	132391	0.24%
03020000	11040200	Corticosteroids (For Respiratory Conditions)	Other Anti-Inflammatory Eye Preparations (For The Eye)	1540	774247	0.20%	834	132391	0.63%
09010101	09050101	Oral Iron	Calcium Supplements	1539	774247	0.20%	454	132391	0.34%
06010102	06010400	Intermediate- And Long-Acting Insulins	Treatment Of Hypoglycaemia	1528	774247	0.20%	989	132391	0.75%
01020200	07020250	Other Antispasmodics	Preparations For Vaginal And Vulval Candidiasis	1528	774247	0.20%	681	132391	0.51%
01010201	04020100	Compound Alginate Preparations	Antipsychotic Products	1527	774247	0.20%	446	132391	0.34%
06010101	07020250	Short-Acting Insulins	Preparations For Vaginal And Vulval Candidiasis	1523	774247	0.20%	966	132391	0.73%
04070100	09010200	Non-Opioid And Compound Analgesics	Drugs Used In Megaloblastic Anaemias	1520	774247	0.20%	702	132391	0.53%
04030300	05010800	Selective Serotonin Re-Uptake Inhibitors (SSRI)	Sulphonamides And Trimethoprim	1517	774247	0.20%	972	132391	0.73%
01060400	06020100	Osmotic Laxatives	Thyroid Hormones	1512	774247	0.20%	995	132391	0.75%
01070200	13020102	Compound Haemorrhoid Products With Corticosteroids	Emollient Skin Preparations	1512	774247	0.20%	541	132391	0.41%
01070200	12020101	Compound Haemorrhoid Products With Corticosteroids	Corticosteroids Used In Nasal Allergy	1510	774247	0.20%	639	132391	0.48%
04070100	06010202	Non-Opioid And Compound Analgesics	Biguanides (Metformin)	1509	774247	0.19%	903	132391	0.68%
05010201	11040200	Cephalosporins	Other Anti-Inflammatory Eye Preparations (For The Eye)	1509	774247	0.19%	577	132391	0.44%
04065500	13040000	Products Used Against Nausea And Vertigo - Domperidone & Metoclopramide	Topical Corticosteroids	1500	774247	0.19%	597	132391	0.45%
01010201	09010200	Compound Alginate Preparations	Drugs Used In Megaloblastic Anaemias	1499	774247	0.19%	605	132391	0.46%
05010500	13020102	Macrolides	Emollient Skin Preparations	1497	774247	0.19%	614	132391	0.46%
01030500	04065400	Proton Pump Inhibitors	Products Used Against Nausea And Vertigo - Antihistamines	1486	774247	0.19%	663	132391	0.50%
01030500	13020102	Proton Pump Inhibitors	Emollient Skin Preparations	1485	774247	0.19%	770	132391	0.58%
13020102	13020103	Emollient Skin Preparations	Antimicrobial Emollients	1482	774247	0.19%	585	132391	0.44%
05010103	13100300	Broad-Spectrum Penicillins	Antiviral Preparations (Topical	1482	774247	0.19%	514	132391	0.39%
04010100	04060000	Hypnotics	Products Used Against Nausea And Vertigo	1479	774247	0.19%	650	132391	0.49%
05010103	13020103	Broad-Spectrum Penicillins	Antimicrobial Emollients	1479	774247	0.19%	584	132391	0.44%
03040102	13030000	Sedating Antihistamines	Topical Local Anaesthetics And Antipruritics	1477	774247	0.19%	440	132391	0.33%
01060400	04010100	Osmotic Laxatives	Hypnotics	1472	774247	0.19%	784	132391	0.59%
03040102	04060000	Sedating Antihistamines	Products Used Against Nausea And Vertigo	1472	774247	0.19%	567	132391	0.43%
03090100	05010103	Cough Suppressants	Broad-Spectrum Penicillins	1472	774247	0.19%	387	132391	0.29%
06010102	07020250	Intermediate- And Long-Acting Insulins	Preparations For Vaginal And Vulval Candidiasis	1470	774247	0.19%	932	132391	0.70%
02040000	02090000	Beta-Adrenoceptor Blockers	Antiplatelet Products	1464	774247	0.19%	768	132391	0.58%
01060100	03010101	Bulk-Forming Laxatives	Selective Beta 2 Agonists	1464	774247	0.19%	804	132391	0.61%
01010000	09010101	Indigestion And GORD (Gastro-Oesophageal Reflux Disease)	Oral Iron	1464	774247	0.19%	406	132391	0.31%
01030100	02090000	H2-Receptor Antagonists	Antiplatelet Products	1455	774247	0.19%	659	132391	0.50%
01030500	05011300	Proton Pump Inhibitors	Urinary-Tract Infections	1454	774247	0.19%	711	132391	0.54%
04030300	05010101	Selective Serotonin Re-Uptake Inhibitors (SSRI)	Benzylpenicillin And Phenoxymethylpenicillin	1450	774247	0.19%	908	132391	0.69%
05010103	13060102	Broad-Spectrum Penicillins	Topical Antibacterials For Acne	1450	774247	0.19%	420	132391	0.32%
05011100	13040000	Metronidazole And Tinidazole	Topical Corticosteroids	1433	774247	0.19%	512	132391	0.39%
06040102	07020250	Progestogens And Progesterone Receptor Modulators	Preparations For Vaginal And Vulval Candidiasis	1431	774247	0.18%	532	132391	0.40%
01030100	12020101	H2-Receptor Antagonists	Corticosteroids Used In Nasal Allergy	1427	774247	0.18%	691	132391	0.52%
13040000	13090000	Topical Corticosteroids	Shampoos And Other Preparations For Scalp And Hair Conditions	1420	774247	0.18%	631	132391	0.48%
01010201	04030400	Compound Alginate Preparations	Other Antidepressants	1418	774247	0.18%	1120	132391	0.85%
02090000	06010202	Antiplatelet Products	Biguanides (Metformin)	1416	774247	0.18%	765	132391	0.58%
05010201	13100101	Cephalosporins	Antibacterial Preparations Only Used Topically	1412	774247	0.18%	482	132391	0.36%
03010101	04010100	Selective Beta 2 Agonists	Hypnotics	1404	774247	0.18%	975	132391	0.74%
04030300	04030400	Selective Serotonin Re-Uptake Inhibitors (SSRI)	Other Antidepressants	1404	774247	0.18%	1069	132391	0.81%
04030400	07020250	Other Antidepressants	Preparations For Vaginal And Vulval Candidiasis	1403	774247	0.18%	1104	132391	0.83%
05010103	09020102	Broad-Spectrum Penicillins	Oral Sodium And Water	1398	774247	0.18%	361	132391	0.27%
04070100	13040200	Non-Opioid And Compound Analgesics	Mild Topical Corticosteroids	1398	774247	0.18%	494	132391	0.37%
01050200	05010201	Corticosteroids In Chronic Bowel Problems	Cephalosporins	1394	774247	0.18%	778	132391	0.59%
01010201	13100200	Compound Alginate Preparations	Antifungal Preparations (Topical	1394	774247	0.18%	417	132391	0.31%
01010201	13020103	Compound Alginate Preparations	Antimicrobial Emollients	1388	774247	0.18%	535	132391	0.40%
07020250	07020251	Preparations For Vaginal And Vulval Candidiasis	Preparations For Other Vaginal Infections	1383	774247	0.18%	381	132391	0.29%
04070100	04070401	Non-Opioid And Compound Analgesics	Acute Migraine	1381	774247	0.18%	743	132391	0.56%
01060400	13100101	Osmotic Laxatives	Antibacterial Preparations Only Used Topically	1380	774247	0.18%	518	132391	0.39%
01010201	14040200	Compound Alginate Preparations	Vaccines And Antisera - Influenza Vaccines	1380	774247	0.18%	371	132391	0.28%
01030500	10010100	Proton Pump Inhibitors	Non-Steroidal Anti-Inflammatory Drugs	1377	774247	0.18%	742	132391	0.56%
01010101	01060400	Aluminium- And Magnesium- Containing Antacids	Osmotic Laxatives	1366	774247	0.18%	412	132391	0.31%
05010101	05010102	Benzylpenicillin And Phenoxymethylpenicillin	Penicillinase-Resistant Penicillins	1366	774247	0.18%	423	132391	0.32%
09010101	13090000	Oral Iron	Shampoos And Other Preparations For Scalp And Hair Conditions	1364	774247	0.18%	511	132391	0.39%
05010103	14040200	Broad-Spectrum Penicillins	Vaccines And Antisera - Influenza Vaccines	1363	774247	0.18%	408	132391	0.31%
04010100	05010201	Hypnotics	Cephalosporins	1361	774247	0.18%	657	132391	0.50%
03010101	13100101	Selective Beta 2 Agonists	Antibacterial Preparations Only Used Topically	1357	774247	0.18%	707	132391	0.53%
05010500	05011300	Macrolides	Urinary-Tract Infections	1354	774247	0.17%	523	132391	0.40%
03020000	03040102	Corticosteroids (For Respiratory Conditions)	Sedating Antihistamines	1352	774247	0.17%	771	132391	0.58%
01030500	03040101	Proton Pump Inhibitors	Non-Sedating Antihistamines	1351	774247	0.17%	853	132391	0.64%
01070000	05010201	Local Products For Anal Or Rectal Problems	Cephalosporins	1351	774247	0.17%	425	132391	0.32%
05010300	09010101	Tetracyclines	Oral Iron	1348	774247	0.17%	432	132391	0.33%
04065600	09010101	Products Used Against Nausea And Vertigo - 5 HT3 Antagonists	Oral Iron	1345	774247	0.17%	469	132391	0.35%
05010103	13100200	Broad-Spectrum Penicillins	Antifungal Preparations (Topical	1337	774247	0.17%	429	132391	0.32%
03020000	04060000	Corticosteroids (For Respiratory Conditions)	Products Used Against Nausea And Vertigo	1332	774247	0.17%	784	132391	0.59%
03090200	07020250	Demulcent And Expectorant Cough Preparations	Preparations For Vaginal And Vulval Candidiasis	1332	774247	0.17%	368	132391	0.28%
04065400	05011300	Products Used Against Nausea And Vertigo - Antihistamines	Urinary-Tract Infections	1329	774247	0.17%	454	132391	0.34%
01070100	05010103	Soothing Haemorrhoid Products	Broad-Spectrum Penicillins	1326	774247	0.17%	417	132391	0.31%
04070200	10010100	Opioid Analgesics	Non-Steroidal Anti-Inflammatory Drugs	1324	774247	0.17%	710	132391	0.54%
01030500	05010500	Proton Pump Inhibitors	Macrolides	1322	774247	0.17%	689	132391	0.52%
01060400	05011100	Osmotic Laxatives	Metronidazole And Tinidazole	1322	774247	0.17%	440	132391	0.33%
04030300	06020100	Selective Serotonin Re-Uptake Inhibitors (SSRI)	Thyroid Hormones	1322	774247	0.17%	1205	132391	0.91%
09010101	12010300	Oral Iron	Drugs Acting On The Ear - Removal Of Ear Wax	1322	774247	0.17%	343	132391	0.26%
14040200	14040800	Vaccines And Antisera - Influenza Vaccines	Vaccines And Antisera - Diphtheria Vaccines	1321	774247	0.17%	292	132391	0.22%
01050200	05010500	Corticosteroids In Chronic Bowel Problems	Macrolides	1317	774247	0.17%	711	132391	0.54%
04020100	05010103	Antipsychotic Products	Broad-Spectrum Penicillins	1309	774247	0.17%	367	132391	0.28%
04070100	13100300	Non-Opioid And Compound Analgesics	Antiviral Preparations (Topical	1309	774247	0.17%	496	132391	0.37%
04060000	05010500	Products Used Against Nausea And Vertigo	Macrolides	1307	774247	0.17%	550	132391	0.42%
05010102	12020101	Penicillinase-Resistant Penicillins	Corticosteroids Used In Nasal Allergy	1301	774247	0.17%	571	132391	0.43%
04070401	09010101	Acute Migraine	Oral Iron	1298	774247	0.17%	637	132391	0.48%
04010100	13040000	Hypnotics	Topical Corticosteroids	1297	774247	0.17%	682	132391	0.52%
04070200	05010201	Opioid Analgesics	Cephalosporins	1296	774247	0.17%	713	132391	0.54%
01060400	11030100	Osmotic Laxatives	Antibacterials (In Eye Preparation)	1295	774247	0.17%	405	132391	0.31%
01030500	03020000	Proton Pump Inhibitors	Corticosteroids (For Respiratory Conditions)	1294	774247	0.17%	852	132391	0.64%
04070100	14040800	Non-Opioid And Compound Analgesics	Vaccines And Antisera - Diphtheria Vaccines	1291	774247	0.17%	433	132391	0.33%
02080100	02090000	Parenteral Anticoagulants	Antiplatelet Products	1288	774247	0.17%	521	132391	0.39%
07020250	14040200	Preparations For Vaginal And Vulval Candidiasis	Vaccines And Antisera - Influenza Vaccines	1286	774247	0.17%	377	132391	0.28%
07020250	09020102	Preparations For Vaginal And Vulval Candidiasis	Oral Sodium And Water	1285	774247	0.17%	362	132391	0.27%
03040102	13020101	Sedating Antihistamines	Emollient Bath Additives And Shower Preparations	1285	774247	0.17%	506	132391	0.38%
05010102	06040103	Penicillinase-Resistant Penicillins	Progestogen Products Doubling (In House Use)	1284	774247	0.17%	323	132391	0.24%
05010103	09060700	Broad-Spectrum Penicillins	Multivitamin And Multimineral Preparations	1281	774247	0.17%	449	132391	0.34%
03090100	09010101	Cough Suppressants	Oral Iron	1280	774247	0.17%	305	132391	0.23%
04060000	05010102	Products Used Against Nausea And Vertigo	Penicillinase-Resistant Penicillins	1276	774247	0.16%	498	132391	0.38%
11040200	13020102	Other Anti-Inflammatory Eye Preparations (For The Eye)	Emollient Skin Preparations	1275	774247	0.16%	583	132391	0.44%
01070200	04060000	Compound Haemorrhoid Products With Corticosteroids	Products Used Against Nausea And Vertigo	1272	774247	0.16%	498	132391	0.38%
05010103	05010300	Broad-Spectrum Penicillins	Tetracyclines	1269	774247	0.16%	471	132391	0.36%
03040101	13020100	Non-Sedating Antihistamines	Emollients	1269	774247	0.16%	570	132391	0.43%
05020100	09010101	Triazole Antifungals	Oral Iron	1268	774247	0.16%	375	132391	0.28%
01030100	13020102	H2-Receptor Antagonists	Emollient Skin Preparations	1267	774247	0.16%	518	132391	0.39%
06040101	06040102	Oestrogens And HRT	Progestogens And Progesterone Receptor Modulators	1266	774247	0.16%	401	132391	0.30%
13040000	14040800	Topical Corticosteroids	Vaccines And Antisera - Diphtheria Vaccines	1263	774247	0.16%	419	132391	0.32%
01070000	03010101	Local Products For Anal Or Rectal Problems	Selective Beta 2 Agonists	1262	774247	0.16%	650	132391	0.49%
03010000	04070100	Bronchodilators	Non-Opioid And Compound Analgesics	1262	774247	0.16%	661	132391	0.50%
13040000	13100200	Topical Corticosteroids	Antifungal Preparations (Topical	1259	774247	0.16%	392	132391	0.30%
01040200	04060000	Antimotility Products	Products Used Against Nausea And Vertigo	1253	774247	0.16%	592	132391	0.45%
04070200	13040000	Opioid Analgesics	Topical Corticosteroids	1253	774247	0.16%	714	132391	0.54%
02090000	06010101	Antiplatelet Products	Short-Acting Insulins	1250	774247	0.16%	877	132391	0.66%
05010101	12020101	Benzylpenicillin And Phenoxymethylpenicillin	Corticosteroids Used In Nasal Allergy	1249	774247	0.16%	506	132391	0.38%
04060000	05010800	Products Used Against Nausea And Vertigo	Sulphonamides And Trimethoprim	1248	774247	0.16%	455	132391	0.34%
01010101	05010201	Aluminium- And Magnesium- Containing Antacids	Cephalosporins	1246	774247	0.16%	351	132391	0.27%
12020101	13020100	Corticosteroids Used In Nasal Allergy	Emollients	1242	774247	0.16%	587	132391	0.44%
09010101	12020300	Oral Iron	Nasal Preparations For Infection	1241	774247	0.16%	362	132391	0.27%
01030500	04070200	Proton Pump Inhibitors	Opioid Analgesics	1236	774247	0.16%	855	132391	0.65%
04020101	12020101	First-Generation Antipsychotic Drugs	Corticosteroids Used In Nasal Allergy	1232	774247	0.16%	576	132391	0.44%
01060400	04030100	Osmotic Laxatives	Tricyclic And Related Antidepressants	1227	774247	0.16%	811	132391	0.61%
05010103	05020100	Broad-Spectrum Penicillins	Triazole Antifungals	1227	774247	0.16%	481	132391	0.36%
05011300	13020102	Urinary-Tract Infections	Emollient Skin Preparations	1217	774247	0.16%	479	132391	0.36%
01060100	01060200	Bulk-Forming Laxatives	Stimulant Laxatives	1212	774247	0.16%	455	132391	0.34%
04020101	05011300	First-Generation Antipsychotic Drugs	Urinary-Tract Infections	1208	774247	0.16%	468	132391	0.35%
03040101	04060000	Non-Sedating Antihistamines	Products Used Against Nausea And Vertigo	1202	774247	0.16%	638	132391	0.48%
05010201	06020100	Cephalosporins	Thyroid Hormones	1200	774247	0.15%	781	132391	0.59%
05011300	12020101	Urinary-Tract Infections	Corticosteroids Used In Nasal Allergy	1199	774247	0.15%	556	132391	0.42%
02090000	06010102	Antiplatelet Products	Intermediate- And Long-Acting Insulins	1197	774247	0.15%	823	132391	0.62%
04070100	06010101	Non-Opioid And Compound Analgesics	Short-Acting Insulins	1195	774247	0.15%	773	132391	0.58%
01010101	13040000	Aluminium- And Magnesium- Containing Antacids	Topical Corticosteroids	1193	774247	0.15%	385	132391	0.29%
05010800	06040103	Sulphonamides And Trimethoprim	Progestogen Products Doubling (In House Use)	1191	774247	0.15%	294	132391	0.22%
01050200	12020101	Corticosteroids In Chronic Bowel Problems	Corticosteroids Used In Nasal Allergy	1191	774247	0.15%	796	132391	0.60%
03040102	05010102	Sedating Antihistamines	Penicillinase-Resistant Penicillins	1189	774247	0.15%	414	132391	0.31%
03010101	14040800	Selective Beta 2 Agonists	Vaccines And Antisera - Diphtheria Vaccines	1188	774247	0.15%	531	132391	0.40%
03020000	13020100	Corticosteroids (For Respiratory Conditions)	Emollients	1186	774247	0.15%	672	132391	0.51%
05010103	12010100	Broad-Spectrum Penicillins	Drugs Acting On The Ear - Otitis Externa	1185	774247	0.15%	339	132391	0.26%
04065400	12020101	Products Used Against Nausea And Vertigo - Antihistamines	Corticosteroids Used In Nasal Allergy	1182	774247	0.15%	533	132391	0.40%
01070000	01070100	Local Products For Anal Or Rectal Problems	Soothing Haemorrhoid Products	1181	774247	0.15%	325	132391	0.25%
01010201	06010101	Compound Alginate Preparations	Short-Acting Insulins	1180	774247	0.15%	694	132391	0.52%
03010101	04030100	Selective Beta 2 Agonists	Tricyclic And Related Antidepressants	1178	774247	0.15%	968	132391	0.73%
05010103	13100400	Broad-Spectrum Penicillins	Parasiticidal Preparations (Topical)	1172	774247	0.15%	373	132391	0.28%
01030100	05011300	H2-Receptor Antagonists	Urinary-Tract Infections	1169	774247	0.15%	500	132391	0.38%
04020100	04070100	Antipsychotic Products	Non-Opioid And Compound Analgesics	1166	774247	0.15%	398	132391	0.30%
04070100	09020102	Non-Opioid And Compound Analgesics	Oral Sodium And Water	1165	774247	0.15%	358	132391	0.27%
04070100	06010102	Non-Opioid And Compound Analgesics	Intermediate- And Long-Acting Insulins	1163	774247	0.15%	760	132391	0.57%
05010103	12010300	Broad-Spectrum Penicillins	Drugs Acting On The Ear - Removal Of Ear Wax	1162	774247	0.15%	330	132391	0.25%
05030201	09010101	Herpes Simplex And Varicella-Zoster Infection	Oral Iron	1160	774247	0.15%	328	132391	0.25%
01010201	13100400	Compound Alginate Preparations	Parasiticidal Preparations (Topical)	1154	774247	0.15%	327	132391	0.25%
07020250	13100400	Preparations For Vaginal And Vulval Candidiasis	Parasiticidal Preparations (Topical)	1153	774247	0.15%	317	132391	0.24%
04020100	07020250	Antipsychotic Products	Preparations For Vaginal And Vulval Candidiasis	1143	774247	0.15%	332	132391	0.25%
03040101	05010102	Non-Sedating Antihistamines	Penicillinase-Resistant Penicillins	1142	774247	0.15%	514	132391	0.39%
13020102	13100101	Emollient Skin Preparations	Antibacterial Preparations Only Used Topically	1142	774247	0.15%	419	132391	0.32%
05030201	07020250	Herpes Simplex And Varicella-Zoster Infection	Preparations For Vaginal And Vulval Candidiasis	1141	774247	0.15%	328	132391	0.25%
05010102	13020100	Penicillinase-Resistant Penicillins	Emollients	1141	774247	0.15%	426	132391	0.32%
02090000	05011300	Antiplatelet Products	Urinary-Tract Infections	1140	774247	0.15%	466	132391	0.35%
01020200	01060400	Other Antispasmodics	Osmotic Laxatives	1139	774247	0.15%	549	132391	0.41%
03010101	05011100	Selective Beta 2 Agonists	Metronidazole And Tinidazole	1139	774247	0.15%	566	132391	0.43%
01030500	01040200	Proton Pump Inhibitors	Antimotility Products	1136	774247	0.15%	671	132391	0.51%
03040101	06040103	Non-Sedating Antihistamines	Progestogen Products Doubling (In House Use)	1134	774247	0.15%	402	132391	0.30%
03020000	05010102	Corticosteroids (For Respiratory Conditions)	Penicillinase-Resistant Penicillins	1132	774247	0.15%	635	132391	0.48%
01030100	01070200	H2-Receptor Antagonists	Compound Haemorrhoid Products With Corticosteroids	1129	774247	0.15%	454	132391	0.34%
05010500	06040103	Macrolides	Progestogen Products Doubling (In House Use)	1129	774247	0.15%	321	132391	0.24%
05010101	13020102	Benzylpenicillin And Phenoxymethylpenicillin	Emollient Skin Preparations	1127	774247	0.15%	400	132391	0.30%
02090000	09060400	Antiplatelet Products	Vitamin D	1126	774247	0.15%	474	132391	0.36%
02080100	05010103	Parenteral Anticoagulants	Broad-Spectrum Penicillins	1122	774247	0.14%	534	132391	0.40%
06040103	13020102	Progestogen Products Doubling (In House Use)	Emollient Skin Preparations	1120	774247	0.14%	348	132391	0.26%
01010201	13090000	Compound Alginate Preparations	Shampoos And Other Preparations For Scalp And Hair Conditions	1119	774247	0.14%	456	132391	0.34%
05010102	10010100	Penicillinase-Resistant Penicillins	Non-Steroidal Anti-Inflammatory Drugs	1118	774247	0.14%	387	132391	0.29%
05010101	06040103	Benzylpenicillin And Phenoxymethylpenicillin	Progestogen Products Doubling (In House Use)	1114	774247	0.14%	235	132391	0.18%
10010100	12020101	Non-Steroidal Anti-Inflammatory Drugs	Corticosteroids Used In Nasal Allergy	1114	774247	0.14%	528	132391	0.40%
01030500	01070200	Proton Pump Inhibitors	Compound Haemorrhoid Products With Corticosteroids	1112	774247	0.14%	553	132391	0.42%
03040101	13020101	Non-Sedating Antihistamines	Emollient Bath Additives And Shower Preparations	1111	774247	0.14%	587	132391	0.44%
01060100	04030300	Bulk-Forming Laxatives	Selective Serotonin Re-Uptake Inhibitors (SSRI)	1105	774247	0.14%	750	132391	0.57%
04060000	04070200	Products Used Against Nausea And Vertigo	Opioid Analgesics	1100	774247	0.14%	652	132391	0.49%
02090000	13020102	Antiplatelet Products	Emollient Skin Preparations	1099	774247	0.14%	493	132391	0.37%
06040103	12020101	Progestogen Products Doubling (In House Use)	Corticosteroids Used In Nasal Allergy	1098	774247	0.14%	421	132391	0.32%
07020250	13090000	Preparations For Vaginal And Vulval Candidiasis	Shampoos And Other Preparations For Scalp And Hair Conditions	1097	774247	0.14%	427	132391	0.32%
04010100	04020101	Hypnotics	First-Generation Antipsychotic Drugs	1095	774247	0.14%	547	132391	0.41%
03010101	04010201	Selective Beta 2 Agonists	Benzodiazepines	1092	774247	0.14%	856	132391	0.65%
05010102	05010500	Penicillinase-Resistant Penicillins	Macrolides	1092	774247	0.14%	377	132391	0.28%
01010201	09060700	Compound Alginate Preparations	Multivitamin And Multimineral Preparations	1091	774247	0.14%	367	132391	0.28%
03040102	04020101	Sedating Antihistamines	First-Generation Antipsychotic Drugs	1090	774247	0.14%	428	132391	0.32%
01010201	06010102	Compound Alginate Preparations	Intermediate- And Long-Acting Insulins	1090	774247	0.14%	654	132391	0.49%
02090000	12020101	Antiplatelet Products	Corticosteroids Used In Nasal Allergy	1086	774247	0.14%	594	132391	0.45%
04030300	13020100	Selective Serotonin Re-Uptake Inhibitors (SSRI)	Emollients	1084	774247	0.14%	742	132391	0.56%
05010103	13090000	Broad-Spectrum Penicillins	Shampoos And Other Preparations For Scalp And Hair Conditions	1084	774247	0.14%	475	132391	0.36%
01030100	03040102	H2-Receptor Antagonists	Sedating Antihistamines	1083	774247	0.14%	466	132391	0.35%
05010500	10010100	Macrolides	Non-Steroidal Anti-Inflammatory Drugs	1083	774247	0.14%	468	132391	0.35%
09010101	71580200	Oral Iron	Emollient Ointment	1083	774247	0.14%	395	132391	0.30%
01050200	03040101	Corticosteroids In Chronic Bowel Problems	Non-Sedating Antihistamines	1080	774247	0.14%	684	132391	0.52%
03040101	05010500	Non-Sedating Antihistamines	Macrolides	1080	774247	0.14%	566	132391	0.43%
07020251	09010101	Preparations For Other Vaginal Infections	Oral Iron	1080	774247	0.14%	265	132391	0.20%
01010201	03090100	Compound Alginate Preparations	Cough Suppressants	1079	774247	0.14%	290	132391	0.22%
03040102	05010500	Sedating Antihistamines	Macrolides	1079	774247	0.14%	465	132391	0.35%
04030300	05011100	Selective Serotonin Re-Uptake Inhibitors (SSRI)	Metronidazole And Tinidazole	1077	774247	0.14%	636	132391	0.48%
04070100	13020103	Non-Opioid And Compound Analgesics	Antimicrobial Emollients	1077	774247	0.14%	467	132391	0.35%
01010000	07020250	Indigestion And GORD (Gastro-Oesophageal Reflux Disease)	Preparations For Vaginal And Vulval Candidiasis	1076	774247	0.14%	339	132391	0.26%
05010300	07020250	Tetracyclines	Preparations For Vaginal And Vulval Candidiasis	1075	774247	0.14%	388	132391	0.29%
04070100	09060700	Non-Opioid And Compound Analgesics	Multivitamin And Multimineral Preparations	1075	774247	0.14%	426	132391	0.32%
01060400	13020101	Osmotic Laxatives	Emollient Bath Additives And Shower Preparations	1073	774247	0.14%	471	132391	0.36%
01060400	04010201	Osmotic Laxatives	Benzodiazepines	1071	774247	0.14%	705	132391	0.53%
01030500	05010102	Proton Pump Inhibitors	Penicillinase-Resistant Penicillins	1070	774247	0.14%	536	132391	0.40%
01010000	05010103	Indigestion And GORD (Gastro-Oesophageal Reflux Disease)	Broad-Spectrum Penicillins	1070	774247	0.14%	335	132391	0.25%
04020101	13020102	First-Generation Antipsychotic Drugs	Emollient Skin Preparations	1070	774247	0.14%	436	132391	0.33%
04070100	13060102	Non-Opioid And Compound Analgesics	Topical Antibacterials For Acne	1067	774247	0.14%	381	132391	0.29%
05010500	05010800	Macrolides	Sulphonamides And Trimethoprim	1066	774247	0.14%	405	132391	0.31%
01060400	04065600	Osmotic Laxatives	Products Used Against Nausea And Vertigo - 5 HT3 Antagonists	1065	774247	0.14%	422	132391	0.32%
13020101	13020103	Emollient Bath Additives And Shower Preparations	Antimicrobial Emollients	1065	774247	0.14%	455	132391	0.34%
01070200	05010500	Compound Haemorrhoid Products With Corticosteroids	Macrolides	1064	774247	0.14%	383	132391	0.29%
12010151	13040000	Anti-Inflammatory Preparations	Topical Corticosteroids	1064	774247	0.14%	411	132391	0.31%
01030100	03020000	H2-Receptor Antagonists	Corticosteroids (For Respiratory Conditions)	1062	774247	0.14%	605	132391	0.46%
09010101	09020100	Oral Iron	Oral Preparations For Fluid And Electrolyte Imbalance	1062	774247	0.14%	328	132391	0.25%
04065400	13020102	Products Used Against Nausea And Vertigo - Antihistamines	Emollient Skin Preparations	1061	774247	0.14%	418	132391	0.32%
01060200	13040000	Stimulant Laxatives	Topical Corticosteroids	1061	774247	0.14%	462	132391	0.35%
13020102	13030000	Emollient Skin Preparations	Topical Local Anaesthetics And Antipruritics	1053	774247	0.14%	316	132391	0.24%
05010201	13040200	Cephalosporins	Mild Topical Corticosteroids	1050	774247	0.14%	333	132391	0.25%
11030100	12020101	Antibacterials (In Eye Preparation)	Corticosteroids Used In Nasal Allergy	1046	774247	0.14%	418	132391	0.32%
01060100	12020101	Bulk-Forming Laxatives	Corticosteroids Used In Nasal Allergy	1043	774247	0.13%	505	132391	0.38%
04060000	05010101	Products Used Against Nausea And Vertigo	Benzylpenicillin And Phenoxymethylpenicillin	1042	774247	0.13%	360	132391	0.27%
01010201	04070401	Compound Alginate Preparations	Acute Migraine	1041	774247	0.13%	532	132391	0.40%
04070100	05010300	Non-Opioid And Compound Analgesics	Tetracyclines	1040	774247	0.13%	432	132391	0.33%
04020101	04065600	First-Generation Antipsychotic Drugs	Products Used Against Nausea And Vertigo - 5 HT3 Antagonists	1035	774247	0.13%	378	132391	0.29%
03020000	06040103	Corticosteroids (For Respiratory Conditions)	Progestogen Products Doubling (In House Use)	1034	774247	0.13%	451	132391	0.34%
01050200	01060400	Corticosteroids In Chronic Bowel Problems	Osmotic Laxatives	1028	774247	0.13%	593	132391	0.45%
01010201	02080100	Compound Alginate Preparations	Parenteral Anticoagulants	1028	774247	0.13%	457	132391	0.35%
05010102	11030100	Penicillinase-Resistant Penicillins	Antibacterials (In Eye Preparation)	1028	774247	0.13%	291	132391	0.22%
07020250	09060700	Preparations For Vaginal And Vulval Candidiasis	Multivitamin And Multimineral Preparations	1023	774247	0.13%	342	132391	0.26%
05010103	12020300	Broad-Spectrum Penicillins	Nasal Preparations For Infection	1023	774247	0.13%	377	132391	0.28%
01070100	04070100	Soothing Haemorrhoid Products	Non-Opioid And Compound Analgesics	1021	774247	0.13%	381	132391	0.29%
01030100	03040101	H2-Receptor Antagonists	Non-Sedating Antihistamines	1018	774247	0.13%	578	132391	0.44%
04070401	05010103	Acute Migraine	Broad-Spectrum Penicillins	1018	774247	0.13%	552	132391	0.42%
04030100	05010201	Tricyclic And Related Antidepressants	Cephalosporins	1018	774247	0.13%	646	132391	0.49%
01050200	04030300	Corticosteroids In Chronic Bowel Problems	Selective Serotonin Re-Uptake Inhibitors (SSRI)	1017	774247	0.13%	855	132391	0.65%
01030500	03040102	Proton Pump Inhibitors	Sedating Antihistamines	1015	774247	0.13%	571	132391	0.43%
03010101	06010202	Selective Beta 2 Agonists	Biguanides (Metformin)	1015	774247	0.13%	723	132391	0.55%
10010100	13020102	Non-Steroidal Anti-Inflammatory Drugs	Emollient Skin Preparations	1015	774247	0.13%	416	132391	0.31%
01070200	03020000	Compound Haemorrhoid Products With Corticosteroids	Corticosteroids (For Respiratory Conditions)	1012	774247	0.13%	546	132391	0.41%
03020000	05010101	Corticosteroids (For Respiratory Conditions)	Benzylpenicillin And Phenoxymethylpenicillin	1010	774247	0.13%	475	132391	0.36%
01070200	05010102	Compound Haemorrhoid Products With Corticosteroids	Penicillinase-Resistant Penicillins	1006	774247	0.13%	340	132391	0.26%
01060400	09060400	Osmotic Laxatives	Vitamin D	1004	774247	0.13%	400	132391	0.30%
01060200	05010201	Stimulant Laxatives	Cephalosporins	1002	774247	0.13%	427	132391	0.32%
04010100	04010201	Hypnotics	Benzodiazepines	1000	774247	0.13%	763	132391	0.58%
04030300	13100101	Selective Serotonin Re-Uptake Inhibitors (SSRI)	Antibacterial Preparations Only Used Topically	1000	774247	0.13%	681	132391	0.51%
13040000	13100400	Topical Corticosteroids	Parasiticidal Preparations (Topical)	999	774247	0.13%	234	132391	0.18%
05010201	13020101	Cephalosporins	Emollient Bath Additives And Shower Preparations	998	774247	0.13%	417	132391	0.31%
06010202	13040000	Biguanides (Metformin)	Topical Corticosteroids	997	774247	0.13%	577	132391	0.44%
03010101	03030200	Selective Beta 2 Agonists	Leukotriene Receptor Antagonists	995	774247	0.13%	693	132391	0.52%
01030100	05010500	H2-Receptor Antagonists	Macrolides	995	774247	0.13%	464	132391	0.35%
01010201	05020100	Compound Alginate Preparations	Triazole Antifungals	995	774247	0.13%	355	132391	0.27%
01030500	05010800	Proton Pump Inhibitors	Sulphonamides And Trimethoprim	994	774247	0.13%	478	132391	0.36%
04070100	13100400	Non-Opioid And Compound Analgesics	Parasiticidal Preparations (Topical)	992	774247	0.13%	320	132391	0.24%
05010101	10010100	Benzylpenicillin And Phenoxymethylpenicillin	Non-Steroidal Anti-Inflammatory Drugs	987	774247	0.13%	319	132391	0.24%
09060400	13040000	Vitamin D	Topical Corticosteroids	986	774247	0.13%	427	132391	0.32%
01060400	02040000	Osmotic Laxatives	Beta-Adrenoceptor Blockers	985	774247	0.13%	586	132391	0.44%
01030500	06040103	Proton Pump Inhibitors	Progestogen Products Doubling (In House Use)	984	774247	0.13%	420	132391	0.32%
01060100	01070000	Bulk-Forming Laxatives	Local Products For Anal Or Rectal Problems	980	774247	0.13%	277	132391	0.21%
02090000	06020100	Antiplatelet Products	Thyroid Hormones	980	774247	0.13%	692	132391	0.52%
04060000	10010100	Products Used Against Nausea And Vertigo	Non-Steroidal Anti-Inflammatory Drugs	978	774247	0.13%	413	132391	0.31%
04030300	11040200	Selective Serotonin Re-Uptake Inhibitors (SSRI)	Other Anti-Inflammatory Eye Preparations (For The Eye)	977	774247	0.13%	718	132391	0.54%
01070100	01070200	Soothing Haemorrhoid Products	Compound Haemorrhoid Products With Corticosteroids	974	774247	0.13%	282	132391	0.21%
04020101	05010500	First-Generation Antipsychotic Drugs	Macrolides	974	774247	0.13%	398	132391	0.30%
01050100	09010101	Aminosalicylates	Oral Iron	973	774247	0.13%	517	132391	0.39%
05010500	05011100	Macrolides	Metronidazole And Tinidazole	972	774247	0.13%	333	132391	0.25%
07020100	07020250	Preparations For Vaginal And Vulval Changes	Preparations For Vaginal And Vulval Candidiasis	972	774247	0.13%	265	132391	0.20%
13020102	71580200	Emollient Skin Preparations	Emollient Ointment	971	774247	0.13%	393	132391	0.30%
03010000	13040000	Bronchodilators	Topical Corticosteroids	967	774247	0.12%	550	132391	0.42%
04065400	04065600	Products Used Against Nausea And Vertigo - Antihistamines	Products Used Against Nausea And Vertigo - 5 HT3 Antagonists	965	774247	0.12%	365	132391	0.28%
04030100	13040000	Tricyclic And Related Antidepressants	Topical Corticosteroids	965	774247	0.12%	645	132391	0.49%
01070200	04020101	Compound Haemorrhoid Products With Corticosteroids	First-Generation Antipsychotic Drugs	963	774247	0.12%	377	132391	0.28%
01010101	03010101	Aluminium- And Magnesium- Containing Antacids	Selective Beta 2 Agonists	962	774247	0.12%	475	132391	0.36%
04010100	04065400	Hypnotics	Products Used Against Nausea And Vertigo - Antihistamines	961	774247	0.12%	414	132391	0.31%
05010101	05010500	Benzylpenicillin And Phenoxymethylpenicillin	Macrolides	961	774247	0.12%	304	132391	0.23%
01040200	12020101	Antimotility Products	Corticosteroids Used In Nasal Allergy	959	774247	0.12%	523	132391	0.40%
11030100	13020102	Antibacterials (In Eye Preparation)	Emollient Skin Preparations	959	774247	0.12%	351	132391	0.27%
04070100	06040102	Non-Opioid And Compound Analgesics	Progestogens And Progesterone Receptor Modulators	958	774247	0.12%	423	132391	0.32%
09010101	12010100	Oral Iron	Drugs Acting On The Ear - Otitis Externa	956	774247	0.12%	242	132391	0.18%
01030500	01050200	Proton Pump Inhibitors	Corticosteroids In Chronic Bowel Problems	955	774247	0.12%	667	132391	0.50%
04020101	04070200	First-Generation Antipsychotic Drugs	Opioid Analgesics	955	774247	0.12%	454	132391	0.34%
04065600	05010103	Products Used Against Nausea And Vertigo - 5 HT3 Antagonists	Broad-Spectrum Penicillins	955	774247	0.12%	400	132391	0.30%
03010101	13020103	Selective Beta 2 Agonists	Antimicrobial Emollients	955	774247	0.12%	593	132391	0.45%
01030500	04030100	Proton Pump Inhibitors	Tricyclic And Related Antidepressants	953	774247	0.12%	704	132391	0.53%
03040102	04065400	Sedating Antihistamines	Products Used Against Nausea And Vertigo - Antihistamines	952	774247	0.12%	375	132391	0.28%
04030100	04070200	Tricyclic And Related Antidepressants	Opioid Analgesics	951	774247	0.12%	703	132391	0.53%
04070401	07020250	Acute Migraine	Preparations For Vaginal And Vulval Candidiasis	951	774247	0.12%	501	132391	0.38%
01060400	14040800	Osmotic Laxatives	Vaccines And Antisera - Diphtheria Vaccines	950	774247	0.12%	283	132391	0.21%
09010101	13070000	Oral Iron	Preparations For Warts And Calluses	946	774247	0.12%	191	132391	0.14%
02080100	07020250	Parenteral Anticoagulants	Preparations For Vaginal And Vulval Candidiasis	940	774247	0.12%	427	132391	0.32%
01060100	13020102	Bulk-Forming Laxatives	Emollient Skin Preparations	940	774247	0.12%	370	132391	0.28%
09010101	11080100	Oral Iron	Tear Deficiency	939	774247	0.12%	349	132391	0.26%
09010101	13060100	Oral Iron	Topical Preparations For Acne	938	774247	0.12%	268	132391	0.20%
03040101	10010100	Non-Sedating Antihistamines	Non-Steroidal Anti-Inflammatory Drugs	935	774247	0.12%	463	132391	0.35%
05010800	13020102	Sulphonamides And Trimethoprim	Emollient Skin Preparations	933	774247	0.12%	361	132391	0.27%
04070100	13100200	Non-Opioid And Compound Analgesics	Antifungal Preparations (Topical	929	774247	0.12%	358	132391	0.27%
02040000	13040000	Beta-Adrenoceptor Blockers	Topical Corticosteroids	926	774247	0.12%	561	132391	0.42%
06020100	12020101	Thyroid Hormones	Corticosteroids Used In Nasal Allergy	924	774247	0.12%	705	132391	0.53%
03020000	05011300	Corticosteroids (For Respiratory Conditions)	Urinary-Tract Infections	922	774247	0.12%	511	132391	0.39%
02080100	04070100	Parenteral Anticoagulants	Non-Opioid And Compound Analgesics	921	774247	0.12%	469	132391	0.35%
07020250	12020300	Preparations For Vaginal And Vulval Candidiasis	Nasal Preparations For Infection	921	774247	0.12%	312	132391	0.24%
03090100	04070100	Cough Suppressants	Non-Opioid And Compound Analgesics	918	774247	0.12%	276	132391	0.21%
04065400	05010500	Products Used Against Nausea And Vertigo - Antihistamines	Macrolides	917	774247	0.12%	369	132391	0.28%
01010000	04070100	Indigestion And GORD (Gastro-Oesophageal Reflux Disease)	Non-Opioid And Compound Analgesics	916	774247	0.12%	320	132391	0.24%
09010101	15020000	Oral Iron	Local Anaesthesia	915	774247	0.12%	239	132391	0.18%
04010100	04065500	Hypnotics	Products Used Against Nausea And Vertigo - Domperidone & Metoclopramide	914	774247	0.12%	392	132391	0.30%
04020102	04030300	Second-Generation Antipsychotic Drugs	Selective Serotonin Re-Uptake Inhibitors (SSRI)	913	774247	0.12%	823	132391	0.62%
01070200	05010101	Compound Haemorrhoid Products With Corticosteroids	Benzylpenicillin And Phenoxymethylpenicillin	913	774247	0.12%	292	132391	0.22%
05010103	05030201	Broad-Spectrum Penicillins	Herpes Simplex And Varicella-Zoster Infection	912	774247	0.12%	284	132391	0.21%
01010201	12020300	Compound Alginate Preparations	Nasal Preparations For Infection	912	774247	0.12%	314	132391	0.24%
05010102	13020101	Penicillinase-Resistant Penicillins	Emollient Bath Additives And Shower Preparations	910	774247	0.12%	409	132391	0.31%
04105100	13020102	Substance Dependence - Nicotine Dependence	Emollient Skin Preparations	908	774247	0.12%	364	132391	0.27%
05011100	06040103	Metronidazole And Tinidazole	Progestogen Products Doubling (In House Use)	905	774247	0.12%	231	132391	0.17%
07020250	71580200	Preparations For Vaginal And Vulval Candidiasis	Emollient Ointment	905	774247	0.12%	350	132391	0.26%
04065500	05011300	Products Used Against Nausea And Vertigo - Domperidone & Metoclopramide	Urinary-Tract Infections	904	774247	0.12%	370	132391	0.28%
01050200	13020102	Corticosteroids In Chronic Bowel Problems	Emollient Skin Preparations	904	774247	0.12%	586	132391	0.44%
03020000	13020101	Corticosteroids (For Respiratory Conditions)	Emollient Bath Additives And Shower Preparations	903	774247	0.12%	567	132391	0.43%
05010800	10010100	Sulphonamides And Trimethoprim	Non-Steroidal Anti-Inflammatory Drugs	902	774247	0.12%	374	132391	0.28%
03010101	09060400	Selective Beta 2 Agonists	Vitamin D	900	774247	0.12%	553	132391	0.42%
04030300	11030100	Selective Serotonin Re-Uptake Inhibitors (SSRI)	Antibacterials (In Eye Preparation)	899	774247	0.12%	608	132391	0.46%
01070200	03040102	Compound Haemorrhoid Products With Corticosteroids	Sedating Antihistamines	895	774247	0.12%	331	132391	0.25%
02040000	05010201	Beta-Adrenoceptor Blockers	Cephalosporins	895	774247	0.12%	516	132391	0.39%
05010500	11030100	Macrolides	Antibacterials (In Eye Preparation)	895	774247	0.12%	285	132391	0.22%
05010800	12020101	Sulphonamides And Trimethoprim	Corticosteroids Used In Nasal Allergy	895	774247	0.12%	382	132391	0.29%
01070200	10010100	Compound Haemorrhoid Products With Corticosteroids	Non-Steroidal Anti-Inflammatory Drugs	894	774247	0.12%	344	132391	0.26%
04070100	13090000	Non-Opioid And Compound Analgesics	Shampoos And Other Preparations For Scalp And Hair Conditions	893	774247	0.12%	415	132391	0.31%
05010500	13100101	Macrolides	Antibacterial Preparations Only Used Topically	893	774247	0.12%	328	132391	0.25%
05010103	09020100	Broad-Spectrum Penicillins	Oral Preparations For Fluid And Electrolyte Imbalance	892	774247	0.12%	301	132391	0.23%
01030500	04010100	Proton Pump Inhibitors	Hypnotics	891	774247	0.12%	581	132391	0.44%
03010000	05010201	Bronchodilators	Cephalosporins	890	774247	0.11%	430	132391	0.32%
13020102	13040200	Emollient Skin Preparations	Mild Topical Corticosteroids	890	774247	0.11%	298	132391	0.23%
03020000	04020101	Corticosteroids (For Respiratory Conditions)	First-Generation Antipsychotic Drugs	889	774247	0.11%	498	132391	0.38%
01010201	05010300	Compound Alginate Preparations	Tetracyclines	889	774247	0.11%	343	132391	0.26%
01040200	04065400	Antimotility Products	Products Used Against Nausea And Vertigo - Antihistamines	887	774247	0.11%	391	132391	0.30%
04010201	04070200	Benzodiazepines	Opioid Analgesics	886	774247	0.11%	658	132391	0.50%
04070100	12010300	Non-Opioid And Compound Analgesics	Drugs Acting On The Ear - Removal Of Ear Wax	886	774247	0.11%	293	132391	0.22%
02090000	06040102	Antiplatelet Products	Progestogens And Progesterone Receptor Modulators	885	774247	0.11%	315	132391	0.24%
01010201	12010300	Compound Alginate Preparations	Drugs Acting On The Ear - Removal Of Ear Wax	884	774247	0.11%	281	132391	0.21%
02090000	04020101	Antiplatelet Products	First-Generation Antipsychotic Drugs	883	774247	0.11%	351	132391	0.27%
01060400	13030000	Osmotic Laxatives	Topical Local Anaesthetics And Antipruritics	883	774247	0.11%	323	132391	0.24%
04070100	05020100	Non-Opioid And Compound Analgesics	Triazole Antifungals	882	774247	0.11%	391	132391	0.30%
07020250	12010300	Preparations For Vaginal And Vulval Candidiasis	Drugs Acting On The Ear - Removal Of Ear Wax	882	774247	0.11%	251	132391	0.19%
04010201	05010201	Benzodiazepines	Cephalosporins	881	774247	0.11%	565	132391	0.43%
04060000	06040103	Products Used Against Nausea And Vertigo	Progestogen Products Doubling (In House Use)	880	774247	0.11%	310	132391	0.23%
02050200	09010101	Centrally Acting Antihypertensive Products	Oral Iron	877	774247	0.11%	446	132391	0.34%
03020000	04065400	Corticosteroids (For Respiratory Conditions)	Products Used Against Nausea And Vertigo - Antihistamines	875	774247	0.11%	497	132391	0.38%
05010102	05011300	Penicillinase-Resistant Penicillins	Urinary-Tract Infections	875	774247	0.11%	310	132391	0.23%
01060400	13040200	Osmotic Laxatives	Mild Topical Corticosteroids	875	774247	0.11%	285	132391	0.22%
03010101	04030400	Selective Beta 2 Agonists	Other Antidepressants	873	774247	0.11%	784	132391	0.59%
01060200	01070200	Stimulant Laxatives	Compound Haemorrhoid Products With Corticosteroids	872	774247	0.11%	313	132391	0.24%
01060400	09010200	Osmotic Laxatives	Drugs Used In Megaloblastic Anaemias	871	774247	0.11%	382	132391	0.29%
13040000	13090100	Topical Corticosteroids	Shampoos And Other Scalp Preparations	869	774247	0.11%	416	132391	0.31%
04065400	05010800	Products Used Against Nausea And Vertigo - Antihistamines	Sulphonamides And Trimethoprim	867	774247	0.11%	302	132391	0.23%
04070100	14040200	Non-Opioid And Compound Analgesics	Vaccines And Antisera - Influenza Vaccines	867	774247	0.11%	312	132391	0.24%
01030500	05010101	Proton Pump Inhibitors	Benzylpenicillin And Phenoxymethylpenicillin	865	774247	0.11%	398	132391	0.30%
11030100	11040200	Antibacterials (In Eye Preparation)	Other Anti-Inflammatory Eye Preparations (For The Eye)	864	774247	0.11%	298	132391	0.23%
04020101	05010800	First-Generation Antipsychotic Drugs	Sulphonamides And Trimethoprim	863	774247	0.11%	326	132391	0.25%
06020100	13020102	Thyroid Hormones	Emollient Skin Preparations	863	774247	0.11%	554	132391	0.42%
02090000	05010102	Antiplatelet Products	Penicillinase-Resistant Penicillins	862	774247	0.11%	364	132391	0.27%
01010201	04065600	Compound Alginate Preparations	Products Used Against Nausea And Vertigo - 5 HT3 Antagonists	860	774247	0.11%	340	132391	0.26%
13040000	13040100	Topical Corticosteroids	Topical Corticosteroids With Antimicrobials	859	774247	0.11%	291	132391	0.22%
03020000	10010100	Corticosteroids (For Respiratory Conditions)	Non-Steroidal Anti-Inflammatory Drugs	858	774247	0.11%	482	132391	0.36%
01070200	03040101	Compound Haemorrhoid Products With Corticosteroids	Non-Sedating Antihistamines	857	774247	0.11%	428	132391	0.32%
04065500	04065600	Products Used Against Nausea And Vertigo - Domperidone & Metoclopramide	Products Used Against Nausea And Vertigo - 5 HT3 Antagonists	857	774247	0.11%	298	132391	0.23%
13040000	13060102	Topical Corticosteroids	Topical Antibacterials For Acne	856	774247	0.11%	292	132391	0.22%
10030250	13040000	Topical Nsaids And Counter Irritants	Topical Corticosteroids	855	774247	0.11%	342	132391	0.26%
01040200	05011300	Antimotility Products	Urinary-Tract Infections	854	774247	0.11%	378	132391	0.29%
01070000	13020102	Local Products For Anal Or Rectal Problems	Emollient Skin Preparations	854	774247	0.11%	273	132391	0.21%
13040000	13100300	Topical Corticosteroids	Antiviral Preparations (Topical	854	774247	0.11%	327	132391	0.25%
01030100	05010102	H2-Receptor Antagonists	Penicillinase-Resistant Penicillins	853	774247	0.11%	347	132391	0.26%
01060200	03010101	Stimulant Laxatives	Selective Beta 2 Agonists	847	774247	0.11%	528	132391	0.40%
04065500	12020101	Products Used Against Nausea And Vertigo - Domperidone & Metoclopramide	Corticosteroids Used In Nasal Allergy	847	774247	0.11%	411	132391	0.31%
01070000	04030300	Local Products For Anal Or Rectal Problems	Selective Serotonin Re-Uptake Inhibitors (SSRI)	846	774247	0.11%	539	132391	0.41%
01060100	04060000	Bulk-Forming Laxatives	Products Used Against Nausea And Vertigo	846	774247	0.11%	337	132391	0.25%
04010201	13040000	Benzodiazepines	Topical Corticosteroids	845	774247	0.11%	581	132391	0.44%
05010101	12030100	Benzylpenicillin And Phenoxymethylpenicillin	Drugs For Oral Ulceration And Inflammation	844	774247	0.11%	235	132391	0.18%
01040200	10010100	Antimotility Products	Non-Steroidal Anti-Inflammatory Drugs	841	774247	0.11%	396	132391	0.30%
09010101	13090100	Oral Iron	Shampoos And Other Scalp Preparations	841	774247	0.11%	320	132391	0.24%
04105100	05010102	Substance Dependence - Nicotine Dependence	Penicillinase-Resistant Penicillins	840	774247	0.11%	318	132391	0.24%
01030500	06020100	Proton Pump Inhibitors	Thyroid Hormones	838	774247	0.11%	643	132391	0.49%
05010103	07020251	Broad-Spectrum Penicillins	Preparations For Other Vaginal Infections	837	774247	0.11%	267	132391	0.20%
03040101	05011300	Non-Sedating Antihistamines	Urinary-Tract Infections	834	774247	0.11%	408	132391	0.31%
01060400	06010202	Osmotic Laxatives	Biguanides (Metformin)	834	774247	0.11%	470	132391	0.36%
01070200	04065400	Compound Haemorrhoid Products With Corticosteroids	Products Used Against Nausea And Vertigo - Antihistamines	832	774247	0.11%	335	132391	0.25%
01040200	13020102	Antimotility Products	Emollient Skin Preparations	832	774247	0.11%	409	132391	0.31%
05010201	12010151	Cephalosporins	Anti-Inflammatory Preparations	831	774247	0.11%	260	132391	0.20%
05010500	13020100	Macrolides	Emollients	831	774247	0.11%	315	132391	0.24%
01010101	01030100	Aluminium- And Magnesium- Containing Antacids	H2-Receptor Antagonists	826	774247	0.11%	266	132391	0.20%
01070200	05011300	Compound Haemorrhoid Products With Corticosteroids	Urinary-Tract Infections	826	774247	0.11%	294	132391	0.22%
04065600	07020250	Products Used Against Nausea And Vertigo - 5 HT3 Antagonists	Preparations For Vaginal And Vulval Candidiasis	826	774247	0.11%	342	132391	0.26%
01040200	03020000	Antimotility Products	Corticosteroids (For Respiratory Conditions)	825	774247	0.11%	519	132391	0.39%
09010200	13040000	Drugs Used In Megaloblastic Anaemias	Topical Corticosteroids	825	774247	0.11%	396	132391	0.30%
01040200	05010500	Antimotility Products	Macrolides	823	774247	0.11%	404	132391	0.31%
01060400	10030250	Osmotic Laxatives	Topical Nsaids And Counter Irritants	821	774247	0.11%	330	132391	0.25%
02090000	03020000	Antiplatelet Products	Corticosteroids (For Respiratory Conditions)	819	774247	0.11%	519	132391	0.39%
01030500	01060100	Proton Pump Inhibitors	Bulk-Forming Laxatives	818	774247	0.11%	420	132391	0.32%
01030500	02040000	Proton Pump Inhibitors	Beta-Adrenoceptor Blockers	817	774247	0.11%	610	132391	0.46%
01040200	04020101	Antimotility Products	First-Generation Antipsychotic Drugs	817	774247	0.11%	373	132391	0.28%
05011300	06040103	Urinary-Tract Infections	Progestogen Products Doubling (In House Use)	817	774247	0.11%	238	132391	0.18%
01040200	04070200	Antimotility Products	Opioid Analgesics	816	774247	0.11%	486	132391	0.37%
01030100	04070200	H2-Receptor Antagonists	Opioid Analgesics	815	774247	0.11%	479	132391	0.36%
01030100	10010100	H2-Receptor Antagonists	Non-Steroidal Anti-Inflammatory Drugs	814	774247	0.11%	387	132391	0.29%
06040102	13040000	Progestogens And Progesterone Receptor Modulators	Topical Corticosteroids	812	774247	0.10%	347	132391	0.26%
01070200	13020100	Compound Haemorrhoid Products With Corticosteroids	Emollients	811	774247	0.10%	298	132391	0.23%
04080100	09010101	Control Of Epilepsy	Oral Iron	810	774247	0.10%	445	132391	0.34%
04065400	05010102	Products Used Against Nausea And Vertigo - Antihistamines	Penicillinase-Resistant Penicillins	809	774247	0.10%	312	132391	0.24%
04010201	10010100	Benzodiazepines	Non-Steroidal Anti-Inflammatory Drugs	806	774247	0.10%	437	132391	0.33%
04030100	10010100	Tricyclic And Related Antidepressants	Non-Steroidal Anti-Inflammatory Drugs	804	774247	0.10%	479	132391	0.36%
03010101	09010200	Selective Beta 2 Agonists	Drugs Used In Megaloblastic Anaemias	803	774247	0.10%	513	132391	0.39%
09010101	13060101	Oral Iron	Benzoyl Peroxide And Azelaic Acid For Acne	803	774247	0.10%	208	132391	0.16%
01030100	04065600	H2-Receptor Antagonists	Products Used Against Nausea And Vertigo - 5 HT3 Antagonists	801	774247	0.10%	305	132391	0.23%
01060400	06040102	Osmotic Laxatives	Progestogens And Progesterone Receptor Modulators	801	774247	0.10%	330	132391	0.25%
01070200	06040103	Compound Haemorrhoid Products With Corticosteroids	Progestogen Products Doubling (In House Use)	801	774247	0.10%	216	132391	0.16%
03010000	12020101	Bronchodilators	Corticosteroids Used In Nasal Allergy	801	774247	0.10%	476	132391	0.36%
12020101	13020101	Corticosteroids Used In Nasal Allergy	Emollient Bath Additives And Shower Preparations	800	774247	0.10%	470	132391	0.36%
12030100	13040000	Drugs For Oral Ulceration And Inflammation	Topical Corticosteroids	799	774247	0.10%	293	132391	0.22%
05010103	71580200	Broad-Spectrum Penicillins	Emollient Ointment	798	774247	0.10%	330	132391	0.25%
04105100	06040103	Substance Dependence - Nicotine Dependence	Progestogen Products Doubling (In House Use)	797	774247	0.10%	233	132391	0.18%
05010102	05010800	Penicillinase-Resistant Penicillins	Sulphonamides And Trimethoprim	794	774247	0.10%	278	132391	0.21%
03040101	13030000	Non-Sedating Antihistamines	Topical Local Anaesthetics And Antipruritics	793	774247	0.10%	273	132391	0.21%
01060400	04030400	Osmotic Laxatives	Other Antidepressants	791	774247	0.10%	655	132391	0.49%
03090100	07020250	Cough Suppressants	Preparations For Vaginal And Vulval Candidiasis	791	774247	0.10%	237	132391	0.18%
03040101	04020101	Non-Sedating Antihistamines	First-Generation Antipsychotic Drugs	790	774247	0.10%	407	132391	0.31%
07020250	09020100	Preparations For Vaginal And Vulval Candidiasis	Oral Preparations For Fluid And Electrolyte Imbalance	790	774247	0.10%	265	132391	0.20%
12020101	13100101	Corticosteroids Used In Nasal Allergy	Antibacterial Preparations Only Used Topically	790	774247	0.10%	365	132391	0.28%
03020000	04105100	Corticosteroids (For Respiratory Conditions)	Substance Dependence - Nicotine Dependence	789	774247	0.10%	433	132391	0.33%
04060000	09020100	Products Used Against Nausea And Vertigo	Oral Preparations For Fluid And Electrolyte Imbalance	789	774247	0.10%	238	132391	0.18%
04020101	10010100	First-Generation Antipsychotic Drugs	Non-Steroidal Anti-Inflammatory Drugs	789	774247	0.10%	326	132391	0.25%
03040102	05010101	Sedating Antihistamines	Benzylpenicillin And Phenoxymethylpenicillin	787	774247	0.10%	276	132391	0.21%
03020000	05010800	Corticosteroids (For Respiratory Conditions)	Sulphonamides And Trimethoprim	787	774247	0.10%	423	132391	0.32%
11040200	13020100	Other Anti-Inflammatory Eye Preparations (For The Eye)	Emollients	786	774247	0.10%	338	132391	0.26%
01010201	71580200	Compound Alginate Preparations	Emollient Ointment	786	774247	0.10%	309	132391	0.23%
01060200	04060000	Stimulant Laxatives	Products Used Against Nausea And Vertigo	783	774247	0.10%	369	132391	0.28%
01060200	04030300	Stimulant Laxatives	Selective Serotonin Re-Uptake Inhibitors (SSRI)	781	774247	0.10%	590	132391	0.45%
01010201	09020100	Compound Alginate Preparations	Oral Preparations For Fluid And Electrolyte Imbalance	781	774247	0.10%	237	132391	0.18%
01040200	04065500	Antimotility Products	Products Used Against Nausea And Vertigo - Domperidone & Metoclopramide	780	774247	0.10%	332	132391	0.25%
03020000	11030100	Corticosteroids (For Respiratory Conditions)	Antibacterials (In Eye Preparation)	779	774247	0.10%	364	132391	0.27%
01010201	05030201	Compound Alginate Preparations	Herpes Simplex And Varicella-Zoster Infection	777	774247	0.10%	244	132391	0.18%
03010101	12010151	Selective Beta 2 Agonists	Anti-Inflammatory Preparations	777	774247	0.10%	414	132391	0.31%
03040102	05011300	Sedating Antihistamines	Urinary-Tract Infections	774	774247	0.10%	318	132391	0.24%
05010201	09010200	Cephalosporins	Drugs Used In Megaloblastic Anaemias	774	774247	0.10%	307	132391	0.23%
02090000	03040101	Antiplatelet Products	Non-Sedating Antihistamines	773	774247	0.10%	430	132391	0.32%
03010101	13040200	Selective Beta 2 Agonists	Mild Topical Corticosteroids	772	774247	0.10%	403	132391	0.30%
03040102	04065500	Sedating Antihistamines	Products Used Against Nausea And Vertigo - Domperidone & Metoclopramide	771	774247	0.10%	300	132391	0.23%
01020200	05010201	Other Antispasmodics	Cephalosporins	771	774247	0.10%	346	132391	0.26%
03010101	13030000	Selective Beta 2 Agonists	Topical Local Anaesthetics And Antipruritics	771	774247	0.10%	386	132391	0.29%
01020200	13040000	Other Antispasmodics	Topical Corticosteroids	770	774247	0.10%	392	132391	0.30%
03010101	14040200	Selective Beta 2 Agonists	Vaccines And Antisera - Influenza Vaccines	770	774247	0.10%	359	132391	0.27%
01010201	12010100	Compound Alginate Preparations	Drugs Acting On The Ear - Otitis Externa	769	774247	0.10%	244	132391	0.18%
07020250	13060100	Preparations For Vaginal And Vulval Candidiasis	Topical Preparations For Acne	768	774247	0.10%	238	132391	0.18%
04020101	05010102	First-Generation Antipsychotic Drugs	Penicillinase-Resistant Penicillins	767	774247	0.10%	306	132391	0.23%
01030100	05010800	H2-Receptor Antagonists	Sulphonamides And Trimethoprim	766	774247	0.10%	289	132391	0.22%
01010201	07020251	Compound Alginate Preparations	Preparations For Other Vaginal Infections	766	774247	0.10%	239	132391	0.18%
05010201	13030000	Cephalosporins	Topical Local Anaesthetics And Antipruritics	766	774247	0.10%	257	132391	0.19%
04010100	04030400	Hypnotics	Other Antidepressants	765	774247	0.10%	644	132391	0.49%
05010102	05011100	Penicillinase-Resistant Penicillins	Metronidazole And Tinidazole	765	774247	0.10%	245	132391	0.19%
03040102	10010100	Sedating Antihistamines	Non-Steroidal Anti-Inflammatory Drugs	765	774247	0.10%	325	132391	0.25%
01010201	11080100	Compound Alginate Preparations	Tear Deficiency	765	774247	0.10%	327	132391	0.25%
01010201	13070000	Compound Alginate Preparations	Preparations For Warts And Calluses	765	774247	0.10%	192	132391	0.15%
01070000	12020101	Local Products For Anal Or Rectal Problems	Corticosteroids Used In Nasal Allergy	764	774247	0.10%	322	132391	0.24%
01030100	01040200	H2-Receptor Antagonists	Antimotility Products	763	774247	0.10%	370	132391	0.28%
05010101	11030100	Benzylpenicillin And Phenoxymethylpenicillin	Antibacterials (In Eye Preparation)	763	774247	0.10%	210	132391	0.16%
01040200	05010102	Antimotility Products	Penicillinase-Resistant Penicillins	758	774247	0.10%	349	132391	0.26%
04060000	13020100	Products Used Against Nausea And Vertigo	Emollients	756	774247	0.10%	287	132391	0.22%
04030300	13020101	Selective Serotonin Re-Uptake Inhibitors (SSRI)	Emollient Bath Additives And Shower Preparations	753	774247	0.10%	545	132391	0.41%
04010100	04070200	Hypnotics	Opioid Analgesics	752	774247	0.10%	550	132391	0.42%
04020100	05010201	Antipsychotic Products	Cephalosporins	751	774247	0.10%	206	132391	0.16%
06010101	13040000	Short-Acting Insulins	Topical Corticosteroids	751	774247	0.10%	498	132391	0.38%
02040000	04060000	Beta-Adrenoceptor Blockers	Products Used Against Nausea And Vertigo	750	774247	0.10%	452	132391	0.34%
04020101	05010101	First-Generation Antipsychotic Drugs	Benzylpenicillin And Phenoxymethylpenicillin	750	774247	0.10%	255	132391	0.19%
04030300	06010202	Selective Serotonin Re-Uptake Inhibitors (SSRI)	Biguanides (Metformin)	750	774247	0.10%	626	132391	0.47%
04060000	06020100	Products Used Against Nausea And Vertigo	Thyroid Hormones	750	774247	0.10%	494	132391	0.37%
03010101	10030250	Selective Beta 2 Agonists	Topical Nsaids And Counter Irritants	750	774247	0.10%	427	132391	0.32%
01060400	12010151	Osmotic Laxatives	Anti-Inflammatory Preparations	749	774247	0.10%	304	132391	0.23%
03010101	12030100	Selective Beta 2 Agonists	Drugs For Oral Ulceration And Inflammation	749	774247	0.10%	372	132391	0.28%
04105100	05010500	Substance Dependence - Nicotine Dependence	Macrolides	748	774247	0.10%	317	132391	0.24%
05010201	12030100	Cephalosporins	Drugs For Oral Ulceration And Inflammation	748	774247	0.10%	263	132391	0.20%
05010101	05011300	Benzylpenicillin And Phenoxymethylpenicillin	Urinary-Tract Infections	747	774247	0.10%	241	132391	0.18%
02090000	05010500	Antiplatelet Products	Macrolides	746	774247	0.10%	375	132391	0.28%
05010103	11040100	Broad-Spectrum Penicillins	Corticosteroids (In Eye Preparations)	745	774247	0.10%	270	132391	0.20%
07020250	12010100	Preparations For Vaginal And Vulval Candidiasis	Drugs Acting On The Ear - Otitis Externa	744	774247	0.10%	234	132391	0.18%
04030300	14040800	Selective Serotonin Re-Uptake Inhibitors (SSRI)	Vaccines And Antisera - Diphtheria Vaccines	744	774247	0.10%	507	132391	0.38%
01030100	01060100	H2-Receptor Antagonists	Bulk-Forming Laxatives	743	774247	0.10%	304	132391	0.23%
01020200	03010101	Other Antispasmodics	Selective Beta 2 Agonists	743	774247	0.10%	500	132391	0.38%
03040101	05010101	Non-Sedating Antihistamines	Benzylpenicillin And Phenoxymethylpenicillin	742	774247	0.10%	291	132391	0.22%
07020250	15020000	Preparations For Vaginal And Vulval Candidiasis	Local Anaesthesia	742	774247	0.10%	253	132391	0.19%
01040200	01070200	Antimotility Products	Compound Haemorrhoid Products With Corticosteroids	741	774247	0.10%	329	132391	0.25%
04060000	09060400	Products Used Against Nausea And Vertigo	Vitamin D	741	774247	0.10%	275	132391	0.21%
13020100	13040200	Emollients	Mild Topical Corticosteroids	740	774247	0.10%	227	132391	0.17%
05010201	14040800	Cephalosporins	Vaccines And Antisera - Diphtheria Vaccines	739	774247	0.10%	226	132391	0.17%
01020200	04030300	Other Antispasmodics	Selective Serotonin Re-Uptake Inhibitors (SSRI)	738	774247	0.10%	547	132391	0.41%
13040000	71580100	Topical Corticosteroids	Emollient Cream	738	774247	0.10%	279	132391	0.21%
04010100	13020102	Hypnotics	Emollient Skin Preparations	737	774247	0.10%	385	132391	0.29%
05010103	15020000	Broad-Spectrum Penicillins	Local Anaesthesia	737	774247	0.10%	264	132391	0.20%
13020100	13030000	Emollients	Topical Local Anaesthetics And Antipruritics	734	774247	0.09%	207	132391	0.16%
04060000	14040800	Products Used Against Nausea And Vertigo	Vaccines And Antisera - Diphtheria Vaccines	734	774247	0.09%	214	132391	0.16%
06010102	13040000	Intermediate- And Long-Acting Insulins	Topical Corticosteroids	732	774247	0.09%	475	132391	0.36%
03040101	06020100	Non-Sedating Antihistamines	Thyroid Hormones	726	774247	0.09%	539	132391	0.41%
05020100	13040000	Triazole Antifungals	Topical Corticosteroids	726	774247	0.09%	292	132391	0.22%
03010101	03090200	Selective Beta 2 Agonists	Demulcent And Expectorant Cough Preparations	725	774247	0.09%	304	132391	0.23%
04070100	12020300	Non-Opioid And Compound Analgesics	Nasal Preparations For Infection	725	774247	0.09%	279	132391	0.21%
03040101	04065400	Non-Sedating Antihistamines	Products Used Against Nausea And Vertigo - Antihistamines	723	774247	0.09%	348	132391	0.26%
04065500	05010500	Products Used Against Nausea And Vertigo - Domperidone & Metoclopramide	Macrolides	723	774247	0.09%	303	132391	0.23%
01010201	09050101	Compound Alginate Preparations	Calcium Supplements	723	774247	0.09%	240	132391	0.18%
01060400	12030100	Osmotic Laxatives	Drugs For Oral Ulceration And Inflammation	722	774247	0.09%	264	132391	0.20%
01050200	03040102	Corticosteroids In Chronic Bowel Problems	Sedating Antihistamines	721	774247	0.09%	405	132391	0.31%
01070100	13040000	Soothing Haemorrhoid Products	Topical Corticosteroids	721	774247	0.09%	263	132391	0.20%
04010100	12020101	Hypnotics	Corticosteroids Used In Nasal Allergy	720	774247	0.09%	408	132391	0.31%
10010100	13020100	Non-Steroidal Anti-Inflammatory Drugs	Emollients	719	774247	0.09%	279	132391	0.21%
07020250	13070000	Preparations For Vaginal And Vulval Candidiasis	Preparations For Warts And Calluses	719	774247	0.09%	179	132391	0.14%
04070100	05030201	Non-Opioid And Compound Analgesics	Herpes Simplex And Varicella-Zoster Infection	718	774247	0.09%	234	132391	0.18%
04065400	05010101	Products Used Against Nausea And Vertigo - Antihistamines	Benzylpenicillin And Phenoxymethylpenicillin	716	774247	0.09%	224	132391	0.17%
01030500	04010201	Proton Pump Inhibitors	Benzodiazepines	715	774247	0.09%	559	132391	0.42%
01010201	13090100	Compound Alginate Preparations	Shampoos And Other Scalp Preparations	713	774247	0.09%	308	132391	0.23%
04065500	13020102	Products Used Against Nausea And Vertigo - Domperidone & Metoclopramide	Emollient Skin Preparations	712	774247	0.09%	309	132391	0.23%
01020200	01030500	Other Antispasmodics	Proton Pump Inhibitors	711	774247	0.09%	428	132391	0.32%
05010201	10030250	Cephalosporins	Topical Nsaids And Counter Irritants	711	774247	0.09%	262	132391	0.20%
01060100	03020000	Bulk-Forming Laxatives	Corticosteroids (For Respiratory Conditions)	707	774247	0.09%	411	132391	0.31%
04070100	09020100	Non-Opioid And Compound Analgesics	Oral Preparations For Fluid And Electrolyte Imbalance	707	774247	0.09%	264	132391	0.20%
01070200	02090000	Compound Haemorrhoid Products With Corticosteroids	Antiplatelet Products	706	774247	0.09%	291	132391	0.22%
01070000	04060000	Local Products For Anal Or Rectal Problems	Products Used Against Nausea And Vertigo	706	774247	0.09%	240	132391	0.18%
03040102	06040103	Sedating Antihistamines	Progestogen Products Doubling (In House Use)	706	774247	0.09%	214	132391	0.16%
07020250	13040100	Preparations For Vaginal And Vulval Candidiasis	Topical Corticosteroids With Antimicrobials	706	774247	0.09%	225	132391	0.17%
01030100	05010101	H2-Receptor Antagonists	Benzylpenicillin And Phenoxymethylpenicillin	705	774247	0.09%	271	132391	0.20%
07020100	09010101	Preparations For Vaginal And Vulval Changes	Oral Iron	704	774247	0.09%	183	132391	0.14%
04060000	11040200	Products Used Against Nausea And Vertigo	Other Anti-Inflammatory Eye Preparations (For The Eye)	704	774247	0.09%	327	132391	0.25%
13020102	13090000	Emollient Skin Preparations	Shampoos And Other Preparations For Scalp And Hair Conditions	704	774247	0.09%	318	132391	0.24%
01060400	13060102	Osmotic Laxatives	Topical Antibacterials For Acne	702	774247	0.09%	240	132391	0.18%
03020000	04065500	Corticosteroids (For Respiratory Conditions)	Products Used Against Nausea And Vertigo - Domperidone & Metoclopramide	700	774247	0.09%	405	132391	0.31%
02090000	04065400	Antiplatelet Products	Products Used Against Nausea And Vertigo - Antihistamines	699	774247	0.09%	285	132391	0.22%
05010201	09020102	Cephalosporins	Oral Sodium And Water	699	774247	0.09%	194	132391	0.15%
04020101	06040103	First-Generation Antipsychotic Drugs	Progestogen Products Doubling (In House Use)	698	774247	0.09%	237	132391	0.18%
04065400	10010100	Products Used Against Nausea And Vertigo - Antihistamines	Non-Steroidal Anti-Inflammatory Drugs	698	774247	0.09%	296	132391	0.22%
03040101	05010800	Non-Sedating Antihistamines	Sulphonamides And Trimethoprim	697	774247	0.09%	325	132391	0.25%
04065600	04070100	Products Used Against Nausea And Vertigo - 5 HT3 Antagonists	Non-Opioid And Compound Analgesics	695	774247	0.09%	315	132391	0.24%
03010101	06040102	Selective Beta 2 Agonists	Progestogens And Progesterone Receptor Modulators	695	774247	0.09%	401	132391	0.30%
01060100	05010500	Bulk-Forming Laxatives	Macrolides	693	774247	0.09%	260	132391	0.20%
13040000	13050200	Topical Corticosteroids	Preparations For Psoriasis	693	774247	0.09%	337	132391	0.25%
01060400	13020103	Osmotic Laxatives	Antimicrobial Emollients	691	774247	0.09%	296	132391	0.22%
01070200	05010800	Compound Haemorrhoid Products With Corticosteroids	Sulphonamides And Trimethoprim	690	774247	0.09%	244	132391	0.18%
01030500	06010202	Proton Pump Inhibitors	Biguanides (Metformin)	690	774247	0.09%	460	132391	0.35%
05010103	09050101	Broad-Spectrum Penicillins	Calcium Supplements	690	774247	0.09%	241	132391	0.18%
05010103	13060100	Broad-Spectrum Penicillins	Topical Preparations For Acne	690	774247	0.09%	245	132391	0.19%
05010500	11040200	Macrolides	Other Anti-Inflammatory Eye Preparations (For The Eye)	689	774247	0.09%	298	132391	0.23%
05010103	11080100	Broad-Spectrum Penicillins	Tear Deficiency	689	774247	0.09%	294	132391	0.22%
04060000	13100101	Products Used Against Nausea And Vertigo	Antibacterial Preparations Only Used Topically	689	774247	0.09%	294	132391	0.22%
01010201	15020000	Compound Alginate Preparations	Local Anaesthesia	689	774247	0.09%	235	132391	0.18%
02050200	05010103	Centrally Acting Antihypertensive Products	Broad-Spectrum Penicillins	688	774247	0.09%	382	132391	0.29%
05010201	09060400	Cephalosporins	Vitamin D	688	774247	0.09%	234	132391	0.18%
09010101	13040100	Oral Iron	Topical Corticosteroids With Antimicrobials	688	774247	0.09%	198	132391	0.15%
01070200	11030100	Compound Haemorrhoid Products With Corticosteroids	Antibacterials (In Eye Preparation)	687	774247	0.09%	197	132391	0.15%
01060100	13020100	Bulk-Forming Laxatives	Emollients	687	774247	0.09%	250	132391	0.19%
01030500	01060200	Proton Pump Inhibitors	Stimulant Laxatives	686	774247	0.09%	413	132391	0.31%
04060000	04105100	Products Used Against Nausea And Vertigo	Substance Dependence - Nicotine Dependence	686	774247	0.09%	288	132391	0.22%
05010101	05010800	Benzylpenicillin And Phenoxymethylpenicillin	Sulphonamides And Trimethoprim	685	774247	0.09%	207	132391	0.16%
05050100	09010101	Products For Threadworms	Oral Iron	685	774247	0.09%	165	132391	0.12%
04030300	09010200	Selective Serotonin Re-Uptake Inhibitors (SSRI)	Drugs Used In Megaloblastic Anaemias	684	774247	0.09%	479	132391	0.36%
03010101	06010101	Selective Beta 2 Agonists	Short-Acting Insulins	682	774247	0.09%	533	132391	0.40%
04070200	05010500	Opioid Analgesics	Macrolides	679	774247	0.09%	430	132391	0.32%
04010100	10010100	Hypnotics	Non-Steroidal Anti-Inflammatory Drugs	679	774247	0.09%	391	132391	0.30%
04030100	04060000	Tricyclic And Related Antidepressants	Products Used Against Nausea And Vertigo	678	774247	0.09%	477	132391	0.36%
05010201	13060102	Cephalosporins	Topical Antibacterials For Acne	678	774247	0.09%	217	132391	0.16%
04010201	04060000	Benzodiazepines	Products Used Against Nausea And Vertigo	676	774247	0.09%	464	132391	0.35%
01030500	09060400	Proton Pump Inhibitors	Vitamin D	676	774247	0.09%	377	132391	0.28%
01030100	01050200	H2-Receptor Antagonists	Corticosteroids In Chronic Bowel Problems	675	774247	0.09%	419	132391	0.32%
04030400	04060000	Other Antidepressants	Products Used Against Nausea And Vertigo	674	774247	0.09%	546	132391	0.41%
07020200	07020250	Vaginal And Vulval Infections	Preparations For Vaginal And Vulval Candidiasis	674	774247	0.09%	164	132391	0.12%
04030400	13040000	Other Antidepressants	Topical Corticosteroids	672	774247	0.09%	550	132391	0.42%
01030100	04010100	H2-Receptor Antagonists	Hypnotics	671	774247	0.09%	353	132391	0.27%
04010201	04030400	Benzodiazepines	Other Antidepressants	670	774247	0.09%	595	132391	0.45%
03010101	05010300	Selective Beta 2 Agonists	Tetracyclines	670	774247	0.09%	378	132391	0.29%
01060100	04020101	Bulk-Forming Laxatives	First-Generation Antipsychotic Drugs	667	774247	0.09%	278	132391	0.21%
04020100	04020101	Antipsychotic Products	First-Generation Antipsychotic Drugs	667	774247	0.09%	189	132391	0.14%
05011100	10010100	Metronidazole And Tinidazole	Non-Steroidal Anti-Inflammatory Drugs	667	774247	0.09%	249	132391	0.19%
01070200	11040200	Compound Haemorrhoid Products With Corticosteroids	Other Anti-Inflammatory Eye Preparations (For The Eye)	667	774247	0.09%	257	132391	0.19%
05011300	10010100	Urinary-Tract Infections	Non-Steroidal Anti-Inflammatory Drugs	666	774247	0.09%	269	132391	0.20%
13020100	13100101	Emollients	Antibacterial Preparations Only Used Topically	665	774247	0.09%	234	132391	0.18%
01050100	01050200	Aminosalicylates	Corticosteroids In Chronic Bowel Problems	662	774247	0.09%	368	132391	0.28%
07020250	11080100	Preparations For Vaginal And Vulval Candidiasis	Tear Deficiency	662	774247	0.09%	276	132391	0.21%
04030400	05010201	Other Antidepressants	Cephalosporins	661	774247	0.09%	529	132391	0.40%
04070100	12010100	Non-Opioid And Compound Analgesics	Drugs Acting On The Ear - Otitis Externa	661	774247	0.09%	226	132391	0.17%
02050200	02090000	Centrally Acting Antihypertensive Products	Antiplatelet Products	660	774247	0.09%	347	132391	0.26%
01070200	04065500	Compound Haemorrhoid Products With Corticosteroids	Products Used Against Nausea And Vertigo - Domperidone & Metoclopramide	659	774247	0.09%	272	132391	0.21%
04070100	15020000	Non-Opioid And Compound Analgesics	Local Anaesthesia	659	774247	0.09%	260	132391	0.20%
01010101	04030300	Aluminium- And Magnesium- Containing Antacids	Selective Serotonin Re-Uptake Inhibitors (SSRI)	658	774247	0.08%	439	132391	0.33%
04065500	10010100	Products Used Against Nausea And Vertigo - Domperidone & Metoclopramide	Non-Steroidal Anti-Inflammatory Drugs	658	774247	0.08%	288	132391	0.22%
06040103	13020100	Progestogen Products Doubling (In House Use)	Emollients	658	774247	0.08%	200	132391	0.15%
05010201	06010202	Cephalosporins	Biguanides (Metformin)	656	774247	0.08%	355	132391	0.27%
05010201	06010101	Cephalosporins	Short-Acting Insulins	654	774247	0.08%	406	132391	0.31%
04060000	09010200	Products Used Against Nausea And Vertigo	Drugs Used In Megaloblastic Anaemias	654	774247	0.08%	268	132391	0.20%
04010100	04030100	Hypnotics	Tricyclic And Related Antidepressants	653	774247	0.08%	483	132391	0.36%
01030500	04105100	Proton Pump Inhibitors	Substance Dependence - Nicotine Dependence	653	774247	0.08%	363	132391	0.27%
01030500	04030400	Proton Pump Inhibitors	Other Antidepressants	652	774247	0.08%	575	132391	0.43%
03090200	05010201	Demulcent And Expectorant Cough Preparations	Cephalosporins	651	774247	0.08%	202	132391	0.15%
04010100	05010500	Hypnotics	Macrolides	651	774247	0.08%	371	132391	0.28%
01060400	13100300	Osmotic Laxatives	Antiviral Preparations (Topical	651	774247	0.08%	239	132391	0.18%
01050200	04060000	Corticosteroids In Chronic Bowel Problems	Products Used Against Nausea And Vertigo	650	774247	0.08%	390	132391	0.29%
01010201	02050200	Compound Alginate Preparations	Centrally Acting Antihypertensive Products	649	774247	0.08%	326	132391	0.25%
01070200	04105100	Compound Haemorrhoid Products With Corticosteroids	Substance Dependence - Nicotine Dependence	649	774247	0.08%	220	132391	0.17%
03020000	06020100	Corticosteroids (For Respiratory Conditions)	Thyroid Hormones	649	774247	0.08%	555	132391	0.42%
04020102	09010101	Second-Generation Antipsychotic Drugs	Oral Iron	649	774247	0.08%	554	132391	0.42%
09010101	11040100	Oral Iron	Corticosteroids (In Eye Preparations)	649	774247	0.08%	215	132391	0.16%
05011100	13020102	Metronidazole And Tinidazole	Emollient Skin Preparations	649	774247	0.08%	237	132391	0.18%
01060400	03090200	Osmotic Laxatives	Demulcent And Expectorant Cough Preparations	647	774247	0.08%	201	132391	0.15%
02090000	05010101	Antiplatelet Products	Benzylpenicillin And Phenoxymethylpenicillin	646	774247	0.08%	274	132391	0.21%
01060100	03040102	Bulk-Forming Laxatives	Sedating Antihistamines	644	774247	0.08%	276	132391	0.21%
03040102	13020103	Sedating Antihistamines	Antimicrobial Emollients	644	774247	0.08%	251	132391	0.19%
01010201	13060100	Compound Alginate Preparations	Topical Preparations For Acne	644	774247	0.08%	217	132391	0.16%
01070200	06020100	Compound Haemorrhoid Products With Corticosteroids	Thyroid Hormones	641	774247	0.08%	388	132391	0.29%
04030300	12010151	Selective Serotonin Re-Uptake Inhibitors (SSRI)	Anti-Inflammatory Preparations	641	774247	0.08%	449	132391	0.34%
03040101	11030100	Non-Sedating Antihistamines	Antibacterials (In Eye Preparation)	640	774247	0.08%	277	132391	0.21%
13040000	14040200	Topical Corticosteroids	Vaccines And Antisera - Influenza Vaccines	639	774247	0.08%	219	132391	0.17%
02090000	03040102	Antiplatelet Products	Sedating Antihistamines	638	774247	0.08%	296	132391	0.22%
05010102	13020103	Penicillinase-Resistant Penicillins	Antimicrobial Emollients	638	774247	0.08%	253	132391	0.19%
03010101	06010102	Selective Beta 2 Agonists	Intermediate- And Long-Acting Insulins	637	774247	0.08%	497	132391	0.38%
07020250	09050101	Preparations For Vaginal And Vulval Candidiasis	Calcium Supplements	637	774247	0.08%	219	132391	0.17%
04065500	05010102	Products Used Against Nausea And Vertigo - Domperidone & Metoclopramide	Penicillinase-Resistant Penicillins	636	774247	0.08%	246	132391	0.19%
05010102	11040200	Penicillinase-Resistant Penicillins	Other Anti-Inflammatory Eye Preparations (For The Eye)	635	774247	0.08%	253	132391	0.19%
07020250	13060101	Preparations For Vaginal And Vulval Candidiasis	Benzoyl Peroxide And Azelaic Acid For Acne	635	774247	0.08%	175	132391	0.13%
04070100	11080100	Non-Opioid And Compound Analgesics	Tear Deficiency	634	774247	0.08%	305	132391	0.23%
07020250	13090100	Preparations For Vaginal And Vulval Candidiasis	Shampoos And Other Scalp Preparations	633	774247	0.08%	283	132391	0.21%
05010201	13100300	Cephalosporins	Antiviral Preparations (Topical	633	774247	0.08%	219	132391	0.17%
05010101	13020100	Benzylpenicillin And Phenoxymethylpenicillin	Emollients	632	774247	0.08%	189	132391	0.14%
01030100	06040103	H2-Receptor Antagonists	Progestogen Products Doubling (In House Use)	630	774247	0.08%	212	132391	0.16%
04105100	12020101	Substance Dependence - Nicotine Dependence	Corticosteroids Used In Nasal Allergy	630	774247	0.08%	292	132391	0.22%
01030500	13020100	Proton Pump Inhibitors	Emollients	629	774247	0.08%	328	132391	0.25%
03040102	04010100	Sedating Antihistamines	Hypnotics	628	774247	0.08%	326	132391	0.25%
03090200	13040000	Demulcent And Expectorant Cough Preparations	Topical Corticosteroids	628	774247	0.08%	193	132391	0.15%
05010102	12010151	Penicillinase-Resistant Penicillins	Anti-Inflammatory Preparations	627	774247	0.08%	214	132391	0.16%
04030300	06010101	Selective Serotonin Re-Uptake Inhibitors (SSRI)	Short-Acting Insulins	626	774247	0.08%	547	132391	0.41%
01030500	11040200	Proton Pump Inhibitors	Other Anti-Inflammatory Eye Preparations (For The Eye)	626	774247	0.08%	372	132391	0.28%
04105100	10010100	Substance Dependence - Nicotine Dependence	Non-Steroidal Anti-Inflammatory Drugs	625	774247	0.08%	254	132391	0.19%
05010201	06010102	Cephalosporins	Intermediate- And Long-Acting Insulins	624	774247	0.08%	402	132391	0.30%
03020000	13100101	Corticosteroids (For Respiratory Conditions)	Antibacterial Preparations Only Used Topically	624	774247	0.08%	330	132391	0.25%
12020101	14040800	Corticosteroids Used In Nasal Allergy	Vaccines And Antisera - Diphtheria Vaccines	623	774247	0.08%	242	132391	0.18%
03010101	13100300	Selective Beta 2 Agonists	Antiviral Preparations (Topical	622	774247	0.08%	357	132391	0.27%
01010101	04020101	Aluminium- And Magnesium- Containing Antacids	First-Generation Antipsychotic Drugs	621	774247	0.08%	219	132391	0.17%
01060100	03040101	Bulk-Forming Laxatives	Non-Sedating Antihistamines	620	774247	0.08%	327	132391	0.25%
01030100	02040000	H2-Receptor Antagonists	Beta-Adrenoceptor Blockers	619	774247	0.08%	376	132391	0.28%
04030300	06010102	Selective Serotonin Re-Uptake Inhibitors (SSRI)	Intermediate- And Long-Acting Insulins	618	774247	0.08%	529	132391	0.40%
03020000	04070200	Corticosteroids (For Respiratory Conditions)	Opioid Analgesics	617	774247	0.08%	432	132391	0.33%
04065400	06040103	Products Used Against Nausea And Vertigo - Antihistamines	Progestogen Products Doubling (In House Use)	617	774247	0.08%	208	132391	0.16%
04070100	09050101	Non-Opioid And Compound Analgesics	Calcium Supplements	616	774247	0.08%	231	132391	0.17%
05010103	12020250	Broad-Spectrum Penicillins	Sympathomimetics (Nasal Decongestants)	616	774247	0.08%	188	132391	0.14%
04020101	13020100	First-Generation Antipsychotic Drugs	Emollients	616	774247	0.08%	221	132391	0.17%
04070200	12020101	Opioid Analgesics	Corticosteroids Used In Nasal Allergy	615	774247	0.08%	382	132391	0.29%
02040000	02050200	Beta-Adrenoceptor Blockers	Centrally Acting Antihypertensive Products	614	774247	0.08%	324	132391	0.24%
03020000	04010100	Corticosteroids (For Respiratory Conditions)	Hypnotics	614	774247	0.08%	431	132391	0.33%
01060100	05010102	Bulk-Forming Laxatives	Penicillinase-Resistant Penicillins	614	774247	0.08%	223	132391	0.17%
06010101	06020100	Short-Acting Insulins	Thyroid Hormones	614	774247	0.08%	530	132391	0.40%
06040103	11030100	Progestogen Products Doubling (In House Use)	Antibacterials (In Eye Preparation)	614	774247	0.08%	149	132391	0.11%
01060100	10010100	Bulk-Forming Laxatives	Non-Steroidal Anti-Inflammatory Drugs	612	774247	0.08%	225	132391	0.17%
13020101	71580200	Emollient Bath Additives And Shower Preparations	Emollient Ointment	612	774247	0.08%	267	132391	0.20%
06010202	06020100	Biguanides (Metformin)	Thyroid Hormones	610	774247	0.08%	485	132391	0.37%
04060000	05011100	Products Used Against Nausea And Vertigo	Metronidazole And Tinidazole	609	774247	0.08%	206	132391	0.16%
05011100	05011300	Metronidazole And Tinidazole	Urinary-Tract Infections	609	774247	0.08%	220	132391	0.17%
05050100	07020250	Products For Threadworms	Preparations For Vaginal And Vulval Candidiasis	608	774247	0.08%	179	132391	0.14%
05010103	13090100	Broad-Spectrum Penicillins	Shampoos And Other Scalp Preparations	608	774247	0.08%	277	132391	0.21%
02090000	05010800	Antiplatelet Products	Sulphonamides And Trimethoprim	607	774247	0.08%	272	132391	0.21%
06040103	11040200	Progestogen Products Doubling (In House Use)	Other Anti-Inflammatory Eye Preparations (For The Eye)	607	774247	0.08%	204	132391	0.15%
01040200	03040102	Antimotility Products	Sedating Antihistamines	606	774247	0.08%	304	132391	0.23%
05010101	05011100	Benzylpenicillin And Phenoxymethylpenicillin	Metronidazole And Tinidazole	606	774247	0.08%	155	132391	0.12%
03040102	05010800	Sedating Antihistamines	Sulphonamides And Trimethoprim	605	774247	0.08%	233	132391	0.18%
01030100	06020100	H2-Receptor Antagonists	Thyroid Hormones	605	774247	0.08%	427	132391	0.32%
01030500	09010200	Proton Pump Inhibitors	Drugs Used In Megaloblastic Anaemias	604	774247	0.08%	362	132391	0.27%
01070200	13100101	Compound Haemorrhoid Products With Corticosteroids	Antibacterial Preparations Only Used Topically	604	774247	0.08%	215	132391	0.16%
04065400	09020100	Products Used Against Nausea And Vertigo - Antihistamines	Oral Preparations For Fluid And Electrolyte Imbalance	603	774247	0.08%	181	132391	0.14%
04065500	04070200	Products Used Against Nausea And Vertigo - Domperidone & Metoclopramide	Opioid Analgesics	602	774247	0.08%	337	132391	0.25%
09060700	13040000	Multivitamin And Multimineral Preparations	Topical Corticosteroids	602	774247	0.08%	236	132391	0.18%
01010000	01060400	Indigestion And GORD (Gastro-Oesophageal Reflux Disease)	Osmotic Laxatives	601	774247	0.08%	211	132391	0.16%
01050200	03010000	Corticosteroids In Chronic Bowel Problems	Bronchodilators	601	774247	0.08%	321	132391	0.24%
01060400	03010000	Osmotic Laxatives	Bronchodilators	601	774247	0.08%	336	132391	0.25%
04060000	11030100	Products Used Against Nausea And Vertigo	Antibacterials (In Eye Preparation)	601	774247	0.08%	208	132391	0.16%
01040200	06040103	Antimotility Products	Progestogen Products Doubling (In House Use)	599	774247	0.08%	238	132391	0.18%
04010201	04030100	Benzodiazepines	Tricyclic And Related Antidepressants	598	774247	0.08%	463	132391	0.35%
04080100	05010103	Control Of Epilepsy	Broad-Spectrum Penicillins	598	774247	0.08%	366	132391	0.28%
04030300	09060400	Selective Serotonin Re-Uptake Inhibitors (SSRI)	Vitamin D	598	774247	0.08%	446	132391	0.34%
03040101	13020103	Non-Sedating Antihistamines	Antimicrobial Emollients	598	774247	0.08%	300	132391	0.23%
01040200	03040101	Antimotility Products	Non-Sedating Antihistamines	597	774247	0.08%	354	132391	0.27%
01030500	05011100	Proton Pump Inhibitors	Metronidazole And Tinidazole	597	774247	0.08%	282	132391	0.21%
05010103	07020100	Broad-Spectrum Penicillins	Preparations For Vaginal And Vulval Changes	597	774247	0.08%	176	132391	0.13%
01050200	02090000	Corticosteroids In Chronic Bowel Problems	Antiplatelet Products	596	774247	0.08%	378	132391	0.29%
02040000	03010101	Beta-Adrenoceptor Blockers	Selective Beta 2 Agonists	596	774247	0.08%	421	132391	0.32%
05010103	13070000	Broad-Spectrum Penicillins	Preparations For Warts And Calluses	596	774247	0.08%	157	132391	0.12%
04065400	04070200	Products Used Against Nausea And Vertigo - Antihistamines	Opioid Analgesics	595	774247	0.08%	358	132391	0.27%
04065500	05010800	Products Used Against Nausea And Vertigo - Domperidone & Metoclopramide	Sulphonamides And Trimethoprim	594	774247	0.08%	228	132391	0.17%
01060100	05010101	Bulk-Forming Laxatives	Benzylpenicillin And Phenoxymethylpenicillin	593	774247	0.08%	202	132391	0.15%
03040102	13100101	Sedating Antihistamines	Antibacterial Preparations Only Used Topically	593	774247	0.08%	232	132391	0.18%
04070100	07020251	Non-Opioid And Compound Analgesics	Preparations For Other Vaginal Infections	592	774247	0.08%	222	132391	0.17%
01020200	01060100	Other Antispasmodics	Bulk-Forming Laxatives	591	774247	0.08%	282	132391	0.21%
05010201	05020100	Cephalosporins	Triazole Antifungals	591	774247	0.08%	223	132391	0.17%
06010102	06020100	Intermediate- And Long-Acting Insulins	Thyroid Hormones	591	774247	0.08%	514	132391	0.39%
09010101	13100102	Oral Iron	Antibacterial Preparations Also Used Systemically (For Skin Conditions)	590	774247	0.08%	192	132391	0.15%
03040102	11030100	Sedating Antihistamines	Antibacterials (In Eye Preparation)	588	774247	0.08%	216	132391	0.16%
04070200	13020102	Opioid Analgesics	Emollient Skin Preparations	588	774247	0.08%	349	132391	0.26%
01010201	13040100	Compound Alginate Preparations	Topical Corticosteroids With Antimicrobials	587	774247	0.08%	197	132391	0.15%
04070100	04080100	Non-Opioid And Compound Analgesics	Control Of Epilepsy	585	774247	0.08%	396	132391	0.30%
05010101	11040200	Benzylpenicillin And Phenoxymethylpenicillin	Other Anti-Inflammatory Eye Preparations (For The Eye)	585	774247	0.08%	211	132391	0.16%
01010101	13020102	Aluminium- And Magnesium- Containing Antacids	Emollient Skin Preparations	585	774247	0.08%	188	132391	0.14%
03040101	04065500	Non-Sedating Antihistamines	Products Used Against Nausea And Vertigo - Domperidone & Metoclopramide	583	774247	0.08%	303	132391	0.23%
05010103	05011200	Broad-Spectrum Penicillins	Quinolones	583	774247	0.08%	185	132391	0.14%
01060100	05011300	Bulk-Forming Laxatives	Urinary-Tract Infections	583	774247	0.08%	236	132391	0.18%
01030100	13020100	H2-Receptor Antagonists	Emollients	583	774247	0.08%	241	132391	0.18%
01010201	13060101	Compound Alginate Preparations	Benzoyl Peroxide And Azelaic Acid For Acne	583	774247	0.08%	190	132391	0.14%
03100000	05010103	Systemic Nasal Decongestants	Broad-Spectrum Penicillins	582	774247	0.08%	164	132391	0.12%
04020101	04030100	First-Generation Antipsychotic Drugs	Tricyclic And Related Antidepressants	581	774247	0.08%	397	132391	0.30%
03040102	04105100	Sedating Antihistamines	Substance Dependence - Nicotine Dependence	581	774247	0.08%	238	132391	0.18%
04065500	05010101	Products Used Against Nausea And Vertigo - Domperidone & Metoclopramide	Benzylpenicillin And Phenoxymethylpenicillin	581	774247	0.08%	194	132391	0.15%
04060000	09060700	Products Used Against Nausea And Vertigo	Multivitamin And Multimineral Preparations	581	774247	0.08%	213	132391	0.16%
01060400	13100200	Osmotic Laxatives	Antifungal Preparations (Topical	581	774247	0.08%	213	132391	0.16%
01040200	02090000	Antimotility Products	Antiplatelet Products	580	774247	0.07%	329	132391	0.25%
01030500	04065600	Proton Pump Inhibitors	Products Used Against Nausea And Vertigo - 5 HT3 Antagonists	580	774247	0.07%	293	132391	0.22%
04070100	13090100	Non-Opioid And Compound Analgesics	Shampoos And Other Scalp Preparations	580	774247	0.07%	273	132391	0.21%
13020102	14040800	Emollient Skin Preparations	Vaccines And Antisera - Diphtheria Vaccines	580	774247	0.07%	198	132391	0.15%
05010201	06040102	Cephalosporins	Progestogens And Progesterone Receptor Modulators	579	774247	0.07%	218	132391	0.16%
03040101	04070200	Non-Sedating Antihistamines	Opioid Analgesics	578	774247	0.07%	394	132391	0.30%
04020000	09010101	Products Used In Psychoses And Related Disorders	Oral Iron	578	774247	0.07%	327	132391	0.25%
01030100	01060200	H2-Receptor Antagonists	Stimulant Laxatives	577	774247	0.07%	275	132391	0.21%
04105100	05010101	Substance Dependence - Nicotine Dependence	Benzylpenicillin And Phenoxymethylpenicillin	577	774247	0.07%	189	132391	0.14%
05010500	12010151	Macrolides	Anti-Inflammatory Preparations	577	774247	0.07%	207	132391	0.16%
05010300	13040000	Tetracyclines	Topical Corticosteroids	576	774247	0.07%	296	132391	0.22%
04070200	05010102	Opioid Analgesics	Penicillinase-Resistant Penicillins	575	774247	0.07%	313	132391	0.24%
05010500	13020101	Macrolides	Emollient Bath Additives And Shower Preparations	575	774247	0.07%	265	132391	0.20%
01060400	14040200	Osmotic Laxatives	Vaccines And Antisera - Influenza Vaccines	575	774247	0.07%	196	132391	0.15%
01030100	04105100	H2-Receptor Antagonists	Substance Dependence - Nicotine Dependence	574	774247	0.07%	249	132391	0.19%
09060400	13020102	Vitamin D	Emollient Skin Preparations	574	774247	0.07%	238	132391	0.18%
03040101	04010100	Non-Sedating Antihistamines	Hypnotics	573	774247	0.07%	367	132391	0.28%
02080100	06040102	Parenteral Anticoagulants	Progestogens And Progesterone Receptor Modulators	573	774247	0.07%	209	132391	0.16%
01060100	04065400	Bulk-Forming Laxatives	Products Used Against Nausea And Vertigo - Antihistamines	572	774247	0.07%	217	132391	0.16%
01070100	05010201	Soothing Haemorrhoid Products	Cephalosporins	572	774247	0.07%	171	132391	0.13%
04065400	13020100	Products Used Against Nausea And Vertigo - Antihistamines	Emollients	572	774247	0.07%	214	132391	0.16%
03010101	13060102	Selective Beta 2 Agonists	Topical Antibacterials For Acne	572	774247	0.07%	288	132391	0.22%
01030100	01070000	H2-Receptor Antagonists	Local Products For Anal Or Rectal Problems	571	774247	0.07%	222	132391	0.17%
05011300	14040800	Urinary-Tract Infections	Vaccines And Antisera - Diphtheria Vaccines	571	774247	0.07%	182	132391	0.14%
01010101	01030500	Aluminium- And Magnesium- Containing Antacids	Proton Pump Inhibitors	570	774247	0.07%	226	132391	0.17%
05010800	05011100	Sulphonamides And Trimethoprim	Metronidazole And Tinidazole	570	774247	0.07%	192	132391	0.15%
04105100	05011300	Substance Dependence - Nicotine Dependence	Urinary-Tract Infections	570	774247	0.07%	200	132391	0.15%
05010103	13040100	Broad-Spectrum Penicillins	Topical Corticosteroids With Antimicrobials	570	774247	0.07%	207	132391	0.16%
01070000	05010500	Local Products For Anal Or Rectal Problems	Macrolides	569	774247	0.07%	193	132391	0.15%
02090000	10010100	Antiplatelet Products	Non-Steroidal Anti-Inflammatory Drugs	569	774247	0.07%	315	132391	0.24%
01040200	05010800	Antimotility Products	Sulphonamides And Trimethoprim	567	774247	0.07%	239	132391	0.18%
01040200	04030100	Antimotility Products	Tricyclic And Related Antidepressants	566	774247	0.07%	401	132391	0.30%
01060400	06010101	Osmotic Laxatives	Short-Acting Insulins	565	774247	0.07%	387	132391	0.29%
04030300	10030250	Selective Serotonin Re-Uptake Inhibitors (SSRI)	Topical Nsaids And Counter Irritants	565	774247	0.07%	403	132391	0.30%
09010101	13050200	Oral Iron	Preparations For Psoriasis	565	774247	0.07%	226	132391	0.17%
05010500	06020100	Macrolides	Thyroid Hormones	564	774247	0.07%	374	132391	0.28%
05011300	06020100	Urinary-Tract Infections	Thyroid Hormones	564	774247	0.07%	369	132391	0.28%
04065500	06040103	Products Used Against Nausea And Vertigo - Domperidone & Metoclopramide	Progestogen Products Doubling (In House Use)	564	774247	0.07%	189	132391	0.14%
01060400	09060700	Osmotic Laxatives	Multivitamin And Multimineral Preparations	563	774247	0.07%	245	132391	0.19%
05030201	13040000	Herpes Simplex And Varicella-Zoster Infection	Topical Corticosteroids	563	774247	0.07%	220	132391	0.17%
04070100	71580200	Non-Opioid And Compound Analgesics	Emollient Ointment	563	774247	0.07%	251	132391	0.19%
02080100	03010101	Parenteral Anticoagulants	Selective Beta 2 Agonists	562	774247	0.07%	362	132391	0.27%
04065400	09020102	Products Used Against Nausea And Vertigo - Antihistamines	Oral Sodium And Water	561	774247	0.07%	158	132391	0.12%
01070000	03020000	Local Products For Anal Or Rectal Problems	Corticosteroids (For Respiratory Conditions)	559	774247	0.07%	300	132391	0.23%
03010101	71580200	Selective Beta 2 Agonists	Emollient Ointment	559	774247	0.07%	369	132391	0.28%
10010100	11030100	Non-Steroidal Anti-Inflammatory Drugs	Antibacterials (In Eye Preparation)	558	774247	0.07%	186	132391	0.14%
05011100	12020101	Metronidazole And Tinidazole	Corticosteroids Used In Nasal Allergy	558	774247	0.07%	222	132391	0.17%
01060400	15020000	Osmotic Laxatives	Local Anaesthesia	558	774247	0.07%	198	132391	0.15%
01070200	05011100	Compound Haemorrhoid Products With Corticosteroids	Metronidazole And Tinidazole	557	774247	0.07%	190	132391	0.14%
12010151	12020101	Anti-Inflammatory Preparations	Corticosteroids Used In Nasal Allergy	557	774247	0.07%	236	132391	0.18%
01030500	13100101	Proton Pump Inhibitors	Antibacterial Preparations Only Used Topically	556	774247	0.07%	306	132391	0.23%
01030500	01070000	Proton Pump Inhibitors	Local Products For Anal Or Rectal Problems	555	774247	0.07%	248	132391	0.19%
09010101	12020250	Oral Iron	Sympathomimetics (Nasal Decongestants)	555	774247	0.07%	141	132391	0.11%
13020100	13020103	Emollients	Antimicrobial Emollients	555	774247	0.07%	242	132391	0.18%
10010100	10030250	Non-Steroidal Anti-Inflammatory Drugs	Topical Nsaids And Counter Irritants	554	774247	0.07%	219	132391	0.17%
05011300	13020100	Urinary-Tract Infections	Emollients	554	774247	0.07%	236	132391	0.18%
05010103	13060101	Broad-Spectrum Penicillins	Benzoyl Peroxide And Azelaic Acid For Acne	554	774247	0.07%	167	132391	0.13%
04010201	04020101	Benzodiazepines	First-Generation Antipsychotic Drugs	551	774247	0.07%	383	132391	0.29%
01070000	05010102	Local Products For Anal Or Rectal Problems	Penicillinase-Resistant Penicillins	551	774247	0.07%	179	132391	0.14%
05010103	06010400	Broad-Spectrum Penicillins	Treatment Of Hypoglycaemia	551	774247	0.07%	390	132391	0.29%
05010201	13100200	Cephalosporins	Antifungal Preparations (Topical	551	774247	0.07%	166	132391	0.13%
01030500	14040800	Proton Pump Inhibitors	Vaccines And Antisera - Diphtheria Vaccines	551	774247	0.07%	226	132391	0.17%
09010101	09060200	Oral Iron	Vitamin B Group	550	774247	0.07%	205	132391	0.15%
05010201	13020103	Cephalosporins	Antimicrobial Emollients	550	774247	0.07%	230	132391	0.17%
01040200	01060100	Antimotility Products	Bulk-Forming Laxatives	549	774247	0.07%	251	132391	0.19%
03020000	04030100	Corticosteroids (For Respiratory Conditions)	Tricyclic And Related Antidepressants	548	774247	0.07%	463	132391	0.35%
04030100	12020101	Tricyclic And Related Antidepressants	Corticosteroids Used In Nasal Allergy	547	774247	0.07%	397	132391	0.30%
04070100	13070000	Non-Opioid And Compound Analgesics	Preparations For Warts And Calluses	547	774247	0.07%	182	132391	0.14%
01040200	05010101	Antimotility Products	Benzylpenicillin And Phenoxymethylpenicillin	546	774247	0.07%	198	132391	0.15%
04030300	04065600	Selective Serotonin Re-Uptake Inhibitors (SSRI)	Products Used Against Nausea And Vertigo - 5 HT3 Antagonists	545	774247	0.07%	383	132391	0.29%
10010100	11040200	Non-Steroidal Anti-Inflammatory Drugs	Other Anti-Inflammatory Eye Preparations (For The Eye)	545	774247	0.07%	228	132391	0.17%
04030300	05010300	Selective Serotonin Re-Uptake Inhibitors (SSRI)	Tetracyclines	544	774247	0.07%	374	132391	0.28%
04060000	06010202	Products Used Against Nausea And Vertigo	Biguanides (Metformin)	542	774247	0.07%	273	132391	0.21%
05011200	09010101	Quinolones	Oral Iron	542	774247	0.07%	169	132391	0.13%
01060200	12020101	Stimulant Laxatives	Corticosteroids Used In Nasal Allergy	542	774247	0.07%	280	132391	0.21%
01010101	12020101	Aluminium- And Magnesium- Containing Antacids	Corticosteroids Used In Nasal Allergy	542	774247	0.07%	218	132391	0.16%
09060400	12020101	Vitamin D	Corticosteroids Used In Nasal Allergy	542	774247	0.07%	266	132391	0.20%
11030100	13020100	Antibacterials (In Eye Preparation)	Emollients	542	774247	0.07%	198	132391	0.15%
01010201	07020100	Compound Alginate Preparations	Preparations For Vaginal And Vulval Changes	541	774247	0.07%	166	132391	0.13%
01010101	01070200	Aluminium- And Magnesium- Containing Antacids	Compound Haemorrhoid Products With Corticosteroids	539	774247	0.07%	157	132391	0.12%
04010100	06040103	Hypnotics	Progestogen Products Doubling (In House Use)	539	774247	0.07%	242	132391	0.18%
01070000	13020100	Local Products For Anal Or Rectal Problems	Emollients	539	774247	0.07%	167	132391	0.13%
06040103	13100101	Progestogen Products Doubling (In House Use)	Antibacterial Preparations Only Used Topically	539	774247	0.07%	160	132391	0.12%
04020102	05010103	Second-Generation Antipsychotic Drugs	Broad-Spectrum Penicillins	538	774247	0.07%	462	132391	0.35%
01030100	11040200	H2-Receptor Antagonists	Other Anti-Inflammatory Eye Preparations (For The Eye)	538	774247	0.07%	242	132391	0.18%
01070200	04010100	Compound Haemorrhoid Products With Corticosteroids	Hypnotics	537	774247	0.07%	287	132391	0.22%
01050200	05010102	Corticosteroids In Chronic Bowel Problems	Penicillinase-Resistant Penicillins	537	774247	0.07%	328	132391	0.25%
05010201	09060700	Cephalosporins	Multivitamin And Multimineral Preparations	537	774247	0.07%	190	132391	0.14%
04070100	13060100	Non-Opioid And Compound Analgesics	Topical Preparations For Acne	537	774247	0.07%	207	132391	0.16%
01060400	02080100	Osmotic Laxatives	Parenteral Anticoagulants	536	774247	0.07%	262	132391	0.20%
05010201	05010300	Cephalosporins	Tetracyclines	536	774247	0.07%	216	132391	0.16%
03040102	04070200	Sedating Antihistamines	Opioid Analgesics	535	774247	0.07%	286	132391	0.22%
06010202	13020102	Biguanides (Metformin)	Emollient Skin Preparations	535	774247	0.07%	305	132391	0.23%
04030300	13060102	Selective Serotonin Re-Uptake Inhibitors (SSRI)	Topical Antibacterials For Acne	534	774247	0.07%	331	132391	0.25%
03040101	13100101	Non-Sedating Antihistamines	Antibacterial Preparations Only Used Topically	534	774247	0.07%	237	132391	0.18%
05010101	13100101	Benzylpenicillin And Phenoxymethylpenicillin	Antibacterial Preparations Only Used Topically	534	774247	0.07%	177	132391	0.13%
06010202	12020101	Biguanides (Metformin)	Corticosteroids Used In Nasal Allergy	533	774247	0.07%	340	132391	0.26%
01060400	13090000	Osmotic Laxatives	Shampoos And Other Preparations For Scalp And Hair Conditions	533	774247	0.07%	244	132391	0.18%
01030100	04030100	H2-Receptor Antagonists	Tricyclic And Related Antidepressants	532	774247	0.07%	365	132391	0.28%
04070200	06040103	Opioid Analgesics	Progestogen Products Doubling (In House Use)	532	774247	0.07%	247	132391	0.19%
01060100	06040103	Bulk-Forming Laxatives	Progestogen Products Doubling (In House Use)	532	774247	0.07%	173	132391	0.13%
05010201	13100400	Cephalosporins	Parasiticidal Preparations (Topical)	530	774247	0.07%	148	132391	0.11%
04020102	07020250	Second-Generation Antipsychotic Drugs	Preparations For Vaginal And Vulval Candidiasis	529	774247	0.07%	455	132391	0.34%
04020102	04070100	Second-Generation Antipsychotic Drugs	Non-Opioid And Compound Analgesics	528	774247	0.07%	468	132391	0.35%
03100000	09010101	Systemic Nasal Decongestants	Oral Iron	528	774247	0.07%	135	132391	0.10%
04010100	05010102	Hypnotics	Penicillinase-Resistant Penicillins	527	774247	0.07%	281	132391	0.21%
06010400	09010101	Treatment Of Hypoglycaemia	Oral Iron	526	774247	0.07%	342	132391	0.26%
01060200	13020102	Stimulant Laxatives	Emollient Skin Preparations	526	774247	0.07%	241	132391	0.18%
04070200	05011300	Opioid Analgesics	Urinary-Tract Infections	525	774247	0.07%	311	132391	0.23%
04030400	04070200	Other Antidepressants	Opioid Analgesics	524	774247	0.07%	459	132391	0.35%
06020100	09060400	Thyroid Hormones	Vitamin D	524	774247	0.07%	330	132391	0.25%
05010102	13040200	Penicillinase-Resistant Penicillins	Mild Topical Corticosteroids	524	774247	0.07%	167	132391	0.13%
04105100	05010800	Substance Dependence - Nicotine Dependence	Sulphonamides And Trimethoprim	523	774247	0.07%	191	132391	0.14%
01010201	05050100	Compound Alginate Preparations	Products For Threadworms	523	774247	0.07%	148	132391	0.11%
05010102	06020100	Penicillinase-Resistant Penicillins	Thyroid Hormones	523	774247	0.07%	327	132391	0.25%
03010000	13020102	Bronchodilators	Emollient Skin Preparations	523	774247	0.07%	305	132391	0.23%
01070000	04020101	Local Products For Anal Or Rectal Problems	First-Generation Antipsychotic Drugs	522	774247	0.07%	189	132391	0.14%
03040102	13040200	Sedating Antihistamines	Mild Topical Corticosteroids	522	774247	0.07%	199	132391	0.15%
04060000	09020102	Products Used Against Nausea And Vertigo	Oral Sodium And Water	521	774247	0.07%	143	132391	0.11%
05010800	13020100	Sulphonamides And Trimethoprim	Emollients	519	774247	0.07%	172	132391	0.13%
01040200	04010100	Antimotility Products	Hypnotics	518	774247	0.07%	313	132391	0.24%
03030200	05010103	Leukotriene Receptor Antagonists	Broad-Spectrum Penicillins	518	774247	0.07%	370	132391	0.28%
04010100	05011300	Hypnotics	Urinary-Tract Infections	518	774247	0.07%	265	132391	0.20%
03040102	06020100	Sedating Antihistamines	Thyroid Hormones	518	774247	0.07%	345	132391	0.26%
10010100	13100101	Non-Steroidal Anti-Inflammatory Drugs	Antibacterial Preparations Only Used Topically	518	774247	0.07%	208	132391	0.16%
05010103	12500200	Broad-Spectrum Penicillins	Nasal Spray	517	774247	0.07%	203	132391	0.15%
01010000	13040000	Indigestion And GORD (Gastro-Oesophageal Reflux Disease)	Topical Corticosteroids	517	774247	0.07%	177	132391	0.13%
01060100	01070100	Bulk-Forming Laxatives	Soothing Haemorrhoid Products	516	774247	0.07%	144	132391	0.11%
12020101	13040200	Corticosteroids Used In Nasal Allergy	Mild Topical Corticosteroids	516	774247	0.07%	214	132391	0.16%
01070000	03040102	Local Products For Anal Or Rectal Problems	Sedating Antihistamines	515	774247	0.07%	182	132391	0.14%
04030100	05010500	Tricyclic And Related Antidepressants	Macrolides	515	774247	0.07%	376	132391	0.28%
04020101	09020102	First-Generation Antipsychotic Drugs	Oral Sodium And Water	515	774247	0.07%	133	132391	0.10%
03040101	04105100	Non-Sedating Antihistamines	Substance Dependence - Nicotine Dependence	514	774247	0.07%	240	132391	0.18%
02090000	04070200	Antiplatelet Products	Opioid Analgesics	513	774247	0.07%	342	132391	0.26%
13020102	13090100	Emollient Skin Preparations	Shampoos And Other Scalp Preparations	513	774247	0.07%	243	132391	0.18%
04030300	09060700	Selective Serotonin Re-Uptake Inhibitors (SSRI)	Multivitamin And Multimineral Preparations	512	774247	0.07%	356	132391	0.27%
05011300	13100101	Urinary-Tract Infections	Antibacterial Preparations Only Used Topically	512	774247	0.07%	204	132391	0.15%
01060400	09020102	Osmotic Laxatives	Oral Sodium And Water	511	774247	0.07%	161	132391	0.12%
03010000	03040101	Bronchodilators	Non-Sedating Antihistamines	510	774247	0.07%	313	132391	0.24%
03010101	09060700	Selective Beta 2 Agonists	Multivitamin And Multimineral Preparations	510	774247	0.07%	280	132391	0.21%
01010201	11040100	Compound Alginate Preparations	Corticosteroids (In Eye Preparations)	510	774247	0.07%	200	132391	0.15%
03010101	13100200	Selective Beta 2 Agonists	Antifungal Preparations (Topical	510	774247	0.07%	266	132391	0.20%
07020200	09010101	Vaginal And Vulval Infections	Oral Iron	509	774247	0.07%	125	132391	0.09%
04105100	13020100	Substance Dependence - Nicotine Dependence	Emollients	509	774247	0.07%	205	132391	0.15%
02090000	09010200	Antiplatelet Products	Drugs Used In Megaloblastic Anaemias	508	774247	0.07%	216	132391	0.16%
04020101	11040200	First-Generation Antipsychotic Drugs	Other Anti-Inflammatory Eye Preparations (For The Eye)	508	774247	0.07%	238	132391	0.18%
05010500	12030100	Macrolides	Drugs For Oral Ulceration And Inflammation	508	774247	0.07%	192	132391	0.15%
02090000	04065500	Antiplatelet Products	Products Used Against Nausea And Vertigo - Domperidone & Metoclopramide	507	774247	0.07%	234	132391	0.18%
04030300	12030100	Selective Serotonin Re-Uptake Inhibitors (SSRI)	Drugs For Oral Ulceration And Inflammation	507	774247	0.07%	341	132391	0.26%
04065400	14040800	Products Used Against Nausea And Vertigo - Antihistamines	Vaccines And Antisera - Diphtheria Vaccines	507	774247	0.07%	172	132391	0.13%
01060400	04020100	Osmotic Laxatives	Antipsychotic Products	506	774247	0.07%	178	132391	0.13%
01040200	04105100	Antimotility Products	Substance Dependence - Nicotine Dependence	506	774247	0.07%	230	132391	0.17%
04080100	07020250	Control Of Epilepsy	Preparations For Vaginal And Vulval Candidiasis	506	774247	0.07%	311	132391	0.23%
04020100	04060000	Antipsychotic Products	Products Used Against Nausea And Vertigo	505	774247	0.07%	119	132391	0.09%
03010101	04070401	Selective Beta 2 Agonists	Acute Migraine	504	774247	0.07%	380	132391	0.29%
06010400	07020250	Treatment Of Hypoglycaemia	Preparations For Vaginal And Vulval Candidiasis	504	774247	0.07%	345	132391	0.26%
04020102	04030400	Second-Generation Antipsychotic Drugs	Other Antidepressants	503	774247	0.06%	474	132391	0.36%
01070200	04070200	Compound Haemorrhoid Products With Corticosteroids	Opioid Analgesics	503	774247	0.06%	266	132391	0.20%
05010300	05010500	Tetracyclines	Macrolides	503	774247	0.06%	227	132391	0.17%
03020000	05011100	Corticosteroids (For Respiratory Conditions)	Metronidazole And Tinidazole	503	774247	0.06%	255	132391	0.19%
03010101	03090100	Selective Beta 2 Agonists	Cough Suppressants	502	774247	0.06%	219	132391	0.17%
05011100	07020251	Metronidazole And Tinidazole	Preparations For Other Vaginal Infections	502	774247	0.06%	152	132391	0.11%
13020102	13100200	Emollient Skin Preparations	Antifungal Preparations (Topical	502	774247	0.06%	159	132391	0.12%
01030100	06010202	H2-Receptor Antagonists	Biguanides (Metformin)	501	774247	0.06%	287	132391	0.22%
01060400	05020100	Osmotic Laxatives	Triazole Antifungals	500	774247	0.06%	223	132391	0.17%
02090000	06040103	Antiplatelet Products	Progestogen Products Doubling (In House Use)	500	774247	0.06%	174	132391	0.13%
04020101	04030400	First-Generation Antipsychotic Drugs	Other Antidepressants	499	774247	0.06%	426	132391	0.32%
01060400	06010102	Osmotic Laxatives	Intermediate- And Long-Acting Insulins	499	774247	0.06%	344	132391	0.26%
04060000	12030100	Products Used Against Nausea And Vertigo	Drugs For Oral Ulceration And Inflammation	499	774247	0.06%	194	132391	0.15%
04030300	13030000	Selective Serotonin Re-Uptake Inhibitors (SSRI)	Topical Local Anaesthetics And Antipruritics	499	774247	0.06%	352	132391	0.27%
07020250	11040100	Preparations For Vaginal And Vulval Candidiasis	Corticosteroids (In Eye Preparations)	498	774247	0.06%	179	132391	0.14%
02040000	04020101	Beta-Adrenoceptor Blockers	First-Generation Antipsychotic Drugs	495	774247	0.06%	309	132391	0.23%
11040200	13020101	Other Anti-Inflammatory Eye Preparations (For The Eye)	Emollient Bath Additives And Shower Preparations	495	774247	0.06%	272	132391	0.21%
02080100	13040000	Parenteral Anticoagulants	Topical Corticosteroids	495	774247	0.06%	243	132391	0.18%
12020300	13040000	Nasal Preparations For Infection	Topical Corticosteroids	495	774247	0.06%	195	132391	0.15%
13020102	13100400	Emollient Skin Preparations	Parasiticidal Preparations (Topical)	494	774247	0.06%	123	132391	0.09%
03020000	14040800	Corticosteroids (For Respiratory Conditions)	Vaccines And Antisera - Diphtheria Vaccines	494	774247	0.06%	230	132391	0.17%
01060100	02090000	Bulk-Forming Laxatives	Antiplatelet Products	493	774247	0.06%	221	132391	0.17%
04060000	09060200	Products Used Against Nausea And Vertigo	Vitamin B Group	493	774247	0.06%	148	132391	0.11%
04030100	13020102	Tricyclic And Related Antidepressants	Emollient Skin Preparations	492	774247	0.06%	348	132391	0.26%
01020000	04070100	Antispasmodics And Products Affecting Motility	Non-Opioid And Compound Analgesics	490	774247	0.06%	256	132391	0.19%
01070000	05011300	Local Products For Anal Or Rectal Problems	Urinary-Tract Infections	490	774247	0.06%	171	132391	0.13%
01070200	13020101	Compound Haemorrhoid Products With Corticosteroids	Emollient Bath Additives And Shower Preparations	490	774247	0.06%	205	132391	0.15%
01030100	04010201	H2-Receptor Antagonists	Benzodiazepines	489	774247	0.06%	323	132391	0.24%
01060200	04020101	Stimulant Laxatives	First-Generation Antipsychotic Drugs	489	774247	0.06%	230	132391	0.17%
04070100	04070300	Non-Opioid And Compound Analgesics	Neuropathic Pain	489	774247	0.06%	351	132391	0.27%
01060100	05010800	Bulk-Forming Laxatives	Sulphonamides And Trimethoprim	488	774247	0.06%	192	132391	0.15%
04030100	06040103	Tricyclic And Related Antidepressants	Progestogen Products Doubling (In House Use)	487	774247	0.06%	259	132391	0.20%
02040000	12020101	Beta-Adrenoceptor Blockers	Corticosteroids Used In Nasal Allergy	487	774247	0.06%	286	132391	0.22%
01060400	04070401	Osmotic Laxatives	Acute Migraine	485	774247	0.06%	304	132391	0.23%
01070100	03010101	Soothing Haemorrhoid Products	Selective Beta 2 Agonists	484	774247	0.06%	267	132391	0.20%
01060100	04105100	Bulk-Forming Laxatives	Substance Dependence - Nicotine Dependence	484	774247	0.06%	190	132391	0.14%
05010101	06020100	Benzylpenicillin And Phenoxymethylpenicillin	Thyroid Hormones	483	774247	0.06%	307	132391	0.23%
01030500	11030100	Proton Pump Inhibitors	Antibacterials (In Eye Preparation)	483	774247	0.06%	229	132391	0.17%
01010201	13050200	Compound Alginate Preparations	Preparations For Psoriasis	483	774247	0.06%	204	132391	0.15%
03010000	04030300	Bronchodilators	Selective Serotonin Re-Uptake Inhibitors (SSRI)	482	774247	0.06%	384	132391	0.29%
01010101	04060000	Aluminium- And Magnesium- Containing Antacids	Products Used Against Nausea And Vertigo	482	774247	0.06%	138	132391	0.10%
04030300	13040200	Selective Serotonin Re-Uptake Inhibitors (SSRI)	Mild Topical Corticosteroids	482	774247	0.06%	313	132391	0.24%
05011300	11040200	Urinary-Tract Infections	Other Anti-Inflammatory Eye Preparations (For The Eye)	481	774247	0.06%	204	132391	0.15%
05010103	05050100	Broad-Spectrum Penicillins	Products For Threadworms	480	774247	0.06%	131	132391	0.10%
04065400	11040200	Products Used Against Nausea And Vertigo - Antihistamines	Other Anti-Inflammatory Eye Preparations (For The Eye)	478	774247	0.06%	196	132391	0.15%
07020250	13100102	Preparations For Vaginal And Vulval Candidiasis	Antibacterial Preparations Also Used Systemically (For Skin Conditions)	478	774247	0.06%	183	132391	0.14%
01040200	04010201	Antimotility Products	Benzodiazepines	477	774247	0.06%	310	132391	0.23%
04030100	04065400	Tricyclic And Related Antidepressants	Products Used Against Nausea And Vertigo - Antihistamines	477	774247	0.06%	313	132391	0.24%
05011200	07020250	Quinolones	Preparations For Vaginal And Vulval Candidiasis	477	774247	0.06%	163	132391	0.12%
04020101	13100101	First-Generation Antipsychotic Drugs	Antibacterial Preparations Only Used Topically	477	774247	0.06%	214	132391	0.16%
01050200	04020101	Corticosteroids In Chronic Bowel Problems	First-Generation Antipsychotic Drugs	476	774247	0.06%	285	132391	0.22%
05011300	09060400	Urinary-Tract Infections	Vitamin D	475	774247	0.06%	194	132391	0.15%
02090000	14040800	Antiplatelet Products	Vaccines And Antisera - Diphtheria Vaccines	475	774247	0.06%	158	132391	0.12%
12020101	13020103	Corticosteroids Used In Nasal Allergy	Antimicrobial Emollients	474	774247	0.06%	266	132391	0.20%
04070200	05010800	Opioid Analgesics	Sulphonamides And Trimethoprim	473	774247	0.06%	244	132391	0.18%
11080100	13040000	Tear Deficiency	Topical Corticosteroids	473	774247	0.06%	235	132391	0.18%
11040200	12020151	Other Anti-Inflammatory Eye Preparations (For The Eye)	Cromoglicate In Nasal Allergy	472	774247	0.06%	127	132391	0.10%
09020102	13040000	Oral Sodium And Water	Topical Corticosteroids	472	774247	0.06%	163	132391	0.12%
04020100	13040000	Antipsychotic Products	Topical Corticosteroids	471	774247	0.06%	153	132391	0.12%
02110000	09010101	Antifibrinolytic Products And Haemostatics	Oral Iron	470	774247	0.06%	182	132391	0.14%
04010201	05010500	Benzodiazepines	Macrolides	469	774247	0.06%	334	132391	0.25%
04105100	05011100	Substance Dependence - Nicotine Dependence	Metronidazole And Tinidazole	468	774247	0.06%	151	132391	0.11%
04030100	05011300	Tricyclic And Related Antidepressants	Urinary-Tract Infections	468	774247	0.06%	318	132391	0.24%
[truncated: 28,025 more rows]
