# Supplementary material for: Polypharmacy during pregnancy and associated risk factors: a retrospective analysis of 577 medication exposures among 1.5 million pregnancies in the UK, 2000-2019
Source: BMC Med. 2023 Jan 16;21:21. doi: 10.1186/s12916-022-02722-5 (PMC9843951; doi:10.1186/s12916-022-02722-5)
Supplement: Supplementary file 7 — Additional file 7: Table S4. Proportions of pregnancies with prescribed medication pairs – sensitivity analysis. [file 12916_2022_2722_MOESM7_ESM.xlsx]

## Sheet: Trimester1
Medications prescribed in pairs				All Pregnancies			Pregnancies of women with active multimorbidity
(BNF chapter and section)		Description		Numerator	Denominator	Estimated prescription percentage	Numerator	Denominator	Estimated prescription percentage
Drug 1	Drug 2	Drug1	Drug 2
03010101	03020000	Selective Beta 2 Agonists	Corticosteroids (For Respiratory Conditions)	15671	1521317	1.03%	7876	273975	2.87%
04030300	04070100	Selective Serotonin Re-Uptake Inhibitors (SSRI)	Non-Opioid And Compound Analgesics	7681	1521317	0.50%	5706	273975	2.08%
03010101	05010103	Selective Beta 2 Agonists	Broad-Spectrum Penicillins	9056	1521317	0.60%	4692	273975	1.71%
03010101	04030300	Selective Beta 2 Agonists	Selective Serotonin Re-Uptake Inhibitors (SSRI)	5371	1521317	0.35%	4685	273975	1.71%
04030300	05010103	Selective Serotonin Re-Uptake Inhibitors (SSRI)	Broad-Spectrum Penicillins	6086	1521317	0.40%	4178	273975	1.52%
04070100	05010103	Non-Opioid And Compound Analgesics	Broad-Spectrum Penicillins	9611	1521317	0.63%	3815	273975	1.39%
03010101	04070100	Selective Beta 2 Agonists	Non-Opioid And Compound Analgesics	5388	1521317	0.35%	3612	273975	1.32%
13020102	13040000	Emollient Skin Preparations	Topical Corticosteroids	8066	1521317	0.53%	3162	273975	1.15%
04070100	10010100	Non-Opioid And Compound Analgesics	Non-Steroidal Anti-Inflammatory Drugs	8152	1521317	0.54%	3145	273975	1.15%
04030300	06040103	Selective Serotonin Re-Uptake Inhibitors (SSRI)	Progestogen Products Doubling (In House Use)	5626	1521317	0.37%	3104	273975	1.13%
06010101	06010102	Short-Acting Insulins	Intermediate- And Long-Acting Insulins	4247	1521317	0.28%	3072	273975	1.12%
03010101	03040101	Selective Beta 2 Agonists	Non-Sedating Antihistamines	4395	1521317	0.29%	3071	273975	1.12%
03010101	13040000	Selective Beta 2 Agonists	Topical Corticosteroids	4311	1521317	0.28%	2988	273975	1.09%
01030500	04030300	Proton Pump Inhibitors	Selective Serotonin Re-Uptake Inhibitors (SSRI)	3626	1521317	0.24%	2977	273975	1.09%
04010100	04030300	Hypnotics	Selective Serotonin Re-Uptake Inhibitors (SSRI)	4200	1521317	0.28%	2975	273975	1.09%
01030500	04070100	Proton Pump Inhibitors	Non-Opioid And Compound Analgesics	4918	1521317	0.32%	2940	273975	1.07%
05010103	07020250	Broad-Spectrum Penicillins	Preparations For Vaginal And Vulval Candidiasis	8742	1521317	0.57%	2926	273975	1.07%
03010101	12020101	Selective Beta 2 Agonists	Corticosteroids Used In Nasal Allergy	3835	1521317	0.25%	2814	273975	1.03%
04030300	07020250	Selective Serotonin Re-Uptake Inhibitors (SSRI)	Preparations For Vaginal And Vulval Candidiasis	3816	1521317	0.25%	2623	273975	0.96%
04070100	04070200	Non-Opioid And Compound Analgesics	Opioid Analgesics	4109	1521317	0.27%	2578	273975	0.94%
04010201	04030300	Benzodiazepines	Selective Serotonin Re-Uptake Inhibitors (SSRI)	3250	1521317	0.21%	2573	273975	0.94%
03040101	12020101	Non-Sedating Antihistamines	Corticosteroids Used In Nasal Allergy	4527	1521317	0.30%	2391	273975	0.87%
04030300	13040000	Selective Serotonin Re-Uptake Inhibitors (SSRI)	Topical Corticosteroids	3231	1521317	0.21%	2329	273975	0.85%
01010201	04070100	Compound Alginate Preparations	Non-Opioid And Compound Analgesics	5242	1521317	0.34%	2289	273975	0.84%
04030300	04060000	Selective Serotonin Re-Uptake Inhibitors (SSRI)	Products Used Against Nausea And Vertigo	3164	1521317	0.21%	2289	273975	0.84%
01050200	03010101	Corticosteroids In Chronic Bowel Problems	Selective Beta 2 Agonists	3680	1521317	0.24%	2223	273975	0.81%
02040000	04030300	Beta-Adrenoceptor Blockers	Selective Serotonin Re-Uptake Inhibitors (SSRI)	2881	1521317	0.19%	2176	273975	0.79%
04070100	07020250	Non-Opioid And Compound Analgesics	Preparations For Vaginal And Vulval Candidiasis	4886	1521317	0.32%	2101	273975	0.77%
04030100	04070100	Tricyclic And Related Antidepressants	Non-Opioid And Compound Analgesics	3075	1521317	0.20%	2086	273975	0.76%
04030300	06020100	Selective Serotonin Re-Uptake Inhibitors (SSRI)	Thyroid Hormones	2165	1521317	0.14%	2025	273975	0.74%
03040101	04030300	Non-Sedating Antihistamines	Selective Serotonin Re-Uptake Inhibitors (SSRI)	2453	1521317	0.16%	1963	273975	0.72%
03010101	07020250	Selective Beta 2 Agonists	Preparations For Vaginal And Vulval Candidiasis	3261	1521317	0.21%	1950	273975	0.71%
01010201	04030300	Compound Alginate Preparations	Selective Serotonin Re-Uptake Inhibitors (SSRI)	2646	1521317	0.17%	1932	273975	0.71%
04030300	10010100	Selective Serotonin Re-Uptake Inhibitors (SSRI)	Non-Steroidal Anti-Inflammatory Drugs	2731	1521317	0.18%	1917	273975	0.70%
04030300	04070200	Selective Serotonin Re-Uptake Inhibitors (SSRI)	Opioid Analgesics	2255	1521317	0.15%	1902	273975	0.69%
01060400	04070100	Osmotic Laxatives	Non-Opioid And Compound Analgesics	4087	1521317	0.27%	1881	273975	0.69%
01030500	03010101	Proton Pump Inhibitors	Selective Beta 2 Agonists	2414	1521317	0.16%	1867	273975	0.68%
03020000	05010103	Corticosteroids (For Respiratory Conditions)	Broad-Spectrum Penicillins	3557	1521317	0.23%	1842	273975	0.67%
04030300	09010101	Selective Serotonin Re-Uptake Inhibitors (SSRI)	Oral Iron	2660	1521317	0.17%	1803	273975	0.66%
01060400	04030300	Osmotic Laxatives	Selective Serotonin Re-Uptake Inhibitors (SSRI)	2374	1521317	0.16%	1776	273975	0.65%
01010201	01030500	Compound Alginate Preparations	Proton Pump Inhibitors	3648	1521317	0.24%	1761	273975	0.64%
05010103	13040000	Broad-Spectrum Penicillins	Topical Corticosteroids	4042	1521317	0.27%	1756	273975	0.64%
01010201	03010101	Compound Alginate Preparations	Selective Beta 2 Agonists	2806	1521317	0.18%	1755	273975	0.64%
04010201	04070100	Benzodiazepines	Non-Opioid And Compound Analgesics	2719	1521317	0.18%	1751	273975	0.64%
03020000	04030300	Corticosteroids (For Respiratory Conditions)	Selective Serotonin Re-Uptake Inhibitors (SSRI)	1990	1521317	0.13%	1740	273975	0.64%
11040200	12020101	Other Anti-Inflammatory Eye Preparations (For The Eye)	Corticosteroids Used In Nasal Allergy	4468	1521317	0.29%	1732	273975	0.63%
04070100	13040000	Non-Opioid And Compound Analgesics	Topical Corticosteroids	3420	1521317	0.22%	1721	273975	0.63%
03010101	13020102	Selective Beta 2 Agonists	Emollient Skin Preparations	2319	1521317	0.15%	1644	273975	0.60%
04030400	04070100	Other Antidepressants	Non-Opioid And Compound Analgesics	1926	1521317	0.13%	1626	273975	0.59%
04030100	04030300	Tricyclic And Related Antidepressants	Selective Serotonin Re-Uptake Inhibitors (SSRI)	2072	1521317	0.14%	1625	273975	0.59%
01010201	05010103	Compound Alginate Preparations	Broad-Spectrum Penicillins	4295	1521317	0.28%	1597	273975	0.58%
03040101	13040000	Non-Sedating Antihistamines	Topical Corticosteroids	3174	1521317	0.21%	1550	273975	0.57%
04010100	04070100	Hypnotics	Non-Opioid And Compound Analgesics	2250	1521317	0.15%	1531	273975	0.56%
01050200	05010103	Corticosteroids In Chronic Bowel Problems	Broad-Spectrum Penicillins	2650	1521317	0.17%	1506	273975	0.55%
04020102	04030300	Second-Generation Antipsychotic Drugs	Selective Serotonin Re-Uptake Inhibitors (SSRI)	1628	1521317	0.11%	1504	273975	0.55%
04020101	04030300	First-Generation Antipsychotic Drugs	Selective Serotonin Re-Uptake Inhibitors (SSRI)	2092	1521317	0.14%	1501	273975	0.55%
03010101	06040103	Selective Beta 2 Agonists	Progestogen Products Doubling (In House Use)	3064	1521317	0.20%	1500	273975	0.55%
04070100	09010101	Non-Opioid And Compound Analgesics	Oral Iron	4107	1521317	0.27%	1497	273975	0.55%
07020250	13040000	Preparations For Vaginal And Vulval Candidiasis	Topical Corticosteroids	3783	1521317	0.25%	1478	273975	0.54%
13020101	13040000	Emollient Bath Additives And Shower Preparations	Topical Corticosteroids	3081	1521317	0.20%	1467	273975	0.54%
04070100	06040103	Non-Opioid And Compound Analgesics	Progestogen Products Doubling (In House Use)	4009	1521317	0.26%	1460	273975	0.53%
05010103	05010201	Broad-Spectrum Penicillins	Cephalosporins	4578	1521317	0.30%	1446	273975	0.53%
04060000	04070100	Products Used Against Nausea And Vertigo	Non-Opioid And Compound Analgesics	3053	1521317	0.20%	1431	273975	0.52%
04010100	04010201	Hypnotics	Benzodiazepines	1698	1521317	0.11%	1427	273975	0.52%
05010103	12020101	Broad-Spectrum Penicillins	Corticosteroids Used In Nasal Allergy	3061	1521317	0.20%	1424	273975	0.52%
03040101	04070100	Non-Sedating Antihistamines	Non-Opioid And Compound Analgesics	2300	1521317	0.15%	1403	273975	0.51%
01030500	05010103	Proton Pump Inhibitors	Broad-Spectrum Penicillins	2651	1521317	0.17%	1398	273975	0.51%
04030300	05010201	Selective Serotonin Re-Uptake Inhibitors (SSRI)	Cephalosporins	2074	1521317	0.14%	1383	273975	0.50%
03040101	11040200	Non-Sedating Antihistamines	Other Anti-Inflammatory Eye Preparations (For The Eye)	3032	1521317	0.20%	1376	273975	0.50%
04030300	12020101	Selective Serotonin Re-Uptake Inhibitors (SSRI)	Corticosteroids Used In Nasal Allergy	1648	1521317	0.11%	1369	273975	0.50%
03020000	04070100	Corticosteroids (For Respiratory Conditions)	Non-Opioid And Compound Analgesics	2079	1521317	0.14%	1368	273975	0.50%
01010201	07020250	Compound Alginate Preparations	Preparations For Vaginal And Vulval Candidiasis	3667	1521317	0.24%	1345	273975	0.49%
03010101	06020100	Selective Beta 2 Agonists	Thyroid Hormones	1466	1521317	0.10%	1334	273975	0.49%
03010101	05010500	Selective Beta 2 Agonists	Macrolides	2217	1521317	0.15%	1300	273975	0.47%
04070100	05010201	Non-Opioid And Compound Analgesics	Cephalosporins	3297	1521317	0.22%	1283	273975	0.47%
05010103	09010101	Broad-Spectrum Penicillins	Oral Iron	4222	1521317	0.28%	1281	273975	0.47%
13020100	13040000	Emollients	Topical Corticosteroids	3289	1521317	0.22%	1279	273975	0.47%
01060400	05010103	Osmotic Laxatives	Broad-Spectrum Penicillins	3386	1521317	0.22%	1269	273975	0.46%
04030300	04030400	Selective Serotonin Re-Uptake Inhibitors (SSRI)	Other Antidepressants	1656	1521317	0.11%	1260	273975	0.46%
13020101	13020102	Emollient Bath Additives And Shower Preparations	Emollient Skin Preparations	2834	1521317	0.19%	1255	273975	0.46%
04070100	06020100	Non-Opioid And Compound Analgesics	Thyroid Hormones	1652	1521317	0.11%	1254	273975	0.46%
05010201	07020250	Cephalosporins	Preparations For Vaginal And Vulval Candidiasis	3988	1521317	0.26%	1251	273975	0.46%
03010101	09010101	Selective Beta 2 Agonists	Oral Iron	2109	1521317	0.14%	1237	273975	0.45%
04060000	05010103	Products Used Against Nausea And Vertigo	Broad-Spectrum Penicillins	3305	1521317	0.22%	1232	273975	0.45%
05010103	06040103	Broad-Spectrum Penicillins	Progestogen Products Doubling (In House Use)	4698	1521317	0.31%	1218	273975	0.44%
05010103	10010100	Broad-Spectrum Penicillins	Non-Steroidal Anti-Inflammatory Drugs	3277	1521317	0.22%	1209	273975	0.44%
01060400	03010101	Osmotic Laxatives	Selective Beta 2 Agonists	1795	1521317	0.12%	1198	273975	0.44%
01010201	01060400	Compound Alginate Preparations	Osmotic Laxatives	3114	1521317	0.20%	1189	273975	0.43%
04010100	04030400	Hypnotics	Other Antidepressants	1378	1521317	0.09%	1187	273975	0.43%
04010201	04070200	Benzodiazepines	Opioid Analgesics	1420	1521317	0.09%	1173	273975	0.43%
04030300	04065400	Selective Serotonin Re-Uptake Inhibitors (SSRI)	Products Used Against Nausea And Vertigo - Antihistamines	1679	1521317	0.11%	1172	273975	0.43%
02040000	04070100	Beta-Adrenoceptor Blockers	Non-Opioid And Compound Analgesics	1649	1521317	0.11%	1166	273975	0.43%
01030500	04070200	Proton Pump Inhibitors	Opioid Analgesics	1536	1521317	0.10%	1166	273975	0.43%
03020000	12020101	Corticosteroids (For Respiratory Conditions)	Corticosteroids Used In Nasal Allergy	1612	1521317	0.11%	1156	273975	0.42%
04070100	12020101	Non-Opioid And Compound Analgesics	Corticosteroids Used In Nasal Allergy	1930	1521317	0.13%	1155	273975	0.42%
03020000	13040000	Corticosteroids (For Respiratory Conditions)	Topical Corticosteroids	1768	1521317	0.12%	1155	273975	0.42%
03010101	04070200	Selective Beta 2 Agonists	Opioid Analgesics	1389	1521317	0.09%	1153	273975	0.42%
03010101	04060000	Selective Beta 2 Agonists	Products Used Against Nausea And Vertigo	1795	1521317	0.12%	1148	273975	0.42%
05010103	06020100	Broad-Spectrum Penicillins	Thyroid Hormones	1695	1521317	0.11%	1139	273975	0.42%
04030100	04070200	Tricyclic And Related Antidepressants	Opioid Analgesics	1489	1521317	0.10%	1136	273975	0.41%
04020101	04060000	First-Generation Antipsychotic Drugs	Products Used Against Nausea And Vertigo	3475	1521317	0.23%	1133	273975	0.41%
01010201	09010101	Compound Alginate Preparations	Oral Iron	3897	1521317	0.26%	1127	273975	0.41%
04060000	04065400	Products Used Against Nausea And Vertigo	Products Used Against Nausea And Vertigo - Antihistamines	3529	1521317	0.23%	1124	273975	0.41%
03020000	03040101	Corticosteroids (For Respiratory Conditions)	Non-Sedating Antihistamines	1634	1521317	0.11%	1095	273975	0.40%
03010101	03030200	Selective Beta 2 Agonists	Leukotriene Receptor Antagonists	1498	1521317	0.10%	1087	273975	0.40%
03040101	05010103	Non-Sedating Antihistamines	Broad-Spectrum Penicillins	2095	1521317	0.14%	1085	273975	0.40%
04070200	10010100	Opioid Analgesics	Non-Steroidal Anti-Inflammatory Drugs	1859	1521317	0.12%	1084	273975	0.40%
04030300	05010500	Selective Serotonin Re-Uptake Inhibitors (SSRI)	Macrolides	1516	1521317	0.10%	1083	273975	0.40%
04010201	04030400	Benzodiazepines	Other Antidepressants	1187	1521317	0.08%	1056	273975	0.39%
01040200	04070100	Antimotility Products	Non-Opioid And Compound Analgesics	1981	1521317	0.13%	1041	273975	0.38%
03010101	05010201	Selective Beta 2 Agonists	Cephalosporins	1866	1521317	0.12%	1040	273975	0.38%
03010101	04030400	Selective Beta 2 Agonists	Other Antidepressants	1108	1521317	0.07%	1036	273975	0.38%
03010000	03020000	Bronchodilators	Corticosteroids (For Respiratory Conditions)	2104	1521317	0.14%	1030	273975	0.38%
04030300	13020102	Selective Serotonin Re-Uptake Inhibitors (SSRI)	Emollient Skin Preparations	1348	1521317	0.09%	1025	273975	0.37%
04030300	05010800	Selective Serotonin Re-Uptake Inhibitors (SSRI)	Sulphonamides And Trimethoprim	1548	1521317	0.10%	1020	273975	0.37%
03010101	04010100	Selective Beta 2 Agonists	Hypnotics	1263	1521317	0.08%	1019	273975	0.37%
03010000	03010101	Bronchodilators	Selective Beta 2 Agonists	1711	1521317	0.11%	1016	273975	0.37%
03010101	10010100	Selective Beta 2 Agonists	Non-Steroidal Anti-Inflammatory Drugs	1545	1521317	0.10%	1015	273975	0.37%
01060400	07020250	Osmotic Laxatives	Preparations For Vaginal And Vulval Candidiasis	2735	1521317	0.18%	1002	273975	0.37%
04030300	05011300	Selective Serotonin Re-Uptake Inhibitors (SSRI)	Urinary-Tract Infections	1390	1521317	0.09%	1002	273975	0.37%
04070100	05010500	Non-Opioid And Compound Analgesics	Macrolides	2167	1521317	0.14%	1000	273975	0.36%
04060000	04065500	Products Used Against Nausea And Vertigo	Products Used Against Nausea And Vertigo - Domperidone & Metoclopramide	2952	1521317	0.19%	996	273975	0.36%
01030500	04030100	Proton Pump Inhibitors	Tricyclic And Related Antidepressants	1306	1521317	0.09%	996	273975	0.36%
04020101	04070100	First-Generation Antipsychotic Drugs	Non-Opioid And Compound Analgesics	2167	1521317	0.14%	995	273975	0.36%
04030300	04065500	Selective Serotonin Re-Uptake Inhibitors (SSRI)	Products Used Against Nausea And Vertigo - Domperidone & Metoclopramide	1420	1521317	0.09%	995	273975	0.36%
01030500	10010100	Proton Pump Inhibitors	Non-Steroidal Anti-Inflammatory Drugs	1716	1521317	0.11%	987	273975	0.36%
03010101	11040200	Selective Beta 2 Agonists	Other Anti-Inflammatory Eye Preparations (For The Eye)	1503	1521317	0.10%	985	273975	0.36%
03010101	04030100	Selective Beta 2 Agonists	Tricyclic And Related Antidepressants	1146	1521317	0.08%	982	273975	0.36%
01060200	01060400	Stimulant Laxatives	Osmotic Laxatives	2394	1521317	0.16%	964	273975	0.35%
04030300	05010102	Selective Serotonin Re-Uptake Inhibitors (SSRI)	Penicillinase-Resistant Penicillins	1415	1521317	0.09%	949	273975	0.35%
07020250	09010101	Preparations For Vaginal And Vulval Candidiasis	Oral Iron	3403	1521317	0.22%	942	273975	0.34%
06020100	09010101	Thyroid Hormones	Oral Iron	1511	1521317	0.10%	934	273975	0.34%
04010100	05010103	Hypnotics	Broad-Spectrum Penicillins	1604	1521317	0.11%	932	273975	0.34%
04030300	04105100	Selective Serotonin Re-Uptake Inhibitors (SSRI)	Substance Dependence - Nicotine Dependence	1313	1521317	0.09%	929	273975	0.34%
01030500	04060000	Proton Pump Inhibitors	Products Used Against Nausea And Vertigo	1734	1521317	0.11%	927	273975	0.34%
04020102	04030400	Second-Generation Antipsychotic Drugs	Other Antidepressants	972	1521317	0.06%	927	273975	0.34%
04070200	05010103	Opioid Analgesics	Broad-Spectrum Penicillins	1483	1521317	0.10%	916	273975	0.33%
03010101	04010201	Selective Beta 2 Agonists	Benzodiazepines	1064	1521317	0.07%	912	273975	0.33%
01030500	01060400	Proton Pump Inhibitors	Osmotic Laxatives	1519	1521317	0.10%	911	273975	0.33%
04010100	04070200	Hypnotics	Opioid Analgesics	1133	1521317	0.07%	900	273975	0.33%
01030500	03040101	Proton Pump Inhibitors	Non-Sedating Antihistamines	1216	1521317	0.08%	899	273975	0.33%
05010103	05010500	Broad-Spectrum Penicillins	Macrolides	2433	1521317	0.16%	893	273975	0.33%
04030400	05010103	Other Antidepressants	Broad-Spectrum Penicillins	1051	1521317	0.07%	888	273975	0.32%
06040103	13040000	Progestogen Products Doubling (In House Use)	Topical Corticosteroids	2929	1521317	0.19%	883	273975	0.32%
01010201	04060000	Compound Alginate Preparations	Products Used Against Nausea And Vertigo	2533	1521317	0.17%	878	273975	0.32%
03010101	13020101	Selective Beta 2 Agonists	Emollient Bath Additives And Shower Preparations	1140	1521317	0.07%	878	273975	0.32%
01010201	13040000	Compound Alginate Preparations	Topical Corticosteroids	2014	1521317	0.13%	870	273975	0.32%
02090000	04030300	Antiplatelet Products	Selective Serotonin Re-Uptake Inhibitors (SSRI)	1157	1521317	0.08%	869	273975	0.32%
01030500	04030400	Proton Pump Inhibitors	Other Antidepressants	936	1521317	0.06%	855	273975	0.31%
12020101	13040000	Corticosteroids Used In Nasal Allergy	Topical Corticosteroids	1443	1521317	0.09%	849	273975	0.31%
04030400	04070200	Other Antidepressants	Opioid Analgesics	945	1521317	0.06%	849	273975	0.31%
04020101	05010103	First-Generation Antipsychotic Drugs	Broad-Spectrum Penicillins	2213	1521317	0.15%	848	273975	0.31%
03040101	13020102	Non-Sedating Antihistamines	Emollient Skin Preparations	1645	1521317	0.11%	847	273975	0.31%
06010101	06010400	Short-Acting Insulins	Treatment Of Hypoglycaemia	1134	1521317	0.07%	845	273975	0.31%
06010102	06010400	Intermediate- And Long-Acting Insulins	Treatment Of Hypoglycaemia	1144	1521317	0.08%	844	273975	0.31%
01030500	09010101	Proton Pump Inhibitors	Oral Iron	1490	1521317	0.10%	838	273975	0.31%
04010201	05010103	Benzodiazepines	Broad-Spectrum Penicillins	1165	1521317	0.08%	837	273975	0.31%
01030500	07020250	Proton Pump Inhibitors	Preparations For Vaginal And Vulval Candidiasis	1479	1521317	0.10%	830	273975	0.30%
04065400	04070100	Products Used Against Nausea And Vertigo - Antihistamines	Non-Opioid And Compound Analgesics	1879	1521317	0.12%	821	273975	0.30%
03010101	03040102	Selective Beta 2 Agonists	Sedating Antihistamines	1226	1521317	0.08%	819	273975	0.30%
04070100	13020102	Non-Opioid And Compound Analgesics	Emollient Skin Preparations	1572	1521317	0.10%	814	273975	0.30%
01040200	04030300	Antimotility Products	Selective Serotonin Re-Uptake Inhibitors (SSRI)	1010	1521317	0.07%	808	273975	0.29%
04065500	04070100	Products Used Against Nausea And Vertigo - Domperidone & Metoclopramide	Non-Opioid And Compound Analgesics	1731	1521317	0.11%	807	273975	0.29%
04030100	05010103	Tricyclic And Related Antidepressants	Broad-Spectrum Penicillins	1155	1521317	0.08%	806	273975	0.29%
06020100	13040000	Thyroid Hormones	Topical Corticosteroids	1119	1521317	0.07%	799	273975	0.29%
05010103	05010800	Broad-Spectrum Penicillins	Sulphonamides And Trimethoprim	2403	1521317	0.16%	796	273975	0.29%
06020100	07020250	Thyroid Hormones	Preparations For Vaginal And Vulval Candidiasis	1189	1521317	0.08%	795	273975	0.29%
01060400	04060000	Osmotic Laxatives	Products Used Against Nausea And Vertigo	1914	1521317	0.13%	790	273975	0.29%
01050200	03020000	Corticosteroids In Chronic Bowel Problems	Corticosteroids (For Respiratory Conditions)	1500	1521317	0.10%	790	273975	0.29%
04070100	05010800	Non-Opioid And Compound Analgesics	Sulphonamides And Trimethoprim	1832	1521317	0.12%	788	273975	0.29%
02090000	04070100	Antiplatelet Products	Non-Opioid And Compound Analgesics	1313	1521317	0.09%	788	273975	0.29%
01030500	06020100	Proton Pump Inhibitors	Thyroid Hormones	982	1521317	0.06%	788	273975	0.29%
03020000	07020250	Corticosteroids (For Respiratory Conditions)	Preparations For Vaginal And Vulval Candidiasis	1344	1521317	0.09%	775	273975	0.28%
01020200	04030300	Other Antispasmodics	Selective Serotonin Re-Uptake Inhibitors (SSRI)	982	1521317	0.06%	770	273975	0.28%
05010102	13040000	Penicillinase-Resistant Penicillins	Topical Corticosteroids	2016	1521317	0.13%	768	273975	0.28%
01060400	13040000	Osmotic Laxatives	Topical Corticosteroids	1680	1521317	0.11%	767	273975	0.28%
05010103	05011300	Broad-Spectrum Penicillins	Urinary-Tract Infections	2270	1521317	0.15%	764	273975	0.28%
04065400	05010103	Products Used Against Nausea And Vertigo - Antihistamines	Broad-Spectrum Penicillins	2140	1521317	0.14%	760	273975	0.28%
01060400	09010101	Osmotic Laxatives	Oral Iron	2292	1521317	0.15%	756	273975	0.28%
03040102	04030300	Sedating Antihistamines	Selective Serotonin Re-Uptake Inhibitors (SSRI)	1021	1521317	0.07%	756	273975	0.28%
06040103	07020250	Progestogen Products Doubling (In House Use)	Preparations For Vaginal And Vulval Candidiasis	2950	1521317	0.19%	750	273975	0.27%
04070100	05011300	Non-Opioid And Compound Analgesics	Urinary-Tract Infections	1547	1521317	0.10%	748	273975	0.27%
04070100	05010102	Non-Opioid And Compound Analgesics	Penicillinase-Resistant Penicillins	1780	1521317	0.12%	742	273975	0.27%
03010101	04020101	Selective Beta 2 Agonists	First-Generation Antipsychotic Drugs	1201	1521317	0.08%	741	273975	0.27%
01030500	04010100	Proton Pump Inhibitors	Hypnotics	964	1521317	0.06%	738	273975	0.27%
01030500	13040000	Proton Pump Inhibitors	Topical Corticosteroids	1192	1521317	0.08%	737	273975	0.27%
04030300	05010300	Selective Serotonin Re-Uptake Inhibitors (SSRI)	Tetracyclines	1013	1521317	0.07%	736	273975	0.27%
06040103	10010100	Progestogen Products Doubling (In House Use)	Non-Steroidal Anti-Inflammatory Drugs	2585	1521317	0.17%	735	273975	0.27%
05010103	13020102	Broad-Spectrum Penicillins	Emollient Skin Preparations	1630	1521317	0.11%	733	273975	0.27%
04030300	05010101	Selective Serotonin Re-Uptake Inhibitors (SSRI)	Benzylpenicillin And Phenoxymethylpenicillin	1161	1521317	0.08%	732	273975	0.27%
01050200	04070100	Corticosteroids In Chronic Bowel Problems	Non-Opioid And Compound Analgesics	1034	1521317	0.07%	732	273975	0.27%
03040102	13040000	Sedating Antihistamines	Topical Corticosteroids	1726	1521317	0.11%	727	273975	0.27%
04070100	04070401	Non-Opioid And Compound Analgesics	Acute Migraine	1212	1521317	0.08%	725	273975	0.26%
01020200	04070100	Other Antispasmodics	Non-Opioid And Compound Analgesics	1223	1521317	0.08%	719	273975	0.26%
05010103	05011100	Broad-Spectrum Penicillins	Metronidazole And Tinidazole	2507	1521317	0.16%	717	273975	0.26%
01010201	06020100	Compound Alginate Preparations	Thyroid Hormones	1027	1521317	0.07%	716	273975	0.26%
05010102	05010103	Penicillinase-Resistant Penicillins	Broad-Spectrum Penicillins	1884	1521317	0.12%	714	273975	0.26%
01010201	12020101	Compound Alginate Preparations	Corticosteroids Used In Nasal Allergy	1298	1521317	0.09%	713	273975	0.26%
04030100	10010100	Tricyclic And Related Antidepressants	Non-Steroidal Anti-Inflammatory Drugs	1133	1521317	0.07%	713	273975	0.26%
04020101	04065400	First-Generation Antipsychotic Drugs	Products Used Against Nausea And Vertigo - Antihistamines	2227	1521317	0.15%	712	273975	0.26%
01010201	03020000	Compound Alginate Preparations	Corticosteroids (For Respiratory Conditions)	1132	1521317	0.07%	711	273975	0.26%
07020250	12020101	Preparations For Vaginal And Vulval Candidiasis	Corticosteroids Used In Nasal Allergy	1410	1521317	0.09%	705	273975	0.26%
09010101	13040000	Oral Iron	Topical Corticosteroids	1866	1521317	0.12%	703	273975	0.26%
06010102	06010202	Intermediate- And Long-Acting Insulins	Biguanides (Metformin)	949	1521317	0.06%	703	273975	0.26%
01030500	02040000	Proton Pump Inhibitors	Beta-Adrenoceptor Blockers	913	1521317	0.06%	702	273975	0.26%
01030500	04010201	Proton Pump Inhibitors	Benzodiazepines	861	1521317	0.06%	700	273975	0.26%
01010201	01030100	Compound Alginate Preparations	H2-Receptor Antagonists	1698	1521317	0.11%	697	273975	0.25%
01030500	12020101	Proton Pump Inhibitors	Corticosteroids Used In Nasal Allergy	958	1521317	0.06%	697	273975	0.25%
04010201	04030100	Benzodiazepines	Tricyclic And Related Antidepressants	838	1521317	0.06%	693	273975	0.25%
01010201	05010201	Compound Alginate Preparations	Cephalosporins	1860	1521317	0.12%	688	273975	0.25%
04060000	07020250	Products Used Against Nausea And Vertigo	Preparations For Vaginal And Vulval Candidiasis	1807	1521317	0.12%	684	273975	0.25%
04030300	05011100	Selective Serotonin Re-Uptake Inhibitors (SSRI)	Metronidazole And Tinidazole	1067	1521317	0.07%	684	273975	0.25%
02040000	05010103	Beta-Adrenoceptor Blockers	Broad-Spectrum Penicillins	1051	1521317	0.07%	684	273975	0.25%
03010101	13020100	Selective Beta 2 Agonists	Emollients	956	1521317	0.06%	681	273975	0.25%
01030500	04065500	Proton Pump Inhibitors	Products Used Against Nausea And Vertigo - Domperidone & Metoclopramide	1351	1521317	0.09%	679	273975	0.25%
05020100	07020250	Triazole Antifungals	Preparations For Vaginal And Vulval Candidiasis	1904	1521317	0.13%	670	273975	0.24%
04010100	04020102	Hypnotics	Second-Generation Antipsychotic Drugs	714	1521317	0.05%	668	273975	0.24%
03010101	04065400	Selective Beta 2 Agonists	Products Used Against Nausea And Vertigo - Antihistamines	1089	1521317	0.07%	667	273975	0.24%
03040101	06020100	Non-Sedating Antihistamines	Thyroid Hormones	842	1521317	0.06%	666	273975	0.24%
01050200	04030300	Corticosteroids In Chronic Bowel Problems	Selective Serotonin Re-Uptake Inhibitors (SSRI)	759	1521317	0.05%	663	273975	0.24%
03040101	06040103	Non-Sedating Antihistamines	Progestogen Products Doubling (In House Use)	1811	1521317	0.12%	661	273975	0.24%
04070100	05010101	Non-Opioid And Compound Analgesics	Benzylpenicillin And Phenoxymethylpenicillin	2033	1521317	0.13%	657	273975	0.24%
05011300	07020250	Urinary-Tract Infections	Preparations For Vaginal And Vulval Candidiasis	1832	1521317	0.12%	655	273975	0.24%
01060100	01060400	Bulk-Forming Laxatives	Osmotic Laxatives	1759	1521317	0.12%	652	273975	0.24%
04030300	04070401	Selective Serotonin Re-Uptake Inhibitors (SSRI)	Acute Migraine	754	1521317	0.05%	650	273975	0.24%
03040101	07020250	Non-Sedating Antihistamines	Preparations For Vaginal And Vulval Candidiasis	1282	1521317	0.08%	649	273975	0.24%
04030400	06040103	Other Antidepressants	Progestogen Products Doubling (In House Use)	850	1521317	0.06%	649	273975	0.24%
04010100	04030100	Hypnotics	Tricyclic And Related Antidepressants	823	1521317	0.05%	649	273975	0.24%
06010101	06010202	Short-Acting Insulins	Biguanides (Metformin)	861	1521317	0.06%	648	273975	0.24%
01030500	06040103	Proton Pump Inhibitors	Progestogen Products Doubling (In House Use)	1366	1521317	0.09%	646	273975	0.24%
01030100	04030300	H2-Receptor Antagonists	Selective Serotonin Re-Uptake Inhibitors (SSRI)	834	1521317	0.05%	646	273975	0.24%
13020103	13040000	Antimicrobial Emollients	Topical Corticosteroids	1545	1521317	0.10%	644	273975	0.24%
04060000	04065600	Products Used Against Nausea And Vertigo	Products Used Against Nausea And Vertigo - 5 HT3 Antagonists	1902	1521317	0.13%	639	273975	0.23%
02040000	04030400	Beta-Adrenoceptor Blockers	Other Antidepressants	743	1521317	0.05%	636	273975	0.23%
04010201	10010100	Benzodiazepines	Non-Steroidal Anti-Inflammatory Drugs	1144	1521317	0.08%	633	273975	0.23%
04065500	05010103	Products Used Against Nausea And Vertigo - Domperidone & Metoclopramide	Broad-Spectrum Penicillins	1589	1521317	0.10%	630	273975	0.23%
05010800	07020250	Sulphonamides And Trimethoprim	Preparations For Vaginal And Vulval Candidiasis	1766	1521317	0.12%	627	273975	0.23%
04020101	04065500	First-Generation Antipsychotic Drugs	Products Used Against Nausea And Vertigo - Domperidone & Metoclopramide	1875	1521317	0.12%	626	273975	0.23%
10010100	13040000	Non-Steroidal Anti-Inflammatory Drugs	Topical Corticosteroids	1413	1521317	0.09%	626	273975	0.23%
01010201	03040101	Compound Alginate Preparations	Non-Sedating Antihistamines	1094	1521317	0.07%	626	273975	0.23%
01060400	04070200	Osmotic Laxatives	Opioid Analgesics	926	1521317	0.06%	625	273975	0.23%
01030100	04070100	H2-Receptor Antagonists	Non-Opioid And Compound Analgesics	1172	1521317	0.08%	624	273975	0.23%
04010201	04020102	Benzodiazepines	Second-Generation Antipsychotic Drugs	653	1521317	0.04%	623	273975	0.23%
04070100	04105100	Non-Opioid And Compound Analgesics	Substance Dependence - Nicotine Dependence	1323	1521317	0.09%	620	273975	0.23%
01030100	01030500	H2-Receptor Antagonists	Proton Pump Inhibitors	1200	1521317	0.08%	618	273975	0.23%
01010201	04020101	Compound Alginate Preparations	First-Generation Antipsychotic Drugs	1750	1521317	0.12%	610	273975	0.22%
06040101	06040102	Oestrogens And HRT	Progestogens And Progesterone Receptor Modulators	1779	1521317	0.12%	603	273975	0.22%
07020250	10010100	Preparations For Vaginal And Vulval Candidiasis	Non-Steroidal Anti-Inflammatory Drugs	1597	1521317	0.10%	603	273975	0.22%
05010500	07020250	Macrolides	Preparations For Vaginal And Vulval Candidiasis	1542	1521317	0.10%	601	273975	0.22%
03010101	05011300	Selective Beta 2 Agonists	Urinary-Tract Infections	959	1521317	0.06%	598	273975	0.22%
03020000	06040103	Corticosteroids (For Respiratory Conditions)	Progestogen Products Doubling (In House Use)	1275	1521317	0.08%	595	273975	0.22%
03040102	04070100	Sedating Antihistamines	Non-Opioid And Compound Analgesics	1086	1521317	0.07%	594	273975	0.22%
01060400	10010100	Osmotic Laxatives	Non-Steroidal Anti-Inflammatory Drugs	1288	1521317	0.08%	593	273975	0.22%
03010101	05010102	Selective Beta 2 Agonists	Penicillinase-Resistant Penicillins	953	1521317	0.06%	592	273975	0.22%
03010101	04105100	Selective Beta 2 Agonists	Substance Dependence - Nicotine Dependence	1016	1521317	0.07%	588	273975	0.21%
05011100	07020250	Metronidazole And Tinidazole	Preparations For Vaginal And Vulval Candidiasis	1937	1521317	0.13%	586	273975	0.21%
02090000	05010103	Antiplatelet Products	Broad-Spectrum Penicillins	1273	1521317	0.08%	586	273975	0.21%
03020000	13020102	Corticosteroids (For Respiratory Conditions)	Emollient Skin Preparations	850	1521317	0.06%	586	273975	0.21%
04060000	04070200	Products Used Against Nausea And Vertigo	Opioid Analgesics	834	1521317	0.05%	586	273975	0.21%
01060400	06020100	Osmotic Laxatives	Thyroid Hormones	852	1521317	0.06%	582	273975	0.21%
06020100	12020101	Thyroid Hormones	Corticosteroids Used In Nasal Allergy	703	1521317	0.05%	582	273975	0.21%
04065400	04065500	Products Used Against Nausea And Vertigo - Antihistamines	Products Used Against Nausea And Vertigo - Domperidone & Metoclopramide	1858	1521317	0.12%	581	273975	0.21%
04010100	04060000	Hypnotics	Products Used Against Nausea And Vertigo	1263	1521317	0.08%	578	273975	0.21%
02090000	03010101	Antiplatelet Products	Selective Beta 2 Agonists	837	1521317	0.06%	578	273975	0.21%
05010201	13040000	Cephalosporins	Topical Corticosteroids	1475	1521317	0.10%	577	273975	0.21%
01030500	03020000	Proton Pump Inhibitors	Corticosteroids (For Respiratory Conditions)	759	1521317	0.05%	576	273975	0.21%
04070100	05011100	Non-Opioid And Compound Analgesics	Metronidazole And Tinidazole	1393	1521317	0.09%	575	273975	0.21%
01060400	01070200	Osmotic Laxatives	Compound Haemorrhoid Products With Corticosteroids	1952	1521317	0.13%	573	273975	0.21%
05010101	05010103	Benzylpenicillin And Phenoxymethylpenicillin	Broad-Spectrum Penicillins	1700	1521317	0.11%	569	273975	0.21%
03010101	04065500	Selective Beta 2 Agonists	Products Used Against Nausea And Vertigo - Domperidone & Metoclopramide	901	1521317	0.06%	569	273975	0.21%
04010100	10010100	Hypnotics	Non-Steroidal Anti-Inflammatory Drugs	856	1521317	0.06%	569	273975	0.21%
04030100	04030400	Tricyclic And Related Antidepressants	Other Antidepressants	660	1521317	0.04%	567	273975	0.21%
04020102	04070100	Second-Generation Antipsychotic Drugs	Non-Opioid And Compound Analgesics	598	1521317	0.04%	565	273975	0.21%
06010101	06020100	Short-Acting Insulins	Thyroid Hormones	587	1521317	0.04%	565	273975	0.21%
04070100	10030250	Non-Opioid And Compound Analgesics	Topical Nsaids And Counter Irritants	1236	1521317	0.08%	564	273975	0.21%
04070100	04070300	Non-Opioid And Compound Analgesics	Neuropathic Pain	763	1521317	0.05%	562	273975	0.21%
04030300	06010202	Selective Serotonin Re-Uptake Inhibitors (SSRI)	Biguanides (Metformin)	597	1521317	0.04%	559	273975	0.20%
07020250	13020102	Preparations For Vaginal And Vulval Candidiasis	Emollient Skin Preparations	1438	1521317	0.09%	558	273975	0.20%
04060000	13040000	Products Used Against Nausea And Vertigo	Topical Corticosteroids	1236	1521317	0.08%	558	273975	0.20%
04030100	07020250	Tricyclic And Related Antidepressants	Preparations For Vaginal And Vulval Candidiasis	810	1521317	0.05%	556	273975	0.20%
01010201	10010100	Compound Alginate Preparations	Non-Steroidal Anti-Inflammatory Drugs	1198	1521317	0.08%	554	273975	0.20%
02090000	06020100	Antiplatelet Products	Thyroid Hormones	766	1521317	0.05%	550	273975	0.20%
01060400	05010201	Osmotic Laxatives	Cephalosporins	1465	1521317	0.10%	549	273975	0.20%
03040101	03040102	Non-Sedating Antihistamines	Sedating Antihistamines	1145	1521317	0.08%	548	273975	0.20%
04030400	04060000	Other Antidepressants	Products Used Against Nausea And Vertigo	662	1521317	0.04%	547	273975	0.20%
03010101	05010800	Selective Beta 2 Agonists	Sulphonamides And Trimethoprim	926	1521317	0.06%	543	273975	0.20%
04030400	07020250	Other Antidepressants	Preparations For Vaginal And Vulval Candidiasis	656	1521317	0.04%	543	273975	0.20%
04030400	10010100	Other Antidepressants	Non-Steroidal Anti-Inflammatory Drugs	634	1521317	0.04%	543	273975	0.20%
04060000	05010201	Products Used Against Nausea And Vertigo	Cephalosporins	1621	1521317	0.11%	542	273975	0.20%
04105100	05010103	Substance Dependence - Nicotine Dependence	Broad-Spectrum Penicillins	1451	1521317	0.10%	540	273975	0.20%
04010100	04020101	Hypnotics	First-Generation Antipsychotic Drugs	991	1521317	0.07%	536	273975	0.20%
04010100	07020250	Hypnotics	Preparations For Vaginal And Vulval Candidiasis	961	1521317	0.06%	534	273975	0.19%
01020200	01030500	Other Antispasmodics	Proton Pump Inhibitors	875	1521317	0.06%	534	273975	0.19%
04020101	04030400	First-Generation Antipsychotic Drugs	Other Antidepressants	610	1521317	0.04%	533	273975	0.19%
01010201	04065400	Compound Alginate Preparations	Products Used Against Nausea And Vertigo - Antihistamines	1614	1521317	0.11%	530	273975	0.19%
01040200	03010101	Antimotility Products	Selective Beta 2 Agonists	697	1521317	0.05%	530	273975	0.19%
02040000	02090000	Beta-Adrenoceptor Blockers	Antiplatelet Products	807	1521317	0.05%	529	273975	0.19%
04060000	05011300	Products Used Against Nausea And Vertigo	Urinary-Tract Infections	1330	1521317	0.09%	528	273975	0.19%
01030500	04020101	Proton Pump Inhibitors	First-Generation Antipsychotic Drugs	1013	1521317	0.07%	527	273975	0.19%
01030500	02090000	Proton Pump Inhibitors	Antiplatelet Products	741	1521317	0.05%	527	273975	0.19%
01010201	04070200	Compound Alginate Preparations	Opioid Analgesics	756	1521317	0.05%	526	273975	0.19%
01030500	01050200	Proton Pump Inhibitors	Corticosteroids In Chronic Bowel Problems	709	1521317	0.05%	523	273975	0.19%
01060200	04070100	Stimulant Laxatives	Non-Opioid And Compound Analgesics	920	1521317	0.06%	521	273975	0.19%
01050200	03040101	Corticosteroids In Chronic Bowel Problems	Non-Sedating Antihistamines	830	1521317	0.05%	521	273975	0.19%
04030100	06040103	Tricyclic And Related Antidepressants	Progestogen Products Doubling (In House Use)	879	1521317	0.06%	520	273975	0.19%
01060400	04030100	Osmotic Laxatives	Tricyclic And Related Antidepressants	731	1521317	0.05%	520	273975	0.19%
05010500	13040000	Macrolides	Topical Corticosteroids	1152	1521317	0.08%	519	273975	0.19%
06010102	06020100	Intermediate- And Long-Acting Insulins	Thyroid Hormones	539	1521317	0.04%	519	273975	0.19%
04070200	07020250	Opioid Analgesics	Preparations For Vaginal And Vulval Candidiasis	786	1521317	0.05%	518	273975	0.19%
03020000	05010500	Corticosteroids (For Respiratory Conditions)	Macrolides	865	1521317	0.06%	514	273975	0.19%
04070100	06010202	Non-Opioid And Compound Analgesics	Biguanides (Metformin)	646	1521317	0.04%	514	273975	0.19%
01010201	04065500	Compound Alginate Preparations	Products Used Against Nausea And Vertigo - Domperidone & Metoclopramide	1424	1521317	0.09%	513	273975	0.19%
04070100	05010300	Non-Opioid And Compound Analgesics	Tetracyclines	1026	1521317	0.07%	512	273975	0.19%
06020100	06040103	Thyroid Hormones	Progestogen Products Doubling (In House Use)	840	1521317	0.06%	512	273975	0.19%
03040101	13020101	Non-Sedating Antihistamines	Emollient Bath Additives And Shower Preparations	840	1521317	0.06%	512	273975	0.19%
04010100	13040000	Hypnotics	Topical Corticosteroids	786	1521317	0.05%	512	273975	0.19%
04030300	11040200	Selective Serotonin Re-Uptake Inhibitors (SSRI)	Other Anti-Inflammatory Eye Preparations (For The Eye)	635	1521317	0.04%	512	273975	0.19%
13020100	13020101	Emollients	Emollient Bath Additives And Shower Preparations	1141	1521317	0.08%	511	273975	0.19%
04030300	04080100	Selective Serotonin Re-Uptake Inhibitors (SSRI)	Control Of Epilepsy	543	1521317	0.04%	509	273975	0.19%
13040000	13090000	Topical Corticosteroids	Shampoos And Other Preparations For Scalp And Hair Conditions	1054	1521317	0.07%	507	273975	0.19%
04070100	13020100	Non-Opioid And Compound Analgesics	Emollients	1080	1521317	0.07%	506	273975	0.18%
01060400	12020101	Osmotic Laxatives	Corticosteroids Used In Nasal Allergy	857	1521317	0.06%	506	273975	0.18%
02040000	04010201	Beta-Adrenoceptor Blockers	Benzodiazepines	656	1521317	0.04%	505	273975	0.18%
06010202	06020100	Biguanides (Metformin)	Thyroid Hormones	577	1521317	0.04%	505	273975	0.18%
04020101	07020250	First-Generation Antipsychotic Drugs	Preparations For Vaginal And Vulval Candidiasis	1270	1521317	0.08%	503	273975	0.18%
01010201	04030100	Compound Alginate Preparations	Tricyclic And Related Antidepressants	717	1521317	0.05%	502	273975	0.18%
01020200	03010101	Other Antispasmodics	Selective Beta 2 Agonists	658	1521317	0.04%	499	273975	0.18%
05010102	07020250	Penicillinase-Resistant Penicillins	Preparations For Vaginal And Vulval Candidiasis	1493	1521317	0.10%	496	273975	0.18%
01010201	04010100	Compound Alginate Preparations	Hypnotics	903	1521317	0.06%	496	273975	0.18%
04030400	13040000	Other Antidepressants	Topical Corticosteroids	578	1521317	0.04%	496	273975	0.18%
03020000	06020100	Corticosteroids (For Respiratory Conditions)	Thyroid Hormones	537	1521317	0.04%	495	273975	0.18%
03020000	09010101	Corticosteroids (For Respiratory Conditions)	Oral Iron	838	1521317	0.06%	494	273975	0.18%
13020100	13020102	Emollients	Emollient Skin Preparations	1098	1521317	0.07%	492	273975	0.18%
04030300	09060400	Selective Serotonin Re-Uptake Inhibitors (SSRI)	Vitamin D	621	1521317	0.04%	491	273975	0.18%
04070200	06040103	Opioid Analgesics	Progestogen Products Doubling (In House Use)	870	1521317	0.06%	489	273975	0.18%
01060400	03040101	Osmotic Laxatives	Non-Sedating Antihistamines	837	1521317	0.06%	489	273975	0.18%
04070200	13040000	Opioid Analgesics	Topical Corticosteroids	680	1521317	0.04%	489	273975	0.18%
05010201	09010101	Cephalosporins	Oral Iron	1643	1521317	0.11%	488	273975	0.18%
04030300	13020101	Selective Serotonin Re-Uptake Inhibitors (SSRI)	Emollient Bath Additives And Shower Preparations	609	1521317	0.04%	488	273975	0.18%
03040101	10010100	Non-Sedating Antihistamines	Non-Steroidal Anti-Inflammatory Drugs	917	1521317	0.06%	487	273975	0.18%
03010101	05010300	Selective Beta 2 Agonists	Tetracyclines	801	1521317	0.05%	487	273975	0.18%
04030300	13020100	Selective Serotonin Re-Uptake Inhibitors (SSRI)	Emollients	649	1521317	0.04%	487	273975	0.18%
05010201	05010800	Cephalosporins	Sulphonamides And Trimethoprim	1652	1521317	0.11%	486	273975	0.18%
01030500	05010201	Proton Pump Inhibitors	Cephalosporins	888	1521317	0.06%	486	273975	0.18%
01060400	04010100	Osmotic Laxatives	Hypnotics	767	1521317	0.05%	484	273975	0.18%
03010000	05010103	Bronchodilators	Broad-Spectrum Penicillins	931	1521317	0.06%	482	273975	0.18%
04010100	06040103	Hypnotics	Progestogen Products Doubling (In House Use)	944	1521317	0.06%	481	273975	0.18%
01060100	04070100	Bulk-Forming Laxatives	Non-Opioid And Compound Analgesics	946	1521317	0.06%	480	273975	0.18%
03010101	04020102	Selective Beta 2 Agonists	Second-Generation Antipsychotic Drugs	486	1521317	0.03%	479	273975	0.17%
03040101	09010101	Non-Sedating Antihistamines	Oral Iron	928	1521317	0.06%	478	273975	0.17%
01010201	13020102	Compound Alginate Preparations	Emollient Skin Preparations	1110	1521317	0.07%	477	273975	0.17%
01010201	04030400	Compound Alginate Preparations	Other Antidepressants	552	1521317	0.04%	477	273975	0.17%
03010101	05010101	Selective Beta 2 Agonists	Benzylpenicillin And Phenoxymethylpenicillin	945	1521317	0.06%	476	273975	0.17%
01060200	04030300	Stimulant Laxatives	Selective Serotonin Re-Uptake Inhibitors (SSRI)	583	1521317	0.04%	476	273975	0.17%
04030300	06010102	Selective Serotonin Re-Uptake Inhibitors (SSRI)	Intermediate- And Long-Acting Insulins	495	1521317	0.03%	476	273975	0.17%
04010201	07020250	Benzodiazepines	Preparations For Vaginal And Vulval Candidiasis	646	1521317	0.04%	472	273975	0.17%
04010201	06040103	Benzodiazepines	Progestogen Products Doubling (In House Use)	753	1521317	0.05%	471	273975	0.17%
01050200	13040000	Corticosteroids In Chronic Bowel Problems	Topical Corticosteroids	726	1521317	0.05%	471	273975	0.17%
02040000	04030100	Beta-Adrenoceptor Blockers	Tricyclic And Related Antidepressants	613	1521317	0.04%	471	273975	0.17%
04060000	09010101	Products Used Against Nausea And Vertigo	Oral Iron	1387	1521317	0.09%	470	273975	0.17%
01050200	05010500	Corticosteroids In Chronic Bowel Problems	Macrolides	822	1521317	0.05%	470	273975	0.17%
01060400	03020000	Osmotic Laxatives	Corticosteroids (For Respiratory Conditions)	697	1521317	0.05%	470	273975	0.17%
09010101	10010100	Oral Iron	Non-Steroidal Anti-Inflammatory Drugs	1361	1521317	0.09%	469	273975	0.17%
03040101	04070200	Non-Sedating Antihistamines	Opioid Analgesics	591	1521317	0.04%	468	273975	0.17%
01040200	05010103	Antimotility Products	Broad-Spectrum Penicillins	1020	1521317	0.07%	466	273975	0.17%
04060000	06020100	Products Used Against Nausea And Vertigo	Thyroid Hormones	685	1521317	0.05%	465	273975	0.17%
04065400	07020250	Products Used Against Nausea And Vertigo - Antihistamines	Preparations For Vaginal And Vulval Candidiasis	1172	1521317	0.08%	461	273975	0.17%
06040103	12020101	Progestogen Products Doubling (In House Use)	Corticosteroids Used In Nasal Allergy	1051	1521317	0.07%	460	273975	0.17%
01060400	04010201	Osmotic Laxatives	Benzodiazepines	591	1521317	0.04%	460	273975	0.17%
02040000	04010100	Beta-Adrenoceptor Blockers	Hypnotics	619	1521317	0.04%	459	273975	0.17%
01030500	05010500	Proton Pump Inhibitors	Macrolides	900	1521317	0.06%	458	273975	0.17%
01060400	04030400	Osmotic Laxatives	Other Antidepressants	528	1521317	0.03%	457	273975	0.17%
11040200	13040000	Other Anti-Inflammatory Eye Preparations (For The Eye)	Topical Corticosteroids	861	1521317	0.06%	456	273975	0.17%
04070100	09060400	Non-Opioid And Compound Analgesics	Vitamin D	858	1521317	0.06%	454	273975	0.17%
12020101	13020102	Corticosteroids Used In Nasal Allergy	Emollient Skin Preparations	707	1521317	0.05%	454	273975	0.17%
01030100	03010101	H2-Receptor Antagonists	Selective Beta 2 Agonists	635	1521317	0.04%	454	273975	0.17%
04030300	06010101	Selective Serotonin Re-Uptake Inhibitors (SSRI)	Short-Acting Insulins	467	1521317	0.03%	454	273975	0.17%
13040000	71580200	Topical Corticosteroids	Emollient Ointment	1038	1521317	0.07%	453	273975	0.17%
05010800	06040103	Sulphonamides And Trimethoprim	Progestogen Products Doubling (In House Use)	1853	1521317	0.12%	452	273975	0.16%
06020100	10010100	Thyroid Hormones	Non-Steroidal Anti-Inflammatory Drugs	635	1521317	0.04%	452	273975	0.16%
04030100	13040000	Tricyclic And Related Antidepressants	Topical Corticosteroids	626	1521317	0.04%	452	273975	0.16%
04070100	06010102	Non-Opioid And Compound Analgesics	Intermediate- And Long-Acting Insulins	536	1521317	0.04%	451	273975	0.16%
01060100	04030300	Bulk-Forming Laxatives	Selective Serotonin Re-Uptake Inhibitors (SSRI)	615	1521317	0.04%	450	273975	0.16%
05010800	05011300	Sulphonamides And Trimethoprim	Urinary-Tract Infections	1416	1521317	0.09%	449	273975	0.16%
04030000	04070100	Antidepressants	Non-Opioid And Compound Analgesics	548	1521317	0.04%	448	273975	0.16%
05010101	07020250	Benzylpenicillin And Phenoxymethylpenicillin	Preparations For Vaginal And Vulval Candidiasis	1492	1521317	0.10%	447	273975	0.16%
01060400	04020101	Osmotic Laxatives	First-Generation Antipsychotic Drugs	1126	1521317	0.07%	447	273975	0.16%
03030200	03040101	Leukotriene Receptor Antagonists	Non-Sedating Antihistamines	575	1521317	0.04%	447	273975	0.16%
03010101	06010202	Selective Beta 2 Agonists	Biguanides (Metformin)	489	1521317	0.03%	447	273975	0.16%
03040102	05010103	Sedating Antihistamines	Broad-Spectrum Penicillins	1066	1521317	0.07%	444	273975	0.16%
03020000	05010201	Corticosteroids (For Respiratory Conditions)	Cephalosporins	803	1521317	0.05%	443	273975	0.16%
02040000	06020100	Beta-Adrenoceptor Blockers	Thyroid Hormones	497	1521317	0.03%	443	273975	0.16%
01060400	06040103	Osmotic Laxatives	Progestogen Products Doubling (In House Use)	1479	1521317	0.10%	441	273975	0.16%
05010201	05011300	Cephalosporins	Urinary-Tract Infections	1342	1521317	0.09%	441	273975	0.16%
02040000	06040103	Beta-Adrenoceptor Blockers	Progestogen Products Doubling (In House Use)	914	1521317	0.06%	436	273975	0.16%
09010101	12020101	Oral Iron	Corticosteroids Used In Nasal Allergy	895	1521317	0.06%	432	273975	0.16%
03010101	09060400	Selective Beta 2 Agonists	Vitamin D	566	1521317	0.04%	432	273975	0.16%
02090000	06010101	Antiplatelet Products	Short-Acting Insulins	522	1521317	0.03%	432	273975	0.16%
04070100	06010101	Non-Opioid And Compound Analgesics	Short-Acting Insulins	502	1521317	0.03%	429	273975	0.16%
01030100	04060000	H2-Receptor Antagonists	Products Used Against Nausea And Vertigo	1128	1521317	0.07%	428	273975	0.16%
06040103	09010101	Progestogen Products Doubling (In House Use)	Oral Iron	1881	1521317	0.12%	427	273975	0.16%
05010201	10010100	Cephalosporins	Non-Steroidal Anti-Inflammatory Drugs	1135	1521317	0.07%	427	273975	0.16%
03040101	04060000	Non-Sedating Antihistamines	Products Used Against Nausea And Vertigo	689	1521317	0.05%	427	273975	0.16%
03040101	04030100	Non-Sedating Antihistamines	Tricyclic And Related Antidepressants	527	1521317	0.03%	426	273975	0.16%
02040000	02050501	Beta-Adrenoceptor Blockers	Angiotensin-Converting Enzyme Inhibitors (ACE Inhibitors)	582	1521317	0.04%	425	273975	0.16%
04070200	04070300	Opioid Analgesics	Neuropathic Pain	531	1521317	0.03%	425	273975	0.16%
03040101	04030400	Non-Sedating Antihistamines	Other Antidepressants	472	1521317	0.03%	425	273975	0.16%
03040102	13020102	Sedating Antihistamines	Emollient Skin Preparations	959	1521317	0.06%	423	273975	0.15%
05010103	06010102	Broad-Spectrum Penicillins	Intermediate- And Long-Acting Insulins	526	1521317	0.03%	422	273975	0.15%
04030100	04060000	Tricyclic And Related Antidepressants	Products Used Against Nausea And Vertigo	581	1521317	0.04%	421	273975	0.15%
04020101	13040000	First-Generation Antipsychotic Drugs	Topical Corticosteroids	900	1521317	0.06%	419	273975	0.15%
01010201	02040000	Compound Alginate Preparations	Beta-Adrenoceptor Blockers	632	1521317	0.04%	418	273975	0.15%
04030300	13100101	Selective Serotonin Re-Uptake Inhibitors (SSRI)	Antibacterial Preparations Only Used Topically	583	1521317	0.04%	416	273975	0.15%
04010201	04060000	Benzodiazepines	Products Used Against Nausea And Vertigo	561	1521317	0.04%	415	273975	0.15%
04070100	11040200	Non-Opioid And Compound Analgesics	Other Anti-Inflammatory Eye Preparations (For The Eye)	796	1521317	0.05%	414	273975	0.15%
04030300	06040102	Selective Serotonin Re-Uptake Inhibitors (SSRI)	Progestogens And Progesterone Receptor Modulators	570	1521317	0.04%	413	273975	0.15%
03020000	04030100	Corticosteroids (For Respiratory Conditions)	Tricyclic And Related Antidepressants	483	1521317	0.03%	413	273975	0.15%
05010103	06010101	Broad-Spectrum Penicillins	Short-Acting Insulins	503	1521317	0.03%	412	273975	0.15%
05010103	05010300	Broad-Spectrum Penicillins	Tetracyclines	992	1521317	0.07%	411	273975	0.15%
04030300	11030100	Selective Serotonin Re-Uptake Inhibitors (SSRI)	Antibacterials (In Eye Preparation)	616	1521317	0.04%	411	273975	0.15%
04070100	04080100	Non-Opioid And Compound Analgesics	Control Of Epilepsy	542	1521317	0.04%	411	273975	0.15%
06010102	07020250	Intermediate- And Long-Acting Insulins	Preparations For Vaginal And Vulval Candidiasis	530	1521317	0.03%	411	273975	0.15%
01030500	04065400	Proton Pump Inhibitors	Products Used Against Nausea And Vertigo - Antihistamines	884	1521317	0.06%	410	273975	0.15%
04030300	04070300	Selective Serotonin Re-Uptake Inhibitors (SSRI)	Neuropathic Pain	464	1521317	0.03%	410	273975	0.15%
04030300	05020100	Selective Serotonin Re-Uptake Inhibitors (SSRI)	Triazole Antifungals	582	1521317	0.04%	409	273975	0.15%
04030000	04030300	Antidepressants	Selective Serotonin Re-Uptake Inhibitors (SSRI)	454	1521317	0.03%	409	273975	0.15%
01010201	04010201	Compound Alginate Preparations	Benzodiazepines	543	1521317	0.04%	408	273975	0.15%
01030500	04020102	Proton Pump Inhibitors	Second-Generation Antipsychotic Drugs	420	1521317	0.03%	408	273975	0.15%
04010201	04020101	Benzodiazepines	First-Generation Antipsychotic Drugs	520	1521317	0.03%	407	273975	0.15%
01010201	02090000	Compound Alginate Preparations	Antiplatelet Products	808	1521317	0.05%	406	273975	0.15%
03020000	04060000	Corticosteroids (For Respiratory Conditions)	Products Used Against Nausea And Vertigo	634	1521317	0.04%	406	273975	0.15%
01010201	05010500	Compound Alginate Preparations	Macrolides	876	1521317	0.06%	405	273975	0.15%
01050200	12020101	Corticosteroids In Chronic Bowel Problems	Corticosteroids Used In Nasal Allergy	534	1521317	0.04%	404	273975	0.15%
02090000	06010102	Antiplatelet Products	Intermediate- And Long-Acting Insulins	504	1521317	0.03%	404	273975	0.15%
04060000	12020101	Products Used Against Nausea And Vertigo	Corticosteroids Used In Nasal Allergy	727	1521317	0.05%	403	273975	0.15%
01020200	05010103	Other Antispasmodics	Broad-Spectrum Penicillins	819	1521317	0.05%	400	273975	0.15%
06020100	09060400	Thyroid Hormones	Vitamin D	608	1521317	0.04%	400	273975	0.15%
01030100	05010103	H2-Receptor Antagonists	Broad-Spectrum Penicillins	825	1521317	0.05%	398	273975	0.15%
01030500	01040200	Proton Pump Inhibitors	Antimotility Products	592	1521317	0.04%	397	273975	0.14%
04010201	13040000	Benzodiazepines	Topical Corticosteroids	528	1521317	0.03%	396	273975	0.14%
01060400	04065400	Osmotic Laxatives	Products Used Against Nausea And Vertigo - Antihistamines	1030	1521317	0.07%	395	273975	0.14%
02080100	02090000	Parenteral Anticoagulants	Antiplatelet Products	905	1521317	0.06%	395	273975	0.14%
04030100	06020100	Tricyclic And Related Antidepressants	Thyroid Hormones	435	1521317	0.03%	395	273975	0.14%
03040101	13020100	Non-Sedating Antihistamines	Emollients	759	1521317	0.05%	394	273975	0.14%
01030500	13020102	Proton Pump Inhibitors	Emollient Skin Preparations	597	1521317	0.04%	392	273975	0.14%
06020100	13020102	Thyroid Hormones	Emollient Skin Preparations	552	1521317	0.04%	391	273975	0.14%
05010201	06040103	Cephalosporins	Progestogen Products Doubling (In House Use)	1531	1521317	0.10%	390	273975	0.14%
05010103	11030100	Broad-Spectrum Penicillins	Antibacterials (In Eye Preparation)	1297	1521317	0.09%	389	273975	0.14%
05010201	05010500	Cephalosporins	Macrolides	976	1521317	0.06%	389	273975	0.14%
01060400	13020102	Osmotic Laxatives	Emollient Skin Preparations	836	1521317	0.05%	389	273975	0.14%
02040000	07020250	Beta-Adrenoceptor Blockers	Preparations For Vaginal And Vulval Candidiasis	634	1521317	0.04%	388	273975	0.14%
03020000	11040200	Corticosteroids (For Respiratory Conditions)	Other Anti-Inflammatory Eye Preparations (For The Eye)	595	1521317	0.04%	388	273975	0.14%
05010103	06010202	Broad-Spectrum Penicillins	Biguanides (Metformin)	545	1521317	0.04%	387	273975	0.14%
03020000	04030400	Corticosteroids (For Respiratory Conditions)	Other Antidepressants	408	1521317	0.03%	387	273975	0.14%
03040102	12020101	Sedating Antihistamines	Corticosteroids Used In Nasal Allergy	813	1521317	0.05%	386	273975	0.14%
04030300	09060700	Selective Serotonin Re-Uptake Inhibitors (SSRI)	Multivitamin And Multimineral Preparations	502	1521317	0.03%	386	273975	0.14%
06010101	07020250	Short-Acting Insulins	Preparations For Vaginal And Vulval Candidiasis	487	1521317	0.03%	386	273975	0.14%
05010201	06020100	Cephalosporins	Thyroid Hormones	597	1521317	0.04%	384	273975	0.14%
01070200	04030300	Compound Haemorrhoid Products With Corticosteroids	Selective Serotonin Re-Uptake Inhibitors (SSRI)	544	1521317	0.04%	384	273975	0.14%
03010000	04030300	Bronchodilators	Selective Serotonin Re-Uptake Inhibitors (SSRI)	454	1521317	0.03%	384	273975	0.14%
05010500	06040103	Macrolides	Progestogen Products Doubling (In House Use)	1421	1521317	0.09%	383	273975	0.14%
02090000	06010202	Antiplatelet Products	Biguanides (Metformin)	545	1521317	0.04%	383	273975	0.14%
06040103	13020102	Progestogen Products Doubling (In House Use)	Emollient Skin Preparations	1074	1521317	0.07%	382	273975	0.14%
02040000	04070200	Beta-Adrenoceptor Blockers	Opioid Analgesics	477	1521317	0.03%	382	273975	0.14%
03020000	04070200	Corticosteroids (For Respiratory Conditions)	Opioid Analgesics	469	1521317	0.03%	381	273975	0.14%
02040000	04060000	Beta-Adrenoceptor Blockers	Products Used Against Nausea And Vertigo	588	1521317	0.04%	380	273975	0.14%
02040000	02060200	Beta-Adrenoceptor Blockers	Calcium-Channel Blockers	657	1521317	0.04%	379	273975	0.14%
02040000	10010100	Beta-Adrenoceptor Blockers	Non-Steroidal Anti-Inflammatory Drugs	586	1521317	0.04%	379	273975	0.14%
01040200	04070200	Antimotility Products	Opioid Analgesics	545	1521317	0.04%	379	273975	0.14%
09010101	09060400	Oral Iron	Vitamin D	1092	1521317	0.07%	378	273975	0.14%
04065500	07020250	Products Used Against Nausea And Vertigo - Domperidone & Metoclopramide	Preparations For Vaginal And Vulval Candidiasis	924	1521317	0.06%	378	273975	0.14%
04010100	04065500	Hypnotics	Products Used Against Nausea And Vertigo - Domperidone & Metoclopramide	788	1521317	0.05%	378	273975	0.14%
01020200	01060400	Other Antispasmodics	Osmotic Laxatives	751	1521317	0.05%	378	273975	0.14%
05010103	12010151	Broad-Spectrum Penicillins	Anti-Inflammatory Preparations	1074	1521317	0.07%	377	273975	0.14%
01010201	01060100	Compound Alginate Preparations	Bulk-Forming Laxatives	915	1521317	0.06%	376	273975	0.14%
05010500	12020101	Macrolides	Corticosteroids Used In Nasal Allergy	703	1521317	0.05%	376	273975	0.14%
01030500	05011300	Proton Pump Inhibitors	Urinary-Tract Infections	660	1521317	0.04%	376	273975	0.14%
01060400	04065500	Osmotic Laxatives	Products Used Against Nausea And Vertigo - Domperidone & Metoclopramide	894	1521317	0.06%	375	273975	0.14%
05010201	12020101	Cephalosporins	Corticosteroids Used In Nasal Allergy	710	1521317	0.05%	375	273975	0.14%
05010103	11040200	Broad-Spectrum Penicillins	Other Anti-Inflammatory Eye Preparations (For The Eye)	805	1521317	0.05%	374	273975	0.14%
03020000	10010100	Corticosteroids (For Respiratory Conditions)	Non-Steroidal Anti-Inflammatory Drugs	613	1521317	0.04%	373	273975	0.14%
04030000	04070200	Antidepressants	Opioid Analgesics	440	1521317	0.03%	373	273975	0.14%
04020101	04030100	First-Generation Antipsychotic Drugs	Tricyclic And Related Antidepressants	503	1521317	0.03%	372	273975	0.14%
01030500	05010800	Proton Pump Inhibitors	Sulphonamides And Trimethoprim	719	1521317	0.05%	371	273975	0.14%
05010103	13020100	Broad-Spectrum Penicillins	Emollients	862	1521317	0.06%	369	273975	0.13%
03020000	04010100	Corticosteroids (For Respiratory Conditions)	Hypnotics	459	1521317	0.03%	369	273975	0.13%
05010102	06040103	Penicillinase-Resistant Penicillins	Progestogen Products Doubling (In House Use)	1549	1521317	0.10%	368	273975	0.13%
01030500	09060400	Proton Pump Inhibitors	Vitamin D	552	1521317	0.04%	368	273975	0.13%
02090000	07020250	Antiplatelet Products	Preparations For Vaginal And Vulval Candidiasis	812	1521317	0.05%	367	273975	0.13%
02040000	09010101	Beta-Adrenoceptor Blockers	Oral Iron	662	1521317	0.04%	366	273975	0.13%
03040101	04010100	Non-Sedating Antihistamines	Hypnotics	503	1521317	0.03%	366	273975	0.13%
05011100	06040103	Metronidazole And Tinidazole	Progestogen Products Doubling (In House Use)	1488	1521317	0.10%	365	273975	0.13%
03010101	04070401	Selective Beta 2 Agonists	Acute Migraine	447	1521317	0.03%	365	273975	0.13%
04070100	13020101	Non-Opioid And Compound Analgesics	Emollient Bath Additives And Shower Preparations	600	1521317	0.04%	363	273975	0.13%
01050200	07020250	Corticosteroids In Chronic Bowel Problems	Preparations For Vaginal And Vulval Candidiasis	555	1521317	0.04%	363	273975	0.13%
04030100	04070401	Tricyclic And Related Antidepressants	Acute Migraine	519	1521317	0.03%	363	273975	0.13%
04105100	07020250	Substance Dependence - Nicotine Dependence	Preparations For Vaginal And Vulval Candidiasis	934	1521317	0.06%	362	273975	0.13%
04065400	05010201	Products Used Against Nausea And Vertigo - Antihistamines	Cephalosporins	992	1521317	0.07%	361	273975	0.13%
02090000	09010101	Antiplatelet Products	Oral Iron	826	1521317	0.05%	361	273975	0.13%
03010000	04070100	Bronchodilators	Non-Opioid And Compound Analgesics	526	1521317	0.03%	361	273975	0.13%
01060400	05011300	Osmotic Laxatives	Urinary-Tract Infections	834	1521317	0.05%	360	273975	0.13%
02040000	13040000	Beta-Adrenoceptor Blockers	Topical Corticosteroids	536	1521317	0.04%	359	273975	0.13%
03040101	05010500	Non-Sedating Antihistamines	Macrolides	639	1521317	0.04%	358	273975	0.13%
04030300	09010200	Selective Serotonin Re-Uptake Inhibitors (SSRI)	Drugs Used In Megaloblastic Anaemias	465	1521317	0.03%	358	273975	0.13%
05010201	05011100	Cephalosporins	Metronidazole And Tinidazole	1208	1521317	0.08%	357	273975	0.13%
01060100	05010103	Bulk-Forming Laxatives	Broad-Spectrum Penicillins	856	1521317	0.06%	357	273975	0.13%
04030300	13060102	Selective Serotonin Re-Uptake Inhibitors (SSRI)	Topical Antibacterials For Acne	549	1521317	0.04%	357	273975	0.13%
05010500	10010100	Macrolides	Non-Steroidal Anti-Inflammatory Drugs	840	1521317	0.06%	355	273975	0.13%
04020102	05010103	Second-Generation Antipsychotic Drugs	Broad-Spectrum Penicillins	388	1521317	0.03%	354	273975	0.13%
06020100	06040102	Thyroid Hormones	Progestogens And Progesterone Receptor Modulators	549	1521317	0.04%	352	273975	0.13%
07020250	13020100	Preparations For Vaginal And Vulval Candidiasis	Emollients	893	1521317	0.06%	351	273975	0.13%
04030300	12010151	Selective Serotonin Re-Uptake Inhibitors (SSRI)	Anti-Inflammatory Preparations	484	1521317	0.03%	351	273975	0.13%
04030400	09010101	Other Antidepressants	Oral Iron	422	1521317	0.03%	351	273975	0.13%
09010101	13020102	Oral Iron	Emollient Skin Preparations	940	1521317	0.06%	350	273975	0.13%
03010101	05011100	Selective Beta 2 Agonists	Metronidazole And Tinidazole	567	1521317	0.04%	350	273975	0.13%
05010103	05020100	Broad-Spectrum Penicillins	Triazole Antifungals	859	1521317	0.06%	349	273975	0.13%
05010103	13020101	Broad-Spectrum Penicillins	Emollient Bath Additives And Shower Preparations	612	1521317	0.04%	349	273975	0.13%
01030500	06010202	Proton Pump Inhibitors	Biguanides (Metformin)	401	1521317	0.03%	348	273975	0.13%
13040000	13090100	Topical Corticosteroids	Shampoos And Other Scalp Preparations	639	1521317	0.04%	347	273975	0.13%
04070200	09010101	Opioid Analgesics	Oral Iron	556	1521317	0.04%	347	273975	0.13%
03010101	06040102	Selective Beta 2 Agonists	Progestogens And Progesterone Receptor Modulators	541	1521317	0.04%	347	273975	0.13%
13020102	13020103	Emollient Skin Preparations	Antimicrobial Emollients	751	1521317	0.05%	346	273975	0.13%
03040102	07020250	Sedating Antihistamines	Preparations For Vaginal And Vulval Candidiasis	766	1521317	0.05%	345	273975	0.13%
04065500	04070200	Products Used Against Nausea And Vertigo - Domperidone & Metoclopramide	Opioid Analgesics	510	1521317	0.03%	342	273975	0.12%
04020101	04070200	First-Generation Antipsychotic Drugs	Opioid Analgesics	510	1521317	0.03%	342	273975	0.12%
01070200	04070100	Compound Haemorrhoid Products With Corticosteroids	Non-Opioid And Compound Analgesics	732	1521317	0.05%	341	273975	0.12%
04010100	09010101	Hypnotics	Oral Iron	604	1521317	0.04%	341	273975	0.12%
04020000	04030300	Products Used In Psychoses And Related Disorders	Selective Serotonin Re-Uptake Inhibitors (SSRI)	371	1521317	0.02%	341	273975	0.12%
04030400	06020100	Other Antidepressants	Thyroid Hormones	349	1521317	0.02%	338	273975	0.12%
04020101	05010201	First-Generation Antipsychotic Drugs	Cephalosporins	1029	1521317	0.07%	336	273975	0.12%
05010800	10010100	Sulphonamides And Trimethoprim	Non-Steroidal Anti-Inflammatory Drugs	872	1521317	0.06%	336	273975	0.12%
04020000	04080100	Products Used In Psychoses And Related Disorders	Control Of Epilepsy	587	1521317	0.04%	336	273975	0.12%
04070401	05010103	Acute Migraine	Broad-Spectrum Penicillins	560	1521317	0.04%	336	273975	0.12%
02040000	04070401	Beta-Adrenoceptor Blockers	Acute Migraine	523	1521317	0.03%	336	273975	0.12%
03020000	04010201	Corticosteroids (For Respiratory Conditions)	Benzodiazepines	391	1521317	0.03%	335	273975	0.12%
01010201	06040103	Compound Alginate Preparations	Progestogen Products Doubling (In House Use)	993	1521317	0.07%	334	273975	0.12%
04065400	13040000	Products Used Against Nausea And Vertigo - Antihistamines	Topical Corticosteroids	794	1521317	0.05%	334	273975	0.12%
10010100	12020101	Non-Steroidal Anti-Inflammatory Drugs	Corticosteroids Used In Nasal Allergy	633	1521317	0.04%	334	273975	0.12%
03020000	13020101	Corticosteroids (For Respiratory Conditions)	Emollient Bath Additives And Shower Preparations	457	1521317	0.03%	334	273975	0.12%
02090000	04060000	Antiplatelet Products	Products Used Against Nausea And Vertigo	744	1521317	0.05%	332	273975	0.12%
02090000	13040000	Antiplatelet Products	Topical Corticosteroids	656	1521317	0.04%	332	273975	0.12%
04060000	10010100	Products Used Against Nausea And Vertigo	Non-Steroidal Anti-Inflammatory Drugs	738	1521317	0.05%	331	273975	0.12%
06010202	07020250	Biguanides (Metformin)	Preparations For Vaginal And Vulval Candidiasis	455	1521317	0.03%	331	273975	0.12%
05010102	13020102	Penicillinase-Resistant Penicillins	Emollient Skin Preparations	769	1521317	0.05%	329	273975	0.12%
01040200	10010100	Antimotility Products	Non-Steroidal Anti-Inflammatory Drugs	644	1521317	0.04%	329	273975	0.12%
03040101	05010201	Non-Sedating Antihistamines	Cephalosporins	639	1521317	0.04%	329	273975	0.12%
03010101	03010200	Selective Beta 2 Agonists	Antimuscarinic Bronchodilators	396	1521317	0.03%	329	273975	0.12%
04030100	09010101	Tricyclic And Related Antidepressants	Oral Iron	482	1521317	0.03%	326	273975	0.12%
05010300	05011100	Tetracyclines	Metronidazole And Tinidazole	1088	1521317	0.07%	325	273975	0.12%
02120400	06010202	Statins	Biguanides (Metformin)	383	1521317	0.03%	324	273975	0.12%
13040000	13050200	Topical Corticosteroids	Preparations For Psoriasis	654	1521317	0.04%	323	273975	0.12%
03040101	05010102	Non-Sedating Antihistamines	Penicillinase-Resistant Penicillins	725	1521317	0.05%	322	273975	0.12%
03010101	13020103	Selective Beta 2 Agonists	Antimicrobial Emollients	441	1521317	0.03%	322	273975	0.12%
04010100	04065400	Hypnotics	Products Used Against Nausea And Vertigo - Antihistamines	734	1521317	0.05%	321	273975	0.12%
04010100	05010201	Hypnotics	Cephalosporins	621	1521317	0.04%	321	273975	0.12%
05010102	10010100	Penicillinase-Resistant Penicillins	Non-Steroidal Anti-Inflammatory Drugs	846	1521317	0.06%	320	273975	0.12%
04070100	13100101	Non-Opioid And Compound Analgesics	Antibacterial Preparations Only Used Topically	711	1521317	0.05%	319	273975	0.12%
05010103	06040102	Broad-Spectrum Penicillins	Progestogens And Progesterone Receptor Modulators	789	1521317	0.05%	318	273975	0.12%
04070200	05010201	Opioid Analgesics	Cephalosporins	522	1521317	0.03%	318	273975	0.12%
01060100	03010101	Bulk-Forming Laxatives	Selective Beta 2 Agonists	487	1521317	0.03%	318	273975	0.12%
01060400	02040000	Osmotic Laxatives	Beta-Adrenoceptor Blockers	490	1521317	0.03%	317	273975	0.12%
04070200	06020100	Opioid Analgesics	Thyroid Hormones	365	1521317	0.02%	317	273975	0.12%
01060400	02090000	Osmotic Laxatives	Antiplatelet Products	677	1521317	0.04%	316	273975	0.12%
03010000	13040000	Bronchodilators	Topical Corticosteroids	481	1521317	0.03%	316	273975	0.12%
03020000	13020100	Corticosteroids (For Respiratory Conditions)	Emollients	470	1521317	0.03%	316	273975	0.12%
03040101	04010201	Non-Sedating Antihistamines	Benzodiazepines	389	1521317	0.03%	316	273975	0.12%
05010101	13040000	Benzylpenicillin And Phenoxymethylpenicillin	Topical Corticosteroids	882	1521317	0.06%	315	273975	0.11%
04060000	06040103	Products Used Against Nausea And Vertigo	Progestogen Products Doubling (In House Use)	877	1521317	0.06%	315	273975	0.11%
01040200	07020250	Antimotility Products	Preparations For Vaginal And Vulval Candidiasis	592	1521317	0.04%	315	273975	0.11%
01010201	01020200	Compound Alginate Preparations	Other Antispasmodics	568	1521317	0.04%	315	273975	0.11%
04105100	13040000	Substance Dependence - Nicotine Dependence	Topical Corticosteroids	704	1521317	0.05%	313	273975	0.11%
13040000	13100101	Topical Corticosteroids	Antibacterial Preparations Only Used Topically	741	1521317	0.05%	312	273975	0.11%
05010103	13100101	Broad-Spectrum Penicillins	Antibacterial Preparations Only Used Topically	780	1521317	0.05%	311	273975	0.11%
03010101	11030100	Selective Beta 2 Agonists	Antibacterials (In Eye Preparation)	587	1521317	0.04%	311	273975	0.11%
01040200	04030100	Antimotility Products	Tricyclic And Related Antidepressants	410	1521317	0.03%	311	273975	0.11%
05010800	13040000	Sulphonamides And Trimethoprim	Topical Corticosteroids	771	1521317	0.05%	310	273975	0.11%
04030100	05010201	Tricyclic And Related Antidepressants	Cephalosporins	452	1521317	0.03%	310	273975	0.11%
04070200	12020101	Opioid Analgesics	Corticosteroids Used In Nasal Allergy	380	1521317	0.02%	310	273975	0.11%
04030100	12020101	Tricyclic And Related Antidepressants	Corticosteroids Used In Nasal Allergy	374	1521317	0.02%	310	273975	0.11%
04030400	05010201	Other Antidepressants	Cephalosporins	359	1521317	0.02%	309	273975	0.11%
01060100	07020250	Bulk-Forming Laxatives	Preparations For Vaginal And Vulval Candidiasis	817	1521317	0.05%	308	273975	0.11%
01010201	13020100	Compound Alginate Preparations	Emollients	697	1521317	0.05%	307	273975	0.11%
02040000	03010101	Beta-Adrenoceptor Blockers	Selective Beta 2 Agonists	387	1521317	0.03%	307	273975	0.11%
05010103	09060400	Broad-Spectrum Penicillins	Vitamin D	690	1521317	0.05%	306	273975	0.11%
04070100	05020100	Non-Opioid And Compound Analgesics	Triazole Antifungals	608	1521317	0.04%	305	273975	0.11%
04070100	06040102	Non-Opioid And Compound Analgesics	Progestogens And Progesterone Receptor Modulators	582	1521317	0.04%	304	273975	0.11%
01030500	01060200	Proton Pump Inhibitors	Stimulant Laxatives	452	1521317	0.03%	304	273975	0.11%
04030300	04065600	Selective Serotonin Re-Uptake Inhibitors (SSRI)	Products Used Against Nausea And Vertigo - 5 HT3 Antagonists	412	1521317	0.03%	304	273975	0.11%
03010101	04080100	Selective Beta 2 Agonists	Control Of Epilepsy	327	1521317	0.02%	304	273975	0.11%
05011300	13040000	Urinary-Tract Infections	Topical Corticosteroids	704	1521317	0.05%	303	273975	0.11%
04070100	04070402	Non-Opioid And Compound Analgesics	Prophylaxis Of Migraine	411	1521317	0.03%	302	273975	0.11%
04020101	10010100	First-Generation Antipsychotic Drugs	Non-Steroidal Anti-Inflammatory Drugs	663	1521317	0.04%	301	273975	0.11%
04070100	11030100	Non-Opioid And Compound Analgesics	Antibacterials (In Eye Preparation)	771	1521317	0.05%	300	273975	0.11%
04010100	06020100	Hypnotics	Thyroid Hormones	360	1521317	0.02%	300	273975	0.11%
02090000	06040102	Antiplatelet Products	Progestogens And Progesterone Receptor Modulators	850	1521317	0.06%	298	273975	0.11%
04030000	04030400	Antidepressants	Other Antidepressants	327	1521317	0.02%	298	273975	0.11%
04020102	04030100	Second-Generation Antipsychotic Drugs	Tricyclic And Related Antidepressants	313	1521317	0.02%	298	273975	0.11%
01010201	03040102	Compound Alginate Preparations	Sedating Antihistamines	700	1521317	0.05%	297	273975	0.11%
04070100	09010200	Non-Opioid And Compound Analgesics	Drugs Used In Megaloblastic Anaemias	485	1521317	0.03%	295	273975	0.11%
02050501	04070100	Angiotensin-Converting Enzyme Inhibitors (ACE Inhibitors)	Non-Opioid And Compound Analgesics	345	1521317	0.02%	295	273975	0.11%
04070100	12030100	Non-Opioid And Compound Analgesics	Drugs For Oral Ulceration And Inflammation	792	1521317	0.05%	294	273975	0.11%
01030500	03040102	Proton Pump Inhibitors	Sedating Antihistamines	445	1521317	0.03%	294	273975	0.11%
03010000	03040101	Bronchodilators	Non-Sedating Antihistamines	419	1521317	0.03%	294	273975	0.11%
04030400	04065400	Other Antidepressants	Products Used Against Nausea And Vertigo - Antihistamines	348	1521317	0.02%	294	273975	0.11%
01060200	03010101	Stimulant Laxatives	Selective Beta 2 Agonists	387	1521317	0.03%	293	273975	0.11%
01030500	04070300	Proton Pump Inhibitors	Neuropathic Pain	362	1521317	0.02%	293	273975	0.11%
03030200	05010103	Leukotriene Receptor Antagonists	Broad-Spectrum Penicillins	386	1521317	0.03%	292	273975	0.11%
04065500	05010201	Products Used Against Nausea And Vertigo - Domperidone & Metoclopramide	Cephalosporins	784	1521317	0.05%	291	273975	0.11%
04020101	06020100	First-Generation Antipsychotic Drugs	Thyroid Hormones	430	1521317	0.03%	291	273975	0.11%
01050100	01050200	Aminosalicylates	Corticosteroids In Chronic Bowel Problems	521	1521317	0.03%	290	273975	0.11%
06010202	09010101	Biguanides (Metformin)	Oral Iron	437	1521317	0.03%	290	273975	0.11%
04070200	05010500	Opioid Analgesics	Macrolides	418	1521317	0.03%	290	273975	0.11%
04010201	09010101	Benzodiazepines	Oral Iron	400	1521317	0.03%	290	273975	0.11%
05010102	13100101	Penicillinase-Resistant Penicillins	Antibacterial Preparations Only Used Topically	1002	1521317	0.07%	289	273975	0.11%
04070100	12010151	Non-Opioid And Compound Analgesics	Anti-Inflammatory Preparations	685	1521317	0.05%	289	273975	0.11%
01060400	05010500	Osmotic Laxatives	Macrolides	629	1521317	0.04%	289	273975	0.11%
01010201	04105100	Compound Alginate Preparations	Substance Dependence - Nicotine Dependence	630	1521317	0.04%	288	273975	0.11%
04010100	05010500	Hypnotics	Macrolides	430	1521317	0.03%	288	273975	0.11%
04030300	10030250	Selective Serotonin Re-Uptake Inhibitors (SSRI)	Topical Nsaids And Counter Irritants	390	1521317	0.03%	288	273975	0.11%
04010100	12020101	Hypnotics	Corticosteroids Used In Nasal Allergy	387	1521317	0.03%	288	273975	0.11%
01070200	07020250	Compound Haemorrhoid Products With Corticosteroids	Preparations For Vaginal And Vulval Candidiasis	906	1521317	0.06%	287	273975	0.10%
01060400	05010800	Osmotic Laxatives	Sulphonamides And Trimethoprim	704	1521317	0.05%	287	273975	0.10%
04020102	04070200	Second-Generation Antipsychotic Drugs	Opioid Analgesics	298	1521317	0.02%	287	273975	0.10%
04020101	09010101	First-Generation Antipsychotic Drugs	Oral Iron	866	1521317	0.06%	286	273975	0.10%
01060200	05010103	Stimulant Laxatives	Broad-Spectrum Penicillins	605	1521317	0.04%	286	273975	0.10%
03040101	04020101	Non-Sedating Antihistamines	First-Generation Antipsychotic Drugs	506	1521317	0.03%	286	273975	0.10%
04030400	05010800	Other Antidepressants	Sulphonamides And Trimethoprim	349	1521317	0.02%	286	273975	0.10%
03010101	06010101	Selective Beta 2 Agonists	Short-Acting Insulins	301	1521317	0.02%	286	273975	0.10%
07020250	13020101	Preparations For Vaginal And Vulval Candidiasis	Emollient Bath Additives And Shower Preparations	545	1521317	0.04%	285	273975	0.10%
01050200	03030200	Corticosteroids In Chronic Bowel Problems	Leukotriene Receptor Antagonists	381	1521317	0.03%	285	273975	0.10%
04030300	04050100	Selective Serotonin Re-Uptake Inhibitors (SSRI)	Anti-Obesity Products Acting On The Gastro-Intestinal Tract	359	1521317	0.02%	285	273975	0.10%
05010500	05011100	Macrolides	Metronidazole And Tinidazole	920	1521317	0.06%	284	273975	0.10%
04060000	13020102	Products Used Against Nausea And Vertigo	Emollient Skin Preparations	602	1521317	0.04%	284	273975	0.10%
03010101	13100101	Selective Beta 2 Agonists	Antibacterial Preparations Only Used Topically	473	1521317	0.03%	284	273975	0.10%
04070100	09060700	Non-Opioid And Compound Analgesics	Multivitamin And Multimineral Preparations	598	1521317	0.04%	283	273975	0.10%
03020000	03040102	Corticosteroids (For Respiratory Conditions)	Sedating Antihistamines	439	1521317	0.03%	283	273975	0.10%
01030100	07020250	H2-Receptor Antagonists	Preparations For Vaginal And Vulval Candidiasis	576	1521317	0.04%	282	273975	0.10%
13020101	13020103	Emollient Bath Additives And Shower Preparations	Antimicrobial Emollients	556	1521317	0.04%	282	273975	0.10%
03010101	06010102	Selective Beta 2 Agonists	Intermediate- And Long-Acting Insulins	299	1521317	0.02%	282	273975	0.10%
05010300	06040103	Tetracyclines	Progestogen Products Doubling (In House Use)	995	1521317	0.07%	281	273975	0.10%
09010101	09010200	Oral Iron	Drugs Used In Megaloblastic Anaemias	638	1521317	0.04%	281	273975	0.10%
04070401	10010100	Acute Migraine	Non-Steroidal Anti-Inflammatory Drugs	463	1521317	0.03%	278	273975	0.10%
01050200	09010101	Corticosteroids In Chronic Bowel Problems	Oral Iron	458	1521317	0.03%	278	273975	0.10%
03020000	04020101	Corticosteroids (For Respiratory Conditions)	First-Generation Antipsychotic Drugs	449	1521317	0.03%	278	273975	0.10%
04030100	04065500	Tricyclic And Related Antidepressants	Products Used Against Nausea And Vertigo - Domperidone & Metoclopramide	389	1521317	0.03%	278	273975	0.10%
01040200	04010201	Antimotility Products	Benzodiazepines	366	1521317	0.02%	278	273975	0.10%
04065400	09010101	Products Used Against Nausea And Vertigo - Antihistamines	Oral Iron	800	1521317	0.05%	277	273975	0.10%
01010201	05011300	Compound Alginate Preparations	Urinary-Tract Infections	701	1521317	0.05%	277	273975	0.10%
07020250	11040200	Preparations For Vaginal And Vulval Candidiasis	Other Anti-Inflammatory Eye Preparations (For The Eye)	638	1521317	0.04%	277	273975	0.10%
03040102	04060000	Sedating Antihistamines	Products Used Against Nausea And Vertigo	665	1521317	0.04%	276	273975	0.10%
01010201	11040200	Compound Alginate Preparations	Other Anti-Inflammatory Eye Preparations (For The Eye)	578	1521317	0.04%	276	273975	0.10%
05010300	13040000	Tetracyclines	Topical Corticosteroids	537	1521317	0.04%	276	273975	0.10%
03030200	12020101	Leukotriene Receptor Antagonists	Corticosteroids Used In Nasal Allergy	315	1521317	0.02%	276	273975	0.10%
02080100	06040102	Parenteral Anticoagulants	Progestogens And Progesterone Receptor Modulators	718	1521317	0.05%	275	273975	0.10%
01060400	04105100	Osmotic Laxatives	Substance Dependence - Nicotine Dependence	621	1521317	0.04%	275	273975	0.10%
11040200	13020102	Other Anti-Inflammatory Eye Preparations (For The Eye)	Emollient Skin Preparations	451	1521317	0.03%	275	273975	0.10%
01020200	07020250	Other Antispasmodics	Preparations For Vaginal And Vulval Candidiasis	568	1521317	0.04%	274	273975	0.10%
01030500	04070401	Proton Pump Inhibitors	Acute Migraine	359	1521317	0.02%	272	273975	0.10%
02050501	04030300	Angiotensin-Converting Enzyme Inhibitors (ACE Inhibitors)	Selective Serotonin Re-Uptake Inhibitors (SSRI)	282	1521317	0.02%	272	273975	0.10%
10010100	13020102	Non-Steroidal Anti-Inflammatory Drugs	Emollient Skin Preparations	540	1521317	0.04%	269	273975	0.10%
01030500	05010102	Proton Pump Inhibitors	Penicillinase-Resistant Penicillins	454	1521317	0.03%	269	273975	0.10%
04065400	04070200	Products Used Against Nausea And Vertigo - Antihistamines	Opioid Analgesics	396	1521317	0.03%	269	273975	0.10%
02040000	04020101	Beta-Adrenoceptor Blockers	First-Generation Antipsychotic Drugs	387	1521317	0.03%	269	273975	0.10%
01050200	04070200	Corticosteroids In Chronic Bowel Problems	Opioid Analgesics	324	1521317	0.02%	269	273975	0.10%
04065400	04065600	Products Used Against Nausea And Vertigo - Antihistamines	Products Used Against Nausea And Vertigo - 5 HT3 Antagonists	764	1521317	0.05%	268	273975	0.10%
05011100	10010100	Metronidazole And Tinidazole	Non-Steroidal Anti-Inflammatory Drugs	720	1521317	0.05%	268	273975	0.10%
03010101	03010300	Selective Beta 2 Agonists	Theophylline	345	1521317	0.02%	268	273975	0.10%
04030100	04070300	Tricyclic And Related Antidepressants	Neuropathic Pain	345	1521317	0.02%	268	273975	0.10%
04020101	04065600	First-Generation Antipsychotic Drugs	Products Used Against Nausea And Vertigo - 5 HT3 Antagonists	798	1521317	0.05%	267	273975	0.10%
01070200	05010103	Compound Haemorrhoid Products With Corticosteroids	Broad-Spectrum Penicillins	769	1521317	0.05%	267	273975	0.10%
04065500	13040000	Products Used Against Nausea And Vertigo - Domperidone & Metoclopramide	Topical Corticosteroids	609	1521317	0.04%	266	273975	0.10%
01030100	01060400	H2-Receptor Antagonists	Osmotic Laxatives	554	1521317	0.04%	266	273975	0.10%
01060200	04070200	Stimulant Laxatives	Opioid Analgesics	355	1521317	0.02%	266	273975	0.10%
05010300	07020250	Tetracyclines	Preparations For Vaginal And Vulval Candidiasis	658	1521317	0.04%	265	273975	0.10%
04065500	10010100	Products Used Against Nausea And Vertigo - Domperidone & Metoclopramide	Non-Steroidal Anti-Inflammatory Drugs	581	1521317	0.04%	265	273975	0.10%
01050100	01050300	Aminosalicylates	Products Affecting The Immune Response In Chronic Bowel Problems	463	1521317	0.03%	264	273975	0.10%
01030100	03040101	H2-Receptor Antagonists	Non-Sedating Antihistamines	409	1521317	0.03%	264	273975	0.10%
05010500	06020100	Macrolides	Thyroid Hormones	390	1521317	0.03%	264	273975	0.10%
05011300	06040103	Urinary-Tract Infections	Progestogen Products Doubling (In House Use)	823	1521317	0.05%	263	273975	0.10%
05020100	13040000	Triazole Antifungals	Topical Corticosteroids	623	1521317	0.04%	263	273975	0.10%
05010201	13020102	Cephalosporins	Emollient Skin Preparations	592	1521317	0.04%	263	273975	0.10%
02090000	09060400	Antiplatelet Products	Vitamin D	530	1521317	0.03%	263	273975	0.10%
03010000	12020101	Bronchodilators	Corticosteroids Used In Nasal Allergy	373	1521317	0.02%	263	273975	0.10%
01030100	04065500	H2-Receptor Antagonists	Products Used Against Nausea And Vertigo - Domperidone & Metoclopramide	635	1521317	0.04%	262	273975	0.10%
05011300	06020100	Urinary-Tract Infections	Thyroid Hormones	382	1521317	0.03%	262	273975	0.10%
04020101	06040103	First-Generation Antipsychotic Drugs	Progestogen Products Doubling (In House Use)	797	1521317	0.05%	261	273975	0.10%
03030200	04030300	Leukotriene Receptor Antagonists	Selective Serotonin Re-Uptake Inhibitors (SSRI)	275	1521317	0.02%	261	273975	0.10%
01010201	05010800	Compound Alginate Preparations	Sulphonamides And Trimethoprim	624	1521317	0.04%	260	273975	0.09%
04020101	12020101	First-Generation Antipsychotic Drugs	Corticosteroids Used In Nasal Allergy	472	1521317	0.03%	260	273975	0.09%
01010201	01050200	Compound Alginate Preparations	Corticosteroids In Chronic Bowel Problems	385	1521317	0.03%	260	273975	0.09%
01040200	04010100	Antimotility Products	Hypnotics	350	1521317	0.02%	260	273975	0.09%
01030500	03030200	Proton Pump Inhibitors	Leukotriene Receptor Antagonists	291	1521317	0.02%	260	273975	0.09%
04065400	05011300	Products Used Against Nausea And Vertigo - Antihistamines	Urinary-Tract Infections	741	1521317	0.05%	259	273975	0.09%
01050200	05010201	Corticosteroids In Chronic Bowel Problems	Cephalosporins	448	1521317	0.03%	259	273975	0.09%
02110000	10010100	Antifibrinolytic Products And Haemostatics	Non-Steroidal Anti-Inflammatory Drugs	665	1521317	0.04%	257	273975	0.09%
05010500	09010101	Macrolides	Oral Iron	724	1521317	0.05%	256	273975	0.09%
04030100	04065400	Tricyclic And Related Antidepressants	Products Used Against Nausea And Vertigo - Antihistamines	386	1521317	0.03%	256	273975	0.09%
04030100	05010500	Tricyclic And Related Antidepressants	Macrolides	341	1521317	0.02%	256	273975	0.09%
03010101	09010200	Selective Beta 2 Agonists	Drugs Used In Megaloblastic Anaemias	320	1521317	0.02%	256	273975	0.09%
01010201	01040200	Compound Alginate Preparations	Antimotility Products	475	1521317	0.03%	255	273975	0.09%
04010201	05010201	Benzodiazepines	Cephalosporins	388	1521317	0.03%	255	273975	0.09%
05010101	06040103	Benzylpenicillin And Phenoxymethylpenicillin	Progestogen Products Doubling (In House Use)	1334	1521317	0.09%	254	273975	0.09%
03010101	05020100	Selective Beta 2 Agonists	Triazole Antifungals	388	1521317	0.03%	254	273975	0.09%
01020200	04030100	Other Antispasmodics	Tricyclic And Related Antidepressants	345	1521317	0.02%	254	273975	0.09%
01020200	04070200	Other Antispasmodics	Opioid Analgesics	329	1521317	0.02%	254	273975	0.09%
01060400	04065600	Osmotic Laxatives	Products Used Against Nausea And Vertigo - 5 HT3 Antagonists	661	1521317	0.04%	253	273975	0.09%
01020000	04070100	Antispasmodics And Products Affecting Motility	Non-Opioid And Compound Analgesics	444	1521317	0.03%	253	273975	0.09%
01030500	04030000	Proton Pump Inhibitors	Antidepressants	285	1521317	0.02%	253	273975	0.09%
05011100	13040000	Metronidazole And Tinidazole	Topical Corticosteroids	649	1521317	0.04%	252	273975	0.09%
04070200	04070401	Opioid Analgesics	Acute Migraine	330	1521317	0.02%	252	273975	0.09%
02090000	02120400	Antiplatelet Products	Statins	306	1521317	0.02%	252	273975	0.09%
01020200	06040103	Other Antispasmodics	Progestogen Products Doubling (In House Use)	636	1521317	0.04%	251	273975	0.09%
01020200	10010100	Other Antispasmodics	Non-Steroidal Anti-Inflammatory Drugs	452	1521317	0.03%	250	273975	0.09%
11030100	13040000	Antibacterials (In Eye Preparation)	Topical Corticosteroids	638	1521317	0.04%	249	273975	0.09%
06010202	06040102	Biguanides (Metformin)	Progestogens And Progesterone Receptor Modulators	421	1521317	0.03%	249	273975	0.09%
04070200	05010800	Opioid Analgesics	Sulphonamides And Trimethoprim	406	1521317	0.03%	249	273975	0.09%
05010800	06020100	Sulphonamides And Trimethoprim	Thyroid Hormones	354	1521317	0.02%	249	273975	0.09%
04010201	05010500	Benzodiazepines	Macrolides	336	1521317	0.02%	249	273975	0.09%
04030300	13020103	Selective Serotonin Re-Uptake Inhibitors (SSRI)	Antimicrobial Emollients	323	1521317	0.02%	249	273975	0.09%
04020101	05011300	First-Generation Antipsychotic Drugs	Urinary-Tract Infections	646	1521317	0.04%	248	273975	0.09%
04010100	05010800	Hypnotics	Sulphonamides And Trimethoprim	396	1521317	0.03%	248	273975	0.09%
01050200	09060400	Corticosteroids In Chronic Bowel Problems	Vitamin D	326	1521317	0.02%	248	273975	0.09%
02050501	02120400	Angiotensin-Converting Enzyme Inhibitors (ACE Inhibitors)	Statins	300	1521317	0.02%	248	273975	0.09%
01060100	01060200	Bulk-Forming Laxatives	Stimulant Laxatives	577	1521317	0.04%	247	273975	0.09%
01010201	01060200	Compound Alginate Preparations	Stimulant Laxatives	533	1521317	0.04%	247	273975	0.09%
01010201	05010102	Compound Alginate Preparations	Penicillinase-Resistant Penicillins	610	1521317	0.04%	246	273975	0.09%
01050200	06040102	Corticosteroids In Chronic Bowel Problems	Progestogens And Progesterone Receptor Modulators	575	1521317	0.04%	246	273975	0.09%
03040102	13020101	Sedating Antihistamines	Emollient Bath Additives And Shower Preparations	491	1521317	0.03%	246	273975	0.09%
01050200	01050300	Corticosteroids In Chronic Bowel Problems	Products Affecting The Immune Response In Chronic Bowel Problems	375	1521317	0.02%	246	273975	0.09%
04030100	05010800	Tricyclic And Related Antidepressants	Sulphonamides And Trimethoprim	366	1521317	0.02%	246	273975	0.09%
01020200	03040101	Other Antispasmodics	Non-Sedating Antihistamines	363	1521317	0.02%	246	273975	0.09%
02040000	03040101	Beta-Adrenoceptor Blockers	Non-Sedating Antihistamines	357	1521317	0.02%	246	273975	0.09%
02090000	04030100	Antiplatelet Products	Tricyclic And Related Antidepressants	328	1521317	0.02%	245	273975	0.09%
05010300	12020101	Tetracyclines	Corticosteroids Used In Nasal Allergy	479	1521317	0.03%	244	273975	0.09%
03020000	04105100	Corticosteroids (For Respiratory Conditions)	Substance Dependence - Nicotine Dependence	422	1521317	0.03%	244	273975	0.09%
04030300	04070402	Selective Serotonin Re-Uptake Inhibitors (SSRI)	Prophylaxis Of Migraine	272	1521317	0.02%	244	273975	0.09%
03020000	04065400	Corticosteroids (For Respiratory Conditions)	Products Used Against Nausea And Vertigo - Antihistamines	411	1521317	0.03%	243	273975	0.09%
01020200	04030400	Other Antispasmodics	Other Antidepressants	266	1521317	0.02%	243	273975	0.09%
05010102	09010101	Penicillinase-Resistant Penicillins	Oral Iron	766	1521317	0.05%	242	273975	0.09%
03040101	05010300	Non-Sedating Antihistamines	Tetracyclines	428	1521317	0.03%	242	273975	0.09%
02050501	02060200	Angiotensin-Converting Enzyme Inhibitors (ACE Inhibitors)	Calcium-Channel Blockers	341	1521317	0.02%	242	273975	0.09%
06010202	13040000	Biguanides (Metformin)	Topical Corticosteroids	327	1521317	0.02%	242	273975	0.09%
04030300	13090000	Selective Serotonin Re-Uptake Inhibitors (SSRI)	Shampoos And Other Preparations For Scalp And Hair Conditions	321	1521317	0.02%	242	273975	0.09%
06010101	09010101	Short-Acting Insulins	Oral Iron	320	1521317	0.02%	242	273975	0.09%
04020102	06040103	Second-Generation Antipsychotic Drugs	Progestogen Products Doubling (In House Use)	267	1521317	0.02%	242	273975	0.09%
04065400	10010100	Products Used Against Nausea And Vertigo - Antihistamines	Non-Steroidal Anti-Inflammatory Drugs	524	1521317	0.03%	241	273975	0.09%
01050200	13020102	Corticosteroids In Chronic Bowel Problems	Emollient Skin Preparations	366	1521317	0.02%	241	273975	0.09%
04030400	04065500	Other Antidepressants	Products Used Against Nausea And Vertigo - Domperidone & Metoclopramide	299	1521317	0.02%	241	273975	0.09%
04030300	09060200	Selective Serotonin Re-Uptake Inhibitors (SSRI)	Vitamin B Group	282	1521317	0.02%	241	273975	0.09%
04065500	09010101	Products Used Against Nausea And Vertigo - Domperidone & Metoclopramide	Oral Iron	706	1521317	0.05%	240	273975	0.09%
01070200	03010101	Compound Haemorrhoid Products With Corticosteroids	Selective Beta 2 Agonists	383	1521317	0.03%	240	273975	0.09%
03040102	04010100	Sedating Antihistamines	Hypnotics	383	1521317	0.03%	240	273975	0.09%
02060200	04070100	Calcium-Channel Blockers	Non-Opioid And Compound Analgesics	307	1521317	0.02%	240	273975	0.09%
03030200	04070100	Leukotriene Receptor Antagonists	Non-Opioid And Compound Analgesics	280	1521317	0.02%	240	273975	0.09%
01040200	01060400	Antimotility Products	Osmotic Laxatives	501	1521317	0.03%	239	273975	0.09%
04010100	13020102	Hypnotics	Emollient Skin Preparations	352	1521317	0.02%	239	273975	0.09%
01070200	13040000	Compound Haemorrhoid Products With Corticosteroids	Topical Corticosteroids	565	1521317	0.04%	238	273975	0.09%
01040200	04060000	Antimotility Products	Products Used Against Nausea And Vertigo	462	1521317	0.03%	238	273975	0.09%
03040101	06010202	Non-Sedating Antihistamines	Biguanides (Metformin)	277	1521317	0.02%	238	273975	0.09%
02120400	06010102	Statins	Intermediate- And Long-Acting Insulins	275	1521317	0.02%	238	273975	0.09%
04065500	06020100	Products Used Against Nausea And Vertigo - Domperidone & Metoclopramide	Thyroid Hormones	310	1521317	0.02%	237	273975	0.09%
04030400	05011300	Other Antidepressants	Urinary-Tract Infections	286	1521317	0.02%	237	273975	0.09%
02120400	04070100	Statins	Non-Opioid And Compound Analgesics	274	1521317	0.02%	237	273975	0.09%
04030400	12020101	Other Antidepressants	Corticosteroids Used In Nasal Allergy	268	1521317	0.02%	237	273975	0.09%
04010201	06020100	Benzodiazepines	Thyroid Hormones	266	1521317	0.02%	237	273975	0.09%
02050501	06010202	Angiotensin-Converting Enzyme Inhibitors (ACE Inhibitors)	Biguanides (Metformin)	262	1521317	0.02%	237	273975	0.09%
04070200	05010102	Opioid Analgesics	Penicillinase-Resistant Penicillins	367	1521317	0.02%	236	273975	0.09%
02040000	05010201	Beta-Adrenoceptor Blockers	Cephalosporins	364	1521317	0.02%	236	273975	0.09%
12020101	13020100	Corticosteroids Used In Nasal Allergy	Emollients	355	1521317	0.02%	236	273975	0.09%
03010101	12010151	Selective Beta 2 Agonists	Anti-Inflammatory Preparations	350	1521317	0.02%	236	273975	0.09%
04065500	06040103	Products Used Against Nausea And Vertigo - Domperidone & Metoclopramide	Progestogen Products Doubling (In House Use)	718	1521317	0.05%	235	273975	0.09%
01010201	05010101	Compound Alginate Preparations	Benzylpenicillin And Phenoxymethylpenicillin	661	1521317	0.04%	235	273975	0.09%
03010101	10030250	Selective Beta 2 Agonists	Topical Nsaids And Counter Irritants	334	1521317	0.02%	235	273975	0.09%
01030500	04105100	Proton Pump Inhibitors	Substance Dependence - Nicotine Dependence	379	1521317	0.02%	234	273975	0.09%
05010101	10010100	Benzylpenicillin And Phenoxymethylpenicillin	Non-Steroidal Anti-Inflammatory Drugs	774	1521317	0.05%	233	273975	0.09%
03040101	05010800	Non-Sedating Antihistamines	Sulphonamides And Trimethoprim	456	1521317	0.03%	233	273975	0.09%
05010102	06020100	Penicillinase-Resistant Penicillins	Thyroid Hormones	348	1521317	0.02%	233	273975	0.09%
04030300	12030100	Selective Serotonin Re-Uptake Inhibitors (SSRI)	Drugs For Oral Ulceration And Inflammation	340	1521317	0.02%	233	273975	0.09%
04080100	05010103	Control Of Epilepsy	Broad-Spectrum Penicillins	339	1521317	0.02%	233	273975	0.09%
02040000	04020102	Beta-Adrenoceptor Blockers	Second-Generation Antipsychotic Drugs	245	1521317	0.02%	233	273975	0.09%
04060000	05010500	Products Used Against Nausea And Vertigo	Macrolides	539	1521317	0.04%	232	273975	0.08%
04030400	05010500	Other Antidepressants	Macrolides	273	1521317	0.02%	232	273975	0.08%
03010101	04070300	Selective Beta 2 Agonists	Neuropathic Pain	251	1521317	0.02%	232	273975	0.08%
01030100	04020101	H2-Receptor Antagonists	First-Generation Antipsychotic Drugs	601	1521317	0.04%	231	273975	0.08%
03040102	11040200	Sedating Antihistamines	Other Anti-Inflammatory Eye Preparations (For The Eye)	597	1521317	0.04%	231	273975	0.08%
01030500	05011100	Proton Pump Inhibitors	Metronidazole And Tinidazole	510	1521317	0.03%	231	273975	0.08%
04030300	05030201	Selective Serotonin Re-Uptake Inhibitors (SSRI)	Herpes Simplex And Varicella-Zoster Infection	341	1521317	0.02%	231	273975	0.08%
04030400	13020102	Other Antidepressants	Emollient Skin Preparations	277	1521317	0.02%	231	273975	0.08%
02040000	06010202	Beta-Adrenoceptor Blockers	Biguanides (Metformin)	254	1521317	0.02%	231	273975	0.08%
01040200	13040000	Antimotility Products	Topical Corticosteroids	396	1521317	0.03%	230	273975	0.08%
04020000	04070100	Products Used In Psychoses And Related Disorders	Non-Opioid And Compound Analgesics	311	1521317	0.02%	230	273975	0.08%
12020101	13020101	Corticosteroids Used In Nasal Allergy	Emollient Bath Additives And Shower Preparations	302	1521317	0.02%	230	273975	0.08%
02040000	02050200	Beta-Adrenoceptor Blockers	Centrally Acting Antihypertensive Products	415	1521317	0.03%	229	273975	0.08%
02090000	03020000	Antiplatelet Products	Corticosteroids (For Respiratory Conditions)	332	1521317	0.02%	229	273975	0.08%
04030300	13060100	Selective Serotonin Re-Uptake Inhibitors (SSRI)	Topical Preparations For Acne	317	1521317	0.02%	229	273975	0.08%
04030100	05011300	Tricyclic And Related Antidepressants	Urinary-Tract Infections	316	1521317	0.02%	229	273975	0.08%
02090000	04070200	Antiplatelet Products	Opioid Analgesics	293	1521317	0.02%	229	273975	0.08%
02120400	04030300	Statins	Selective Serotonin Re-Uptake Inhibitors (SSRI)	239	1521317	0.02%	229	273975	0.08%
04105100	06040103	Substance Dependence - Nicotine Dependence	Progestogen Products Doubling (In House Use)	816	1521317	0.05%	228	273975	0.08%
01020200	13040000	Other Antispasmodics	Topical Corticosteroids	395	1521317	0.03%	228	273975	0.08%
04065400	06020100	Products Used Against Nausea And Vertigo - Antihistamines	Thyroid Hormones	357	1521317	0.02%	228	273975	0.08%
01050200	02090000	Corticosteroids In Chronic Bowel Problems	Antiplatelet Products	355	1521317	0.02%	228	273975	0.08%
01030100	04070200	H2-Receptor Antagonists	Opioid Analgesics	312	1521317	0.02%	228	273975	0.08%
03010101	11080100	Selective Beta 2 Agonists	Tear Deficiency	279	1521317	0.02%	228	273975	0.08%
04030400	05010102	Other Antidepressants	Penicillinase-Resistant Penicillins	269	1521317	0.02%	228	273975	0.08%
04060000	05010800	Products Used Against Nausea And Vertigo	Sulphonamides And Trimethoprim	634	1521317	0.04%	227	273975	0.08%
05010103	12030100	Broad-Spectrum Penicillins	Drugs For Oral Ulceration And Inflammation	621	1521317	0.04%	226	273975	0.08%
04060000	09060400	Products Used Against Nausea And Vertigo	Vitamin D	558	1521317	0.04%	226	273975	0.08%
01040200	06040103	Antimotility Products	Progestogen Products Doubling (In House Use)	495	1521317	0.03%	226	273975	0.08%
05010500	13020102	Macrolides	Emollient Skin Preparations	461	1521317	0.03%	226	273975	0.08%
04020102	07020250	Second-Generation Antipsychotic Drugs	Preparations For Vaginal And Vulval Candidiasis	254	1521317	0.02%	226	273975	0.08%
01060200	07020250	Stimulant Laxatives	Preparations For Vaginal And Vulval Candidiasis	479	1521317	0.03%	225	273975	0.08%
01010201	03010000	Compound Alginate Preparations	Bronchodilators	348	1521317	0.02%	225	273975	0.08%
01010201	06010202	Compound Alginate Preparations	Biguanides (Metformin)	308	1521317	0.02%	225	273975	0.08%
06020100	09010200	Thyroid Hormones	Drugs Used In Megaloblastic Anaemias	293	1521317	0.02%	224	273975	0.08%
04020101	04020102	First-Generation Antipsychotic Drugs	Second-Generation Antipsychotic Drugs	240	1521317	0.02%	224	273975	0.08%
05010300	10010100	Tetracyclines	Non-Steroidal Anti-Inflammatory Drugs	505	1521317	0.03%	223	273975	0.08%
04010100	04105100	Hypnotics	Substance Dependence - Nicotine Dependence	334	1521317	0.02%	223	273975	0.08%
01060400	05010102	Osmotic Laxatives	Penicillinase-Resistant Penicillins	598	1521317	0.04%	222	273975	0.08%
05010300	05010500	Tetracyclines	Macrolides	556	1521317	0.04%	222	273975	0.08%
01060100	13040000	Bulk-Forming Laxatives	Topical Corticosteroids	487	1521317	0.03%	222	273975	0.08%
03020000	05010800	Corticosteroids (For Respiratory Conditions)	Sulphonamides And Trimethoprim	384	1521317	0.03%	222	273975	0.08%
01010201	01070200	Compound Alginate Preparations	Compound Haemorrhoid Products With Corticosteroids	613	1521317	0.04%	221	273975	0.08%
01030500	05010101	Proton Pump Inhibitors	Benzylpenicillin And Phenoxymethylpenicillin	426	1521317	0.03%	221	273975	0.08%
04065500	04065600	Products Used Against Nausea And Vertigo - Domperidone & Metoclopramide	Products Used Against Nausea And Vertigo - 5 HT3 Antagonists	686	1521317	0.05%	220	273975	0.08%
05011300	09010101	Urinary-Tract Infections	Oral Iron	677	1521317	0.04%	220	273975	0.08%
04065400	06040103	Products Used Against Nausea And Vertigo - Antihistamines	Progestogen Products Doubling (In House Use)	660	1521317	0.04%	220	273975	0.08%
01040200	09010101	Antimotility Products	Oral Iron	444	1521317	0.03%	220	273975	0.08%
05010800	09010101	Sulphonamides And Trimethoprim	Oral Iron	661	1521317	0.04%	219	273975	0.08%
07020250	13100101	Preparations For Vaginal And Vulval Candidiasis	Antibacterial Preparations Only Used Topically	644	1521317	0.04%	219	273975	0.08%
01030500	05010300	Proton Pump Inhibitors	Tetracyclines	362	1521317	0.02%	219	273975	0.08%
09010101	13020100	Oral Iron	Emollients	611	1521317	0.04%	218	273975	0.08%
07020250	09060400	Preparations For Vaginal And Vulval Candidiasis	Vitamin D	463	1521317	0.03%	218	273975	0.08%
01050200	10010100	Corticosteroids In Chronic Bowel Problems	Non-Steroidal Anti-Inflammatory Drugs	301	1521317	0.02%	218	273975	0.08%
01060400	03040102	Osmotic Laxatives	Sedating Antihistamines	501	1521317	0.03%	217	273975	0.08%
01020200	01060100	Other Antispasmodics	Bulk-Forming Laxatives	493	1521317	0.03%	217	273975	0.08%
04065400	12020101	Products Used Against Nausea And Vertigo - Antihistamines	Corticosteroids Used In Nasal Allergy	435	1521317	0.03%	217	273975	0.08%
04070100	13090000	Non-Opioid And Compound Analgesics	Shampoos And Other Preparations For Scalp And Hair Conditions	389	1521317	0.03%	217	273975	0.08%
03020000	05010102	Corticosteroids (For Respiratory Conditions)	Penicillinase-Resistant Penicillins	383	1521317	0.03%	217	273975	0.08%
03020000	04065500	Corticosteroids (For Respiratory Conditions)	Products Used Against Nausea And Vertigo - Domperidone & Metoclopramide	360	1521317	0.02%	217	273975	0.08%
04020100	04030300	Antipsychotic Products	Selective Serotonin Re-Uptake Inhibitors (SSRI)	318	1521317	0.02%	217	273975	0.08%
04030300	13100300	Selective Serotonin Re-Uptake Inhibitors (SSRI)	Antiviral Preparations (Topical	303	1521317	0.02%	217	273975	0.08%
04030100	13020102	Tricyclic And Related Antidepressants	Emollient Skin Preparations	269	1521317	0.02%	217	273975	0.08%
02060200	04030300	Calcium-Channel Blockers	Selective Serotonin Re-Uptake Inhibitors (SSRI)	240	1521317	0.02%	217	273975	0.08%
03040102	13020100	Sedating Antihistamines	Emollients	478	1521317	0.03%	216	273975	0.08%
01050200	06040103	Corticosteroids In Chronic Bowel Problems	Progestogen Products Doubling (In House Use)	446	1521317	0.03%	216	273975	0.08%
01020200	04060000	Other Antispasmodics	Products Used Against Nausea And Vertigo	353	1521317	0.02%	216	273975	0.08%
02050200	02090000	Centrally Acting Antihypertensive Products	Antiplatelet Products	336	1521317	0.02%	216	273975	0.08%
01040200	04030400	Antimotility Products	Other Antidepressants	242	1521317	0.02%	216	273975	0.08%
09010101	09050101	Oral Iron	Calcium Supplements	597	1521317	0.04%	215	273975	0.08%
13020102	13090000	Emollient Skin Preparations	Shampoos And Other Preparations For Scalp And Hair Conditions	440	1521317	0.03%	215	273975	0.08%
03040101	04065400	Non-Sedating Antihistamines	Products Used Against Nausea And Vertigo - Antihistamines	415	1521317	0.03%	215	273975	0.08%
03040101	05011300	Non-Sedating Antihistamines	Urinary-Tract Infections	372	1521317	0.02%	215	273975	0.08%
04020102	04060000	Second-Generation Antipsychotic Drugs	Products Used Against Nausea And Vertigo	233	1521317	0.02%	215	273975	0.08%
01010201	09060400	Compound Alginate Preparations	Vitamin D	552	1521317	0.04%	214	273975	0.08%
04070200	04105100	Opioid Analgesics	Substance Dependence - Nicotine Dependence	320	1521317	0.02%	214	273975	0.08%
01060200	04030100	Stimulant Laxatives	Tricyclic And Related Antidepressants	267	1521317	0.02%	214	273975	0.08%
04010201	12020101	Benzodiazepines	Corticosteroids Used In Nasal Allergy	266	1521317	0.02%	214	273975	0.08%
07020250	13040200	Preparations For Vaginal And Vulval Candidiasis	Mild Topical Corticosteroids	686	1521317	0.05%	213	273975	0.08%
04010201	04065400	Benzodiazepines	Products Used Against Nausea And Vertigo - Antihistamines	295	1521317	0.02%	213	273975	0.08%
03010101	13090000	Selective Beta 2 Agonists	Shampoos And Other Preparations For Scalp And Hair Conditions	287	1521317	0.02%	213	273975	0.08%
04030000	04030100	Antidepressants	Tricyclic And Related Antidepressants	252	1521317	0.02%	213	273975	0.08%
01030500	01060100	Proton Pump Inhibitors	Bulk-Forming Laxatives	378	1521317	0.02%	212	273975	0.08%
01050200	05010300	Corticosteroids In Chronic Bowel Problems	Tetracyclines	307	1521317	0.02%	212	273975	0.08%
01030500	09010200	Proton Pump Inhibitors	Drugs Used In Megaloblastic Anaemias	301	1521317	0.02%	212	273975	0.08%
06010102	09010101	Intermediate- And Long-Acting Insulins	Oral Iron	279	1521317	0.02%	212	273975	0.08%
07020250	11030100	Preparations For Vaginal And Vulval Candidiasis	Antibacterials (In Eye Preparation)	637	1521317	0.04%	211	273975	0.08%
04060000	05010102	Products Used Against Nausea And Vertigo	Penicillinase-Resistant Penicillins	488	1521317	0.03%	211	273975	0.08%
06040102	13040000	Progestogens And Progesterone Receptor Modulators	Topical Corticosteroids	450	1521317	0.03%	211	273975	0.08%
05010103	09010200	Broad-Spectrum Penicillins	Drugs Used In Megaloblastic Anaemias	394	1521317	0.03%	211	273975	0.08%
04070401	07020250	Acute Migraine	Preparations For Vaginal And Vulval Candidiasis	342	1521317	0.02%	211	273975	0.08%
04070200	13020102	Opioid Analgesics	Emollient Skin Preparations	287	1521317	0.02%	211	273975	0.08%
04030400	04105100	Other Antidepressants	Substance Dependence - Nicotine Dependence	267	1521317	0.02%	211	273975	0.08%
02120400	06010101	Statins	Short-Acting Insulins	242	1521317	0.02%	211	273975	0.08%
01060200	04060000	Stimulant Laxatives	Products Used Against Nausea And Vertigo	394	1521317	0.03%	210	273975	0.08%
02090000	10010100	Antiplatelet Products	Non-Steroidal Anti-Inflammatory Drugs	336	1521317	0.02%	210	273975	0.08%
01050100	04070100	Aminosalicylates	Non-Opioid And Compound Analgesics	319	1521317	0.02%	210	273975	0.08%
03010101	09060700	Selective Beta 2 Agonists	Multivitamin And Multimineral Preparations	336	1521317	0.02%	209	273975	0.08%
02090000	03040101	Antiplatelet Products	Non-Sedating Antihistamines	333	1521317	0.02%	209	273975	0.08%
01030500	09060700	Proton Pump Inhibitors	Multivitamin And Multimineral Preparations	329	1521317	0.02%	209	273975	0.08%
02110000	04030300	Antifibrinolytic Products And Haemostatics	Selective Serotonin Re-Uptake Inhibitors (SSRI)	296	1521317	0.02%	209	273975	0.08%
01030100	09010101	H2-Receptor Antagonists	Oral Iron	531	1521317	0.03%	208	273975	0.08%
01060400	04020102	Osmotic Laxatives	Second-Generation Antipsychotic Drugs	225	1521317	0.01%	208	273975	0.08%
01030500	06010102	Proton Pump Inhibitors	Intermediate- And Long-Acting Insulins	223	1521317	0.01%	208	273975	0.08%
02090000	05010201	Antiplatelet Products	Cephalosporins	442	1521317	0.03%	207	273975	0.08%
06010102	13040000	Intermediate- And Long-Acting Insulins	Topical Corticosteroids	259	1521317	0.02%	207	273975	0.08%
04070100	13060102	Non-Opioid And Compound Analgesics	Topical Antibacterials For Acne	500	1521317	0.03%	206	273975	0.08%
01020100	04070100	Antimuscarinics	Non-Opioid And Compound Analgesics	406	1521317	0.03%	206	273975	0.08%
01010201	13020101	Compound Alginate Preparations	Emollient Bath Additives And Shower Preparations	384	1521317	0.03%	206	273975	0.08%
04010100	05011300	Hypnotics	Urinary-Tract Infections	357	1521317	0.02%	206	273975	0.08%
02080100	04070100	Parenteral Anticoagulants	Non-Opioid And Compound Analgesics	307	1521317	0.02%	206	273975	0.08%
01030500	11040200	Proton Pump Inhibitors	Other Anti-Inflammatory Eye Preparations (For The Eye)	301	1521317	0.02%	205	273975	0.07%
01040200	03020000	Antimotility Products	Corticosteroids (For Respiratory Conditions)	271	1521317	0.02%	205	273975	0.07%
05010103	09060700	Broad-Spectrum Penicillins	Multivitamin And Multimineral Preparations	515	1521317	0.03%	204	273975	0.07%
04050100	04070100	Anti-Obesity Products Acting On The Gastro-Intestinal Tract	Non-Opioid And Compound Analgesics	323	1521317	0.02%	204	273975	0.07%
02090000	12020101	Antiplatelet Products	Corticosteroids Used In Nasal Allergy	309	1521317	0.02%	204	273975	0.07%
01050200	06020100	Corticosteroids In Chronic Bowel Problems	Thyroid Hormones	265	1521317	0.02%	204	273975	0.07%
02050501	02090000	Angiotensin-Converting Enzyme Inhibitors (ACE Inhibitors)	Antiplatelet Products	258	1521317	0.02%	204	273975	0.07%
06020100	11040200	Thyroid Hormones	Other Anti-Inflammatory Eye Preparations (For The Eye)	253	1521317	0.02%	204	273975	0.07%
05011300	12020101	Urinary-Tract Infections	Corticosteroids Used In Nasal Allergy	374	1521317	0.02%	203	273975	0.07%
04010201	04065500	Benzodiazepines	Products Used Against Nausea And Vertigo - Domperidone & Metoclopramide	279	1521317	0.02%	203	273975	0.07%
04010201	04105100	Benzodiazepines	Substance Dependence - Nicotine Dependence	261	1521317	0.02%	203	273975	0.07%
01030500	02120400	Proton Pump Inhibitors	Statins	230	1521317	0.02%	203	273975	0.07%
03010101	04020000	Selective Beta 2 Agonists	Products Used In Psychoses And Related Disorders	219	1521317	0.01%	203	273975	0.07%
01030500	06010101	Proton Pump Inhibitors	Short-Acting Insulins	219	1521317	0.01%	203	273975	0.07%
03040102	09010101	Sedating Antihistamines	Oral Iron	524	1521317	0.03%	202	273975	0.07%
09060400	13040000	Vitamin D	Topical Corticosteroids	421	1521317	0.03%	202	273975	0.07%
04070200	05010300	Opioid Analgesics	Tetracyclines	272	1521317	0.02%	202	273975	0.07%
03040101	04070401	Non-Sedating Antihistamines	Acute Migraine	270	1521317	0.02%	202	273975	0.07%
06010101	13040000	Short-Acting Insulins	Topical Corticosteroids	251	1521317	0.02%	202	273975	0.07%
01060400	05011100	Osmotic Laxatives	Metronidazole And Tinidazole	551	1521317	0.04%	201	273975	0.07%
04070401	06040103	Acute Migraine	Progestogen Products Doubling (In House Use)	447	1521317	0.03%	201	273975	0.07%
01020000	04030300	Antispasmodics And Products Affecting Motility	Selective Serotonin Re-Uptake Inhibitors (SSRI)	255	1521317	0.02%	201	273975	0.07%
04010201	04030000	Benzodiazepines	Antidepressants	220	1521317	0.01%	201	273975	0.07%
01060400	13020100	Osmotic Laxatives	Emollients	421	1521317	0.03%	200	273975	0.07%
03020000	05010101	Corticosteroids (For Respiratory Conditions)	Benzylpenicillin And Phenoxymethylpenicillin	419	1521317	0.03%	200	273975	0.07%
03010101	13060102	Selective Beta 2 Agonists	Topical Antibacterials For Acne	359	1521317	0.02%	200	273975	0.07%
02040000	12020101	Beta-Adrenoceptor Blockers	Corticosteroids Used In Nasal Allergy	276	1521317	0.02%	200	273975	0.07%
04030400	05010300	Other Antidepressants	Tetracyclines	237	1521317	0.02%	200	273975	0.07%
01050200	03010000	Corticosteroids In Chronic Bowel Problems	Bronchodilators	369	1521317	0.02%	199	273975	0.07%
01030100	13040000	H2-Receptor Antagonists	Topical Corticosteroids	381	1521317	0.03%	198	273975	0.07%
04070401	04070402	Acute Migraine	Prophylaxis Of Migraine	326	1521317	0.02%	198	273975	0.07%
04030100	05010102	Tricyclic And Related Antidepressants	Penicillinase-Resistant Penicillins	297	1521317	0.02%	198	273975	0.07%
01030100	04030400	H2-Receptor Antagonists	Other Antidepressants	214	1521317	0.01%	198	273975	0.07%
03040101	13020103	Non-Sedating Antihistamines	Antimicrobial Emollients	354	1521317	0.02%	197	273975	0.07%
04070100	11080100	Non-Opioid And Compound Analgesics	Tear Deficiency	332	1521317	0.02%	197	273975	0.07%
01020200	12020101	Other Antispasmodics	Corticosteroids Used In Nasal Allergy	267	1521317	0.02%	197	273975	0.07%
01030100	04030100	H2-Receptor Antagonists	Tricyclic And Related Antidepressants	264	1521317	0.02%	197	273975	0.07%
06010202	10010100	Biguanides (Metformin)	Non-Steroidal Anti-Inflammatory Drugs	245	1521317	0.02%	197	273975	0.07%
01040200	05010201	Antimotility Products	Cephalosporins	400	1521317	0.03%	196	273975	0.07%
03040102	10010100	Sedating Antihistamines	Non-Steroidal Anti-Inflammatory Drugs	391	1521317	0.03%	196	273975	0.07%
04070200	05011100	Opioid Analgesics	Metronidazole And Tinidazole	307	1521317	0.02%	196	273975	0.07%
01030100	12020101	H2-Receptor Antagonists	Corticosteroids Used In Nasal Allergy	280	1521317	0.02%	196	273975	0.07%
01030500	04080100	Proton Pump Inhibitors	Control Of Epilepsy	225	1521317	0.01%	196	273975	0.07%
05010101	12030100	Benzylpenicillin And Phenoxymethylpenicillin	Drugs For Oral Ulceration And Inflammation	717	1521317	0.05%	195	273975	0.07%
01060400	01070000	Osmotic Laxatives	Local Products For Anal Or Rectal Problems	706	1521317	0.05%	195	273975	0.07%
13020102	71580200	Emollient Skin Preparations	Emollient Ointment	442	1521317	0.03%	195	273975	0.07%
04060000	04070401	Products Used Against Nausea And Vertigo	Acute Migraine	327	1521317	0.02%	195	273975	0.07%
01040200	03040101	Antimotility Products	Non-Sedating Antihistamines	256	1521317	0.02%	195	273975	0.07%
05020100	06040103	Triazole Antifungals	Progestogen Products Doubling (In House Use)	669	1521317	0.04%	194	273975	0.07%
05011100	09010101	Metronidazole And Tinidazole	Oral Iron	656	1521317	0.04%	194	273975	0.07%
04065500	05011300	Products Used Against Nausea And Vertigo - Domperidone & Metoclopramide	Urinary-Tract Infections	465	1521317	0.03%	194	273975	0.07%
13040000	13040200	Topical Corticosteroids	Mild Topical Corticosteroids	464	1521317	0.03%	194	273975	0.07%
01030100	02040000	H2-Receptor Antagonists	Beta-Adrenoceptor Blockers	257	1521317	0.02%	194	273975	0.07%
03010101	04030000	Selective Beta 2 Agonists	Antidepressants	213	1521317	0.01%	194	273975	0.07%
02050200	02060200	Centrally Acting Antihypertensive Products	Calcium-Channel Blockers	321	1521317	0.02%	193	273975	0.07%
04010100	05010102	Hypnotics	Penicillinase-Resistant Penicillins	318	1521317	0.02%	193	273975	0.07%
04010201	05010800	Benzodiazepines	Sulphonamides And Trimethoprim	293	1521317	0.02%	193	273975	0.07%
03040102	06020100	Sedating Antihistamines	Thyroid Hormones	266	1521317	0.02%	193	273975	0.07%
05010102	13020101	Penicillinase-Resistant Penicillins	Emollient Bath Additives And Shower Preparations	390	1521317	0.03%	192	273975	0.07%
04065500	12020101	Products Used Against Nausea And Vertigo - Domperidone & Metoclopramide	Corticosteroids Used In Nasal Allergy	345	1521317	0.02%	192	273975	0.07%
01030500	13020101	Proton Pump Inhibitors	Emollient Bath Additives And Shower Preparations	262	1521317	0.02%	192	273975	0.07%
01020200	04010100	Other Antispasmodics	Hypnotics	260	1521317	0.02%	192	273975	0.07%
06040102	07020250	Progestogens And Progesterone Receptor Modulators	Preparations For Vaginal And Vulval Candidiasis	489	1521317	0.03%	191	273975	0.07%
01050200	02080100	Corticosteroids In Chronic Bowel Problems	Parenteral Anticoagulants	396	1521317	0.03%	191	273975	0.07%
05010800	12020101	Sulphonamides And Trimethoprim	Corticosteroids Used In Nasal Allergy	370	1521317	0.02%	191	273975	0.07%
02020100	02040000	Thiazides And Related Diuretics	Beta-Adrenoceptor Blockers	320	1521317	0.02%	191	273975	0.07%
03040101	09060400	Non-Sedating Antihistamines	Vitamin D	288	1521317	0.02%	191	273975	0.07%
02050200	02050501	Centrally Acting Antihypertensive Products	Angiotensin-Converting Enzyme Inhibitors (ACE Inhibitors)	269	1521317	0.02%	191	273975	0.07%
04030400	04070300	Other Antidepressants	Neuropathic Pain	210	1521317	0.01%	191	273975	0.07%
04070100	05011200	Non-Opioid And Compound Analgesics	Quinolones	432	1521317	0.03%	190	273975	0.07%
05011300	10010100	Urinary-Tract Infections	Non-Steroidal Anti-Inflammatory Drugs	429	1521317	0.03%	190	273975	0.07%
12010151	13040000	Anti-Inflammatory Preparations	Topical Corticosteroids	416	1521317	0.03%	190	273975	0.07%
04070100	13100300	Non-Opioid And Compound Analgesics	Antiviral Preparations (Topical	393	1521317	0.03%	190	273975	0.07%
01040200	04065500	Antimotility Products	Products Used Against Nausea And Vertigo - Domperidone & Metoclopramide	363	1521317	0.02%	190	273975	0.07%
02060200	03010101	Calcium-Channel Blockers	Selective Beta 2 Agonists	213	1521317	0.01%	190	273975	0.07%
04010201	04080100	Benzodiazepines	Control Of Epilepsy	210	1521317	0.01%	190	273975	0.07%
04020100	04070100	Antipsychotic Products	Non-Opioid And Compound Analgesics	483	1521317	0.03%	189	273975	0.07%
02090000	05011300	Antiplatelet Products	Urinary-Tract Infections	426	1521317	0.03%	189	273975	0.07%
01020000	01030500	Antispasmodics And Products Affecting Motility	Proton Pump Inhibitors	315	1521317	0.02%	189	273975	0.07%
01050200	04060000	Corticosteroids In Chronic Bowel Problems	Products Used Against Nausea And Vertigo	294	1521317	0.02%	189	273975	0.07%
06010201	06010202	Sulphonylureas	Biguanides (Metformin)	254	1521317	0.02%	189	273975	0.07%
02080100	04030300	Parenteral Anticoagulants	Selective Serotonin Re-Uptake Inhibitors (SSRI)	223	1521317	0.01%	189	273975	0.07%
02090000	04030400	Antiplatelet Products	Other Antidepressants	220	1521317	0.01%	189	273975	0.07%
01030500	02060200	Proton Pump Inhibitors	Calcium-Channel Blockers	217	1521317	0.01%	189	273975	0.07%
04105100	10010100	Substance Dependence - Nicotine Dependence	Non-Steroidal Anti-Inflammatory Drugs	468	1521317	0.03%	188	273975	0.07%
05010101	06020100	Benzylpenicillin And Phenoxymethylpenicillin	Thyroid Hormones	307	1521317	0.02%	188	273975	0.07%
01030500	10030250	Proton Pump Inhibitors	Topical Nsaids And Counter Irritants	299	1521317	0.02%	188	273975	0.07%
04010100	04080100	Hypnotics	Control Of Epilepsy	208	1521317	0.01%	188	273975	0.07%
06040103	11040200	Progestogen Products Doubling (In House Use)	Other Anti-Inflammatory Eye Preparations (For The Eye)	534	1521317	0.04%	187	273975	0.07%
01060400	05010101	Osmotic Laxatives	Benzylpenicillin And Phenoxymethylpenicillin	511	1521317	0.03%	187	273975	0.07%
05010102	12020101	Penicillinase-Resistant Penicillins	Corticosteroids Used In Nasal Allergy	343	1521317	0.02%	187	273975	0.07%
01050200	01060400	Corticosteroids In Chronic Bowel Problems	Osmotic Laxatives	305	1521317	0.02%	187	273975	0.07%
01050200	04030100	Corticosteroids In Chronic Bowel Problems	Tricyclic And Related Antidepressants	227	1521317	0.01%	187	273975	0.07%
06040103	13020100	Progestogen Products Doubling (In House Use)	Emollients	586	1521317	0.04%	186	273975	0.07%
04030300	07040250	Selective Serotonin Re-Uptake Inhibitors (SSRI)	Urinary Incontinence	236	1521317	0.02%	186	273975	0.07%
09010101	11040200	Oral Iron	Other Anti-Inflammatory Eye Preparations (For The Eye)	438	1521317	0.03%	185	273975	0.07%
01060400	09060400	Osmotic Laxatives	Vitamin D	393	1521317	0.03%	185	273975	0.07%
01020200	05010201	Other Antispasmodics	Cephalosporins	374	1521317	0.02%	185	273975	0.07%
04030300	13100400	Selective Serotonin Re-Uptake Inhibitors (SSRI)	Parasiticidal Preparations (Topical)	285	1521317	0.02%	185	273975	0.07%
04030100	04105100	Tricyclic And Related Antidepressants	Substance Dependence - Nicotine Dependence	266	1521317	0.02%	185	273975	0.07%
04010201	13020102	Benzodiazepines	Emollient Skin Preparations	228	1521317	0.01%	185	273975	0.07%
01060200	10010100	Stimulant Laxatives	Non-Steroidal Anti-Inflammatory Drugs	354	1521317	0.02%	184	273975	0.07%
03010000	07020250	Bronchodilators	Preparations For Vaginal And Vulval Candidiasis	331	1521317	0.02%	184	273975	0.07%
03040101	04020102	Non-Sedating Antihistamines	Second-Generation Antipsychotic Drugs	189	1521317	0.01%	184	273975	0.07%
03040101	04065500	Non-Sedating Antihistamines	Products Used Against Nausea And Vertigo - Domperidone & Metoclopramide	334	1521317	0.02%	183	273975	0.07%
03010101	71580200	Selective Beta 2 Agonists	Emollient Ointment	245	1521317	0.02%	183	273975	0.07%
01020200	02040000	Other Antispasmodics	Beta-Adrenoceptor Blockers	222	1521317	0.01%	183	273975	0.07%
03040102	04030400	Sedating Antihistamines	Other Antidepressants	215	1521317	0.01%	183	273975	0.07%
04020101	05010500	First-Generation Antipsychotic Drugs	Macrolides	459	1521317	0.03%	182	273975	0.07%
01060400	11040200	Osmotic Laxatives	Other Anti-Inflammatory Eye Preparations (For The Eye)	359	1521317	0.02%	182	273975	0.07%
02090000	13020102	Antiplatelet Products	Emollient Skin Preparations	346	1521317	0.02%	182	273975	0.07%
03040102	04070200	Sedating Antihistamines	Opioid Analgesics	250	1521317	0.02%	182	273975	0.07%
02050200	04070100	Centrally Acting Antihypertensive Products	Non-Opioid And Compound Analgesics	235	1521317	0.02%	182	273975	0.07%
02060200	02090000	Calcium-Channel Blockers	Antiplatelet Products	231	1521317	0.02%	182	273975	0.07%
01060100	09010101	Bulk-Forming Laxatives	Oral Iron	535	1521317	0.04%	181	273975	0.07%
05010500	05010800	Macrolides	Sulphonamides And Trimethoprim	469	1521317	0.03%	181	273975	0.07%
01050200	03040102	Corticosteroids In Chronic Bowel Problems	Sedating Antihistamines	317	1521317	0.02%	181	273975	0.07%
04070401	13040000	Acute Migraine	Topical Corticosteroids	307	1521317	0.02%	181	273975	0.07%
01020200	01040200	Other Antispasmodics	Antimotility Products	287	1521317	0.02%	181	273975	0.07%
02040000	04065500	Beta-Adrenoceptor Blockers	Products Used Against Nausea And Vertigo - Domperidone & Metoclopramide	286	1521317	0.02%	181	273975	0.07%
04030300	13090100	Selective Serotonin Re-Uptake Inhibitors (SSRI)	Shampoos And Other Scalp Preparations	219	1521317	0.01%	181	273975	0.07%
01070200	06040103	Compound Haemorrhoid Products With Corticosteroids	Progestogen Products Doubling (In House Use)	864	1521317	0.06%	180	273975	0.07%
01020200	09010101	Other Antispasmodics	Oral Iron	323	1521317	0.02%	180	273975	0.07%
02040000	05011300	Beta-Adrenoceptor Blockers	Urinary-Tract Infections	272	1521317	0.02%	180	273975	0.07%
04010201	05010102	Benzodiazepines	Penicillinase-Resistant Penicillins	228	1521317	0.01%	180	273975	0.07%
01020200	06020100	Other Antispasmodics	Thyroid Hormones	218	1521317	0.01%	180	273975	0.07%
10010100	10030250	Non-Steroidal Anti-Inflammatory Drugs	Topical Nsaids And Counter Irritants	432	1521317	0.03%	179	273975	0.07%
03020000	03030200	Corticosteroids (For Respiratory Conditions)	Leukotriene Receptor Antagonists	254	1521317	0.02%	179	273975	0.07%
03020000	09060400	Corticosteroids (For Respiratory Conditions)	Vitamin D	221	1521317	0.01%	179	273975	0.07%
03040102	05010201	Sedating Antihistamines	Cephalosporins	390	1521317	0.03%	178	273975	0.06%
04030300	13040200	Selective Serotonin Re-Uptake Inhibitors (SSRI)	Mild Topical Corticosteroids	260	1521317	0.02%	178	273975	0.06%
04010100	05010300	Hypnotics	Tetracyclines	251	1521317	0.02%	178	273975	0.06%
06020100	13020100	Thyroid Hormones	Emollients	251	1521317	0.02%	178	273975	0.06%
03010101	13090100	Selective Beta 2 Agonists	Shampoos And Other Scalp Preparations	228	1521317	0.01%	178	273975	0.06%
01030500	02050501	Proton Pump Inhibitors	Angiotensin-Converting Enzyme Inhibitors (ACE Inhibitors)	210	1521317	0.01%	178	273975	0.06%
04030400	04080100	Other Antidepressants	Control Of Epilepsy	189	1521317	0.01%	178	273975	0.06%
05010102	05010500	Penicillinase-Resistant Penicillins	Macrolides	524	1521317	0.03%	177	273975	0.06%
04020101	05010800	First-Generation Antipsychotic Drugs	Sulphonamides And Trimethoprim	462	1521317	0.03%	177	273975	0.06%
01010201	04070401	Compound Alginate Preparations	Acute Migraine	270	1521317	0.02%	177	273975	0.06%
01030100	01050200	H2-Receptor Antagonists	Corticosteroids In Chronic Bowel Problems	258	1521317	0.02%	177	273975	0.06%
02050501	06010102	Angiotensin-Converting Enzyme Inhibitors (ACE Inhibitors)	Intermediate- And Long-Acting Insulins	202	1521317	0.01%	177	273975	0.06%
03010101	04070402	Selective Beta 2 Agonists	Prophylaxis Of Migraine	199	1521317	0.01%	177	273975	0.06%
04020102	13040000	Second-Generation Antipsychotic Drugs	Topical Corticosteroids	190	1521317	0.01%	177	273975	0.06%
01030100	04065400	H2-Receptor Antagonists	Products Used Against Nausea And Vertigo - Antihistamines	502	1521317	0.03%	176	273975	0.06%
13020102	13090100	Emollient Skin Preparations	Shampoos And Other Scalp Preparations	356	1521317	0.02%	176	273975	0.06%
01020200	04065500	Other Antispasmodics	Products Used Against Nausea And Vertigo - Domperidone & Metoclopramide	296	1521317	0.02%	176	273975	0.06%
02080100	06020100	Parenteral Anticoagulants	Thyroid Hormones	239	1521317	0.02%	176	273975	0.06%
05010101	05010201	Benzylpenicillin And Phenoxymethylpenicillin	Cephalosporins	560	1521317	0.04%	175	273975	0.06%
01030100	02090000	H2-Receptor Antagonists	Antiplatelet Products	295	1521317	0.02%	175	273975	0.06%
04070200	05011300	Opioid Analgesics	Urinary-Tract Infections	295	1521317	0.02%	175	273975	0.06%
01030500	13020100	Proton Pump Inhibitors	Emollients	269	1521317	0.02%	175	273975	0.06%
04070401	06020100	Acute Migraine	Thyroid Hormones	203	1521317	0.01%	175	273975	0.06%
04010100	04030000	Hypnotics	Antidepressants	189	1521317	0.01%	175	273975	0.06%
05010103	13060102	Broad-Spectrum Penicillins	Topical Antibacterials For Acne	519	1521317	0.03%	174	273975	0.06%
03020000	05011300	Corticosteroids (For Respiratory Conditions)	Urinary-Tract Infections	301	1521317	0.02%	174	273975	0.06%
03010101	13100300	Selective Beta 2 Agonists	Antiviral Preparations (Topical	258	1521317	0.02%	174	273975	0.06%
04030300	11080100	Selective Serotonin Re-Uptake Inhibitors (SSRI)	Tear Deficiency	212	1521317	0.01%	174	273975	0.06%
01030500	04065600	Proton Pump Inhibitors	Products Used Against Nausea And Vertigo - 5 HT3 Antagonists	324	1521317	0.02%	173	273975	0.06%
04070100	13020103	Non-Opioid And Compound Analgesics	Antimicrobial Emollients	297	1521317	0.02%	173	273975	0.06%
01060400	04070401	Osmotic Laxatives	Acute Migraine	248	1521317	0.02%	173	273975	0.06%
04030100	05010300	Tricyclic And Related Antidepressants	Tetracyclines	224	1521317	0.01%	173	273975	0.06%
04070200	04080100	Opioid Analgesics	Control Of Epilepsy	195	1521317	0.01%	173	273975	0.06%
04105100	05010201	Substance Dependence - Nicotine Dependence	Cephalosporins	531	1521317	0.03%	172	273975	0.06%
01030100	10010100	H2-Receptor Antagonists	Non-Steroidal Anti-Inflammatory Drugs	336	1521317	0.02%	172	273975	0.06%
03010101	12030100	Selective Beta 2 Agonists	Drugs For Oral Ulceration And Inflammation	297	1521317	0.02%	172	273975	0.06%
01060200	13040000	Stimulant Laxatives	Topical Corticosteroids	297	1521317	0.02%	172	273975	0.06%
04030300	05011200	Selective Serotonin Re-Uptake Inhibitors (SSRI)	Quinolones	252	1521317	0.02%	172	273975	0.06%
02080100	03010101	Parenteral Anticoagulants	Selective Beta 2 Agonists	229	1521317	0.02%	172	273975	0.06%
01030100	06020100	H2-Receptor Antagonists	Thyroid Hormones	225	1521317	0.01%	172	273975	0.06%
01020200	03020000	Other Antispasmodics	Corticosteroids (For Respiratory Conditions)	222	1521317	0.01%	172	273975	0.06%
02050501	03010101	Angiotensin-Converting Enzyme Inhibitors (ACE Inhibitors)	Selective Beta 2 Agonists	188	1521317	0.01%	172	273975	0.06%
03010000	06040103	Bronchodilators	Progestogen Products Doubling (In House Use)	363	1521317	0.02%	171	273975	0.06%
01030100	05010201	H2-Receptor Antagonists	Cephalosporins	361	1521317	0.02%	171	273975	0.06%
01020100	04030300	Antimuscarinics	Selective Serotonin Re-Uptake Inhibitors (SSRI)	232	1521317	0.02%	171	273975	0.06%
04020300	04030300	Products Used For Mania And Hypomania	Selective Serotonin Re-Uptake Inhibitors (SSRI)	187	1521317	0.01%	171	273975	0.06%
01010201	04020102	Compound Alginate Preparations	Second-Generation Antipsychotic Drugs	184	1521317	0.01%	171	273975	0.06%
02090000	04020101	Antiplatelet Products	First-Generation Antipsychotic Drugs	425	1521317	0.03%	170	273975	0.06%
05010101	12020101	Benzylpenicillin And Phenoxymethylpenicillin	Corticosteroids Used In Nasal Allergy	363	1521317	0.02%	170	273975	0.06%
03040101	04105100	Non-Sedating Antihistamines	Substance Dependence - Nicotine Dependence	302	1521317	0.02%	170	273975	0.06%
01030100	04010100	H2-Receptor Antagonists	Hypnotics	268	1521317	0.02%	170	273975	0.06%
02020100	02050501	Thiazides And Related Diuretics	Angiotensin-Converting Enzyme Inhibitors (ACE Inhibitors)	228	1521317	0.01%	170	273975	0.06%
04010100	04070401	Hypnotics	Acute Migraine	218	1521317	0.01%	170	273975	0.06%
03040102	04010201	Sedating Antihistamines	Benzodiazepines	209	1521317	0.01%	170	273975	0.06%
01040200	06020100	Antimotility Products	Thyroid Hormones	206	1521317	0.01%	170	273975	0.06%
02040000	06010102	Beta-Adrenoceptor Blockers	Intermediate- And Long-Acting Insulins	182	1521317	0.01%	170	273975	0.06%
07020250	13060102	Preparations For Vaginal And Vulval Candidiasis	Topical Antibacterials For Acne	512	1521317	0.03%	169	273975	0.06%
02110000	04070100	Antifibrinolytic Products And Haemostatics	Non-Opioid And Compound Analgesics	364	1521317	0.02%	169	273975	0.06%
01010201	06040102	Compound Alginate Preparations	Progestogens And Progesterone Receptor Modulators	356	1521317	0.02%	169	273975	0.06%
03040102	04030100	Sedating Antihistamines	Tricyclic And Related Antidepressants	225	1521317	0.01%	169	273975	0.06%
04020101	13020102	First-Generation Antipsychotic Drugs	Emollient Skin Preparations	357	1521317	0.02%	168	273975	0.06%
04065500	05010500	Products Used Against Nausea And Vertigo - Domperidone & Metoclopramide	Macrolides	355	1521317	0.02%	168	273975	0.06%
06010102	06040103	Intermediate- And Long-Acting Insulins	Progestogen Products Doubling (In House Use)	246	1521317	0.02%	168	273975	0.06%
03040101	06010102	Non-Sedating Antihistamines	Intermediate- And Long-Acting Insulins	202	1521317	0.01%	168	273975	0.06%
02050501	05010103	Angiotensin-Converting Enzyme Inhibitors (ACE Inhibitors)	Broad-Spectrum Penicillins	197	1521317	0.01%	168	273975	0.06%
05010102	05010201	Penicillinase-Resistant Penicillins	Cephalosporins	495	1521317	0.03%	167	273975	0.06%
03040102	06040103	Sedating Antihistamines	Progestogen Products Doubling (In House Use)	482	1521317	0.03%	167	273975	0.06%
03040101	05010101	Non-Sedating Antihistamines	Benzylpenicillin And Phenoxymethylpenicillin	414	1521317	0.03%	167	273975	0.06%
05010103	13100300	Broad-Spectrum Penicillins	Antiviral Preparations (Topical	410	1521317	0.03%	167	273975	0.06%
04065600	05010103	Products Used Against Nausea And Vertigo - 5 HT3 Antagonists	Broad-Spectrum Penicillins	374	1521317	0.02%	167	273975	0.06%
01040200	04020101	Antimotility Products	First-Generation Antipsychotic Drugs	330	1521317	0.02%	167	273975	0.06%
01050100	09010101	Aminosalicylates	Oral Iron	308	1521317	0.02%	167	273975	0.06%
01030500	05020100	Proton Pump Inhibitors	Triazole Antifungals	260	1521317	0.02%	167	273975	0.06%
01060100	06020100	Bulk-Forming Laxatives	Thyroid Hormones	238	1521317	0.02%	167	273975	0.06%
01030500	01050300	Proton Pump Inhibitors	Products Affecting The Immune Response In Chronic Bowel Problems	226	1521317	0.01%	167	273975	0.06%
05010201	06010102	Cephalosporins	Intermediate- And Long-Acting Insulins	211	1521317	0.01%	167	273975	0.06%
01050100	04030300	Aminosalicylates	Selective Serotonin Re-Uptake Inhibitors (SSRI)	181	1521317	0.01%	167	273975	0.06%
01040200	04065400	Antimotility Products	Products Used Against Nausea And Vertigo - Antihistamines	353	1521317	0.02%	166	273975	0.06%
03010000	13020102	Bronchodilators	Emollient Skin Preparations	233	1521317	0.02%	166	273975	0.06%
01060200	04030400	Stimulant Laxatives	Other Antidepressants	190	1521317	0.01%	166	273975	0.06%
05010103	10030250	Broad-Spectrum Penicillins	Topical Nsaids And Counter Irritants	374	1521317	0.02%	165	273975	0.06%
04070100	13090100	Non-Opioid And Compound Analgesics	Shampoos And Other Scalp Preparations	292	1521317	0.02%	165	273975	0.06%
03020000	05010300	Corticosteroids (For Respiratory Conditions)	Tetracyclines	276	1521317	0.02%	165	273975	0.06%
01070200	09010101	Compound Haemorrhoid Products With Corticosteroids	Oral Iron	577	1521317	0.04%	164	273975	0.06%
01060400	06040102	Osmotic Laxatives	Progestogens And Progesterone Receptor Modulators	368	1521317	0.02%	164	273975	0.06%
05010102	13020100	Penicillinase-Resistant Penicillins	Emollients	367	1521317	0.02%	164	273975	0.06%
01030500	06040102	Proton Pump Inhibitors	Progestogens And Progesterone Receptor Modulators	279	1521317	0.02%	164	273975	0.06%
01040200	12020101	Antimotility Products	Corticosteroids Used In Nasal Allergy	245	1521317	0.02%	164	273975	0.06%
04030300	13100200	Selective Serotonin Re-Uptake Inhibitors (SSRI)	Antifungal Preparations (Topical	240	1521317	0.02%	164	273975	0.06%
04070300	10010100	Neuropathic Pain	Non-Steroidal Anti-Inflammatory Drugs	230	1521317	0.02%	164	273975	0.06%
06010202	12020101	Biguanides (Metformin)	Corticosteroids Used In Nasal Allergy	197	1521317	0.01%	164	273975	0.06%
01060100	01070200	Bulk-Forming Laxatives	Compound Haemorrhoid Products With Corticosteroids	518	1521317	0.03%	163	273975	0.06%
05011100	05011200	Metronidazole And Tinidazole	Quinolones	498	1521317	0.03%	163	273975	0.06%
05010103	05011200	Broad-Spectrum Penicillins	Quinolones	416	1521317	0.03%	163	273975	0.06%
05010103	13090000	Broad-Spectrum Penicillins	Shampoos And Other Preparations For Scalp And Hair Conditions	356	1521317	0.02%	163	273975	0.06%
02040000	06010101	Beta-Adrenoceptor Blockers	Short-Acting Insulins	179	1521317	0.01%	163	273975	0.06%
06010400	06020100	Treatment Of Hypoglycaemia	Thyroid Hormones	171	1521317	0.01%	163	273975	0.06%
02120400	03010101	Statins	Selective Beta 2 Agonists	169	1521317	0.01%	163	273975	0.06%
03020000	04020102	Corticosteroids (For Respiratory Conditions)	Second-Generation Antipsychotic Drugs	168	1521317	0.01%	163	273975	0.06%
13040000	13100200	Topical Corticosteroids	Antifungal Preparations (Topical	500	1521317	0.03%	162	273975	0.06%
13020101	71580200	Emollient Bath Additives And Shower Preparations	Emollient Ointment	323	1521317	0.02%	162	273975	0.06%
13020102	13050200	Emollient Skin Preparations	Preparations For Psoriasis	312	1521317	0.02%	162	273975	0.06%
01060100	12020101	Bulk-Forming Laxatives	Corticosteroids Used In Nasal Allergy	270	1521317	0.02%	162	273975	0.06%
09060400	12020101	Vitamin D	Corticosteroids Used In Nasal Allergy	259	1521317	0.02%	162	273975	0.06%
02020100	02060200	Thiazides And Related Diuretics	Calcium-Channel Blockers	236	1521317	0.02%	162	273975	0.06%
01010201	06010102	Compound Alginate Preparations	Intermediate- And Long-Acting Insulins	207	1521317	0.01%	162	273975	0.06%
01010201	06010101	Compound Alginate Preparations	Short-Acting Insulins	206	1521317	0.01%	162	273975	0.06%
02050501	06010101	Angiotensin-Converting Enzyme Inhibitors (ACE Inhibitors)	Short-Acting Insulins	182	1521317	0.01%	162	273975	0.06%
04060000	09020100	Products Used Against Nausea And Vertigo	Oral Preparations For Fluid And Electrolyte Imbalance	576	1521317	0.04%	161	273975	0.06%
10010100	13020100	Non-Steroidal Anti-Inflammatory Drugs	Emollients	359	1521317	0.02%	161	273975	0.06%
01060400	13020101	Osmotic Laxatives	Emollient Bath Additives And Shower Preparations	315	1521317	0.02%	161	273975	0.06%
06010101	06040103	Short-Acting Insulins	Progestogen Products Doubling (In House Use)	234	1521317	0.02%	161	273975	0.06%
01060400	06010202	Osmotic Laxatives	Biguanides (Metformin)	219	1521317	0.01%	161	273975	0.06%
01050300	04070100	Products Affecting The Immune Response In Chronic Bowel Problems	Non-Opioid And Compound Analgesics	209	1521317	0.01%	161	273975	0.06%
04010201	04070300	Benzodiazepines	Neuropathic Pain	189	1521317	0.01%	161	273975	0.06%
01050200	04010201	Corticosteroids In Chronic Bowel Problems	Benzodiazepines	180	1521317	0.01%	161	273975	0.06%
01050200	04030400	Corticosteroids In Chronic Bowel Problems	Other Antidepressants	178	1521317	0.01%	161	273975	0.06%
01030500	01050100	Proton Pump Inhibitors	Aminosalicylates	224	1521317	0.01%	160	273975	0.06%
04010201	05011300	Benzodiazepines	Urinary-Tract Infections	215	1521317	0.01%	160	273975	0.06%
04070200	09060400	Opioid Analgesics	Vitamin D	197	1521317	0.01%	160	273975	0.06%
09010101	09060700	Oral Iron	Multivitamin And Multimineral Preparations	467	1521317	0.03%	159	273975	0.06%
03040102	04020101	Sedating Antihistamines	First-Generation Antipsychotic Drugs	442	1521317	0.03%	159	273975	0.06%
05010500	05011300	Macrolides	Urinary-Tract Infections	398	1521317	0.03%	159	273975	0.06%
01030100	03020000	H2-Receptor Antagonists	Corticosteroids (For Respiratory Conditions)	245	1521317	0.02%	159	273975	0.06%
04080100	10010100	Control Of Epilepsy	Non-Steroidal Anti-Inflammatory Drugs	225	1521317	0.01%	159	273975	0.06%
03030200	13040000	Leukotriene Receptor Antagonists	Topical Corticosteroids	189	1521317	0.01%	159	273975	0.06%
02040000	02120400	Beta-Adrenoceptor Blockers	Statins	186	1521317	0.01%	159	273975	0.06%
04020102	09010101	Second-Generation Antipsychotic Drugs	Oral Iron	183	1521317	0.01%	159	273975	0.06%
04020102	10010100	Second-Generation Antipsychotic Drugs	Non-Steroidal Anti-Inflammatory Drugs	171	1521317	0.01%	159	273975	0.06%
05010101	05010500	Benzylpenicillin And Phenoxymethylpenicillin	Macrolides	545	1521317	0.04%	158	273975	0.06%
05010102	05011100	Penicillinase-Resistant Penicillins	Metronidazole And Tinidazole	508	1521317	0.03%	158	273975	0.06%
04065400	05010500	Products Used Against Nausea And Vertigo - Antihistamines	Macrolides	392	1521317	0.03%	158	273975	0.06%
02080100	05010103	Parenteral Anticoagulants	Broad-Spectrum Penicillins	285	1521317	0.02%	158	273975	0.06%
04010100	05011100	Hypnotics	Metronidazole And Tinidazole	268	1521317	0.02%	158	273975	0.06%
02040000	05010800	Beta-Adrenoceptor Blockers	Sulphonamides And Trimethoprim	259	1521317	0.02%	158	273975	0.06%
02040000	04065400	Beta-Adrenoceptor Blockers	Products Used Against Nausea And Vertigo - Antihistamines	258	1521317	0.02%	158	273975	0.06%
01060200	04010100	Stimulant Laxatives	Hypnotics	237	1521317	0.02%	158	273975	0.06%
04030400	05011100	Other Antidepressants	Metronidazole And Tinidazole	195	1521317	0.01%	158	273975	0.06%
04030100	09060400	Tricyclic And Related Antidepressants	Vitamin D	195	1521317	0.01%	158	273975	0.06%
04010201	04070401	Benzodiazepines	Acute Migraine	190	1521317	0.01%	158	273975	0.06%
02050501	06020100	Angiotensin-Converting Enzyme Inhibitors (ACE Inhibitors)	Thyroid Hormones	163	1521317	0.01%	158	273975	0.06%
01010201	05011100	Compound Alginate Preparations	Metronidazole And Tinidazole	429	1521317	0.03%	157	273975	0.06%
13040000	71580100	Topical Corticosteroids	Emollient Cream	371	1521317	0.02%	157	273975	0.06%
01060200	09010101	Stimulant Laxatives	Oral Iron	363	1521317	0.02%	157	273975	0.06%
04060000	09060700	Products Used Against Nausea And Vertigo	Multivitamin And Multimineral Preparations	417	1521317	0.03%	156	273975	0.06%
01030500	01070200	Proton Pump Inhibitors	Compound Haemorrhoid Products With Corticosteroids	279	1521317	0.02%	156	273975	0.06%
04070100	07040250	Non-Opioid And Compound Analgesics	Urinary Incontinence	206	1521317	0.01%	156	273975	0.06%
06010102	10010100	Intermediate- And Long-Acting Insulins	Non-Steroidal Anti-Inflammatory Drugs	200	1521317	0.01%	156	273975	0.06%
01050200	04010100	Corticosteroids In Chronic Bowel Problems	Hypnotics	196	1521317	0.01%	156	273975	0.06%
01060100	05010201	Bulk-Forming Laxatives	Cephalosporins	405	1521317	0.03%	155	273975	0.06%
04010100	13020100	Hypnotics	Emollients	211	1521317	0.01%	155	273975	0.06%
05010201	06010101	Cephalosporins	Short-Acting Insulins	201	1521317	0.01%	155	273975	0.06%
05010103	13020103	Broad-Spectrum Penicillins	Antimicrobial Emollients	326	1521317	0.02%	154	273975	0.06%
04020000	05010103	Products Used In Psychoses And Related Disorders	Broad-Spectrum Penicillins	215	1521317	0.01%	154	273975	0.06%
01020200	04010201	Other Antispasmodics	Benzodiazepines	196	1521317	0.01%	154	273975	0.06%
04020102	04030000	Second-Generation Antipsychotic Drugs	Antidepressants	161	1521317	0.01%	154	273975	0.06%
04065600	04070100	Products Used Against Nausea And Vertigo - 5 HT3 Antagonists	Non-Opioid And Compound Analgesics	291	1521317	0.02%	153	273975	0.06%
13040000	13050202	Topical Corticosteroids	Topical Preparations For Psoriasis	280	1521317	0.02%	153	273975	0.06%
04070200	10030250	Opioid Analgesics	Topical Nsaids And Counter Irritants	215	1521317	0.01%	153	273975	0.06%
03020000	06010202	Corticosteroids (For Respiratory Conditions)	Biguanides (Metformin)	175	1521317	0.01%	153	273975	0.06%
05010201	05020100	Cephalosporins	Triazole Antifungals	364	1521317	0.02%	152	273975	0.06%
03040101	11030100	Non-Sedating Antihistamines	Antibacterials (In Eye Preparation)	351	1521317	0.02%	152	273975	0.06%
04070100	09050101	Non-Opioid And Compound Analgesics	Calcium Supplements	271	1521317	0.02%	152	273975	0.06%
04030000	04060000	Antidepressants	Products Used Against Nausea And Vertigo	182	1521317	0.01%	152	273975	0.06%
06040103	13020101	Progestogen Products Doubling (In House Use)	Emollient Bath Additives And Shower Preparations	394	1521317	0.03%	151	273975	0.06%
13040000	13040100	Topical Corticosteroids	Topical Corticosteroids With Antimicrobials	367	1521317	0.02%	151	273975	0.06%
04065400	13020102	Products Used Against Nausea And Vertigo - Antihistamines	Emollient Skin Preparations	342	1521317	0.02%	151	273975	0.06%
04070401	12020101	Acute Migraine	Corticosteroids Used In Nasal Allergy	208	1521317	0.01%	151	273975	0.06%
04070300	05010103	Neuropathic Pain	Broad-Spectrum Penicillins	194	1521317	0.01%	151	273975	0.06%
03010101	09050101	Selective Beta 2 Agonists	Calcium Supplements	185	1521317	0.01%	151	273975	0.06%
04030400	04070401	Other Antidepressants	Acute Migraine	163	1521317	0.01%	151	273975	0.06%
04020100	04020101	Antipsychotic Products	First-Generation Antipsychotic Drugs	520	1521317	0.03%	150	273975	0.05%
04060000	05010101	Products Used Against Nausea And Vertigo	Benzylpenicillin And Phenoxymethylpenicillin	444	1521317	0.03%	150	273975	0.05%
13040000	13060102	Topical Corticosteroids	Topical Antibacterials For Acne	417	1521317	0.03%	150	273975	0.05%
05010500	13100101	Macrolides	Antibacterial Preparations Only Used Topically	361	1521317	0.02%	150	273975	0.05%
06010202	13020102	Biguanides (Metformin)	Emollient Skin Preparations	184	1521317	0.01%	150	273975	0.05%
04030100	06010202	Tricyclic And Related Antidepressants	Biguanides (Metformin)	167	1521317	0.01%	150	273975	0.05%
04020102	04080100	Second-Generation Antipsychotic Drugs	Control Of Epilepsy	165	1521317	0.01%	150	273975	0.05%
03040102	04065500	Sedating Antihistamines	Products Used Against Nausea And Vertigo - Domperidone & Metoclopramide	414	1521317	0.03%	149	273975	0.05%
01060200	03040101	Stimulant Laxatives	Non-Sedating Antihistamines	218	1521317	0.01%	149	273975	0.05%
01030100	04010201	H2-Receptor Antagonists	Benzodiazepines	186	1521317	0.01%	149	273975	0.05%
02050200	03010101	Centrally Acting Antihypertensive Products	Selective Beta 2 Agonists	184	1521317	0.01%	149	273975	0.05%
03040101	06010101	Non-Sedating Antihistamines	Short-Acting Insulins	179	1521317	0.01%	149	273975	0.05%
01030500	04070402	Proton Pump Inhibitors	Prophylaxis Of Migraine	163	1521317	0.01%	149	273975	0.05%
07020250	13100200	Preparations For Vaginal And Vulval Candidiasis	Antifungal Preparations (Topical	454	1521317	0.03%	148	273975	0.05%
01010201	13100101	Compound Alginate Preparations	Antibacterial Preparations Only Used Topically	359	1521317	0.02%	148	273975	0.05%
03040102	05010102	Sedating Antihistamines	Penicillinase-Resistant Penicillins	357	1521317	0.02%	148	273975	0.05%
03040102	05010500	Sedating Antihistamines	Macrolides	303	1521317	0.02%	148	273975	0.05%
02040000	05010500	Beta-Adrenoceptor Blockers	Macrolides	261	1521317	0.02%	148	273975	0.05%
01040200	05010500	Antimotility Products	Macrolides	257	1521317	0.02%	148	273975	0.05%
02040000	05010102	Beta-Adrenoceptor Blockers	Penicillinase-Resistant Penicillins	256	1521317	0.02%	148	273975	0.05%
04105100	06020100	Substance Dependence - Nicotine Dependence	Thyroid Hormones	217	1521317	0.01%	148	273975	0.05%
03010101	04050100	Selective Beta 2 Agonists	Anti-Obesity Products Acting On The Gastro-Intestinal Tract	185	1521317	0.01%	148	273975	0.05%
01030500	09060200	Proton Pump Inhibitors	Vitamin B Group	178	1521317	0.01%	148	273975	0.05%
13040000	13050000	Topical Corticosteroids	Preparations For Eczema And Psoriasis	266	1521317	0.02%	147	273975	0.05%
01060100	03040101	Bulk-Forming Laxatives	Non-Sedating Antihistamines	251	1521317	0.02%	147	273975	0.05%
01030500	11080100	Proton Pump Inhibitors	Tear Deficiency	200	1521317	0.01%	147	273975	0.05%
01050200	13020101	Corticosteroids In Chronic Bowel Problems	Emollient Bath Additives And Shower Preparations	185	1521317	0.01%	147	273975	0.05%
04030100	04080100	Tricyclic And Related Antidepressants	Control Of Epilepsy	162	1521317	0.01%	147	273975	0.05%
06040102	09010101	Progestogens And Progesterone Receptor Modulators	Oral Iron	421	1521317	0.03%	146	273975	0.05%
01020200	04020101	Other Antispasmodics	First-Generation Antipsychotic Drugs	279	1521317	0.02%	146	273975	0.05%
02040000	13020102	Beta-Adrenoceptor Blockers	Emollient Skin Preparations	239	1521317	0.02%	146	273975	0.05%
01060100	04030100	Bulk-Forming Laxatives	Tricyclic And Related Antidepressants	211	1521317	0.01%	146	273975	0.05%
01050200	03010200	Corticosteroids In Chronic Bowel Problems	Antimuscarinic Bronchodilators	165	1521317	0.01%	146	273975	0.05%
02120400	05010103	Statins	Broad-Spectrum Penicillins	163	1521317	0.01%	146	273975	0.05%
04020000	04030400	Products Used In Psychoses And Related Disorders	Other Antidepressants	152	1521317	0.01%	146	273975	0.05%
05010101	05010102	Benzylpenicillin And Phenoxymethylpenicillin	Penicillinase-Resistant Penicillins	526	1521317	0.03%	145	273975	0.05%
04065400	05010800	Products Used Against Nausea And Vertigo - Antihistamines	Sulphonamides And Trimethoprim	438	1521317	0.03%	145	273975	0.05%
01060100	10010100	Bulk-Forming Laxatives	Non-Steroidal Anti-Inflammatory Drugs	361	1521317	0.02%	145	273975	0.05%
10010100	11040200	Non-Steroidal Anti-Inflammatory Drugs	Other Anti-Inflammatory Eye Preparations (For The Eye)	311	1521317	0.02%	145	273975	0.05%
06020100	09050101	Thyroid Hormones	Calcium Supplements	228	1521317	0.01%	145	273975	0.05%
04030300	07020251	Selective Serotonin Re-Uptake Inhibitors (SSRI)	Preparations For Other Vaginal Infections	226	1521317	0.01%	145	273975	0.05%
04010201	05010300	Benzodiazepines	Tetracyclines	196	1521317	0.01%	145	273975	0.05%
01060200	04010201	Stimulant Laxatives	Benzodiazepines	180	1521317	0.01%	145	273975	0.05%
03020000	04070401	Corticosteroids (For Respiratory Conditions)	Acute Migraine	180	1521317	0.01%	145	273975	0.05%
04030000	05010103	Antidepressants	Broad-Spectrum Penicillins	175	1521317	0.01%	145	273975	0.05%
04030300	06010400	Selective Serotonin Re-Uptake Inhibitors (SSRI)	Treatment Of Hypoglycaemia	154	1521317	0.01%	145	273975	0.05%
03040102	04065400	Sedating Antihistamines	Products Used Against Nausea And Vertigo - Antihistamines	423	1521317	0.03%	144	273975	0.05%
01070000	07020250	Local Products For Anal Or Rectal Problems	Preparations For Vaginal And Vulval Candidiasis	413	1521317	0.03%	144	273975	0.05%
04060000	04105100	Products Used Against Nausea And Vertigo	Substance Dependence - Nicotine Dependence	334	1521317	0.02%	144	273975	0.05%
04105100	05010500	Substance Dependence - Nicotine Dependence	Macrolides	326	1521317	0.02%	144	273975	0.05%
01020100	01030500	Antimuscarinics	Proton Pump Inhibitors	265	1521317	0.02%	144	273975	0.05%
04080100	09010101	Control Of Epilepsy	Oral Iron	222	1521317	0.01%	144	273975	0.05%
04030100	05011100	Tricyclic And Related Antidepressants	Metronidazole And Tinidazole	203	1521317	0.01%	144	273975	0.05%
06020100	13020101	Thyroid Hormones	Emollient Bath Additives And Shower Preparations	198	1521317	0.01%	144	273975	0.05%
04030400	09060400	Other Antidepressants	Vitamin D	163	1521317	0.01%	144	273975	0.05%
07020250	12010151	Preparations For Vaginal And Vulval Candidiasis	Anti-Inflammatory Preparations	370	1521317	0.02%	143	273975	0.05%
06040102	10010100	Progestogens And Progesterone Receptor Modulators	Non-Steroidal Anti-Inflammatory Drugs	346	1521317	0.02%	143	273975	0.05%
01060100	04060000	Bulk-Forming Laxatives	Products Used Against Nausea And Vertigo	327	1521317	0.02%	143	273975	0.05%
03020000	06040102	Corticosteroids (For Respiratory Conditions)	Progestogens And Progesterone Receptor Modulators	215	1521317	0.01%	143	273975	0.05%
04020102	06020100	Second-Generation Antipsychotic Drugs	Thyroid Hormones	147	1521317	0.01%	143	273975	0.05%
05010101	09010101	Benzylpenicillin And Phenoxymethylpenicillin	Oral Iron	586	1521317	0.04%	142	273975	0.05%
04065500	05010800	Products Used Against Nausea And Vertigo - Domperidone & Metoclopramide	Sulphonamides And Trimethoprim	360	1521317	0.02%	142	273975	0.05%
05010201	05010300	Cephalosporins	Tetracyclines	321	1521317	0.02%	142	273975	0.05%
02090000	05010500	Antiplatelet Products	Macrolides	248	1521317	0.02%	142	273975	0.05%
01020200	01060200	Other Antispasmodics	Stimulant Laxatives	236	1521317	0.02%	142	273975	0.05%
01060100	03020000	Bulk-Forming Laxatives	Corticosteroids (For Respiratory Conditions)	210	1521317	0.01%	142	273975	0.05%
02040000	09060400	Beta-Adrenoceptor Blockers	Vitamin D	196	1521317	0.01%	142	273975	0.05%
05010103	12010100	Broad-Spectrum Penicillins	Drugs Acting On The Ear - Otitis Externa	466	1521317	0.03%	141	273975	0.05%
05010800	05020100	Sulphonamides And Trimethoprim	Triazole Antifungals	346	1521317	0.02%	141	273975	0.05%
05010800	13020102	Sulphonamides And Trimethoprim	Emollient Skin Preparations	298	1521317	0.02%	141	273975	0.05%
04070100	13100200	Non-Opioid And Compound Analgesics	Antifungal Preparations (Topical	295	1521317	0.02%	141	273975	0.05%
04080100	06040103	Control Of Epilepsy	Progestogen Products Doubling (In House Use)	241	1521317	0.02%	141	273975	0.05%
02060200	05010103	Calcium-Channel Blockers	Broad-Spectrum Penicillins	196	1521317	0.01%	141	273975	0.05%
04020000	04020102	Products Used In Psychoses And Related Disorders	Second-Generation Antipsychotic Drugs	155	1521317	0.01%	141	273975	0.05%
11040200	13020100	Other Anti-Inflammatory Eye Preparations (For The Eye)	Emollients	249	1521317	0.02%	140	273975	0.05%
03010101	14040200	Selective Beta 2 Agonists	Vaccines And Antisera - Influenza Vaccines	248	1521317	0.02%	140	273975	0.05%
04030400	05010101	Other Antidepressants	Benzylpenicillin And Phenoxymethylpenicillin	182	1521317	0.01%	140	273975	0.05%
01060200	06040103	Stimulant Laxatives	Progestogen Products Doubling (In House Use)	330	1521317	0.02%	139	273975	0.05%
07020250	13090000	Preparations For Vaginal And Vulval Candidiasis	Shampoos And Other Preparations For Scalp And Hair Conditions	315	1521317	0.02%	139	273975	0.05%
01060400	13100101	Osmotic Laxatives	Antibacterial Preparations Only Used Topically	308	1521317	0.02%	139	273975	0.05%
01010201	10030250	Compound Alginate Preparations	Topical Nsaids And Counter Irritants	302	1521317	0.02%	139	273975	0.05%
01060400	05010300	Osmotic Laxatives	Tetracyclines	286	1521317	0.02%	139	273975	0.05%
01010201	05010300	Compound Alginate Preparations	Tetracyclines	251	1521317	0.02%	139	273975	0.05%
04020101	04070401	First-Generation Antipsychotic Drugs	Acute Migraine	236	1521317	0.02%	139	273975	0.05%
03010101	05030201	Selective Beta 2 Agonists	Herpes Simplex And Varicella-Zoster Infection	222	1521317	0.01%	139	273975	0.05%
06010400	07020250	Treatment Of Hypoglycaemia	Preparations For Vaginal And Vulval Candidiasis	166	1521317	0.01%	139	273975	0.05%
01010101	04070100	Aluminium- And Magnesium- Containing Antacids	Non-Opioid And Compound Analgesics	339	1521317	0.02%	138	273975	0.05%
05010201	11040200	Cephalosporins	Other Anti-Inflammatory Eye Preparations (For The Eye)	295	1521317	0.02%	138	273975	0.05%
02090000	04010100	Antiplatelet Products	Hypnotics	234	1521317	0.02%	138	273975	0.05%
01040200	02040000	Antimotility Products	Beta-Adrenoceptor Blockers	194	1521317	0.01%	138	273975	0.05%
04080100	13040000	Control Of Epilepsy	Topical Corticosteroids	185	1521317	0.01%	138	273975	0.05%
06010101	10010100	Short-Acting Insulins	Non-Steroidal Anti-Inflammatory Drugs	175	1521317	0.01%	138	273975	0.05%
03090200	05010103	Demulcent And Expectorant Cough Preparations	Broad-Spectrum Penicillins	469	1521317	0.03%	137	273975	0.05%
04060000	06040102	Products Used Against Nausea And Vertigo	Progestogens And Progesterone Receptor Modulators	319	1521317	0.02%	137	273975	0.05%
10010100	13020101	Non-Steroidal Anti-Inflammatory Drugs	Emollient Bath Additives And Shower Preparations	241	1521317	0.02%	137	273975	0.05%
03010101	04065600	Selective Beta 2 Agonists	Products Used Against Nausea And Vertigo - 5 HT3 Antagonists	203	1521317	0.01%	137	273975	0.05%
02050200	05010103	Centrally Acting Antihypertensive Products	Broad-Spectrum Penicillins	203	1521317	0.01%	137	273975	0.05%
02110000	03010101	Antifibrinolytic Products And Haemostatics	Selective Beta 2 Agonists	198	1521317	0.01%	137	273975	0.05%
04020100	05010103	Antipsychotic Products	Broad-Spectrum Penicillins	483	1521317	0.03%	136	273975	0.05%
01060100	06040103	Bulk-Forming Laxatives	Progestogen Products Doubling (In House Use)	435	1521317	0.03%	136	273975	0.05%
01010201	04020100	Compound Alginate Preparations	Antipsychotic Products	416	1521317	0.03%	136	273975	0.05%
05010800	05011100	Sulphonamides And Trimethoprim	Metronidazole And Tinidazole	383	1521317	0.03%	136	273975	0.05%
05010201	13020100	Cephalosporins	Emollients	339	1521317	0.02%	136	273975	0.05%
02040000	05010300	Beta-Adrenoceptor Blockers	Tetracyclines	195	1521317	0.01%	136	273975	0.05%
02090000	04010201	Antiplatelet Products	Benzodiazepines	167	1521317	0.01%	136	273975	0.05%
04070200	06010202	Opioid Analgesics	Biguanides (Metformin)	151	1521317	0.01%	136	273975	0.05%
02090000	04065400	Antiplatelet Products	Products Used Against Nausea And Vertigo - Antihistamines	345	1521317	0.02%	135	273975	0.05%
03010000	05010500	Bronchodilators	Macrolides	230	1521317	0.02%	135	273975	0.05%
01050200	05010102	Corticosteroids In Chronic Bowel Problems	Penicillinase-Resistant Penicillins	219	1521317	0.01%	135	273975	0.05%
06020100	11030100	Thyroid Hormones	Antibacterials (In Eye Preparation)	219	1521317	0.01%	135	273975	0.05%
06010202	09060400	Biguanides (Metformin)	Vitamin D	189	1521317	0.01%	135	273975	0.05%
04010201	09060200	Benzodiazepines	Vitamin B Group	160	1521317	0.01%	135	273975	0.05%
06040103	13100101	Progestogen Products Doubling (In House Use)	Antibacterial Preparations Only Used Topically	545	1521317	0.04%	134	273975	0.05%
01030100	04065600	H2-Receptor Antagonists	Products Used Against Nausea And Vertigo - 5 HT3 Antagonists	325	1521317	0.02%	134	273975	0.05%
13020102	13100101	Emollient Skin Preparations	Antibacterial Preparations Only Used Topically	319	1521317	0.02%	134	273975	0.05%
09010101	13020101	Oral Iron	Emollient Bath Additives And Shower Preparations	311	1521317	0.02%	134	273975	0.05%
04060000	05010300	Products Used Against Nausea And Vertigo	Tetracyclines	247	1521317	0.02%	134	273975	0.05%
13020101	13090000	Emollient Bath Additives And Shower Preparations	Shampoos And Other Preparations For Scalp And Hair Conditions	220	1521317	0.01%	134	273975	0.05%
01050200	04065400	Corticosteroids In Chronic Bowel Problems	Products Used Against Nausea And Vertigo - Antihistamines	209	1521317	0.01%	134	273975	0.05%
05011100	05020100	Metronidazole And Tinidazole	Triazole Antifungals	435	1521317	0.03%	133	273975	0.05%
01030100	06040103	H2-Receptor Antagonists	Progestogen Products Doubling (In House Use)	329	1521317	0.02%	133	273975	0.05%
01070200	10010100	Compound Haemorrhoid Products With Corticosteroids	Non-Steroidal Anti-Inflammatory Drugs	328	1521317	0.02%	133	273975	0.05%
01060200	05010201	Stimulant Laxatives	Cephalosporins	270	1521317	0.02%	133	273975	0.05%
03010000	05010201	Bronchodilators	Cephalosporins	264	1521317	0.02%	133	273975	0.05%
01050200	04020101	Corticosteroids In Chronic Bowel Problems	First-Generation Antipsychotic Drugs	218	1521317	0.01%	133	273975	0.05%
03040101	11080100	Non-Sedating Antihistamines	Tear Deficiency	197	1521317	0.01%	133	273975	0.05%
04070100	06010400	Non-Opioid And Compound Analgesics	Treatment Of Hypoglycaemia	156	1521317	0.01%	133	273975	0.05%
05011300	13020102	Urinary-Tract Infections	Emollient Skin Preparations	316	1521317	0.02%	132	273975	0.05%
04105100	13020102	Substance Dependence - Nicotine Dependence	Emollient Skin Preparations	308	1521317	0.02%	132	273975	0.05%
10010100	13100101	Non-Steroidal Anti-Inflammatory Drugs	Antibacterial Preparations Only Used Topically	277	1521317	0.02%	132	273975	0.05%
04065500	13020102	Products Used Against Nausea And Vertigo - Domperidone & Metoclopramide	Emollient Skin Preparations	256	1521317	0.02%	132	273975	0.05%
01010201	13090000	Compound Alginate Preparations	Shampoos And Other Preparations For Scalp And Hair Conditions	255	1521317	0.02%	132	273975	0.05%
04070100	15020000	Non-Opioid And Compound Analgesics	Local Anaesthesia	240	1521317	0.02%	132	273975	0.05%
03020000	05011100	Corticosteroids (For Respiratory Conditions)	Metronidazole And Tinidazole	233	1521317	0.02%	132	273975	0.05%
09010200	13040000	Drugs Used In Megaloblastic Anaemias	Topical Corticosteroids	227	1521317	0.01%	132	273975	0.05%
05010103	06010400	Broad-Spectrum Penicillins	Treatment Of Hypoglycaemia	166	1521317	0.01%	132	273975	0.05%
01060400	04070300	Osmotic Laxatives	Neuropathic Pain	156	1521317	0.01%	132	273975	0.05%
01050100	03010101	Aminosalicylates	Selective Beta 2 Agonists	149	1521317	0.01%	132	273975	0.05%
02040000	04080100	Beta-Adrenoceptor Blockers	Control Of Epilepsy	144	1521317	0.01%	132	273975	0.05%
02050200	06010102	Centrally Acting Antihypertensive Products	Intermediate- And Long-Acting Insulins	143	1521317	0.01%	132	273975	0.05%
03090200	04070100	Demulcent And Expectorant Cough Preparations	Non-Opioid And Compound Analgesics	424	1521317	0.03%	131	273975	0.05%
05010103	13100200	Broad-Spectrum Penicillins	Antifungal Preparations (Topical	351	1521317	0.02%	131	273975	0.05%
07020250	13100300	Preparations For Vaginal And Vulval Candidiasis	Antiviral Preparations (Topical	319	1521317	0.02%	131	273975	0.05%
13040000	13100300	Topical Corticosteroids	Antiviral Preparations (Topical	265	1521317	0.02%	131	273975	0.05%
07020250	09010200	Preparations For Vaginal And Vulval Candidiasis	Drugs Used In Megaloblastic Anaemias	262	1521317	0.02%	131	273975	0.05%
06040102	12020101	Progestogens And Progesterone Receptor Modulators	Corticosteroids Used In Nasal Allergy	234	1521317	0.02%	131	273975	0.05%
03010101	13040200	Selective Beta 2 Agonists	Mild Topical Corticosteroids	220	1521317	0.01%	131	273975	0.05%
02040000	05010101	Beta-Adrenoceptor Blockers	Benzylpenicillin And Phenoxymethylpenicillin	203	1521317	0.01%	131	273975	0.05%
05010300	06020100	Tetracyclines	Thyroid Hormones	184	1521317	0.01%	131	273975	0.05%
03010101	03010400	Selective Beta 2 Agonists	Compound Bronchodilator Products	180	1521317	0.01%	131	273975	0.05%
06040103	11030100	Progestogen Products Doubling (In House Use)	Antibacterials (In Eye Preparation)	658	1521317	0.04%	130	273975	0.05%
04065400	09020100	Products Used Against Nausea And Vertigo - Antihistamines	Oral Preparations For Fluid And Electrolyte Imbalance	448	1521317	0.03%	130	273975	0.05%
07020250	13020103	Preparations For Vaginal And Vulval Candidiasis	Antimicrobial Emollients	302	1521317	0.02%	130	273975	0.05%
02110000	05010103	Antifibrinolytic Products And Haemostatics	Broad-Spectrum Penicillins	299	1521317	0.02%	130	273975	0.05%
04070100	13030000	Non-Opioid And Compound Analgesics	Topical Local Anaesthetics And Antipruritics	294	1521317	0.02%	130	273975	0.05%
03040101	05011100	Non-Sedating Antihistamines	Metronidazole And Tinidazole	271	1521317	0.02%	130	273975	0.05%
04060000	11040200	Products Used Against Nausea And Vertigo	Other Anti-Inflammatory Eye Preparations (For The Eye)	242	1521317	0.02%	130	273975	0.05%
03010101	13060100	Selective Beta 2 Agonists	Topical Preparations For Acne	224	1521317	0.01%	130	273975	0.05%
04030100	10030250	Tricyclic And Related Antidepressants	Topical Nsaids And Counter Irritants	172	1521317	0.01%	130	273975	0.05%
06010202	06010400	Biguanides (Metformin)	Treatment Of Hypoglycaemia	170	1521317	0.01%	130	273975	0.05%
01030500	03010000	Proton Pump Inhibitors	Bronchodilators	165	1521317	0.01%	130	273975	0.05%
01020200	05010500	Other Antispasmodics	Macrolides	228	1521317	0.01%	129	273975	0.05%
03040101	13090000	Non-Sedating Antihistamines	Shampoos And Other Preparations For Scalp And Hair Conditions	218	1521317	0.01%	129	273975	0.05%
11080100	13040000	Tear Deficiency	Topical Corticosteroids	213	1521317	0.01%	129	273975	0.05%
01060100	04070200	Bulk-Forming Laxatives	Opioid Analgesics	190	1521317	0.01%	129	273975	0.05%
02020100	04070100	Thiazides And Related Diuretics	Non-Opioid And Compound Analgesics	172	1521317	0.01%	129	273975	0.05%
04030300	09050101	Selective Serotonin Re-Uptake Inhibitors (SSRI)	Calcium Supplements	149	1521317	0.01%	129	273975	0.05%
01010201	11030100	Compound Alginate Preparations	Antibacterials (In Eye Preparation)	368	1521317	0.02%	128	273975	0.05%
04070100	05030201	Non-Opioid And Compound Analgesics	Herpes Simplex And Varicella-Zoster Infection	326	1521317	0.02%	128	273975	0.05%
03010101	05011200	Selective Beta 2 Agonists	Quinolones	202	1521317	0.01%	128	273975	0.05%
01030500	09050101	Proton Pump Inhibitors	Calcium Supplements	181	1521317	0.01%	128	273975	0.05%
04030300	15020000	Selective Serotonin Re-Uptake Inhibitors (SSRI)	Local Anaesthesia	181	1521317	0.01%	128	273975	0.05%
01040200	01050200	Antimotility Products	Corticosteroids In Chronic Bowel Problems	174	1521317	0.01%	128	273975	0.05%
01030500	04020000	Proton Pump Inhibitors	Products Used In Psychoses And Related Disorders	145	1521317	0.01%	128	273975	0.05%
04010100	04070300	Hypnotics	Neuropathic Pain	141	1521317	0.01%	128	273975	0.05%
09010101	11030100	Oral Iron	Antibacterials (In Eye Preparation)	395	1521317	0.03%	127	273975	0.05%
13030000	13040000	Topical Local Anaesthetics And Antipruritics	Topical Corticosteroids	372	1521317	0.02%	127	273975	0.05%
01060200	04020101	Stimulant Laxatives	First-Generation Antipsychotic Drugs	256	1521317	0.02%	127	273975	0.05%
04060000	09010200	Products Used Against Nausea And Vertigo	Drugs Used In Megaloblastic Anaemias	243	1521317	0.02%	127	273975	0.05%
05010103	11080100	Broad-Spectrum Penicillins	Tear Deficiency	231	1521317	0.02%	127	273975	0.05%
05010500	13020101	Macrolides	Emollient Bath Additives And Shower Preparations	212	1521317	0.01%	127	273975	0.05%
01030500	13100101	Proton Pump Inhibitors	Antibacterial Preparations Only Used Topically	198	1521317	0.01%	127	273975	0.05%
01030500	13090000	Proton Pump Inhibitors	Shampoos And Other Preparations For Scalp And Hair Conditions	196	1521317	0.01%	127	273975	0.05%
01040200	13020102	Antimotility Products	Emollient Skin Preparations	192	1521317	0.01%	127	273975	0.05%
11040200	13020101	Other Anti-Inflammatory Eye Preparations (For The Eye)	Emollient Bath Additives And Shower Preparations	183	1521317	0.01%	127	273975	0.05%
04020102	04020300	Second-Generation Antipsychotic Drugs	Products Used For Mania And Hypomania	156	1521317	0.01%	127	273975	0.05%
02050200	06010101	Centrally Acting Antihypertensive Products	Short-Acting Insulins	138	1521317	0.01%	127	273975	0.05%
05010102	11030100	Penicillinase-Resistant Penicillins	Antibacterials (In Eye Preparation)	434	1521317	0.03%	126	273975	0.05%
04105100	09010101	Substance Dependence - Nicotine Dependence	Oral Iron	420	1521317	0.03%	126	273975	0.05%
04020101	05010102	First-Generation Antipsychotic Drugs	Penicillinase-Resistant Penicillins	309	1521317	0.02%	126	273975	0.05%
05010500	12010151	Macrolides	Anti-Inflammatory Preparations	281	1521317	0.02%	126	273975	0.05%
01010201	05020100	Compound Alginate Preparations	Triazole Antifungals	257	1521317	0.02%	126	273975	0.05%
03040101	05020100	Non-Sedating Antihistamines	Triazole Antifungals	246	1521317	0.02%	126	273975	0.05%
04050100	05010103	Anti-Obesity Products Acting On The Gastro-Intestinal Tract	Broad-Spectrum Penicillins	212	1521317	0.01%	126	273975	0.05%
02020100	02050200	Thiazides And Related Diuretics	Centrally Acting Antihypertensive Products	183	1521317	0.01%	126	273975	0.05%
01070000	04030300	Local Products For Anal Or Rectal Problems	Selective Serotonin Re-Uptake Inhibitors (SSRI)	182	1521317	0.01%	126	273975	0.05%
04010100	05020100	Hypnotics	Triazole Antifungals	177	1521317	0.01%	126	273975	0.05%
04070200	13020100	Opioid Analgesics	Emollients	159	1521317	0.01%	126	273975	0.05%
02120400	06020100	Statins	Thyroid Hormones	136	1521317	0.01%	126	273975	0.05%
03090100	05010103	Cough Suppressants	Broad-Spectrum Penicillins	457	1521317	0.03%	125	273975	0.05%
05010103	13040200	Broad-Spectrum Penicillins	Mild Topical Corticosteroids	392	1521317	0.03%	125	273975	0.05%
07020250	07020251	Preparations For Vaginal And Vulval Candidiasis	Preparations For Other Vaginal Infections	384	1521317	0.03%	125	273975	0.05%
04065500	04070401	Products Used Against Nausea And Vertigo - Domperidone & Metoclopramide	Acute Migraine	227	1521317	0.01%	125	273975	0.05%
09060400	10010100	Vitamin D	Non-Steroidal Anti-Inflammatory Drugs	205	1521317	0.01%	125	273975	0.05%
04010100	04020000	Hypnotics	Products Used In Psychoses And Related Disorders	134	1521317	0.01%	125	273975	0.05%
06040102	06040103	Progestogens And Progesterone Receptor Modulators	Progestogen Products Doubling (In House Use)	422	1521317	0.03%	124	273975	0.05%
04070100	13040200	Non-Opioid And Compound Analgesics	Mild Topical Corticosteroids	294	1521317	0.02%	124	273975	0.05%
01010201	09060700	Compound Alginate Preparations	Multivitamin And Multimineral Preparations	292	1521317	0.02%	124	273975	0.05%
09060700	13040000	Multivitamin And Multimineral Preparations	Topical Corticosteroids	279	1521317	0.02%	124	273975	0.05%
01020200	05010800	Other Antispasmodics	Sulphonamides And Trimethoprim	256	1521317	0.02%	124	273975	0.05%
04070100	13060100	Non-Opioid And Compound Analgesics	Topical Preparations For Acne	251	1521317	0.02%	124	273975	0.05%
04065400	04070401	Products Used Against Nausea And Vertigo - Antihistamines	Acute Migraine	213	1521317	0.01%	124	273975	0.05%
01030500	12010151	Proton Pump Inhibitors	Anti-Inflammatory Preparations	184	1521317	0.01%	124	273975	0.05%
06020100	11080100	Thyroid Hormones	Tear Deficiency	167	1521317	0.01%	124	273975	0.05%
04010201	05011100	Benzodiazepines	Metronidazole And Tinidazole	164	1521317	0.01%	124	273975	0.05%
04030300	09020100	Selective Serotonin Re-Uptake Inhibitors (SSRI)	Oral Preparations For Fluid And Electrolyte Imbalance	163	1521317	0.01%	124	273975	0.05%
04030300	14040200	Selective Serotonin Re-Uptake Inhibitors (SSRI)	Vaccines And Antisera - Influenza Vaccines	158	1521317	0.01%	124	273975	0.05%
03010300	03030200	Theophylline	Leukotriene Receptor Antagonists	146	1521317	0.01%	124	273975	0.05%
02060200	06010202	Calcium-Channel Blockers	Biguanides (Metformin)	131	1521317	0.01%	124	273975	0.05%
11030100	12020101	Antibacterials (In Eye Preparation)	Corticosteroids Used In Nasal Allergy	294	1521317	0.02%	123	273975	0.04%
09060400	13020102	Vitamin D	Emollient Skin Preparations	224	1521317	0.01%	123	273975	0.04%
13020101	13090100	Emollient Bath Additives And Shower Preparations	Shampoos And Other Scalp Preparations	217	1521317	0.01%	123	273975	0.04%
04070200	04070402	Opioid Analgesics	Prophylaxis Of Migraine	148	1521317	0.01%	123	273975	0.04%
03020000	04080100	Corticosteroids (For Respiratory Conditions)	Control Of Epilepsy	133	1521317	0.01%	123	273975	0.04%
11030100	11040200	Antibacterials (In Eye Preparation)	Other Anti-Inflammatory Eye Preparations (For The Eye)	350	1521317	0.02%	122	273975	0.04%
05010500	05020100	Macrolides	Triazole Antifungals	259	1521317	0.02%	122	273975	0.04%
01020200	04065400	Other Antispasmodics	Products Used Against Nausea And Vertigo - Antihistamines	235	1521317	0.02%	122	273975	0.04%
01060200	04065500	Stimulant Laxatives	Products Used Against Nausea And Vertigo - Domperidone & Metoclopramide	230	1521317	0.02%	122	273975	0.04%
04105100	12020101	Substance Dependence - Nicotine Dependence	Corticosteroids Used In Nasal Allergy	221	1521317	0.01%	122	273975	0.04%
04030100	05010101	Tricyclic And Related Antidepressants	Benzylpenicillin And Phenoxymethylpenicillin	206	1521317	0.01%	122	273975	0.04%
01050200	04065500	Corticosteroids In Chronic Bowel Problems	Products Used Against Nausea And Vertigo - Domperidone & Metoclopramide	196	1521317	0.01%	122	273975	0.04%
04070100	09060200	Non-Opioid And Compound Analgesics	Vitamin B Group	190	1521317	0.01%	122	273975	0.04%
04080100	07020250	Control Of Epilepsy	Preparations For Vaginal And Vulval Candidiasis	186	1521317	0.01%	122	273975	0.04%
04010200	04030300	Anxiolytics	Selective Serotonin Re-Uptake Inhibitors (SSRI)	162	1521317	0.01%	122	273975	0.04%
02090000	06010400	Antiplatelet Products	Treatment Of Hypoglycaemia	142	1521317	0.01%	122	273975	0.04%
06040103	13060102	Progestogen Products Doubling (In House Use)	Topical Antibacterials For Acne	520	1521317	0.03%	121	273975	0.04%
11030100	13020102	Antibacterials (In Eye Preparation)	Emollient Skin Preparations	237	1521317	0.02%	121	273975	0.04%
12010151	12020101	Anti-Inflammatory Preparations	Corticosteroids Used In Nasal Allergy	234	1521317	0.02%	121	273975	0.04%
03010000	09010101	Bronchodilators	Oral Iron	233	1521317	0.02%	121	273975	0.04%
01060400	09010200	Osmotic Laxatives	Drugs Used In Megaloblastic Anaemias	212	1521317	0.01%	121	273975	0.04%
01050200	11040200	Corticosteroids In Chronic Bowel Problems	Other Anti-Inflammatory Eye Preparations (For The Eye)	180	1521317	0.01%	121	273975	0.04%
01060200	03020000	Stimulant Laxatives	Corticosteroids (For Respiratory Conditions)	164	1521317	0.01%	121	273975	0.04%
01010201	04080100	Compound Alginate Preparations	Control Of Epilepsy	162	1521317	0.01%	121	273975	0.04%
01060200	06020100	Stimulant Laxatives	Thyroid Hormones	157	1521317	0.01%	121	273975	0.04%
03030200	07020250	Leukotriene Receptor Antagonists	Preparations For Vaginal And Vulval Candidiasis	148	1521317	0.01%	121	273975	0.04%
01060400	13060102	Osmotic Laxatives	Topical Antibacterials For Acne	273	1521317	0.02%	120	273975	0.04%
03010101	04020100	Selective Beta 2 Agonists	Antipsychotic Products	215	1521317	0.01%	120	273975	0.04%
04070200	05010101	Opioid Analgesics	Benzylpenicillin And Phenoxymethylpenicillin	213	1521317	0.01%	120	273975	0.04%
01030500	11030100	Proton Pump Inhibitors	Antibacterials (In Eye Preparation)	204	1521317	0.01%	120	273975	0.04%
01070200	06020100	Compound Haemorrhoid Products With Corticosteroids	Thyroid Hormones	201	1521317	0.01%	120	273975	0.04%
05010800	06010102	Sulphonamides And Trimethoprim	Intermediate- And Long-Acting Insulins	160	1521317	0.01%	120	273975	0.04%
01050200	03010300	Corticosteroids In Chronic Bowel Problems	Theophylline	159	1521317	0.01%	120	273975	0.04%
04030100	04070402	Tricyclic And Related Antidepressants	Prophylaxis Of Migraine	138	1521317	0.01%	120	273975	0.04%
04060000	06010101	Products Used Against Nausea And Vertigo	Short-Acting Insulins	134	1521317	0.01%	120	273975	0.04%
05030201	07020250	Herpes Simplex And Varicella-Zoster Infection	Preparations For Vaginal And Vulval Candidiasis	305	1521317	0.02%	119	273975	0.04%
05010201	13100101	Cephalosporins	Antibacterial Preparations Only Used Topically	301	1521317	0.02%	119	273975	0.04%
04065400	05010102	Products Used Against Nausea And Vertigo - Antihistamines	Penicillinase-Resistant Penicillins	297	1521317	0.02%	119	273975	0.04%
05020100	10010100	Triazole Antifungals	Non-Steroidal Anti-Inflammatory Drugs	288	1521317	0.02%	119	273975	0.04%
01060400	09060700	Osmotic Laxatives	Multivitamin And Multimineral Preparations	247	1521317	0.02%	119	273975	0.04%
01040200	05010800	Antimotility Products	Sulphonamides And Trimethoprim	236	1521317	0.02%	119	273975	0.04%
02040000	04105100	Beta-Adrenoceptor Blockers	Substance Dependence - Nicotine Dependence	184	1521317	0.01%	119	273975	0.04%
04030300	13030000	Selective Serotonin Re-Uptake Inhibitors (SSRI)	Topical Local Anaesthetics And Antipruritics	172	1521317	0.01%	119	273975	0.04%
01030500	02080100	Proton Pump Inhibitors	Parenteral Anticoagulants	164	1521317	0.01%	119	273975	0.04%
01030500	07040250	Proton Pump Inhibitors	Urinary Incontinence	148	1521317	0.01%	119	273975	0.04%
02040000	03020000	Beta-Adrenoceptor Blockers	Corticosteroids (For Respiratory Conditions)	143	1521317	0.01%	119	273975	0.04%
03010200	05010103	Antimuscarinic Bronchodilators	Broad-Spectrum Penicillins	136	1521317	0.01%	119	273975	0.04%
03040101	13030000	Non-Sedating Antihistamines	Topical Local Anaesthetics And Antipruritics	330	1521317	0.02%	118	273975	0.04%
01070000	04070100	Local Products For Anal Or Rectal Problems	Non-Opioid And Compound Analgesics	270	1521317	0.02%	118	273975	0.04%
05010102	13020103	Penicillinase-Resistant Penicillins	Antimicrobial Emollients	267	1521317	0.02%	118	273975	0.04%
03020000	11030100	Corticosteroids (For Respiratory Conditions)	Antibacterials (In Eye Preparation)	236	1521317	0.02%	118	273975	0.04%
03040102	13020103	Sedating Antihistamines	Antimicrobial Emollients	228	1521317	0.01%	118	273975	0.04%
01020200	01030100	Other Antispasmodics	H2-Receptor Antagonists	221	1521317	0.01%	118	273975	0.04%
04070402	05010103	Prophylaxis Of Migraine	Broad-Spectrum Penicillins	174	1521317	0.01%	118	273975	0.04%
01050300	09010101	Products Affecting The Immune Response In Chronic Bowel Problems	Oral Iron	164	1521317	0.01%	118	273975	0.04%
04030300	71580200	Selective Serotonin Re-Uptake Inhibitors (SSRI)	Emollient Ointment	153	1521317	0.01%	118	273975	0.04%
03040101	04080100	Non-Sedating Antihistamines	Control Of Epilepsy	141	1521317	0.01%	118	273975	0.04%
04010201	04020000	Benzodiazepines	Products Used In Psychoses And Related Disorders	127	1521317	0.01%	118	273975	0.04%
01010201	01070000	Compound Alginate Preparations	Local Products For Anal Or Rectal Problems	336	1521317	0.02%	117	273975	0.04%
07020250	12030100	Preparations For Vaginal And Vulval Candidiasis	Drugs For Oral Ulceration And Inflammation	324	1521317	0.02%	117	273975	0.04%
05010201	06040102	Cephalosporins	Progestogens And Progesterone Receptor Modulators	292	1521317	0.02%	117	273975	0.04%
05010101	13020102	Benzylpenicillin And Phenoxymethylpenicillin	Emollient Skin Preparations	290	1521317	0.02%	117	273975	0.04%
02090000	04065500	Antiplatelet Products	Products Used Against Nausea And Vertigo - Domperidone & Metoclopramide	234	1521317	0.02%	117	273975	0.04%
01020200	05011300	Other Antispasmodics	Urinary-Tract Infections	212	1521317	0.01%	117	273975	0.04%
04070401	09010101	Acute Migraine	Oral Iron	209	1521317	0.01%	117	273975	0.04%
01040200	05011300	Antimotility Products	Urinary-Tract Infections	199	1521317	0.01%	117	273975	0.04%
02050200	09010101	Centrally Acting Antihypertensive Products	Oral Iron	170	1521317	0.01%	117	273975	0.04%
04010100	13020101	Hypnotics	Emollient Bath Additives And Shower Preparations	160	1521317	0.01%	117	273975	0.04%
04020000	13040000	Products Used In Psychoses And Related Disorders	Topical Corticosteroids	156	1521317	0.01%	117	273975	0.04%
01060400	04080100	Osmotic Laxatives	Control Of Epilepsy	154	1521317	0.01%	117	273975	0.04%
03010000	06020100	Bronchodilators	Thyroid Hormones	132	1521317	0.01%	117	273975	0.04%
04030400	09060200	Other Antidepressants	Vitamin B Group	125	1521317	0.01%	117	273975	0.04%
05010300	13060102	Tetracyclines	Topical Antibacterials For Acne	355	1521317	0.02%	116	273975	0.04%
01060400	05020100	Osmotic Laxatives	Triazole Antifungals	263	1521317	0.02%	116	273975	0.04%
13020100	13020103	Emollients	Antimicrobial Emollients	227	1521317	0.01%	116	273975	0.04%
02080100	09010101	Parenteral Anticoagulants	Oral Iron	220	1521317	0.01%	116	273975	0.04%
03040101	10030250	Non-Sedating Antihistamines	Topical Nsaids And Counter Irritants	181	1521317	0.01%	116	273975	0.04%
01020000	04070200	Antispasmodics And Products Affecting Motility	Opioid Analgesics	160	1521317	0.01%	116	273975	0.04%
01060400	06010101	Osmotic Laxatives	Short-Acting Insulins	142	1521317	0.01%	116	273975	0.04%
04010100	05010101	Hypnotics	Benzylpenicillin And Phenoxymethylpenicillin	251	1521317	0.02%	115	273975	0.04%
04010201	05010101	Benzodiazepines	Benzylpenicillin And Phenoxymethylpenicillin	170	1521317	0.01%	115	273975	0.04%
01020200	13020102	Other Antispasmodics	Emollient Skin Preparations	161	1521317	0.01%	115	273975	0.04%
01060400	03010000	Osmotic Laxatives	Bronchodilators	152	1521317	0.01%	115	273975	0.04%
04030100	13020100	Tricyclic And Related Antidepressants	Emollients	150	1521317	0.01%	115	273975	0.04%
04060000	09060200	Products Used Against Nausea And Vertigo	Vitamin B Group	371	1521317	0.02%	114	273975	0.04%
05010201	11030100	Cephalosporins	Antibacterials (In Eye Preparation)	365	1521317	0.02%	114	273975	0.04%
04065400	05010101	Products Used Against Nausea And Vertigo - Antihistamines	Benzylpenicillin And Phenoxymethylpenicillin	330	1521317	0.02%	114	273975	0.04%
04070100	09020102	Non-Opioid And Compound Analgesics	Oral Sodium And Water	315	1521317	0.02%	114	273975	0.04%
04060000	05011100	Products Used Against Nausea And Vertigo	Metronidazole And Tinidazole	296	1521317	0.02%	114	273975	0.04%
07020250	09060700	Preparations For Vaginal And Vulval Candidiasis	Multivitamin And Multimineral Preparations	285	1521317	0.02%	114	273975	0.04%
05011200	07020250	Quinolones	Preparations For Vaginal And Vulval Candidiasis	281	1521317	0.02%	114	273975	0.04%
05010102	05010300	Penicillinase-Resistant Penicillins	Tetracyclines	249	1521317	0.02%	114	273975	0.04%
03040101	13060102	Non-Sedating Antihistamines	Topical Antibacterials For Acne	234	1521317	0.02%	114	273975	0.04%
01070200	12020101	Compound Haemorrhoid Products With Corticosteroids	Corticosteroids Used In Nasal Allergy	197	1521317	0.01%	114	273975	0.04%
05010201	06010202	Cephalosporins	Biguanides (Metformin)	173	1521317	0.01%	114	273975	0.04%
05011100	06020100	Metronidazole And Tinidazole	Thyroid Hormones	170	1521317	0.01%	114	273975	0.04%
04030300	12010100	Selective Serotonin Re-Uptake Inhibitors (SSRI)	Drugs Acting On The Ear - Otitis Externa	165	1521317	0.01%	114	273975	0.04%
02050501	06040103	Angiotensin-Converting Enzyme Inhibitors (ACE Inhibitors)	Progestogen Products Doubling (In House Use)	161	1521317	0.01%	114	273975	0.04%
06020100	13100101	Thyroid Hormones	Antibacterial Preparations Only Used Topically	161	1521317	0.01%	114	273975	0.04%
01020100	03010101	Antimuscarinics	Selective Beta 2 Agonists	151	1521317	0.01%	114	273975	0.04%
10030250	13040000	Topical Nsaids And Counter Irritants	Topical Corticosteroids	236	1521317	0.02%	113	273975	0.04%
01030100	05010500	H2-Receptor Antagonists	Macrolides	222	1521317	0.01%	113	273975	0.04%
01030500	12030100	Proton Pump Inhibitors	Drugs For Oral Ulceration And Inflammation	185	1521317	0.01%	113	273975	0.04%
11080100	12020101	Tear Deficiency	Corticosteroids Used In Nasal Allergy	172	1521317	0.01%	113	273975	0.04%
04030300	13060101	Selective Serotonin Re-Uptake Inhibitors (SSRI)	Benzoyl Peroxide And Azelaic Acid For Acne	170	1521317	0.01%	113	273975	0.04%
04070200	05020100	Opioid Analgesics	Triazole Antifungals	160	1521317	0.01%	113	273975	0.04%
03040101	09010200	Non-Sedating Antihistamines	Drugs Used In Megaloblastic Anaemias	149	1521317	0.01%	113	273975	0.04%
01050200	02040000	Corticosteroids In Chronic Bowel Problems	Beta-Adrenoceptor Blockers	144	1521317	0.01%	113	273975	0.04%
05010800	06010101	Sulphonamides And Trimethoprim	Short-Acting Insulins	142	1521317	0.01%	113	273975	0.04%
01060400	04030000	Osmotic Laxatives	Antidepressants	127	1521317	0.01%	113	273975	0.04%
02050200	06010202	Centrally Acting Antihypertensive Products	Biguanides (Metformin)	123	1521317	0.01%	113	273975	0.04%
03040102	13030000	Sedating Antihistamines	Topical Local Anaesthetics And Antipruritics	327	1521317	0.02%	112	273975	0.04%
07020250	10030250	Preparations For Vaginal And Vulval Candidiasis	Topical Nsaids And Counter Irritants	275	1521317	0.02%	112	273975	0.04%
04065600	05011300	Products Used Against Nausea And Vertigo - 5 HT3 Antagonists	Urinary-Tract Infections	236	1521317	0.02%	112	273975	0.04%
05030201	13040000	Herpes Simplex And Varicella-Zoster Infection	Topical Corticosteroids	230	1521317	0.02%	112	273975	0.04%
01040200	05010102	Antimotility Products	Penicillinase-Resistant Penicillins	208	1521317	0.01%	112	273975	0.04%
02040000	05011100	Beta-Adrenoceptor Blockers	Metronidazole And Tinidazole	177	1521317	0.01%	112	273975	0.04%
02090000	04070401	Antiplatelet Products	Acute Migraine	172	1521317	0.01%	112	273975	0.04%
02060200	09010101	Calcium-Channel Blockers	Oral Iron	172	1521317	0.01%	112	273975	0.04%
01050200	05010800	Corticosteroids In Chronic Bowel Problems	Sulphonamides And Trimethoprim	167	1521317	0.01%	112	273975	0.04%
04060000	04070300	Products Used Against Nausea And Vertigo	Neuropathic Pain	135	1521317	0.01%	112	273975	0.04%
03010000	04070200	Bronchodilators	Opioid Analgesics	132	1521317	0.01%	112	273975	0.04%
04020102	05011300	Second-Generation Antipsychotic Drugs	Urinary-Tract Infections	126	1521317	0.01%	112	273975	0.04%
01060100	04030400	Bulk-Forming Laxatives	Other Antidepressants	125	1521317	0.01%	112	273975	0.04%
04080100	06020100	Control Of Epilepsy	Thyroid Hormones	122	1521317	0.01%	112	273975	0.04%
01050300	04030300	Products Affecting The Immune Response In Chronic Bowel Problems	Selective Serotonin Re-Uptake Inhibitors (SSRI)	121	1521317	0.01%	112	273975	0.04%
06010102	12020101	Intermediate- And Long-Acting Insulins	Corticosteroids Used In Nasal Allergy	121	1521317	0.01%	112	273975	0.04%
04020102	05010201	Second-Generation Antipsychotic Drugs	Cephalosporins	118	1521317	0.01%	112	273975	0.04%
05010102	05010800	Penicillinase-Resistant Penicillins	Sulphonamides And Trimethoprim	291	1521317	0.02%	111	273975	0.04%
05010103	11040100	Broad-Spectrum Penicillins	Corticosteroids (In Eye Preparations)	258	1521317	0.02%	111	273975	0.04%
05010103	13060100	Broad-Spectrum Penicillins	Topical Preparations For Acne	257	1521317	0.02%	111	273975	0.04%
03040101	06040102	Non-Sedating Antihistamines	Progestogens And Progesterone Receptor Modulators	213	1521317	0.01%	111	273975	0.04%
03020000	13020103	Corticosteroids (For Respiratory Conditions)	Antimicrobial Emollients	166	1521317	0.01%	111	273975	0.04%
01050200	10010300	Corticosteroids In Chronic Bowel Problems	Drugs That Suppress The Rheumatic Disease Process	160	1521317	0.01%	111	273975	0.04%
01050200	09050101	Corticosteroids In Chronic Bowel Problems	Calcium Supplements	158	1521317	0.01%	111	273975	0.04%
04050100	06010202	Anti-Obesity Products Acting On The Gastro-Intestinal Tract	Biguanides (Metformin)	150	1521317	0.01%	111	273975	0.04%
02020100	04030300	Thiazides And Related Diuretics	Selective Serotonin Re-Uptake Inhibitors (SSRI)	127	1521317	0.01%	111	273975	0.04%
02060200	06020100	Calcium-Channel Blockers	Thyroid Hormones	116	1521317	0.01%	111	273975	0.04%
05010500	11030100	Macrolides	Antibacterials (In Eye Preparation)	347	1521317	0.02%	110	273975	0.04%
05010300	09010101	Tetracyclines	Oral Iron	290	1521317	0.02%	110	273975	0.04%
01060100	04020101	Bulk-Forming Laxatives	First-Generation Antipsychotic Drugs	263	1521317	0.02%	110	273975	0.04%
03040101	13100101	Non-Sedating Antihistamines	Antibacterial Preparations Only Used Topically	239	1521317	0.02%	110	273975	0.04%
01030100	05011300	H2-Receptor Antagonists	Urinary-Tract Infections	221	1521317	0.01%	110	273975	0.04%
05010300	13020102	Tetracyclines	Emollient Skin Preparations	219	1521317	0.01%	110	273975	0.04%
02040000	03040102	Beta-Adrenoceptor Blockers	Sedating Antihistamines	173	1521317	0.01%	110	273975	0.04%
04010100	09060700	Hypnotics	Multivitamin And Multimineral Preparations	149	1521317	0.01%	110	273975	0.04%
04030100	06040102	Tricyclic And Related Antidepressants	Progestogens And Progesterone Receptor Modulators	138	1521317	0.01%	110	273975	0.04%
04070200	13020101	Opioid Analgesics	Emollient Bath Additives And Shower Preparations	129	1521317	0.01%	110	273975	0.04%
04020101	05010101	First-Generation Antipsychotic Drugs	Benzylpenicillin And Phenoxymethylpenicillin	346	1521317	0.02%	109	273975	0.04%
04070100	13100400	Non-Opioid And Compound Analgesics	Parasiticidal Preparations (Topical)	289	1521317	0.02%	109	273975	0.04%
01010201	13060102	Compound Alginate Preparations	Topical Antibacterials For Acne	270	1521317	0.02%	109	273975	0.04%
04010100	04065600	Hypnotics	Products Used Against Nausea And Vertigo - 5 HT3 Antagonists	224	1521317	0.01%	109	273975	0.04%
02090000	05010800	Antiplatelet Products	Sulphonamides And Trimethoprim	209	1521317	0.01%	109	273975	0.04%
01030100	13020102	H2-Receptor Antagonists	Emollient Skin Preparations	193	1521317	0.01%	109	273975	0.04%
04070100	10010300	Non-Opioid And Compound Analgesics	Drugs That Suppress The Rheumatic Disease Process	148	1521317	0.01%	109	273975	0.04%
01060400	06010102	Osmotic Laxatives	Intermediate- And Long-Acting Insulins	134	1521317	0.01%	109	273975	0.04%
04060000	06010102	Products Used Against Nausea And Vertigo	Intermediate- And Long-Acting Insulins	122	1521317	0.01%	109	273975	0.04%
02050200	04030300	Centrally Acting Antihypertensive Products	Selective Serotonin Re-Uptake Inhibitors (SSRI)	118	1521317	0.01%	109	273975	0.04%
02050200	06020100	Centrally Acting Antihypertensive Products	Thyroid Hormones	114	1521317	0.01%	109	273975	0.04%
04030400	06010202	Other Antidepressants	Biguanides (Metformin)	112	1521317	0.01%	109	273975	0.04%
04065400	09020102	Products Used Against Nausea And Vertigo - Antihistamines	Oral Sodium And Water	387	1521317	0.03%	108	273975	0.04%
02110000	09010101	Antifibrinolytic Products And Haemostatics	Oral Iron	305	1521317	0.02%	108	273975	0.04%
05010102	05020100	Penicillinase-Resistant Penicillins	Triazole Antifungals	266	1521317	0.02%	108	273975	0.04%
04065500	05010102	Products Used Against Nausea And Vertigo - Domperidone & Metoclopramide	Penicillinase-Resistant Penicillins	247	1521317	0.02%	108	273975	0.04%
01020100	05010103	Antimuscarinics	Broad-Spectrum Penicillins	225	1521317	0.01%	108	273975	0.04%
05011300	09060400	Urinary-Tract Infections	Vitamin D	221	1521317	0.01%	108	273975	0.04%
03020000	13100101	Corticosteroids (For Respiratory Conditions)	Antibacterial Preparations Only Used Topically	205	1521317	0.01%	108	273975	0.04%
03010101	13100200	Selective Beta 2 Agonists	Antifungal Preparations (Topical	200	1521317	0.01%	108	273975	0.04%
01020000	05010103	Antispasmodics And Products Affecting Motility	Broad-Spectrum Penicillins	199	1521317	0.01%	108	273975	0.04%
04070401	05010201	Acute Migraine	Cephalosporins	179	1521317	0.01%	108	273975	0.04%
01010201	02080100	Compound Alginate Preparations	Parenteral Anticoagulants	173	1521317	0.01%	108	273975	0.04%
01050100	05010103	Aminosalicylates	Broad-Spectrum Penicillins	173	1521317	0.01%	108	273975	0.04%
02040000	02050502	Beta-Adrenoceptor Blockers	Angiotensin-II Receptor Antagonists	161	1521317	0.01%	108	273975	0.04%
13040000	13050300	Topical Corticosteroids	Drugs Affecting The Immune Response For Eczema And Psoriasis	150	1521317	0.01%	108	273975	0.04%
03030200	13020102	Leukotriene Receptor Antagonists	Emollient Skin Preparations	128	1521317	0.01%	108	273975	0.04%
10010100	11030100	Non-Steroidal Anti-Inflammatory Drugs	Antibacterials (In Eye Preparation)	321	1521317	0.02%	107	273975	0.04%
02090000	05010101	Antiplatelet Products	Benzylpenicillin And Phenoxymethylpenicillin	263	1521317	0.02%	107	273975	0.04%
01010201	09010200	Compound Alginate Preparations	Drugs Used In Megaloblastic Anaemias	206	1521317	0.01%	107	273975	0.04%
01070200	03020000	Compound Haemorrhoid Products With Corticosteroids	Corticosteroids (For Respiratory Conditions)	169	1521317	0.01%	107	273975	0.04%
01040200	02090000	Antimotility Products	Antiplatelet Products	165	1521317	0.01%	107	273975	0.04%
01050200	05011300	Corticosteroids In Chronic Bowel Problems	Urinary-Tract Infections	155	1521317	0.01%	107	273975	0.04%
03010000	04010100	Bronchodilators	Hypnotics	143	1521317	0.01%	107	273975	0.04%
04030300	13050200	Selective Serotonin Re-Uptake Inhibitors (SSRI)	Preparations For Psoriasis	143	1521317	0.01%	107	273975	0.04%
06010102	13020102	Intermediate- And Long-Acting Insulins	Emollient Skin Preparations	126	1521317	0.01%	107	273975	0.04%
03040101	04070300	Non-Sedating Antihistamines	Neuropathic Pain	125	1521317	0.01%	107	273975	0.04%
04030400	09060700	Other Antidepressants	Multivitamin And Multimineral Preparations	124	1521317	0.01%	107	273975	0.04%
04030400	13060102	Other Antidepressants	Topical Antibacterials For Acne	124	1521317	0.01%	107	273975	0.04%
04030400	13020101	Other Antidepressants	Emollient Bath Additives And Shower Preparations	121	1521317	0.01%	107	273975	0.04%
04030400	05020100	Other Antidepressants	Triazole Antifungals	119	1521317	0.01%	107	273975	0.04%
04020102	05010800	Second-Generation Antipsychotic Drugs	Sulphonamides And Trimethoprim	117	1521317	0.01%	107	273975	0.04%
03100000	05010103	Systemic Nasal Decongestants	Broad-Spectrum Penicillins	321	1521317	0.02%	106	273975	0.04%
04105100	05010102	Substance Dependence - Nicotine Dependence	Penicillinase-Resistant Penicillins	279	1521317	0.02%	106	273975	0.04%
01010201	04065600	Compound Alginate Preparations	Products Used Against Nausea And Vertigo - 5 HT3 Antagonists	275	1521317	0.02%	106	273975	0.04%
01060400	11030100	Osmotic Laxatives	Antibacterials (In Eye Preparation)	271	1521317	0.02%	106	273975	0.04%
04020101	04105100	First-Generation Antipsychotic Drugs	Substance Dependence - Nicotine Dependence	239	1521317	0.02%	106	273975	0.04%
02090000	09060700	Antiplatelet Products	Multivitamin And Multimineral Preparations	224	1521317	0.01%	106	273975	0.04%
05020100	12020101	Triazole Antifungals	Corticosteroids Used In Nasal Allergy	205	1521317	0.01%	106	273975	0.04%
05011100	12020101	Metronidazole And Tinidazole	Corticosteroids Used In Nasal Allergy	204	1521317	0.01%	106	273975	0.04%
04070100	13050200	Non-Opioid And Compound Analgesics	Preparations For Psoriasis	182	1521317	0.01%	106	273975	0.04%
03040101	13090100	Non-Sedating Antihistamines	Shampoos And Other Scalp Preparations	157	1521317	0.01%	106	273975	0.04%
01020000	03010101	Antispasmodics And Products Affecting Motility	Selective Beta 2 Agonists	136	1521317	0.01%	106	273975	0.04%
04020300	04070100	Products Used For Mania And Hypomania	Non-Opioid And Compound Analgesics	125	1521317	0.01%	106	273975	0.04%
01010201	03030200	Compound Alginate Preparations	Leukotriene Receptor Antagonists	124	1521317	0.01%	106	273975	0.04%
04020102	12020101	Second-Generation Antipsychotic Drugs	Corticosteroids Used In Nasal Allergy	111	1521317	0.01%	106	273975	0.04%
03030200	04070200	Leukotriene Receptor Antagonists	Opioid Analgesics	110	1521317	0.01%	106	273975	0.04%
09010101	13100101	Oral Iron	Antibacterial Preparations Only Used Topically	307	1521317	0.02%	105	273975	0.04%
01070200	05010201	Compound Haemorrhoid Products With Corticosteroids	Cephalosporins	292	1521317	0.02%	105	273975	0.04%
02090000	06040103	Antiplatelet Products	Progestogen Products Doubling (In House Use)	271	1521317	0.02%	105	273975	0.04%
05010201	09060400	Cephalosporins	Vitamin D	254	1521317	0.02%	105	273975	0.04%
03100000	04070100	Systemic Nasal Decongestants	Non-Opioid And Compound Analgesics	253	1521317	0.02%	105	273975	0.04%
05010201	13020101	Cephalosporins	Emollient Bath Additives And Shower Preparations	220	1521317	0.01%	105	273975	0.04%
01060400	13090000	Osmotic Laxatives	Shampoos And Other Preparations For Scalp And Hair Conditions	191	1521317	0.01%	105	273975	0.04%
03010101	15020000	Selective Beta 2 Agonists	Local Anaesthesia	163	1521317	0.01%	105	273975	0.04%
04010100	09060400	Hypnotics	Vitamin D	159	1521317	0.01%	105	273975	0.04%
01010101	04030300	Aluminium- And Magnesium- Containing Antacids	Selective Serotonin Re-Uptake Inhibitors (SSRI)	151	1521317	0.01%	105	273975	0.04%
05010102	06010102	Penicillinase-Resistant Penicillins	Intermediate- And Long-Acting Insulins	141	1521317	0.01%	105	273975	0.04%
04070100	10020200	Non-Opioid And Compound Analgesics	Skeletal Muscle Relaxants	141	1521317	0.01%	105	273975	0.04%
04030100	13020101	Tricyclic And Related Antidepressants	Emollient Bath Additives And Shower Preparations	130	1521317	0.01%	105	273975	0.04%
02050501	04030100	Angiotensin-Converting Enzyme Inhibitors (ACE Inhibitors)	Tricyclic And Related Antidepressants	112	1521317	0.01%	105	273975	0.04%
01040200	04020102	Antimotility Products	Second-Generation Antipsychotic Drugs	109	1521317	0.01%	105	273975	0.04%
13040000	13100400	Topical Corticosteroids	Parasiticidal Preparations (Topical)	406	1521317	0.03%	104	273975	0.04%
04070100	12010100	Non-Opioid And Compound Analgesics	Drugs Acting On The Ear - Otitis Externa	267	1521317	0.02%	104	273975	0.04%
13020102	13040200	Emollient Skin Preparations	Mild Topical Corticosteroids	266	1521317	0.02%	104	273975	0.04%
03040102	05011300	Sedating Antihistamines	Urinary-Tract Infections	253	1521317	0.02%	104	273975	0.04%
01010201	13100300	Compound Alginate Preparations	Antiviral Preparations (Topical	227	1521317	0.01%	104	273975	0.04%
05010500	13020100	Macrolides	Emollients	226	1521317	0.01%	104	273975	0.04%
05010103	09050101	Broad-Spectrum Penicillins	Calcium Supplements	212	1521317	0.01%	104	273975	0.04%
03040101	71580200	Non-Sedating Antihistamines	Emollient Ointment	193	1521317	0.01%	104	273975	0.04%
01060100	04010100	Bulk-Forming Laxatives	Hypnotics	158	1521317	0.01%	104	273975	0.04%
05010500	06010202	Macrolides	Biguanides (Metformin)	136	1521317	0.01%	104	273975	0.04%
05010102	06010101	Penicillinase-Resistant Penicillins	Short-Acting Insulins	128	1521317	0.01%	104	273975	0.04%
05010500	06010102	Macrolides	Intermediate- And Long-Acting Insulins	126	1521317	0.01%	104	273975	0.04%
04020300	04030400	Products Used For Mania And Hypomania	Other Antidepressants	108	1521317	0.01%	104	273975	0.04%
04030400	06010102	Other Antidepressants	Intermediate- And Long-Acting Insulins	104	1521317	0.01%	104	273975	0.04%
01060100	13020102	Bulk-Forming Laxatives	Emollient Skin Preparations	217	1521317	0.01%	103	273975	0.04%
04030300	09020102	Selective Serotonin Re-Uptake Inhibitors (SSRI)	Oral Sodium And Water	149	1521317	0.01%	103	273975	0.04%
01060200	12020101	Stimulant Laxatives	Corticosteroids Used In Nasal Allergy	145	1521317	0.01%	103	273975	0.04%
03010101	09060200	Selective Beta 2 Agonists	Vitamin B Group	122	1521317	0.01%	103	273975	0.04%
04030000	10010100	Antidepressants	Non-Steroidal Anti-Inflammatory Drugs	121	1521317	0.01%	103	273975	0.04%
05010101	05010800	Benzylpenicillin And Phenoxymethylpenicillin	Sulphonamides And Trimethoprim	359	1521317	0.02%	102	273975	0.04%
06040103	15020000	Progestogen Products Doubling (In House Use)	Local Anaesthesia	338	1521317	0.02%	102	273975	0.04%
05010103	05030201	Broad-Spectrum Penicillins	Herpes Simplex And Varicella-Zoster Infection	309	1521317	0.02%	102	273975	0.04%
01010101	05010103	Aluminium- And Magnesium- Containing Antacids	Broad-Spectrum Penicillins	289	1521317	0.02%	102	273975	0.04%
05030201	13100300	Herpes Simplex And Varicella-Zoster Infection	Antiviral Preparations (Topical	264	1521317	0.02%	102	273975	0.04%
01010201	13040200	Compound Alginate Preparations	Mild Topical Corticosteroids	244	1521317	0.02%	102	273975	0.04%
12020101	13100101	Corticosteroids Used In Nasal Allergy	Antibacterial Preparations Only Used Topically	188	1521317	0.01%	102	273975	0.04%
04060000	13020101	Products Used Against Nausea And Vertigo	Emollient Bath Additives And Shower Preparations	168	1521317	0.01%	102	273975	0.04%
03040101	05030201	Non-Sedating Antihistamines	Herpes Simplex And Varicella-Zoster Infection	159	1521317	0.01%	102	273975	0.04%
03010000	10010100	Bronchodilators	Non-Steroidal Anti-Inflammatory Drugs	159	1521317	0.01%	102	273975	0.04%
03010000	13020101	Bronchodilators	Emollient Bath Additives And Shower Preparations	138	1521317	0.01%	102	273975	0.04%
02040000	09060700	Beta-Adrenoceptor Blockers	Multivitamin And Multimineral Preparations	135	1521317	0.01%	102	273975	0.04%
04070200	11040200	Opioid Analgesics	Other Anti-Inflammatory Eye Preparations (For The Eye)	135	1521317	0.01%	102	273975	0.04%
12020101	13020103	Corticosteroids Used In Nasal Allergy	Antimicrobial Emollients	135	1521317	0.01%	102	273975	0.04%
04030300	06040101	Selective Serotonin Re-Uptake Inhibitors (SSRI)	Oestrogens And HRT	127	1521317	0.01%	102	273975	0.04%
04070200	06010102	Opioid Analgesics	Intermediate- And Long-Acting Insulins	113	1521317	0.01%	102	273975	0.04%
04020100	04065500	Antipsychotic Products	Products Used Against Nausea And Vertigo - Domperidone & Metoclopramide	372	1521317	0.02%	101	273975	0.04%
05011100	07020251	Metronidazole And Tinidazole	Preparations For Other Vaginal Infections	285	1521317	0.02%	101	273975	0.04%
04070100	10020202	Non-Opioid And Compound Analgesics	Other Muscle Relaxants	197	1521317	0.01%	101	273975	0.04%
09010200	09060400	Drugs Used In Megaloblastic Anaemias	Vitamin D	172	1521317	0.01%	101	273975	0.04%
03010000	11040200	Bronchodilators	Other Anti-Inflammatory Eye Preparations (For The Eye)	161	1521317	0.01%	101	273975	0.04%
12020101	13090000	Corticosteroids Used In Nasal Allergy	Shampoos And Other Preparations For Scalp And Hair Conditions	151	1521317	0.01%	101	273975	0.04%
06020100	13090000	Thyroid Hormones	Shampoos And Other Preparations For Scalp And Hair Conditions	142	1521317	0.01%	101	273975	0.04%
04070200	06040102	Opioid Analgesics	Progestogens And Progesterone Receptor Modulators	141	1521317	0.01%	101	273975	0.04%
04010100	09060200	Hypnotics	Vitamin B Group	132	1521317	0.01%	101	273975	0.04%
04020102	04065400	Second-Generation Antipsychotic Drugs	Products Used Against Nausea And Vertigo - Antihistamines	114	1521317	0.01%	101	273975	0.04%
03010200	03030200	Antimuscarinic Bronchodilators	Leukotriene Receptor Antagonists	111	1521317	0.01%	101	273975	0.04%
06010101	12020101	Short-Acting Insulins	Corticosteroids Used In Nasal Allergy	111	1521317	0.01%	101	273975	0.04%
05010103	07020251	Broad-Spectrum Penicillins	Preparations For Other Vaginal Infections	260	1521317	0.02%	100	273975	0.04%
01010201	12010151	Compound Alginate Preparations	Anti-Inflammatory Preparations	220	1521317	0.01%	100	273975	0.04%
12020101	13060102	Corticosteroids Used In Nasal Allergy	Topical Antibacterials For Acne	204	1521317	0.01%	100	273975	0.04%
01020100	01020200	Antimuscarinics	Other Antispasmodics	195	1521317	0.01%	100	273975	0.04%
02040000	06040102	Beta-Adrenoceptor Blockers	Progestogens And Progesterone Receptor Modulators	155	1521317	0.01%	100	273975	0.04%
06020100	09060700	Thyroid Hormones	Multivitamin And Multimineral Preparations	151	1521317	0.01%	100	273975	0.04%
04010100	11040200	Hypnotics	Other Anti-Inflammatory Eye Preparations (For The Eye)	147	1521317	0.01%	100	273975	0.04%
05010500	06010101	Macrolides	Short-Acting Insulins	123	1521317	0.01%	100	273975	0.04%
06010101	13020102	Short-Acting Insulins	Emollient Skin Preparations	118	1521317	0.01%	100	273975	0.04%
03010101	07040250	Selective Beta 2 Agonists	Urinary Incontinence	114	1521317	0.01%	100	273975	0.04%
04030100	06010102	Tricyclic And Related Antidepressants	Intermediate- And Long-Acting Insulins	109	1521317	0.01%	100	273975	0.04%
04030400	10030250	Other Antidepressants	Topical Nsaids And Counter Irritants	107	1521317	0.01%	100	273975	0.04%
05010101	05011100	Benzylpenicillin And Phenoxymethylpenicillin	Metronidazole And Tinidazole	335	1521317	0.02%	99	273975	0.04%
06040103	12010151	Progestogen Products Doubling (In House Use)	Anti-Inflammatory Preparations	300	1521317	0.02%	99	273975	0.04%
05010500	12030100	Macrolides	Drugs For Oral Ulceration And Inflammation	280	1521317	0.02%	99	273975	0.04%
01070000	05010103	Local Products For Anal Or Rectal Problems	Broad-Spectrum Penicillins	262	1521317	0.02%	99	273975	0.04%
05011100	13020102	Metronidazole And Tinidazole	Emollient Skin Preparations	231	1521317	0.02%	99	273975	0.04%
06040103	09060400	Progestogen Products Doubling (In House Use)	Vitamin D	222	1521317	0.01%	99	273975	0.04%
13020100	13090000	Emollients	Shampoos And Other Preparations For Scalp And Hair Conditions	211	1521317	0.01%	99	273975	0.04%
01060100	04065500	Bulk-Forming Laxatives	Products Used Against Nausea And Vertigo - Domperidone & Metoclopramide	200	1521317	0.01%	99	273975	0.04%
04020000	06040103	Products Used In Psychoses And Related Disorders	Progestogen Products Doubling (In House Use)	176	1521317	0.01%	99	273975	0.04%
04020300	04080100	Products Used For Mania And Hypomania	Control Of Epilepsy	167	1521317	0.01%	99	273975	0.04%
01030100	09060400	H2-Receptor Antagonists	Vitamin D	158	1521317	0.01%	99	273975	0.04%
04010100	13100101	Hypnotics	Antibacterial Preparations Only Used Topically	145	1521317	0.01%	99	273975	0.04%
01020100	04070200	Antimuscarinics	Opioid Analgesics	144	1521317	0.01%	99	273975	0.04%
02050501	09010101	Angiotensin-Converting Enzyme Inhibitors (ACE Inhibitors)	Oral Iron	129	1521317	0.01%	99	273975	0.04%
06010101	09060400	Short-Acting Insulins	Vitamin D	120	1521317	0.01%	99	273975	0.04%
01050200	06010202	Corticosteroids In Chronic Bowel Problems	Biguanides (Metformin)	117	1521317	0.01%	99	273975	0.04%
03010000	04010201	Bronchodilators	Benzodiazepines	114	1521317	0.01%	99	273975	0.04%
02060200	02120400	Calcium-Channel Blockers	Statins	110	1521317	0.01%	99	273975	0.04%
01010201	09020102	Compound Alginate Preparations	Oral Sodium And Water	344	1521317	0.02%	98	273975	0.04%
05010102	12010151	Penicillinase-Resistant Penicillins	Anti-Inflammatory Preparations	254	1521317	0.02%	98	273975	0.04%
04065500	09060400	Products Used Against Nausea And Vertigo - Domperidone & Metoclopramide	Vitamin D	189	1521317	0.01%	98	273975	0.04%
06010202	06040103	Biguanides (Metformin)	Progestogen Products Doubling (In House Use)	148	1521317	0.01%	98	273975	0.04%
04070200	13100101	Opioid Analgesics	Antibacterial Preparations Only Used Topically	143	1521317	0.01%	98	273975	0.04%
04010201	10030250	Benzodiazepines	Topical Nsaids And Counter Irritants	140	1521317	0.01%	98	273975	0.04%
02090000	10010300	Antiplatelet Products	Drugs That Suppress The Rheumatic Disease Process	134	1521317	0.01%	98	273975	0.04%
01050300	09060400	Products Affecting The Immune Response In Chronic Bowel Problems	Vitamin D	128	1521317	0.01%	98	273975	0.04%
04070402	10010100	Prophylaxis Of Migraine	Non-Steroidal Anti-Inflammatory Drugs	122	1521317	0.01%	98	273975	0.04%
02020100	03010101	Thiazides And Related Diuretics	Selective Beta 2 Agonists	115	1521317	0.01%	98	273975	0.04%
03040101	04020000	Non-Sedating Antihistamines	Products Used In Psychoses And Related Disorders	113	1521317	0.01%	98	273975	0.04%
03010200	04030300	Antimuscarinic Bronchodilators	Selective Serotonin Re-Uptake Inhibitors (SSRI)	101	1521317	0.01%	98	273975	0.04%
05010103	13100400	Broad-Spectrum Penicillins	Parasiticidal Preparations (Topical)	272	1521317	0.02%	97	273975	0.04%
04065500	05010101	Products Used Against Nausea And Vertigo - Domperidone & Metoclopramide	Benzylpenicillin And Phenoxymethylpenicillin	270	1521317	0.02%	97	273975	0.04%
01060200	01070200	Stimulant Laxatives	Compound Haemorrhoid Products With Corticosteroids	263	1521317	0.02%	97	273975	0.04%
05011100	05011300	Metronidazole And Tinidazole	Urinary-Tract Infections	250	1521317	0.02%	97	273975	0.04%
01060100	04065400	Bulk-Forming Laxatives	Products Used Against Nausea And Vertigo - Antihistamines	230	1521317	0.02%	97	273975	0.04%
01060200	04065400	Stimulant Laxatives	Products Used Against Nausea And Vertigo - Antihistamines	217	1521317	0.01%	97	273975	0.04%
01030100	03040102	H2-Receptor Antagonists	Sedating Antihistamines	204	1521317	0.01%	97	273975	0.04%
04065400	05010300	Products Used Against Nausea And Vertigo - Antihistamines	Tetracyclines	193	1521317	0.01%	97	273975	0.04%
04020101	05010300	First-Generation Antipsychotic Drugs	Tetracyclines	188	1521317	0.01%	97	273975	0.04%
01020000	01020200	Antispasmodics And Products Affecting Motility	Other Antispasmodics	159	1521317	0.01%	97	273975	0.04%
01050200	04105100	Corticosteroids In Chronic Bowel Problems	Substance Dependence - Nicotine Dependence	156	1521317	0.01%	97	273975	0.04%
01070200	04030100	Compound Haemorrhoid Products With Corticosteroids	Tricyclic And Related Antidepressants	135	1521317	0.01%	97	273975	0.04%
04010201	13100101	Benzodiazepines	Antibacterial Preparations Only Used Topically	120	1521317	0.01%	97	273975	0.04%
01030500	03010200	Proton Pump Inhibitors	Antimuscarinic Bronchodilators	106	1521317	0.01%	97	273975	0.04%
02040000	04030000	Beta-Adrenoceptor Blockers	Antidepressants	105	1521317	0.01%	97	273975	0.04%
02060200	04070200	Calcium-Channel Blockers	Opioid Analgesics	105	1521317	0.01%	97	273975	0.04%
04020100	04060000	Antipsychotic Products	Products Used Against Nausea And Vertigo	397	1521317	0.03%	96	273975	0.04%
09060400	09060700	Vitamin D	Multivitamin And Multimineral Preparations	257	1521317	0.02%	96	273975	0.04%
05010201	05011200	Cephalosporins	Quinolones	243	1521317	0.02%	96	273975	0.04%
12030100	13040000	Drugs For Oral Ulceration And Inflammation	Topical Corticosteroids	229	1521317	0.02%	96	273975	0.04%
06010202	06040104	Biguanides (Metformin)	Selective Estrogen Receptor Modulators (Serms)	169	1521317	0.01%	96	273975	0.04%
03040101	12010151	Non-Sedating Antihistamines	Anti-Inflammatory Preparations	168	1521317	0.01%	96	273975	0.04%
04020000	09010101	Products Used In Psychoses And Related Disorders	Oral Iron	165	1521317	0.01%	96	273975	0.04%
03040101	09060700	Non-Sedating Antihistamines	Multivitamin And Multimineral Preparations	154	1521317	0.01%	96	273975	0.04%
04030300	12010300	Selective Serotonin Re-Uptake Inhibitors (SSRI)	Drugs Acting On The Ear - Removal Of Ear Wax	149	1521317	0.01%	96	273975	0.04%
01010101	03010101	Aluminium- And Magnesium- Containing Antacids	Selective Beta 2 Agonists	146	1521317	0.01%	96	273975	0.04%
01070200	04070200	Compound Haemorrhoid Products With Corticosteroids	Opioid Analgesics	138	1521317	0.01%	96	273975	0.04%
01060100	04010201	Bulk-Forming Laxatives	Benzodiazepines	132	1521317	0.01%	96	273975	0.04%
03020000	13090000	Corticosteroids (For Respiratory Conditions)	Shampoos And Other Preparations For Scalp And Hair Conditions	127	1521317	0.01%	96	273975	0.04%
04030100	11040200	Tricyclic And Related Antidepressants	Other Anti-Inflammatory Eye Preparations (For The Eye)	119	1521317	0.01%	96	273975	0.04%
04030400	13100101	Other Antidepressants	Antibacterial Preparations Only Used Topically	116	1521317	0.01%	96	273975	0.04%
05010500	13060102	Macrolides	Topical Antibacterials For Acne	291	1521317	0.02%	95	273975	0.03%
04020100	07020250	Antipsychotic Products	Preparations For Vaginal And Vulval Candidiasis	278	1521317	0.02%	95	273975	0.03%
04070100	09020100	Non-Opioid And Compound Analgesics	Oral Preparations For Fluid And Electrolyte Imbalance	214	1521317	0.01%	95	273975	0.03%
04060000	13020100	Products Used Against Nausea And Vertigo	Emollients	213	1521317	0.01%	95	273975	0.03%
01070200	03040101	Compound Haemorrhoid Products With Corticosteroids	Non-Sedating Antihistamines	188	1521317	0.01%	95	273975	0.03%
13020100	13090100	Emollients	Shampoos And Other Scalp Preparations	177	1521317	0.01%	95	273975	0.03%
01060300	01060400	Faecal Softeners	Osmotic Laxatives	171	1521317	0.01%	95	273975	0.03%
04010100	06040102	Hypnotics	Progestogens And Progesterone Receptor Modulators	158	1521317	0.01%	95	273975	0.03%
04030300	07030100	Selective Serotonin Re-Uptake Inhibitors (SSRI)	Combined Hormonal Contraceptives	157	1521317	0.01%	95	273975	0.03%
03020000	05020100	Corticosteroids (For Respiratory Conditions)	Triazole Antifungals	148	1521317	0.01%	95	273975	0.03%
03030200	05010500	Leukotriene Receptor Antagonists	Macrolides	137	1521317	0.01%	95	273975	0.03%
04010201	13020100	Benzodiazepines	Emollients	115	1521317	0.01%	95	273975	0.03%
02050501	07020250	Angiotensin-Converting Enzyme Inhibitors (ACE Inhibitors)	Preparations For Vaginal And Vulval Candidiasis	109	1521317	0.01%	95	273975	0.03%
04030400	13020100	Other Antidepressants	Emollients	107	1521317	0.01%	95	273975	0.03%
03040101	04070402	Non-Sedating Antihistamines	Prophylaxis Of Migraine	106	1521317	0.01%	95	273975	0.03%
04030400	06010101	Other Antidepressants	Short-Acting Insulins	95	1521317	0.01%	95	273975	0.03%
04065400	09060400	Products Used Against Nausea And Vertigo - Antihistamines	Vitamin D	224	1521317	0.01%	94	273975	0.03%
02090000	05010102	Antiplatelet Products	Penicillinase-Resistant Penicillins	218	1521317	0.01%	94	273975	0.03%
01070200	13020102	Compound Haemorrhoid Products With Corticosteroids	Emollient Skin Preparations	217	1521317	0.01%	94	273975	0.03%
13040000	13040400	Topical Corticosteroids	Potent Topical Corticosteroids	213	1521317	0.01%	94	273975	0.03%
03010101	13100400	Selective Beta 2 Agonists	Parasiticidal Preparations (Topical)	177	1521317	0.01%	94	273975	0.03%
09050101	09060400	Calcium Supplements	Vitamin D	176	1521317	0.01%	94	273975	0.03%
02080100	07020250	Parenteral Anticoagulants	Preparations For Vaginal And Vulval Candidiasis	174	1521317	0.01%	94	273975	0.03%
04010201	06040102	Benzodiazepines	Progestogens And Progesterone Receptor Modulators	145	1521317	0.01%	94	273975	0.03%
01010201	02050200	Compound Alginate Preparations	Centrally Acting Antihypertensive Products	143	1521317	0.01%	94	273975	0.03%
03010000	13020100	Bronchodilators	Emollients	139	1521317	0.01%	94	273975	0.03%
03020000	10030250	Corticosteroids (For Respiratory Conditions)	Topical Nsaids And Counter Irritants	127	1521317	0.01%	94	273975	0.03%
04030100	07040250	Tricyclic And Related Antidepressants	Urinary Incontinence	116	1521317	0.01%	94	273975	0.03%
05011300	06010102	Urinary-Tract Infections	Intermediate- And Long-Acting Insulins	109	1521317	0.01%	94	273975	0.03%
04070200	06010101	Opioid Analgesics	Short-Acting Insulins	104	1521317	0.01%	94	273975	0.03%
04030100	06010101	Tricyclic And Related Antidepressants	Short-Acting Insulins	100	1521317	0.01%	94	273975	0.03%
04030300	04105000	Selective Serotonin Re-Uptake Inhibitors (SSRI)	Substance Dependence - Alcohol Dependence	99	1521317	0.01%	94	273975	0.03%
03010101	06010400	Selective Beta 2 Agonists	Treatment Of Hypoglycaemia	98	1521317	0.01%	94	273975	0.03%
04020102	04070300	Second-Generation Antipsychotic Drugs	Neuropathic Pain	94	1521317	0.01%	94	273975	0.03%
04060000	09020102	Products Used Against Nausea And Vertigo	Oral Sodium And Water	355	1521317	0.02%	93	273975	0.03%
05010103	09020102	Broad-Spectrum Penicillins	Oral Sodium And Water	321	1521317	0.02%	93	273975	0.03%
09060700	10010100	Multivitamin And Multimineral Preparations	Non-Steroidal Anti-Inflammatory Drugs	183	1521317	0.01%	93	273975	0.03%
01060200	05011300	Stimulant Laxatives	Urinary-Tract Infections	167	1521317	0.01%	93	273975	0.03%
01060200	13020102	Stimulant Laxatives	Emollient Skin Preparations	152	1521317	0.01%	93	273975	0.03%
05020100	06020100	Triazole Antifungals	Thyroid Hormones	138	1521317	0.01%	93	273975	0.03%
06020100	12010151	Thyroid Hormones	Anti-Inflammatory Preparations	138	1521317	0.01%	93	273975	0.03%
05011300	06010101	Urinary-Tract Infections	Short-Acting Insulins	111	1521317	0.01%	93	273975	0.03%
10010100	12030100	Non-Steroidal Anti-Inflammatory Drugs	Drugs For Oral Ulceration And Inflammation	273	1521317	0.02%	92	273975	0.03%
05010101	05011300	Benzylpenicillin And Phenoxymethylpenicillin	Urinary-Tract Infections	255	1521317	0.02%	92	273975	0.03%
05010102	05011300	Penicillinase-Resistant Penicillins	Urinary-Tract Infections	245	1521317	0.02%	92	273975	0.03%
05010500	11040200	Macrolides	Other Anti-Inflammatory Eye Preparations (For The Eye)	195	1521317	0.01%	92	273975	0.03%
05020100	13020102	Triazole Antifungals	Emollient Skin Preparations	182	1521317	0.01%	92	273975	0.03%
07020250	13090100	Preparations For Vaginal And Vulval Candidiasis	Shampoos And Other Scalp Preparations	168	1521317	0.01%	92	273975	0.03%
01050100	13040000	Aminosalicylates	Topical Corticosteroids	136	1521317	0.01%	92	273975	0.03%
02020200	04070100	Loop Diuretics	Non-Opioid And Compound Analgesics	134	1521317	0.01%	92	273975	0.03%
01040200	03040102	Antimotility Products	Sedating Antihistamines	133	1521317	0.01%	92	273975	0.03%
03010300	05010103	Theophylline	Broad-Spectrum Penicillins	120	1521317	0.01%	92	273975	0.03%
04010201	09060700	Benzodiazepines	Multivitamin And Multimineral Preparations	116	1521317	0.01%	92	273975	0.03%
03010101	13040400	Selective Beta 2 Agonists	Potent Topical Corticosteroids	115	1521317	0.01%	92	273975	0.03%
04020102	04105100	Second-Generation Antipsychotic Drugs	Substance Dependence - Nicotine Dependence	104	1521317	0.01%	92	273975	0.03%
02120400	06010201	Statins	Sulphonylureas	104	1521317	0.01%	92	273975	0.03%
01060400	01070100	Osmotic Laxatives	Soothing Haemorrhoid Products	319	1521317	0.02%	91	273975	0.03%
04065400	04105100	Products Used Against Nausea And Vertigo - Antihistamines	Substance Dependence - Nicotine Dependence	230	1521317	0.02%	91	273975	0.03%
04105100	05011100	Substance Dependence - Nicotine Dependence	Metronidazole And Tinidazole	226	1521317	0.01%	91	273975	0.03%
05010103	09020100	Broad-Spectrum Penicillins	Oral Preparations For Fluid And Electrolyte Imbalance	226	1521317	0.01%	91	273975	0.03%
01060400	12010151	Osmotic Laxatives	Anti-Inflammatory Preparations	194	1521317	0.01%	91	273975	0.03%
05010103	13090100	Broad-Spectrum Penicillins	Shampoos And Other Scalp Preparations	184	1521317	0.01%	91	273975	0.03%
01030100	01040200	H2-Receptor Antagonists	Antimotility Products	152	1521317	0.01%	91	273975	0.03%
04070100	11040100	Non-Opioid And Compound Analgesics	Corticosteroids (In Eye Preparations)	152	1521317	0.01%	91	273975	0.03%
05010102	06010202	Penicillinase-Resistant Penicillins	Biguanides (Metformin)	145	1521317	0.01%	91	273975	0.03%
01030500	13020103	Proton Pump Inhibitors	Antimicrobial Emollients	140	1521317	0.01%	91	273975	0.03%
06020100	06040101	Thyroid Hormones	Oestrogens And HRT	134	1521317	0.01%	91	273975	0.03%
04070402	04080100	Prophylaxis Of Migraine	Control Of Epilepsy	109	1521317	0.01%	91	273975	0.03%
02040000	04070300	Beta-Adrenoceptor Blockers	Neuropathic Pain	104	1521317	0.01%	91	273975	0.03%
04020102	13020102	Second-Generation Antipsychotic Drugs	Emollient Skin Preparations	104	1521317	0.01%	91	273975	0.03%
02050501	04070200	Angiotensin-Converting Enzyme Inhibitors (ACE Inhibitors)	Opioid Analgesics	98	1521317	0.01%	91	273975	0.03%
05010103	13030000	Broad-Spectrum Penicillins	Topical Local Anaesthetics And Antipruritics	215	1521317	0.01%	90	273975	0.03%
13020101	13050200	Emollient Bath Additives And Shower Preparations	Preparations For Psoriasis	202	1521317	0.01%	90	273975	0.03%
01060400	11080100	Osmotic Laxatives	Tear Deficiency	150	1521317	0.01%	90	273975	0.03%
01050200	13020100	Corticosteroids In Chronic Bowel Problems	Emollients	130	1521317	0.01%	90	273975	0.03%
01020200	01050200	Other Antispasmodics	Corticosteroids In Chronic Bowel Problems	115	1521317	0.01%	90	273975	0.03%
04010201	09060400	Benzodiazepines	Vitamin D	108	1521317	0.01%	90	273975	0.03%
01010101	01010201	Aluminium- And Magnesium- Containing Antacids	Compound Alginate Preparations	283	1521317	0.02%	89	273975	0.03%
05010300	05010800	Tetracyclines	Sulphonamides And Trimethoprim	240	1521317	0.02%	89	273975	0.03%
04105100	05011300	Substance Dependence - Nicotine Dependence	Urinary-Tract Infections	228	1521317	0.01%	89	273975	0.03%
01070200	04060000	Compound Haemorrhoid Products With Corticosteroids	Products Used Against Nausea And Vertigo	213	1521317	0.01%	89	273975	0.03%
03010101	03090200	Selective Beta 2 Agonists	Demulcent And Expectorant Cough Preparations	190	1521317	0.01%	89	273975	0.03%
12020101	12500200	Corticosteroids Used In Nasal Allergy	Nasal Spray	180	1521317	0.01%	89	273975	0.03%
05011300	05020100	Urinary-Tract Infections	Triazole Antifungals	178	1521317	0.01%	89	273975	0.03%
07020250	11080100	Preparations For Vaginal And Vulval Candidiasis	Tear Deficiency	176	1521317	0.01%	89	273975	0.03%
01010201	11080100	Compound Alginate Preparations	Tear Deficiency	174	1521317	0.01%	89	273975	0.03%
13020103	71580200	Antimicrobial Emollients	Emollient Ointment	173	1521317	0.01%	89	273975	0.03%
01070000	03010101	Local Products For Anal Or Rectal Problems	Selective Beta 2 Agonists	137	1521317	0.01%	89	273975	0.03%
04020000	07020250	Products Used In Psychoses And Related Disorders	Preparations For Vaginal And Vulval Candidiasis	136	1521317	0.01%	89	273975	0.03%
01060400	02080100	Osmotic Laxatives	Parenteral Anticoagulants	135	1521317	0.01%	89	273975	0.03%
01070200	04010100	Compound Haemorrhoid Products With Corticosteroids	Hypnotics	134	1521317	0.01%	89	273975	0.03%
01040200	04070401	Antimotility Products	Acute Migraine	128	1521317	0.01%	89	273975	0.03%
03020000	09010200	Corticosteroids (For Respiratory Conditions)	Drugs Used In Megaloblastic Anaemias	116	1521317	0.01%	89	273975	0.03%
04070200	07040250	Opioid Analgesics	Urinary Incontinence	113	1521317	0.01%	89	273975	0.03%
04030300	13100102	Selective Serotonin Re-Uptake Inhibitors (SSRI)	Antibacterial Preparations Also Used Systemically (For Skin Conditions)	113	1521317	0.01%	89	273975	0.03%
04010100	04020300	Hypnotics	Products Used For Mania And Hypomania	101	1521317	0.01%	89	273975	0.03%
04020102	05010102	Second-Generation Antipsychotic Drugs	Penicillinase-Resistant Penicillins	101	1521317	0.01%	89	273975	0.03%
03020000	06010101	Corticosteroids (For Respiratory Conditions)	Short-Acting Insulins	98	1521317	0.01%	89	273975	0.03%
04105100	05010800	Substance Dependence - Nicotine Dependence	Sulphonamides And Trimethoprim	266	1521317	0.02%	88	273975	0.03%
03090100	04070100	Cough Suppressants	Non-Opioid And Compound Analgesics	247	1521317	0.02%	88	273975	0.03%
01060100	05010500	Bulk-Forming Laxatives	Macrolides	205	1521317	0.01%	88	273975	0.03%
06040102	13020102	Progestogens And Progesterone Receptor Modulators	Emollient Skin Preparations	190	1521317	0.01%	88	273975	0.03%
01060200	04065600	Stimulant Laxatives	Products Used Against Nausea And Vertigo - 5 HT3 Antagonists	189	1521317	0.01%	88	273975	0.03%
03040101	13040200	Non-Sedating Antihistamines	Mild Topical Corticosteroids	185	1521317	0.01%	88	273975	0.03%
04070100	12020300	Non-Opioid And Compound Analgesics	Nasal Preparations For Infection	172	1521317	0.01%	88	273975	0.03%
02060200	06040103	Calcium-Channel Blockers	Progestogen Products Doubling (In House Use)	159	1521317	0.01%	88	273975	0.03%
05010103	09060200	Broad-Spectrum Penicillins	Vitamin B Group	158	1521317	0.01%	88	273975	0.03%
04020101	11040200	First-Generation Antipsychotic Drugs	Other Anti-Inflammatory Eye Preparations (For The Eye)	156	1521317	0.01%	88	273975	0.03%
03010101	13030000	Selective Beta 2 Agonists	Topical Local Anaesthetics And Antipruritics	141	1521317	0.01%	88	273975	0.03%
05010800	06010202	Sulphonamides And Trimethoprim	Biguanides (Metformin)	128	1521317	0.01%	88	273975	0.03%
04030300	12020300	Selective Serotonin Re-Uptake Inhibitors (SSRI)	Nasal Preparations For Infection	128	1521317	0.01%	88	273975	0.03%
06020100	13020103	Thyroid Hormones	Antimicrobial Emollients	123	1521317	0.01%	88	273975	0.03%
01030500	04050100	Proton Pump Inhibitors	Anti-Obesity Products Acting On The Gastro-Intestinal Tract	122	1521317	0.01%	88	273975	0.03%
04010201	05020100	Benzodiazepines	Triazole Antifungals	121	1521317	0.01%	88	273975	0.03%
06010102	06010201	Intermediate- And Long-Acting Insulins	Sulphonylureas	120	1521317	0.01%	88	273975	0.03%
01050300	02090000	Products Affecting The Immune Response In Chronic Bowel Problems	Antiplatelet Products	113	1521317	0.01%	88	273975	0.03%
01060200	02040000	Stimulant Laxatives	Beta-Adrenoceptor Blockers	110	1521317	0.01%	88	273975	0.03%
03010300	03040101	Theophylline	Non-Sedating Antihistamines	110	1521317	0.01%	88	273975	0.03%
04030000	06040103	Antidepressants	Progestogen Products Doubling (In House Use)	107	1521317	0.01%	88	273975	0.03%
03010000	04030100	Bronchodilators	Tricyclic And Related Antidepressants	105	1521317	0.01%	88	273975	0.03%
02020100	06020100	Thiazides And Related Diuretics	Thyroid Hormones	100	1521317	0.01%	88	273975	0.03%
02120400	04030100	Statins	Tricyclic And Related Antidepressants	97	1521317	0.01%	88	273975	0.03%
02090000	04105100	Antiplatelet Products	Substance Dependence - Nicotine Dependence	205	1521317	0.01%	87	273975	0.03%
04060000	13060102	Products Used Against Nausea And Vertigo	Topical Antibacterials For Acne	200	1521317	0.01%	87	273975	0.03%
01010201	13020103	Compound Alginate Preparations	Antimicrobial Emollients	173	1521317	0.01%	87	273975	0.03%
01020200	04105100	Other Antispasmodics	Substance Dependence - Nicotine Dependence	160	1521317	0.01%	87	273975	0.03%
01020200	05010300	Other Antispasmodics	Tetracyclines	143	1521317	0.01%	87	273975	0.03%
01020200	02090000	Other Antispasmodics	Antiplatelet Products	123	1521317	0.01%	87	273975	0.03%
04030300	13040100	Selective Serotonin Re-Uptake Inhibitors (SSRI)	Topical Corticosteroids With Antimicrobials	117	1521317	0.01%	87	273975	0.03%
01060400	04020000	Osmotic Laxatives	Products Used In Psychoses And Related Disorders	115	1521317	0.01%	87	273975	0.03%
04030300	11040100	Selective Serotonin Re-Uptake Inhibitors (SSRI)	Corticosteroids (In Eye Preparations)	111	1521317	0.01%	87	273975	0.03%
03010200	03020000	Antimuscarinic Bronchodilators	Corticosteroids (For Respiratory Conditions)	110	1521317	0.01%	87	273975	0.03%
02120400	10010100	Statins	Non-Steroidal Anti-Inflammatory Drugs	108	1521317	0.01%	87	273975	0.03%
02120400	07020250	Statins	Preparations For Vaginal And Vulval Candidiasis	103	1521317	0.01%	87	273975	0.03%
05010103	12010300	Broad-Spectrum Penicillins	Drugs Acting On The Ear - Removal Of Ear Wax	329	1521317	0.02%	86	273975	0.03%
04020100	05010201	Antipsychotic Products	Cephalosporins	301	1521317	0.02%	86	273975	0.03%
05010101	11030100	Benzylpenicillin And Phenoxymethylpenicillin	Antibacterials (In Eye Preparation)	280	1521317	0.02%	86	273975	0.03%
07020250	13060100	Preparations For Vaginal And Vulval Candidiasis	Topical Preparations For Acne	252	1521317	0.02%	86	273975	0.03%
04020101	05011100	First-Generation Antipsychotic Drugs	Metronidazole And Tinidazole	242	1521317	0.02%	86	273975	0.03%
04060000	13100101	Products Used Against Nausea And Vertigo	Antibacterial Preparations Only Used Topically	222	1521317	0.01%	86	273975	0.03%
01060400	10030250	Osmotic Laxatives	Topical Nsaids And Counter Irritants	198	1521317	0.01%	86	273975	0.03%
01060200	05010800	Stimulant Laxatives	Sulphonamides And Trimethoprim	174	1521317	0.01%	86	273975	0.03%
01020000	01060400	Antispasmodics And Products Affecting Motility	Osmotic Laxatives	165	1521317	0.01%	86	273975	0.03%
01030500	13060102	Proton Pump Inhibitors	Topical Antibacterials For Acne	157	1521317	0.01%	86	273975	0.03%
02060200	10010100	Calcium-Channel Blockers	Non-Steroidal Anti-Inflammatory Drugs	122	1521317	0.01%	86	273975	0.03%
04060000	06010202	Products Used Against Nausea And Vertigo	Biguanides (Metformin)	121	1521317	0.01%	86	273975	0.03%
01050300	05010103	Products Affecting The Immune Response In Chronic Bowel Problems	Broad-Spectrum Penicillins	119	1521317	0.01%	86	273975	0.03%
04070300	06040103	Neuropathic Pain	Progestogen Products Doubling (In House Use)	116	1521317	0.01%	86	273975	0.03%
05011300	06010202	Urinary-Tract Infections	Biguanides (Metformin)	115	1521317	0.01%	86	273975	0.03%
03030200	04060000	Leukotriene Receptor Antagonists	Products Used Against Nausea And Vertigo	104	1521317	0.01%	86	273975	0.03%
04030400	11040200	Other Antidepressants	Other Anti-Inflammatory Eye Preparations (For The Eye)	101	1521317	0.01%	86	273975	0.03%
02120400	04070200	Statins	Opioid Analgesics	97	1521317	0.01%	86	273975	0.03%
03010200	04070100	Antimuscarinic Bronchodilators	Non-Opioid And Compound Analgesics	96	1521317	0.01%	86	273975	0.03%
04030400	07040250	Other Antidepressants	Urinary Incontinence	95	1521317	0.01%	86	273975	0.03%
03020000	06010102	Corticosteroids (For Respiratory Conditions)	Intermediate- And Long-Acting Insulins	94	1521317	0.01%	86	273975	0.03%
01020200	04020102	Other Antispasmodics	Second-Generation Antipsychotic Drugs	90	1521317	0.01%	86	273975	0.03%
05010800	05011200	Sulphonamides And Trimethoprim	Quinolones	262	1521317	0.02%	85	273975	0.03%
06040103	10030250	Progestogen Products Doubling (In House Use)	Topical Nsaids And Counter Irritants	237	1521317	0.02%	85	273975	0.03%
05010201	13060102	Cephalosporins	Topical Antibacterials For Acne	237	1521317	0.02%	85	273975	0.03%
10010100	12010151	Non-Steroidal Anti-Inflammatory Drugs	Anti-Inflammatory Preparations	228	1521317	0.01%	85	273975	0.03%
01010101	07020250	Aluminium- And Magnesium- Containing Antacids	Preparations For Vaginal And Vulval Candidiasis	226	1521317	0.01%	85	273975	0.03%
06040103	13020103	Progestogen Products Doubling (In House Use)	Antimicrobial Emollients	208	1521317	0.01%	85	273975	0.03%
03040102	05010800	Sedating Antihistamines	Sulphonamides And Trimethoprim	203	1521317	0.01%	85	273975	0.03%
03010101	03090100	Selective Beta 2 Agonists	Cough Suppressants	182	1521317	0.01%	85	273975	0.03%
04010100	04020100	Hypnotics	Antipsychotic Products	181	1521317	0.01%	85	273975	0.03%
04070100	07020251	Non-Opioid And Compound Analgesics	Preparations For Other Vaginal Infections	171	1521317	0.01%	85	273975	0.03%
02040000	06020200	Beta-Adrenoceptor Blockers	Antithyroid Products	161	1521317	0.01%	85	273975	0.03%
04070100	71580200	Non-Opioid And Compound Analgesics	Emollient Ointment	154	1521317	0.01%	85	273975	0.03%
04070300	13040000	Neuropathic Pain	Topical Corticosteroids	106	1521317	0.01%	85	273975	0.03%
01050200	08020200	Corticosteroids In Chronic Bowel Problems	Corticosteroids And Other Immunosuppressants	103	1521317	0.01%	85	273975	0.03%
05010300	13060100	Tetracyclines	Topical Preparations For Acne	282	1521317	0.02%	84	273975	0.03%
05020100	09010101	Triazole Antifungals	Oral Iron	242	1521317	0.02%	84	273975	0.03%
06040102	06040104	Progestogens And Progesterone Receptor Modulators	Selective Estrogen Receptor Modulators (Serms)	223	1521317	0.01%	84	273975	0.03%
06040103	09010200	Progestogen Products Doubling (In House Use)	Drugs Used In Megaloblastic Anaemias	211	1521317	0.01%	84	273975	0.03%
05010102	11040200	Penicillinase-Resistant Penicillins	Other Anti-Inflammatory Eye Preparations (For The Eye)	186	1521317	0.01%	84	273975	0.03%
04060000	05020100	Products Used Against Nausea And Vertigo	Triazole Antifungals	181	1521317	0.01%	84	273975	0.03%
01040200	05011100	Antimotility Products	Metronidazole And Tinidazole	171	1521317	0.01%	84	273975	0.03%
04070100	14040200	Non-Opioid And Compound Analgesics	Vaccines And Antisera - Influenza Vaccines	165	1521317	0.01%	84	273975	0.03%
04105100	13020100	Substance Dependence - Nicotine Dependence	Emollients	160	1521317	0.01%	84	273975	0.03%
01060200	05010500	Stimulant Laxatives	Macrolides	144	1521317	0.01%	84	273975	0.03%
02080100	13040000	Parenteral Anticoagulants	Topical Corticosteroids	142	1521317	0.01%	84	273975	0.03%
04050100	10010100	Anti-Obesity Products Acting On The Gastro-Intestinal Tract	Non-Steroidal Anti-Inflammatory Drugs	137	1521317	0.01%	84	273975	0.03%
11080100	13020102	Tear Deficiency	Emollient Skin Preparations	134	1521317	0.01%	84	273975	0.03%
02080100	02080200	Parenteral Anticoagulants	Oral Anticoagulants	125	1521317	0.01%	84	273975	0.03%
02080100	06010202	Parenteral Anticoagulants	Biguanides (Metformin)	125	1521317	0.01%	84	273975	0.03%
04070401	13020102	Acute Migraine	Emollient Skin Preparations	125	1521317	0.01%	84	273975	0.03%
01040200	09060400	Antimotility Products	Vitamin D	123	1521317	0.01%	84	273975	0.03%
01050100	09060400	Aminosalicylates	Vitamin D	122	1521317	0.01%	84	273975	0.03%
04010100	10030250	Hypnotics	Topical Nsaids And Counter Irritants	112	1521317	0.01%	84	273975	0.03%
02050501	10010100	Angiotensin-Converting Enzyme Inhibitors (ACE Inhibitors)	Non-Steroidal Anti-Inflammatory Drugs	107	1521317	0.01%	84	273975	0.03%
02040000	04070402	Beta-Adrenoceptor Blockers	Prophylaxis Of Migraine	103	1521317	0.01%	84	273975	0.03%
04010201	13020101	Benzodiazepines	Emollient Bath Additives And Shower Preparations	98	1521317	0.01%	84	273975	0.03%
04070100	12010300	Non-Opioid And Compound Analgesics	Drugs Acting On The Ear - Removal Of Ear Wax	246	1521317	0.02%	83	273975	0.03%
04065400	05011100	Products Used Against Nausea And Vertigo - Antihistamines	Metronidazole And Tinidazole	223	1521317	0.01%	83	273975	0.03%
01010101	01030500	Aluminium- And Magnesium- Containing Antacids	Proton Pump Inhibitors	188	1521317	0.01%	83	273975	0.03%
01020000	10010100	Antispasmodics And Products Affecting Motility	Non-Steroidal Anti-Inflammatory Drugs	168	1521317	0.01%	83	273975	0.03%
13020100	13050200	Emollients	Preparations For Psoriasis	163	1521317	0.01%	83	273975	0.03%
05010103	07040250	Broad-Spectrum Penicillins	Urinary Incontinence	133	1521317	0.01%	83	273975	0.03%
04050100	13040000	Anti-Obesity Products Acting On The Gastro-Intestinal Tract	Topical Corticosteroids	133	1521317	0.01%	83	273975	0.03%
03010000	03030200	Bronchodilators	Leukotriene Receptor Antagonists	127	1521317	0.01%	83	273975	0.03%
03010101	11040100	Selective Beta 2 Agonists	Corticosteroids (In Eye Preparations)	122	1521317	0.01%	83	273975	0.03%
01010201	02060200	Compound Alginate Preparations	Calcium-Channel Blockers	116	1521317	0.01%	83	273975	0.03%
01030100	06010202	H2-Receptor Antagonists	Biguanides (Metformin)	112	1521317	0.01%	83	273975	0.03%
01010201	04020000	Compound Alginate Preparations	Products Used In Psychoses And Related Disorders	109	1521317	0.01%	83	273975	0.03%
04070300	12020101	Neuropathic Pain	Corticosteroids Used In Nasal Allergy	97	1521317	0.01%	83	273975	0.03%
02090000	04020102	Antiplatelet Products	Second-Generation Antipsychotic Drugs	85	1521317	0.01%	83	273975	0.03%
05011200	06040103	Quinolones	Progestogen Products Doubling (In House Use)	281	1521317	0.02%	82	273975	0.03%
04065500	09020100	Products Used Against Nausea And Vertigo - Domperidone & Metoclopramide	Oral Preparations For Fluid And Electrolyte Imbalance	233	1521317	0.02%	82	273975	0.03%
09010101	10030250	Oral Iron	Topical Nsaids And Counter Irritants	233	1521317	0.02%	82	273975	0.03%
13020102	13060102	Emollient Skin Preparations	Topical Antibacterials For Acne	204	1521317	0.01%	82	273975	0.03%
13020102	13040100	Emollient Skin Preparations	Topical Corticosteroids With Antimicrobials	201	1521317	0.01%	82	273975	0.03%
01010201	09050101	Compound Alginate Preparations	Calcium Supplements	191	1521317	0.01%	82	273975	0.03%
01060400	13020103	Osmotic Laxatives	Antimicrobial Emollients	168	1521317	0.01%	82	273975	0.03%
05010201	09010200	Cephalosporins	Drugs Used In Megaloblastic Anaemias	167	1521317	0.01%	82	273975	0.03%
01070200	04020101	Compound Haemorrhoid Products With Corticosteroids	First-Generation Antipsychotic Drugs	166	1521317	0.01%	82	273975	0.03%
05010800	11040200	Sulphonamides And Trimethoprim	Other Anti-Inflammatory Eye Preparations (For The Eye)	154	1521317	0.01%	82	273975	0.03%
01030500	05011200	Proton Pump Inhibitors	Quinolones	149	1521317	0.01%	82	273975	0.03%
04070401	05010500	Acute Migraine	Macrolides	135	1521317	0.01%	82	273975	0.03%
01070200	02040000	Compound Haemorrhoid Products With Corticosteroids	Beta-Adrenoceptor Blockers	134	1521317	0.01%	82	273975	0.03%
04030100	05020100	Tricyclic And Related Antidepressants	Triazole Antifungals	131	1521317	0.01%	82	273975	0.03%
03020000	12010151	Corticosteroids (For Respiratory Conditions)	Anti-Inflammatory Preparations	125	1521317	0.01%	82	273975	0.03%
02050502	02060200	Angiotensin-II Receptor Antagonists	Calcium-Channel Blockers	120	1521317	0.01%	82	273975	0.03%
04070200	09060700	Opioid Analgesics	Multivitamin And Multimineral Preparations	116	1521317	0.01%	82	273975	0.03%
05020100	06010102	Triazole Antifungals	Intermediate- And Long-Acting Insulins	113	1521317	0.01%	82	273975	0.03%
05020100	06010101	Triazole Antifungals	Short-Acting Insulins	112	1521317	0.01%	82	273975	0.03%
02050501	13040000	Angiotensin-Converting Enzyme Inhibitors (ACE Inhibitors)	Topical Corticosteroids	104	1521317	0.01%	82	273975	0.03%
06010102	09060400	Intermediate- And Long-Acting Insulins	Vitamin D	101	1521317	0.01%	82	273975	0.03%
06020100	06030200	Thyroid Hormones	Glucocorticoid Therapy	99	1521317	0.01%	82	273975	0.03%
04010100	06010202	Hypnotics	Biguanides (Metformin)	98	1521317	0.01%	82	273975	0.03%
04030400	11030100	Other Antidepressants	Antibacterials (In Eye Preparation)	98	1521317	0.01%	82	273975	0.03%
01030100	03030200	H2-Receptor Antagonists	Leukotriene Receptor Antagonists	97	1521317	0.01%	82	273975	0.03%
04030400	09010200	Other Antidepressants	Drugs Used In Megaloblastic Anaemias	97	1521317	0.01%	82	273975	0.03%
01050300	03010101	Products Affecting The Immune Response In Chronic Bowel Problems	Selective Beta 2 Agonists	86	1521317	0.01%	82	273975	0.03%
04105100	05010101	Substance Dependence - Nicotine Dependence	Benzylpenicillin And Phenoxymethylpenicillin	250	1521317	0.02%	81	273975	0.03%
05010103	14040200	Broad-Spectrum Penicillins	Vaccines And Antisera - Influenza Vaccines	206	1521317	0.01%	81	273975	0.03%
05010103	71580200	Broad-Spectrum Penicillins	Emollient Ointment	172	1521317	0.01%	81	273975	0.03%
03040102	04105100	Sedating Antihistamines	Substance Dependence - Nicotine Dependence	171	1521317	0.01%	81	273975	0.03%
01040200	04105100	Antimotility Products	Substance Dependence - Nicotine Dependence	142	1521317	0.01%	81	273975	0.03%
06020100	13060102	Thyroid Hormones	Topical Antibacterials For Acne	139	1521317	0.01%	81	273975	0.03%
01020000	04060000	Antispasmodics And Products Affecting Motility	Products Used Against Nausea And Vertigo	135	1521317	0.01%	81	273975	0.03%
01030500	10010300	Proton Pump Inhibitors	Drugs That Suppress The Rheumatic Disease Process	118	1521317	0.01%	81	273975	0.03%
04030100	13100101	Tricyclic And Related Antidepressants	Antibacterial Preparations Only Used Topically	104	1521317	0.01%	81	273975	0.03%
02020200	02040000	Loop Diuretics	Beta-Adrenoceptor Blockers	96	1521317	0.01%	81	273975	0.03%
02050502	04070100	Angiotensin-II Receptor Antagonists	Non-Opioid And Compound Analgesics	93	1521317	0.01%	81	273975	0.03%
02040000	04020000	Beta-Adrenoceptor Blockers	Products Used In Psychoses And Related Disorders	90	1521317	0.01%	81	273975	0.03%
03010101	04020300	Selective Beta 2 Agonists	Products Used For Mania And Hypomania	90	1521317	0.01%	81	273975	0.03%
02050502	02120400	Angiotensin-II Receptor Antagonists	Statins	89	1521317	0.01%	81	273975	0.03%
[truncated: 23,753 more rows]

## Sheet: AllTrimester
Medications prescribed in pairs				All Pregnancies			Pregnancies of women with active multimorbidity
(BNF chapter and section)		Description		Numerator	Denominator	Estimated prescription percentage	Numerator	Denominator	Estimated prescription percentage
Drug 1	Drug 2	Drug1	Drug 2
01010201	09010101	Compound Alginate Preparations	Oral Iron	57835	1521317	3.80%	13424	273975	4.90%
05010103	09010101	Broad-Spectrum Penicillins	Oral Iron	53809	1521317	3.54%	13181	273975	4.81%
03010101	03020000	Selective Beta 2 Agonists	Corticosteroids (For Respiratory Conditions)	26709	1521317	1.76%	12583	273975	4.59%
05010103	07020250	Broad-Spectrum Penicillins	Preparations For Vaginal And Vulval Candidiasis	43013	1521317	2.83%	12273	273975	4.48%
07020250	09010101	Preparations For Vaginal And Vulval Candidiasis	Oral Iron	51495	1521317	3.38%	12182	273975	4.45%
04070100	05010103	Non-Opioid And Compound Analgesics	Broad-Spectrum Penicillins	34509	1521317	2.27%	11525	273975	4.21%
03010101	05010103	Selective Beta 2 Agonists	Broad-Spectrum Penicillins	24235	1521317	1.59%	11286	273975	4.12%
04070100	09010101	Non-Opioid And Compound Analgesics	Oral Iron	37875	1521317	2.49%	10948	273975	4.00%
01010201	05010103	Compound Alginate Preparations	Broad-Spectrum Penicillins	37740	1521317	2.48%	10866	273975	3.97%
01010201	07020250	Compound Alginate Preparations	Preparations For Vaginal And Vulval Candidiasis	37934	1521317	2.49%	10465	273975	3.82%
01010201	04070100	Compound Alginate Preparations	Non-Opioid And Compound Analgesics	30905	1521317	2.03%	10198	273975	3.72%
04030300	09010101	Selective Serotonin Re-Uptake Inhibitors (SSRI)	Oral Iron	14945	1521317	0.98%	9183	273975	3.35%
04070100	07020250	Non-Opioid And Compound Analgesics	Preparations For Vaginal And Vulval Candidiasis	26519	1521317	1.74%	9005	273975	3.29%
04030300	04070100	Selective Serotonin Re-Uptake Inhibitors (SSRI)	Non-Opioid And Compound Analgesics	12954	1521317	0.85%	8982	273975	3.28%
04030300	05010103	Selective Serotonin Re-Uptake Inhibitors (SSRI)	Broad-Spectrum Penicillins	13161	1521317	0.87%	8652	273975	3.16%
03010101	09010101	Selective Beta 2 Agonists	Oral Iron	18927	1521317	1.24%	8477	273975	3.09%
03010101	04070100	Selective Beta 2 Agonists	Non-Opioid And Compound Analgesics	13677	1521317	0.90%	7760	273975	2.83%
01010201	03010101	Compound Alginate Preparations	Selective Beta 2 Agonists	15774	1521317	1.04%	7757	273975	2.83%
03010101	07020250	Selective Beta 2 Agonists	Preparations For Vaginal And Vulval Candidiasis	14576	1521317	0.96%	7311	273975	2.67%
04030300	07020250	Selective Serotonin Re-Uptake Inhibitors (SSRI)	Preparations For Vaginal And Vulval Candidiasis	11068	1521317	0.73%	7211	273975	2.63%
01010201	04030300	Compound Alginate Preparations	Selective Serotonin Re-Uptake Inhibitors (SSRI)	10348	1521317	0.68%	6809	273975	2.49%
01060400	09010101	Osmotic Laxatives	Oral Iron	24235	1521317	1.59%	6774	273975	2.47%
09010101	13040000	Oral Iron	Topical Corticosteroids	23175	1521317	1.52%	6717	273975	2.45%
03010101	04030300	Selective Beta 2 Agonists	Selective Serotonin Re-Uptake Inhibitors (SSRI)	7816	1521317	0.51%	6497	273975	2.37%
05010103	13040000	Broad-Spectrum Penicillins	Topical Corticosteroids	17719	1521317	1.16%	6265	273975	2.29%
07020250	13040000	Preparations For Vaginal And Vulval Candidiasis	Topical Corticosteroids	19493	1521317	1.28%	6257	273975	2.28%
01010201	01060400	Compound Alginate Preparations	Osmotic Laxatives	19572	1521317	1.29%	6131	273975	2.24%
13020102	13040000	Emollient Skin Preparations	Topical Corticosteroids	17783	1521317	1.17%	6129	273975	2.24%
03010101	13040000	Selective Beta 2 Agonists	Topical Corticosteroids	10334	1521317	0.68%	6052	273975	2.21%
05010201	07020250	Cephalosporins	Preparations For Vaginal And Vulval Candidiasis	20588	1521317	1.35%	5830	273975	2.13%
05010103	05010201	Broad-Spectrum Penicillins	Cephalosporins	20525	1521317	1.35%	5803	273975	2.12%
01010201	13040000	Compound Alginate Preparations	Topical Corticosteroids	17288	1521317	1.14%	5762	273975	2.10%
01060400	04070100	Osmotic Laxatives	Non-Opioid And Compound Analgesics	14961	1521317	0.98%	5614	273975	2.05%
05010201	09010101	Cephalosporins	Oral Iron	22357	1521317	1.47%	5487	273975	2.00%
01060400	05010103	Osmotic Laxatives	Broad-Spectrum Penicillins	15864	1521317	1.04%	5348	273975	1.95%
01060400	07020250	Osmotic Laxatives	Preparations For Vaginal And Vulval Candidiasis	16082	1521317	1.06%	5229	273975	1.91%
03010101	12020101	Selective Beta 2 Agonists	Corticosteroids Used In Nasal Allergy	8430	1521317	0.55%	5210	273975	1.90%
04070100	13040000	Non-Opioid And Compound Analgesics	Topical Corticosteroids	12952	1521317	0.85%	5184	273975	1.89%
03020000	05010103	Corticosteroids (For Respiratory Conditions)	Broad-Spectrum Penicillins	10570	1521317	0.69%	5077	273975	1.85%
04070100	05010201	Non-Opioid And Compound Analgesics	Cephalosporins	14284	1521317	0.94%	4712	273975	1.72%
01010201	05010201	Compound Alginate Preparations	Cephalosporins	15979	1521317	1.05%	4669	273975	1.70%
01030500	04070100	Proton Pump Inhibitors	Non-Opioid And Compound Analgesics	8529	1521317	0.56%	4612	273975	1.68%
04070100	10010100	Non-Opioid And Compound Analgesics	Non-Steroidal Anti-Inflammatory Drugs	12299	1521317	0.81%	4495	273975	1.64%
05010103	12020101	Broad-Spectrum Penicillins	Corticosteroids Used In Nasal Allergy	11110	1521317	0.73%	4448	273975	1.62%
03010101	03040101	Selective Beta 2 Agonists	Non-Sedating Antihistamines	6643	1521317	0.44%	4301	273975	1.57%
06010101	06010102	Short-Acting Insulins	Intermediate- And Long-Acting Insulins	6759	1521317	0.44%	4260	273975	1.55%
04030300	13040000	Selective Serotonin Re-Uptake Inhibitors (SSRI)	Topical Corticosteroids	6062	1521317	0.40%	4187	273975	1.53%
01050200	03010101	Corticosteroids In Chronic Bowel Problems	Selective Beta 2 Agonists	7186	1521317	0.47%	4059	273975	1.48%
09010101	12020101	Oral Iron	Corticosteroids Used In Nasal Allergy	11023	1521317	0.72%	3972	273975	1.45%
03020000	09010101	Corticosteroids (For Respiratory Conditions)	Oral Iron	8584	1521317	0.56%	3969	273975	1.45%
01010201	01030500	Compound Alginate Preparations	Proton Pump Inhibitors	9221	1521317	0.61%	3954	273975	1.44%
01030500	04030300	Proton Pump Inhibitors	Selective Serotonin Re-Uptake Inhibitors (SSRI)	5004	1521317	0.33%	3949	273975	1.44%
01060400	04030300	Osmotic Laxatives	Selective Serotonin Re-Uptake Inhibitors (SSRI)	5409	1521317	0.36%	3795	273975	1.39%
01010201	03020000	Compound Alginate Preparations	Corticosteroids (For Respiratory Conditions)	7336	1521317	0.48%	3738	273975	1.36%
01010201	12020101	Compound Alginate Preparations	Corticosteroids Used In Nasal Allergy	9339	1521317	0.61%	3732	273975	1.36%
04070100	04070200	Non-Opioid And Compound Analgesics	Opioid Analgesics	6432	1521317	0.42%	3684	273975	1.34%
01030500	09010101	Proton Pump Inhibitors	Oral Iron	8305	1521317	0.55%	3634	273975	1.33%
03010101	05010201	Selective Beta 2 Agonists	Cephalosporins	7044	1521317	0.46%	3517	273975	1.28%
04060000	09010101	Products Used Against Nausea And Vertigo	Oral Iron	11775	1521317	0.77%	3513	273975	1.28%
11040200	12020101	Other Anti-Inflammatory Eye Preparations (For The Eye)	Corticosteroids Used In Nasal Allergy	10447	1521317	0.69%	3503	273975	1.28%
01030500	05010103	Proton Pump Inhibitors	Broad-Spectrum Penicillins	7298	1521317	0.48%	3491	273975	1.27%
06020100	09010101	Thyroid Hormones	Oral Iron	5967	1521317	0.39%	3471	273975	1.27%
04010100	04030300	Hypnotics	Selective Serotonin Re-Uptake Inhibitors (SSRI)	4990	1521317	0.33%	3468	273975	1.27%
01060400	03010101	Osmotic Laxatives	Selective Beta 2 Agonists	6154	1521317	0.40%	3444	273975	1.26%
03040101	12020101	Non-Sedating Antihistamines	Corticosteroids Used In Nasal Allergy	6866	1521317	0.45%	3426	273975	1.25%
04030300	06040103	Selective Serotonin Re-Uptake Inhibitors (SSRI)	Progestogen Products Doubling (In House Use)	6469	1521317	0.43%	3421	273975	1.25%
03010101	13020102	Selective Beta 2 Agonists	Emollient Skin Preparations	5653	1521317	0.37%	3421	273975	1.25%
09010101	13020102	Oral Iron	Emollient Skin Preparations	11545	1521317	0.76%	3418	273975	1.25%
03020000	07020250	Corticosteroids (For Respiratory Conditions)	Preparations For Vaginal And Vulval Candidiasis	6706	1521317	0.44%	3383	273975	1.23%
03020000	04070100	Corticosteroids (For Respiratory Conditions)	Non-Opioid And Compound Analgesics	5787	1521317	0.38%	3336	273975	1.22%
04060000	05010103	Products Used Against Nausea And Vertigo	Broad-Spectrum Penicillins	9252	1521317	0.61%	3307	273975	1.21%
07020250	12020101	Preparations For Vaginal And Vulval Candidiasis	Corticosteroids Used In Nasal Allergy	7993	1521317	0.53%	3296	273975	1.20%
04030300	05010201	Selective Serotonin Re-Uptake Inhibitors (SSRI)	Cephalosporins	5147	1521317	0.34%	3296	273975	1.20%
04070100	12020101	Non-Opioid And Compound Analgesics	Corticosteroids Used In Nasal Allergy	6929	1521317	0.46%	3242	273975	1.18%
04030300	04060000	Selective Serotonin Re-Uptake Inhibitors (SSRI)	Products Used Against Nausea And Vertigo	4609	1521317	0.30%	3210	273975	1.17%
01010201	01030100	Compound Alginate Preparations	H2-Receptor Antagonists	9155	1521317	0.60%	3175	273975	1.16%
01050200	05010103	Corticosteroids In Chronic Bowel Problems	Broad-Spectrum Penicillins	5950	1521317	0.39%	3163	273975	1.15%
04060000	04070100	Products Used Against Nausea And Vertigo	Non-Opioid And Compound Analgesics	7716	1521317	0.51%	3145	273975	1.15%
04010201	04030300	Benzodiazepines	Selective Serotonin Re-Uptake Inhibitors (SSRI)	4046	1521317	0.27%	3093	273975	1.13%
01030500	03010101	Proton Pump Inhibitors	Selective Beta 2 Agonists	4419	1521317	0.29%	3073	273975	1.12%
05010103	13020102	Broad-Spectrum Penicillins	Emollient Skin Preparations	8338	1521317	0.55%	3041	273975	1.11%
01010201	13020102	Compound Alginate Preparations	Emollient Skin Preparations	8830	1521317	0.58%	2966	273975	1.08%
07020250	13020102	Preparations For Vaginal And Vulval Candidiasis	Emollient Skin Preparations	8541	1521317	0.56%	2931	273975	1.07%
01060400	13040000	Osmotic Laxatives	Topical Corticosteroids	7559	1521317	0.50%	2892	273975	1.06%
04030100	04070100	Tricyclic And Related Antidepressants	Non-Opioid And Compound Analgesics	4456	1521317	0.29%	2891	273975	1.06%
01010201	04060000	Compound Alginate Preparations	Products Used Against Nausea And Vertigo	8581	1521317	0.56%	2884	273975	1.05%
03010101	05010500	Selective Beta 2 Agonists	Macrolides	5329	1521317	0.35%	2810	273975	1.03%
01030500	07020250	Proton Pump Inhibitors	Preparations For Vaginal And Vulval Candidiasis	5811	1521317	0.38%	2778	273975	1.01%
03020000	13040000	Corticosteroids (For Respiratory Conditions)	Topical Corticosteroids	4771	1521317	0.31%	2754	273975	1.01%
03040101	05010103	Non-Sedating Antihistamines	Broad-Spectrum Penicillins	6007	1521317	0.39%	2748	273975	1.00%
13020100	13040000	Emollients	Topical Corticosteroids	8420	1521317	0.55%	2741	273975	1.00%
03040101	13040000	Non-Sedating Antihistamines	Topical Corticosteroids	6016	1521317	0.40%	2730	273975	1.00%
03040101	04070100	Non-Sedating Antihistamines	Non-Opioid And Compound Analgesics	5158	1521317	0.34%	2706	273975	0.99%
05010102	05010103	Penicillinase-Resistant Penicillins	Broad-Spectrum Penicillins	7862	1521317	0.52%	2688	273975	0.98%
13020101	13040000	Emollient Bath Additives And Shower Preparations	Topical Corticosteroids	6493	1521317	0.43%	2668	273975	0.97%
04060000	07020250	Products Used Against Nausea And Vertigo	Preparations For Vaginal And Vulval Candidiasis	7613	1521317	0.50%	2659	273975	0.97%
03020000	04030300	Corticosteroids (For Respiratory Conditions)	Selective Serotonin Re-Uptake Inhibitors (SSRI)	3187	1521317	0.21%	2659	273975	0.97%
04070100	05010500	Non-Opioid And Compound Analgesics	Macrolides	6425	1521317	0.42%	2630	273975	0.96%
04070100	13020102	Non-Opioid And Compound Analgesics	Emollient Skin Preparations	6502	1521317	0.43%	2599	273975	0.95%
05010103	06020100	Broad-Spectrum Penicillins	Thyroid Hormones	4053	1521317	0.27%	2575	273975	0.94%
03040101	09010101	Non-Sedating Antihistamines	Oral Iron	6621	1521317	0.44%	2569	273975	0.94%
01040200	04070100	Antimotility Products	Non-Opioid And Compound Analgesics	5829	1521317	0.38%	2560	273975	0.93%
04010201	04070100	Benzodiazepines	Non-Opioid And Compound Analgesics	4146	1521317	0.27%	2537	273975	0.93%
01030100	09010101	H2-Receptor Antagonists	Oral Iron	7445	1521317	0.49%	2516	273975	0.92%
03040101	04030300	Non-Sedating Antihistamines	Selective Serotonin Re-Uptake Inhibitors (SSRI)	3222	1521317	0.21%	2506	273975	0.91%
12020101	13040000	Corticosteroids Used In Nasal Allergy	Topical Corticosteroids	5148	1521317	0.34%	2504	273975	0.91%
02040000	04030300	Beta-Adrenoceptor Blockers	Selective Serotonin Re-Uptake Inhibitors (SSRI)	3350	1521317	0.22%	2499	273975	0.91%
05010201	13040000	Cephalosporins	Topical Corticosteroids	7114	1521317	0.47%	2494	273975	0.91%
05010103	10010100	Broad-Spectrum Penicillins	Non-Steroidal Anti-Inflammatory Drugs	7084	1521317	0.47%	2484	273975	0.91%
03020000	12020101	Corticosteroids (For Respiratory Conditions)	Corticosteroids Used In Nasal Allergy	3919	1521317	0.26%	2474	273975	0.90%
02090000	09010101	Antiplatelet Products	Oral Iron	6755	1521317	0.44%	2455	273975	0.90%
04010100	04070100	Hypnotics	Non-Opioid And Compound Analgesics	4142	1521317	0.27%	2445	273975	0.89%
01070200	09010101	Compound Haemorrhoid Products With Corticosteroids	Oral Iron	9173	1521317	0.60%	2444	273975	0.89%
01060400	05010201	Osmotic Laxatives	Cephalosporins	7063	1521317	0.46%	2428	273975	0.89%
01010201	03040101	Compound Alginate Preparations	Non-Sedating Antihistamines	5342	1521317	0.35%	2375	273975	0.87%
05010103	05010500	Broad-Spectrum Penicillins	Macrolides	6859	1521317	0.45%	2372	273975	0.87%
01060400	01070200	Osmotic Laxatives	Compound Haemorrhoid Products With Corticosteroids	8093	1521317	0.53%	2366	273975	0.86%
01010201	01070200	Compound Alginate Preparations	Compound Haemorrhoid Products With Corticosteroids	7910	1521317	0.52%	2361	273975	0.86%
04030300	12020101	Selective Serotonin Re-Uptake Inhibitors (SSRI)	Corticosteroids Used In Nasal Allergy	3042	1521317	0.20%	2360	273975	0.86%
05011300	07020250	Urinary-Tract Infections	Preparations For Vaginal And Vulval Candidiasis	7311	1521317	0.48%	2358	273975	0.86%
05010500	09010101	Macrolides	Oral Iron	7841	1521317	0.52%	2357	273975	0.86%
04030300	10010100	Selective Serotonin Re-Uptake Inhibitors (SSRI)	Non-Steroidal Anti-Inflammatory Drugs	3496	1521317	0.23%	2354	273975	0.86%
04030300	04070200	Selective Serotonin Re-Uptake Inhibitors (SSRI)	Opioid Analgesics	2892	1521317	0.19%	2351	273975	0.86%
05010500	07020250	Macrolides	Preparations For Vaginal And Vulval Candidiasis	6860	1521317	0.45%	2331	273975	0.85%
05010103	05011300	Broad-Spectrum Penicillins	Urinary-Tract Infections	7519	1521317	0.49%	2318	273975	0.85%
04020101	09010101	First-Generation Antipsychotic Drugs	Oral Iron	7617	1521317	0.50%	2312	273975	0.84%
01030100	04070100	H2-Receptor Antagonists	Non-Opioid And Compound Analgesics	5314	1521317	0.35%	2291	273975	0.84%
13020101	13020102	Emollient Bath Additives And Shower Preparations	Emollient Skin Preparations	5960	1521317	0.39%	2274	273975	0.83%
01030100	05010103	H2-Receptor Antagonists	Broad-Spectrum Penicillins	5814	1521317	0.38%	2266	273975	0.83%
03010101	04060000	Selective Beta 2 Agonists	Products Used Against Nausea And Vertigo	3924	1521317	0.26%	2246	273975	0.82%
01070200	07020250	Compound Haemorrhoid Products With Corticosteroids	Preparations For Vaginal And Vulval Candidiasis	7665	1521317	0.50%	2245	273975	0.82%
04020101	05010103	First-Generation Antipsychotic Drugs	Broad-Spectrum Penicillins	6180	1521317	0.41%	2243	273975	0.82%
04030400	04070100	Other Antidepressants	Non-Opioid And Compound Analgesics	2731	1521317	0.18%	2237	273975	0.82%
04030300	06020100	Selective Serotonin Re-Uptake Inhibitors (SSRI)	Thyroid Hormones	2432	1521317	0.16%	2231	273975	0.81%
04070100	06040103	Non-Opioid And Compound Analgesics	Progestogen Products Doubling (In House Use)	6921	1521317	0.45%	2223	273975	0.81%
04020101	04070100	First-Generation Antipsychotic Drugs	Non-Opioid And Compound Analgesics	5508	1521317	0.36%	2205	273975	0.80%
05011300	09010101	Urinary-Tract Infections	Oral Iron	7838	1521317	0.52%	2204	273975	0.80%
01010201	05010500	Compound Alginate Preparations	Macrolides	6067	1521317	0.40%	2203	273975	0.80%
03040102	09010101	Sedating Antihistamines	Oral Iron	7394	1521317	0.49%	2195	273975	0.80%
05010102	09010101	Penicillinase-Resistant Penicillins	Oral Iron	8176	1521317	0.54%	2187	273975	0.80%
05010102	07020250	Penicillinase-Resistant Penicillins	Preparations For Vaginal And Vulval Candidiasis	7282	1521317	0.48%	2181	273975	0.80%
05010103	06040103	Broad-Spectrum Penicillins	Progestogen Products Doubling (In House Use)	8759	1521317	0.58%	2168	273975	0.79%
03040101	07020250	Non-Sedating Antihistamines	Preparations For Vaginal And Vulval Candidiasis	4917	1521317	0.32%	2157	273975	0.79%
06020100	07020250	Thyroid Hormones	Preparations For Vaginal And Vulval Candidiasis	3461	1521317	0.23%	2149	273975	0.78%
09010101	10010100	Oral Iron	Non-Steroidal Anti-Inflammatory Drugs	7069	1521317	0.46%	2141	273975	0.78%
01010201	06020100	Compound Alginate Preparations	Thyroid Hormones	3368	1521317	0.22%	2134	273975	0.78%
04020101	04030300	First-Generation Antipsychotic Drugs	Selective Serotonin Re-Uptake Inhibitors (SSRI)	3053	1521317	0.20%	2130	273975	0.78%
04070100	05010102	Non-Opioid And Compound Analgesics	Penicillinase-Resistant Penicillins	5808	1521317	0.38%	2124	273975	0.78%
01010201	04020101	Compound Alginate Preparations	First-Generation Antipsychotic Drugs	6163	1521317	0.41%	2117	273975	0.77%
01070200	05010103	Compound Haemorrhoid Products With Corticosteroids	Broad-Spectrum Penicillins	6576	1521317	0.43%	2106	273975	0.77%
04065400	09010101	Products Used Against Nausea And Vertigo - Antihistamines	Oral Iron	7232	1521317	0.48%	2105	273975	0.77%
04070100	06020100	Non-Opioid And Compound Analgesics	Thyroid Hormones	2996	1521317	0.20%	2094	273975	0.76%
05010101	05010103	Benzylpenicillin And Phenoxymethylpenicillin	Broad-Spectrum Penicillins	7024	1521317	0.46%	2087	273975	0.76%
03010101	11040200	Selective Beta 2 Agonists	Other Anti-Inflammatory Eye Preparations (For The Eye)	3763	1521317	0.25%	2058	273975	0.75%
05010103	05010800	Broad-Spectrum Penicillins	Sulphonamides And Trimethoprim	6617	1521317	0.43%	2045	273975	0.75%
01030500	01060400	Proton Pump Inhibitors	Osmotic Laxatives	3963	1521317	0.26%	2044	273975	0.75%
04070200	05010103	Opioid Analgesics	Broad-Spectrum Penicillins	3684	1521317	0.24%	2027	273975	0.74%
03040102	13040000	Sedating Antihistamines	Topical Corticosteroids	5828	1521317	0.38%	2022	273975	0.74%
02090000	05010103	Antiplatelet Products	Broad-Spectrum Penicillins	4844	1521317	0.32%	2020	273975	0.74%
04030100	04030300	Tricyclic And Related Antidepressants	Selective Serotonin Re-Uptake Inhibitors (SSRI)	2720	1521317	0.18%	2014	273975	0.74%
03010101	03040102	Selective Beta 2 Agonists	Sedating Antihistamines	3533	1521317	0.23%	2010	273975	0.73%
04065400	05010103	Products Used Against Nausea And Vertigo - Antihistamines	Broad-Spectrum Penicillins	5773	1521317	0.38%	1989	273975	0.73%
05010102	13040000	Penicillinase-Resistant Penicillins	Topical Corticosteroids	5502	1521317	0.36%	1989	273975	0.73%
03040101	11040200	Non-Sedating Antihistamines	Other Anti-Inflammatory Eye Preparations (For The Eye)	4608	1521317	0.30%	1988	273975	0.73%
03010101	06040103	Selective Beta 2 Agonists	Progestogen Products Doubling (In House Use)	4219	1521317	0.28%	1965	273975	0.72%
04010100	05010103	Hypnotics	Broad-Spectrum Penicillins	3799	1521317	0.25%	1964	273975	0.72%
09010101	13020100	Oral Iron	Emollients	7289	1521317	0.48%	1961	273975	0.72%
03040102	05010103	Sedating Antihistamines	Broad-Spectrum Penicillins	5474	1521317	0.36%	1953	273975	0.71%
01060200	01060400	Stimulant Laxatives	Osmotic Laxatives	5164	1521317	0.34%	1952	273975	0.71%
01030100	07020250	H2-Receptor Antagonists	Preparations For Vaginal And Vulval Candidiasis	5013	1521317	0.33%	1950	273975	0.71%
04070100	05011300	Non-Opioid And Compound Analgesics	Urinary-Tract Infections	4972	1521317	0.33%	1950	273975	0.71%
03040102	04070100	Sedating Antihistamines	Non-Opioid And Compound Analgesics	4631	1521317	0.30%	1950	273975	0.71%
01010201	03040102	Compound Alginate Preparations	Sedating Antihistamines	5760	1521317	0.38%	1934	273975	0.71%
04030300	13020102	Selective Serotonin Re-Uptake Inhibitors (SSRI)	Emollient Skin Preparations	2732	1521317	0.18%	1931	273975	0.70%
01010201	01060100	Compound Alginate Preparations	Bulk-Forming Laxatives	5827	1521317	0.38%	1929	273975	0.70%
04030300	05010500	Selective Serotonin Re-Uptake Inhibitors (SSRI)	Macrolides	2744	1521317	0.18%	1915	273975	0.70%
05010800	07020250	Sulphonamides And Trimethoprim	Preparations For Vaginal And Vulval Candidiasis	6030	1521317	0.40%	1911	273975	0.70%
02090000	04070100	Antiplatelet Products	Non-Opioid And Compound Analgesics	3885	1521317	0.26%	1907	273975	0.70%
04065400	04070100	Products Used Against Nausea And Vertigo - Antihistamines	Non-Opioid And Compound Analgesics	4898	1521317	0.32%	1893	273975	0.69%
01040200	05010103	Antimotility Products	Broad-Spectrum Penicillins	4618	1521317	0.30%	1887	273975	0.69%
03010101	06020100	Selective Beta 2 Agonists	Thyroid Hormones	2176	1521317	0.14%	1871	273975	0.68%
01070200	04070100	Compound Haemorrhoid Products With Corticosteroids	Non-Opioid And Compound Analgesics	5020	1521317	0.33%	1864	273975	0.68%
02040000	04070100	Beta-Adrenoceptor Blockers	Non-Opioid And Compound Analgesics	2936	1521317	0.19%	1853	273975	0.68%
04020101	07020250	First-Generation Antipsychotic Drugs	Preparations For Vaginal And Vulval Candidiasis	5187	1521317	0.34%	1850	273975	0.68%
05010101	07020250	Benzylpenicillin And Phenoxymethylpenicillin	Preparations For Vaginal And Vulval Candidiasis	6840	1521317	0.45%	1841	273975	0.67%
01010201	04065400	Compound Alginate Preparations	Products Used Against Nausea And Vertigo - Antihistamines	5702	1521317	0.37%	1840	273975	0.67%
01060100	09010101	Bulk-Forming Laxatives	Oral Iron	6167	1521317	0.41%	1838	273975	0.67%
01040200	09010101	Antimotility Products	Oral Iron	4852	1521317	0.32%	1832	273975	0.67%
01010201	10010100	Compound Alginate Preparations	Non-Steroidal Anti-Inflammatory Drugs	5085	1521317	0.33%	1831	273975	0.67%
03040102	07020250	Sedating Antihistamines	Preparations For Vaginal And Vulval Candidiasis	5076	1521317	0.33%	1823	273975	0.67%
01060400	04060000	Osmotic Laxatives	Products Used Against Nausea And Vertigo	4639	1521317	0.30%	1823	273975	0.67%
06040103	09010101	Progestogen Products Doubling (In House Use)	Oral Iron	9027	1521317	0.59%	1818	273975	0.66%
05010101	09010101	Benzylpenicillin And Phenoxymethylpenicillin	Oral Iron	7632	1521317	0.50%	1811	273975	0.66%
01010201	13020100	Compound Alginate Preparations	Emollients	5816	1521317	0.38%	1811	273975	0.66%
04070100	05010800	Non-Opioid And Compound Analgesics	Sulphonamides And Trimethoprim	4674	1521317	0.31%	1805	273975	0.66%
04010100	09010101	Hypnotics	Oral Iron	3950	1521317	0.26%	1803	273975	0.66%
04030300	05011300	Selective Serotonin Re-Uptake Inhibitors (SSRI)	Urinary-Tract Infections	2668	1521317	0.18%	1797	273975	0.66%
04030300	05010102	Selective Serotonin Re-Uptake Inhibitors (SSRI)	Penicillinase-Resistant Penicillins	2732	1521317	0.18%	1791	273975	0.65%
03020000	03040101	Corticosteroids (For Respiratory Conditions)	Non-Sedating Antihistamines	2814	1521317	0.18%	1790	273975	0.65%
01060400	12020101	Osmotic Laxatives	Corticosteroids Used In Nasal Allergy	3907	1521317	0.26%	1783	273975	0.65%
04030100	09010101	Tricyclic And Related Antidepressants	Oral Iron	2938	1521317	0.19%	1782	273975	0.65%
04070100	05010101	Non-Opioid And Compound Analgesics	Benzylpenicillin And Phenoxymethylpenicillin	5639	1521317	0.37%	1777	273975	0.65%
07020250	10010100	Preparations For Vaginal And Vulval Candidiasis	Non-Steroidal Anti-Inflammatory Drugs	5063	1521317	0.33%	1765	273975	0.64%
01060100	01060400	Bulk-Forming Laxatives	Osmotic Laxatives	5123	1521317	0.34%	1760	273975	0.64%
04070200	09010101	Opioid Analgesics	Oral Iron	3618	1521317	0.24%	1753	273975	0.64%
02040000	09010101	Beta-Adrenoceptor Blockers	Oral Iron	3363	1521317	0.22%	1751	273975	0.64%
09010101	11040200	Oral Iron	Other Anti-Inflammatory Eye Preparations (For The Eye)	5681	1521317	0.37%	1745	273975	0.64%
01050200	03020000	Corticosteroids In Chronic Bowel Problems	Corticosteroids (For Respiratory Conditions)	3441	1521317	0.23%	1743	273975	0.64%
01030500	13040000	Proton Pump Inhibitors	Topical Corticosteroids	3263	1521317	0.21%	1738	273975	0.63%
01030100	04030300	H2-Receptor Antagonists	Selective Serotonin Re-Uptake Inhibitors (SSRI)	2377	1521317	0.16%	1738	273975	0.63%
04010201	05010103	Benzodiazepines	Broad-Spectrum Penicillins	2730	1521317	0.18%	1735	273975	0.63%
01010201	05010102	Compound Alginate Preparations	Penicillinase-Resistant Penicillins	5637	1521317	0.37%	1729	273975	0.63%
04030100	05010103	Tricyclic And Related Antidepressants	Broad-Spectrum Penicillins	2697	1521317	0.18%	1723	273975	0.63%
07020250	13020100	Preparations For Vaginal And Vulval Candidiasis	Emollients	5361	1521317	0.35%	1717	273975	0.63%
01030500	04060000	Proton Pump Inhibitors	Products Used Against Nausea And Vertigo	3502	1521317	0.23%	1717	273975	0.63%
01010201	02090000	Compound Alginate Preparations	Antiplatelet Products	4270	1521317	0.28%	1713	273975	0.63%
04020102	04030300	Second-Generation Antipsychotic Drugs	Selective Serotonin Re-Uptake Inhibitors (SSRI)	1861	1521317	0.12%	1698	273975	0.62%
04020101	04060000	First-Generation Antipsychotic Drugs	Products Used Against Nausea And Vertigo	5019	1521317	0.33%	1697	273975	0.62%
01050200	04070100	Corticosteroids In Chronic Bowel Problems	Non-Opioid And Compound Analgesics	2717	1521317	0.18%	1697	273975	0.62%
03010101	04070200	Selective Beta 2 Agonists	Opioid Analgesics	2244	1521317	0.15%	1694	273975	0.62%
06040103	07020250	Progestogen Products Doubling (In House Use)	Preparations For Vaginal And Vulval Candidiasis	6986	1521317	0.46%	1689	273975	0.62%
01050200	09010101	Corticosteroids In Chronic Bowel Problems	Oral Iron	3286	1521317	0.22%	1689	273975	0.62%
04030300	04065400	Selective Serotonin Re-Uptake Inhibitors (SSRI)	Products Used Against Nausea And Vertigo - Antihistamines	2515	1521317	0.17%	1689	273975	0.62%
04065500	04070100	Products Used Against Nausea And Vertigo - Domperidone & Metoclopramide	Non-Opioid And Compound Analgesics	4121	1521317	0.27%	1687	273975	0.62%
03010000	03020000	Bronchodilators	Corticosteroids (For Respiratory Conditions)	3668	1521317	0.24%	1682	273975	0.61%
03020000	05010201	Corticosteroids (For Respiratory Conditions)	Cephalosporins	3293	1521317	0.22%	1675	273975	0.61%
04065500	09010101	Products Used Against Nausea And Vertigo - Domperidone & Metoclopramide	Oral Iron	5531	1521317	0.36%	1674	273975	0.61%
04065500	05010103	Products Used Against Nausea And Vertigo - Domperidone & Metoclopramide	Broad-Spectrum Penicillins	4572	1521317	0.30%	1673	273975	0.61%
04030300	04030400	Selective Serotonin Re-Uptake Inhibitors (SSRI)	Other Antidepressants	2192	1521317	0.14%	1670	273975	0.61%
03010000	03010101	Bronchodilators	Selective Beta 2 Agonists	2985	1521317	0.20%	1669	273975	0.61%
02090000	07020250	Antiplatelet Products	Preparations For Vaginal And Vulval Candidiasis	4100	1521317	0.27%	1667	273975	0.61%
05010800	09010101	Sulphonamides And Trimethoprim	Oral Iron	6387	1521317	0.42%	1652	273975	0.60%
04065400	07020250	Products Used Against Nausea And Vertigo - Antihistamines	Preparations For Vaginal And Vulval Candidiasis	4865	1521317	0.32%	1652	273975	0.60%
01040200	07020250	Antimotility Products	Preparations For Vaginal And Vulval Candidiasis	3807	1521317	0.25%	1646	273975	0.60%
01010201	01040200	Compound Alginate Preparations	Antimotility Products	3998	1521317	0.26%	1643	273975	0.60%
04060000	04065400	Products Used Against Nausea And Vertigo	Products Used Against Nausea And Vertigo - Antihistamines	4943	1521317	0.32%	1640	273975	0.60%
01010201	04010100	Compound Alginate Preparations	Hypnotics	3333	1521317	0.22%	1640	273975	0.60%
04030400	05010103	Other Antidepressants	Broad-Spectrum Penicillins	2030	1521317	0.13%	1636	273975	0.60%
04010100	04010201	Hypnotics	Benzodiazepines	2034	1521317	0.13%	1634	273975	0.60%
04105100	05010103	Substance Dependence - Nicotine Dependence	Broad-Spectrum Penicillins	4693	1521317	0.31%	1632	273975	0.60%
01010201	04065500	Compound Alginate Preparations	Products Used Against Nausea And Vertigo - Domperidone & Metoclopramide	4694	1521317	0.31%	1631	273975	0.60%
01010201	11040200	Compound Alginate Preparations	Other Anti-Inflammatory Eye Preparations (For The Eye)	4631	1521317	0.30%	1631	273975	0.60%
04030400	09010101	Other Antidepressants	Oral Iron	2113	1521317	0.14%	1623	273975	0.59%
01030100	03010101	H2-Receptor Antagonists	Selective Beta 2 Agonists	2794	1521317	0.18%	1622	273975	0.59%
03010101	05010102	Selective Beta 2 Agonists	Penicillinase-Resistant Penicillins	2884	1521317	0.19%	1604	273975	0.59%
05010103	13020100	Broad-Spectrum Penicillins	Emollients	4696	1521317	0.31%	1595	273975	0.58%
04070100	13020100	Non-Opioid And Compound Analgesics	Emollients	4302	1521317	0.28%	1594	273975	0.58%
01010201	05011300	Compound Alginate Preparations	Urinary-Tract Infections	4866	1521317	0.32%	1590	273975	0.58%
03010101	13020100	Selective Beta 2 Agonists	Emollients	2683	1521317	0.18%	1587	273975	0.58%
01010201	04070200	Compound Alginate Preparations	Opioid Analgesics	2973	1521317	0.20%	1585	273975	0.58%
01040200	04030300	Antimotility Products	Selective Serotonin Re-Uptake Inhibitors (SSRI)	2116	1521317	0.14%	1584	273975	0.58%
03010101	13020101	Selective Beta 2 Agonists	Emollient Bath Additives And Shower Preparations	2350	1521317	0.15%	1583	273975	0.58%
02090000	04030300	Antiplatelet Products	Selective Serotonin Re-Uptake Inhibitors (SSRI)	2177	1521317	0.14%	1583	273975	0.58%
03010101	10010100	Selective Beta 2 Agonists	Non-Steroidal Anti-Inflammatory Drugs	2671	1521317	0.18%	1581	273975	0.58%
02040000	05010103	Beta-Adrenoceptor Blockers	Broad-Spectrum Penicillins	2768	1521317	0.18%	1574	273975	0.57%
04030300	05010800	Selective Serotonin Re-Uptake Inhibitors (SSRI)	Sulphonamides And Trimethoprim	2431	1521317	0.16%	1571	273975	0.57%
03040101	13020102	Non-Sedating Antihistamines	Emollient Skin Preparations	3401	1521317	0.22%	1569	273975	0.57%
01060400	03020000	Osmotic Laxatives	Corticosteroids (For Respiratory Conditions)	2692	1521317	0.18%	1565	273975	0.57%
05011100	07020250	Metronidazole And Tinidazole	Preparations For Vaginal And Vulval Candidiasis	5700	1521317	0.37%	1558	273975	0.57%
04010100	07020250	Hypnotics	Preparations For Vaginal And Vulval Candidiasis	3163	1521317	0.21%	1556	273975	0.57%
05010103	11040200	Broad-Spectrum Penicillins	Other Anti-Inflammatory Eye Preparations (For The Eye)	4174	1521317	0.27%	1550	273975	0.57%
04030100	07020250	Tricyclic And Related Antidepressants	Preparations For Vaginal And Vulval Candidiasis	2417	1521317	0.16%	1537	273975	0.56%
01060100	04070100	Bulk-Forming Laxatives	Non-Opioid And Compound Analgesics	3822	1521317	0.25%	1530	273975	0.56%
04060000	05010201	Products Used Against Nausea And Vertigo	Cephalosporins	4410	1521317	0.29%	1528	273975	0.56%
01030100	01030500	H2-Receptor Antagonists	Proton Pump Inhibitors	3192	1521317	0.21%	1523	273975	0.56%
04070200	07020250	Opioid Analgesics	Preparations For Vaginal And Vulval Candidiasis	2814	1521317	0.18%	1522	273975	0.56%
04010201	09010101	Benzodiazepines	Oral Iron	2566	1521317	0.17%	1518	273975	0.55%
04070100	04105100	Non-Opioid And Compound Analgesics	Substance Dependence - Nicotine Dependence	3758	1521317	0.25%	1511	273975	0.55%
01010201	04030100	Compound Alginate Preparations	Tricyclic And Related Antidepressants	2356	1521317	0.15%	1507	273975	0.55%
01060100	07020250	Bulk-Forming Laxatives	Preparations For Vaginal And Vulval Candidiasis	4472	1521317	0.29%	1503	273975	0.55%
03020000	13020102	Corticosteroids (For Respiratory Conditions)	Emollient Skin Preparations	2470	1521317	0.16%	1503	273975	0.55%
05010103	05011100	Broad-Spectrum Penicillins	Metronidazole And Tinidazole	5251	1521317	0.35%	1499	273975	0.55%
01060100	05010103	Bulk-Forming Laxatives	Broad-Spectrum Penicillins	4240	1521317	0.28%	1497	273975	0.55%
03040102	04030300	Sedating Antihistamines	Selective Serotonin Re-Uptake Inhibitors (SSRI)	2114	1521317	0.14%	1494	273975	0.55%
03010101	04010100	Selective Beta 2 Agonists	Hypnotics	2029	1521317	0.13%	1493	273975	0.54%
05010500	13040000	Macrolides	Topical Corticosteroids	3704	1521317	0.24%	1488	273975	0.54%
05010201	12020101	Cephalosporins	Corticosteroids Used In Nasal Allergy	3453	1521317	0.23%	1485	273975	0.54%
04060000	04065500	Products Used Against Nausea And Vertigo	Products Used Against Nausea And Vertigo - Domperidone & Metoclopramide	4253	1521317	0.28%	1483	273975	0.54%
01010201	05010101	Compound Alginate Preparations	Benzylpenicillin And Phenoxymethylpenicillin	5441	1521317	0.36%	1482	273975	0.54%
01030500	04070200	Proton Pump Inhibitors	Opioid Analgesics	2047	1521317	0.13%	1471	273975	0.54%
01060400	13020102	Osmotic Laxatives	Emollient Skin Preparations	3853	1521317	0.25%	1470	273975	0.54%
04030300	04065500	Selective Serotonin Re-Uptake Inhibitors (SSRI)	Products Used Against Nausea And Vertigo - Domperidone & Metoclopramide	2167	1521317	0.14%	1467	273975	0.54%
03010101	05011300	Selective Beta 2 Agonists	Urinary-Tract Infections	2629	1521317	0.17%	1464	273975	0.53%
01050200	07020250	Corticosteroids In Chronic Bowel Problems	Preparations For Vaginal And Vulval Candidiasis	2561	1521317	0.17%	1455	273975	0.53%
02090000	03010101	Antiplatelet Products	Selective Beta 2 Agonists	2320	1521317	0.15%	1449	273975	0.53%
04060000	13040000	Products Used Against Nausea And Vertigo	Topical Corticosteroids	3551	1521317	0.23%	1448	273975	0.53%
07020250	11040200	Preparations For Vaginal And Vulval Candidiasis	Other Anti-Inflammatory Eye Preparations (For The Eye)	3942	1521317	0.26%	1446	273975	0.53%
03010101	04020101	Selective Beta 2 Agonists	First-Generation Antipsychotic Drugs	2531	1521317	0.17%	1438	273975	0.52%
04030300	04105100	Selective Serotonin Re-Uptake Inhibitors (SSRI)	Substance Dependence - Nicotine Dependence	2112	1521317	0.14%	1437	273975	0.52%
06020100	13040000	Thyroid Hormones	Topical Corticosteroids	2172	1521317	0.14%	1433	273975	0.52%
03010101	04030100	Selective Beta 2 Agonists	Tricyclic And Related Antidepressants	1713	1521317	0.11%	1423	273975	0.52%
04105100	09010101	Substance Dependence - Nicotine Dependence	Oral Iron	5119	1521317	0.34%	1417	273975	0.52%
01010201	04105100	Compound Alginate Preparations	Substance Dependence - Nicotine Dependence	4447	1521317	0.29%	1414	273975	0.52%
09010101	09010200	Oral Iron	Drugs Used In Megaloblastic Anaemias	4303	1521317	0.28%	1403	273975	0.51%
05010201	05010500	Cephalosporins	Macrolides	3844	1521317	0.25%	1402	273975	0.51%
01010201	01050200	Compound Alginate Preparations	Corticosteroids In Chronic Bowel Problems	2479	1521317	0.16%	1401	273975	0.51%
04105100	07020250	Substance Dependence - Nicotine Dependence	Preparations For Vaginal And Vulval Candidiasis	4179	1521317	0.27%	1395	273975	0.51%
01040200	03010101	Antimotility Products	Selective Beta 2 Agonists	2164	1521317	0.14%	1394	273975	0.51%
06010202	09010101	Biguanides (Metformin)	Oral Iron	2848	1521317	0.19%	1384	273975	0.51%
01030500	05010201	Proton Pump Inhibitors	Cephalosporins	2791	1521317	0.18%	1381	273975	0.50%
01070200	04030300	Compound Haemorrhoid Products With Corticosteroids	Selective Serotonin Re-Uptake Inhibitors (SSRI)	2020	1521317	0.13%	1380	273975	0.50%
04065500	07020250	Products Used Against Nausea And Vertigo - Domperidone & Metoclopramide	Preparations For Vaginal And Vulval Candidiasis	3735	1521317	0.25%	1377	273975	0.50%
01010201	02040000	Compound Alginate Preparations	Beta-Adrenoceptor Blockers	2480	1521317	0.16%	1366	273975	0.50%
01070000	09010101	Local Products For Anal Or Rectal Problems	Oral Iron	5358	1521317	0.35%	1356	273975	0.49%
12020101	13020102	Corticosteroids Used In Nasal Allergy	Emollient Skin Preparations	2580	1521317	0.17%	1351	273975	0.49%
03010101	04065400	Selective Beta 2 Agonists	Products Used Against Nausea And Vertigo - Antihistamines	2417	1521317	0.16%	1351	273975	0.49%
04070100	11040200	Non-Opioid And Compound Analgesics	Other Anti-Inflammatory Eye Preparations (For The Eye)	3225	1521317	0.21%	1349	273975	0.49%
06040103	13040000	Progestogen Products Doubling (In House Use)	Topical Corticosteroids	4633	1521317	0.30%	1346	273975	0.49%
04010201	04070200	Benzodiazepines	Opioid Analgesics	1696	1521317	0.11%	1345	273975	0.49%
03010101	04030400	Selective Beta 2 Agonists	Other Antidepressants	1469	1521317	0.10%	1345	273975	0.49%
05010103	11030100	Broad-Spectrum Penicillins	Antibacterials (In Eye Preparation)	4881	1521317	0.32%	1336	273975	0.49%
06010101	06010202	Short-Acting Insulins	Biguanides (Metformin)	2304	1521317	0.15%	1336	273975	0.49%
05010201	05011300	Cephalosporins	Urinary-Tract Infections	4416	1521317	0.29%	1333	273975	0.49%
06010102	06010202	Intermediate- And Long-Acting Insulins	Biguanides (Metformin)	2298	1521317	0.15%	1333	273975	0.49%
04070200	10010100	Opioid Analgesics	Non-Steroidal Anti-Inflammatory Drugs	2385	1521317	0.16%	1332	273975	0.49%
04010100	04030400	Hypnotics	Other Antidepressants	1559	1521317	0.10%	1330	273975	0.49%
01030500	12020101	Proton Pump Inhibitors	Corticosteroids Used In Nasal Allergy	2153	1521317	0.14%	1329	273975	0.49%
03010101	04010201	Selective Beta 2 Agonists	Benzodiazepines	1648	1521317	0.11%	1329	273975	0.49%
01010201	01070000	Compound Alginate Preparations	Local Products For Anal Or Rectal Problems	4884	1521317	0.32%	1318	273975	0.48%
01010201	04010201	Compound Alginate Preparations	Benzodiazepines	2098	1521317	0.14%	1318	273975	0.48%
06010101	06010400	Short-Acting Insulins	Treatment Of Hypoglycaemia	1992	1521317	0.13%	1316	273975	0.48%
13020103	13040000	Antimicrobial Emollients	Topical Corticosteroids	3461	1521317	0.23%	1315	273975	0.48%
01030100	01060400	H2-Receptor Antagonists	Osmotic Laxatives	3200	1521317	0.21%	1314	273975	0.48%
04030400	07020250	Other Antidepressants	Preparations For Vaginal And Vulval Candidiasis	1653	1521317	0.11%	1314	273975	0.48%
09010101	09060400	Oral Iron	Vitamin D	4282	1521317	0.28%	1307	273975	0.48%
01010201	04030400	Compound Alginate Preparations	Other Antidepressants	1632	1521317	0.11%	1306	273975	0.48%
04030100	04070200	Tricyclic And Related Antidepressants	Opioid Analgesics	1739	1521317	0.11%	1302	273975	0.48%
01030500	03040101	Proton Pump Inhibitors	Non-Sedating Antihistamines	1944	1521317	0.13%	1299	273975	0.47%
01030500	10010100	Proton Pump Inhibitors	Non-Steroidal Anti-Inflammatory Drugs	2339	1521317	0.15%	1298	273975	0.47%
04010201	07020250	Benzodiazepines	Preparations For Vaginal And Vulval Candidiasis	2014	1521317	0.13%	1298	273975	0.47%
01010201	05010800	Compound Alginate Preparations	Sulphonamides And Trimethoprim	4197	1521317	0.28%	1293	273975	0.47%
06010102	06010400	Intermediate- And Long-Acting Insulins	Treatment Of Hypoglycaemia	1943	1521317	0.13%	1292	273975	0.47%
01070200	03010101	Compound Haemorrhoid Products With Corticosteroids	Selective Beta 2 Agonists	2444	1521317	0.16%	1290	273975	0.47%
03020000	05010500	Corticosteroids (For Respiratory Conditions)	Macrolides	2379	1521317	0.16%	1289	273975	0.47%
01030100	04060000	H2-Receptor Antagonists	Products Used Against Nausea And Vertigo	3442	1521317	0.23%	1280	273975	0.47%
01060400	03040101	Osmotic Laxatives	Non-Sedating Antihistamines	2510	1521317	0.16%	1273	273975	0.46%
01070200	13040000	Compound Haemorrhoid Products With Corticosteroids	Topical Corticosteroids	3588	1521317	0.24%	1263	273975	0.46%
01070000	07020250	Local Products For Anal Or Rectal Problems	Preparations For Vaginal And Vulval Candidiasis	4559	1521317	0.30%	1262	273975	0.46%
13020100	13020102	Emollients	Emollient Skin Preparations	3326	1521317	0.22%	1261	273975	0.46%
01010201	06040103	Compound Alginate Preparations	Progestogen Products Doubling (In House Use)	5039	1521317	0.33%	1258	273975	0.46%
04070100	05011100	Non-Opioid And Compound Analgesics	Metronidazole And Tinidazole	3488	1521317	0.23%	1258	273975	0.46%
11040200	13040000	Other Anti-Inflammatory Eye Preparations (For The Eye)	Topical Corticosteroids	2841	1521317	0.19%	1251	273975	0.46%
05010103	06010101	Broad-Spectrum Penicillins	Short-Acting Insulins	1896	1521317	0.12%	1250	273975	0.46%
09010101	13020101	Oral Iron	Emollient Bath Additives And Shower Preparations	3603	1521317	0.24%	1247	273975	0.46%
01060400	04070200	Osmotic Laxatives	Opioid Analgesics	2104	1521317	0.14%	1246	273975	0.45%
01060200	04070100	Stimulant Laxatives	Non-Opioid And Compound Analgesics	2569	1521317	0.17%	1244	273975	0.45%
04030300	05010101	Selective Serotonin Re-Uptake Inhibitors (SSRI)	Benzylpenicillin And Phenoxymethylpenicillin	2017	1521317	0.13%	1244	273975	0.45%
10010100	13040000	Non-Steroidal Anti-Inflammatory Drugs	Topical Corticosteroids	3037	1521317	0.20%	1242	273975	0.45%
04070100	10030250	Non-Opioid And Compound Analgesics	Topical Nsaids And Counter Irritants	3218	1521317	0.21%	1235	273975	0.45%
01030500	04030100	Proton Pump Inhibitors	Tricyclic And Related Antidepressants	1637	1521317	0.11%	1232	273975	0.45%
03010000	05010103	Bronchodilators	Broad-Spectrum Penicillins	2722	1521317	0.18%	1230	273975	0.45%
03040102	13020102	Sedating Antihistamines	Emollient Skin Preparations	3492	1521317	0.23%	1229	273975	0.45%
05010103	13100101	Broad-Spectrum Penicillins	Antibacterial Preparations Only Used Topically	3690	1521317	0.24%	1222	273975	0.45%
03010101	04105100	Selective Beta 2 Agonists	Substance Dependence - Nicotine Dependence	2222	1521317	0.15%	1210	273975	0.44%
05010103	06010202	Broad-Spectrum Penicillins	Biguanides (Metformin)	2284	1521317	0.15%	1209	273975	0.44%
05010103	06010102	Broad-Spectrum Penicillins	Intermediate- And Long-Acting Insulins	1845	1521317	0.12%	1209	273975	0.44%
05010201	05010800	Cephalosporins	Sulphonamides And Trimethoprim	4155	1521317	0.27%	1208	273975	0.44%
01060400	06020100	Osmotic Laxatives	Thyroid Hormones	1806	1521317	0.12%	1199	273975	0.44%
05010201	13020102	Cephalosporins	Emollient Skin Preparations	3261	1521317	0.21%	1193	273975	0.44%
03010101	03030200	Selective Beta 2 Agonists	Leukotriene Receptor Antagonists	1670	1521317	0.11%	1189	273975	0.43%
04010201	04030400	Benzodiazepines	Other Antidepressants	1334	1521317	0.09%	1186	273975	0.43%
01060400	10010100	Osmotic Laxatives	Non-Steroidal Anti-Inflammatory Drugs	2917	1521317	0.19%	1185	273975	0.43%
09010101	11030100	Oral Iron	Antibacterials (In Eye Preparation)	5204	1521317	0.34%	1183	273975	0.43%
03010101	05010101	Selective Beta 2 Agonists	Benzylpenicillin And Phenoxymethylpenicillin	2564	1521317	0.17%	1183	273975	0.43%
02040000	07020250	Beta-Adrenoceptor Blockers	Preparations For Vaginal And Vulval Candidiasis	2099	1521317	0.14%	1181	273975	0.43%
01050200	13040000	Corticosteroids In Chronic Bowel Problems	Topical Corticosteroids	1931	1521317	0.13%	1177	273975	0.43%
09010101	13100101	Oral Iron	Antibacterial Preparations Only Used Topically	4250	1521317	0.28%	1176	273975	0.43%
03010101	05010800	Selective Beta 2 Agonists	Sulphonamides And Trimethoprim	2210	1521317	0.15%	1174	273975	0.43%
01050200	04030300	Corticosteroids In Chronic Bowel Problems	Selective Serotonin Re-Uptake Inhibitors (SSRI)	1381	1521317	0.09%	1169	273975	0.43%
07020250	13020101	Preparations For Vaginal And Vulval Candidiasis	Emollient Bath Additives And Shower Preparations	2859	1521317	0.19%	1167	273975	0.43%
07020250	13100101	Preparations For Vaginal And Vulval Candidiasis	Antibacterial Preparations Only Used Topically	3656	1521317	0.24%	1164	273975	0.42%
01060400	04020101	Osmotic Laxatives	First-Generation Antipsychotic Drugs	2996	1521317	0.20%	1164	273975	0.42%
05010103	13020101	Broad-Spectrum Penicillins	Emollient Bath Additives And Shower Preparations	2710	1521317	0.18%	1161	273975	0.42%
01020200	04070100	Other Antispasmodics	Non-Opioid And Compound Analgesics	2192	1521317	0.14%	1158	273975	0.42%
06010101	09010101	Short-Acting Insulins	Oral Iron	1937	1521317	0.13%	1157	273975	0.42%
04070100	06010202	Non-Opioid And Compound Analgesics	Biguanides (Metformin)	1810	1521317	0.12%	1157	273975	0.42%
01060200	09010101	Stimulant Laxatives	Oral Iron	3171	1521317	0.21%	1152	273975	0.42%
03010101	04065500	Selective Beta 2 Agonists	Products Used Against Nausea And Vertigo - Domperidone & Metoclopramide	1943	1521317	0.13%	1152	273975	0.42%
05011100	09010101	Metronidazole And Tinidazole	Oral Iron	4590	1521317	0.30%	1151	273975	0.42%
01010201	13020101	Compound Alginate Preparations	Emollient Bath Additives And Shower Preparations	2844	1521317	0.19%	1144	273975	0.42%
01030500	02090000	Proton Pump Inhibitors	Antiplatelet Products	1880	1521317	0.12%	1133	273975	0.41%
01030500	03020000	Proton Pump Inhibitors	Corticosteroids (For Respiratory Conditions)	1650	1521317	0.11%	1128	273975	0.41%
06010101	07020250	Short-Acting Insulins	Preparations For Vaginal And Vulval Candidiasis	1727	1521317	0.11%	1126	273975	0.41%
01060400	01070000	Osmotic Laxatives	Local Products For Anal Or Rectal Problems	3976	1521317	0.26%	1117	273975	0.41%
03040102	12020101	Sedating Antihistamines	Corticosteroids Used In Nasal Allergy	2716	1521317	0.18%	1113	273975	0.41%
05020100	07020250	Triazole Antifungals	Preparations For Vaginal And Vulval Candidiasis	3217	1521317	0.21%	1111	273975	0.41%
04070100	13100101	Non-Opioid And Compound Analgesics	Antibacterial Preparations Only Used Topically	2863	1521317	0.19%	1109	273975	0.40%
06010102	07020250	Intermediate- And Long-Acting Insulins	Preparations For Vaginal And Vulval Candidiasis	1692	1521317	0.11%	1109	273975	0.40%
07020250	11030100	Preparations For Vaginal And Vulval Candidiasis	Antibacterials (In Eye Preparation)	3819	1521317	0.25%	1094	273975	0.40%
06010202	07020250	Biguanides (Metformin)	Preparations For Vaginal And Vulval Candidiasis	1990	1521317	0.13%	1093	273975	0.40%
04020101	04065400	First-Generation Antipsychotic Drugs	Products Used Against Nausea And Vertigo - Antihistamines	3223	1521317	0.21%	1090	273975	0.40%
04030300	05011100	Selective Serotonin Re-Uptake Inhibitors (SSRI)	Metronidazole And Tinidazole	1788	1521317	0.12%	1090	273975	0.40%
01030100	13040000	H2-Receptor Antagonists	Topical Corticosteroids	2526	1521317	0.17%	1087	273975	0.40%
02090000	13040000	Antiplatelet Products	Topical Corticosteroids	2295	1521317	0.15%	1073	273975	0.39%
01060400	05010500	Osmotic Laxatives	Macrolides	2719	1521317	0.18%	1065	273975	0.39%
01030500	04030400	Proton Pump Inhibitors	Other Antidepressants	1183	1521317	0.08%	1063	273975	0.39%
01030500	04065500	Proton Pump Inhibitors	Products Used Against Nausea And Vertigo - Domperidone & Metoclopramide	2174	1521317	0.14%	1061	273975	0.39%
04010100	04070200	Hypnotics	Opioid Analgesics	1400	1521317	0.09%	1060	273975	0.39%
05011300	13040000	Urinary-Tract Infections	Topical Corticosteroids	2700	1521317	0.18%	1059	273975	0.39%
01060400	05011300	Osmotic Laxatives	Urinary-Tract Infections	2922	1521317	0.19%	1058	273975	0.39%
01010201	01060200	Compound Alginate Preparations	Stimulant Laxatives	2633	1521317	0.17%	1057	273975	0.39%
01040200	01060400	Antimotility Products	Osmotic Laxatives	2403	1521317	0.16%	1056	273975	0.39%
04070100	04070401	Non-Opioid And Compound Analgesics	Acute Migraine	1873	1521317	0.12%	1053	273975	0.38%
01010201	13100101	Compound Alginate Preparations	Antibacterial Preparations Only Used Topically	3243	1521317	0.21%	1048	273975	0.38%
04060000	05011300	Products Used Against Nausea And Vertigo	Urinary-Tract Infections	2677	1521317	0.18%	1048	273975	0.38%
05010500	12020101	Macrolides	Corticosteroids Used In Nasal Allergy	2147	1521317	0.14%	1044	273975	0.38%
01070000	05010103	Local Products For Anal Or Rectal Problems	Broad-Spectrum Penicillins	3413	1521317	0.22%	1042	273975	0.38%
04070100	13020101	Non-Opioid And Compound Analgesics	Emollient Bath Additives And Shower Preparations	2192	1521317	0.14%	1037	273975	0.38%
06010102	09010101	Intermediate- And Long-Acting Insulins	Oral Iron	1732	1521317	0.11%	1035	273975	0.38%
02090000	06010101	Antiplatelet Products	Short-Acting Insulins	1439	1521317	0.09%	1034	273975	0.38%
03040101	03040102	Non-Sedating Antihistamines	Sedating Antihistamines	2308	1521317	0.15%	1031	273975	0.38%
01010201	03010000	Compound Alginate Preparations	Bronchodilators	2117	1521317	0.14%	1031	273975	0.38%
01060400	02090000	Osmotic Laxatives	Antiplatelet Products	2351	1521317	0.15%	1030	273975	0.38%
01030500	06020100	Proton Pump Inhibitors	Thyroid Hormones	1319	1521317	0.09%	1030	273975	0.38%
04070100	11030100	Non-Opioid And Compound Analgesics	Antibacterials (In Eye Preparation)	3075	1521317	0.20%	1028	273975	0.38%
04020101	13040000	First-Generation Antipsychotic Drugs	Topical Corticosteroids	2487	1521317	0.16%	1027	273975	0.37%
01060400	04030100	Osmotic Laxatives	Tricyclic And Related Antidepressants	1513	1521317	0.10%	1020	273975	0.37%
01060400	04065400	Osmotic Laxatives	Products Used Against Nausea And Vertigo - Antihistamines	2674	1521317	0.18%	1019	273975	0.37%
01010201	11030100	Compound Alginate Preparations	Antibacterials (In Eye Preparation)	3791	1521317	0.25%	1017	273975	0.37%
04020101	05010201	First-Generation Antipsychotic Drugs	Cephalosporins	2944	1521317	0.19%	1012	273975	0.37%
05010201	10010100	Cephalosporins	Non-Steroidal Anti-Inflammatory Drugs	2840	1521317	0.19%	1012	273975	0.37%
02040000	02090000	Beta-Adrenoceptor Blockers	Antiplatelet Products	1805	1521317	0.12%	1009	273975	0.37%
13020100	13020101	Emollients	Emollient Bath Additives And Shower Preparations	2687	1521317	0.18%	1002	273975	0.37%
04070100	06010101	Non-Opioid And Compound Analgesics	Short-Acting Insulins	1449	1521317	0.10%	1001	273975	0.37%
01030500	04010100	Proton Pump Inhibitors	Hypnotics	1422	1521317	0.09%	1000	273975	0.36%
01060200	05010103	Stimulant Laxatives	Broad-Spectrum Penicillins	2345	1521317	0.15%	998	273975	0.36%
04070100	06010102	Non-Opioid And Compound Analgesics	Intermediate- And Long-Acting Insulins	1429	1521317	0.09%	995	273975	0.36%
01060400	04010100	Osmotic Laxatives	Hypnotics	1784	1521317	0.12%	993	273975	0.36%
04020102	04030400	Second-Generation Antipsychotic Drugs	Other Antidepressants	1044	1521317	0.07%	993	273975	0.36%
04060000	04065600	Products Used Against Nausea And Vertigo	Products Used Against Nausea And Vertigo - 5 HT3 Antagonists	2784	1521317	0.18%	988	273975	0.36%
01030100	05010201	H2-Receptor Antagonists	Cephalosporins	2530	1521317	0.17%	986	273975	0.36%
05010103	12010151	Broad-Spectrum Penicillins	Anti-Inflammatory Preparations	3089	1521317	0.20%	980	273975	0.36%
01070000	04070100	Local Products For Anal Or Rectal Problems	Non-Opioid And Compound Analgesics	2784	1521317	0.18%	980	273975	0.36%
01030500	04020101	Proton Pump Inhibitors	First-Generation Antipsychotic Drugs	1995	1521317	0.13%	977	273975	0.36%
05010101	13040000	Benzylpenicillin And Phenoxymethylpenicillin	Topical Corticosteroids	2909	1521317	0.19%	976	273975	0.36%
03040101	05010201	Non-Sedating Antihistamines	Cephalosporins	2112	1521317	0.14%	974	273975	0.36%
01030500	02040000	Proton Pump Inhibitors	Beta-Adrenoceptor Blockers	1302	1521317	0.09%	973	273975	0.36%
02090000	06010102	Antiplatelet Products	Intermediate- And Long-Acting Insulins	1377	1521317	0.09%	970	273975	0.35%
03020000	11040200	Corticosteroids (For Respiratory Conditions)	Other Anti-Inflammatory Eye Preparations (For The Eye)	1722	1521317	0.11%	968	273975	0.35%
01010201	06010202	Compound Alginate Preparations	Biguanides (Metformin)	1815	1521317	0.12%	963	273975	0.35%
04030300	13020100	Selective Serotonin Re-Uptake Inhibitors (SSRI)	Emollients	1385	1521317	0.09%	959	273975	0.35%
01030500	13020102	Proton Pump Inhibitors	Emollient Skin Preparations	1763	1521317	0.12%	958	273975	0.35%
03010000	09010101	Bronchodilators	Oral Iron	2242	1521317	0.15%	953	273975	0.35%
01060400	05010102	Osmotic Laxatives	Penicillinase-Resistant Penicillins	2656	1521317	0.17%	952	273975	0.35%
01030500	05010500	Proton Pump Inhibitors	Macrolides	1805	1521317	0.12%	952	273975	0.35%
04070200	13040000	Opioid Analgesics	Topical Corticosteroids	1584	1521317	0.10%	951	273975	0.35%
06040103	10010100	Progestogen Products Doubling (In House Use)	Non-Steroidal Anti-Inflammatory Drugs	3429	1521317	0.23%	949	273975	0.35%
04060000	12020101	Products Used Against Nausea And Vertigo	Corticosteroids Used In Nasal Allergy	1970	1521317	0.13%	948	273975	0.35%
01050200	12020101	Corticosteroids In Chronic Bowel Problems	Corticosteroids Used In Nasal Allergy	1386	1521317	0.09%	947	273975	0.35%
05010102	13020102	Penicillinase-Resistant Penicillins	Emollient Skin Preparations	2455	1521317	0.16%	946	273975	0.35%
06040102	09010101	Progestogens And Progesterone Receptor Modulators	Oral Iron	2844	1521317	0.19%	943	273975	0.34%
04020101	04065500	First-Generation Antipsychotic Drugs	Products Used Against Nausea And Vertigo - Domperidone & Metoclopramide	2707	1521317	0.18%	943	273975	0.34%
13040000	71580200	Topical Corticosteroids	Emollient Ointment	2394	1521317	0.16%	943	273975	0.34%
04030300	11040200	Selective Serotonin Re-Uptake Inhibitors (SSRI)	Other Anti-Inflammatory Eye Preparations (For The Eye)	1259	1521317	0.08%	943	273975	0.34%
05010800	05011300	Sulphonamides And Trimethoprim	Urinary-Tract Infections	2974	1521317	0.20%	939	273975	0.34%
01060400	03040102	Osmotic Laxatives	Sedating Antihistamines	2431	1521317	0.16%	939	273975	0.34%
03010101	06010202	Selective Beta 2 Agonists	Biguanides (Metformin)	1245	1521317	0.08%	939	273975	0.34%
04030400	04070200	Other Antidepressants	Opioid Analgesics	1058	1521317	0.07%	939	273975	0.34%
01060200	07020250	Stimulant Laxatives	Preparations For Vaginal And Vulval Candidiasis	2341	1521317	0.15%	938	273975	0.34%
01030500	04010201	Proton Pump Inhibitors	Benzodiazepines	1192	1521317	0.08%	937	273975	0.34%
06020100	12020101	Thyroid Hormones	Corticosteroids Used In Nasal Allergy	1204	1521317	0.08%	934	273975	0.34%
01060400	04065500	Osmotic Laxatives	Products Used Against Nausea And Vertigo - Domperidone & Metoclopramide	2245	1521317	0.15%	932	273975	0.34%
01020200	04030300	Other Antispasmodics	Selective Serotonin Re-Uptake Inhibitors (SSRI)	1221	1521317	0.08%	932	273975	0.34%
01050200	03040101	Corticosteroids In Chronic Bowel Problems	Non-Sedating Antihistamines	1464	1521317	0.10%	929	273975	0.34%
04010100	13040000	Hypnotics	Topical Corticosteroids	1669	1521317	0.11%	928	273975	0.34%
01030500	01050200	Proton Pump Inhibitors	Corticosteroids In Chronic Bowel Problems	1310	1521317	0.09%	927	273975	0.34%
02090000	06010202	Antiplatelet Products	Biguanides (Metformin)	1642	1521317	0.11%	925	273975	0.34%
01060400	04010201	Osmotic Laxatives	Benzodiazepines	1356	1521317	0.09%	925	273975	0.34%
01060100	04030300	Bulk-Forming Laxatives	Selective Serotonin Re-Uptake Inhibitors (SSRI)	1341	1521317	0.09%	925	273975	0.34%
05010201	06020100	Cephalosporins	Thyroid Hormones	1422	1521317	0.09%	923	273975	0.34%
13040000	13100101	Topical Corticosteroids	Antibacterial Preparations Only Used Topically	2550	1521317	0.17%	922	273975	0.34%
04065400	05010201	Products Used Against Nausea And Vertigo - Antihistamines	Cephalosporins	2661	1521317	0.17%	921	273975	0.34%
01050200	05010500	Corticosteroids In Chronic Bowel Problems	Macrolides	1692	1521317	0.11%	921	273975	0.34%
04030300	06010202	Selective Serotonin Re-Uptake Inhibitors (SSRI)	Biguanides (Metformin)	1060	1521317	0.07%	921	273975	0.34%
07020250	13040200	Preparations For Vaginal And Vulval Candidiasis	Mild Topical Corticosteroids	3257	1521317	0.21%	917	273975	0.33%
01060100	03010101	Bulk-Forming Laxatives	Selective Beta 2 Agonists	1613	1521317	0.11%	908	273975	0.33%
03010101	11030100	Selective Beta 2 Agonists	Antibacterials (In Eye Preparation)	1876	1521317	0.12%	903	273975	0.33%
02090000	06020100	Antiplatelet Products	Thyroid Hormones	1268	1521317	0.08%	897	273975	0.33%
01040200	13040000	Antimotility Products	Topical Corticosteroids	1834	1521317	0.12%	896	273975	0.33%
01010101	09010101	Aluminium- And Magnesium- Containing Antacids	Oral Iron	3852	1521317	0.25%	894	273975	0.33%
01020200	09010101	Other Antispasmodics	Oral Iron	2042	1521317	0.13%	893	273975	0.33%
01010201	01020200	Compound Alginate Preparations	Other Antispasmodics	1910	1521317	0.13%	891	273975	0.33%
04060000	04070200	Products Used Against Nausea And Vertigo	Opioid Analgesics	1439	1521317	0.09%	886	273975	0.32%
03020000	04060000	Corticosteroids (For Respiratory Conditions)	Products Used Against Nausea And Vertigo	1480	1521317	0.10%	884	273975	0.32%
04070100	09060400	Non-Opioid And Compound Analgesics	Vitamin D	2008	1521317	0.13%	880	273975	0.32%
04030100	10010100	Tricyclic And Related Antidepressants	Non-Steroidal Anti-Inflammatory Drugs	1404	1521317	0.09%	879	273975	0.32%
01070200	05010201	Compound Haemorrhoid Products With Corticosteroids	Cephalosporins	2634	1521317	0.17%	878	273975	0.32%
04065400	04065500	Products Used Against Nausea And Vertigo - Antihistamines	Products Used Against Nausea And Vertigo - Domperidone & Metoclopramide	2638	1521317	0.17%	877	273975	0.32%
01050200	05010201	Corticosteroids In Chronic Bowel Problems	Cephalosporins	1567	1521317	0.10%	876	273975	0.32%
04030300	13100101	Selective Serotonin Re-Uptake Inhibitors (SSRI)	Antibacterial Preparations Only Used Topically	1268	1521317	0.08%	876	273975	0.32%
01030500	05011300	Proton Pump Inhibitors	Urinary-Tract Infections	1731	1521317	0.11%	870	273975	0.32%
04065400	13040000	Products Used Against Nausea And Vertigo - Antihistamines	Topical Corticosteroids	2221	1521317	0.15%	869	273975	0.32%
01030500	01040200	Proton Pump Inhibitors	Antimotility Products	1431	1521317	0.09%	866	273975	0.32%
03020000	03040102	Corticosteroids (For Respiratory Conditions)	Sedating Antihistamines	1489	1521317	0.10%	864	273975	0.32%
04010100	04060000	Hypnotics	Products Used Against Nausea And Vertigo	1846	1521317	0.12%	863	273975	0.31%
04010201	04030100	Benzodiazepines	Tricyclic And Related Antidepressants	1073	1521317	0.07%	862	273975	0.31%
01060100	13040000	Bulk-Forming Laxatives	Topical Corticosteroids	2125	1521317	0.14%	861	273975	0.31%
01010201	05011100	Compound Alginate Preparations	Metronidazole And Tinidazole	2945	1521317	0.19%	857	273975	0.31%
03040101	06040103	Non-Sedating Antihistamines	Progestogen Products Doubling (In House Use)	2374	1521317	0.16%	857	273975	0.31%
01030500	06040103	Proton Pump Inhibitors	Progestogen Products Doubling (In House Use)	1880	1521317	0.12%	854	273975	0.31%
01020200	05010103	Other Antispasmodics	Broad-Spectrum Penicillins	1868	1521317	0.12%	853	273975	0.31%
01010101	01010201	Aluminium- And Magnesium- Containing Antacids	Compound Alginate Preparations	3152	1521317	0.21%	848	273975	0.31%
05010102	05010201	Penicillinase-Resistant Penicillins	Cephalosporins	2614	1521317	0.17%	844	273975	0.31%
04070200	05010201	Opioid Analgesics	Cephalosporins	1518	1521317	0.10%	844	273975	0.31%
04030100	13040000	Tricyclic And Related Antidepressants	Topical Corticosteroids	1251	1521317	0.08%	843	273975	0.31%
13040000	13090000	Topical Corticosteroids	Shampoos And Other Preparations For Scalp And Hair Conditions	1851	1521317	0.12%	840	273975	0.31%
05010800	13040000	Sulphonamides And Trimethoprim	Topical Corticosteroids	2357	1521317	0.15%	839	273975	0.31%
03040101	06020100	Non-Sedating Antihistamines	Thyroid Hormones	1099	1521317	0.07%	838	273975	0.31%
01060400	06040103	Osmotic Laxatives	Progestogen Products Doubling (In House Use)	2875	1521317	0.19%	837	273975	0.31%
03010000	07020250	Bronchodilators	Preparations For Vaginal And Vulval Candidiasis	1703	1521317	0.11%	837	273975	0.31%
01060400	13020100	Osmotic Laxatives	Emollients	2256	1521317	0.15%	836	273975	0.31%
03020000	06040103	Corticosteroids (For Respiratory Conditions)	Progestogen Products Doubling (In House Use)	1870	1521317	0.12%	833	273975	0.30%
04070100	09010200	Non-Opioid And Compound Analgesics	Drugs Used In Megaloblastic Anaemias	1731	1521317	0.11%	832	273975	0.30%
04030300	05010300	Selective Serotonin Re-Uptake Inhibitors (SSRI)	Tetracyclines	1175	1521317	0.08%	831	273975	0.30%
01060400	05010800	Osmotic Laxatives	Sulphonamides And Trimethoprim	2215	1521317	0.15%	830	273975	0.30%
03040102	05010201	Sedating Antihistamines	Cephalosporins	2340	1521317	0.15%	829	273975	0.30%
05010103	09010200	Broad-Spectrum Penicillins	Drugs Used In Megaloblastic Anaemias	1937	1521317	0.13%	823	273975	0.30%
01060400	04030400	Osmotic Laxatives	Other Antidepressants	987	1521317	0.06%	823	273975	0.30%
04010100	04030100	Hypnotics	Tricyclic And Related Antidepressants	1077	1521317	0.07%	818	273975	0.30%
03040101	13020101	Non-Sedating Antihistamines	Emollient Bath Additives And Shower Preparations	1488	1521317	0.10%	812	273975	0.30%
03010101	13100101	Selective Beta 2 Agonists	Antibacterial Preparations Only Used Topically	1521	1521317	0.10%	811	273975	0.30%
01040200	05010201	Antimotility Products	Cephalosporins	1934	1521317	0.13%	808	273975	0.29%
04010100	05010201	Hypnotics	Cephalosporins	1618	1521317	0.11%	807	273975	0.29%
01060200	04030300	Stimulant Laxatives	Selective Serotonin Re-Uptake Inhibitors (SSRI)	1038	1521317	0.07%	807	273975	0.29%
04030300	11030100	Selective Serotonin Re-Uptake Inhibitors (SSRI)	Antibacterials (In Eye Preparation)	1223	1521317	0.08%	806	273975	0.29%
01030500	04065400	Proton Pump Inhibitors	Products Used Against Nausea And Vertigo - Antihistamines	1770	1521317	0.12%	804	273975	0.29%
03010000	04070100	Bronchodilators	Non-Opioid And Compound Analgesics	1478	1521317	0.10%	804	273975	0.29%
05010201	06040103	Cephalosporins	Progestogen Products Doubling (In House Use)	3248	1521317	0.21%	799	273975	0.29%
04010201	10010100	Benzodiazepines	Non-Steroidal Anti-Inflammatory Drugs	1460	1521317	0.10%	799	273975	0.29%
03020000	13020100	Corticosteroids (For Respiratory Conditions)	Emollients	1373	1521317	0.09%	798	273975	0.29%
04020102	04070100	Second-Generation Antipsychotic Drugs	Non-Opioid And Compound Analgesics	871	1521317	0.06%	798	273975	0.29%
11030100	13040000	Antibacterials (In Eye Preparation)	Topical Corticosteroids	2298	1521317	0.15%	797	273975	0.29%
01010101	04070100	Aluminium- And Magnesium- Containing Antacids	Non-Opioid And Compound Analgesics	2473	1521317	0.16%	789	273975	0.29%
05010103	09060400	Broad-Spectrum Penicillins	Vitamin D	2084	1521317	0.14%	788	273975	0.29%
04030400	13040000	Other Antidepressants	Topical Corticosteroids	943	1521317	0.06%	788	273975	0.29%
02090000	05010201	Antiplatelet Products	Cephalosporins	1830	1521317	0.12%	786	273975	0.29%
04065500	05010201	Products Used Against Nausea And Vertigo - Domperidone & Metoclopramide	Cephalosporins	2213	1521317	0.15%	783	273975	0.29%
04010100	04020101	Hypnotics	First-Generation Antipsychotic Drugs	1456	1521317	0.10%	782	273975	0.29%
09010101	14040800	Oral Iron	Vaccines And Antisera - Diphtheria Vaccines	3416	1521317	0.22%	779	273975	0.28%
04030300	13020101	Selective Serotonin Re-Uptake Inhibitors (SSRI)	Emollient Bath Additives And Shower Preparations	1042	1521317	0.07%	779	273975	0.28%
04060000	13020102	Products Used Against Nausea And Vertigo	Emollient Skin Preparations	1871	1521317	0.12%	774	273975	0.28%
03010101	05011100	Selective Beta 2 Agonists	Metronidazole And Tinidazole	1458	1521317	0.10%	774	273975	0.28%
01010201	06010101	Compound Alginate Preparations	Short-Acting Insulins	1281	1521317	0.08%	774	273975	0.28%
06010101	06020100	Short-Acting Insulins	Thyroid Hormones	868	1521317	0.06%	774	273975	0.28%
04030300	06010101	Selective Serotonin Re-Uptake Inhibitors (SSRI)	Short-Acting Insulins	858	1521317	0.06%	774	273975	0.28%
04010201	13040000	Benzodiazepines	Topical Corticosteroids	1118	1521317	0.07%	773	273975	0.28%
05010201	05011100	Cephalosporins	Metronidazole And Tinidazole	2684	1521317	0.18%	770	273975	0.28%
01030100	04020101	H2-Receptor Antagonists	First-Generation Antipsychotic Drugs	1968	1521317	0.13%	769	273975	0.28%
04030300	06010102	Selective Serotonin Re-Uptake Inhibitors (SSRI)	Intermediate- And Long-Acting Insulins	861	1521317	0.06%	766	273975	0.28%
04070100	12010151	Non-Opioid And Compound Analgesics	Anti-Inflammatory Preparations	2004	1521317	0.13%	765	273975	0.28%
03040101	04060000	Non-Sedating Antihistamines	Products Used Against Nausea And Vertigo	1384	1521317	0.09%	764	273975	0.28%
01020200	07020250	Other Antispasmodics	Preparations For Vaginal And Vulval Candidiasis	1690	1521317	0.11%	763	273975	0.28%
03040101	05010500	Non-Sedating Antihistamines	Macrolides	1426	1521317	0.09%	761	273975	0.28%
03040101	13020100	Non-Sedating Antihistamines	Emollients	1629	1521317	0.11%	759	273975	0.28%
01030100	12020101	H2-Receptor Antagonists	Corticosteroids Used In Nasal Allergy	1523	1521317	0.10%	759	273975	0.28%
04030100	05010201	Tricyclic And Related Antidepressants	Cephalosporins	1183	1521317	0.08%	759	273975	0.28%
05010101	05010201	Benzylpenicillin And Phenoxymethylpenicillin	Cephalosporins	2564	1521317	0.17%	754	273975	0.28%
02040000	13040000	Beta-Adrenoceptor Blockers	Topical Corticosteroids	1215	1521317	0.08%	751	273975	0.27%
01060400	11040200	Osmotic Laxatives	Other Anti-Inflammatory Eye Preparations (For The Eye)	1762	1521317	0.12%	749	273975	0.27%
04010100	04020102	Hypnotics	Second-Generation Antipsychotic Drugs	807	1521317	0.05%	747	273975	0.27%
04070100	12030100	Non-Opioid And Compound Analgesics	Drugs For Oral Ulceration And Inflammation	2199	1521317	0.14%	746	273975	0.27%
05010103	06040102	Broad-Spectrum Penicillins	Progestogens And Progesterone Receptor Modulators	1971	1521317	0.13%	745	273975	0.27%
09010101	13030000	Oral Iron	Topical Local Anaesthetics And Antipruritics	2808	1521317	0.18%	743	273975	0.27%
01010201	13040200	Compound Alginate Preparations	Mild Topical Corticosteroids	2422	1521317	0.16%	743	273975	0.27%
03020000	06020100	Corticosteroids (For Respiratory Conditions)	Thyroid Hormones	851	1521317	0.06%	743	273975	0.27%
09010101	13040200	Oral Iron	Mild Topical Corticosteroids	2939	1521317	0.19%	741	273975	0.27%
04105100	13040000	Substance Dependence - Nicotine Dependence	Topical Corticosteroids	1888	1521317	0.12%	739	273975	0.27%
03010101	09060400	Selective Beta 2 Agonists	Vitamin D	1129	1521317	0.07%	738	273975	0.27%
04030300	04070401	Selective Serotonin Re-Uptake Inhibitors (SSRI)	Acute Migraine	871	1521317	0.06%	735	273975	0.27%
03040102	13020100	Sedating Antihistamines	Emollients	2106	1521317	0.14%	733	273975	0.27%
01060400	04105100	Osmotic Laxatives	Substance Dependence - Nicotine Dependence	1881	1521317	0.12%	733	273975	0.27%
04030400	04060000	Other Antidepressants	Products Used Against Nausea And Vertigo	893	1521317	0.06%	733	273975	0.27%
01010101	07020250	Aluminium- And Magnesium- Containing Antacids	Preparations For Vaginal And Vulval Candidiasis	2653	1521317	0.17%	732	273975	0.27%
04070100	05010300	Non-Opioid And Compound Analgesics	Tetracyclines	1609	1521317	0.11%	732	273975	0.27%
05010103	12030100	Broad-Spectrum Penicillins	Drugs For Oral Ulceration And Inflammation	2189	1521317	0.14%	731	273975	0.27%
01010201	09060400	Compound Alginate Preparations	Vitamin D	2061	1521317	0.14%	731	273975	0.27%
06010102	06020100	Intermediate- And Long-Acting Insulins	Thyroid Hormones	816	1521317	0.05%	731	273975	0.27%
09010101	10030250	Oral Iron	Topical Nsaids And Counter Irritants	2479	1521317	0.16%	730	273975	0.27%
01030100	04065500	H2-Receptor Antagonists	Products Used Against Nausea And Vertigo - Domperidone & Metoclopramide	1831	1521317	0.12%	730	273975	0.27%
02090000	04060000	Antiplatelet Products	Products Used Against Nausea And Vertigo	1689	1521317	0.11%	729	273975	0.27%
07020250	09060400	Preparations For Vaginal And Vulval Candidiasis	Vitamin D	1863	1521317	0.12%	727	273975	0.27%
01010201	06010102	Compound Alginate Preparations	Intermediate- And Long-Acting Insulins	1181	1521317	0.08%	727	273975	0.27%
06020100	13020102	Thyroid Hormones	Emollient Skin Preparations	1082	1521317	0.07%	725	273975	0.26%
02080100	09010101	Parenteral Anticoagulants	Oral Iron	1780	1521317	0.12%	724	273975	0.26%
06040103	12020101	Progestogen Products Doubling (In House Use)	Corticosteroids Used In Nasal Allergy	1795	1521317	0.12%	723	273975	0.26%
01030100	02090000	H2-Receptor Antagonists	Antiplatelet Products	1547	1521317	0.10%	723	273975	0.26%
04010100	10010100	Hypnotics	Non-Steroidal Anti-Inflammatory Drugs	1162	1521317	0.08%	722	273975	0.26%
01060100	05010201	Bulk-Forming Laxatives	Cephalosporins	1954	1521317	0.13%	721	273975	0.26%
01060400	02040000	Osmotic Laxatives	Beta-Adrenoceptor Blockers	1209	1521317	0.08%	721	273975	0.26%
05010500	13020102	Macrolides	Emollient Skin Preparations	1713	1521317	0.11%	720	273975	0.26%
03020000	05010102	Corticosteroids (For Respiratory Conditions)	Penicillinase-Resistant Penicillins	1277	1521317	0.08%	720	273975	0.26%
06010202	06020100	Biguanides (Metformin)	Thyroid Hormones	882	1521317	0.06%	719	273975	0.26%
01010101	05010103	Aluminium- And Magnesium- Containing Antacids	Broad-Spectrum Penicillins	2661	1521317	0.17%	715	273975	0.26%
13020102	13020103	Emollient Skin Preparations	Antimicrobial Emollients	1762	1521317	0.12%	715	273975	0.26%
01060400	05010101	Osmotic Laxatives	Benzylpenicillin And Phenoxymethylpenicillin	2171	1521317	0.14%	714	273975	0.26%
05010103	14040800	Broad-Spectrum Penicillins	Vaccines And Antisera - Diphtheria Vaccines	2579	1521317	0.17%	712	273975	0.26%
03020000	13020101	Corticosteroids (For Respiratory Conditions)	Emollient Bath Additives And Shower Preparations	1104	1521317	0.07%	711	273975	0.26%
04010201	04020102	Benzodiazepines	Second-Generation Antipsychotic Drugs	751	1521317	0.05%	710	273975	0.26%
03010101	13020103	Selective Beta 2 Agonists	Antimicrobial Emollients	1115	1521317	0.07%	709	273975	0.26%
04030400	06040103	Other Antidepressants	Progestogen Products Doubling (In House Use)	940	1521317	0.06%	708	273975	0.26%
03040101	10010100	Non-Sedating Antihistamines	Non-Steroidal Anti-Inflammatory Drugs	1417	1521317	0.09%	707	273975	0.26%
01020200	03010101	Other Antispasmodics	Selective Beta 2 Agonists	1010	1521317	0.07%	707	273975	0.26%
04070401	05010103	Acute Migraine	Broad-Spectrum Penicillins	1254	1521317	0.08%	705	273975	0.26%
11040200	13020102	Other Anti-Inflammatory Eye Preparations (For The Eye)	Emollient Skin Preparations	1463	1521317	0.10%	704	273975	0.26%
05010201	13020100	Cephalosporins	Emollients	2110	1521317	0.14%	702	273975	0.26%
09010101	13020103	Oral Iron	Antimicrobial Emollients	2060	1521317	0.14%	699	273975	0.26%
01070200	12020101	Compound Haemorrhoid Products With Corticosteroids	Corticosteroids Used In Nasal Allergy	1616	1521317	0.11%	699	273975	0.26%
02080100	02090000	Parenteral Anticoagulants	Antiplatelet Products	1645	1521317	0.11%	698	273975	0.25%
01030500	03040102	Proton Pump Inhibitors	Sedating Antihistamines	1195	1521317	0.08%	698	273975	0.25%
02040000	04030400	Beta-Adrenoceptor Blockers	Other Antidepressants	818	1521317	0.05%	697	273975	0.25%
01030100	03040101	H2-Receptor Antagonists	Non-Sedating Antihistamines	1200	1521317	0.08%	694	273975	0.25%
07020250	09010200	Preparations For Vaginal And Vulval Candidiasis	Drugs Used In Megaloblastic Anaemias	1700	1521317	0.11%	693	273975	0.25%
04030300	09060400	Selective Serotonin Re-Uptake Inhibitors (SSRI)	Vitamin D	891	1521317	0.06%	693	273975	0.25%
04070401	09010101	Acute Migraine	Oral Iron	1372	1521317	0.09%	691	273975	0.25%
01050200	13020102	Corticosteroids In Chronic Bowel Problems	Emollient Skin Preparations	1070	1521317	0.07%	691	273975	0.25%
01070000	03010101	Local Products For Anal Or Rectal Problems	Selective Beta 2 Agonists	1325	1521317	0.09%	688	273975	0.25%
05010103	10030250	Broad-Spectrum Penicillins	Topical Nsaids And Counter Irritants	1906	1521317	0.13%	687	273975	0.25%
03040101	05010102	Non-Sedating Antihistamines	Penicillinase-Resistant Penicillins	1523	1521317	0.10%	686	273975	0.25%
01020200	01030500	Other Antispasmodics	Proton Pump Inhibitors	1143	1521317	0.08%	686	273975	0.25%
01060100	01070200	Bulk-Forming Laxatives	Compound Haemorrhoid Products With Corticosteroids	2270	1521317	0.15%	685	273975	0.25%
05010103	05010300	Broad-Spectrum Penicillins	Tetracyclines	1745	1521317	0.11%	685	273975	0.25%
01030500	05010800	Proton Pump Inhibitors	Sulphonamides And Trimethoprim	1383	1521317	0.09%	685	273975	0.25%
01030500	05010102	Proton Pump Inhibitors	Penicillinase-Resistant Penicillins	1327	1521317	0.09%	685	273975	0.25%
04065500	13040000	Products Used Against Nausea And Vertigo - Domperidone & Metoclopramide	Topical Corticosteroids	1692	1521317	0.11%	683	273975	0.25%
10010100	12020101	Non-Steroidal Anti-Inflammatory Drugs	Corticosteroids Used In Nasal Allergy	1415	1521317	0.09%	681	273975	0.25%
06010202	13040000	Biguanides (Metformin)	Topical Corticosteroids	1136	1521317	0.07%	681	273975	0.25%
12020101	13020100	Corticosteroids Used In Nasal Allergy	Emollients	1384	1521317	0.09%	680	273975	0.25%
01040200	04060000	Antimotility Products	Products Used Against Nausea And Vertigo	1412	1521317	0.09%	678	273975	0.25%
04030100	04030400	Tricyclic And Related Antidepressants	Other Antidepressants	803	1521317	0.05%	678	273975	0.25%
01010201	10030250	Compound Alginate Preparations	Topical Nsaids And Counter Irritants	1882	1521317	0.12%	677	273975	0.25%
01040200	04070200	Antimotility Products	Opioid Analgesics	1089	1521317	0.07%	677	273975	0.25%
03010000	13040000	Bronchodilators	Topical Corticosteroids	1161	1521317	0.08%	676	273975	0.25%
09010101	12010151	Oral Iron	Anti-Inflammatory Preparations	2383	1521317	0.16%	675	273975	0.25%
04020101	04030400	First-Generation Antipsychotic Drugs	Other Antidepressants	779	1521317	0.05%	675	273975	0.25%
05010103	13040200	Broad-Spectrum Penicillins	Mild Topical Corticosteroids	2242	1521317	0.15%	674	273975	0.25%
01020200	01060400	Other Antispasmodics	Osmotic Laxatives	1396	1521317	0.09%	674	273975	0.25%
05010102	13100101	Penicillinase-Resistant Penicillins	Antibacterial Preparations Only Used Topically	2362	1521317	0.16%	673	273975	0.25%
03010101	06010101	Selective Beta 2 Agonists	Short-Acting Insulins	829	1521317	0.05%	673	273975	0.25%
05010500	10010100	Macrolides	Non-Steroidal Anti-Inflammatory Drugs	1577	1521317	0.10%	672	273975	0.25%
03020000	10010100	Corticosteroids (For Respiratory Conditions)	Non-Steroidal Anti-Inflammatory Drugs	1159	1521317	0.08%	668	273975	0.24%
03040102	11040200	Sedating Antihistamines	Other Anti-Inflammatory Eye Preparations (For The Eye)	1906	1521317	0.13%	667	273975	0.24%
04010201	05010201	Benzodiazepines	Cephalosporins	1045	1521317	0.07%	667	273975	0.24%
04105100	05010201	Substance Dependence - Nicotine Dependence	Cephalosporins	1997	1521317	0.13%	665	273975	0.24%
05010103	05020100	Broad-Spectrum Penicillins	Triazole Antifungals	1696	1521317	0.11%	665	273975	0.24%
01030100	03020000	H2-Receptor Antagonists	Corticosteroids (For Respiratory Conditions)	1165	1521317	0.08%	665	273975	0.24%
01050200	01060400	Corticosteroids In Chronic Bowel Problems	Osmotic Laxatives	1137	1521317	0.07%	665	273975	0.24%
05010102	12020101	Penicillinase-Resistant Penicillins	Corticosteroids Used In Nasal Allergy	1468	1521317	0.10%	662	273975	0.24%
01010201	06040102	Compound Alginate Preparations	Progestogens And Progesterone Receptor Modulators	1835	1521317	0.12%	661	273975	0.24%
05011100	13040000	Metronidazole And Tinidazole	Topical Corticosteroids	1833	1521317	0.12%	661	273975	0.24%
04070100	04070300	Non-Opioid And Compound Analgesics	Neuropathic Pain	901	1521317	0.06%	660	273975	0.24%
04020102	09010101	Second-Generation Antipsychotic Drugs	Oral Iron	767	1521317	0.05%	660	273975	0.24%
04020102	05010103	Second-Generation Antipsychotic Drugs	Broad-Spectrum Penicillins	748	1521317	0.05%	654	273975	0.24%
04030300	09010200	Selective Serotonin Re-Uptake Inhibitors (SSRI)	Drugs Used In Megaloblastic Anaemias	912	1521317	0.06%	652	273975	0.24%
01010201	09010200	Compound Alginate Preparations	Drugs Used In Megaloblastic Anaemias	1590	1521317	0.10%	649	273975	0.24%
01010201	13030000	Compound Alginate Preparations	Topical Local Anaesthetics And Antipruritics	2074	1521317	0.14%	648	273975	0.24%
01030500	06010202	Proton Pump Inhibitors	Biguanides (Metformin)	900	1521317	0.06%	648	273975	0.24%
04030400	05010201	Other Antidepressants	Cephalosporins	800	1521317	0.05%	646	273975	0.24%
03020000	04030100	Corticosteroids (For Respiratory Conditions)	Tricyclic And Related Antidepressants	762	1521317	0.05%	646	273975	0.24%
04020101	12020101	First-Generation Antipsychotic Drugs	Corticosteroids Used In Nasal Allergy	1356	1521317	0.09%	645	273975	0.24%
03040102	04060000	Sedating Antihistamines	Products Used Against Nausea And Vertigo	1626	1521317	0.11%	644	273975	0.24%
02090000	12020101	Antiplatelet Products	Corticosteroids Used In Nasal Allergy	1157	1521317	0.08%	644	273975	0.24%
07020250	12010151	Preparations For Vaginal And Vulval Candidiasis	Anti-Inflammatory Preparations	1911	1521317	0.13%	643	273975	0.23%
03010101	05010300	Selective Beta 2 Agonists	Tetracyclines	1104	1521317	0.07%	643	273975	0.23%
01060200	03010101	Stimulant Laxatives	Selective Beta 2 Agonists	985	1521317	0.06%	640	273975	0.23%
03010101	06010102	Selective Beta 2 Agonists	Intermediate- And Long-Acting Insulins	789	1521317	0.05%	640	273975	0.23%
05010103	13020103	Broad-Spectrum Penicillins	Antimicrobial Emollients	1599	1521317	0.11%	637	273975	0.23%
07020250	13020103	Preparations For Vaginal And Vulval Candidiasis	Antimicrobial Emollients	1687	1521317	0.11%	636	273975	0.23%
03040101	04070200	Non-Sedating Antihistamines	Opioid Analgesics	888	1521317	0.06%	636	273975	0.23%
09010101	12030100	Oral Iron	Drugs For Oral Ulceration And Inflammation	2296	1521317	0.15%	635	273975	0.23%
04010201	04060000	Benzodiazepines	Products Used Against Nausea And Vertigo	891	1521317	0.06%	635	273975	0.23%
03010101	04020102	Selective Beta 2 Agonists	Second-Generation Antipsychotic Drugs	657	1521317	0.04%	633	273975	0.23%
03020000	04070200	Corticosteroids (For Respiratory Conditions)	Opioid Analgesics	856	1521317	0.06%	632	273975	0.23%
04030400	10010100	Other Antidepressants	Non-Steroidal Anti-Inflammatory Drugs	745	1521317	0.05%	632	273975	0.23%
01030500	01070200	Proton Pump Inhibitors	Compound Haemorrhoid Products With Corticosteroids	1265	1521317	0.08%	629	273975	0.23%
04030300	12010151	Selective Serotonin Re-Uptake Inhibitors (SSRI)	Anti-Inflammatory Preparations	888	1521317	0.06%	627	273975	0.23%
03010101	09010200	Selective Beta 2 Agonists	Drugs Used In Megaloblastic Anaemias	943	1521317	0.06%	624	273975	0.23%
03090200	05010103	Demulcent And Expectorant Cough Preparations	Broad-Spectrum Penicillins	2394	1521317	0.16%	622	273975	0.23%
06040101	06040102	Oestrogens And HRT	Progestogens And Progesterone Receptor Modulators	1829	1521317	0.12%	622	273975	0.23%
04060000	05010500	Products Used Against Nausea And Vertigo	Macrolides	1462	1521317	0.10%	621	273975	0.23%
01040200	03020000	Antimotility Products	Corticosteroids (For Respiratory Conditions)	952	1521317	0.06%	621	273975	0.23%
02040000	04010201	Beta-Adrenoceptor Blockers	Benzodiazepines	823	1521317	0.05%	617	273975	0.23%
05010800	06040103	Sulphonamides And Trimethoprim	Progestogen Products Doubling (In House Use)	2488	1521317	0.16%	616	273975	0.22%
13040000	13040200	Topical Corticosteroids	Mild Topical Corticosteroids	1816	1521317	0.12%	616	273975	0.22%
04060000	06020100	Products Used Against Nausea And Vertigo	Thyroid Hormones	924	1521317	0.06%	616	273975	0.22%
07020250	10030250	Preparations For Vaginal And Vulval Candidiasis	Topical Nsaids And Counter Irritants	1698	1521317	0.11%	615	273975	0.22%
02040000	05010201	Beta-Adrenoceptor Blockers	Cephalosporins	1046	1521317	0.07%	615	273975	0.22%
03020000	04010100	Corticosteroids (For Respiratory Conditions)	Hypnotics	833	1521317	0.05%	615	273975	0.22%
05011300	12020101	Urinary-Tract Infections	Corticosteroids Used In Nasal Allergy	1302	1521317	0.09%	614	273975	0.22%
04020101	04070200	First-Generation Antipsychotic Drugs	Opioid Analgesics	1206	1521317	0.08%	614	273975	0.22%
04030100	04060000	Tricyclic And Related Antidepressants	Products Used Against Nausea And Vertigo	875	1521317	0.06%	614	273975	0.22%
06040102	07020250	Progestogens And Progesterone Receptor Modulators	Preparations For Vaginal And Vulval Candidiasis	1608	1521317	0.11%	613	273975	0.22%
01030100	04065400	H2-Receptor Antagonists	Products Used Against Nausea And Vertigo - Antihistamines	1682	1521317	0.11%	611	273975	0.22%
05010201	11040200	Cephalosporins	Other Anti-Inflammatory Eye Preparations (For The Eye)	1605	1521317	0.11%	611	273975	0.22%
05010102	06040103	Penicillinase-Resistant Penicillins	Progestogen Products Doubling (In House Use)	2514	1521317	0.17%	610	273975	0.22%
01010201	13100300	Compound Alginate Preparations	Antiviral Preparations (Topical	1834	1521317	0.12%	608	273975	0.22%
07020250	14040800	Preparations For Vaginal And Vulval Candidiasis	Vaccines And Antisera - Diphtheria Vaccines	2301	1521317	0.15%	607	273975	0.22%
03020000	04020101	Corticosteroids (For Respiratory Conditions)	First-Generation Antipsychotic Drugs	1046	1521317	0.07%	607	273975	0.22%
03040102	13020101	Sedating Antihistamines	Emollient Bath Additives And Shower Preparations	1475	1521317	0.10%	604	273975	0.22%
09010101	09060700	Oral Iron	Multivitamin And Multimineral Preparations	1990	1521317	0.13%	602	273975	0.22%
06040103	13020102	Progestogen Products Doubling (In House Use)	Emollient Skin Preparations	1881	1521317	0.12%	602	273975	0.22%
01070000	13040000	Local Products For Anal Or Rectal Problems	Topical Corticosteroids	1773	1521317	0.12%	602	273975	0.22%
04070100	04080100	Non-Opioid And Compound Analgesics	Control Of Epilepsy	858	1521317	0.06%	602	273975	0.22%
01070200	13020102	Compound Haemorrhoid Products With Corticosteroids	Emollient Skin Preparations	1637	1521317	0.11%	601	273975	0.22%
02080100	05010103	Parenteral Anticoagulants	Broad-Spectrum Penicillins	1238	1521317	0.08%	599	273975	0.22%
01050100	09010101	Aminosalicylates	Oral Iron	1114	1521317	0.07%	598	273975	0.22%
06020100	06040103	Thyroid Hormones	Progestogen Products Doubling (In House Use)	986	1521317	0.06%	598	273975	0.22%
02090000	03020000	Antiplatelet Products	Corticosteroids (For Respiratory Conditions)	924	1521317	0.06%	598	273975	0.22%
01010201	12010151	Compound Alginate Preparations	Anti-Inflammatory Preparations	1797	1521317	0.12%	594	273975	0.22%
01070000	04030300	Local Products For Anal Or Rectal Problems	Selective Serotonin Re-Uptake Inhibitors (SSRI)	924	1521317	0.06%	594	273975	0.22%
01040200	12020101	Antimotility Products	Corticosteroids Used In Nasal Allergy	1059	1521317	0.07%	592	273975	0.22%
04030100	06040103	Tricyclic And Related Antidepressants	Progestogen Products Doubling (In House Use)	1066	1521317	0.07%	591	273975	0.22%
01070200	03020000	Compound Haemorrhoid Products With Corticosteroids	Corticosteroids (For Respiratory Conditions)	1094	1521317	0.07%	590	273975	0.22%
07020250	13030000	Preparations For Vaginal And Vulval Candidiasis	Topical Local Anaesthetics And Antipruritics	1896	1521317	0.12%	589	273975	0.21%
05010500	05011300	Macrolides	Urinary-Tract Infections	1502	1521317	0.10%	589	273975	0.21%
04070100	13030000	Non-Opioid And Compound Analgesics	Topical Local Anaesthetics And Antipruritics	1733	1521317	0.11%	588	273975	0.21%
01010201	01070100	Compound Alginate Preparations	Soothing Haemorrhoid Products	2060	1521317	0.14%	587	273975	0.21%
01010201	04070401	Compound Alginate Preparations	Acute Migraine	1114	1521317	0.07%	587	273975	0.21%
05010103	13030000	Broad-Spectrum Penicillins	Topical Local Anaesthetics And Antipruritics	1882	1521317	0.12%	586	273975	0.21%
04010201	04020101	Benzodiazepines	First-Generation Antipsychotic Drugs	793	1521317	0.05%	586	273975	0.21%
07020250	12030100	Preparations For Vaginal And Vulval Candidiasis	Drugs For Oral Ulceration And Inflammation	1731	1521317	0.11%	585	273975	0.21%
05010103	13100300	Broad-Spectrum Penicillins	Antiviral Preparations (Topical	1634	1521317	0.11%	584	273975	0.21%
04070401	07020250	Acute Migraine	Preparations For Vaginal And Vulval Candidiasis	1080	1521317	0.07%	584	273975	0.21%
02040000	03010101	Beta-Adrenoceptor Blockers	Selective Beta 2 Agonists	806	1521317	0.05%	583	273975	0.21%
07020250	13100300	Preparations For Vaginal And Vulval Candidiasis	Antiviral Preparations (Topical	1775	1521317	0.12%	582	273975	0.21%
05010102	10010100	Penicillinase-Resistant Penicillins	Non-Steroidal Anti-Inflammatory Drugs	1639	1521317	0.11%	582	273975	0.21%
02040000	04060000	Beta-Adrenoceptor Blockers	Products Used Against Nausea And Vertigo	937	1521317	0.06%	581	273975	0.21%
06010101	13040000	Short-Acting Insulins	Topical Corticosteroids	852	1521317	0.06%	581	273975	0.21%
02090000	09060400	Antiplatelet Products	Vitamin D	1305	1521317	0.09%	579	273975	0.21%
01030100	04070200	H2-Receptor Antagonists	Opioid Analgesics	953	1521317	0.06%	579	273975	0.21%
13030000	13040000	Topical Local Anaesthetics And Antipruritics	Topical Corticosteroids	1960	1521317	0.13%	578	273975	0.21%
04070100	06040102	Non-Opioid And Compound Analgesics	Progestogens And Progesterone Receptor Modulators	1260	1521317	0.08%	578	273975	0.21%
05010500	06040103	Macrolides	Progestogen Products Doubling (In House Use)	2115	1521317	0.14%	577	273975	0.21%
04010100	06040103	Hypnotics	Progestogen Products Doubling (In House Use)	1192	1521317	0.08%	577	273975	0.21%
04065400	12020101	Products Used Against Nausea And Vertigo - Antihistamines	Corticosteroids Used In Nasal Allergy	1263	1521317	0.08%	576	273975	0.21%
09010101	13100300	Oral Iron	Antiviral Preparations (Topical	1938	1521317	0.13%	574	273975	0.21%
04070200	06040103	Opioid Analgesics	Progestogen Products Doubling (In House Use)	1119	1521317	0.07%	574	273975	0.21%
03090200	04070100	Demulcent And Expectorant Cough Preparations	Non-Opioid And Compound Analgesics	1926	1521317	0.13%	572	273975	0.21%
13040000	13090100	Topical Corticosteroids	Shampoos And Other Scalp Preparations	1137	1521317	0.07%	572	273975	0.21%
02080100	04070100	Parenteral Anticoagulants	Non-Opioid And Compound Analgesics	1090	1521317	0.07%	572	273975	0.21%
03010000	04030300	Bronchodilators	Selective Serotonin Re-Uptake Inhibitors (SSRI)	706	1521317	0.05%	572	273975	0.21%
01010201	12030100	Compound Alginate Preparations	Drugs For Oral Ulceration And Inflammation	1795	1521317	0.12%	571	273975	0.21%
05010800	10010100	Sulphonamides And Trimethoprim	Non-Steroidal Anti-Inflammatory Drugs	1427	1521317	0.09%	571	273975	0.21%
01040200	10010100	Antimotility Products	Non-Steroidal Anti-Inflammatory Drugs	1209	1521317	0.08%	571	273975	0.21%
04070200	05010500	Opioid Analgesics	Macrolides	898	1521317	0.06%	570	273975	0.21%
03010000	12020101	Bronchodilators	Corticosteroids Used In Nasal Allergy	922	1521317	0.06%	569	273975	0.21%
02040000	04030100	Beta-Adrenoceptor Blockers	Tricyclic And Related Antidepressants	761	1521317	0.05%	568	273975	0.21%
04030300	04080100	Selective Serotonin Re-Uptake Inhibitors (SSRI)	Control Of Epilepsy	618	1521317	0.04%	568	273975	0.21%
01060400	13100101	Osmotic Laxatives	Antibacterial Preparations Only Used Topically	1483	1521317	0.10%	567	273975	0.21%
04070100	13100300	Non-Opioid And Compound Analgesics	Antiviral Preparations (Topical	1441	1521317	0.09%	567	273975	0.21%
01030100	13020102	H2-Receptor Antagonists	Emollient Skin Preparations	1356	1521317	0.09%	566	273975	0.21%
04060000	05010102	Products Used Against Nausea And Vertigo	Penicillinase-Resistant Penicillins	1414	1521317	0.09%	564	273975	0.21%
13020101	13020103	Emollient Bath Additives And Shower Preparations	Antimicrobial Emollients	1270	1521317	0.08%	564	273975	0.21%
03020000	05011300	Corticosteroids (For Respiratory Conditions)	Urinary-Tract Infections	1012	1521317	0.07%	563	273975	0.21%
04010201	06040103	Benzodiazepines	Progestogen Products Doubling (In House Use)	961	1521317	0.06%	563	273975	0.21%
06010102	13040000	Intermediate- And Long-Acting Insulins	Topical Corticosteroids	840	1521317	0.06%	563	273975	0.21%
02040000	04010100	Beta-Adrenoceptor Blockers	Hypnotics	781	1521317	0.05%	563	273975	0.21%
05010101	12020101	Benzylpenicillin And Phenoxymethylpenicillin	Corticosteroids Used In Nasal Allergy	1382	1521317	0.09%	562	273975	0.21%
04020102	07020250	Second-Generation Antipsychotic Drugs	Preparations For Vaginal And Vulval Candidiasis	650	1521317	0.04%	562	273975	0.21%
09010101	13060102	Oral Iron	Topical Antibacterials For Acne	2107	1521317	0.14%	561	273975	0.20%
12020101	13020101	Corticosteroids Used In Nasal Allergy	Emollient Bath Additives And Shower Preparations	910	1521317	0.06%	561	273975	0.20%
01010201	13020103	Compound Alginate Preparations	Antimicrobial Emollients	1432	1521317	0.09%	560	273975	0.20%
04010100	04065500	Hypnotics	Products Used Against Nausea And Vertigo - Domperidone & Metoclopramide	1173	1521317	0.08%	560	273975	0.20%
03010101	14040800	Selective Beta 2 Agonists	Vaccines And Antisera - Diphtheria Vaccines	1242	1521317	0.08%	559	273975	0.20%
03010101	06040102	Selective Beta 2 Agonists	Progestogens And Progesterone Receptor Modulators	925	1521317	0.06%	558	273975	0.20%
06020100	10010100	Thyroid Hormones	Non-Steroidal Anti-Inflammatory Drugs	792	1521317	0.05%	558	273975	0.20%
03020000	05010101	Corticosteroids (For Respiratory Conditions)	Benzylpenicillin And Phenoxymethylpenicillin	1180	1521317	0.08%	557	273975	0.20%
01030500	09060400	Proton Pump Inhibitors	Vitamin D	929	1521317	0.06%	555	273975	0.20%
04070100	13040200	Non-Opioid And Compound Analgesics	Mild Topical Corticosteroids	1540	1521317	0.10%	554	273975	0.20%
04070100	05020100	Non-Opioid And Compound Analgesics	Triazole Antifungals	1218	1521317	0.08%	554	273975	0.20%
02040000	06020100	Beta-Adrenoceptor Blockers	Thyroid Hormones	655	1521317	0.04%	554	273975	0.20%
04020101	04030100	First-Generation Antipsychotic Drugs	Tricyclic And Related Antidepressants	784	1521317	0.05%	553	273975	0.20%
01070100	07020250	Soothing Haemorrhoid Products	Preparations For Vaginal And Vulval Candidiasis	1825	1521317	0.12%	551	273975	0.20%
01060100	12020101	Bulk-Forming Laxatives	Corticosteroids Used In Nasal Allergy	1119	1521317	0.07%	551	273975	0.20%
03040101	04030100	Non-Sedating Antihistamines	Tricyclic And Related Antidepressants	708	1521317	0.05%	551	273975	0.20%
03040101	04010100	Non-Sedating Antihistamines	Hypnotics	811	1521317	0.05%	550	273975	0.20%
10010100	13020102	Non-Steroidal Anti-Inflammatory Drugs	Emollient Skin Preparations	1303	1521317	0.09%	549	273975	0.20%
03010101	04070401	Selective Beta 2 Agonists	Acute Migraine	699	1521317	0.05%	549	273975	0.20%
03020000	04065400	Corticosteroids (For Respiratory Conditions)	Products Used Against Nausea And Vertigo - Antihistamines	962	1521317	0.06%	548	273975	0.20%
01040200	04030100	Antimotility Products	Tricyclic And Related Antidepressants	771	1521317	0.05%	548	273975	0.20%
09010101	09050101	Oral Iron	Calcium Supplements	1766	1521317	0.12%	547	273975	0.20%
09010101	13090000	Oral Iron	Shampoos And Other Preparations For Scalp And Hair Conditions	1432	1521317	0.09%	547	273975	0.20%
02090000	13020102	Antiplatelet Products	Emollient Skin Preparations	1191	1521317	0.08%	546	273975	0.20%
07020250	13100200	Preparations For Vaginal And Vulval Candidiasis	Antifungal Preparations (Topical	1991	1521317	0.13%	545	273975	0.20%
01060100	01060200	Bulk-Forming Laxatives	Stimulant Laxatives	1407	1521317	0.09%	545	273975	0.20%
01030500	01060200	Proton Pump Inhibitors	Stimulant Laxatives	879	1521317	0.06%	544	273975	0.20%
01060400	05011100	Osmotic Laxatives	Metronidazole And Tinidazole	1636	1521317	0.11%	542	273975	0.20%
01010201	14040800	Compound Alginate Preparations	Vaccines And Antisera - Diphtheria Vaccines	1923	1521317	0.13%	541	273975	0.20%
05010300	07020250	Tetracyclines	Preparations For Vaginal And Vulval Candidiasis	1419	1521317	0.09%	539	273975	0.20%
03020000	04030400	Corticosteroids (For Respiratory Conditions)	Other Antidepressants	576	1521317	0.04%	537	273975	0.20%
03010101	10030250	Selective Beta 2 Agonists	Topical Nsaids And Counter Irritants	900	1521317	0.06%	536	273975	0.20%
04030300	14040800	Selective Serotonin Re-Uptake Inhibitors (SSRI)	Vaccines And Antisera - Diphtheria Vaccines	797	1521317	0.05%	536	273975	0.20%
07020250	13060102	Preparations For Vaginal And Vulval Candidiasis	Topical Antibacterials For Acne	1880	1521317	0.12%	535	273975	0.20%
04070200	12020101	Opioid Analgesics	Corticosteroids Used In Nasal Allergy	791	1521317	0.05%	535	273975	0.20%
04070100	13020103	Non-Opioid And Compound Analgesics	Antimicrobial Emollients	1197	1521317	0.08%	534	273975	0.19%
01070200	04060000	Compound Haemorrhoid Products With Corticosteroids	Products Used Against Nausea And Vertigo	1333	1521317	0.09%	533	273975	0.19%
04010100	05010500	Hypnotics	Macrolides	891	1521317	0.06%	533	273975	0.19%
04010100	12020101	Hypnotics	Corticosteroids Used In Nasal Allergy	887	1521317	0.06%	533	273975	0.19%
01070100	09010101	Soothing Haemorrhoid Products	Oral Iron	2112	1521317	0.14%	531	273975	0.19%
04070100	09060700	Non-Opioid And Compound Analgesics	Multivitamin And Multimineral Preparations	1275	1521317	0.08%	531	273975	0.19%
01060200	13040000	Stimulant Laxatives	Topical Corticosteroids	1179	1521317	0.08%	531	273975	0.19%
04060000	05010800	Products Used Against Nausea And Vertigo	Sulphonamides And Trimethoprim	1432	1521317	0.09%	530	273975	0.19%
05010103	13090000	Broad-Spectrum Penicillins	Shampoos And Other Preparations For Scalp And Hair Conditions	1207	1521317	0.08%	530	273975	0.19%
04030300	10030250	Selective Serotonin Re-Uptake Inhibitors (SSRI)	Topical Nsaids And Counter Irritants	748	1521317	0.05%	530	273975	0.19%
04020101	05011300	First-Generation Antipsychotic Drugs	Urinary-Tract Infections	1368	1521317	0.09%	529	273975	0.19%
01030100	05011300	H2-Receptor Antagonists	Urinary-Tract Infections	1231	1521317	0.08%	529	273975	0.19%
03040102	05010500	Sedating Antihistamines	Macrolides	1192	1521317	0.08%	528	273975	0.19%
05010201	13100101	Cephalosporins	Antibacterial Preparations Only Used Topically	1526	1521317	0.10%	527	273975	0.19%
04060000	10010100	Products Used Against Nausea And Vertigo	Non-Steroidal Anti-Inflammatory Drugs	1212	1521317	0.08%	527	273975	0.19%
01060400	13020101	Osmotic Laxatives	Emollient Bath Additives And Shower Preparations	1189	1521317	0.08%	527	273975	0.19%
04030100	12020101	Tricyclic And Related Antidepressants	Corticosteroids Used In Nasal Allergy	698	1521317	0.05%	527	273975	0.19%
04070100	13090000	Non-Opioid And Compound Analgesics	Shampoos And Other Preparations For Scalp And Hair Conditions	1086	1521317	0.07%	526	273975	0.19%
04030000	04070100	Antidepressants	Non-Opioid And Compound Analgesics	650	1521317	0.04%	526	273975	0.19%
05011100	06040103	Metronidazole And Tinidazole	Progestogen Products Doubling (In House Use)	2135	1521317	0.14%	524	273975	0.19%
03090200	09010101	Demulcent And Expectorant Cough Preparations	Oral Iron	2224	1521317	0.15%	523	273975	0.19%
05011300	13020102	Urinary-Tract Infections	Emollient Skin Preparations	1318	1521317	0.09%	523	273975	0.19%
03020000	05010800	Corticosteroids (For Respiratory Conditions)	Sulphonamides And Trimethoprim	972	1521317	0.06%	523	273975	0.19%
04080100	09010101	Control Of Epilepsy	Oral Iron	927	1521317	0.06%	523	273975	0.19%
04065400	05011300	Products Used Against Nausea And Vertigo - Antihistamines	Urinary-Tract Infections	1512	1521317	0.10%	522	273975	0.19%
01030100	05010500	H2-Receptor Antagonists	Macrolides	1103	1521317	0.07%	521	273975	0.19%
03020000	04010201	Corticosteroids (For Respiratory Conditions)	Benzodiazepines	645	1521317	0.04%	521	273975	0.19%
03010101	12010151	Selective Beta 2 Agonists	Anti-Inflammatory Preparations	923	1521317	0.06%	520	273975	0.19%
01060400	06010202	Osmotic Laxatives	Biguanides (Metformin)	905	1521317	0.06%	520	273975	0.19%
02040000	06040103	Beta-Adrenoceptor Blockers	Progestogen Products Doubling (In House Use)	1135	1521317	0.07%	519	273975	0.19%
02050200	09010101	Centrally Acting Antihypertensive Products	Oral Iron	977	1521317	0.06%	517	273975	0.19%
03020000	04105100	Corticosteroids (For Respiratory Conditions)	Substance Dependence - Nicotine Dependence	939	1521317	0.06%	516	273975	0.19%
02090000	05011300	Antiplatelet Products	Urinary-Tract Infections	1230	1521317	0.08%	515	273975	0.19%
06020100	09060400	Thyroid Hormones	Vitamin D	801	1521317	0.05%	514	273975	0.19%
03030200	03040101	Leukotriene Receptor Antagonists	Non-Sedating Antihistamines	669	1521317	0.04%	513	273975	0.19%
05010500	05011100	Macrolides	Metronidazole And Tinidazole	1585	1521317	0.10%	511	273975	0.19%
01010201	02080100	Compound Alginate Preparations	Parenteral Anticoagulants	1114	1521317	0.07%	510	273975	0.19%
04030300	06040102	Selective Serotonin Re-Uptake Inhibitors (SSRI)	Progestogens And Progesterone Receptor Modulators	732	1521317	0.05%	510	273975	0.19%
04030300	09060700	Selective Serotonin Re-Uptake Inhibitors (SSRI)	Multivitamin And Multimineral Preparations	702	1521317	0.05%	509	273975	0.19%
05010500	05010800	Macrolides	Sulphonamides And Trimethoprim	1308	1521317	0.09%	508	273975	0.19%
01030500	01060100	Proton Pump Inhibitors	Bulk-Forming Laxatives	963	1521317	0.06%	508	273975	0.19%
03040101	04030400	Non-Sedating Antihistamines	Other Antidepressants	574	1521317	0.04%	508	273975	0.19%
01070000	01070200	Local Products For Anal Or Rectal Problems	Compound Haemorrhoid Products With Corticosteroids	1727	1521317	0.11%	507	273975	0.19%
01010101	03010101	Aluminium- And Magnesium- Containing Antacids	Selective Beta 2 Agonists	1008	1521317	0.07%	507	273975	0.19%
04030300	05020100	Selective Serotonin Re-Uptake Inhibitors (SSRI)	Triazole Antifungals	749	1521317	0.05%	507	273975	0.19%
04010100	04065400	Hypnotics	Products Used Against Nausea And Vertigo - Antihistamines	1152	1521317	0.08%	505	273975	0.18%
01030500	04020102	Proton Pump Inhibitors	Second-Generation Antipsychotic Drugs	525	1521317	0.03%	505	273975	0.18%
09010101	13100200	Oral Iron	Antifungal Preparations (Topical	1880	1521317	0.12%	504	273975	0.18%
05010103	09060700	Broad-Spectrum Penicillins	Multivitamin And Multimineral Preparations	1413	1521317	0.09%	504	273975	0.18%
04065500	04070200	Products Used Against Nausea And Vertigo - Domperidone & Metoclopramide	Opioid Analgesics	850	1521317	0.06%	504	273975	0.18%
01050200	04070200	Corticosteroids In Chronic Bowel Problems	Opioid Analgesics	634	1521317	0.04%	504	273975	0.18%
01010201	03090200	Compound Alginate Preparations	Demulcent And Expectorant Cough Preparations	1804	1521317	0.12%	501	273975	0.18%
09060400	13040000	Vitamin D	Topical Corticosteroids	1124	1521317	0.07%	501	273975	0.18%
05010300	09010101	Tetracyclines	Oral Iron	1525	1521317	0.10%	500	273975	0.18%
01010201	13090000	Compound Alginate Preparations	Shampoos And Other Preparations For Scalp And Hair Conditions	1193	1521317	0.08%	500	273975	0.18%
01010000	01010201	Indigestion And GORD (Gastro-Oesophageal Reflux Disease)	Compound Alginate Preparations	1855	1521317	0.12%	498	273975	0.18%
01060400	01070100	Osmotic Laxatives	Soothing Haemorrhoid Products	1706	1521317	0.11%	498	273975	0.18%
01030100	03040102	H2-Receptor Antagonists	Sedating Antihistamines	1145	1521317	0.08%	498	273975	0.18%
03040101	04020101	Non-Sedating Antihistamines	First-Generation Antipsychotic Drugs	966	1521317	0.06%	497	273975	0.18%
02090000	03040101	Antiplatelet Products	Non-Sedating Antihistamines	881	1521317	0.06%	497	273975	0.18%
02040000	10010100	Beta-Adrenoceptor Blockers	Non-Steroidal Anti-Inflammatory Drugs	823	1521317	0.05%	496	273975	0.18%
04030300	04065600	Selective Serotonin Re-Uptake Inhibitors (SSRI)	Products Used Against Nausea And Vertigo - 5 HT3 Antagonists	697	1521317	0.05%	496	273975	0.18%
05010102	13020100	Penicillinase-Resistant Penicillins	Emollients	1308	1521317	0.09%	495	273975	0.18%
04010100	13020102	Hypnotics	Emollient Skin Preparations	893	1521317	0.06%	495	273975	0.18%
05010500	06020100	Macrolides	Thyroid Hormones	741	1521317	0.05%	495	273975	0.18%
02040000	02050501	Beta-Adrenoceptor Blockers	Angiotensin-Converting Enzyme Inhibitors (ACE Inhibitors)	684	1521317	0.04%	494	273975	0.18%
05010101	05010102	Benzylpenicillin And Phenoxymethylpenicillin	Penicillinase-Resistant Penicillins	1605	1521317	0.11%	493	273975	0.18%
03040101	05011300	Non-Sedating Antihistamines	Urinary-Tract Infections	969	1521317	0.06%	493	273975	0.18%
02040000	02060200	Beta-Adrenoceptor Blockers	Calcium-Channel Blockers	875	1521317	0.06%	493	273975	0.18%
04065600	09010101	Products Used Against Nausea And Vertigo - 5 HT3 Antagonists	Oral Iron	1399	1521317	0.09%	492	273975	0.18%
04030300	13060102	Selective Serotonin Re-Uptake Inhibitors (SSRI)	Topical Antibacterials For Acne	782	1521317	0.05%	492	273975	0.18%
05010201	11030100	Cephalosporins	Antibacterials (In Eye Preparation)	1746	1521317	0.11%	491	273975	0.18%
12010151	13040000	Anti-Inflammatory Preparations	Topical Corticosteroids	1236	1521317	0.08%	490	273975	0.18%
05010103	13060102	Broad-Spectrum Penicillins	Topical Antibacterials For Acne	1652	1521317	0.11%	488	273975	0.18%
04020101	13020102	First-Generation Antipsychotic Drugs	Emollient Skin Preparations	1171	1521317	0.08%	487	273975	0.18%
03030200	05010103	Leukotriene Receptor Antagonists	Broad-Spectrum Penicillins	677	1521317	0.04%	487	273975	0.18%
02040000	04070200	Beta-Adrenoceptor Blockers	Opioid Analgesics	634	1521317	0.04%	487	273975	0.18%
05010103	13100200	Broad-Spectrum Penicillins	Antifungal Preparations (Topical	1496	1521317	0.10%	486	273975	0.18%
03020000	04065500	Corticosteroids (For Respiratory Conditions)	Products Used Against Nausea And Vertigo - Domperidone & Metoclopramide	820	1521317	0.05%	486	273975	0.18%
01030100	06020100	H2-Receptor Antagonists	Thyroid Hormones	695	1521317	0.05%	486	273975	0.18%
07020250	13090000	Preparations For Vaginal And Vulval Candidiasis	Shampoos And Other Preparations For Scalp And Hair Conditions	1213	1521317	0.08%	485	273975	0.18%
01030100	01050200	H2-Receptor Antagonists	Corticosteroids In Chronic Bowel Problems	781	1521317	0.05%	485	273975	0.18%
05010102	13020101	Penicillinase-Resistant Penicillins	Emollient Bath Additives And Shower Preparations	1073	1521317	0.07%	484	273975	0.18%
01030500	05010101	Proton Pump Inhibitors	Benzylpenicillin And Phenoxymethylpenicillin	1060	1521317	0.07%	484	273975	0.18%
05010201	06010101	Cephalosporins	Short-Acting Insulins	754	1521317	0.05%	484	273975	0.18%
01060400	04065600	Osmotic Laxatives	Products Used Against Nausea And Vertigo - 5 HT3 Antagonists	1213	1521317	0.08%	483	273975	0.18%
01050200	03040102	Corticosteroids In Chronic Bowel Problems	Sedating Antihistamines	863	1521317	0.06%	483	273975	0.18%
03040102	13030000	Sedating Antihistamines	Topical Local Anaesthetics And Antipruritics	1605	1521317	0.11%	482	273975	0.18%
04030100	05010500	Tricyclic And Related Antidepressants	Macrolides	659	1521317	0.04%	482	273975	0.18%
09010101	14040200	Oral Iron	Vaccines And Antisera - Influenza Vaccines	1914	1521317	0.13%	480	273975	0.18%
01010201	13060102	Compound Alginate Preparations	Topical Antibacterials For Acne	1694	1521317	0.11%	480	273975	0.18%
03010000	05010201	Bronchodilators	Cephalosporins	1002	1521317	0.07%	480	273975	0.18%
01040200	05010500	Antimotility Products	Macrolides	959	1521317	0.06%	480	273975	0.18%
04065500	12020101	Products Used Against Nausea And Vertigo - Domperidone & Metoclopramide	Corticosteroids Used In Nasal Allergy	951	1521317	0.06%	479	273975	0.17%
01050100	01050200	Aminosalicylates	Corticosteroids In Chronic Bowel Problems	858	1521317	0.06%	479	273975	0.17%
01030100	01070200	H2-Receptor Antagonists	Compound Haemorrhoid Products With Corticosteroids	1183	1521317	0.08%	478	273975	0.17%
01020200	13040000	Other Antispasmodics	Topical Corticosteroids	912	1521317	0.06%	478	273975	0.17%
05010201	06010102	Cephalosporins	Intermediate- And Long-Acting Insulins	716	1521317	0.05%	478	273975	0.17%
03040102	05010102	Sedating Antihistamines	Penicillinase-Resistant Penicillins	1339	1521317	0.09%	477	273975	0.17%
01040200	04010100	Antimotility Products	Hypnotics	732	1521317	0.05%	477	273975	0.17%
13020102	71580200	Emollient Skin Preparations	Emollient Ointment	1127	1521317	0.07%	476	273975	0.17%
01070200	03040101	Compound Haemorrhoid Products With Corticosteroids	Non-Sedating Antihistamines	960	1521317	0.06%	476	273975	0.17%
01010201	04020100	Compound Alginate Preparations	Antipsychotic Products	1613	1521317	0.11%	475	273975	0.17%
05010102	05010500	Penicillinase-Resistant Penicillins	Macrolides	1354	1521317	0.09%	475	273975	0.17%
13040000	13100200	Topical Corticosteroids	Antifungal Preparations (Topical	1499	1521317	0.10%	474	273975	0.17%
04010201	05010500	Benzodiazepines	Macrolides	662	1521317	0.04%	474	273975	0.17%
01030100	10010100	H2-Receptor Antagonists	Non-Steroidal Anti-Inflammatory Drugs	1002	1521317	0.07%	473	273975	0.17%
03040102	04020101	Sedating Antihistamines	First-Generation Antipsychotic Drugs	1205	1521317	0.08%	472	273975	0.17%
01060200	05010201	Stimulant Laxatives	Cephalosporins	1090	1521317	0.07%	472	273975	0.17%
01010201	04020102	Compound Alginate Preparations	Second-Generation Antipsychotic Drugs	529	1521317	0.03%	472	273975	0.17%
02080100	07020250	Parenteral Anticoagulants	Preparations For Vaginal And Vulval Candidiasis	1031	1521317	0.07%	471	273975	0.17%
01010101	04030300	Aluminium- And Magnesium- Containing Antacids	Selective Serotonin Re-Uptake Inhibitors (SSRI)	702	1521317	0.05%	470	273975	0.17%
01040200	04010201	Antimotility Products	Benzodiazepines	666	1521317	0.04%	470	273975	0.17%
13040000	13050200	Topical Corticosteroids	Preparations For Psoriasis	970	1521317	0.06%	469	273975	0.17%
01030500	04105100	Proton Pump Inhibitors	Substance Dependence - Nicotine Dependence	811	1521317	0.05%	469	273975	0.17%
01050200	02090000	Corticosteroids In Chronic Bowel Problems	Antiplatelet Products	734	1521317	0.05%	468	273975	0.17%
04070100	13060102	Non-Opioid And Compound Analgesics	Topical Antibacterials For Acne	1272	1521317	0.08%	467	273975	0.17%
11030100	12020101	Antibacterials (In Eye Preparation)	Corticosteroids Used In Nasal Allergy	1160	1521317	0.08%	467	273975	0.17%
13020102	13100101	Emollient Skin Preparations	Antibacterial Preparations Only Used Topically	1253	1521317	0.08%	466	273975	0.17%
05010800	12020101	Sulphonamides And Trimethoprim	Corticosteroids Used In Nasal Allergy	1050	1521317	0.07%	465	273975	0.17%
01040200	13020102	Antimotility Products	Emollient Skin Preparations	912	1521317	0.06%	465	273975	0.17%
04080100	05010103	Control Of Epilepsy	Broad-Spectrum Penicillins	746	1521317	0.05%	465	273975	0.17%
04070200	04070300	Opioid Analgesics	Neuropathic Pain	581	1521317	0.04%	465	273975	0.17%
01030500	06010101	Proton Pump Inhibitors	Short-Acting Insulins	575	1521317	0.04%	465	273975	0.17%
04065400	04070200	Products Used Against Nausea And Vertigo - Antihistamines	Opioid Analgesics	747	1521317	0.05%	464	273975	0.17%
01030100	02040000	H2-Receptor Antagonists	Beta-Adrenoceptor Blockers	735	1521317	0.05%	462	273975	0.17%
05011300	06020100	Urinary-Tract Infections	Thyroid Hormones	699	1521317	0.05%	461	273975	0.17%
01030500	09010200	Proton Pump Inhibitors	Drugs Used In Megaloblastic Anaemias	745	1521317	0.05%	460	273975	0.17%
04020101	05010500	First-Generation Antipsychotic Drugs	Macrolides	1134	1521317	0.07%	459	273975	0.17%
01060400	09060400	Osmotic Laxatives	Vitamin D	1126	1521317	0.07%	459	273975	0.17%
04020101	04065600	First-Generation Antipsychotic Drugs	Products Used Against Nausea And Vertigo - 5 HT3 Antagonists	1233	1521317	0.08%	457	273975	0.17%
03040101	05010800	Non-Sedating Antihistamines	Sulphonamides And Trimethoprim	942	1521317	0.06%	457	273975	0.17%
01030500	11040200	Proton Pump Inhibitors	Other Anti-Inflammatory Eye Preparations (For The Eye)	748	1521317	0.05%	457	273975	0.17%
03010101	13040200	Selective Beta 2 Agonists	Mild Topical Corticosteroids	874	1521317	0.06%	456	273975	0.17%
04030300	13020103	Selective Serotonin Re-Uptake Inhibitors (SSRI)	Antimicrobial Emollients	614	1521317	0.04%	455	273975	0.17%
04065600	05010103	Products Used Against Nausea And Vertigo - 5 HT3 Antagonists	Broad-Spectrum Penicillins	1056	1521317	0.07%	453	273975	0.17%
04020101	10010100	First-Generation Antipsychotic Drugs	Non-Steroidal Anti-Inflammatory Drugs	1052	1521317	0.07%	453	273975	0.17%
04070200	13020102	Opioid Analgesics	Emollient Skin Preparations	738	1521317	0.05%	453	273975	0.17%
01030100	04030100	H2-Receptor Antagonists	Tricyclic And Related Antidepressants	657	1521317	0.04%	453	273975	0.17%
04065400	13020102	Products Used Against Nausea And Vertigo - Antihistamines	Emollient Skin Preparations	1144	1521317	0.08%	452	273975	0.16%
01050200	04060000	Corticosteroids In Chronic Bowel Problems	Products Used Against Nausea And Vertigo	737	1521317	0.05%	452	273975	0.16%
04060000	06040103	Products Used Against Nausea And Vertigo	Progestogen Products Doubling (In House Use)	1272	1521317	0.08%	451	273975	0.16%
05010201	13020101	Cephalosporins	Emollient Bath Additives And Shower Preparations	1075	1521317	0.07%	451	273975	0.16%
03010101	12030100	Selective Beta 2 Agonists	Drugs For Oral Ulceration And Inflammation	873	1521317	0.06%	451	273975	0.16%
01070200	06020100	Compound Haemorrhoid Products With Corticosteroids	Thyroid Hormones	747	1521317	0.05%	451	273975	0.16%
01010201	13100200	Compound Alginate Preparations	Antifungal Preparations (Topical	1475	1521317	0.10%	450	273975	0.16%
03010101	71580200	Selective Beta 2 Agonists	Emollient Ointment	664	1521317	0.04%	450	273975	0.16%
01010201	09020102	Compound Alginate Preparations	Oral Sodium And Water	1701	1521317	0.11%	449	273975	0.16%
04070100	14040800	Non-Opioid And Compound Analgesics	Vaccines And Antisera - Diphtheria Vaccines	1338	1521317	0.09%	449	273975	0.16%
04030100	06020100	Tricyclic And Related Antidepressants	Thyroid Hormones	499	1521317	0.03%	449	273975	0.16%
03090100	05010103	Cough Suppressants	Broad-Spectrum Penicillins	1662	1521317	0.11%	447	273975	0.16%
04030300	12030100	Selective Serotonin Re-Uptake Inhibitors (SSRI)	Drugs For Oral Ulceration And Inflammation	679	1521317	0.04%	447	273975	0.16%
01040200	04065400	Antimotility Products	Products Used Against Nausea And Vertigo - Antihistamines	1003	1521317	0.07%	446	273975	0.16%
04070200	05010102	Opioid Analgesics	Penicillinase-Resistant Penicillins	783	1521317	0.05%	446	273975	0.16%
01060100	03020000	Bulk-Forming Laxatives	Corticosteroids (For Respiratory Conditions)	763	1521317	0.05%	446	273975	0.16%
09010200	13040000	Drugs Used In Megaloblastic Anaemias	Topical Corticosteroids	914	1521317	0.06%	445	273975	0.16%
05010300	13040000	Tetracyclines	Topical Corticosteroids	872	1521317	0.06%	445	273975	0.16%
03040102	04010100	Sedating Antihistamines	Hypnotics	801	1521317	0.05%	445	273975	0.16%
01060400	11030100	Osmotic Laxatives	Antibacterials (In Eye Preparation)	1391	1521317	0.09%	444	273975	0.16%
01040200	04020101	Antimotility Products	First-Generation Antipsychotic Drugs	935	1521317	0.06%	444	273975	0.16%
01040200	03040101	Antimotility Products	Non-Sedating Antihistamines	716	1521317	0.05%	444	273975	0.16%
02050200	02090000	Centrally Acting Antihypertensive Products	Antiplatelet Products	791	1521317	0.05%	443	273975	0.16%
03010000	03040101	Bronchodilators	Non-Sedating Antihistamines	687	1521317	0.05%	443	273975	0.16%
09010101	09020102	Oral Iron	Oral Sodium And Water	1963	1521317	0.13%	442	273975	0.16%
04020100	04070100	Antipsychotic Products	Non-Opioid And Compound Analgesics	1304	1521317	0.09%	441	273975	0.16%
02080100	03010101	Parenteral Anticoagulants	Selective Beta 2 Agonists	666	1521317	0.04%	441	273975	0.16%
01070000	05010201	Local Products For Anal Or Rectal Problems	Cephalosporins	1400	1521317	0.09%	440	273975	0.16%
05011100	10010100	Metronidazole And Tinidazole	Non-Steroidal Anti-Inflammatory Drugs	1231	1521317	0.08%	440	273975	0.16%
05010102	06020100	Penicillinase-Resistant Penicillins	Thyroid Hormones	690	1521317	0.05%	439	273975	0.16%
04030000	04030300	Antidepressants	Selective Serotonin Re-Uptake Inhibitors (SSRI)	491	1521317	0.03%	439	273975	0.16%
04030100	13020102	Tricyclic And Related Antidepressants	Emollient Skin Preparations	606	1521317	0.04%	438	273975	0.16%
04030300	04070300	Selective Serotonin Re-Uptake Inhibitors (SSRI)	Neuropathic Pain	499	1521317	0.03%	438	273975	0.16%
05010103	14040200	Broad-Spectrum Penicillins	Vaccines And Antisera - Influenza Vaccines	1413	1521317	0.09%	437	273975	0.16%
01070100	05010103	Soothing Haemorrhoid Products	Broad-Spectrum Penicillins	1379	1521317	0.09%	437	273975	0.16%
03040101	04010201	Non-Sedating Antihistamines	Benzodiazepines	562	1521317	0.04%	437	273975	0.16%
01030500	06010102	Proton Pump Inhibitors	Intermediate- And Long-Acting Insulins	534	1521317	0.04%	436	273975	0.16%
13040000	14040800	Topical Corticosteroids	Vaccines And Antisera - Diphtheria Vaccines	1304	1521317	0.09%	434	273975	0.16%
04065400	04065600	Products Used Against Nausea And Vertigo - Antihistamines	Products Used Against Nausea And Vertigo - 5 HT3 Antagonists	1146	1521317	0.08%	433	273975	0.16%
02090000	04070200	Antiplatelet Products	Opioid Analgesics	628	1521317	0.04%	433	273975	0.16%
04020100	09010101	Antipsychotic Products	Oral Iron	1787	1521317	0.12%	432	273975	0.16%
01010101	01060400	Aluminium- And Magnesium- Containing Antacids	Osmotic Laxatives	1423	1521317	0.09%	432	273975	0.16%
01030100	04010100	H2-Receptor Antagonists	Hypnotics	783	1521317	0.05%	432	273975	0.16%
09010101	71580200	Oral Iron	Emollient Ointment	1141	1521317	0.08%	431	273975	0.16%
07020250	07020251	Preparations For Vaginal And Vulval Candidiasis	Preparations For Other Vaginal Infections	1519	1521317	0.10%	430	273975	0.16%
05010101	13020102	Benzylpenicillin And Phenoxymethylpenicillin	Emollient Skin Preparations	1230	1521317	0.08%	430	273975	0.16%
04070100	13100200	Non-Opioid And Compound Analgesics	Antifungal Preparations (Topical	1088	1521317	0.07%	430	273975	0.16%
05020100	13040000	Triazole Antifungals	Topical Corticosteroids	1064	1521317	0.07%	430	273975	0.16%
06040102	13040000	Progestogens And Progesterone Receptor Modulators	Topical Corticosteroids	1001	1521317	0.07%	430	273975	0.16%
02090000	05010500	Antiplatelet Products	Macrolides	841	1521317	0.06%	430	273975	0.16%
01060400	09010200	Osmotic Laxatives	Drugs Used In Megaloblastic Anaemias	958	1521317	0.06%	429	273975	0.16%
01030100	04030400	H2-Receptor Antagonists	Other Antidepressants	484	1521317	0.03%	429	273975	0.16%
02090000	06040102	Antiplatelet Products	Progestogens And Progesterone Receptor Modulators	1187	1521317	0.08%	428	273975	0.16%
05010103	06010400	Broad-Spectrum Penicillins	Treatment Of Hypoglycaemia	603	1521317	0.04%	427	273975	0.16%
05020100	09010101	Triazole Antifungals	Oral Iron	1398	1521317	0.09%	426	273975	0.16%
05010800	13020102	Sulphonamides And Trimethoprim	Emollient Skin Preparations	1071	1521317	0.07%	426	273975	0.16%
03040102	10010100	Sedating Antihistamines	Non-Steroidal Anti-Inflammatory Drugs	957	1521317	0.06%	426	273975	0.16%
01060200	04060000	Stimulant Laxatives	Products Used Against Nausea And Vertigo	874	1521317	0.06%	426	273975	0.16%
05010101	10010100	Benzylpenicillin And Phenoxymethylpenicillin	Non-Steroidal Anti-Inflammatory Drugs	1358	1521317	0.09%	425	273975	0.16%
01070200	10010100	Compound Haemorrhoid Products With Corticosteroids	Non-Steroidal Anti-Inflammatory Drugs	1131	1521317	0.07%	425	273975	0.16%
02050200	05010103	Centrally Acting Antihypertensive Products	Broad-Spectrum Penicillins	750	1521317	0.05%	424	273975	0.15%
04065400	05010500	Products Used Against Nausea And Vertigo - Antihistamines	Macrolides	1030	1521317	0.07%	422	273975	0.15%
01040200	04065500	Antimotility Products	Products Used Against Nausea And Vertigo - Domperidone & Metoclopramide	944	1521317	0.06%	422	273975	0.15%
03010101	13030000	Selective Beta 2 Agonists	Topical Local Anaesthetics And Antipruritics	830	1521317	0.05%	422	273975	0.15%
02040000	02050200	Beta-Adrenoceptor Blockers	Centrally Acting Antihypertensive Products	801	1521317	0.05%	422	273975	0.15%
03010101	05020100	Selective Beta 2 Agonists	Triazole Antifungals	674	1521317	0.04%	422	273975	0.15%
01060400	06010101	Osmotic Laxatives	Short-Acting Insulins	602	1521317	0.04%	421	273975	0.15%
03010101	13100300	Selective Beta 2 Agonists	Antiviral Preparations (Topical	714	1521317	0.05%	419	273975	0.15%
02040000	04020101	Beta-Adrenoceptor Blockers	First-Generation Antipsychotic Drugs	646	1521317	0.04%	419	273975	0.15%
02090000	04030100	Antiplatelet Products	Tricyclic And Related Antidepressants	575	1521317	0.04%	419	273975	0.15%
04030300	13100300	Selective Serotonin Re-Uptake Inhibitors (SSRI)	Antiviral Preparations (Topical	597	1521317	0.04%	417	273975	0.15%
03040101	06010202	Non-Sedating Antihistamines	Biguanides (Metformin)	535	1521317	0.04%	417	273975	0.15%
01010000	09010101	Indigestion And GORD (Gastro-Oesophageal Reflux Disease)	Oral Iron	1509	1521317	0.10%	416	273975	0.15%
05010103	13100400	Broad-Spectrum Penicillins	Parasiticidal Preparations (Topical)	1282	1521317	0.08%	416	273975	0.15%
01070200	05010500	Compound Haemorrhoid Products With Corticosteroids	Macrolides	1181	1521317	0.08%	415	273975	0.15%
01070100	04070100	Soothing Haemorrhoid Products	Non-Opioid And Compound Analgesics	1086	1521317	0.07%	415	273975	0.15%
01030500	05011100	Proton Pump Inhibitors	Metronidazole And Tinidazole	877	1521317	0.06%	415	273975	0.15%
01050200	03010000	Corticosteroids In Chronic Bowel Problems	Bronchodilators	771	1521317	0.05%	415	273975	0.15%
09010101	13100400	Oral Iron	Parasiticidal Preparations (Topical)	1714	1521317	0.11%	413	273975	0.15%
04065500	05011300	Products Used Against Nausea And Vertigo - Domperidone & Metoclopramide	Urinary-Tract Infections	1004	1521317	0.07%	413	273975	0.15%
03020000	11030100	Corticosteroids (For Respiratory Conditions)	Antibacterials (In Eye Preparation)	876	1521317	0.06%	413	273975	0.15%
02090000	10010100	Antiplatelet Products	Non-Steroidal Anti-Inflammatory Drugs	721	1521317	0.05%	413	273975	0.15%
05010500	13100101	Macrolides	Antibacterial Preparations Only Used Topically	1069	1521317	0.07%	412	273975	0.15%
01020200	05010201	Other Antispasmodics	Cephalosporins	894	1521317	0.06%	411	273975	0.15%
03010101	14040200	Selective Beta 2 Agonists	Vaccines And Antisera - Influenza Vaccines	854	1521317	0.06%	411	273975	0.15%
04030100	04065500	Tricyclic And Related Antidepressants	Products Used Against Nausea And Vertigo - Domperidone & Metoclopramide	597	1521317	0.04%	411	273975	0.15%
03040102	04065400	Sedating Antihistamines	Products Used Against Nausea And Vertigo - Antihistamines	1050	1521317	0.07%	410	273975	0.15%
04105100	13020102	Substance Dependence - Nicotine Dependence	Emollient Skin Preparations	1008	1521317	0.07%	410	273975	0.15%
01040200	05011300	Antimotility Products	Urinary-Tract Infections	921	1521317	0.06%	410	273975	0.15%
04030100	05011300	Tricyclic And Related Antidepressants	Urinary-Tract Infections	595	1521317	0.04%	410	273975	0.15%
04030100	04070401	Tricyclic And Related Antidepressants	Acute Migraine	594	1521317	0.04%	410	273975	0.15%
04070100	04070402	Non-Opioid And Compound Analgesics	Prophylaxis Of Migraine	586	1521317	0.04%	409	273975	0.15%
01010201	09060700	Compound Alginate Preparations	Multivitamin And Multimineral Preparations	1158	1521317	0.08%	408	273975	0.15%
06010202	12020101	Biguanides (Metformin)	Corticosteroids Used In Nasal Allergy	615	1521317	0.04%	408	273975	0.15%
01060200	04070200	Stimulant Laxatives	Opioid Analgesics	605	1521317	0.04%	408	273975	0.15%
01050200	03030200	Corticosteroids In Chronic Bowel Problems	Leukotriene Receptor Antagonists	558	1521317	0.04%	408	273975	0.15%
04065500	10010100	Products Used Against Nausea And Vertigo - Domperidone & Metoclopramide	Non-Steroidal Anti-Inflammatory Drugs	919	1521317	0.06%	407	273975	0.15%
03040102	06020100	Sedating Antihistamines	Thyroid Hormones	605	1521317	0.04%	407	273975	0.15%
05010103	12010100	Broad-Spectrum Penicillins	Drugs Acting On The Ear - Otitis Externa	1376	1521317	0.09%	406	273975	0.15%
01070200	04020101	Compound Haemorrhoid Products With Corticosteroids	First-Generation Antipsychotic Drugs	1014	1521317	0.07%	406	273975	0.15%
04070200	05010800	Opioid Analgesics	Sulphonamides And Trimethoprim	718	1521317	0.05%	405	273975	0.15%
01030100	01040200	H2-Receptor Antagonists	Antimotility Products	832	1521317	0.05%	404	273975	0.15%
05010201	06010202	Cephalosporins	Biguanides (Metformin)	726	1521317	0.05%	404	273975	0.15%
05010101	06040103	Benzylpenicillin And Phenoxymethylpenicillin	Progestogen Products Doubling (In House Use)	2042	1521317	0.13%	403	273975	0.15%
01010101	13040000	Aluminium- And Magnesium- Containing Antacids	Topical Corticosteroids	1231	1521317	0.08%	403	273975	0.15%
01050200	05010102	Corticosteroids In Chronic Bowel Problems	Penicillinase-Resistant Penicillins	653	1521317	0.04%	403	273975	0.15%
04060000	05010101	Products Used Against Nausea And Vertigo	Benzylpenicillin And Phenoxymethylpenicillin	1144	1521317	0.08%	402	273975	0.15%
05010103	12020300	Broad-Spectrum Penicillins	Nasal Preparations For Infection	1096	1521317	0.07%	401	273975	0.15%
01040200	05010102	Antimotility Products	Penicillinase-Resistant Penicillins	865	1521317	0.06%	401	273975	0.15%
04020101	06020100	First-Generation Antipsychotic Drugs	Thyroid Hormones	594	1521317	0.04%	401	273975	0.15%
13020102	13090000	Emollient Skin Preparations	Shampoos And Other Preparations For Scalp And Hair Conditions	865	1521317	0.06%	400	273975	0.15%
03040101	04065400	Non-Sedating Antihistamines	Products Used Against Nausea And Vertigo - Antihistamines	837	1521317	0.06%	400	273975	0.15%
01060100	13020102	Bulk-Forming Laxatives	Emollient Skin Preparations	1003	1521317	0.07%	399	273975	0.15%
11040200	13020100	Other Anti-Inflammatory Eye Preparations (For The Eye)	Emollients	901	1521317	0.06%	399	273975	0.15%
04010201	12020101	Benzodiazepines	Corticosteroids Used In Nasal Allergy	564	1521317	0.04%	399	273975	0.15%
04020100	05010103	Antipsychotic Products	Broad-Spectrum Penicillins	1428	1521317	0.09%	398	273975	0.15%
02090000	04020101	Antiplatelet Products	First-Generation Antipsychotic Drugs	962	1521317	0.06%	398	273975	0.15%
01030500	13020100	Proton Pump Inhibitors	Emollients	744	1521317	0.05%	398	273975	0.15%
01010201	05010300	Compound Alginate Preparations	Tetracyclines	991	1521317	0.07%	397	273975	0.14%
12020101	13100101	Corticosteroids Used In Nasal Allergy	Antibacterial Preparations Only Used Topically	845	1521317	0.06%	396	273975	0.14%
04010100	05010102	Hypnotics	Penicillinase-Resistant Penicillins	712	1521317	0.05%	396	273975	0.14%
04030300	13030000	Selective Serotonin Re-Uptake Inhibitors (SSRI)	Topical Local Anaesthetics And Antipruritics	568	1521317	0.04%	396	273975	0.14%
02080100	04030300	Parenteral Anticoagulants	Selective Serotonin Re-Uptake Inhibitors (SSRI)	520	1521317	0.03%	396	273975	0.14%
04030000	04070200	Antidepressants	Opioid Analgesics	467	1521317	0.03%	396	273975	0.14%
11030100	13020102	Antibacterials (In Eye Preparation)	Emollient Skin Preparations	1041	1521317	0.07%	395	273975	0.14%
04070100	11080100	Non-Opioid And Compound Analgesics	Tear Deficiency	782	1521317	0.05%	395	273975	0.14%
02040000	04070401	Beta-Adrenoceptor Blockers	Acute Migraine	619	1521317	0.04%	395	273975	0.14%
04030100	04065400	Tricyclic And Related Antidepressants	Products Used Against Nausea And Vertigo - Antihistamines	599	1521317	0.04%	395	273975	0.14%
06010400	07020250	Treatment Of Hypoglycaemia	Preparations For Vaginal And Vulval Candidiasis	569	1521317	0.04%	395	273975	0.14%
03010101	03010200	Selective Beta 2 Agonists	Antimuscarinic Bronchodilators	512	1521317	0.03%	395	273975	0.14%
04030400	05011300	Other Antidepressants	Urinary-Tract Infections	484	1521317	0.03%	395	273975	0.14%
01010201	05020100	Compound Alginate Preparations	Triazole Antifungals	1077	1521317	0.07%	394	273975	0.14%
02090000	05010102	Antiplatelet Products	Penicillinase-Resistant Penicillins	931	1521317	0.06%	394	273975	0.14%
01030100	04010201	H2-Receptor Antagonists	Benzodiazepines	571	1521317	0.04%	394	273975	0.14%
04020101	05010800	First-Generation Antipsychotic Drugs	Sulphonamides And Trimethoprim	1032	1521317	0.07%	393	273975	0.14%
05010800	06020100	Sulphonamides And Trimethoprim	Thyroid Hormones	573	1521317	0.04%	393	273975	0.14%
07020250	14040200	Preparations For Vaginal And Vulval Candidiasis	Vaccines And Antisera - Influenza Vaccines	1320	1521317	0.09%	392	273975	0.14%
05011300	06040103	Urinary-Tract Infections	Progestogen Products Doubling (In House Use)	1290	1521317	0.08%	392	273975	0.14%
04070200	05011300	Opioid Analgesics	Urinary-Tract Infections	670	1521317	0.04%	392	273975	0.14%
04010100	04105100	Hypnotics	Substance Dependence - Nicotine Dependence	603	1521317	0.04%	392	273975	0.14%
03010101	13090000	Selective Beta 2 Agonists	Shampoos And Other Preparations For Scalp And Hair Conditions	580	1521317	0.04%	392	273975	0.14%
03010101	04080100	Selective Beta 2 Agonists	Control Of Epilepsy	448	1521317	0.03%	392	273975	0.14%
04030400	05010500	Other Antidepressants	Macrolides	464	1521317	0.03%	391	273975	0.14%
01070200	05010102	Compound Haemorrhoid Products With Corticosteroids	Penicillinase-Resistant Penicillins	1157	1521317	0.08%	390	273975	0.14%
10030250	13040000	Topical Nsaids And Counter Irritants	Topical Corticosteroids	960	1521317	0.06%	390	273975	0.14%
04070100	09020102	Non-Opioid And Compound Analgesics	Oral Sodium And Water	1250	1521317	0.08%	389	273975	0.14%
09010101	11080100	Oral Iron	Tear Deficiency	1016	1521317	0.07%	389	273975	0.14%
06020100	06040102	Thyroid Hormones	Progestogens And Progesterone Receptor Modulators	610	1521317	0.04%	389	273975	0.14%
02040000	06010202	Beta-Adrenoceptor Blockers	Biguanides (Metformin)	501	1521317	0.03%	389	273975	0.14%
04030300	13040200	Selective Serotonin Re-Uptake Inhibitors (SSRI)	Mild Topical Corticosteroids	588	1521317	0.04%	388	273975	0.14%
04030400	13020102	Other Antidepressants	Emollient Skin Preparations	468	1521317	0.03%	388	273975	0.14%
03090200	07020250	Demulcent And Expectorant Cough Preparations	Preparations For Vaginal And Vulval Candidiasis	1393	1521317	0.09%	387	273975	0.14%
03040101	13020103	Non-Sedating Antihistamines	Antimicrobial Emollients	756	1521317	0.05%	387	273975	0.14%
02040000	12020101	Beta-Adrenoceptor Blockers	Corticosteroids Used In Nasal Allergy	623	1521317	0.04%	387	273975	0.14%
01040200	06040103	Antimotility Products	Progestogen Products Doubling (In House Use)	914	1521317	0.06%	386	273975	0.14%
04070200	04105100	Opioid Analgesics	Substance Dependence - Nicotine Dependence	597	1521317	0.04%	386	273975	0.14%
01060400	06040102	Osmotic Laxatives	Progestogens And Progesterone Receptor Modulators	922	1521317	0.06%	385	273975	0.14%
01050200	09060400	Corticosteroids In Chronic Bowel Problems	Vitamin D	559	1521317	0.04%	385	273975	0.14%
04010201	13020102	Benzodiazepines	Emollient Skin Preparations	541	1521317	0.04%	385	273975	0.14%
05030201	07020250	Herpes Simplex And Varicella-Zoster Infection	Preparations For Vaginal And Vulval Candidiasis	1279	1521317	0.08%	384	273975	0.14%
04030400	05010800	Other Antidepressants	Sulphonamides And Trimethoprim	474	1521317	0.03%	384	273975	0.14%
05010103	09020102	Broad-Spectrum Penicillins	Oral Sodium And Water	1468	1521317	0.10%	383	273975	0.14%
01010201	14040200	Compound Alginate Preparations	Vaccines And Antisera - Influenza Vaccines	1408	1521317	0.09%	383	273975	0.14%
04010100	05010800	Hypnotics	Sulphonamides And Trimethoprim	673	1521317	0.04%	383	273975	0.14%
05010300	05011100	Tetracyclines	Metronidazole And Tinidazole	1273	1521317	0.08%	382	273975	0.14%
06010202	13020102	Biguanides (Metformin)	Emollient Skin Preparations	625	1521317	0.04%	382	273975	0.14%
01050200	10010100	Corticosteroids In Chronic Bowel Problems	Non-Steroidal Anti-Inflammatory Drugs	568	1521317	0.04%	382	273975	0.14%
03010101	11080100	Selective Beta 2 Agonists	Tear Deficiency	541	1521317	0.04%	381	273975	0.14%
04010100	06020100	Hypnotics	Thyroid Hormones	468	1521317	0.03%	381	273975	0.14%
05010101	05010500	Benzylpenicillin And Phenoxymethylpenicillin	Macrolides	1210	1521317	0.08%	380	273975	0.14%
01010201	04065600	Compound Alginate Preparations	Products Used Against Nausea And Vertigo - 5 HT3 Antagonists	939	1521317	0.06%	380	273975	0.14%
04105100	05010500	Substance Dependence - Nicotine Dependence	Macrolides	878	1521317	0.06%	380	273975	0.14%
04030400	04065400	Other Antidepressants	Products Used Against Nausea And Vertigo - Antihistamines	462	1521317	0.03%	380	273975	0.14%
05010101	06020100	Benzylpenicillin And Phenoxymethylpenicillin	Thyroid Hormones	605	1521317	0.04%	379	273975	0.14%
04070200	06020100	Opioid Analgesics	Thyroid Hormones	475	1521317	0.03%	379	273975	0.14%
04030400	12020101	Other Antidepressants	Corticosteroids Used In Nasal Allergy	435	1521317	0.03%	379	273975	0.14%
03040102	04070200	Sedating Antihistamines	Opioid Analgesics	656	1521317	0.04%	378	273975	0.14%
04030100	05010800	Tricyclic And Related Antidepressants	Sulphonamides And Trimethoprim	579	1521317	0.04%	378	273975	0.14%
01060400	06010102	Osmotic Laxatives	Intermediate- And Long-Acting Insulins	536	1521317	0.04%	378	273975	0.14%
09010101	12020300	Oral Iron	Nasal Preparations For Infection	1287	1521317	0.08%	377	273975	0.14%
03040101	04065500	Non-Sedating Antihistamines	Products Used Against Nausea And Vertigo - Domperidone & Metoclopramide	714	1521317	0.05%	377	273975	0.14%
04020000	04080100	Products Used In Psychoses And Related Disorders	Control Of Epilepsy	667	1521317	0.04%	377	273975	0.14%
03020000	06010202	Corticosteroids (For Respiratory Conditions)	Biguanides (Metformin)	492	1521317	0.03%	377	273975	0.14%
04030400	05010102	Other Antidepressants	Penicillinase-Resistant Penicillins	451	1521317	0.03%	377	273975	0.14%
04020000	04030300	Products Used In Psychoses And Related Disorders	Selective Serotonin Re-Uptake Inhibitors (SSRI)	415	1521317	0.03%	377	273975	0.14%
04030100	05010102	Tricyclic And Related Antidepressants	Penicillinase-Resistant Penicillins	573	1521317	0.04%	376	273975	0.14%
04065400	10010100	Products Used Against Nausea And Vertigo - Antihistamines	Non-Steroidal Anti-Inflammatory Drugs	877	1521317	0.06%	375	273975	0.14%
02050501	04070100	Angiotensin-Converting Enzyme Inhibitors (ACE Inhibitors)	Non-Opioid And Compound Analgesics	451	1521317	0.03%	375	273975	0.14%
07020250	09020102	Preparations For Vaginal And Vulval Candidiasis	Oral Sodium And Water	1328	1521317	0.09%	374	273975	0.14%
07020250	09060700	Preparations For Vaginal And Vulval Candidiasis	Multivitamin And Multimineral Preparations	1094	1521317	0.07%	374	273975	0.14%
04065500	05010500	Products Used Against Nausea And Vertigo - Domperidone & Metoclopramide	Macrolides	868	1521317	0.06%	374	273975	0.14%
13040000	13100300	Topical Corticosteroids	Antiviral Preparations (Topical	949	1521317	0.06%	373	273975	0.14%
01060100	04060000	Bulk-Forming Laxatives	Products Used Against Nausea And Vertigo	907	1521317	0.06%	373	273975	0.14%
01020000	04070100	Antispasmodics And Products Affecting Motility	Non-Opioid And Compound Analgesics	688	1521317	0.05%	373	273975	0.14%
01030100	05010102	H2-Receptor Antagonists	Penicillinase-Resistant Penicillins	908	1521317	0.06%	372	273975	0.14%
05010103	71580200	Broad-Spectrum Penicillins	Emollient Ointment	868	1521317	0.06%	372	273975	0.14%
04020000	09010101	Products Used In Psychoses And Related Disorders	Oral Iron	665	1521317	0.04%	372	273975	0.14%
07020250	71580200	Preparations For Vaginal And Vulval Candidiasis	Emollient Ointment	966	1521317	0.06%	371	273975	0.14%
01040200	02090000	Antimotility Products	Antiplatelet Products	649	1521317	0.04%	371	273975	0.14%
01060400	10030250	Osmotic Laxatives	Topical Nsaids And Counter Irritants	900	1521317	0.06%	370	273975	0.14%
03020000	13100101	Corticosteroids (For Respiratory Conditions)	Antibacterial Preparations Only Used Topically	690	1521317	0.05%	370	273975	0.14%
01060100	03040101	Bulk-Forming Laxatives	Non-Sedating Antihistamines	697	1521317	0.05%	369	273975	0.13%
01060400	03010000	Osmotic Laxatives	Bronchodilators	641	1521317	0.04%	369	273975	0.13%
06010400	09010101	Treatment Of Hypoglycaemia	Oral Iron	563	1521317	0.04%	369	273975	0.13%
04020101	06040103	First-Generation Antipsychotic Drugs	Progestogen Products Doubling (In House Use)	1106	1521317	0.07%	368	273975	0.13%
03010000	13020102	Bronchodilators	Emollient Skin Preparations	613	1521317	0.04%	368	273975	0.13%
02040000	03040101	Beta-Adrenoceptor Blockers	Non-Sedating Antihistamines	554	1521317	0.04%	368	273975	0.13%
01010101	05010201	Aluminium- And Magnesium- Containing Antacids	Cephalosporins	1284	1521317	0.08%	367	273975	0.13%
04070100	13100400	Non-Opioid And Compound Analgesics	Parasiticidal Preparations (Topical)	1103	1521317	0.07%	367	273975	0.13%
04065500	04065600	Products Used Against Nausea And Vertigo - Domperidone & Metoclopramide	Products Used Against Nausea And Vertigo - 5 HT3 Antagonists	1041	1521317	0.07%	367	273975	0.13%
02060200	04070100	Calcium-Channel Blockers	Non-Opioid And Compound Analgesics	500	1521317	0.03%	367	273975	0.13%
01030500	04065600	Proton Pump Inhibitors	Products Used Against Nausea And Vertigo - 5 HT3 Antagonists	720	1521317	0.05%	366	273975	0.13%
04080100	07020250	Control Of Epilepsy	Preparations For Vaginal And Vulval Candidiasis	587	1521317	0.04%	366	273975	0.13%
02050200	04070100	Centrally Acting Antihypertensive Products	Non-Opioid And Compound Analgesics	574	1521317	0.04%	366	273975	0.13%
01070200	06040103	Compound Haemorrhoid Products With Corticosteroids	Progestogen Products Doubling (In House Use)	1562	1521317	0.10%	365	273975	0.13%
03040101	05010101	Non-Sedating Antihistamines	Benzylpenicillin And Phenoxymethylpenicillin	938	1521317	0.06%	365	273975	0.13%
01070000	01070100	Local Products For Anal Or Rectal Problems	Soothing Haemorrhoid Products	1319	1521317	0.09%	364	273975	0.13%
05010201	13040200	Cephalosporins	Mild Topical Corticosteroids	1129	1521317	0.07%	364	273975	0.13%
05010103	12010300	Broad-Spectrum Penicillins	Drugs Acting On The Ear - Removal Of Ear Wax	1269	1521317	0.08%	363	273975	0.13%
04065600	04070100	Products Used Against Nausea And Vertigo - 5 HT3 Antagonists	Non-Opioid And Compound Analgesics	793	1521317	0.05%	363	273975	0.13%
01040200	01050200	Antimotility Products	Corticosteroids In Chronic Bowel Problems	540	1521317	0.04%	363	273975	0.13%
01020200	01060100	Other Antispasmodics	Bulk-Forming Laxatives	792	1521317	0.05%	362	273975	0.13%
13040000	13060102	Topical Corticosteroids	Topical Antibacterials For Acne	1048	1521317	0.07%	361	273975	0.13%
01030500	13100101	Proton Pump Inhibitors	Antibacterial Preparations Only Used Topically	635	1521317	0.04%	361	273975	0.13%
01060200	01070200	Stimulant Laxatives	Compound Haemorrhoid Products With Corticosteroids	1023	1521317	0.07%	360	273975	0.13%
04065600	07020250	Products Used Against Nausea And Vertigo - 5 HT3 Antagonists	Preparations For Vaginal And Vulval Candidiasis	887	1521317	0.06%	360	273975	0.13%
01010201	02050200	Compound Alginate Preparations	Centrally Acting Antihypertensive Products	711	1521317	0.05%	360	273975	0.13%
04030300	05030201	Selective Serotonin Re-Uptake Inhibitors (SSRI)	Herpes Simplex And Varicella-Zoster Infection	549	1521317	0.04%	360	273975	0.13%
04030400	06020100	Other Antidepressants	Thyroid Hormones	372	1521317	0.02%	360	273975	0.13%
06020100	11040200	Thyroid Hormones	Other Anti-Inflammatory Eye Preparations (For The Eye)	475	1521317	0.03%	359	273975	0.13%
01060400	04020102	Osmotic Laxatives	Second-Generation Antipsychotic Drugs	399	1521317	0.03%	359	273975	0.13%
01010201	11080100	Compound Alginate Preparations	Tear Deficiency	831	1521317	0.05%	358	273975	0.13%
01040200	04030400	Antimotility Products	Other Antidepressants	417	1521317	0.03%	358	273975	0.13%
05010300	06040103	Tetracyclines	Progestogen Products Doubling (In House Use)	1201	1521317	0.08%	357	273975	0.13%
13040000	13040100	Topical Corticosteroids	Topical Corticosteroids With Antimicrobials	1008	1521317	0.07%	357	273975	0.13%
01070200	03040102	Compound Haemorrhoid Products With Corticosteroids	Sedating Antihistamines	947	1521317	0.06%	357	273975	0.13%
01050200	06040103	Corticosteroids In Chronic Bowel Problems	Progestogen Products Doubling (In House Use)	724	1521317	0.05%	357	273975	0.13%
03040102	04030100	Sedating Antihistamines	Tricyclic And Related Antidepressants	499	1521317	0.03%	357	273975	0.13%
01010201	13100400	Compound Alginate Preparations	Parasiticidal Preparations (Topical)	1205	1521317	0.08%	356	273975	0.13%
05010500	13020100	Macrolides	Emollients	929	1521317	0.06%	356	273975	0.13%
05010102	11030100	Penicillinase-Resistant Penicillins	Antibacterials (In Eye Preparation)	1248	1521317	0.08%	355	273975	0.13%
04105100	06040103	Substance Dependence - Nicotine Dependence	Progestogen Products Doubling (In House Use)	1215	1521317	0.08%	355	273975	0.13%
04020101	05010102	First-Generation Antipsychotic Drugs	Penicillinase-Resistant Penicillins	896	1521317	0.06%	355	273975	0.13%
05011300	10010100	Urinary-Tract Infections	Non-Steroidal Anti-Inflammatory Drugs	859	1521317	0.06%	355	273975	0.13%
04070401	10010100	Acute Migraine	Non-Steroidal Anti-Inflammatory Drugs	613	1521317	0.04%	355	273975	0.13%
01060400	04070401	Osmotic Laxatives	Acute Migraine	565	1521317	0.04%	355	273975	0.13%
04010201	04105100	Benzodiazepines	Substance Dependence - Nicotine Dependence	477	1521317	0.03%	355	273975	0.13%
04060000	11040200	Products Used Against Nausea And Vertigo	Other Anti-Inflammatory Eye Preparations (For The Eye)	754	1521317	0.05%	354	273975	0.13%
04020100	07020250	Antipsychotic Products	Preparations For Vaginal And Vulval Candidiasis	1217	1521317	0.08%	353	273975	0.13%
05030201	09010101	Herpes Simplex And Varicella-Zoster Infection	Oral Iron	1203	1521317	0.08%	353	273975	0.13%
01010000	07020250	Indigestion And GORD (Gastro-Oesophageal Reflux Disease)	Preparations For Vaginal And Vulval Candidiasis	1119	1521317	0.07%	353	273975	0.13%
02060200	09010101	Calcium-Channel Blockers	Oral Iron	559	1521317	0.04%	353	273975	0.13%
09010101	12010300	Oral Iron	Drugs Acting On The Ear - Removal Of Ear Wax	1358	1521317	0.09%	352	273975	0.13%
13020102	13030000	Emollient Skin Preparations	Topical Local Anaesthetics And Antipruritics	1135	1521317	0.07%	352	273975	0.13%
01010000	05010103	Indigestion And GORD (Gastro-Oesophageal Reflux Disease)	Broad-Spectrum Penicillins	1119	1521317	0.07%	352	273975	0.13%
11030100	11040200	Antibacterials (In Eye Preparation)	Other Anti-Inflammatory Eye Preparations (For The Eye)	1009	1521317	0.07%	352	273975	0.13%
04105100	05010102	Substance Dependence - Nicotine Dependence	Penicillinase-Resistant Penicillins	930	1521317	0.06%	352	273975	0.13%
10010100	13020100	Non-Steroidal Anti-Inflammatory Drugs	Emollients	899	1521317	0.06%	352	273975	0.13%
04065500	13020102	Products Used Against Nausea And Vertigo - Domperidone & Metoclopramide	Emollient Skin Preparations	801	1521317	0.05%	352	273975	0.13%
05010103	11080100	Broad-Spectrum Penicillins	Tear Deficiency	787	1521317	0.05%	352	273975	0.13%
03010101	13060102	Selective Beta 2 Agonists	Topical Antibacterials For Acne	701	1521317	0.05%	352	273975	0.13%
04010201	04065400	Benzodiazepines	Products Used Against Nausea And Vertigo - Antihistamines	503	1521317	0.03%	352	273975	0.13%
03010101	09060700	Selective Beta 2 Agonists	Multivitamin And Multimineral Preparations	610	1521317	0.04%	351	273975	0.13%
05010102	05011100	Penicillinase-Resistant Penicillins	Metronidazole And Tinidazole	1140	1521317	0.07%	350	273975	0.13%
01070200	04065400	Compound Haemorrhoid Products With Corticosteroids	Products Used Against Nausea And Vertigo - Antihistamines	872	1521317	0.06%	350	273975	0.13%
05010300	05010500	Tetracyclines	Macrolides	821	1521317	0.05%	350	273975	0.13%
01040200	01070200	Antimotility Products	Compound Haemorrhoid Products With Corticosteroids	796	1521317	0.05%	350	273975	0.13%
04020000	04070100	Products Used In Psychoses And Related Disorders	Non-Opioid And Compound Analgesics	512	1521317	0.03%	350	273975	0.13%
03030200	12020101	Leukotriene Receptor Antagonists	Corticosteroids Used In Nasal Allergy	416	1521317	0.03%	350	273975	0.13%
04065400	05010800	Products Used Against Nausea And Vertigo - Antihistamines	Sulphonamides And Trimethoprim	1011	1521317	0.07%	349	273975	0.13%
04060000	09060400	Products Used Against Nausea And Vertigo	Vitamin D	892	1521317	0.06%	349	273975	0.13%
01040200	03040102	Antimotility Products	Sedating Antihistamines	663	1521317	0.04%	349	273975	0.13%
04010100	05011300	Hypnotics	Urinary-Tract Infections	663	1521317	0.04%	349	273975	0.13%
07020250	13100400	Preparations For Vaginal And Vulval Candidiasis	Parasiticidal Preparations (Topical)	1238	1521317	0.08%	348	273975	0.13%
03040102	04065500	Sedating Antihistamines	Products Used Against Nausea And Vertigo - Domperidone & Metoclopramide	883	1521317	0.06%	348	273975	0.13%
04105100	10010100	Substance Dependence - Nicotine Dependence	Non-Steroidal Anti-Inflammatory Drugs	843	1521317	0.06%	348	273975	0.13%
04030300	13100400	Selective Serotonin Re-Uptake Inhibitors (SSRI)	Parasiticidal Preparations (Topical)	556	1521317	0.04%	348	273975	0.13%
04010201	05010102	Benzodiazepines	Penicillinase-Resistant Penicillins	502	1521317	0.03%	348	273975	0.13%
01030500	10030250	Proton Pump Inhibitors	Topical Nsaids And Counter Irritants	593	1521317	0.04%	347	273975	0.13%
06020100	13020100	Thyroid Hormones	Emollients	516	1521317	0.03%	347	273975	0.13%
01030500	04070401	Proton Pump Inhibitors	Acute Migraine	491	1521317	0.03%	347	273975	0.13%
04020102	04030100	Second-Generation Antipsychotic Drugs	Tricyclic And Related Antidepressants	368	1521317	0.02%	347	273975	0.13%
05010102	05011300	Penicillinase-Resistant Penicillins	Urinary-Tract Infections	954	1521317	0.06%	346	273975	0.13%
03040102	05011300	Sedating Antihistamines	Urinary-Tract Infections	833	1521317	0.05%	346	273975	0.13%
04030400	04105100	Other Antidepressants	Substance Dependence - Nicotine Dependence	427	1521317	0.03%	346	273975	0.13%
03010101	03090200	Selective Beta 2 Agonists	Demulcent And Expectorant Cough Preparations	801	1521317	0.05%	345	273975	0.13%
02040000	05011300	Beta-Adrenoceptor Blockers	Urinary-Tract Infections	553	1521317	0.04%	345	273975	0.13%
13020102	13040200	Emollient Skin Preparations	Mild Topical Corticosteroids	1008	1521317	0.07%	344	273975	0.13%
01010000	04070100	Indigestion And GORD (Gastro-Oesophageal Reflux Disease)	Non-Opioid And Compound Analgesics	965	1521317	0.06%	344	273975	0.13%
04010201	04065500	Benzodiazepines	Products Used Against Nausea And Vertigo - Domperidone & Metoclopramide	481	1521317	0.03%	344	273975	0.13%
04065400	05010102	Products Used Against Nausea And Vertigo - Antihistamines	Penicillinase-Resistant Penicillins	897	1521317	0.06%	343	273975	0.13%
13020101	71580200	Emollient Bath Additives And Shower Preparations	Emollient Ointment	736	1521317	0.05%	343	273975	0.13%
03040102	04010201	Sedating Antihistamines	Benzodiazepines	491	1521317	0.03%	343	273975	0.13%
01030500	04070300	Proton Pump Inhibitors	Neuropathic Pain	421	1521317	0.03%	343	273975	0.13%
04070100	13090100	Non-Opioid And Compound Analgesics	Shampoos And Other Scalp Preparations	695	1521317	0.05%	342	273975	0.12%
01070200	04010100	Compound Haemorrhoid Products With Corticosteroids	Hypnotics	614	1521317	0.04%	342	273975	0.12%
01030500	13020101	Proton Pump Inhibitors	Emollient Bath Additives And Shower Preparations	549	1521317	0.04%	342	273975	0.12%
04030300	13090000	Selective Serotonin Re-Uptake Inhibitors (SSRI)	Shampoos And Other Preparations For Scalp And Hair Conditions	465	1521317	0.03%	342	273975	0.12%
01040200	06020100	Antimotility Products	Thyroid Hormones	452	1521317	0.03%	342	273975	0.12%
09010101	09020100	Oral Iron	Oral Preparations For Fluid And Electrolyte Imbalance	1095	1521317	0.07%	341	273975	0.12%
09010101	13090100	Oral Iron	Shampoos And Other Scalp Preparations	883	1521317	0.06%	341	273975	0.12%
06020100	09010200	Thyroid Hormones	Drugs Used In Megaloblastic Anaemias	488	1521317	0.03%	341	273975	0.12%
05010500	11030100	Macrolides	Antibacterials (In Eye Preparation)	1064	1521317	0.07%	340	273975	0.12%
04070401	13040000	Acute Migraine	Topical Corticosteroids	575	1521317	0.04%	340	273975	0.12%
01020200	03040101	Other Antispasmodics	Non-Sedating Antihistamines	531	1521317	0.03%	340	273975	0.12%
03030200	04070100	Leukotriene Receptor Antagonists	Non-Opioid And Compound Analgesics	421	1521317	0.03%	340	273975	0.12%
02120400	06010202	Statins	Biguanides (Metformin)	403	1521317	0.03%	340	273975	0.12%
01060400	13030000	Osmotic Laxatives	Topical Local Anaesthetics And Antipruritics	909	1521317	0.06%	339	273975	0.12%
02090000	04030400	Antiplatelet Products	Other Antidepressants	386	1521317	0.03%	339	273975	0.12%
13040000	71580100	Topical Corticosteroids	Emollient Cream	881	1521317	0.06%	338	273975	0.12%
01070000	12020101	Local Products For Anal Or Rectal Problems	Corticosteroids Used In Nasal Allergy	787	1521317	0.05%	338	273975	0.12%
01030100	04065600	H2-Receptor Antagonists	Products Used Against Nausea And Vertigo - 5 HT3 Antagonists	868	1521317	0.06%	337	273975	0.12%
05010201	09010200	Cephalosporins	Drugs Used In Megaloblastic Anaemias	837	1521317	0.06%	337	273975	0.12%
02040000	05010500	Beta-Adrenoceptor Blockers	Macrolides	557	1521317	0.04%	337	273975	0.12%
01010201	04080100	Compound Alginate Preparations	Control Of Epilepsy	526	1521317	0.03%	337	273975	0.12%
04070100	14040200	Non-Opioid And Compound Analgesics	Vaccines And Antisera - Influenza Vaccines	905	1521317	0.06%	336	273975	0.12%
01020200	12020101	Other Antispasmodics	Corticosteroids Used In Nasal Allergy	530	1521317	0.03%	336	273975	0.12%
09010101	09060300	Oral Iron	Vitamin C	1601	1521317	0.11%	335	273975	0.12%
05010102	05010800	Penicillinase-Resistant Penicillins	Sulphonamides And Trimethoprim	936	1521317	0.06%	335	273975	0.12%
01050200	06020100	Corticosteroids In Chronic Bowel Problems	Thyroid Hormones	427	1521317	0.03%	335	273975	0.12%
04105100	12020101	Substance Dependence - Nicotine Dependence	Corticosteroids Used In Nasal Allergy	692	1521317	0.05%	334	273975	0.12%
09060400	12020101	Vitamin D	Corticosteroids Used In Nasal Allergy	630	1521317	0.04%	334	273975	0.12%
05010103	09020100	Broad-Spectrum Penicillins	Oral Preparations For Fluid And Electrolyte Imbalance	961	1521317	0.06%	333	273975	0.12%
01060400	12010151	Osmotic Laxatives	Anti-Inflammatory Preparations	809	1521317	0.05%	333	273975	0.12%
03040101	11030100	Non-Sedating Antihistamines	Antibacterials (In Eye Preparation)	792	1521317	0.05%	333	273975	0.12%
05010500	11040200	Macrolides	Other Anti-Inflammatory Eye Preparations (For The Eye)	767	1521317	0.05%	333	273975	0.12%
02040000	13020102	Beta-Adrenoceptor Blockers	Emollient Skin Preparations	566	1521317	0.04%	333	273975	0.12%
02060200	02090000	Calcium-Channel Blockers	Antiplatelet Products	495	1521317	0.03%	333	273975	0.12%
05010103	05030201	Broad-Spectrum Penicillins	Herpes Simplex And Varicella-Zoster Infection	1049	1521317	0.07%	332	273975	0.12%
05010300	12020101	Tetracyclines	Corticosteroids Used In Nasal Allergy	692	1521317	0.05%	332	273975	0.12%
03020000	05011100	Corticosteroids (For Respiratory Conditions)	Metronidazole And Tinidazole	641	1521317	0.04%	332	273975	0.12%
04030400	04065500	Other Antidepressants	Products Used Against Nausea And Vertigo - Domperidone & Metoclopramide	410	1521317	0.03%	332	273975	0.12%
04070200	05011100	Opioid Analgesics	Metronidazole And Tinidazole	545	1521317	0.04%	331	273975	0.12%
02040000	06010101	Beta-Adrenoceptor Blockers	Short-Acting Insulins	400	1521317	0.03%	331	273975	0.12%
04065500	06040103	Products Used Against Nausea And Vertigo - Domperidone & Metoclopramide	Progestogen Products Doubling (In House Use)	995	1521317	0.07%	330	273975	0.12%
12030100	13040000	Drugs For Oral Ulceration And Inflammation	Topical Corticosteroids	891	1521317	0.06%	330	273975	0.12%
01060100	06020100	Bulk-Forming Laxatives	Thyroid Hormones	493	1521317	0.03%	330	273975	0.12%
01050200	04030100	Corticosteroids In Chronic Bowel Problems	Tricyclic And Related Antidepressants	408	1521317	0.03%	330	273975	0.12%
07020250	12020300	Preparations For Vaginal And Vulval Candidiasis	Nasal Preparations For Infection	968	1521317	0.06%	329	273975	0.12%
03040101	13030000	Non-Sedating Antihistamines	Topical Local Anaesthetics And Antipruritics	948	1521317	0.06%	329	273975	0.12%
01070200	13020100	Compound Haemorrhoid Products With Corticosteroids	Emollients	886	1521317	0.06%	329	273975	0.12%
01020200	04060000	Other Antispasmodics	Products Used Against Nausea And Vertigo	554	1521317	0.04%	329	273975	0.12%
01050200	04020101	Corticosteroids In Chronic Bowel Problems	First-Generation Antipsychotic Drugs	553	1521317	0.04%	329	273975	0.12%
01050100	04070100	Aminosalicylates	Non-Opioid And Compound Analgesics	507	1521317	0.03%	328	273975	0.12%
04020000	05010103	Products Used In Psychoses And Related Disorders	Broad-Spectrum Penicillins	498	1521317	0.03%	328	273975	0.12%
01050200	13020101	Corticosteroids In Chronic Bowel Problems	Emollient Bath Additives And Shower Preparations	455	1521317	0.03%	328	273975	0.12%
04070100	06010400	Non-Opioid And Compound Analgesics	Treatment Of Hypoglycaemia	443	1521317	0.03%	328	273975	0.12%
02090000	04065400	Antiplatelet Products	Products Used Against Nausea And Vertigo - Antihistamines	773	1521317	0.05%	327	273975	0.12%
01010201	13090100	Compound Alginate Preparations	Shampoos And Other Scalp Preparations	750	1521317	0.05%	326	273975	0.12%
04020100	04030300	Antipsychotic Products	Selective Serotonin Re-Uptake Inhibitors (SSRI)	515	1521317	0.03%	326	273975	0.12%
04070100	12010300	Non-Opioid And Compound Analgesics	Drugs Acting On The Ear - Removal Of Ear Wax	977	1521317	0.06%	325	273975	0.12%
01030100	05010800	H2-Receptor Antagonists	Sulphonamides And Trimethoprim	845	1521317	0.06%	325	273975	0.12%
01070200	04070200	Compound Haemorrhoid Products With Corticosteroids	Opioid Analgesics	590	1521317	0.04%	325	273975	0.12%
01030100	06010202	H2-Receptor Antagonists	Biguanides (Metformin)	553	1521317	0.04%	325	273975	0.12%
04065400	06020100	Products Used Against Nausea And Vertigo - Antihistamines	Thyroid Hormones	492	1521317	0.03%	325	273975	0.12%
04020102	04070200	Second-Generation Antipsychotic Drugs	Opioid Analgesics	336	1521317	0.02%	325	273975	0.12%
01010201	12020300	Compound Alginate Preparations	Nasal Preparations For Infection	940	1521317	0.06%	324	273975	0.12%
01010201	71580200	Compound Alginate Preparations	Emollient Ointment	814	1521317	0.05%	324	273975	0.12%
01030100	01060100	H2-Receptor Antagonists	Bulk-Forming Laxatives	791	1521317	0.05%	324	273975	0.12%
04060000	04105100	Products Used Against Nausea And Vertigo	Substance Dependence - Nicotine Dependence	749	1521317	0.05%	324	273975	0.12%
02090000	03040102	Antiplatelet Products	Sedating Antihistamines	681	1521317	0.04%	324	273975	0.12%
02090000	06010400	Antiplatelet Products	Treatment Of Hypoglycaemia	427	1521317	0.03%	324	273975	0.12%
05010101	12030100	Benzylpenicillin And Phenoxymethylpenicillin	Drugs For Oral Ulceration And Inflammation	1164	1521317	0.08%	323	273975	0.12%
01070200	04030100	Compound Haemorrhoid Products With Corticosteroids	Tricyclic And Related Antidepressants	483	1521317	0.03%	323	273975	0.12%
06040103	13020100	Progestogen Products Doubling (In House Use)	Emollients	1077	1521317	0.07%	322	273975	0.12%
06040103	11040200	Progestogen Products Doubling (In House Use)	Other Anti-Inflammatory Eye Preparations (For The Eye)	956	1521317	0.06%	322	273975	0.12%
11040200	13020101	Other Anti-Inflammatory Eye Preparations (For The Eye)	Emollient Bath Additives And Shower Preparations	565	1521317	0.04%	322	273975	0.12%
01060200	12020101	Stimulant Laxatives	Corticosteroids Used In Nasal Allergy	596	1521317	0.04%	321	273975	0.12%
04060000	13100101	Products Used Against Nausea And Vertigo	Antibacterial Preparations Only Used Topically	739	1521317	0.05%	320	273975	0.12%
01050200	01050300	Corticosteroids In Chronic Bowel Problems	Products Affecting The Immune Response In Chronic Bowel Problems	488	1521317	0.03%	320	273975	0.12%
01060200	04030100	Stimulant Laxatives	Tricyclic And Related Antidepressants	414	1521317	0.03%	320	273975	0.12%
04030300	04050100	Selective Serotonin Re-Uptake Inhibitors (SSRI)	Anti-Obesity Products Acting On The Gastro-Intestinal Tract	411	1521317	0.03%	320	273975	0.12%
04070100	15020000	Non-Opioid And Compound Analgesics	Local Anaesthesia	774	1521317	0.05%	319	273975	0.12%
04030300	14040200	Selective Serotonin Re-Uptake Inhibitors (SSRI)	Vaccines And Antisera - Influenza Vaccines	466	1521317	0.03%	319	273975	0.12%
02080100	06040102	Parenteral Anticoagulants	Progestogens And Progesterone Receptor Modulators	823	1521317	0.05%	318	273975	0.12%
01060200	10010100	Stimulant Laxatives	Non-Steroidal Anti-Inflammatory Drugs	643	1521317	0.04%	318	273975	0.12%
04065500	06020100	Products Used Against Nausea And Vertigo - Domperidone & Metoclopramide	Thyroid Hormones	435	1521317	0.03%	318	273975	0.12%
04060000	09010200	Products Used Against Nausea And Vertigo	Drugs Used In Megaloblastic Anaemias	731	1521317	0.05%	317	273975	0.12%
04010201	05010800	Benzodiazepines	Sulphonamides And Trimethoprim	498	1521317	0.03%	317	273975	0.12%
04030300	13100200	Selective Serotonin Re-Uptake Inhibitors (SSRI)	Antifungal Preparations (Topical	469	1521317	0.03%	317	273975	0.12%
04060000	06010101	Products Used Against Nausea And Vertigo	Short-Acting Insulins	453	1521317	0.03%	317	273975	0.12%
02040000	06010102	Beta-Adrenoceptor Blockers	Intermediate- And Long-Acting Insulins	389	1521317	0.03%	317	273975	0.12%
03090100	09010101	Cough Suppressants	Oral Iron	1326	1521317	0.09%	316	273975	0.12%
02090000	05010101	Antiplatelet Products	Benzylpenicillin And Phenoxymethylpenicillin	730	1521317	0.05%	316	273975	0.12%
05010500	13020101	Macrolides	Emollient Bath Additives And Shower Preparations	666	1521317	0.04%	316	273975	0.12%
03010101	04065600	Selective Beta 2 Agonists	Products Used Against Nausea And Vertigo - 5 HT3 Antagonists	496	1521317	0.03%	316	273975	0.12%
01020200	04070200	Other Antispasmodics	Opioid Analgesics	446	1521317	0.03%	316	273975	0.12%
01070200	05010101	Compound Haemorrhoid Products With Corticosteroids	Benzylpenicillin And Phenoxymethylpenicillin	984	1521317	0.06%	315	273975	0.11%
05010103	11040100	Broad-Spectrum Penicillins	Corticosteroids (In Eye Preparations)	839	1521317	0.06%	315	273975	0.11%
06010202	06040102	Biguanides (Metformin)	Progestogens And Progesterone Receptor Modulators	562	1521317	0.04%	315	273975	0.11%
03010101	13100200	Selective Beta 2 Agonists	Antifungal Preparations (Topical	602	1521317	0.04%	314	273975	0.11%
01070000	03020000	Local Products For Anal Or Rectal Problems	Corticosteroids (For Respiratory Conditions)	578	1521317	0.04%	314	273975	0.11%
01060400	13020103	Osmotic Laxatives	Antimicrobial Emollients	726	1521317	0.05%	313	273975	0.11%
13020102	13090100	Emollient Skin Preparations	Shampoos And Other Scalp Preparations	663	1521317	0.04%	313	273975	0.11%
04010201	05011300	Benzodiazepines	Urinary-Tract Infections	447	1521317	0.03%	313	273975	0.11%
01020200	04030100	Other Antispasmodics	Tricyclic And Related Antidepressants	438	1521317	0.03%	313	273975	0.11%
02110000	10010100	Antifibrinolytic Products And Haemostatics	Non-Steroidal Anti-Inflammatory Drugs	780	1521317	0.05%	312	273975	0.11%
07020250	11080100	Preparations For Vaginal And Vulval Candidiasis	Tear Deficiency	730	1521317	0.05%	312	273975	0.11%
03040101	04105100	Non-Sedating Antihistamines	Substance Dependence - Nicotine Dependence	623	1521317	0.04%	312	273975	0.11%
01030500	05010300	Proton Pump Inhibitors	Tetracyclines	513	1521317	0.03%	312	273975	0.11%
01050200	05011300	Corticosteroids In Chronic Bowel Problems	Urinary-Tract Infections	502	1521317	0.03%	312	273975	0.11%
01070100	01070200	Soothing Haemorrhoid Products	Compound Haemorrhoid Products With Corticosteroids	1061	1521317	0.07%	311	273975	0.11%
03090100	04070100	Cough Suppressants	Non-Opioid And Compound Analgesics	1014	1521317	0.07%	311	273975	0.11%
02090000	05010800	Antiplatelet Products	Sulphonamides And Trimethoprim	680	1521317	0.04%	311	273975	0.11%
01020200	10010100	Other Antispasmodics	Non-Steroidal Anti-Inflammatory Drugs	602	1521317	0.04%	311	273975	0.11%
04010100	13020100	Hypnotics	Emollients	519	1521317	0.03%	311	273975	0.11%
03040101	09060400	Non-Sedating Antihistamines	Vitamin D	515	1521317	0.03%	311	273975	0.11%
04070200	04070401	Opioid Analgesics	Acute Migraine	432	1521317	0.03%	311	273975	0.11%
01030500	03030200	Proton Pump Inhibitors	Leukotriene Receptor Antagonists	356	1521317	0.02%	311	273975	0.11%
01060100	04020101	Bulk-Forming Laxatives	First-Generation Antipsychotic Drugs	722	1521317	0.05%	310	273975	0.11%
01030500	09060700	Proton Pump Inhibitors	Multivitamin And Multimineral Preparations	532	1521317	0.03%	310	273975	0.11%
02050501	02090000	Angiotensin-Converting Enzyme Inhibitors (ACE Inhibitors)	Antiplatelet Products	401	1521317	0.03%	310	273975	0.11%
04020102	04060000	Second-Generation Antipsychotic Drugs	Products Used Against Nausea And Vertigo	343	1521317	0.02%	310	273975	0.11%
10010100	10030250	Non-Steroidal Anti-Inflammatory Drugs	Topical Nsaids And Counter Irritants	771	1521317	0.05%	309	273975	0.11%
01020100	04070100	Antimuscarinics	Non-Opioid And Compound Analgesics	643	1521317	0.04%	309	273975	0.11%
02050200	03010101	Centrally Acting Antihypertensive Products	Selective Beta 2 Agonists	411	1521317	0.03%	309	273975	0.11%
04020101	04020102	First-Generation Antipsychotic Drugs	Second-Generation Antipsychotic Drugs	339	1521317	0.02%	309	273975	0.11%
05010103	15020000	Broad-Spectrum Penicillins	Local Anaesthesia	835	1521317	0.05%	308	273975	0.11%
01020200	06040103	Other Antispasmodics	Progestogen Products Doubling (In House Use)	811	1521317	0.05%	308	273975	0.11%
04070100	05011200	Non-Opioid And Compound Analgesics	Quinolones	739	1521317	0.05%	308	273975	0.11%
01060400	13040200	Osmotic Laxatives	Mild Topical Corticosteroids	927	1521317	0.06%	307	273975	0.11%
01070200	05011300	Compound Haemorrhoid Products With Corticosteroids	Urinary-Tract Infections	868	1521317	0.06%	307	273975	0.11%
05010201	05020100	Cephalosporins	Triazole Antifungals	786	1521317	0.05%	307	273975	0.11%
05010103	13090100	Broad-Spectrum Penicillins	Shampoos And Other Scalp Preparations	667	1521317	0.04%	307	273975	0.11%
01050200	11040200	Corticosteroids In Chronic Bowel Problems	Other Anti-Inflammatory Eye Preparations (For The Eye)	523	1521317	0.03%	307	273975	0.11%
01050200	04065400	Corticosteroids In Chronic Bowel Problems	Products Used Against Nausea And Vertigo - Antihistamines	501	1521317	0.03%	307	273975	0.11%
03010101	13090100	Selective Beta 2 Agonists	Shampoos And Other Scalp Preparations	430	1521317	0.03%	307	273975	0.11%
01050200	04010201	Corticosteroids In Chronic Bowel Problems	Benzodiazepines	357	1521317	0.02%	307	273975	0.11%
05010103	07020251	Broad-Spectrum Penicillins	Preparations For Other Vaginal Infections	941	1521317	0.06%	306	273975	0.11%
04060000	13020100	Products Used Against Nausea And Vertigo	Emollients	802	1521317	0.05%	306	273975	0.11%
01060100	10010100	Bulk-Forming Laxatives	Non-Steroidal Anti-Inflammatory Drugs	796	1521317	0.05%	306	273975	0.11%
05010102	13020103	Penicillinase-Resistant Penicillins	Antimicrobial Emollients	753	1521317	0.05%	306	273975	0.11%
04070100	09050101	Non-Opioid And Compound Analgesics	Calcium Supplements	739	1521317	0.05%	306	273975	0.11%
02040000	05010102	Beta-Adrenoceptor Blockers	Penicillinase-Resistant Penicillins	540	1521317	0.04%	306	273975	0.11%
01050300	09010101	Products Affecting The Immune Response In Chronic Bowel Problems	Oral Iron	482	1521317	0.03%	306	273975	0.11%
04030300	13060100	Selective Serotonin Re-Uptake Inhibitors (SSRI)	Topical Preparations For Acne	438	1521317	0.03%	306	273975	0.11%
04070100	12020300	Non-Opioid And Compound Analgesics	Nasal Preparations For Infection	788	1521317	0.05%	305	273975	0.11%
04030000	04030400	Antidepressants	Other Antidepressants	337	1521317	0.02%	305	273975	0.11%
01010201	03090100	Compound Alginate Preparations	Cough Suppressants	1119	1521317	0.07%	304	273975	0.11%
01070200	02090000	Compound Haemorrhoid Products With Corticosteroids	Antiplatelet Products	726	1521317	0.05%	304	273975	0.11%
02090000	02120400	Antiplatelet Products	Statins	372	1521317	0.02%	304	273975	0.11%
02120400	04070100	Statins	Non-Opioid And Compound Analgesics	356	1521317	0.02%	304	273975	0.11%
14040200	14040800	Vaccines And Antisera - Influenza Vaccines	Vaccines And Antisera - Diphtheria Vaccines	1365	1521317	0.09%	303	273975	0.11%
03040102	06040103	Sedating Antihistamines	Progestogen Products Doubling (In House Use)	986	1521317	0.06%	303	273975	0.11%
12020101	13020103	Corticosteroids Used In Nasal Allergy	Antimicrobial Emollients	516	1521317	0.03%	303	273975	0.11%
01060200	03040101	Stimulant Laxatives	Non-Sedating Antihistamines	505	1521317	0.03%	303	273975	0.11%
01060100	01070000	Bulk-Forming Laxatives	Local Products For Anal Or Rectal Problems	1051	1521317	0.07%	302	273975	0.11%
04070100	05030201	Non-Opioid And Compound Analgesics	Herpes Simplex And Varicella-Zoster Infection	887	1521317	0.06%	302	273975	0.11%
07020250	13090100	Preparations For Vaginal And Vulval Candidiasis	Shampoos And Other Scalp Preparations	675	1521317	0.04%	302	273975	0.11%
11080100	13040000	Tear Deficiency	Topical Corticosteroids	570	1521317	0.04%	302	273975	0.11%
03040101	05010300	Non-Sedating Antihistamines	Tetracyclines	554	1521317	0.04%	302	273975	0.11%
03010101	03010300	Selective Beta 2 Agonists	Theophylline	398	1521317	0.03%	302	273975	0.11%
03010000	05010500	Bronchodilators	Macrolides	561	1521317	0.04%	301	273975	0.11%
03010101	05030201	Selective Beta 2 Agonists	Herpes Simplex And Varicella-Zoster Infection	512	1521317	0.03%	301	273975	0.11%
01020200	01040200	Other Antispasmodics	Antimotility Products	501	1521317	0.03%	301	273975	0.11%
03020000	09060400	Corticosteroids (For Respiratory Conditions)	Vitamin D	447	1521317	0.03%	301	273975	0.11%
01030100	06040103	H2-Receptor Antagonists	Progestogen Products Doubling (In House Use)	829	1521317	0.05%	300	273975	0.11%
04070100	09020100	Non-Opioid And Compound Analgesics	Oral Preparations For Fluid And Electrolyte Imbalance	776	1521317	0.05%	300	273975	0.11%
01040200	05010800	Antimotility Products	Sulphonamides And Trimethoprim	688	1521317	0.05%	300	273975	0.11%
04010201	06020100	Benzodiazepines	Thyroid Hormones	342	1521317	0.02%	300	273975	0.11%
04065500	05010800	Products Used Against Nausea And Vertigo - Domperidone & Metoclopramide	Sulphonamides And Trimethoprim	743	1521317	0.05%	299	273975	0.11%
02050200	07020250	Centrally Acting Antihypertensive Products	Preparations For Vaginal And Vulval Candidiasis	489	1521317	0.03%	299	273975	0.11%
04030100	04105100	Tricyclic And Related Antidepressants	Substance Dependence - Nicotine Dependence	440	1521317	0.03%	299	273975	0.11%
06010101	13020102	Short-Acting Insulins	Emollient Skin Preparations	425	1521317	0.03%	299	273975	0.11%
04020102	13040000	Second-Generation Antipsychotic Drugs	Topical Corticosteroids	327	1521317	0.02%	299	273975	0.11%
01060100	05010500	Bulk-Forming Laxatives	Macrolides	761	1521317	0.05%	298	273975	0.11%
10010100	11040200	Non-Steroidal Anti-Inflammatory Drugs	Other Anti-Inflammatory Eye Preparations (For The Eye)	706	1521317	0.05%	298	273975	0.11%
05010300	10010100	Tetracyclines	Non-Steroidal Anti-Inflammatory Drugs	658	1521317	0.04%	298	273975	0.11%
04060000	06010202	Products Used Against Nausea And Vertigo	Biguanides (Metformin)	575	1521317	0.04%	298	273975	0.11%
05010102	11040200	Penicillinase-Resistant Penicillins	Other Anti-Inflammatory Eye Preparations (For The Eye)	731	1521317	0.05%	297	273975	0.11%
06010202	09060400	Biguanides (Metformin)	Vitamin D	506	1521317	0.03%	297	273975	0.11%
05010102	06010101	Penicillinase-Resistant Penicillins	Short-Acting Insulins	440	1521317	0.03%	297	273975	0.11%
03040102	04030400	Sedating Antihistamines	Other Antidepressants	370	1521317	0.02%	297	273975	0.11%
04060000	09020100	Products Used Against Nausea And Vertigo	Oral Preparations For Fluid And Electrolyte Imbalance	953	1521317	0.06%	296	273975	0.11%
04065400	06040103	Products Used Against Nausea And Vertigo - Antihistamines	Progestogen Products Doubling (In House Use)	922	1521317	0.06%	296	273975	0.11%
04020101	05010101	First-Generation Antipsychotic Drugs	Benzylpenicillin And Phenoxymethylpenicillin	859	1521317	0.06%	296	273975	0.11%
04070100	71580200	Non-Opioid And Compound Analgesics	Emollient Ointment	637	1521317	0.04%	296	273975	0.11%
01030100	01060200	H2-Receptor Antagonists	Stimulant Laxatives	608	1521317	0.04%	296	273975	0.11%
01050100	01050300	Aminosalicylates	Products Affecting The Immune Response In Chronic Bowel Problems	520	1521317	0.03%	296	273975	0.11%
04050100	04070100	Anti-Obesity Products Acting On The Gastro-Intestinal Tract	Non-Opioid And Compound Analgesics	510	1521317	0.03%	296	273975	0.11%
01030500	04030000	Proton Pump Inhibitors	Antidepressants	333	1521317	0.02%	296	273975	0.11%
03020000	13020103	Corticosteroids (For Respiratory Conditions)	Antimicrobial Emollients	470	1521317	0.03%	295	273975	0.11%
01070200	04010201	Compound Haemorrhoid Products With Corticosteroids	Benzodiazepines	456	1521317	0.03%	295	273975	0.11%
01040200	02040000	Antimotility Products	Beta-Adrenoceptor Blockers	447	1521317	0.03%	295	273975	0.11%
03040102	05010101	Sedating Antihistamines	Benzylpenicillin And Phenoxymethylpenicillin	850	1521317	0.06%	294	273975	0.11%
01060100	04030100	Bulk-Forming Laxatives	Tricyclic And Related Antidepressants	450	1521317	0.03%	294	273975	0.11%
01030100	06010101	H2-Receptor Antagonists	Short-Acting Insulins	417	1521317	0.03%	294	273975	0.11%
01050200	04010100	Corticosteroids In Chronic Bowel Problems	Hypnotics	401	1521317	0.03%	294	273975	0.11%
04030100	04070300	Tricyclic And Related Antidepressants	Neuropathic Pain	379	1521317	0.02%	294	273975	0.11%
01060400	14040800	Osmotic Laxatives	Vaccines And Antisera - Diphtheria Vaccines	988	1521317	0.06%	293	273975	0.11%
05010201	05010300	Cephalosporins	Tetracyclines	699	1521317	0.05%	293	273975	0.11%
01010201	12010300	Compound Alginate Preparations	Drugs Acting On The Ear - Removal Of Ear Wax	915	1521317	0.06%	292	273975	0.11%
01060200	03020000	Stimulant Laxatives	Corticosteroids (For Respiratory Conditions)	443	1521317	0.03%	292	273975	0.11%
04060000	06010102	Products Used Against Nausea And Vertigo	Intermediate- And Long-Acting Insulins	423	1521317	0.03%	292	273975	0.11%
06010202	10010100	Biguanides (Metformin)	Non-Steroidal Anti-Inflammatory Drugs	411	1521317	0.03%	292	273975	0.11%
03040101	06010102	Non-Sedating Antihistamines	Intermediate- And Long-Acting Insulins	376	1521317	0.02%	292	273975	0.11%
01070000	13020102	Local Products For Anal Or Rectal Problems	Emollient Skin Preparations	898	1521317	0.06%	291	273975	0.11%
05010103	09050101	Broad-Spectrum Penicillins	Calcium Supplements	779	1521317	0.05%	291	273975	0.11%
01050200	06040102	Corticosteroids In Chronic Bowel Problems	Progestogens And Progesterone Receptor Modulators	651	1521317	0.04%	291	273975	0.11%
03040101	13100101	Non-Sedating Antihistamines	Antibacterial Preparations Only Used Topically	641	1521317	0.04%	291	273975	0.11%
01060400	02080100	Osmotic Laxatives	Parenteral Anticoagulants	594	1521317	0.04%	291	273975	0.11%
01030500	11030100	Proton Pump Inhibitors	Antibacterials (In Eye Preparation)	584	1521317	0.04%	291	273975	0.11%
[truncated: 30,097 more rows]
